# Supplementary material for: Investigating the Conformations of a Family of [M2L3]4+ Helicates Using Single Crystal X-ray Diffraction
Source: MDPI journal article supplement (doi:10.3390/molecules28031404), 2023-02-01

## checkCIF/PLATON report

Structure factors have been supplied for datablock(s) cut83\_a

THIS REPORT IS FOR GUIDANCE ONLY. IF USED AS PART OF A REVIEW PROCEDURE FOR PUBLICATION, IT SHOULD NOT REPLACE THE EXPERTISE OF AN EXPERIENCED CRYSTALLOGRAPHIC REFEREE.

No syntax errors found.      CIF dictionary      Interpreting this report

### Datablock: cut83\_a

---

Bond precision:      C-C = 0.0047 Å      Wavelength=0.71073

Cell:                      a=19.950 (4)                      b=20.310 (4)                      c=40.550 (8)  
                             alpha=91.68 (3)                      beta=99.57 (3)                      gamma=94.23 (3)  
Temperature:              100 K

|                        | Calculated                                                                                                              | Reported                               |
|------------------------|-------------------------------------------------------------------------------------------------------------------------|----------------------------------------|
| Volume                 | 16143 (6)                                                                                                               | 16143 (6)                              |
| Space group            | P -1                                                                                                                    | P -1                                   |
| Hall group             | -P 1                                                                                                                    | -P 1                                   |
| Moiety formula         | 6(C90 H66 Cu2 N24 O3), 24(B C90 H66 Cu2 N24 O3, 4(B F4), 4.667(C4 H10 O), C4 O, F4), 5.5(C2 H3 N), 0.778(C4 H10 O), 0.1 |                                        |
| Sum formula            | C628.67 H541.67 B24 Cu12 F96 N177 O24.67                                                                                | C104.78 H90.28 B4 Cu2 F16 N29.50 O4.11 |
| Mr                     | 13816.80                                                                                                                | 2302.78                                |
| Dx, g cm <sup>-3</sup> | 1.421                                                                                                                   | 1.421                                  |
| Z                      | 1                                                                                                                       | 6                                      |
| Mu (mm <sup>-1</sup> ) | 0.490                                                                                                                   | 0.490                                  |
| F000                   | 7082.0                                                                                                                  | 7082.0                                 |
| F000'                  | 7089.18                                                                                                                 |                                        |
| h, k, lmax             | 24, 25, 50                                                                                                              | 24, 24, 50                             |
| Nref                   | 63602                                                                                                                   | 60876                                  |
| Tmin, Tmax             | 0.889, 0.952                                                                                                            |                                        |
| Tmin'                  | 0.822                                                                                                                   |                                        |

Correction method= Not given

Data completeness= 0.957

Theta(max)= 26.022

R(reflections)= 0.0601( 51462)

wR2(reflections)=  
0.1838( 60876)

S = 1.021

Npar= 4527

The following ALERTS were generated. Each ALERT has the format

**test-name\_ALERT\_alert-type\_alert-level.**

Click on the hyperlinks for more details of the test.

---

### Alert level B

|                   |                                                |          |
|-------------------|------------------------------------------------|----------|
| PLAT201_ALERT_2_B | Isotropic non-H Atoms in Main Residue(s) ..... | 6 Report |
| N1F               | C1F C2F C3F C4F                                | etc.     |

**Author Response: Orientational disorder was present in one helicate (ligand F at the Cu3 end). The low electron density associated with the second part prevented its modelling, and this residual electron density caused problems in modelling the main part anisotropically.**

---

### Alert level C

|                   |                                                  |              |
|-------------------|--------------------------------------------------|--------------|
| PLAT077_ALERT_4_C | Unitcell Contains Non-integer Number of Atoms .. | Please Check |
| PLAT202_ALERT_3_C | Isotropic non-H Atoms in Anion/Solvent .....     | 8 Check      |
|                   | O1ET C2ET C3ET C1ET C4ET N1T2                    | etc.         |
| PLAT220_ALERT_2_C | NonSolvent Resd 2 C Ueq(max)/Ueq(min) Range      | 3.3 Ratio    |
| PLAT241_ALERT_2_C | High 'MainMol' Ueq as Compared to Neighbors of   | C5F Check    |
| PLAT241_ALERT_2_C | High 'MainMol' Ueq as Compared to Neighbors of   | C12F Check   |
| PLAT243_ALERT_4_C | High 'Solvent' Ueq as Compared to Neighbors of   | C3EU Check   |
| PLAT244_ALERT_4_C | Low 'Solvent' Ueq as Compared to Neighbors of    | C1S1 Check   |
| PLAT244_ALERT_4_C | Low 'Solvent' Ueq as Compared to Neighbors of    | C1T6 Check   |
| PLAT244_ALERT_4_C | Low 'Solvent' Ueq as Compared to Neighbors of    | C1T1 Check   |
| PLAT244_ALERT_4_C | Low 'Solvent' Ueq as Compared to Neighbors of    | C1S2 Check   |
| PLAT244_ALERT_4_C | Low 'Solvent' Ueq as Compared to Neighbors of    | C1T9 Check   |
| PLAT244_ALERT_4_C | Low 'Solvent' Ueq as Compared to Neighbors of    | C1T4 Check   |
| PLAT244_ALERT_4_C | Low 'Solvent' Ueq as Compared to Neighbors of    | C1S3 Check   |
| PLAT244_ALERT_4_C | Low 'Solvent' Ueq as Compared to Neighbors of    | C1S6 Check   |
| PLAT244_ALERT_4_C | Low 'Solvent' Ueq as Compared to Neighbors of    | C1T2 Check   |
| PLAT260_ALERT_2_C | Large Average Ueq of Residue Including O1EU      | 0.109 Check  |
| PLAT260_ALERT_2_C | Large Average Ueq of Residue Including F17B      | 0.136 Check  |
| PLAT260_ALERT_2_C | Large Average Ueq of Residue Including F45B      | 0.129 Check  |
| PLAT260_ALERT_2_C | Large Average Ueq of Residue Including N1T9      | 0.114 Check  |
| PLAT767_ALERT_4_C | INS Embedded LIST 6 Instruction Should be LIST 4 | Please Check |
| PLAT790_ALERT_4_C | Centre of Gravity not Within Unit Cell: Resd. #  | 1 Note       |
|                   | C90 H66 Cu2 N24 O3                               |              |
| PLAT911_ALERT_3_C | Missing FCF Refl Between Thmin & STh/L= 0.600    | 1090 Report  |
| PLAT918_ALERT_3_C | Reflection(s) with I(obs) much Smaller I(calc) . | 22 Check     |
| PLAT971_ALERT_2_C | Check Calcd Resid. Dens. 0.71Ang From C1T8       | 1.80 eA-3    |
| PLAT975_ALERT_2_C | Check Calcd Resid. Dens. 1.04Ang From N1T7 .     | 1.45 eA-3    |
| PLAT975_ALERT_2_C | Check Calcd Resid. Dens. 0.94Ang From N1T8 .     | 0.84 eA-3    |
| PLAT977_ALERT_2_C | Check Negative Difference Density on H4F .       | -0.43 eA-3   |

---

### Alert level G

[illegible]

[illegible]

|                   |                                                  |                |        |       |
|-------------------|--------------------------------------------------|----------------|--------|-------|
| PLAT300_ALERT_4_G | Atom Site Occupancy of H2TR                      | Constrained at | 0.3333 | Check |
| PLAT300_ALERT_4_G | Atom Site Occupancy of N1T7                      | Constrained at | 0.3333 | Check |
| PLAT300_ALERT_4_G | Atom Site Occupancy of C1T7                      | Constrained at | 0.3333 | Check |
| PLAT300_ALERT_4_G | Atom Site Occupancy of C2T7                      | Constrained at | 0.3333 | Check |
| PLAT300_ALERT_4_G | Atom Site Occupancy of H2TY                      | Constrained at | 0.3333 | Check |
| PLAT300_ALERT_4_G | Atom Site Occupancy of Hb                        | Constrained at | 0.3333 | Check |
| PLAT300_ALERT_4_G | Atom Site Occupancy of Hc                        | Constrained at | 0.3333 | Check |
| PLAT300_ALERT_4_G | Atom Site Occupancy of O1W                       | Constrained at | 0.5    | Check |
| PLAT302_ALERT_4_G | Anion/Solvent/Minor-Residue Disorder (Resd 7 )   |                | 100%   | Note  |
| PLAT302_ALERT_4_G | Anion/Solvent/Minor-Residue Disorder (Resd 8 )   |                | 100%   | Note  |
| PLAT302_ALERT_4_G | Anion/Solvent/Minor-Residue Disorder (Resd 9 )   |                | 100%   | Note  |
| PLAT302_ALERT_4_G | Anion/Solvent/Minor-Residue Disorder (Resd 11 )  |                | 100%   | Note  |
| PLAT302_ALERT_4_G | Anion/Solvent/Minor-Residue Disorder (Resd 15 )  |                | 100%   | Note  |
| PLAT302_ALERT_4_G | Anion/Solvent/Minor-Residue Disorder (Resd 16 )  |                | 100%   | Note  |
| PLAT302_ALERT_4_G | Anion/Solvent/Minor-Residue Disorder (Resd 18 )  |                | 100%   | Note  |
| PLAT302_ALERT_4_G | Anion/Solvent/Minor-Residue Disorder (Resd 19 )  |                | 100%   | Note  |
| PLAT302_ALERT_4_G | Anion/Solvent/Minor-Residue Disorder (Resd 20 )  |                | 100%   | Note  |
| PLAT302_ALERT_4_G | Anion/Solvent/Minor-Residue Disorder (Resd 21 )  |                | 100%   | Note  |
| PLAT302_ALERT_4_G | Anion/Solvent/Minor-Residue Disorder (Resd 22 )  |                | 100%   | Note  |
| PLAT302_ALERT_4_G | Anion/Solvent/Minor-Residue Disorder (Resd 23 )  |                | 100%   | Note  |
| PLAT302_ALERT_4_G | Anion/Solvent/Minor-Residue Disorder (Resd 24 )  |                | 100%   | Note  |
| PLAT302_ALERT_4_G | Anion/Solvent/Minor-Residue Disorder (Resd 40 )  |                | 100%   | Note  |
| PLAT302_ALERT_4_G | Anion/Solvent/Minor-Residue Disorder (Resd 41 )  |                | 100%   | Note  |
| PLAT302_ALERT_4_G | Anion/Solvent/Minor-Residue Disorder (Resd 42 )  |                | 100%   | Note  |
| PLAT302_ALERT_4_G | Anion/Solvent/Minor-Residue Disorder (Resd 43 )  |                | 100%   | Note  |
| PLAT302_ALERT_4_G | Anion/Solvent/Minor-Residue Disorder (Resd 44 )  |                | 100%   | Note  |
| PLAT304_ALERT_4_G | Non-Integer Number of Atoms in ..... (Resd 7 )   |                | 3.40   | Check |
| PLAT304_ALERT_4_G | Non-Integer Number of Atoms in ..... (Resd 8 )   |                | 2.55   | Check |
| PLAT304_ALERT_4_G | Non-Integer Number of Atoms in ..... (Resd 11 )  |                | 2.75   | Check |
| PLAT304_ALERT_4_G | Non-Integer Number of Atoms in ..... (Resd 15 )  |                | 3.31   | Check |
| PLAT304_ALERT_4_G | Non-Integer Number of Atoms in ..... (Resd 19 )  |                | 2.50   | Check |
| PLAT304_ALERT_4_G | Non-Integer Number of Atoms in ..... (Resd 20 )  |                | 1.60   | Check |
| PLAT304_ALERT_4_G | Non-Integer Number of Atoms in ..... (Resd 22 )  |                | 2.45   | Check |
| PLAT304_ALERT_4_G | Non-Integer Number of Atoms in ..... (Resd 23 )  |                | 2.25   | Check |
| PLAT304_ALERT_4_G | Non-Integer Number of Atoms in ..... (Resd 24 )  |                | 1.69   | Check |
| PLAT304_ALERT_4_G | Non-Integer Number of Atoms in ..... (Resd 44 )  |                | 0.50   | Check |
| PLAT311_ALERT_2_G | Isolated Disordered Oxygen Atom (No H's ?) ..... |                | O1W    | Check |
| PLAT315_ALERT_2_G | Singly Bonded Carbon Detected (H-atoms Missing). |                | C1EV   | Check |
| PLAT315_ALERT_2_G | Singly Bonded Carbon Detected (H-atoms Missing). |                | C4EV   | Check |
| PLAT413_ALERT_2_G | Short Inter XH3 .. XHn H7A ..Hc .                |                | 2.11   | Ang.  |
|                   |                                                  | x,y,z =        | 1_555  | Check |
| PLAT432_ALERT_2_G | Short Inter X...Y Contact F14A ..C24B .          |                | 2.89   | Ang.  |
|                   |                                                  | 1+x,y,z =      | 1_655  | Check |
| PLAT432_ALERT_2_G | Short Inter X...Y Contact F18A ..C7F .           |                | 2.96   | Ang.  |
|                   |                                                  | x,y,z =        | 1_555  | Check |
| PLAT432_ALERT_2_G | Short Inter X...Y Contact F19A ..C2T8 .          |                | 2.91   | Ang.  |
|                   |                                                  | x,1+y,z =      | 1_565  | Check |
| PLAT432_ALERT_2_G | Short Inter X...Y Contact C27C ..C2T3 .          |                | 3.19   | Ang.  |
|                   |                                                  | x,y,z =        | 1_555  | Check |
| PLAT432_ALERT_2_G | Short Inter X...Y Contact C28C ..C2T3 .          |                | 3.17   | Ang.  |
|                   |                                                  | x,y,z =        | 1_555  | Check |
| PLAT720_ALERT_4_G | Number of Unusual/Non-Standard Labels .....      |                | 157    | Note  |
| PLAT789_ALERT_4_G | Atoms with Negative _atom_site_disorder_group #  |                | 5      | Check |
| PLAT790_ALERT_4_G | Centre of Gravity not Within Unit Cell: Resd. #  |                | 2      | Note  |
|                   | C90 H66 Cu2 N24 O3                               |                |        |       |
| PLAT790_ALERT_4_G | Centre of Gravity not Within Unit Cell: Resd. #  |                | 3      | Note  |
|                   | C90 H66 Cu2 N24 O3                               |                |        |       |

|                                                                               |         |
|-------------------------------------------------------------------------------|---------|
| PLAT790_ALERT_4_G Centre of Gravity not Within Unit Cell: Resd. #<br>B F4     | 4 Note  |
| PLAT790_ALERT_4_G Centre of Gravity not Within Unit Cell: Resd. #<br>B F4     | 5 Note  |
| PLAT790_ALERT_4_G Centre of Gravity not Within Unit Cell: Resd. #<br>B F4     | 6 Note  |
| PLAT790_ALERT_4_G Centre of Gravity not Within Unit Cell: Resd. #<br>B F4     | 7 Note  |
| PLAT790_ALERT_4_G Centre of Gravity not Within Unit Cell: Resd. #<br>B F4     | 8 Note  |
| PLAT790_ALERT_4_G Centre of Gravity not Within Unit Cell: Resd. #<br>B F4     | 9 Note  |
| PLAT790_ALERT_4_G Centre of Gravity not Within Unit Cell: Resd. #<br>B F4     | 10 Note |
| PLAT790_ALERT_4_G Centre of Gravity not Within Unit Cell: Resd. #<br>B F4     | 11 Note |
| PLAT790_ALERT_4_G Centre of Gravity not Within Unit Cell: Resd. #<br>B F4     | 12 Note |
| PLAT790_ALERT_4_G Centre of Gravity not Within Unit Cell: Resd. #<br>B F4     | 13 Note |
| PLAT790_ALERT_4_G Centre of Gravity not Within Unit Cell: Resd. #<br>B F4     | 14 Note |
| PLAT790_ALERT_4_G Centre of Gravity not Within Unit Cell: Resd. #<br>B F4     | 15 Note |
| PLAT790_ALERT_4_G Centre of Gravity not Within Unit Cell: Resd. #<br>C4 H10 O | 16 Note |
| PLAT790_ALERT_4_G Centre of Gravity not Within Unit Cell: Resd. #<br>C4 H10 O | 17 Note |
| PLAT790_ALERT_4_G Centre of Gravity not Within Unit Cell: Resd. #<br>C4 H10 O | 18 Note |
| PLAT790_ALERT_4_G Centre of Gravity not Within Unit Cell: Resd. #<br>C4 O     | 19 Note |
| PLAT790_ALERT_4_G Centre of Gravity not Within Unit Cell: Resd. #<br>B F4     | 20 Note |
| PLAT790_ALERT_4_G Centre of Gravity not Within Unit Cell: Resd. #<br>B F4     | 21 Note |
| PLAT790_ALERT_4_G Centre of Gravity not Within Unit Cell: Resd. #<br>B F4     | 22 Note |
| PLAT790_ALERT_4_G Centre of Gravity not Within Unit Cell: Resd. #<br>B F4     | 23 Note |
| PLAT790_ALERT_4_G Centre of Gravity not Within Unit Cell: Resd. #<br>B F4     | 24 Note |
| PLAT790_ALERT_4_G Centre of Gravity not Within Unit Cell: Resd. #<br>C2 H3 N  | 25 Note |
| PLAT790_ALERT_4_G Centre of Gravity not Within Unit Cell: Resd. #<br>C2 H3 N  | 26 Note |
| PLAT790_ALERT_4_G Centre of Gravity not Within Unit Cell: Resd. #<br>C2 H3 N  | 27 Note |
| PLAT790_ALERT_4_G Centre of Gravity not Within Unit Cell: Resd. #<br>C2 H3 N  | 28 Note |
| PLAT790_ALERT_4_G Centre of Gravity not Within Unit Cell: Resd. #<br>C2 H3 N  | 29 Note |
| PLAT790_ALERT_4_G Centre of Gravity not Within Unit Cell: Resd. #<br>C2 H3 N  | 30 Note |
| PLAT790_ALERT_4_G Centre of Gravity not Within Unit Cell: Resd. #<br>C2 H3 N  | 31 Note |
| PLAT790_ALERT_4_G Centre of Gravity not Within Unit Cell: Resd. #             | 32 Note |

|                                                                    |      |             |      |
|--------------------------------------------------------------------|------|-------------|------|
| C2 H3 N                                                            |      |             |      |
| PLAT790_ALERT_4_G Centre of Gravity not Within Unit Cell: Resd. #  |      | 33          | Note |
| C2 H3 N                                                            |      |             |      |
| PLAT790_ALERT_4_G Centre of Gravity not Within Unit Cell: Resd. #  |      | 34          | Note |
| C2 H3 N                                                            |      |             |      |
| PLAT790_ALERT_4_G Centre of Gravity not Within Unit Cell: Resd. #  |      | 35          | Note |
| C2 H3 N                                                            |      |             |      |
| PLAT790_ALERT_4_G Centre of Gravity not Within Unit Cell: Resd. #  |      | 36          | Note |
| C2 H3 N                                                            |      |             |      |
| PLAT790_ALERT_4_G Centre of Gravity not Within Unit Cell: Resd. #  |      | 37          | Note |
| C2 H3 N                                                            |      |             |      |
| PLAT790_ALERT_4_G Centre of Gravity not Within Unit Cell: Resd. #  |      | 38          | Note |
| C2 H3 N                                                            |      |             |      |
| PLAT790_ALERT_4_G Centre of Gravity not Within Unit Cell: Resd. #  |      | 39          | Note |
| C2 H3 N                                                            |      |             |      |
| PLAT790_ALERT_4_G Centre of Gravity not Within Unit Cell: Resd. #  |      | 40          | Note |
| C2 H3 N                                                            |      |             |      |
| PLAT790_ALERT_4_G Centre of Gravity not Within Unit Cell: Resd. #  |      | 41          | Note |
| C2 H3 N                                                            |      |             |      |
| PLAT790_ALERT_4_G Centre of Gravity not Within Unit Cell: Resd. #  |      | 42          | Note |
| C2 H3 N                                                            |      |             |      |
| PLAT790_ALERT_4_G Centre of Gravity not Within Unit Cell: Resd. #  |      | 43          | Note |
| C2 H3 N                                                            |      |             |      |
| PLAT790_ALERT_4_G Centre of Gravity not Within Unit Cell: Resd. #  |      | 44          | Note |
| O                                                                  |      |             |      |
| PLAT794_ALERT_5_G Tentative Bond Valency for Cu1 (I) .             | 1.16 | Info        |      |
| PLAT794_ALERT_5_G Tentative Bond Valency for Cu2 (I) .             | 1.20 | Info        |      |
| PLAT794_ALERT_5_G Tentative Bond Valency for Cu3 (II) .            | 2.13 | Info        |      |
| PLAT794_ALERT_5_G Tentative Bond Valency for Cu4 (I) .             | 1.22 | Info        |      |
| PLAT794_ALERT_5_G Tentative Bond Valency for Cu5 (I) .             | 1.16 | Info        |      |
| PLAT794_ALERT_5_G Tentative Bond Valency for Cu6 (I) .             | 1.16 | Info        |      |
| PLAT860_ALERT_3_G Number of Least-Squares Restraints .....         | 774  | Note        |      |
| PLAT883_ALERT_1_G No Info/Value for _atom_sites_solution_primary . |      | Please Do ! |      |
| PLAT910_ALERT_3_G Missing # of FCF Reflection(s) Below Theta(Min). | 1    | Note        |      |
| PLAT912_ALERT_4_G Missing # of FCF Reflections Above STh/L= 0.600  | 1621 | Note        |      |
| PLAT913_ALERT_3_G Missing # of Very Strong Reflections in FCF .... | 3    | Note        |      |
| PLAT933_ALERT_2_G Number of HKL-OMIT Records in Embedded .res File | 9    | Note        |      |
| PLAT978_ALERT_2_G Number C-C Bonds with Positive Residual Density. | 1    | Info        |      |

---

0 **ALERT level A** = Most likely a serious problem - resolve or explain  
 1 **ALERT level B** = A potentially serious problem, consider carefully  
 27 **ALERT level C** = Check. Ensure it is not caused by an omission or oversight  
 213 **ALERT level G** = General information/check it is not something unexpected

4 ALERT type 1 CIF construction/syntax error, inconsistent or missing data  
 26 ALERT type 2 Indicator that the structure model may be wrong or deficient  
 44 ALERT type 3 Indicator that the structure quality may be low  
 161 ALERT type 4 Improvement, methodology, query or suggestion  
 6 ALERT type 5 Informative message, check

---

It is advisable to attempt to resolve as many as possible of the alerts in all categories. Often the minor alerts point to easily fixed oversights, errors and omissions in your CIF or refinement strategy, so attention to these fine details can be worthwhile. In order to resolve some of the more serious problems it may be necessary to carry out additional measurements or structure refinements. However, the purpose of your study may justify the reported deviations and the more serious of these should normally be commented upon in the discussion or experimental section of a paper or in the "special\_details" fields of the CIF. checkCIF was carefully designed to identify outliers and unusual parameters, but every test has its limitations and alerts that are not important in a particular case may appear. Conversely, the absence of alerts does not guarantee there are no aspects of the results needing attention. It is up to the individual to critically assess their own results and, if necessary, seek expert advice.

### **Publication of your CIF in IUCr journals**

A basic structural check has been run on your CIF. These basic checks will be run on all CIFs submitted for publication in IUCr journals (*Acta Crystallographica*, *Journal of Applied Crystallography*, *Journal of Synchrotron Radiation*); however, if you intend to submit to *Acta Crystallographica Section C* or *E* or *IUCrData*, you should make sure that full publication checks are run on the final version of your CIF prior to submission.

### **Publication of your CIF in other journals**

Please refer to the *Notes for Authors* of the relevant journal for any special instructions relating to CIF submission.



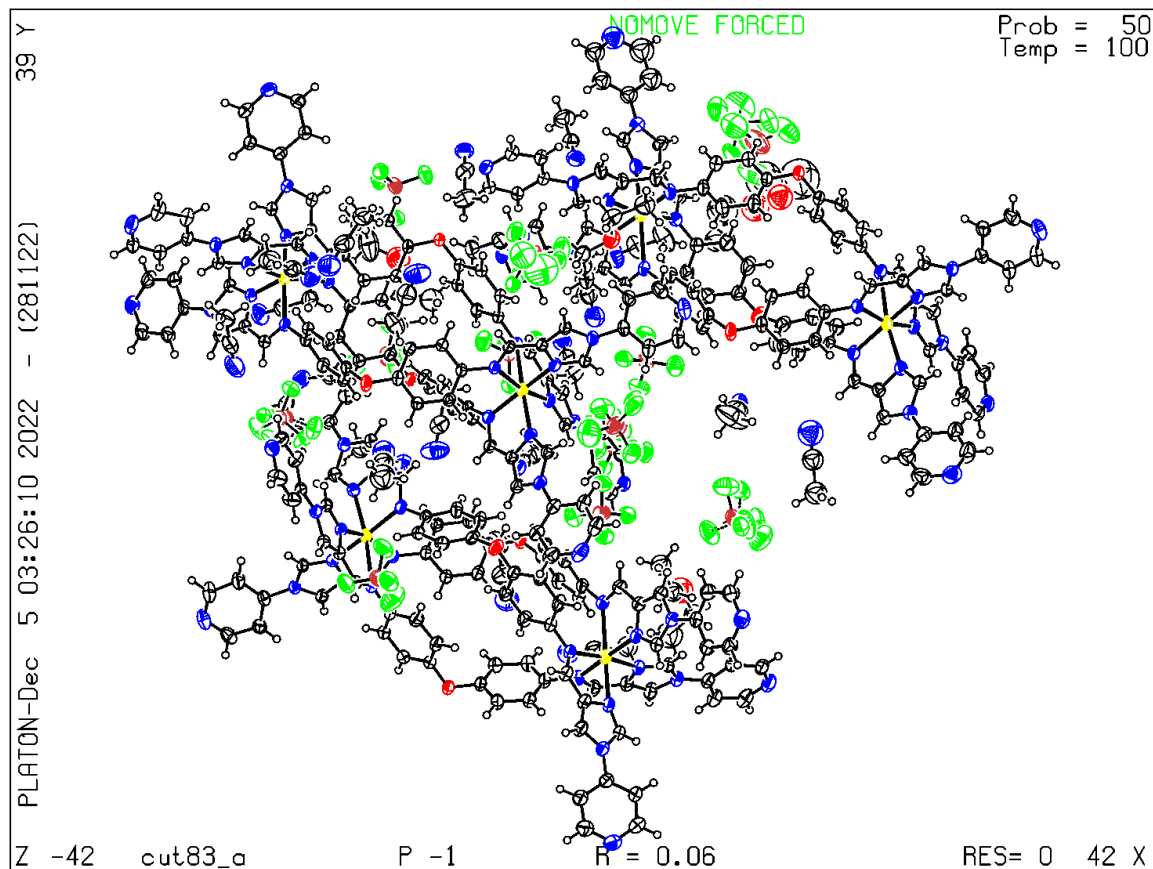

Supplement: s1 [file s1]
