# Supplementary material for: Investigating the Conformations of a Family of [M2L3]4+ Helicates Using Single Crystal X-ray Diffraction
Source: MDPI journal article supplement (doi:10.3390/molecules28031404), 2023-02-01
Supplement: s1 [file s1]

No syntax errors found.  
Please wait while processing ....

[CIF dictionary](#)  
[Interpreting this report](#)

## Datablock: cut95\_a

|                    |                                                                 |                                                                 |
|--------------------|-----------------------------------------------------------------|-----------------------------------------------------------------|
| Bond precision:    | C-C = 0.0130 Å                                                  | Wavelength=0.71073                                              |
| Cell:              | a=16.120(3)      b=17.850(4)      c=20.560(4)                   |                                                                 |
|                    | alpha=80.07(3)      beta=89.62(3)      gamma=72.86(3)           |                                                                 |
| Temperature: 100 K |                                                                 |                                                                 |
|                    | Calculated                                                      | Reported                                                        |
| Volume             | 5562(2)                                                         | 5562(2)                                                         |
| Space group        | P -1                                                            | P -1                                                            |
| Hall group         | -P 1                                                            | -P 1                                                            |
| Moiety formula     | C90 H65 N24 O3 Zn2, 4(B F4), C4 H10 O, 3(C2 H3 N), C2 N, 0.25(O | C90 H65 N24 O3 Zn2, 4(B F4), 3(C2 H3 N), C4 H10 O, C2 N, 0.25(O |
| Sum formula        | C102 H84 B4 F16 N28 O4.25 Zn2 [+ solvent]                       | C102 H84 B4 F16 N28 O4.25 Zn2                                   |
| Mr                 | 2247.99                                                         | 2247.95                                                         |
| Dx, g cm-3         | 1.342                                                           | 1.342                                                           |
| Z                  | 2                                                               | 2                                                               |
| Mu (mm-1)          | 0.521                                                           | 0.521                                                           |
| F000               | 2300.0                                                          | 2300.0                                                          |
| F000'              | 2302.24                                                         |                                                                 |
| h,k,lmax           | 16,18,21                                                        | 16,18,21                                                        |
| Nref               | 13576                                                           | 13475                                                           |
| Tmin,Tmax          | 0.901,0.990                                                     |                                                                 |
| Tmin'              | 0.901                                                           |                                                                 |
| Correction method= | Not given                                                       |                                                                 |
| Data completeness= | 0.993                                                           | Theta(max)= 21.967                                              |
| R(reflections)=    | 0.0998( 9437)                                                   | wR2(reflections)= 0.3389(13475)                                 |
| S =                | 1.397                                                           | Npar= 1632                                                      |

The following ALERTS were generated. Each ALERT has the format

**test-name\_ALERT\_alert-type\_alert-level.**

Click on the hyperlinks for more details of the test.

### Alert level A

[THETM01\\_ALERT\\_3\\_A](#) The value of sine(theta\_max)/wavelength is less than 0.550  
Calculated sin(theta\_max)/wavelength = 0.5263

**Author Response: The crystal did not diffract to high angles, so the theta\_max value is**

[PLAT201\\_ALERT\\_2\\_A](#) Isotropic non-H Atoms in Main Residue(s) ..... 12 Report  
N1C N2C N5C C1C C2C etc.

**Author Response: Orientational disorder was present in the ligand C terminal at the Zn1 of the helicate molecule. Low electron density prohibited modelling a second po but may still affect anisotropic displacements, so the isotropic modelling was u**

### Alert level C

[PLAT077\\_ALERT\\_4\\_C](#) Unitcell Contains Non-integer Number of Atoms .. Please Check  
[PLAT084\\_ALERT\\_3\\_C](#) High wR2 Value (i.e. > 0.25) ..... 0.34 Report  
[PLAT088\\_ALERT\\_3\\_C](#) Poor Data / Parameter Ratio ..... 8.26 Note  
[PLAT202\\_ALERT\\_3\\_C](#) Isotropic non-H Atoms in Anion/Solvent ..... 8 Check  
O1ET C1ET C2ET C3ET C4ET N1S3 etc.  
[PLAT234\\_ALERT\\_4\\_C](#) Large Hirshfeld Difference N5A --C22A . 0.19 Ang.  
**And 3 other PLAT234 Alerts**  
More ...  
[PLAT241\\_ALERT\\_2\\_C](#) High 'MainMol' Ueq as Compared to Neighbors of O1B Check  
**And 5 other PLAT241 Alerts**  
More ...  
[PLAT242\\_ALERT\\_2\\_C](#) Low 'MainMol' Ueq as Compared to Neighbors of C16B Check  
[PLAT244\\_ALERT\\_4\\_C](#) Low 'Solvent' Ueq as Compared to Neighbors of C1S1 Check  
[PLAT260\\_ALERT\\_2\\_C](#) Large Average Ueq of Residue Including F1A 0.160 Check  
**And 10 other PLAT260 Alerts**  
More ...  
[PLAT334\\_ALERT\\_2\\_C](#) Small <C-C> Benzene Dist. C10A -C15A . 1.36 Ang.  
[PLAT341\\_ALERT\\_3\\_C](#) Low Bond Precision on C-C Bonds ..... 0.01304 Ang.  
[PLAT360\\_ALERT\\_2\\_C](#) Short C(sp3)-C(sp3) Bond C1ET - C2ET . 1.41 Ang.

|                                   |                                                  |               |
|-----------------------------------|--------------------------------------------------|---------------|
| <a href="#">PLAT767_ALERT_4_C</a> | INS Embedded LIST 6 Instruction Should be LIST 4 | Please Check  |
| <a href="#">PLAT911_ALERT_3_C</a> | Missing FCF Refl Between Thmin & STh/L= 0.526    | 101 Report    |
| <a href="#">PLAT918_ALERT_3_C</a> | Reflection(s) with I(obs) much Smaller I(calc) . | 2 Check       |
| <a href="#">PLAT922_ALERT_1_C</a> | wR2 in the CIF and FCF Differ by .....           | -0.0039 Check |
| <a href="#">PLAT923_ALERT_1_C</a> | S Values in the CIF and FCF Differ by .....      | -0.017 Check  |
| <a href="#">PLAT934_ALERT_3_C</a> | Number of (Iobs-Icalc)/Sigma(W) > 10 Outliers .. | 1 Check       |

**Alert level G**

|                                   |                                                  |               |
|-----------------------------------|--------------------------------------------------|---------------|
| <a href="#">PLAT002_ALERT_2_G</a> | Number of Distance or Angle Restraints on AtSite | 128 Note      |
| <a href="#">PLAT003_ALERT_2_G</a> | Number of Uiso or Uij Restrained non-H Atoms ... | 6 Report      |
| <a href="#">PLAT072_ALERT_2_G</a> | SHELXL First Parameter in WGHT Unusually Large   | 0.20 Report   |
| <a href="#">PLAT154_ALERT_1_G</a> | The s.u.'s on the Cell Angles are Equal ..(Note) | 0.03 Degree   |
| <a href="#">PLAT171_ALERT_4_G</a> | The CIF-Embedded .res File Contains EADP Records | 6 Report      |
| <a href="#">PLAT172_ALERT_4_G</a> | The CIF-Embedded .res File Contains DFIX Records | 9 Report      |
| <a href="#">PLAT173_ALERT_4_G</a> | The CIF-Embedded .res File Contains DANG Records | 3 Report      |
| <a href="#">PLAT174_ALERT_4_G</a> | The CIF-Embedded .res File Contains FLAT Records | 12 Report     |
| <a href="#">PLAT176_ALERT_4_G</a> | The CIF-Embedded .res File Contains SADI Records | 121 Report    |
| <a href="#">PLAT180_ALERT_4_G</a> | Check Cell Rounding: # of Values Ending with 0 = | 3 Note        |
| <a href="#">PLAT187_ALERT_4_G</a> | The CIF-Embedded .res File Contains RIGU Records | 18 Report     |
| <a href="#">PLAT191_ALERT_3_G</a> | A Non-default SADI Restraint Value has been used | 0.0400 Report |

**And 59 other PLAT191 Alerts**

More ...

|                                   |                                                |           |
|-----------------------------------|------------------------------------------------|-----------|
| <a href="#">PLAT244_ALERT_4_G</a> | Low 'Solvent' Ueq as Compared to Neighbors of  | B2 Check  |
| <a href="#">PLAT244_ALERT_4_G</a> | Low 'Solvent' Ueq as Compared to Neighbors of  | B4 Check  |
| <a href="#">PLAT300_ALERT_4_G</a> | Atom Site Occupancy of O1W Constrained at      | 0.5 Check |
| <a href="#">PLAT301_ALERT_3_G</a> | Main Residue Disorder .....(Resd 1 )           | 22% Note  |
| <a href="#">PLAT302_ALERT_4_G</a> | Anion/Solvent/Minor-Residue Disorder (Resd 2 ) | 100% Note |

**And 10 other PLAT302 Alerts**

More ...

|                                   |                                                |            |
|-----------------------------------|------------------------------------------------|------------|
| <a href="#">PLAT304_ALERT_4_G</a> | Non-Integer Number of Atoms in ..... (Resd 2 ) | 3.25 Check |
|-----------------------------------|------------------------------------------------|------------|

**And 10 other PLAT304 Alerts**

More ...

|                                   |                                                  |             |
|-----------------------------------|--------------------------------------------------|-------------|
| <a href="#">PLAT311_ALERT_2_G</a> | Isolated Disordered Oxygen Atom (No H's ?) ..... | O1W Check   |
| <a href="#">PLAT315_ALERT_2_G</a> | Singly Bonded Carbon Detected (H-atoms Missing). | C2S4 Check  |
| <a href="#">PLAT315_ALERT_2_G</a> | Singly Bonded Carbon Detected (H-atoms Missing). | C2T4 Check  |
| <a href="#">PLAT343_ALERT_2_G</a> | Unusual sp? Angle Range in Main Residue for      | C6B Check   |
| <a href="#">PLAT411_ALERT_2_G</a> | Short Inter H...H Contact H1C ..H21D .           | 2.00 Ang.   |
|                                   | 1-x,2-y,-z =                                     | 2_675 Check |
| <a href="#">PLAT413_ALERT_2_G</a> | Short Inter XH3 .. XHn H4EB ..H2TB .             | 1.75 Ang.   |
|                                   | x,y,z =                                          | 1_555 Check |
| <a href="#">PLAT413_ALERT_2_G</a> | Short Inter XH3 .. XHn H4EC ..H2TC .             | 1.87 Ang.   |
|                                   | x,y,z =                                          | 1_555 Check |
| <a href="#">PLAT432_ALERT_2_G</a> | Short Inter X...Y Contact F12B ..C4B .           | 2.96 Ang.   |
|                                   | -1+x,y,z =                                       | 1_455 Check |
| <a href="#">PLAT432_ALERT_2_G</a> | Short Inter X...Y Contact O1F ..C24C .           | 3.02 Ang.   |
|                                   | 1-x,1-y,1-z =                                    | 2_666 Check |

**And 2 other PLAT432 Alerts**

More ...

|                                   |                                        |             |
|-----------------------------------|----------------------------------------|-------------|
|                                   | 1-x,2-y,-z =                           | 2_675 Check |
| <a href="#">PLAT432_ALERT_2_G</a> | Short Inter X...Y Contact C1C ..C21D . | 3.01 Ang.   |
|                                   | 1-x,2-y,-z =                           | 2_675 Check |
| <a href="#">PLAT432_ALERT_2_G</a> | Short Inter X...Y Contact C3C ..C12D . | 3.02 Ang.   |
|                                   | 1-x,2-y,-z =                           | 2_675 Check |
| <a href="#">PLAT432_ALERT_2_G</a> | Short Inter X...Y Contact C3C ..C13D . | 3.09 Ang.   |
|                                   | 1-x,2-y,-z =                           | 2_675 Check |
| <a href="#">PLAT432_ALERT_2_G</a> | Short Inter X...Y Contact C4C ..C12D . | 2.54 Ang.   |
|                                   | 1-x,2-y,-z =                           | 2_675 Check |
| <a href="#">PLAT432_ALERT_2_G</a> | Short Inter X...Y Contact C4C ..C11D . | 2.81 Ang.   |
|                                   | 1-x,2-y,-z =                           | 2_675 Check |
| <a href="#">PLAT432_ALERT_2_G</a> | Short Inter X...Y Contact C4C ..C13D . | 3.19 Ang.   |
|                                   | 1-x,2-y,-z =                           | 2_675 Check |
| <a href="#">PLAT432_ALERT_2_G</a> | Short Inter X...Y Contact C5C ..C12D . | 2.61 Ang.   |
|                                   | 1-x,2-y,-z =                           | 2_675 Check |
| <a href="#">PLAT432_ALERT_2_G</a> | Short Inter X...Y Contact C5C ..C11D . | 3.03 Ang.   |
|                                   | 1-x,2-y,-z =                           | 2_675 Check |

**And 3 other PLAT432 Alerts**

More ...

|                                   |                                                  |             |
|-----------------------------------|--------------------------------------------------|-------------|
|                                   | 1-x,2-y,1-z =                                    | 2_676 Check |
| <a href="#">PLAT605_ALERT_4_G</a> | Largest Solvent Accessible VOID in the Structure | 463 A**3    |
| <a href="#">PLAT720_ALERT_4_G</a> | Number of Unusual/Non-Standard Labels .....      | 51 Note     |
| <a href="#">PLAT722_ALERT_1_G</a> | Angle Calc 121.00, Rep 119.90 Dev...             | 1.10 Degree |
|                                   | C17D -C18D -H18D 1_555 1_555 1_555 #             | 468 Check   |
| <a href="#">PLAT790_ALERT_4_G</a> | Centre of Gravity not Within Unit Cell: Resd. #  | 5 Note      |
|                                   | B F4                                             |             |

**And 2 other PLAT790 Alerts**

More ...

|                                   |                                                  |        |
|-----------------------------------|--------------------------------------------------|--------|
| <a href="#">PLAT802_ALERT_4_G</a> | CIF Input Record(s) with more than 80 Characters | 4 Info |
| <a href="#">PLAT811_ALERT_5_G</a> | No ADDSYM Analysis: Too Many Excluded Atoms .... | ! Info |

|                                   |                                                  |      |             |
|-----------------------------------|--------------------------------------------------|------|-------------|
| <a href="#">PLAT860 ALERT 3 G</a> | Number of Least-Squares Restraints .....         | 1093 | Note        |
| <a href="#">PLAT868 ALERT 4 G</a> | ALERTS Due to the Use of _smtbx_masks Suppressed |      | ! Info      |
| <a href="#">PLAT883 ALERT 1 G</a> | No Info/Value for _atom_sites_solution_primary . |      | Please Do ! |
| <a href="#">PLAT909 ALERT 3 G</a> | Percentage of I>2sig(I) Data at Theta(Max) Still | 34%  | Note        |
| <a href="#">PLAT978 ALERT 2 G</a> | Number C-C Bonds with Positive Residual Density. | 0    | Info        |

---

2 **ALERT level A** = Most likely a serious problem - resolve or explain  
 0 **ALERT level B** = A potentially serious problem, consider carefully  
 36 **ALERT level C** = Check. Ensure it is not caused by an omission or oversight  
 132 **ALERT level G** = General information/check it is not something unexpected

5 ALERT type 1 CIF construction/syntax error, inconsistent or missing data  
 47 ALERT type 2 Indicator that the structure model may be wrong or deficient  
 71 ALERT type 3 Indicator that the structure quality may be low  
 46 ALERT type 4 Improvement, methodology, query or suggestion  
 1 ALERT type 5 Informative message, check

---

It is advisable to attempt to resolve as many as possible of the alerts in all categories. Often the minor alerts point to easily fixed oversights, errors and omissions in your CIF or refinement strategy, so attention to these fine details can be worthwhile. In order to resolve some of the more serious problems it may be necessary to carry out additional measurements or structure refinements. However, the purpose of your study may justify the reported deviations and the more serious of these should normally be commented upon in the discussion or experimental section of a paper or in the "special\_details" fields of the CIF. checkCIF was carefully designed to identify outliers and unusual parameters, but every test has its limitations and alerts that are not important in a particular case may appear. Conversely, the absence of alerts does not guarantee there are no aspects of the results needing attention. It is up to the individual to critically assess their own results and, if necessary, seek expert advice.

### Publication of your CIF in IUCr journals

A basic structural check has been run on your CIF. These basic checks will be run on all CIFs submitted for publication in IUCr journals (*Acta Crystallographica*, *Journal of Applied Crystallography*, *Journal of Synchrotron Radiation*); however, if you intend to submit to *Acta Crystallographica Section C* or *E* or *IUCrData*, you should make sure that [full publication checks](#) are run on the final version of your CIF prior to submission.

### Publication of your CIF in other journals

Please refer to the *Notes for Authors* of the relevant journal for any special instructions relating to CIF submission.

---

PLATON version of 28/11/2022; check.def file version of 28/11/2022

## Datablock cut95\_a - ellipsoid plot

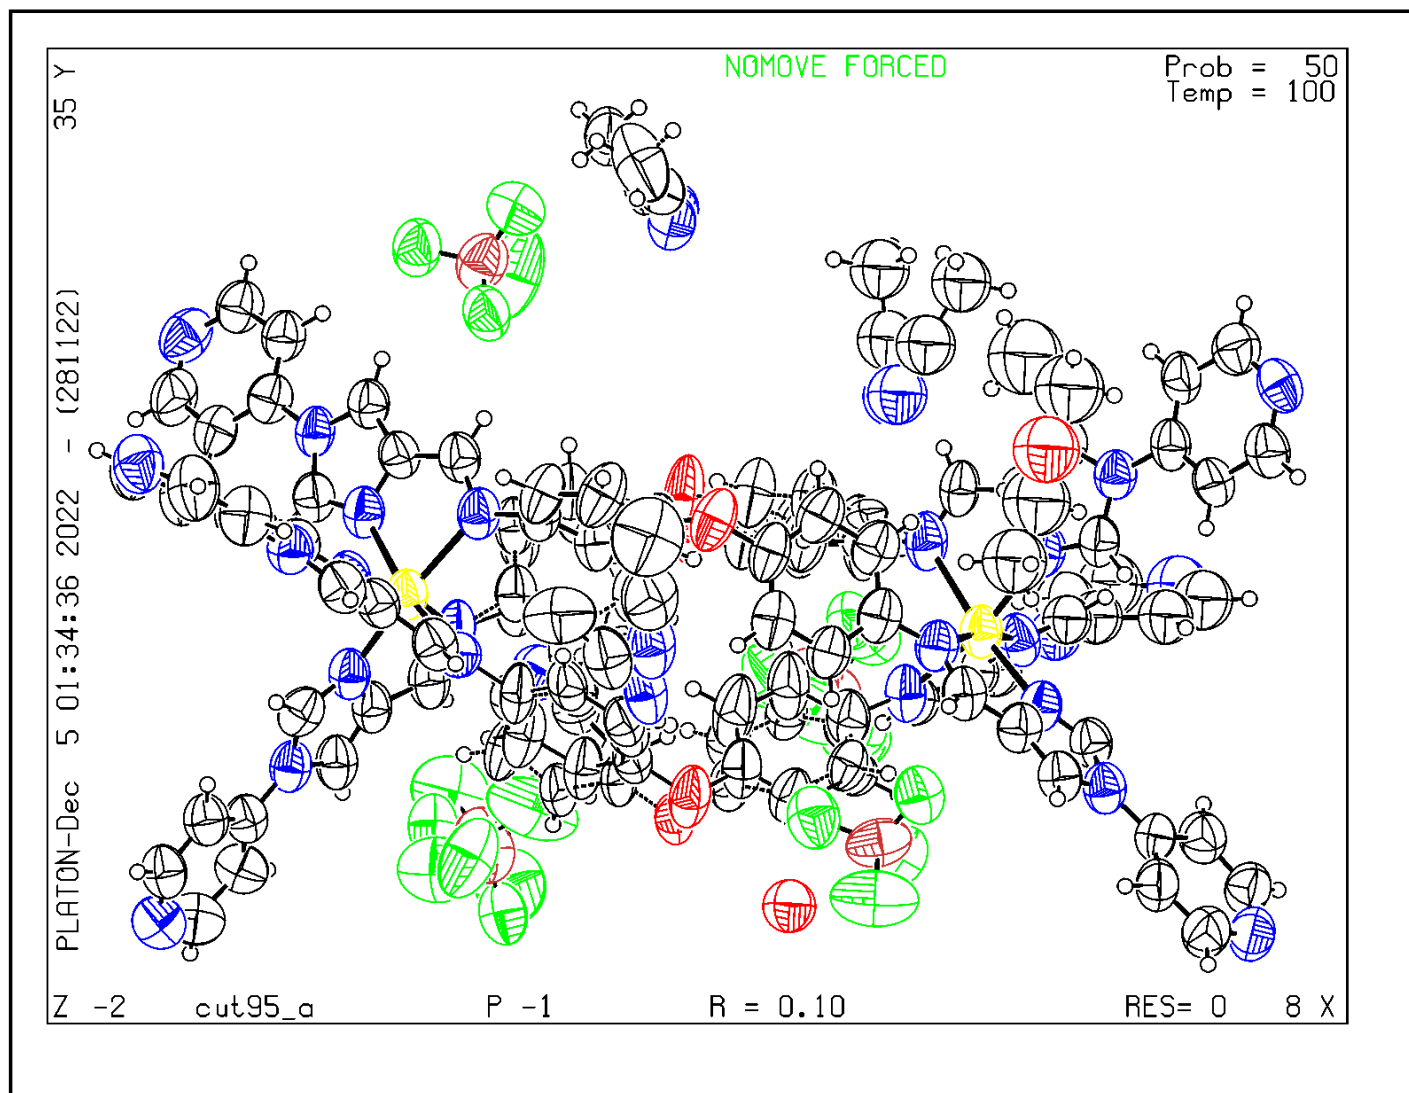

[Download CIF editor \(publCIF\) from the IUCr](#)  
[Download CIF editor \(enCIFer\) from the CCDC](#)  
[Test a new CIF entry](#)
