# Supplementary material for: Investigating the Conformations of a Family of [M2L3]4+ Helicates Using Single Crystal X-ray Diffraction
Source: MDPI journal article supplement (doi:10.3390/molecules28031404), 2023-02-01
Supplement: s1 [file s1]

No syntax errors found.  
Please wait while processing ....

[CIF dictionary](#)  
[Interpreting this report](#)

## Datablock: cut83\_a

|                    |                                                                 |                                                                 |
|--------------------|-----------------------------------------------------------------|-----------------------------------------------------------------|
| Bond precision:    | C-C = 0.0075 Å                                                  | Wavelength=0.71073                                              |
| Cell:              | a=16.060(3) b=17.710(4) c=20.570(4)                             |                                                                 |
|                    | alpha=80.35(3) beta=89.76(3) gamma=72.80(3)                     |                                                                 |
| Temperature:       | 100 K                                                           |                                                                 |
|                    | Calculated                                                      | Reported                                                        |
| Volume             | 5503(2)                                                         | 5503(2)                                                         |
| Space group        | P -1                                                            | P -1                                                            |
| Hall group         | -P 1                                                            | -P 1                                                            |
| Moiety formula     | 2(C90 H66 Co2 N24 O3), 8(B F4), 2.667(C4 O), 6(C2 H3 N), C2 N [ | C90 H66 Co2 N24 O3, 4(B F4), 3(C2 H3 N), 1.333(C4 O), 0.5(C2 N) |
| Sum formula        | C204.67 H150 B8 Co4 F32 N55 O8.67 [+ solvent]                   | C102.34 H75 B4 Co2 F16 N27.50 O4.34                             |
| Mr                 | 4448.66                                                         | 2224.37                                                         |
| Dx, g cm-3         | 1.342                                                           | 1.342                                                           |
| Z                  | 1                                                               | 2                                                               |
| Mu (mm-1)          | 0.392                                                           | 0.392                                                           |
| F000               | 2268.3                                                          | 2268.0                                                          |
| F000'              | 2270.84                                                         |                                                                 |
| h,k,lmax           | 19,21,24                                                        | 19,21,24                                                        |
| Nref               | 20165                                                           | 19708                                                           |
| Tmin,Tmax          | 0.910,0.992                                                     |                                                                 |
| Tmin'              | 0.889                                                           |                                                                 |
| Correction method= | Not given                                                       |                                                                 |
| Data completeness= | 0.977                                                           | Theta(max)= 25.350                                              |
| R(reflections)=    | 0.0914( 15394)                                                  | wR2(reflections)= 0.2925( 19708)                                |
| S =                | 1.044                                                           | Npar= 1727                                                      |

The following ALERTS were generated. Each ALERT has the format

**test-name\_ALERT\_alert-type\_alert-level.**

Click on the hyperlinks for more details of the test.

### Alert level A

[PLAT201\\_ALERT\\_2\\_A](#) Isotropic non-H Atoms in Main Residue(s) ..... 11 Report  
N1C N2C C1C C2C C3C etc.

**Author Response: Orientational disorder was present in the ligand C terminal at the Co1 of the helicate molecule. Low electron density prohibited modelling a second po but may still affect anisotropic displacements, so the isotropic modelling was u**

### Alert level C

[PLAT077\\_ALERT\\_4\\_C](#) Unitcell Contains Non-integer Number of Atoms .. Please Check  
[PLAT084\\_ALERT\\_3\\_C](#) High wR2 Value (i.e. > 0.25) ..... 0.29 Report  
[PLAT202\\_ALERT\\_3\\_C](#) Isotropic non-H Atoms in Anion/Solvent ..... 8 Check  
O1ET C1ET C2ET C3ET C4ET N1S4 etc.  
[PLAT234\\_ALERT\\_4\\_C](#) Large Hirshfeld Difference C19A --C20A . 0.16 Ang.  
[PLAT241\\_ALERT\\_2\\_C](#) High 'MainMol' Ueq as Compared to Neighbors of C21B Check  
[PLAT242\\_ALERT\\_2\\_C](#) Low 'MainMol' Ueq as Compared to Neighbors of C16B Check  
[PLAT244\\_ALERT\\_4\\_C](#) Low 'Solvent' Ueq as Compared to Neighbors of C1S1 Check  
[PLAT260\\_ALERT\\_2\\_C](#) Large Average Ueq of Residue Including F1A 0.129 Check  
**And 6 other PLAT260 Alerts**  
More ...  
[PLAT334\\_ALERT\\_2\\_C](#) Small <C-C> Benzene Dist. C10A -C15A . 1.36 Ang.  
[PLAT341\\_ALERT\\_3\\_C](#) Low Bond Precision on C-C Bonds ..... 0.00749 Ang.  
[PLAT767\\_ALERT\\_4\\_C](#) INS Embedded LIST 6 Instruction Should be LIST 4 Please Check  
[PLAT906\\_ALERT\\_3\\_C](#) Large K Value in the Analysis of Variance ..... 3.264 Check  
[PLAT911\\_ALERT\\_3\\_C](#) Missing FCF Refl Between Thmin & STh/L= 0.600 398 Report  
[PLAT918\\_ALERT\\_3\\_C](#) Reflection(s) with I(obs) much Smaller I(calc) . 4 Check  
[PLAT922\\_ALERT\\_1\\_C](#) wR2 in the CIF and FCF Differ by ..... -0.0021 Check  
[PLAT975\\_ALERT\\_2\\_C](#) Check Calcd Resid. Dens. 1.07Ang From C3ET . 0.58 eA-3

### Alert level G

[PLAT002\\_ALERT\\_2\\_G](#) Number of Distance or Angle Restraints on AtSite 133 Note  
[PLAT041\\_ALERT\\_1\\_G](#) Calc. and Reported SumFormula Strings Differ Please Check  
[PLAT042\\_ALERT\\_1\\_G](#) Calc. and Reported MoietyFormula Strings Differ Please Check

|                                    |                                                  |             |        |
|------------------------------------|--------------------------------------------------|-------------|--------|
| <a href="#">PLAT045_ALERT_1_G</a>  | Calculated and Reported Z Differ by a Factor ... | 0.500       | Check  |
| <a href="#">PLAT072_ALERT_2_G</a>  | SHELXL First Parameter in WGHT Unusually Large   | 0.19        | Report |
| <a href="#">PLAT154_ALERT_1_G</a>  | The s.u.'s on the Cell Angles are Equal ..(Note) | 0.03        | Degree |
| <a href="#">PLAT172_ALERT_4_G</a>  | The CIF-Embedded .res File Contains DFIX Records | 8           | Report |
| <a href="#">PLAT173_ALERT_4_G</a>  | The CIF-Embedded .res File Contains DANG Records | 8           | Report |
| <a href="#">PLAT174_ALERT_4_G</a>  | The CIF-Embedded .res File Contains FLAT Records | 10          | Report |
| <a href="#">PLAT176_ALERT_4_G</a>  | The CIF-Embedded .res File Contains SADI Records | 148         | Report |
| <a href="#">PLAT180_ALERT_4_G</a>  | Check Cell Rounding: # of Values Ending with 0 = | 4           | Note   |
| <a href="#">PLAT187_ALERT_4_G</a>  | The CIF-Embedded .res File Contains RIGU Records | 19          | Report |
| <a href="#">PLAT191_ALERT_3_G</a>  | A Non-default SADI Restraint Value has been used | 0.0400      | Report |
| <b>And 74 other PLAT191 Alerts</b> |                                                  |             |        |
| More ...                           |                                                  |             |        |
| <a href="#">PLAT244_ALERT_4_G</a>  | Low 'Solvent' Ueq as Compared to Neighbors of    | B2          | Check  |
| <a href="#">PLAT300_ALERT_4_G</a>  | Atom Site Occupancy of 04 Constrained at         | 0.3333      | Check  |
| <b>And 7 other PLAT300 Alerts</b>  |                                                  |             |        |
| More ...                           |                                                  |             |        |
| <a href="#">PLAT301_ALERT_3_G</a>  | Main Residue Disorder .....(Resd 1 )             | 27%         | Note   |
| <a href="#">PLAT302_ALERT_4_G</a>  | Anion/Solvent/Minor-Residue Disorder (Resd 2 )   | 100%        | Note   |
| <b>And 13 other PLAT302 Alerts</b> |                                                  |             |        |
| More ...                           |                                                  |             |        |
| <a href="#">PLAT304_ALERT_4_G</a>  | Non-Integer Number of Atoms in ..... (Resd 2 )   | 2.75        | Check  |
| <b>And 13 other PLAT304 Alerts</b> |                                                  |             |        |
| More ...                           |                                                  |             |        |
| <a href="#">PLAT315_ALERT_2_G</a>  | Singly Bonded Carbon Detected (H-atoms Missing). | C1ET        | Check  |
| <b>And 6 other PLAT315 Alerts</b>  |                                                  |             |        |
| More ...                           |                                                  |             |        |
| <a href="#">PLAT410_ALERT_2_G</a>  | Short Intra H...H Contact H7C ..H4F .            | 1.95        | Ang.   |
|                                    | x,y,z =                                          | 1_555       | Check  |
| <a href="#">PLAT432_ALERT_2_G</a>  | Short Inter X...Y Contact F12B ..C4B .           | 2.91        | Ang.   |
|                                    | 1+x,y,z =                                        | 1_655       | Check  |
| <a href="#">PLAT432_ALERT_2_G</a>  | Short Inter X...Y Contact O1F ..C24C .           | 3.00        | Ang.   |
|                                    | 1-x,1-y,-z =                                     | 2_665       | Check  |
| <a href="#">PLAT605_ALERT_4_G</a>  | Largest Solvent Accessible VOID in the Structure | 103         | A**3   |
| <a href="#">PLAT720_ALERT_4_G</a>  | Number of Unusual/Non-Standard Labels .....      | 43          | Note   |
| <a href="#">PLAT789_ALERT_4_G</a>  | Atoms with Negative _atom_site_disorder_group #  | 5           | Check  |
| <a href="#">PLAT790_ALERT_4_G</a>  | Centre of Gravity not Within Unit Cell: Resd. #  | 5           | Note   |
| B F4                               |                                                  |             |        |
| <b>And 3 other PLAT790 Alerts</b>  |                                                  |             |        |
| More ...                           |                                                  |             |        |
| <a href="#">PLAT802_ALERT_4_G</a>  | CIF Input Record(s) with more than 80 Characters | 3           | Info   |
| <a href="#">PLAT811_ALERT_5_G</a>  | No ADDSYM Analysis: Too Many Excluded Atoms .... | !           | Info   |
| <a href="#">PLAT860_ALERT_3_G</a>  | Number of Least-Squares Restraints .....         | 1021        | Note   |
| <a href="#">PLAT868_ALERT_4_G</a>  | ALERTS Due to the Use of _smtbx_masks Suppressed | !           | Info   |
| <a href="#">PLAT883_ALERT_1_G</a>  | No Info/Value for _atom_sites_solution_primary . | Please Do ! |        |
| <a href="#">PLAT912_ALERT_4_G</a>  | Missing # of FCF Reflections Above STh/L= 0.600  | 59          | Note   |
| <a href="#">PLAT933_ALERT_2_G</a>  | Number of HKL-OMIT Records in Embedded .res File | 1           | Note   |
| <a href="#">PLAT978_ALERT_2_G</a>  | Number C-C Bonds with Positive Residual Density. | 3           | Info   |

1 **ALERT level A** = Most likely a serious problem - resolve or explain  
0 **ALERT level B** = A potentially serious problem, consider carefully  
22 **ALERT level C** = Check. Ensure it is not caused by an omission or oversight  
150 **ALERT level G** = General information/check it is not something unexpected

6 **ALERT type 1** CIF construction/syntax error, inconsistent or missing data  
26 **ALERT type 2** Indicator that the structure model may be wrong or deficient  
83 **ALERT type 3** Indicator that the structure quality may be low  
57 **ALERT type 4** Improvement, methodology, query or suggestion  
1 **ALERT type 5** Informative message, check

It is advisable to attempt to resolve as many as possible of the alerts in all categories. Often the minor alerts point to easily fixed oversights, errors and omissions in your CIF or refinement strategy, so attention to these fine details can be worthwhile. In order to resolve some of the more serious problems it may be necessary to carry out additional measurements or structure refinements. However, the purpose of your study may justify the reported deviations and the more serious of these should normally be commented upon in the discussion or experimental section of a paper or in the "special\_details" fields of the CIF. checkCIF was carefully designed to identify outliers and unusual parameters, but every test has its limitations and alerts that are not important in a particular case may appear. Conversely, the absence of alerts does not guarantee there are no aspects of the results needing attention. It is up to the individual to critically assess their own results and, if necessary, seek expert advice.

### Publication of your CIF in IUCr journals

A basic structural check has been run on your CIF. These basic checks will be run on all CIFs submitted for publication in IUCr journals (*Acta Crystallographica*, *Journal of Applied Crystallography*, *Journal of Synchrotron Radiation*); however, if you intend to submit to *Acta Crystallographica Section C* or *E* or *IUCrData*, you should make sure that [full publication checks](#) are run on the final version of your CIF prior to submission.

### Publication of your CIF in other journals

Please refer to the *Notes for Authors* of the relevant journal for any special instructions relating to CIF submission.

PLATON version of 28/11/2022; check.def file version of 28/11/2022

### Datablock cut83\_a - ellipsoid plot

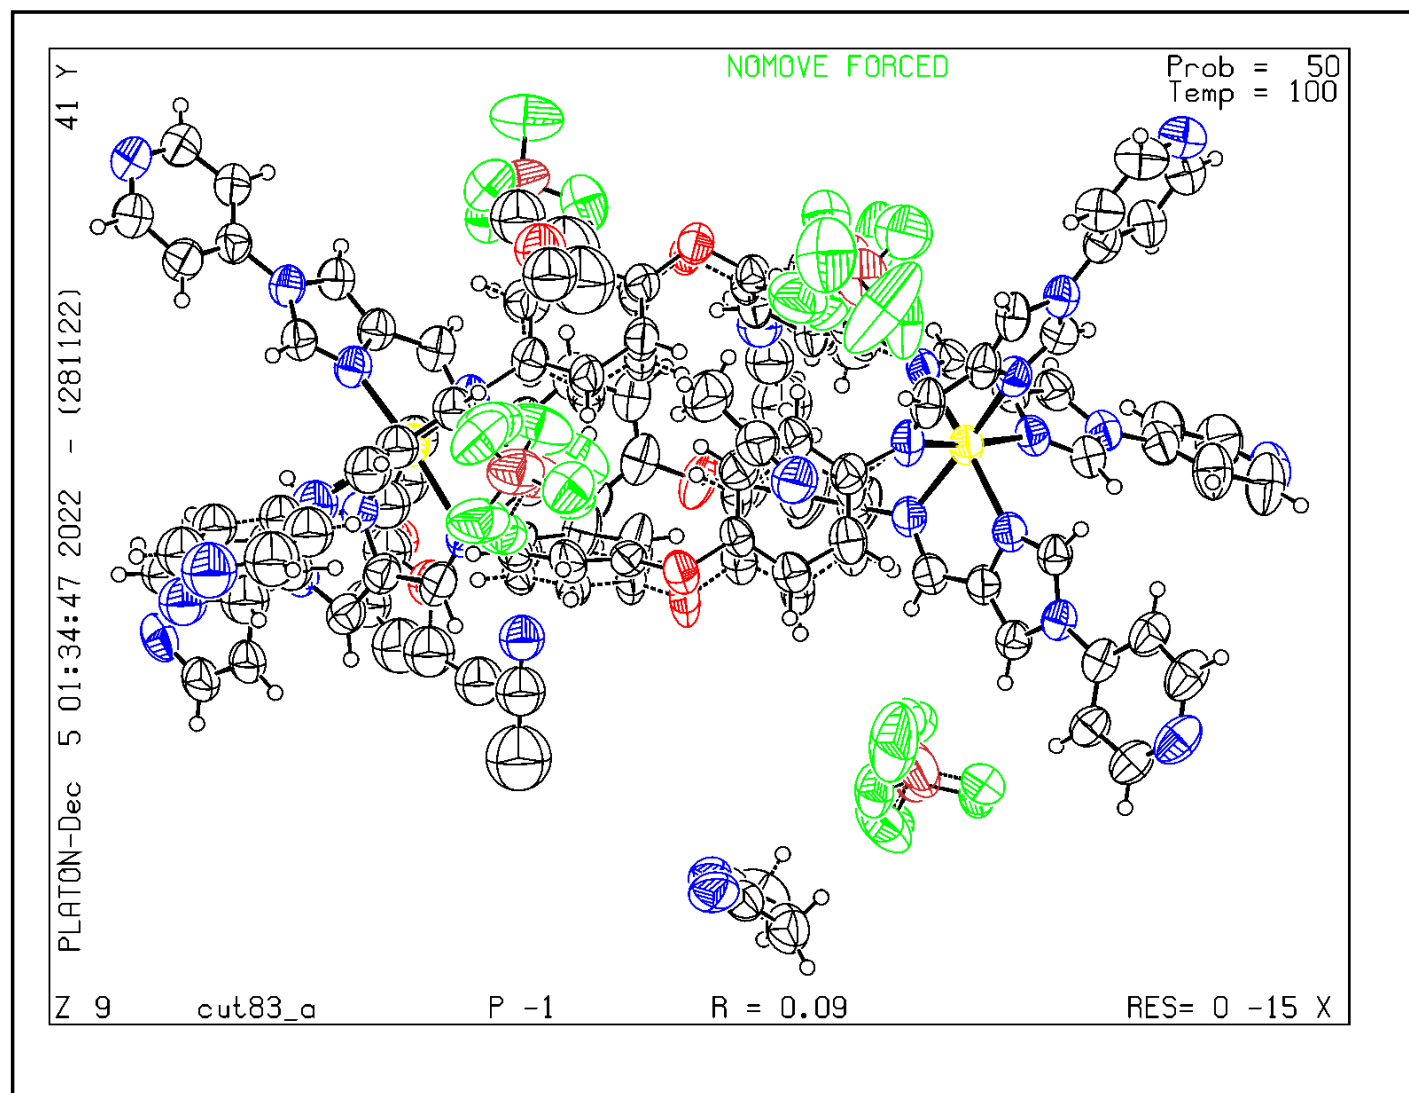

[Download CIF editor \(publCIF\) from the IUCr](#)  
[Download CIF editor \(enCIFer\) from the CCDC](#)  
[Test a new CIF entry.](#)
