# Supplementary material for: Investigating the Conformations of a Family of [M2L3]4+ Helicates Using Single Crystal X-ray Diffraction
Source: MDPI journal article supplement (doi:10.3390/molecules28031404), 2023-02-01
Supplement: s1 [file s1]

No syntax errors found.  
Please wait while processing ....

[CIF dictionary](#)  
[Interpreting this report](#)

## Datablock: mn

|                    |                                                                 |                                                                 |
|--------------------|-----------------------------------------------------------------|-----------------------------------------------------------------|
| Bond precision:    | C-C = 0.0094 Å                                                  | Wavelength=0.71073                                              |
| Cell:              | a=16.060(3)      b=18.190(4)      c=20.480(4)                   |                                                                 |
|                    | alpha=79.38(3)      beta=88.85(3)      gamma=73.39(3)           |                                                                 |
| Temperature: 100 K |                                                                 |                                                                 |
|                    | Calculated                                                      | Reported                                                        |
| Volume             | 5632(2)                                                         | 5632(2)                                                         |
| Space group        | P -1                                                            | P -1                                                            |
| Hall group         | -P 1                                                            | -P 1                                                            |
| Moiety formula     | 2(C90 H65 Mn2 N24 O3), 8(C1 O4), 3(C4 O), 7(C2 H3 N), 2(C2 N) [ | C90 H66 Mn2 N24 O3, 4(C1 O4), C4 H10 O, 4.5(C2 H3 N), 0.5(C4 O) |
| Sum formula        | C210 H151 Cl8 Mn4 N57 O41 [+ solvent]                           | C105 H75.50 Cl4 Mn2 N28.50 O20.50                               |
| Mr                 | 4632.24                                                         | 2316.11                                                         |
| Dx, g cm-3         | 1.366                                                           | 1.366                                                           |
| Z                  | 1                                                               | 2                                                               |
| Mu (mm-1)          | 0.399                                                           | 0.399                                                           |
| F000               | 2374.0                                                          | 2374.0                                                          |
| F000'              | 2377.48                                                         |                                                                 |
| h,k,lmax           | 18,21,24                                                        | 18,21,24                                                        |
| Nref               | 19195                                                           | 18961                                                           |
| Tmin,Tmax          | 0.923,0.992                                                     |                                                                 |
| Tmin'              | 0.923                                                           |                                                                 |
| Correction method= | Not given                                                       |                                                                 |
| Data completeness= | 0.988                                                           | Theta(max)= 24.712                                              |
| R(reflections)=    | 0.1100( 14564)                                                  | wR2(reflections)= 0.3776( 18961)                                |
| S =                | 1.671                                                           | Npar= 1862                                                      |

The following ALERTS were generated. Each ALERT has the format

**test-name\_ALERT\_alert-type\_alert-level.**

Click on the hyperlinks for more details of the test.

### Alert level A

[PLAT201\\_ALERT\\_2\\_A](#) Isotropic non-H Atoms in Main Residue(s) ..... 11 Report  
N1C      N2C      C1C      C2C      C3C      etc.

**Author Response: Weak high-angle reflections result in high Rint. This affects refine parameters wR2, lowers bond precision and probably does not describe anisotropic displacements correctly. Orientational disorder in the helicate may give rise to some reflections which are not compatible with the assignment of Bravais lattice Orientational disorder in the terminal pyridine of ligand C and the associated chelating imidazoleimine moiety could not be satisfactorily modelled with anisotropic displacement parameters.**

### Alert level B

[PLAT084\\_ALERT\\_3\\_B](#) High wR2 Value (i.e. > 0.25) ..... 0.38 Report

**Author Response: Weak high-angle reflections result in high Rint. This affects refine parameters wR2, lowers bond precision and probably does not describe anisotropic displacements correctly. Orientational disorder in the helicate may give rise to some reflections which are not compatible with the assignment of Bravais lattice**

[PLAT315\\_ALERT\\_2\\_B](#) Singly Bonded Carbon Detected (H-atoms Missing). C1ET Check

**Author Response: Orientational disorder in some solvent molecules prevented anisotropic modelling, and in some cases hydrogen atoms were not fixed to allow the shift to converge to zero.**

[PLAT315\\_ALERT\\_2\\_B](#) Singly Bonded Carbon Detected (H-atoms Missing). C4ET Check  
[PLAT934\\_ALERT\\_3\\_B](#) Number of (Iobs-Icalc)/Sigma(W) > 10 Outliers .. 4 Check

**Author Response: Weak high-angle reflections result in high Rint. This affects refine parameters wR2, lowers bond precision and probably does not describe anisotropic**

**displacements correctly. Orientational disorder in the helicate may give rise to some reflections which are not compatible with the assignment of Bravais lattice**

### Alert level C

[THETM01\\_ALERT\\_3\\_C](#) The value of  $\sin(\theta_{\max})/\lambda$  is less than 0.590  
Calculated  $\sin(\theta_{\max})/\lambda = 0.5882$

[PLAT082\\_ALERT\\_2\\_C](#) High R1 Value ..... 0.11 Report

[PLAT202\\_ALERT\\_3\\_C](#) Isotropic non-H Atoms in Anion/Solvent ..... 13 Check

[PLAT220\\_ALERT\\_2\\_C](#) NonSolvent Resd 1 C Ueq(max)/Ueq(min) Range ..... 3.3 Ratio

[PLAT234\\_ALERT\\_4\\_C](#) Large Hirshfeld Difference O1D --C16D ..... 0.18 Ang.

[PLAT241\\_ALERT\\_2\\_C](#) High 'MainMol' Ueq as Compared to Neighbors of ..... N4A Check

**And 3 other PLAT241 Alerts**

More ...

[PLAT242\\_ALERT\\_2\\_C](#) Low 'MainMol' Ueq as Compared to Neighbors of ..... C28C Check

[PLAT244\\_ALERT\\_4\\_C](#) Low 'Solvent' Ueq as Compared to Neighbors of ..... C3ET Check

**And 2 other PLAT244 Alerts**

More ...

[PLAT260\\_ALERT\\_2\\_C](#) Large Average Ueq of Residue Including C11G ..... 0.159 Check

**And 5 other PLAT260 Alerts**

More ...

[PLAT334\\_ALERT\\_2\\_C](#) Small <C-C> Benzene Dist. C16E -C21E ..... 1.37 Ang.

[PLAT341\\_ALERT\\_3\\_C](#) Low Bond Precision on C-C Bonds ..... 0.00936 Ang.

[PLAT906\\_ALERT\\_3\\_C](#) Large K Value in the Analysis of Variance ..... 4.452 Check

[PLAT911\\_ALERT\\_3\\_C](#) Missing FCF Refl Between Thmin & STh/L= 0.588 ..... 234 Report

[PLAT918\\_ALERT\\_3\\_C](#) Reflection(s) with I(obs) much Smaller I(calc) ..... 20 Check

[PLAT922\\_ALERT\\_1\\_C](#) wR2 in the CIF and FCF Differ by ..... -0.0011 Check

[PLAT975\\_ALERT\\_2\\_C](#) Check Calcd Resid. Dens. 0.91Ang From C1ET ..... 0.77 eA-3

### Alert level G

[FORMU01\\_ALERT\\_1\\_G](#) There is a discrepancy between the atom counts in the  
\_chemical\_formula\_sum and \_chemical\_formula\_moiety. This is  
usually due to the moiety formula being in the wrong format.  
Atom count from \_chemical\_formula\_sum: C105 H75.5 Cl4 Mn2 N28.5 O20.  
Atom count from \_chemical\_formula\_moiety: C105 H89.5 Cl4 Mn2 N28.5 O20.

[PLAT002\\_ALERT\\_2\\_G](#) Number of Distance or Angle Restraints on AtSite ..... 178 Note

[PLAT042\\_ALERT\\_1\\_G](#) Calc. and Reported MoietyFormula Strings Differ ..... Please Check

[PLAT045\\_ALERT\\_1\\_G](#) Calculated and Reported Z Differ by a Factor ... 0.500 Check

[PLAT072\\_ALERT\\_2\\_G](#) SHELXL First Parameter in WGHT Unusually Large ..... 0.20 Report

[PLAT154\\_ALERT\\_1\\_G](#) The s.u.'s on the Cell Angles are Equal ..(Note) ..... 0.03 Degree

[PLAT171\\_ALERT\\_4\\_G](#) The CIF-Embedded .res File Contains EADP Records ..... 1 Report

[PLAT172\\_ALERT\\_4\\_G](#) The CIF-Embedded .res File Contains DFIX Records ..... 17 Report

[PLAT173\\_ALERT\\_4\\_G](#) The CIF-Embedded .res File Contains DANG Records ..... 10 Report

[PLAT174\\_ALERT\\_4\\_G](#) The CIF-Embedded .res File Contains FLAT Records ..... 28 Report

[PLAT176\\_ALERT\\_4\\_G](#) The CIF-Embedded .res File Contains SADI Records ..... 213 Report

[PLAT180\\_ALERT\\_4\\_G](#) Check Cell Rounding: # of Values Ending with 0 = ..... 3 Note

[PLAT187\\_ALERT\\_4\\_G](#) The CIF-Embedded .res File Contains RIGU Records ..... 30 Report

[PLAT191\\_ALERT\\_3\\_G](#) A Non-default SADI Restraint Value has been used ..... 0.0400 Report

**And 100 other PLAT191 Alerts**

More ...

[PLAT244\\_ALERT\\_4\\_G](#) Low 'Solvent' Ueq as Compared to Neighbors of ..... C11G Check

[PLAT244\\_ALERT\\_4\\_G](#) Low 'Solvent' Ueq as Compared to Neighbors of ..... C12G Check

[PLAT300\\_ALERT\\_4\\_G](#) Atom Site Occupancy of O1EV Constrained at ..... 0.5 Check

**And 10 other PLAT300 Alerts**

More ...

[PLAT301\\_ALERT\\_3\\_G](#) Main Residue Disorder .....(Resd 1 ) ..... 48% Note

[PLAT302\\_ALERT\\_4\\_G](#) Anion/Solvent/Minor-Residue Disorder (Resd 4 ) ..... 100% Note

**And 9 other PLAT302 Alerts**

More ...

[PLAT304\\_ALERT\\_4\\_G](#) Non-Integer Number of Atoms in ..... (Resd 5 ) ..... 3.40 Check

**And 6 other PLAT304 Alerts**

More ...

[PLAT315\\_ALERT\\_2\\_G](#) Singly Bonded Carbon Detected (H-atoms Missing). ..... C1EV Check

**Author Response: Orientational disorder in some solvent molecules prevented anisotropic modelling, and in some cases hydrogen atoms were not fixed to allow the shift to converge to zero.**

### And 3 other PLAT315 Alerts

More ...

[PLAT343\\_ALERT\\_2\\_G](#) Unusual sp? Angle Range in Main Residue for ..... C9A Check

[PLAT344\\_ALERT\\_2\\_G](#) Unusual sp? Angle Range in Solvent/Ion for ..... C1ET Check

**And 3 other PLAT344 Alerts**

More ...

[PLAT410\\_ALERT\\_2\\_G](#) Short Intra H...H Contact H24A ..H27D ..... 1.93 Ang.

x,y,z = 1\_555 Check

More ...

### And 2 other PLAT432 Alerts

More ...

```

1  ALERT level A = Most likely a serious problem - resolve or explain
4  ALERT level B = A potentially serious problem, consider carefully
26 ALERT level C = Check. Ensure it is not caused by an omission or oversight
173 ALERT level G = General information/check it is not something unexpected

5  ALERT type 1 CIF construction/syntax error, inconsistent or missing data
39 ALERT type 2 Indicator that the structure model may be wrong or deficient
112 ALERT type 3 Indicator that the structure quality may be low
47  ALERT type 4 Improvement, methodology, query or suggestion
1  ALERT type 5 Informative message, check

```

It is advisable to attempt to resolve as many as possible of the alerts in all categories. Often the minor alerts point to easily fixed oversights, errors and omissions in your CIF or refinement strategy, so attention to these fine details can be worthwhile. In order to resolve some of the more serious problems it may be necessary to carry out additional measurements or structure refinements. However, the purpose of your study may justify the reported deviations and the more serious of these should normally be commented upon in the discussion or experimental section of a paper or in the "special\_details" fields of the CIF. checkCIF was carefully designed to identify outliers and unusual parameters, but every test has its limitations and alerts that are not important in a particular case may appear. Conversely, the absence of alerts does not guarantee there are no aspects of the results needing attention. It is up to the individual to critically assess their own results and, if necessary, seek expert advice.

## Publication of your CIF in IUCr journals

A basic structural check has been run on your CIF. These basic checks will be run on all CIFs submitted for publication in IUCr journals (*Acta Crystallographica*, *Journal of Applied Crystallography*, *Journal of Synchrotron Radiation*); however, if you intend to submit to *Acta Crystallographica Section C* or *E* or *IUCrData*, you should make sure that [full publication checks](#) are run on the final version of your CIF prior to submission.

## Publication of your CIF in other journals

Please refer to the *Notes for Authors* of the relevant journal for any special instructions relating to CIF submission.

**PLATON version of 28/11/2022; check.def file version of 28/11/2022**

### Datablock mn - ellipsoid plot

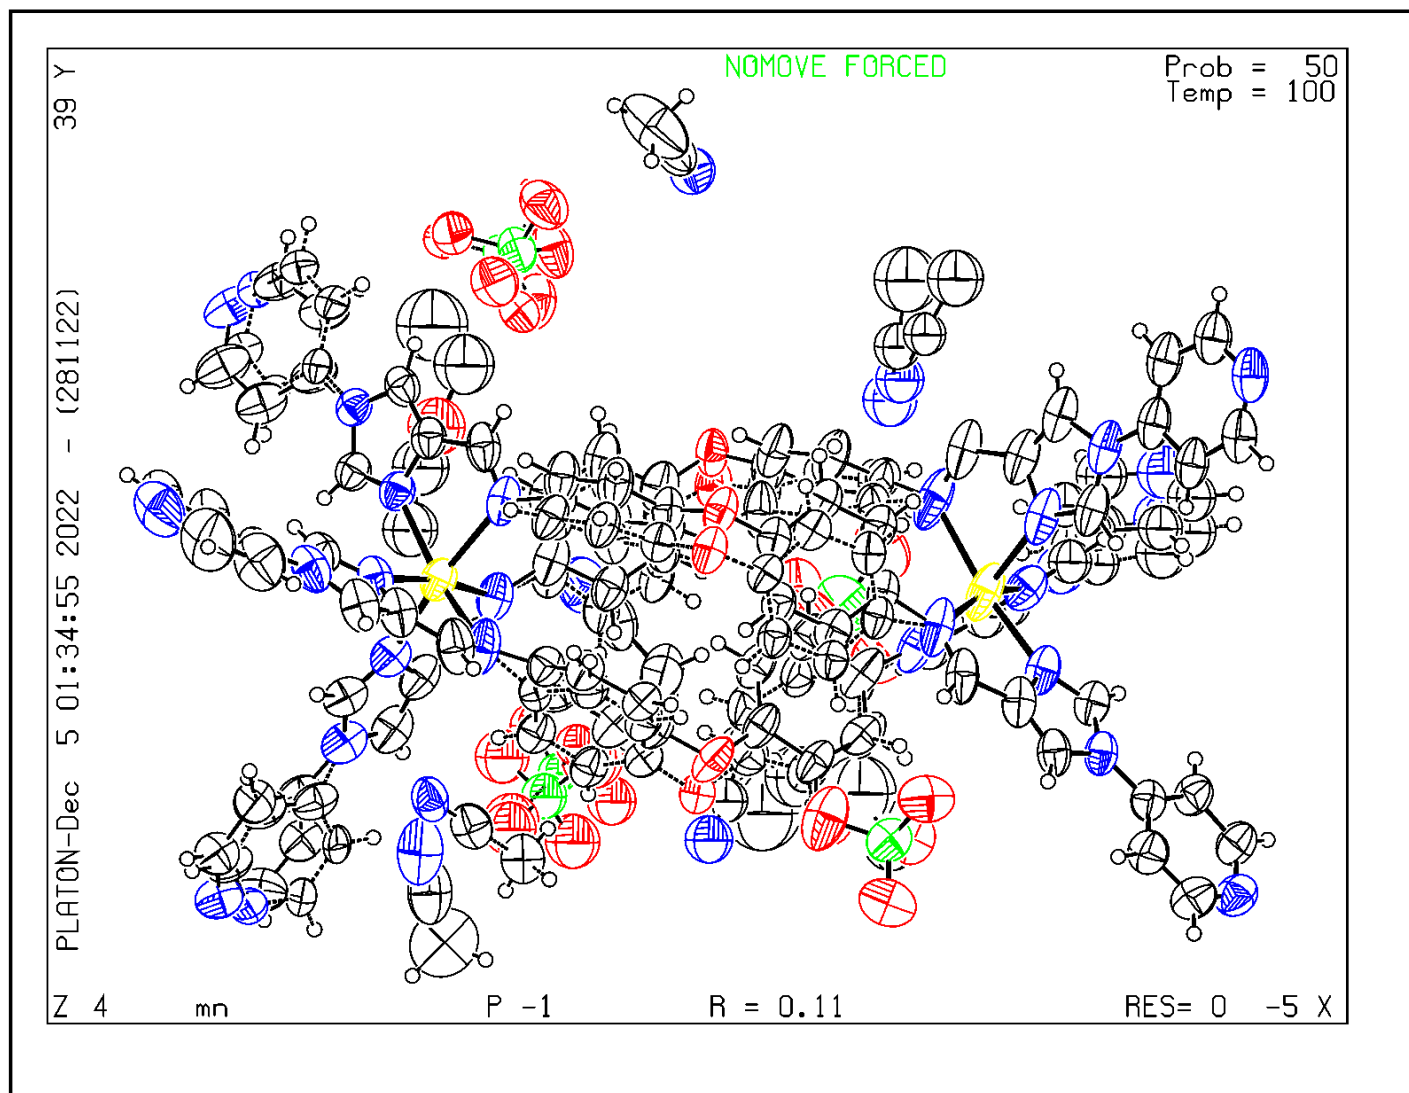

[Download CIF editor \(publCIF\) from the IUCr](#)  
[Download CIF editor \(enCIFer\) from the CCDC](#)  
[Test a new CIF entry](#)
