# Supplementary material for: Investigating the Conformations of a Family of [M2L3]4+ Helicates Using Single Crystal X-ray Diffraction
Source: MDPI journal article supplement (doi:10.3390/molecules28031404), 2023-02-01
Supplement: s1 [file s1]

No syntax errors found.  
Please wait while processing ....

[CIF dictionary](#)  
[Interpreting this report](#)

## Datablock: cut81\_a

|                    |                                                                 |                                                                 |
|--------------------|-----------------------------------------------------------------|-----------------------------------------------------------------|
| Bond precision:    | C-C = 0.0085 Å                                                  | Wavelength=0.71073                                              |
| Cell:              | a=16.230(3) b=17.690(4) c=20.430(4)                             |                                                                 |
|                    | alpha=80.45(3) beta=89.74(3) gamma=72.24(3)                     |                                                                 |
| Temperature:       | 100 K                                                           |                                                                 |
|                    | Calculated                                                      | Reported                                                        |
| Volume             | 5502(2)                                                         | 5502(2)                                                         |
| Space group        | P -1                                                            | P -1                                                            |
| Hall group         | -P 1                                                            | -P 1                                                            |
| Moiety formula     | 2(C90 H64 N24 Ni2 O3), 8(B F4), 2(C4 O), 3(C2 N), 4(C2 H3 N), 0 | C90 H64 N24 Ni2 O3, 4(B F4), 1.5(C2 N), 2(C2 H3 N), C4 O, 0.25( |
| Sum formula        | C202 H140 B8 F32 N55 Ni4 O8.50 [+ solvent]                      | C101 H70 B4 F16 N27.50 Ni2 O4.25                                |
| Mr                 | 4402.94                                                         | 2201.50                                                         |
| Dx, g cm-3         | 1.329                                                           | 1.329                                                           |
| Z                  | 1                                                               | 2                                                               |
| Mu (mm-1)          | 0.432                                                           | 0.432                                                           |
| F000               | 2245.0                                                          | 2245.0                                                          |
| F000'              | 2247.46                                                         |                                                                 |
| h,k,lmax           | 20,21,25                                                        | 20,21,25                                                        |
| Nref               | 21676                                                           | 20663                                                           |
| Tmin,Tmax          | 0.949,0.991                                                     |                                                                 |
| Tmin'              | 0.917                                                           |                                                                 |
| Correction method= | Not given                                                       |                                                                 |
| Data completeness= | 0.953                                                           | Theta(max)= 26.022                                              |
| R(reflections)=    | 0.1109( 16141)                                                  | wR2(reflections)= 0.3899( 20663)                                |
| S =                | 1.725                                                           | Npar= 1435                                                      |

The following ALERTS were generated. Each ALERT has the format

**test-name\_ALERT\_alert-type\_alert-level.**

Click on the hyperlinks for more details of the test.

### Alert level A

[PLAT201\\_ALERT\\_2\\_A](#) Isotropic non-H Atoms in Main Residue(s) ..... 19 Report  
O1A N1C C1C C2C C3C etc.

**Author Response:** Weak high-angle reflections result in high Rint. This affects refine parameters wR2, lowers bond precision and probably does not describe anisotropic displacements correctly. Orientational disorder in the helicate may give rise to some reflections which are not compatible with the assignment of Bravais lattice Orientational disorder in the linker segment of ligand A could not be satisfactorily modelled with anisotropic displacement parameters.

[PLAT934\\_ALERT\\_3\\_A](#) Number of (Iobs-Icalc)/Sigma(W) > 10 Outliers .. 16 Check

**Author Response:** Weak high-angle reflections result in high Rint. This affects refine parameters wR2, lowers bond precision and probably does not describe anisotropic displacements correctly. Orientational disorder in the helicate may give rise to some reflections which are not compatible with the assignment of Bravais lattice

### Alert level B

[PLAT084\\_ALERT\\_3\\_B](#) High wR2 Value (i.e. > 0.25) ..... 0.39 Report

**Author Response:** Weak high-angle reflections result in high Rint. This affects refine parameters wR2, lowers bond precision and probably does not describe anisotropic displacements correctly. Orientational disorder in the helicate may give rise to some reflections which are not compatible with the assignment of Bravais lattice

[PLAT315\\_ALERT\\_2\\_B](#) Singly Bonded Carbon Detected (H-atoms Missing). C1ET Check

**Author Response:** Orientational disorder in some solvent molecules prevented anisotropic modelling, and in some cases hydrogen atoms were not fixed to allow the shift to converge to

zero.

[PLAT315 ALERT 2 B](#) Singly Bonded Carbon Detected (H-atoms Missing). C4ET Check

### Alert level C

[PLAT029 ALERT 3 C](#) \_diffn\_measured\_fraction\_theta\_full value Low . 0.979 Why?  
[PLAT077 ALERT 4 C](#) Unitcell Contains Non-integer Number of Atoms .. Please Check  
[PLAT082 ALERT 2 C](#) High R1 Value ..... 0.11 Report  
[PLAT202 ALERT 3 C](#) Isotropic non-H Atoms in Anion/Solvent ..... 16 Check  
                   F1A      F2A      F3A      F4A      B1A      O1ET      etc.  
[PLAT220 ALERT 2 C](#) NonSolvent Resd 1 C Ueq(max)/Ueq(min) Range 3.2 Ratio  
[PLAT230 ALERT 2 C](#) Hirshfeld Test Diff for N4A --C9A . 6.2 s.u.  
[PLAT230 ALERT 2 C](#) Hirshfeld Test Diff for N8B --C30B . 5.3 s.u.  
[PLAT241 ALERT 2 C](#) High 'MainMol' Ueq as Compared to Neighbors of 01B Check  
**And 2 other PLAT241 Alerts**  
 More ...  
[PLAT242 ALERT 2 C](#) Low 'MainMol' Ueq as Compared to Neighbors of C16B Check  
[PLAT243 ALERT 4 C](#) High 'Solvent' Ueq as Compared to Neighbors of 01ET Check  
[PLAT244 ALERT 4 C](#) Low 'Solvent' Ueq as Compared to Neighbors of C2ET Check  
**And 2 other PLAT244 Alerts**  
 More ...  
[PLAT260 ALERT 2 C](#) Large Average Ueq of Residue Including F5 0.118 Check  
**And 4 other PLAT260 Alerts**  
 More ...  
[PLAT334 ALERT 2 C](#) Small <C-C> Benzene Dist. C16A -C21A . 1.37 Ang.  
[PLAT334 ALERT 2 C](#) Small <C-C> Benzene Dist. C10D -C15D . 1.35 Ang.  
[PLAT341 ALERT 3 C](#) Low Bond Precision on C-C Bonds ..... 0.00847 Ang.  
[PLAT767 ALERT 4 C](#) INS Embedded LIST 6 Instruction Should be LIST 4 Please Check  
[PLAT906 ALERT 3 C](#) Large K Value in the Analysis of Variance ..... 3.103 Check  
[PLAT911 ALERT 3 C](#) Missing FCF Refl Between Thmin & STh/L= 0.600 427 Report  
[PLAT918 ALERT 3 C](#) Reflection(s) with I(obs) much Smaller I(calc) . 16 Check  
[PLAT922 ALERT 1 C](#) wR2 in the CIF and FCF Differ by ..... -0.0011 Check  
[PLAT973 ALERT 2 C](#) Check Calcd Positive Resid. Density on Ni2 1.38 eA-3  
[PLAT973 ALERT 2 C](#) Check Calcd Positive Resid. Density on Ni1 1.32 eA-3  
[PLAT976 ALERT 2 C](#) Check Calcd Resid. Dens. 0.76Ang From N1C . -0.45 eA-3

### Alert level G

[PLAT002 ALERT 2 G](#) Number of Distance or Angle Restraints on AtSite 142 Note  
[PLAT003 ALERT 2 G](#) Number of Uiso or Uij Restrained non-H Atoms ... 3 Report  
[PLAT042 ALERT 1 G](#) Calc. and Reported MoietyFormula Strings Differ Please Check  
[PLAT045 ALERT 1 G](#) Calculated and Reported Z Differ by a Factor ... 0.500 Check  
[PLAT072 ALERT 2 G](#) SHELXL First Parameter in WGHT Unusually Large 0.20 Report  
[PLAT154 ALERT 1 G](#) The s.u.'s on the Cell Angles are Equal ..(Note) 0.03 Degree  
[PLAT172 ALERT 4 G](#) The CIF-Embedded .res File Contains DFIX Records 15 Report  
[PLAT173 ALERT 4 G](#) The CIF-Embedded .res File Contains DANG Records 6 Report  
[PLAT174 ALERT 4 G](#) The CIF-Embedded .res File Contains FLAT Records 13 Report  
[PLAT176 ALERT 4 G](#) The CIF-Embedded .res File Contains SADI Records 120 Report  
[PLAT180 ALERT 4 G](#) Check Cell Rounding: # of Values Ending with 0 = 3 Note  
[PLAT187 ALERT 4 G](#) The CIF-Embedded .res File Contains RIGU Records 23 Report  
[PLAT191 ALERT 3 G](#) A Non-default SADI Restraint Value has been used 0.0400 Report  
**And 57 other PLAT191 Alerts**  
 More ...  
[PLAT244 ALERT 4 G](#) Low 'Solvent' Ueq as Compared to Neighbors of B2 Check  
[PLAT244 ALERT 4 G](#) Low 'Solvent' Ueq as Compared to Neighbors of B4 Check  
[PLAT300 ALERT 4 G](#) Atom Site Occupancy of N1S3 Constrained at 0.5 Check  
**And 3 other PLAT300 Alerts**  
 More ...  
[PLAT301 ALERT 3 G](#) Main Residue Disorder .....(Resd 1 ) 22% Note  
[PLAT302 ALERT 4 G](#) Anion/Solvent/Minor-Residue Disorder (Resd 2 ) 100% Note  
**And 9 other PLAT302 Alerts**  
 More ...  
[PLAT304 ALERT 4 G](#) Non-Integer Number of Atoms in ..... (Resd 2 ) 2.54 Check  
**And 9 other PLAT304 Alerts**  
 More ...  
[PLAT311 ALERT 2 G](#) Isolated Disordered Oxygen Atom (No H's ?) ..... 01W Check  
[PLAT315 ALERT 2 G](#) Singly Bonded Carbon Detected (H-atoms Missing). C2S2 Check

**Author Response: Orientational disorder in some solvent molecules prevented anisotropic modelling, and in some cases hydrogen atoms were not fixed to allow the shift to converge to zero.**

### And 2 other PLAT315 Alerts

More ...  
[PLAT343 ALERT 2 G](#) Unusual sp? Angle Range in Main Residue for C9A Check  
[PLAT343 ALERT 2 G](#) Unusual sp? Angle Range in Main Residue for C12B Check  
[PLAT344 ALERT 2 G](#) Unusual sp? Angle Range in Solvent/Ion for C1ET Check

**And 3 other PLAT344 Alerts**

More ...

|                                   |                                                  |              |   |              |
|-----------------------------------|--------------------------------------------------|--------------|---|--------------|
| <a href="#">PLAT367 ALERT 2 G</a> | Long? C(sp?)-C(sp?) Bond                         | C3ET - C4ET  | . | 1.59 Ang.    |
| <a href="#">PLAT398 ALERT 2 G</a> | Deviating C-O-C Angle From 120 for O1ET          |              | . | 137.9 Degree |
| <a href="#">PLAT432 ALERT 2 G</a> | Short Inter X...Y Contact                        | F12B ..C4B   | . | 2.91 Ang.    |
|                                   |                                                  | -1+x,y,z =   |   | 1_455 Check  |
| <a href="#">PLAT432 ALERT 2 G</a> | Short Inter X...Y Contact                        | O1F ..C24C   | . | 3.01 Ang.    |
|                                   |                                                  | 1-x,-y,1-z = |   | 2_656 Check  |
| <a href="#">PLAT432 ALERT 2 G</a> | Short Inter X...Y Contact                        | C1C ..C21D   | . | 3.15 Ang.    |
|                                   |                                                  | 1-x,1-y,-z = |   | 2_665 Check  |
| <a href="#">PLAT432 ALERT 2 G</a> | Short Inter X...Y Contact                        | C3C ..C12D   | . | 3.14 Ang.    |
|                                   |                                                  | 1-x,1-y,-z = |   | 2_665 Check  |
| <a href="#">PLAT432 ALERT 2 G</a> | Short Inter X...Y Contact                        | C4C ..C12D   | . | 2.69 Ang.    |
|                                   |                                                  | 1-x,1-y,-z = |   | 2_665 Check  |
| <a href="#">PLAT432 ALERT 2 G</a> | Short Inter X...Y Contact                        | C4C ..C11D   | . | 2.92 Ang.    |
|                                   |                                                  | 1-x,1-y,-z = |   | 2_665 Check  |
| <a href="#">PLAT432 ALERT 2 G</a> | Short Inter X...Y Contact                        | C5C ..C12D   | . | 2.83 Ang.    |
|                                   |                                                  | 1-x,1-y,-z = |   | 2_665 Check  |
| <a href="#">PLAT432 ALERT 2 G</a> | Short Inter X...Y Contact                        | C5C ..C11D   | . | 3.19 Ang.    |
|                                   |                                                  | 1-x,1-y,-z = |   | 2_665 Check  |
| <a href="#">PLAT605 ALERT 4 G</a> | Largest Solvent Accessible VOID in the Structure |              |   | 459 A**3     |
| <a href="#">PLAT720 ALERT 4 G</a> | Number of Unusual/Non-Standard Labels .....      |              |   | 32 Note      |
| <a href="#">PLAT802 ALERT 4 G</a> | CIF Input Record(s) with more than 80 Characters |              |   | 7 Info       |
| <a href="#">PLAT811 ALERT 5 G</a> | No ADDSYM Analysis: Too Many Excluded Atoms .... |              |   | ! Info       |
| <a href="#">PLAT860 ALERT 3 G</a> | Number of Least-Squares Restraints .....         |              |   | 912 Note     |
| <a href="#">PLAT868 ALERT 4 G</a> | ALERTS Due to the Use of _smtbx_masks Suppressed |              |   | ! Info       |
| <a href="#">PLAT883 ALERT 1 G</a> | No Info/Value for _atom_sites_solution_primary . |              |   | Please Do !  |
| <a href="#">PLAT912 ALERT 4 G</a> | Missing # of FCF Reflections Above STh/L= 0.600  |              |   | 588 Note     |
| <a href="#">PLAT978 ALERT 2 G</a> | Number C-C Bonds with Positive Residual Density. |              |   | 0 Info       |
| <a href="#">PLAT992 ALERT 5 G</a> | Repd & Actual _reflns_number_gt Values Differ by |              |   | 4 Check      |

2 **ALERT level A** = Most likely a serious problem - resolve or explain  
 3 **ALERT level B** = A potentially serious problem, consider carefully  
 31 **ALERT level C** = Check. Ensure it is not caused by an omission or oversight  
 127 **ALERT level G** = General information/check it is not something unexpected

5 ALERT type 1 CIF construction/syntax error, inconsistent or missing data  
 45 ALERT type 2 Indicator that the structure model may be wrong or deficient  
 68 ALERT type 3 Indicator that the structure quality may be low  
 43 ALERT type 4 Improvement, methodology, query or suggestion  
 2 ALERT type 5 Informative message, check

It is advisable to attempt to resolve as many as possible of the alerts in all categories. Often the minor alerts point to easily fixed oversights, errors and omissions in your CIF or refinement strategy, so attention to these fine details can be worthwhile. In order to resolve some of the more serious problems it may be necessary to carry out additional measurements or structure refinements. However, the purpose of your study may justify the reported deviations and the more serious of these should normally be commented upon in the discussion or experimental section of a paper or in the "special\_details" fields of the CIF. checkCIF was carefully designed to identify outliers and unusual parameters, but every test has its limitations and alerts that are not important in a particular case may appear. Conversely, the absence of alerts does not guarantee there are no aspects of the results needing attention. It is up to the individual to critically assess their own results and, if necessary, seek expert advice.

**Publication of your CIF in IUCr journals**

A basic structural check has been run on your CIF. These basic checks will be run on all CIFs submitted for publication in IUCr journals (*Acta Crystallographica*, *Journal of Applied Crystallography*, *Journal of Synchrotron Radiation*); however, if you intend to submit to *Acta Crystallographica Section C* or *E* or *IUCrData*, you should make sure that [full publication checks](#) are run on the final version of your CIF prior to submission.

**Publication of your CIF in other journals**

Please refer to the *Notes for Authors* of the relevant journal for any special instructions relating to CIF submission.

PLATON version of 28/11/2022; check.def file version of 28/11/2022

**Datablock cut81\_a - ellipsoid plot**

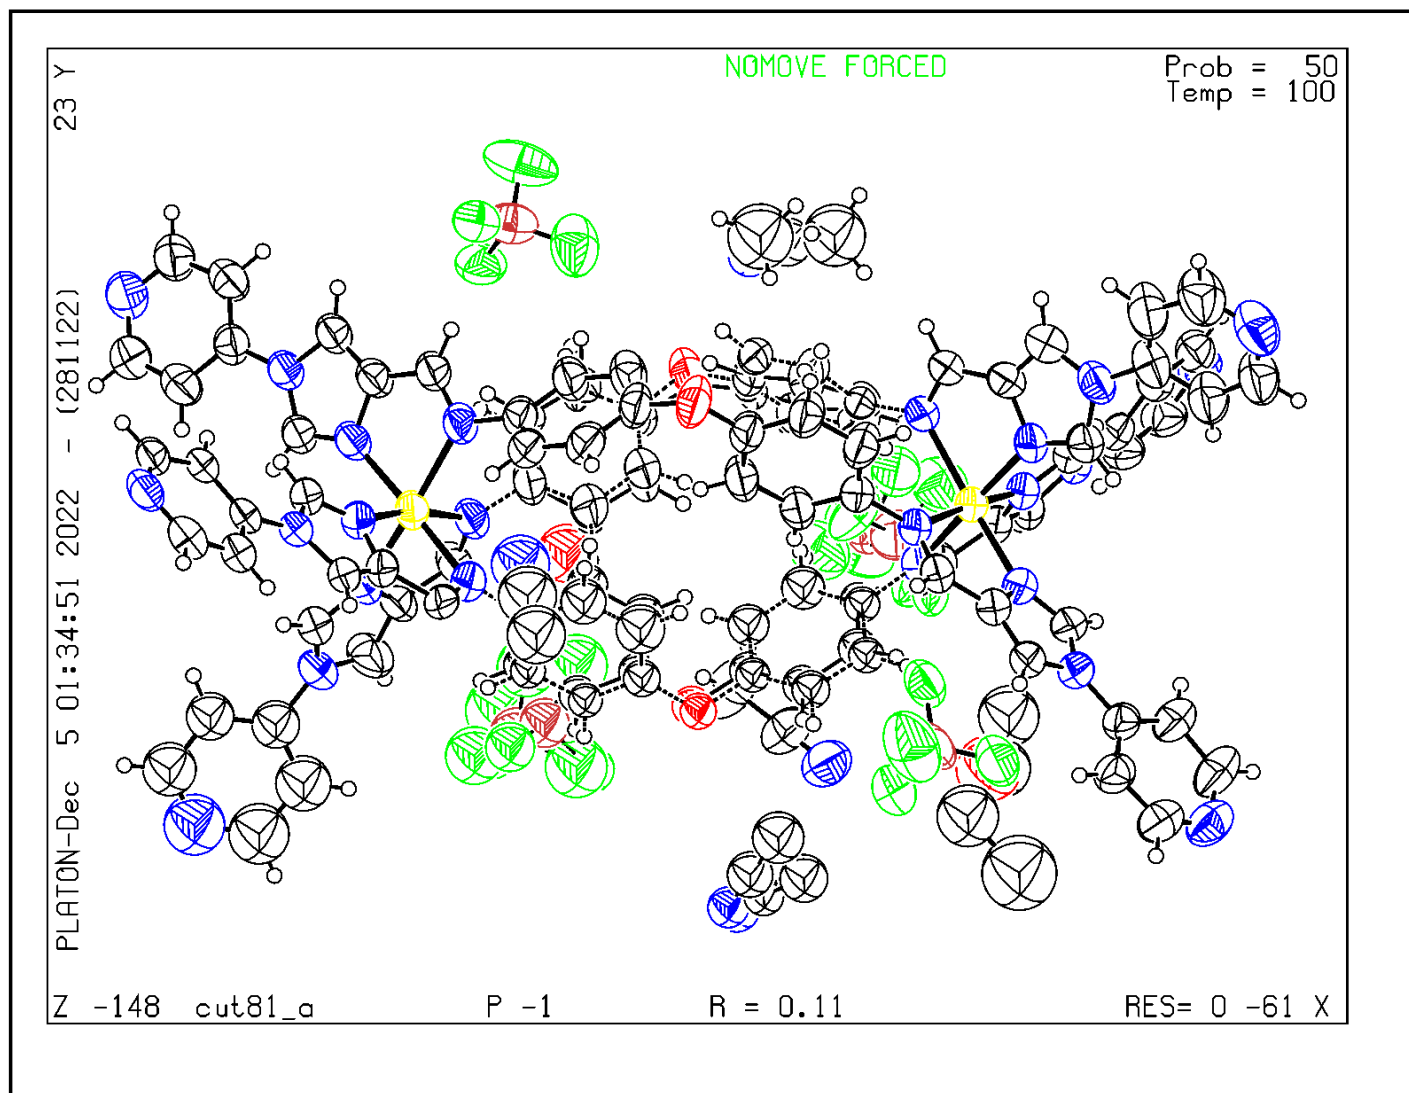

[Download CIF editor \(publCIF\) from the IUCr](#)  
[Download CIF editor \(enCIFer\) from the CCDC](#)  
[Test a new CIF entry](#)
