# Supplementary material for: Investigating the Conformations of a Family of [M2L3]4+ Helicates Using Single Crystal X-ray Diffraction
Source: Molecules. 2023 Feb 1;28(3):1404. doi: 10.3390/molecules28031404 (PMC9921459; doi:10.3390/molecules28031404)
Supplement: Supplementary file 1 [file molecules-28-01404-s001.zip]

Archive with 11 entries (11 files):
- Final cifs/2224285.cif
- Final cifs/2224285.pdf
- Final cifs/2224286.cif
- Final cifs/2224286.pdf
- Final cifs/2224287.cif
- Final cifs/2224287.pdf
- Final cifs/2224288.cif
- Final cifs/2224288.pdf
- Final cifs/2224289.cif
- Final cifs/2224289.pdf
- molecules-2189619-supplementary.pdf
