# Supplementary material for: Investigating the Conformations of a Family of [M2L3]4+ Helicates Using Single Crystal X-ray Diffraction
Source: Molecules. 2023 Feb 1;28(3):1404. doi: 10.3390/molecules28031404 (PMC9921459; doi:10.3390/molecules28031404)
Supplement: Supplementary file 1 [file molecules-28-01404-s001.zip › Final cifs/2224285.cif]

####################################################################### 
# 
# This file contains crystal structure data downloaded from the 
# Cambridge Structural Database (CSD) hosted by the Cambridge 
# Crystallographic Data Centre (CCDC).
# 
# Full information about CCDC data access policies and citation 
# guidelines are available at http://www.ccdc.cam.ac.uk/access/V1 
# 
# Audit and citation data items may have been added by the CCDC. 
# Please retain this information to preserve the provenance of 
# this file and to allow appropriate attribution of the data. 
# 
#######################################################################
data_mn
_audit_creation_date               2022-12-05
_audit_creation_method
;
Olex2 1.5
(compiled 2022.04.07 svn.rca3783a0 for OlexSys, GUI svn.r6498)
;
_shelx_SHELXL_version_number       2018/3
loop_
  _audit_author_name
  _audit_author_address
 'Matthew Wallis'
;
Western Sydney University
Australia
;

_audit_contact_author_address      ?
_audit_contact_author_email        ?
_audit_contact_author_name         ''
_audit_contact_author_phone        ?
_audit_update_record
;
2022-12-05 deposited with the CCDC.	2022-12-05 downloaded from the CCDC.
;
_publ_contact_author_id_orcid      ?
_publ_section_references
;
Dolomanov, O.V., Bourhis, L.J., Gildea, R.J, Howard, J.A.K. & Puschmann, H.
 (2009), J. Appl. Cryst. 42, 339-341.

Sheldrick, G.M. (2015). Acta Cryst. A71, 3-8.

Sheldrick, G.M. (2015). Acta Cryst. C71, 3-8.
;
_chemical_name_common              ?
_chemical_name_systematic          ?
_chemical_formula_moiety          
 'C90 H66 Mn2 N24 O3, 4(Cl O4), C4 H10 O, 4.5(C2 H3 N), 0.5(C4 O), [+ solvents]'
_chemical_formula_sum              'C105 H75.50 Cl4 Mn2 N28.50 O20.50'
_chemical_formula_weight           2316.11
_chemical_melting_point            ?
# end Validation Reply Form
_chemical_properties_physical      Efflorescent
loop_
  _atom_type_symbol
  _atom_type_description
  _atom_type_scat_dispersion_real
  _atom_type_scat_dispersion_imag
  _atom_type_scat_source
 C C 0.0033 0.0016 'International Tables Vol C Tables 4.2.6.8 and 6.1.1.4'
 H H 0.0000 0.0000 'International Tables Vol C Tables 4.2.6.8 and 6.1.1.4'
 Cl Cl 0.1484 0.1585 'International Tables Vol C Tables 4.2.6.8 and 6.1.1.4'
 Mn Mn 0.3368 0.7283 'International Tables Vol C Tables 4.2.6.8 and 6.1.1.4'
 N N 0.0061 0.0033 'International Tables Vol C Tables 4.2.6.8 and 6.1.1.4'
 O O 0.0106 0.0060 'International Tables Vol C Tables 4.2.6.8 and 6.1.1.4'

_shelx_space_group_comment
;
The symmetry employed for this shelxl refinement is uniquely defined
by the following loop, which should always be used as a source of
symmetry information in preference to the above space-group names.
They are only intended as comments.
;
_space_group_crystal_system        'triclinic'
_space_group_IT_number             2
_space_group_name_H-M_alt          'P -1'
_space_group_name_Hall             '-P 1'
loop_
  _space_group_symop_operation_xyz
 'x, y, z'
 '-x, -y, -z'

_cell_length_a                     16.060(3)
_cell_length_b                     18.190(4)
_cell_length_c                     20.480(4)
_cell_angle_alpha                  79.38(3)
_cell_angle_beta                   88.85(3)
_cell_angle_gamma                  73.39(3)
_cell_volume                       5632(2)
_cell_formula_units_Z              2
_cell_measurement_reflns_used      3419
_cell_measurement_temperature      100
_cell_measurement_theta_max        20.00
_cell_measurement_theta_min        2.40
_shelx_estimated_absorpt_T_max     0.992
_shelx_estimated_absorpt_T_min     0.924
_exptl_absorpt_coefficient_mu      0.399
_exptl_absorpt_correction_T_max    ?
_exptl_absorpt_correction_T_min    ?
_exptl_absorpt_correction_type     none
_exptl_absorpt_process_details     ?
_exptl_absorpt_special_details     ?
_exptl_crystal_colour              'clear light yellow'
_exptl_crystal_colour_lustre       clear
_exptl_crystal_colour_modifier     light
_exptl_crystal_colour_primary      yellow
_exptl_crystal_density_diffrn      1.366
_exptl_crystal_density_meas        ?
_exptl_crystal_density_method      ?
_exptl_crystal_description         plate
_exptl_crystal_F_000               2374
_exptl_crystal_preparation         ?
_exptl_crystal_recrystallization_method 
 'Vapour diffusion of diethyl ether into acetonitrile'
_exptl_crystal_size_max            0.2
_exptl_crystal_size_mid            0.2
_exptl_crystal_size_min            0.02
_exptl_transmission_factor_max     ?
_exptl_transmission_factor_min     ?
_diffrn_reflns_av_R_equivalents    0.0277
_diffrn_reflns_av_unetI/netI       0.0169
_diffrn_reflns_Laue_measured_fraction_full  0.988
_diffrn_reflns_Laue_measured_fraction_max  0.988
_diffrn_reflns_limit_h_max         18
_diffrn_reflns_limit_h_min         -18
_diffrn_reflns_limit_k_max         21
_diffrn_reflns_limit_k_min         -21
_diffrn_reflns_limit_l_max         24
_diffrn_reflns_limit_l_min         -24
_diffrn_reflns_number              121904
_diffrn_reflns_point_group_measured_fraction_full  0.988
_diffrn_reflns_point_group_measured_fraction_max  0.988
_diffrn_reflns_theta_full          24.712
_diffrn_reflns_theta_max           24.712
_diffrn_reflns_theta_min           1.012
_diffrn_ambient_temperature        100
_diffrn_detector_area_resol_mean   ?
_diffrn_measured_fraction_theta_full  0.988
_diffrn_measured_fraction_theta_max  0.988
_diffrn_measurement_device_type    'Australian Synchrotron MX1'
_diffrn_measurement_method         '\w scans'
_diffrn_radiation_monochromator    graphite
_diffrn_radiation_type             MoK\a
_diffrn_radiation_wavelength       0.71073
_diffrn_source                     ?
_diffrn_standards_number           0
_reflns_Friedel_coverage           0.000
_reflns_Friedel_fraction_full      .
_reflns_Friedel_fraction_max       .
_reflns_number_gt                  14564
_reflns_number_total               18961
_reflns_special_details
;
 Reflections were merged by SHELXL according to the crystal
 class for the calculation of statistics and refinement.
 
 Structure factors included contributions from the .fab file.
 
 _reflns_Friedel_fraction is defined as the number of unique
 Friedel pairs measured divided by the number that would be
 possible theoretically, ignoring centric projections and
 systematic absences.
;
_reflns_threshold_expression       'I > 2\s(I)'
_computing_cell_refinement         ?
_computing_data_collection         ?
_computing_data_reduction          ?
_computing_molecular_graphics      'Olex2 1.5 (Dolomanov et al., 2009)'
_computing_publication_material    'Olex2 1.5 (Dolomanov et al., 2009)'
_computing_structure_refinement    'SHELXL 2018/3 (Sheldrick, 2015)'
_computing_structure_solution      'SHELXT 2018/2 (Sheldrick, 2018)'
_refine_diff_density_max           1.318
_refine_diff_density_min           -0.963
_refine_diff_density_rms           0.097
_refine_ls_extinction_coef         .
_refine_ls_extinction_method       none
_refine_ls_goodness_of_fit_ref     1.671
_refine_ls_hydrogen_treatment      constr
_refine_ls_matrix_type             full
_refine_ls_number_parameters       1862
_refine_ls_number_reflns           18961
_refine_ls_number_restraints       1480
_refine_ls_R_factor_all            0.1257
_refine_ls_R_factor_gt             0.1100
_refine_ls_restrained_S_all        1.654
_refine_ls_shift/su_max            0.003
_refine_ls_shift/su_mean           0.000
_refine_ls_structure_factor_coef   Fsqd
_refine_ls_weighting_details      
 'w=1/[\s^2^(Fo^2^)+(0.2000P)^2^] where P=(Fo^2^+2Fc^2^)/3'
_refine_ls_weighting_scheme        calc
_refine_ls_wR_factor_gt            0.3512
_refine_ls_wR_factor_ref           0.3776
_refine_special_details            SQUEEZE
_olex2_refinement_description
;
1. Shared sites
{H29D, H29A}
2. Others
 Fixed Sof: C1EV(0.5) C2EV(0.5) O1EV(0.5) C3EV(0.5) C4EV(0.5) C1S5(0.5)
 N1S5(0.5) C2S5(0.5) H2SJ(0.5) H2SK(0.5) H2SL(0.5)
 Fixed Uiso: H25B(0.076) H6B(0.082) H24B(0.079) H7A(0.103) H2B(0.089)
 H22B(0.092) H7B(0.086) H15C(0.103) H25A(0.088) H14A(0.076) H2A(0.092)
 H14C(0.087) H1A(0.097) H22A(0.102) H25C(0.086) H15A(0.078) H6A(0.093)
 H4B(0.098) H24A(0.1) H9B(0.103) H20A(0.09) H24C(0.109) H27B(0.058) H5A(0.103)
 H4A(0.102) H6C(0.105) H18B(0.089) H29B(0.065) H1B(0.1) H21A(0.087) H29A(0.099)
 H22C(0.113) H9C(0.109) H5B(0.11) H30A(0.097) H18A(0.087) H11B(0.072)
 H15B(0.079) H14B(0.072) H29C(0.132) H17B(0.084) H17A(0.092) H12B(0.075)
 H30B(0.069) H18C(0.077) H26B(0.068) H30C(0.14) H27A(0.095) H26A(0.115)
 H7C(0.144) H27C(0.151) H20B(0.086) H17C(0.077) H21B(0.085) H20C(0.089)
 H11C(0.096) H21C(0.099) H12C(0.096) H11A(0.094) H12A(0.108) H26C(0.18)
 H11F(0.105) H15F(0.08) H12F(0.117) H14F(0.087) H21F(0.083) H20F(0.08)
 H18F(0.092) H17F(0.102) H14E(0.086) H15E(0.089) H11E(0.082) H12E(0.085)
 H17E(0.078) H18E(0.089) H20E(0.1) H21E(0.103) H21D(0.097) H20D(0.092)
 H18D(0.09) H17D(0.096) H12D(0.113) H11D(0.11) H15D(0.078) H14D(0.088)
 H4C(0.112) H2C(0.112) H1C(0.133) H5C(0.145) H4F(0.132) H2F(0.153) H1F(0.157)
 H5F(0.143) H27E(0.099) H29E(0.108) H30E(0.124) H26E(0.119) H29D(0.11)
 H30D(0.094) H27D(0.071) H26D(0.084) H2SA(0.266) H2SB(0.266) H2SC(0.266)
 H2SD(0.201) H2SE(0.201) H2SF(0.201) H2SG(0.29) H2SH(0.29) H2SI(0.29)
 H2SJ(0.15) H2SK(0.15) H2SL(0.15) H2TA(0.132) H2TB(0.132) H2TC(0.132)
 Fixed X: H25B(-0.022298) H6B(0.92445) H24B(0.045989) H7A(0.774471)
 H2B(1.026063) H22B(0.231318) H7B(1.022122) H15C(0.744377) H25A(0.137984)
 H14A(0.3794) H2A(1.057397) H14C(0.720071) H1A(1.166775) H22A(0.164898)
 H25C(0.106363) H15A(0.523408) H6A(0.950341) H4B(1.115366) H24A(0.118924)
 H9B(0.892831) H20A(0.145571) H24C(0.344789) H27B(-0.079335) H5A(0.999935)
 H4A(0.883825) H6C(0.76236) H18B(0.375218) H29B(-0.163595) H1B(1.126516)
 H21A(0.196139) H29A(0.104405) H22C(0.418695) H9C(0.590973) H5B(1.213428)
 H30A(0.082616) H18A(0.297721) H11B(0.779092) H15B(0.744086) H14B(0.662972)
 H29C(0.055859) H17B(0.522696) H17A(0.343179) H12B(0.701279) H30B(-0.305274)
 H18C(0.512764) H26B(-0.223372) H30C(0.014306) H27A(0.084357) H26A(0.058159)
 H7C(0.574452) H27C(0.306105) H20B(0.384184) H17C(0.622419) H21B(0.529437)
 H20C(0.333559) H11C(0.548057) H21C(0.44397) H12C(0.516813) H11A(0.57465)
 H12A(0.428274) H26C(0.252915) H11F(0.508745) H15F(0.758142) H12F(0.468505)
 H14F(0.719195) H21F(0.41698) H20F(0.326493) H18F(0.504109) H17F(0.597993)
 H14E(0.651019) H15E(0.734329) H11E(0.760333) H12E(0.68443) H17E(0.511577)
 H18E(0.368646) H20E(0.366683) H21E(0.51135) H21D(0.183605) H20D(0.144931)
 H18D(0.313738) H17D(0.354011) H12D(0.411678) H11D(0.555149) H15D(0.529036)
 H14D(0.384937) H4C(0.514195) H2C(0.774717) H1C(0.737273) H5C(0.488978)
 H4F(0.520807) H2F(0.767364) H1F(0.722995) H5F(0.489506) H27E(-0.104178) H29E(-
 0.156518) H30E(-0.303471) H26E(-0.254099) H29D(0.095251) H30D(0.071305)
 H27D(0.137185) H26D(0.117125) H2SA(0.186339) H2SB(0.194939) H2SC(0.102671)
 H2SD(0.204775) H2SE(0.242041) H2SF(0.263689) H2SG(0.300165) H2SH(0.369779)
 H2SI(0.268017) H2SJ(0.473973) H2SK(0.485225) H2SL(0.399025) H2TA(0.457859)
 H2TB(0.386055) H2TC(0.369209)
 Fixed Y: H25B(0.307254) H6B(0.191672) H24B(0.505622) H7A(0.571289)
 H2B(0.124361) H22B(0.429608) H7B(0.056856) H15C(0.07632) H25A(0.055505)
 H14A(0.445833) H2A(0.413725) H14C(0.001071) H1A(0.475234) H22A(0.150763)
 H25C(0.249677) H15A(0.443218) H6A(0.364087) H4B(-0.022663) H24A(0.014142)
 H9B(0.142293) H20A(0.358708) H24C(0.128648) H27B(0.575506) H5A(0.68053)
 H4A(0.628514) H6C(0.387795) H18B(0.285782) H29B(0.38112) H1B(0.038312)
 H21A(0.441158) H29A(-0.049409) H22C(0.097306) H9C(0.198855) H5B(-0.103023)
 H30A(-0.16768) H18A(0.164366) H11B(0.116591) H15B(0.349171) H14B(0.376948)
 H29C(0.251532) H17B(0.274713) H17A(0.24756) H12B(0.142983) H30B(0.463218)
 H18C(0.133622) H26B(0.648331) H30C(0.274235) H27A(-0.101564) H26A(-0.214807)
 H7C(0.288647) H27C(0.159044) H20B(0.298401) H17C(0.086938) H21B(0.296396)
 H20C(0.097658) H11C(0.263102) H21C(0.049894) H12C(0.18517) H11A(0.337743)
 H12A(0.341061) H26C(0.184664) H11F(0.211016) H15F(0.087728) H12F(0.124813)
 H14F(-0.002529) H21F(-0.017302) H20F(0.034308) H18F(0.128496) H17F(0.077826)
 H14E(0.418239) H15E(0.381074) H11E(0.153454) H12E(0.188868) H17E(0.304005)
 H18E(0.300994) H20E(0.362685) H21E(0.360311) H21D(0.45969) H20D(0.367436)
 H18D(0.19189) H17D(0.283591) H12D(0.447865) H11D(0.444775) H15D(0.394511)
 H14D(0.397162) H4C(0.430935) H2C(0.400801) H1C(0.48122) H5C(0.50986)
 H4F(0.376263) H2F(0.386993) H1F(0.446357) H5F(0.435004) H27E(0.572241)
 H29E(0.36302) H30E(0.432739) H26E(0.630417) H29D(-0.05663) H30D(-0.17926)
 H27D(-0.096408) H26D(-0.218556) H2SA(0.857245) H2SB(0.770482) H2SC(0.835561)
 H2SD(0.147459) H2SE(0.127284) H2SF(0.196178) H2SG(-0.266712) H2SH(-0.235329)
 H2SI(-0.196304) H2SJ(0.068858) H2SK(0.1169) H2SL(0.090196) H2TA(-0.133165)
 H2TB(-0.065696) H2TC(-0.148383)
 Fixed Z: H25B(0.948495) H6B(0.492172) H24B(0.931648) H7A(0.581418)
 H2B(0.438269) H22B(0.939077) H7B(0.667005) H15C(0.639024) H25A(1.035972)
 H14A(0.536988) H2A(0.589375) H14C(0.741442) H1A(0.583027) H22A(0.786015)
 H25C(1.112186) H15A(0.526405) H6A(0.584791) H4B(0.611547) H24A(0.852082)
 H9B(0.746107) H20A(0.807726) H24C(1.189157) H27B(0.919867) H5A(0.567122)
 H4A(0.568449) H6C(0.420489) H18B(0.844432) H29B(0.935577) H1B(0.383841)
 H21A(0.72254) H29A(1.082052) H22C(1.065978) H9C(0.529471) H5B(0.551315)
 H30A(1.126637) H18A(0.745909) H11B(0.805727) H15B(0.741964) H14B(0.835786)
 H29C(1.213005) H17B(0.838264) H17A(0.658212) H12B(0.90205) H30B(0.91021)
 H18C(0.999914) H26B(0.891405) H30C(1.318779) H27A(0.900458) H26A(0.950404)
 H7C(0.398321) H27C(1.286699) H20B(1.036925) H17C(0.926463) H21B(1.029506)
 H20C(0.880497) H11C(0.673047) H21C(0.807808) H12C(0.770448) H11A(0.71824)
 H12A(0.7305) H26C(1.390179) H11F(0.638202) H15F(0.666522) H12F(0.718997)
 H14F(0.746861) H21F(0.822812) H20F(0.904559) H18F(0.961122) H17F(0.881573)
 H14E(0.814448) H15E(0.723234) H11E(0.801845) H12E(0.895694) H17E(0.827013)
 H18E(0.838306) H20E(1.016623) H21E(1.006343) H21D(0.736179) H20D(0.818067)
 H18D(0.746362) H17D(0.666186) H12D(0.719029) H11D(0.699059) H15D(0.518632)
 H14D(0.538152) H4C(0.327465) H2C(0.302402) H1C(0.197903) H5C(0.222302)
 H4F(0.312175) H2F(0.283149) H1F(0.174472) H5F(0.201403) H27E(0.897566)
 H29E(0.956824) H30E(0.943807) H26E(0.889548) H29D(1.073238) H30D(1.101996)
 H27D(0.882876) H26D(0.921242) H2SA(0.726597) H2SB(0.765503) H2SC(0.758512)
 H2SD(0.520613) H2SE(0.595702) H2SF(0.5439) H2SG(0.92096) H2SH(0.875769)
 H2SI(0.859124) H2SJ(0.587379) H2SK(0.643034) H2SL(0.639235) H2TA(0.891118)
 H2TB(0.844169) H2TC(0.871152)
;
_atom_sites_solution_hydrogens     geom
_atom_sites_solution_primary       dual
_atom_sites_solution_secondary     ?
loop_
  _atom_site_label
  _atom_site_type_symbol
  _atom_site_fract_x
  _atom_site_fract_y
  _atom_site_fract_z
  _atom_site_U_iso_or_equiv
  _atom_site_adp_type
  _atom_site_occupancy
  _atom_site_site_symmetry_order
  _atom_site_calc_flag
  _atom_site_refinement_flags_posn
  _atom_site_refinement_flags_adp
  _atom_site_refinement_flags_occupancy
  _atom_site_disorder_assembly
  _atom_site_disorder_group
 Mn2 Mn 0.20882(4) 0.21678(4) 0.95380(3) 0.0681(3) Uani 1 1 d . . . . .
 Mn1 Mn 0.76066(5) 0.29230(7) 0.59298(4) 0.0952(4) Uani 1 1 d . . . . .
 N7B N -0.0218(2) 0.4221(2) 0.93836(17) 0.0613(8) Uani 1 1 d D . . . .
 N2B N 0.9970(2) 0.1077(2) 0.56648(17) 0.0659(9) Uani 1 1 d . . . . .
 N2A N 0.8883(2) 0.4813(3) 0.58122(17) 0.0774(11) Uani 1 1 d D . . . .
 N6B N 0.0961(2) 0.3220(2) 0.94815(19) 0.0645(9) Uani 1 1 d . . . . .
 N6A N 0.1559(2) 0.1194(2) 0.9485(2) 0.0710(10) Uani 1 1 d . . . . .
 N3B N 0.8812(2) 0.2026(3) 0.58334(18) 0.0742(11) Uani 1 1 d . . . . .
 N6C N 0.2141(3) 0.1994(3) 1.0648(2) 0.0737(10) Uani 1 1 d . . . . .
 N7A N 0.1212(3) 0.0089(3) 0.9545(2) 0.0786(11) Uani 1 1 d D . . . .
 N5A N 0.1967(2) 0.2137(3) 0.8421(2) 0.0754(11) Uani 1 1 d D . . . .
 N3A N 0.8207(2) 0.3900(3) 0.5887(2) 0.0873(13) Uani 1 1 d D . . . .
 N3C N 0.7184(2) 0.3134(3) 0.4855(2) 0.0797(11) Uani 1 1 d . . . . .
 N5B N 0.2676(3) 0.3204(3) 0.9376(2) 0.0765(11) Uani 1 1 d D . . . .
 N1A N 1.0946(3) 0.5829(3) 0.57557(19) 0.0866(12) Uani 1 1 d D . . . .
 O1A O 0.3028(7) 0.3962(8) 0.6347(6) 0.080(3) Uani 0.488(12) 1 d D . P A 1
 N7C N 0.2143(3) 0.1925(3) 1.1739(2) 0.0830(12) Uani 1 1 d . . . . .
 N4B N 0.8057(3) 0.2320(4) 0.7002(2) 0.0897(15) Uani 1 1 d D . . . .
 N4C N 0.6672(3) 0.2192(3) 0.5914(2) 0.0834(13) Uani 1 1 d D . . . .
 N1B N 1.1772(3) -0.0417(3) 0.4624(2) 0.0855(12) Uani 1 1 d . . . . .
 C25B C 0.0118(3) 0.3426(3) 0.9456(2) 0.0637(10) Uani 1 1 d . . . . .
 H25B H -0.022298 0.307254 0.948495 0.076 Uiso 1 1 calc R U . . .
 C23B C 0.1199(3) 0.3903(3) 0.9418(2) 0.0662(11) Uani 1 1 d . . . . .
 N5C N 0.3440(3) 0.1344(3) 0.9866(2) 0.0920(15) Uani 1 1 d D . . . .
 C3B C 1.0603(3) 0.0583(3) 0.5313(2) 0.0663(11) Uani 1 1 d . . . . .
 C6B C 0.9320(3) 0.1717(3) 0.5386(2) 0.0681(11) Uani 1 1 d . . . . .
 H6B H 0.924450 0.191672 0.492172 0.082 Uiso 1 1 calc R U . . .
 C24B C 0.0480(3) 0.4522(3) 0.9362(2) 0.0661(11) Uani 1 1 d . . . . .
 H24B H 0.045989 0.505622 0.931648 0.079 Uiso 1 1 calc R U . . .
 C28B C -0.1080(8) 0.4701(10) 0.9310(10) 0.046(4) Uani 0.38(4) 1 d D . P B 1
 N8B N -0.2756(10) 0.5627(10) 0.8985(10) 0.062(4) Uani 0.38(4) 1 d D . P B 1
 N4A N 0.6486(3) 0.3999(4) 0.6049(3) 0.110(2) Uani 1 1 d D . . . .
 N2C N 0.6653(4) 0.3507(3) 0.3838(3) 0.1076(16) Uiso 1 1 d D . . . .
 C7A C 0.8011(3) 0.5171(4) 0.5831(2) 0.0858(14) Uani 1 1 d D . . . .
 H7A H 0.774471 0.571289 0.581418 0.103 Uiso 1 1 calc R U . . .
 C2B C 1.0636(4) 0.0774(3) 0.4626(2) 0.0741(12) Uani 1 1 d . . . . .
 H2B H 1.026063 0.124361 0.438269 0.089 Uiso 1 1 calc R U . . .
 O1B O 0.6285(5) 0.2789(10) 0.9330(4) 0.068(3) Uani 0.457(19) 1 d D . P C 1
 C23A C 0.1495(3) 0.1038(3) 0.8853(3) 0.0768(13) Uani 1 1 d . . . . .
 C22B C 0.2127(4) 0.3845(4) 0.9393(2) 0.0770(14) Uani 1 1 d . . . . .
 H22B H 0.231318 0.429608 0.939077 0.092 Uiso 1 1 calc R U . . .
 C8A C 0.7599(3) 0.4612(4) 0.5876(2) 0.0854(15) Uani 1 1 d D . . . .
 C7B C 0.9868(3) 0.0966(3) 0.6340(2) 0.0720(12) Uani 1 1 d . . . . .
 H7B H 1.022122 0.056856 0.667005 0.086 Uiso 1 1 calc R U . . .
 C15C C 0.7005(12) 0.0977(9) 0.6676(10) 0.086(6) Uani 0.524(7) 1 d D . P D 1
 H15C H 0.744377 0.076320 0.639024 0.103 Uiso 0.524(7) 1 calc R U P D 1
 C23C C 0.2961(3) 0.1565(4) 1.0921(2) 0.0786(13) Uani 1 1 d . . . . .
 C25A C 0.1385(3) 0.0609(3) 0.9889(3) 0.0736(12) Uani 1 1 d . . . . .
 H25A H 0.137984 0.055505 1.035972 0.088 Uiso 1 1 calc R U . . .
 C14A C 0.4191(10) 0.4239(15) 0.5740(7) 0.063(5) Uani 0.488(12) 1 d D . P A 1
 H14A H 0.379400 0.445833 0.536988 0.076 Uiso 0.488(12) 1 calc R U P A 1
 C8B C 0.9158(3) 0.1544(4) 0.6433(2) 0.0760(13) Uani 1 1 d . . . . .
 C2A C 1.0434(3) 0.4689(4) 0.5842(2) 0.0769(13) Uani 1 1 d D . . . .
 H2A H 1.057397 0.413725 0.589375 0.092 Uiso 1 1 calc R U . . .
 C14C C 0.6850(8) 0.0531(10) 0.7263(9) 0.072(5) Uani 0.524(7) 1 d D . P D 1
 H14C H 0.720071 0.001071 0.741442 0.087 Uiso 0.524(7) 1 calc R U P D 1
 C3A C 0.9579(3) 0.5151(4) 0.5794(2) 0.0760(13) Uani 1 1 d D . . . .
 C1A C 1.1081(3) 0.5068(4) 0.5811(2) 0.0812(14) Uani 1 1 d D . . . .
 H1A H 1.166775 0.475234 0.583027 0.097 Uiso 1 1 calc R U . . .
 N8A N 0.0682(7) -0.2032(4) 1.0433(6) 0.082(3) Uani 0.74(3) 1 d D . P E 1
 C22A C 0.1706(3) 0.1575(4) 0.8305(3) 0.0848(15) Uani 1 1 d . . . . .
 H22A H 0.164898 0.150763 0.786015 0.102 Uiso 1 1 calc R U . . .
 C25C C 0.1659(4) 0.2201(3) 1.1157(2) 0.0719(12) Uani 1 1 d . . . . .
 H25C H 0.106363 0.249677 1.112186 0.086 Uiso 1 1 calc R U . . .
 C19A C 0.2169(14) 0.2569(10) 0.7824(8) 0.079(6) Uani 0.488(12) 1 d D . P A 1
 C15A C 0.5043(9) 0.4218(13) 0.5678(8) 0.065(5) Uani 0.488(12) 1 d D . P A 1
 H15A H 0.523408 0.443218 0.526405 0.078 Uiso 0.488(12) 1 calc R U P A 1
 C9A C 0.6684(3) 0.4646(5) 0.5961(3) 0.0932(19) Uani 1 1 d D . . . .
 C28A C 0.1003(8) -0.0615(4) 0.9858(5) 0.075(2) Uani 0.74(3) 1 d D . P E 1
 C6A C 0.8965(3) 0.4032(4) 0.5849(2) 0.0779(13) Uani 1 1 d D . . . .
 H6A H 0.950341 0.364087 0.584791 0.093 Uiso 1 1 calc R U . . .
 C4B C 1.1159(4) -0.0088(3) 0.5645(3) 0.0821(13) Uani 1 1 d . . . . .
 H4B H 1.115366 -0.022663 0.611547 0.098 Uiso 1 1 calc R U . . .
 C24A C 0.1278(3) 0.0371(4) 0.8884(3) 0.0835(15) Uani 1 1 d . . . . .
 H24A H 0.118924 0.014142 0.852082 0.100 Uiso 1 1 calc R U . . .
 C9B C 0.8717(4) 0.1737(4) 0.7041(2) 0.0861(17) Uani 1 1 d . . . . .
 H9B H 0.892831 0.142293 0.746107 0.103 Uiso 1 1 calc R U . . .
 C20A C 0.1866(17) 0.3370(10) 0.7773(11) 0.075(5) Uani 0.488(12) 1 d D . P A
 1
 H20A H 0.145571 0.358708 0.807726 0.090 Uiso 0.488(12) 1 calc R U P A 1
 C24C C 0.2967(4) 0.1533(4) 1.1588(3) 0.0909(17) Uani 1 1 d . . . . .
 H24C H 0.344789 0.128648 1.189157 0.109 Uiso 1 1 calc R U . . .
 C27B C -0.1239(10) 0.5510(9) 0.9178(10) 0.048(4) Uani 0.38(4) 1 d D . P B 1
 H27B H -0.079335 0.575506 0.919867 0.058 Uiso 0.38(4) 1 calc R U P B 1
 C5A C 1.0119(4) 0.6256(4) 0.5713(2) 0.0862(14) Uani 1 1 d D . . . .
 H5A H 0.999935 0.680530 0.567122 0.103 Uiso 1 1 calc R U . . .
 C4A C 0.9417(3) 0.5951(4) 0.5724(2) 0.0846(14) Uani 1 1 d D . . . .
 H4A H 0.883825 0.628514 0.568449 0.102 Uiso 1 1 calc R U . . .
 C10B C 0.7678(10) 0.2305(9) 0.7660(6) 0.060(3) Uani 0.457(19) 1 d D . P C 1
 C6C C 0.7237(4) 0.3565(3) 0.4293(3) 0.0875(15) Uiso 1 1 d . . . . .
 H6C H 0.762360 0.387795 0.420489 0.105 Uiso 1 1 calc R U . . .
 C8C C 0.6552(4) 0.2765(4) 0.4802(3) 0.0913(15) Uiso 1 1 d . . . . .
 C18B C 0.4063(10) 0.2889(14) 0.8823(9) 0.074(6) Uani 0.457(19) 1 d D . P C 1
 H18B H 0.375218 0.285782 0.844432 0.089 Uiso 0.457(19) 1 calc R U P C 1
 C29B C -0.1748(9) 0.4363(11) 0.9275(14) 0.054(5) Uani 0.38(4) 1 d D . P B 1
 H29B H -0.163595 0.381120 0.935577 0.065 Uiso 0.38(4) 1 calc R U P B 1
 C1B C 1.1235(4) 0.0254(3) 0.4308(3) 0.0835(14) Uani 1 1 d . . . . .
 H1B H 1.126516 0.038312 0.383841 0.100 Uiso 1 1 calc R U . . .
 C28C C 0.1855(4) 0.2037(3) 1.2387(2) 0.0894(16) Uani 1 1 d D . . . .
 C21A C 0.2162(13) 0.3859(10) 0.7274(9) 0.072(4) Uani 0.488(12) 1 d D . P A 1
 H21A H 0.196139 0.441158 0.722540 0.087 Uiso 0.488(12) 1 calc R U P A 1
 C10C C 0.6499(9) 0.1749(8) 0.6519(6) 0.081(4) Uani 0.524(7) 1 d D . P D 1
 C29A C 0.0969(9) -0.0829(6) 1.0535(6) 0.083(3) Uani 0.74(3) 1 d D . P E 1
 H29A H 0.104405 -0.049409 1.082052 0.099 Uiso 0.74(3) 1 calc R U P E 1
 C19B C 0.3628(7) 0.3009(10) 0.9402(7) 0.061(4) Uani 0.457(19) 1 d D . P C 1
 C22C C 0.3617(4) 0.1252(4) 1.0487(3) 0.0942(18) Uani 1 1 d . . . . .
 H22C H 0.418695 0.097306 1.065978 0.113 Uiso 1 1 calc R U . . .
 C9C C 0.6319(4) 0.2262(4) 0.5351(3) 0.0909(15) Uiso 1 1 d . . . . .
 H9C H 0.590973 0.198855 0.529471 0.109 Uiso 1 1 calc R U . . .
 N8C N 0.1290(6) 0.2298(4) 1.3640(3) 0.131(2) Uani 1 1 d D . . . .
 C5B C 1.1739(4) -0.0567(4) 0.5278(3) 0.0917(16) Uani 1 1 d . . . . .
 H5B H 1.213428 -0.103023 0.551315 0.110 Uiso 1 1 calc R U . . .
 C16C C 0.5415(7) 0.0654(8) 0.8621(5) 0.067(3) Uani 0.524(7) 1 d D . P D 1
 C30A C 0.0825(9) -0.1533(6) 1.0796(7) 0.081(3) Uani 0.74(3) 1 d D . P E 1
 H30A H 0.082616 -0.167680 1.126637 0.097 Uiso 0.74(3) 1 calc R U P E 1
 C16A C 0.2766(11) 0.3497(10) 0.6854(7) 0.069(4) Uani 0.488(12) 1 d D . P A 1
 C18A C 0.2770(10) 0.2196(10) 0.7405(6) 0.072(3) Uani 0.488(12) 1 d D . P A 1
 H18A H 0.297721 0.164366 0.745909 0.087 Uiso 0.488(12) 1 calc R U P A 1
 C11B C 0.7559(9) 0.1688(10) 0.8124(5) 0.060(3) Uani 0.457(19) 1 d D . P C 1
 H11B H 0.779092 0.116591 0.805727 0.072 Uiso 0.457(19) 1 calc R U P C 1
 C13A C 0.3907(8) 0.3938(11) 0.6348(6) 0.083(6) Uani 0.488(12) 1 d D . P A 1
 C15B C 0.7343(9) 0.3080(10) 0.7742(7) 0.066(3) Uani 0.457(19) 1 d D . P C 1
 H15B H 0.744086 0.349171 0.741964 0.079 Uiso 0.457(19) 1 calc R U P C 1
 C14B C 0.6868(7) 0.3246(11) 0.8298(6) 0.060(3) Uani 0.457(19) 1 d D . P C 1
 H14B H 0.662972 0.376948 0.835786 0.072 Uiso 0.457(19) 1 calc R U P C 1
 C13B C 0.6745(7) 0.2618(11) 0.8772(5) 0.057(3) Uani 0.457(19) 1 d D . P C 1
 C29C C 0.0978(5) 0.2375(5) 1.2486(3) 0.110(2) Uani 1 1 d D . . . .
 H29C H 0.055859 0.251532 1.213005 0.132 Uiso 1 1 calc R U . . .
 C10A C 0.5639(6) 0.3889(7) 0.6211(5) 0.060(3) Uani 0.488(12) 1 d D . P A 1
 C17B C 0.4940(9) 0.2815(10) 0.8787(7) 0.070(5) Uani 0.457(19) 1 d D . P C 1
 H17B H 0.522696 0.274713 0.838264 0.084 Uiso 0.457(19) 1 calc R U P C 1
 C17A C 0.3046(10) 0.2692(9) 0.6900(7) 0.077(4) Uani 0.488(12) 1 d D . P A 1
 H17A H 0.343179 0.247560 0.658212 0.092 Uiso 0.488(12) 1 calc R U P A 1
 C12B C 0.7092(8) 0.1845(10) 0.8693(6) 0.062(3) Uani 0.457(19) 1 d D . P C 1
 H12B H 0.701279 0.142983 0.902050 0.075 Uiso 0.457(19) 1 calc R U P C 1
 C19C C 0.4153(6) 0.1208(6) 0.9444(5) 0.066(3) Uani 0.524(7) 1 d D . P D 1
 C30B C -0.2588(10) 0.4856(11) 0.9116(10) 0.057(4) Uani 0.38(4) 1 d D . P B 1
 H30B H -0.305274 0.463218 0.910210 0.069 Uiso 0.38(4) 1 calc R U P B 1
 O1C O 0.6066(4) 0.0366(5) 0.8186(3) 0.086(3) Uani 0.524(7) 1 d D . P D 1
 C18C C 0.4994(5) 0.1175(6) 0.9608(5) 0.064(2) Uani 0.524(7) 1 d D . P D 1
 H18C H 0.512764 0.133622 0.999914 0.077 Uiso 0.524(7) 1 calc R U P D 1
 C26B C -0.2102(11) 0.5930(10) 0.9014(11) 0.056(4) Uani 0.38(4) 1 d D . P B 1
 H26B H -0.223372 0.648331 0.891405 0.068 Uiso 0.38(4) 1 calc R U P B 1
 C30C C 0.0738(6) 0.2499(5) 1.3121(3) 0.116(2) Uani 1 1 d D . . . .
 H30C H 0.014306 0.274235 1.318779 0.140 Uiso 1 1 calc R U . . .
 C16B C 0.5395(6) 0.2841(9) 0.9334(6) 0.064(3) Uani 0.457(19) 1 d D . P C 1
 C27A C 0.0843(9) -0.1139(4) 0.9476(5) 0.079(3) Uani 0.74(3) 1 d D . P E 1
 H27A H 0.084357 -0.101564 0.900458 0.095 Uiso 0.74(3) 1 calc R U P E 1
 C26A C 0.0690(10) -0.1813(5) 0.9777(7) 0.096(4) Uani 0.74(3) 1 d D . P E 1
 H26A H 0.058159 -0.214807 0.950404 0.115 Uiso 0.74(3) 1 calc R U P E 1
 C7C C 0.6208(6) 0.3022(5) 0.4164(4) 0.120(2) Uiso 1 1 d . . . . .
 H7C H 0.574452 0.288647 0.398321 0.144 Uiso 1 1 calc R U . . .
 C27C C 0.2460(6) 0.1825(5) 1.2919(3) 0.125(2) Uani 1 1 d D . . . .
 H27C H 0.306105 0.159044 1.286699 0.151 Uiso 1 1 calc R U . . .
 C20B C 0.4111(6) 0.2976(11) 0.9952(7) 0.072(4) Uani 0.457(19) 1 d D . P C 1
 H20B H 0.384184 0.298401 1.036925 0.086 Uiso 0.457(19) 1 calc R U P C 1
 C17C C 0.5637(6) 0.0895(5) 0.9177(4) 0.064(2) Uani 0.524(7) 1 d D . P D 1
 H17C H 0.622419 0.086938 0.926463 0.077 Uiso 0.524(7) 1 calc R U P D 1
 C13C C 0.6153(5) 0.0887(6) 0.7619(4) 0.071(2) Uani 0.524(7) 1 d D . P D 1
 C21B C 0.4983(6) 0.2932(11) 0.9917(6) 0.071(4) Uani 0.457(19) 1 d D . P C 1
 H21B H 0.529437 0.296396 1.029506 0.085 Uiso 0.457(19) 1 calc R U P C 1
 C20C C 0.3922(6) 0.0956(6) 0.8889(5) 0.074(2) Uani 0.524(7) 1 d D . P D 1
 H20C H 0.333559 0.097658 0.880497 0.089 Uiso 0.524(7) 1 calc R U P D 1
 C11C C 0.5814(6) 0.2103(6) 0.6871(4) 0.080(3) Uani 0.524(7) 1 d D . P D 1
 H11C H 0.548057 0.263102 0.673047 0.096 Uiso 0.524(7) 1 calc R U P D 1
 C21C C 0.4569(6) 0.0673(7) 0.8463(5) 0.082(3) Uani 0.524(7) 1 d D . P D 1
 H21C H 0.443970 0.049894 0.807808 0.099 Uiso 0.524(7) 1 calc R U P D 1
 C12C C 0.5638(6) 0.1646(5) 0.7439(4) 0.080(3) Uani 0.524(7) 1 d D . P D 1
 H12C H 0.516813 0.185170 0.770448 0.096 Uiso 0.524(7) 1 calc R U P D 1
 C11A C 0.5348(5) 0.3596(8) 0.6813(4) 0.078(4) Uani 0.488(12) 1 d D . P A 1
 H11A H 0.574650 0.337743 0.718240 0.094 Uiso 0.488(12) 1 calc R U P A 1
 C12A C 0.4479(6) 0.3615(9) 0.6889(5) 0.090(5) Uani 0.488(12) 1 d D . P A 1
 H12A H 0.428274 0.341061 0.730500 0.108 Uiso 0.488(12) 1 calc R U P A 1
 C26C C 0.2129(8) 0.1979(6) 1.3534(3) 0.150(3) Uani 1 1 d D . . . .
 H26C H 0.252915 0.184664 1.390179 0.180 Uiso 1 1 calc R U . . .
 Cl2G Cl 0.92133(9) -0.04523(8) 0.80457(7) 0.0829(4) Uani 1 1 d . . . . .
 Cl1G Cl 0.38567(16) 0.28222(14) 0.45224(9) 0.1249(7) Uani 1 1 d . . . . .
 O7G O 0.8933(2) -0.0346(3) 0.73693(19) 0.0888(10) Uani 1 1 d . . . . .
 O8G O 0.9700(3) -0.1248(3) 0.8288(2) 0.1104(14) Uani 1 1 d . . . . .
 O6G O 0.8459(3) -0.0291(4) 0.8448(2) 0.1266(18) Uani 1 1 d . . . . .
 O5G O 0.9724(3) 0.0078(3) 0.8109(3) 0.1106(15) Uani 1 1 d . . . . .
 O2G O 0.4075(5) 0.3536(4) 0.4325(3) 0.145(2) Uani 1 1 d . . . . .
 O1G O 0.2947(4) 0.2963(4) 0.4454(3) 0.1342(19) Uani 1 1 d . . . . .
 O4G O 0.4134(6) 0.2479(5) 0.5182(3) 0.191(4) Uani 1 1 d . . . . .
 O3G O 0.4295(6) 0.2312(5) 0.4077(5) 0.199(3) Uani 1 1 d . . . . .
 C10F C 0.6376(8) 0.1617(8) 0.6408(6) 0.073(5) Uani 0.476(7) 1 d D . P D 2
 C11F C 0.5533(6) 0.1676(7) 0.6605(6) 0.088(4) Uani 0.476(7) 1 d D . P D 2
 H11F H 0.508745 0.211016 0.638202 0.105 Uiso 0.476(7) 1 calc R U P D 2
 C15F C 0.6985(9) 0.0961(8) 0.6763(9) 0.067(4) Uani 0.476(7) 1 d D . P D 2
 H15F H 0.758142 0.087728 0.666522 0.080 Uiso 0.476(7) 1 calc R U P D 2
 C12F C 0.5282(7) 0.1164(7) 0.7093(7) 0.098(4) Uani 0.476(7) 1 d D . P D 2
 H12F H 0.468505 0.124813 0.718997 0.117 Uiso 0.476(7) 1 calc R U P D 2
 C14F C 0.6754(10) 0.0423(11) 0.7256(11) 0.072(4) Uani 0.476(7) 1 d D . P D 2
 H14F H 0.719195 -0.002529 0.746861 0.087 Uiso 0.476(7) 1 calc R U P D 2
 C13F C 0.5902(6) 0.0525(6) 0.7443(6) 0.075(3) Uani 0.476(7) 1 d D . P D 2
 O1F O 0.5679(6) -0.0032(4) 0.7921(4) 0.087(3) Uani 0.476(7) 1 d D . P D 2
 C16F C 0.5152(7) 0.0284(6) 0.8427(6) 0.080(3) Uani 0.476(7) 1 d D . P D 2
 C21F C 0.4347(5) 0.0130(6) 0.8499(4) 0.069(2) Uani 0.476(7) 1 d D . P D 2
 H21F H 0.416980 -0.017302 0.822812 0.083 Uiso 0.476(7) 1 calc R U P D 2
 C20F C 0.3814(6) 0.0443(7) 0.8990(4) 0.066(2) Uani 0.476(7) 1 d D . P D 2
 H20F H 0.326493 0.034308 0.904559 0.080 Uiso 0.476(7) 1 calc R U P D 2
 C19F C 0.4039(6) 0.0889(6) 0.9398(5) 0.058(2) Uani 0.476(7) 1 d D . P D 2
 C18F C 0.4858(7) 0.0998(7) 0.9327(7) 0.077(3) Uani 0.476(7) 1 d D . P D 2
 H18F H 0.504109 0.128496 0.961122 0.092 Uiso 0.476(7) 1 calc R U P D 2
 C17F C 0.5420(9) 0.0700(10) 0.8852(9) 0.085(5) Uani 0.476(7) 1 d D . P D 2
 H17F H 0.597993 0.077826 0.881573 0.102 Uiso 0.476(7) 1 calc R U P D 2
 O1E O 0.6128(5) 0.3295(10) 0.9161(5) 0.077(3) Uani 0.543(19) 1 d D . P C 2
 C13E C 0.6597(7) 0.3066(10) 0.8626(6) 0.066(3) Uani 0.543(19) 1 d D . P C 2
 C14E C 0.6742(7) 0.3646(10) 0.8119(6) 0.072(3) Uani 0.543(19) 1 d D . P C 2
 H14E H 0.651019 0.418239 0.814448 0.086 Uiso 0.543(19) 1 calc R U P C 2
 C15E C 0.7231(9) 0.3426(10) 0.7576(7) 0.074(3) Uani 0.543(19) 1 d D . P C 2
 H15E H 0.734329 0.381074 0.723234 0.089 Uiso 0.543(19) 1 calc R U P C 2
 C10E C 0.7550(10) 0.2636(9) 0.7547(6) 0.066(3) Uani 0.543(19) 1 d D . P C 2
 C11E C 0.7392(8) 0.2070(10) 0.8052(5) 0.068(3) Uani 0.543(19) 1 d D . P C 2
 H11E H 0.760333 0.153454 0.801845 0.082 Uiso 0.543(19) 1 calc R U P C 2
 C12E C 0.6930(8) 0.2276(11) 0.8604(6) 0.071(3) Uani 0.543(19) 1 d D . P C 2
 H12E H 0.684430 0.188868 0.895694 0.085 Uiso 0.543(19) 1 calc R U P C 2
 C16E C 0.5263(7) 0.3261(10) 0.9178(5) 0.070(3) Uani 0.543(19) 1 d D . P C 2
 C17E C 0.4828(8) 0.3133(10) 0.8670(6) 0.065(3) Uani 0.543(19) 1 d D . P C 2
 H17E H 0.511577 0.304005 0.827013 0.078 Uiso 0.543(19) 1 calc R U P C 2
 C18E C 0.3974(9) 0.3136(13) 0.8729(7) 0.074(5) Uani 0.543(19) 1 d D . P C 2
 H18E H 0.368646 0.300994 0.838306 0.089 Uiso 0.543(19) 1 calc R U P C 2
 C19E C 0.3530(7) 0.3321(9) 0.9289(6) 0.061(3) Uani 0.543(19) 1 d D . P C 2
 C20E C 0.3963(7) 0.3492(11) 0.9780(5) 0.083(4) Uani 0.543(19) 1 d D . P C 2
 H20E H 0.366683 0.362685 1.016623 0.100 Uiso 0.543(19) 1 calc R U P C 2
 C21E C 0.4824(7) 0.3471(12) 0.9722(6) 0.086(4) Uani 0.543(19) 1 d D . P C 2
 H21E H 0.511350 0.360311 1.006343 0.103 Uiso 0.543(19) 1 calc R U P C 2
 C16D C 0.2739(13) 0.3809(9) 0.6931(8) 0.081(4) Uani 0.512(12) 1 d D . P A 2
 C21D C 0.2108(16) 0.4056(11) 0.7382(9) 0.081(5) Uani 0.512(12) 1 d D . P A 2
 H21D H 0.183605 0.459690 0.736179 0.097 Uiso 0.512(12) 1 calc R U P A 2
 C20D C 0.1873(18) 0.3496(9) 0.7871(12) 0.076(5) Uani 0.512(12) 1 d D . P A 2
 H20D H 0.144931 0.367436 0.818067 0.092 Uiso 0.512(12) 1 calc R U P A 2
 C19D C 0.2240(13) 0.2693(9) 0.7916(8) 0.069(4) Uani 0.512(12) 1 d D . P A 2
 C18D C 0.2870(10) 0.2460(9) 0.7452(7) 0.075(4) Uani 0.512(12) 1 d D . P A 2
 H18D H 0.313738 0.191890 0.746362 0.090 Uiso 0.512(12) 1 calc R U P A 2
 C17D C 0.3112(10) 0.3012(10) 0.6969(7) 0.080(4) Uani 0.512(12) 1 d D . P A 2
 H17D H 0.354011 0.283591 0.666186 0.096 Uiso 0.512(12) 1 calc R U P A 2
 O1D O 0.2960(6) 0.4331(7) 0.6430(5) 0.077(3) Uani 0.512(12) 1 d D . P A 2
 C13D C 0.3845(8) 0.4228(11) 0.6309(7) 0.086(5) Uani 0.512(12) 1 d D . P A 2
 C12D C 0.4356(5) 0.4370(8) 0.6779(5) 0.095(4) Uani 0.512(12) 1 d D . P A 2
 H12D H 0.411678 0.447865 0.719029 0.113 Uiso 0.512(12) 1 calc R U P A 2
 C11D C 0.5204(6) 0.4357(8) 0.6661(5) 0.092(4) Uani 0.512(12) 1 d D . P A 2
 H11D H 0.555149 0.444775 0.699059 0.110 Uiso 0.512(12) 1 calc R U P A 2
 C10D C 0.5546(6) 0.4210(8) 0.6059(6) 0.068(3) Uani 0.512(12) 1 d D . P A 2
 C15D C 0.5045(9) 0.4059(14) 0.5595(7) 0.065(4) Uani 0.512(12) 1 d D . P A 2
 H15D H 0.529036 0.394511 0.518632 0.078 Uiso 0.512(12) 1 calc R U P A 2
 C14D C 0.4192(9) 0.4071(16) 0.5709(7) 0.073(5) Uani 0.512(12) 1 d D . P A 2
 H14D H 0.384937 0.397162 0.538152 0.088 Uiso 0.512(12) 1 calc R U P A 2
 O1ET O -0.0294(5) 0.4239(4) 0.7871(4) 0.154(2) Uiso 1 1 d D . . . .
 C1ET C -0.0287(7) 0.2957(6) 0.7879(5) 0.143(3) Uiso 1 1 d D . . . .
 C2ET C -0.0663(7) 0.3762(6) 0.7599(5) 0.150(3) Uiso 1 1 d D . . . .
 C3ET C -0.0408(9) 0.5060(7) 0.7566(7) 0.171(4) Uiso 1 1 d D . . . .
 C4ET C -0.1287(11) 0.5532(10) 0.7392(10) 0.244(7) Uiso 1 1 d D . . . .
 C3C C 0.6468(6) 0.4085(6) 0.3251(5) 0.076(3) Uiso 0.524(8) 1 d D . P F 1
 C4C C 0.5611(7) 0.4406(6) 0.3017(5) 0.093(3) Uiso 0.524(8) 1 d D . P F 1
 H4C H 0.514195 0.430935 0.327465 0.112 Uiso 0.524(8) 1 calc R U P F 1
 C2C C 0.7158(7) 0.4225(7) 0.2870(6) 0.093(3) Uiso 0.524(8) 1 d D . P F 1
 H2C H 0.774717 0.400801 0.302402 0.112 Uiso 0.524(8) 1 calc R U P F 1
 C1C C 0.6923(9) 0.4701(8) 0.2253(6) 0.111(4) Uiso 0.524(8) 1 d D . P F 1
 H1C H 0.737273 0.481220 0.197903 0.133 Uiso 0.524(8) 1 calc R U P F 1
 C5C C 0.5470(10) 0.4870(9) 0.2394(6) 0.121(5) Uiso 0.524(8) 1 d D . P F 1
 H5C H 0.488978 0.509860 0.222302 0.145 Uiso 0.524(8) 1 calc R U P F 1
 N1C N 0.6112(8) 0.5009(8) 0.2024(7) 0.129(4) Uiso 0.524(8) 1 d D . P F 1
 C3F C 0.6497(7) 0.3705(8) 0.3105(5) 0.086(3) Uiso 0.476(8) 1 d D . P F 2
 C4F C 0.5654(9) 0.3884(9) 0.2849(7) 0.110(4) Uiso 0.476(8) 1 d D . P F 2
 H4F H 0.520807 0.376263 0.312175 0.132 Uiso 0.476(8) 1 calc R U P F 2
 C2F C 0.7093(10) 0.3948(11) 0.2682(7) 0.128(6) Uiso 0.476(8) 1 d D . P F 2
 H2F H 0.767364 0.386993 0.283149 0.153 Uiso 0.476(8) 1 calc R U P F 2
 C1F C 0.6814(11) 0.4308(9) 0.2032(8) 0.130(6) Uiso 0.476(8) 1 d D . P F 2
 H1F H 0.722995 0.446357 0.174472 0.157 Uiso 0.476(8) 1 calc R U P F 2
 C5F C 0.5471(10) 0.4247(10) 0.2184(7) 0.119(5) Uiso 0.476(8) 1 d D . P F 2
 H5F H 0.489506 0.435004 0.201403 0.143 Uiso 0.476(8) 1 calc R U P F 2
 N1F N 0.6033(10) 0.4451(9) 0.1784(7) 0.140(5) Uiso 0.476(8) 1 d D . P F 2
 C28E C -0.1130(8) 0.4600(9) 0.9281(9) 0.075(4) Uani 0.62(4) 1 d D . P B 2
 N8E N -0.2925(11) 0.5376(14) 0.9154(10) 0.095(5) Uani 0.62(4) 1 d D . P B 2
 C27E C -0.1432(14) 0.5415(9) 0.9077(8) 0.083(4) Uani 0.62(4) 1 d D . P B 2
 H27E H -0.104178 0.572241 0.897566 0.099 Uiso 0.62(4) 1 calc R U P B 2
 C29E C -0.1740(8) 0.4181(13) 0.9424(14) 0.090(5) Uani 0.62(4) 1 d D . P B 2
 H29E H -0.156518 0.363020 0.956824 0.108 Uiso 0.62(4) 1 calc R U P B 2
 C30E C -0.2620(9) 0.4612(15) 0.9345(14) 0.103(5) Uani 0.62(4) 1 d D . P B 2
 H30E H -0.303471 0.432739 0.943807 0.124 Uiso 0.62(4) 1 calc R U P B 2
 C26E C -0.2336(15) 0.5753(13) 0.9030(8) 0.099(5) Uani 0.62(4) 1 d D . P B 2
 H26E H -0.254099 0.630417 0.889548 0.119 Uiso 0.62(4) 1 calc R U P B 2
 N8D N 0.0910(15) -0.2067(10) 1.0134(14) 0.067(5) Uani 0.26(3) 1 d D . P E 2
 C28D C 0.120(2) -0.0683(10) 0.9766(11) 0.075(2) Uani 0.26(3) 1 d D . P E 2
 C29D C 0.099(3) -0.0896(16) 1.0416(13) 0.092(10) Uani 0.26(3) 1 d D . P E 2
 H29D H 0.095251 -0.056630 1.073238 0.110 Uiso 0.26(3) 1 calc R U P E 2
 C30D C 0.085(2) -0.1615(14) 1.0577(15) 0.078(7) Uani 0.26(3) 1 d D . P E 2
 H30D H 0.071305 -0.179260 1.101996 0.094 Uiso 0.26(3) 1 calc R U P E 2
 C27D C 0.1252(15) -0.1132(8) 0.9279(10) 0.059(5) Uani 0.26(3) 1 d D . P E 2
 H27D H 0.137185 -0.096408 0.882876 0.071 Uiso 0.26(3) 1 calc R U P E 2
 C26D C 0.1116(15) -0.1835(9) 0.9513(12) 0.070(6) Uani 0.26(3) 1 d D . P E 2
 H26D H 0.117125 -0.218556 0.921242 0.084 Uiso 0.26(3) 1 calc R U P E 2
 Cl4G Cl 0.1163(2) 0.63697(13) 0.87190(12) 0.0831(9) Uani 0.681(9) 1 d DG . P G
 1
 O15G O 0.1580(4) 0.6926(3) 0.8873(3) 0.113(3) Uani 0.681(9) 1 d DG . P G 1
 O14G O 0.1708(3) 0.55879(17) 0.8961(3) 0.101(2) Uani 0.681(9) 1 d DG . P G 1
 O13G O 0.0336(3) 0.6481(3) 0.9033(3) 0.0897(18) Uani 0.681(9) 1 d DG . P G 1
 O16G O 0.1030(3) 0.6484(4) 0.80088(12) 0.106(2) Uani 0.681(9) 1 d DG . P G 1
 Cl3G Cl 0.24810(18) -0.0122(2) 0.72826(14) 0.0950(9) Uiso 0.602(7) 1 d DG . P H
 1
 O10G O 0.3022(4) 0.0397(4) 0.7180(4) 0.177(5) Uiso 0.602(7) 1 d DG . P H 1
 O11G O 0.2692(5) -0.0624(4) 0.7925(2) 0.131(3) Uiso 0.602(7) 1 d DG . P H 1
 O9G O 0.1579(2) 0.0330(4) 0.7252(4) 0.135(3) Uiso 0.602(7) 1 d DG . P H 1
 O12G O 0.2630(5) -0.0590(4) 0.6771(3) 0.139(3) Uiso 0.602(7) 1 d DG . P H 1
 Cl3H Cl 0.24943(19) 0.0186(2) 0.71691(16) 0.0711(11) Uiso 0.398(7) 1 d DG . P H
 2
 O10H O 0.3044(4) 0.0501(4) 0.7516(3) 0.080(3) Uiso 0.398(7) 1 d DG . P H 2
 O11H O 0.2354(5) -0.0491(3) 0.7593(4) 0.142(5) Uiso 0.398(7) 1 d DG . P H 2
 O9H O 0.1671(3) 0.0768(4) 0.6992(4) 0.084(3) Uiso 0.398(7) 1 d DG . P H 2
 O12H O 0.2909(5) -0.0035(5) 0.6575(3) 0.112(4) Uiso 0.398(7) 1 d DG . P H 2
 Cl4H Cl 0.0815(5) 0.6301(3) 0.8568(3) 0.0842(19) Uani 0.319(9) 1 d DG . P G
 2
 O15H O 0.0978(8) 0.7040(4) 0.8318(8) 0.154(10) Uani 0.319(9) 1 d DG . P G 2
 O14H O 0.1363(8) 0.5908(8) 0.9151(4) 0.107(5) Uani 0.319(9) 1 d DG . P G 2
 O13H O -0.0085(5) 0.6433(6) 0.8737(6) 0.093(4) Uani 0.319(9) 1 d DG . P G 2
 O16H O 0.1002(7) 0.5823(8) 0.8063(5) 0.118(5) Uani 0.319(9) 1 d DG . P G 2
 N1S2 N 0.1258(4) 0.7781(3) 0.6256(3) 0.0942(14) Uani 1 1 d . . . . .
 C1S2 C 0.1377(5) 0.7939(4) 0.6733(3) 0.0926(17) Uani 1 1 d . . . . .
 C2S2 C 0.1571(10) 0.8162(7) 0.7363(4) 0.177(5) Uani 1 1 d . . . . .
 H2SA H 0.186339 0.857245 0.726597 0.266 Uiso 1 1 calc R U . . .
 H2SB H 0.194939 0.770482 0.765503 0.266 Uiso 1 1 calc R U . . .
 H2SC H 0.102671 0.835561 0.758512 0.266 Uiso 1 1 calc R U . . .
 C1EV C 0.6407(10) -0.0153(10) 0.5243(10) 0.143(8) Uiso 0.5 1 d G . P I -1
 C2EV C 0.5530(11) 0.0462(8) 0.5111(13) 0.252(15) Uiso 0.5 1 d G . P I -1
 O1EV O 0.4910(10) 0.0110(7) 0.4925(8) 0.127(3) Uiso 0.5 1 d G . P I -1
 C3EV C 0.4063(10) 0.0636(10) 0.4788(11) 0.175(8) Uiso 0.5 1 d G . P I -1
 C4EV C 0.3459(12) 0.0197(14) 0.4596(16) 0.29(3) Uiso 0.5 1 d G . P I -1
 C1S1 C 0.1418(5) 0.2249(5) 0.5762(3) 0.103(2) Uani 1 1 d . . . . .
 N1S1 N 0.0814(4) 0.2657(5) 0.5903(4) 0.133(2) Uani 1 1 d . . . . .
 C2S1 C 0.2194(6) 0.1694(6) 0.5576(5) 0.134(3) Uani 1 1 d . . . . .
 H2SD H 0.204775 0.147459 0.520613 0.201 Uiso 1 1 calc R U . . .
 H2SE H 0.242041 0.127284 0.595702 0.201 Uiso 1 1 calc R U . . .
 H2SF H 0.263689 0.196178 0.543900 0.201 Uiso 1 1 calc R U . . .
 N1S4 N 0.3129(6) -0.1201(8) 0.9728(4) 0.125(4) Uani 0.661(9) 1 d D . P J 1
 C1S4 C 0.3110(8) -0.1642(9) 0.9382(6) 0.126(4) Uani 0.661(9) 1 d D . P J 1
 C2S4 C 0.3124(14) -0.2203(12) 0.8949(10) 0.193(8) Uani 0.661(9) 1 d D . P J
 1
 H2SG H 0.300165 -0.266712 0.920960 0.290 Uiso 0.661(9) 1 calc R U P J 1
 H2SH H 0.369779 -0.235329 0.875769 0.290 Uiso 0.661(9) 1 calc R U P J 1
 H2SI H 0.268017 -0.196304 0.859124 0.290 Uiso 0.661(9) 1 calc R U P J 1
 C1S5 C 0.5023(8) 0.0042(7) 0.6776(6) 0.091(3) Uiso 0.5 1 d . . P K 1
 N1S5 N 0.5313(8) -0.0496(7) 0.7179(6) 0.107(3) Uiso 0.5 1 d . . P K 1
 C2S5 C 0.4620(9) 0.0756(8) 0.6333(7) 0.100(3) Uiso 0.5 1 d . . P K 1
 H2SJ H 0.473973 0.068858 0.587379 0.150 Uiso 0.5 1 calc R U P K 1
 H2SK H 0.485225 0.116900 0.643034 0.150 Uiso 0.5 1 calc R U P K 1
 H2SL H 0.399025 0.090196 0.639235 0.150 Uiso 0.5 1 calc R U P K 1
 C1T4 C 0.3550(10) -0.0807(9) 0.9403(7) 0.081(4) Uani 0.339(9) 1 d D . P J 2
 N1T4 N 0.3217(8) -0.0567(8) 0.9870(6) 0.081(4) Uani 0.339(9) 1 d D . P J 2
 C2T4 C 0.3953(11) -0.1093(11) 0.8819(7) 0.088(5) Uani 0.339(9) 1 d D . P J 2
 H2TA H 0.457859 -0.133165 0.891118 0.132 Uiso 0.339(9) 1 calc R U P J 2
 H2TB H 0.386055 -0.065696 0.844169 0.132 Uiso 0.339(9) 1 calc R U P J 2
 H2TC H 0.369209 -0.148383 0.871152 0.132 Uiso 0.339(9) 1 calc R U P J 2
 N1S3 N 0.6693(9) 0.5292(8) 0.7320(7) 0.109(4) Uiso 0.52(2) 1 d DG . P L 1
 C1S3 C 0.6889(7) 0.5864(6) 0.7295(5) 0.086(4) Uiso 0.52(2) 1 d DG . P L 1
 C2S3 C 0.7134(15) 0.6579(7) 0.7264(9) 0.149(8) Uiso 0.52(2) 1 d DG . P L 1
 N1T3 N 0.6652(12) 0.5025(9) 0.7357(9) 0.137(6) Uiso 0.48(2) 1 d DG . P L 2
 C1T3 C 0.6547(10) 0.5684(8) 0.7357(7) 0.101(5) Uiso 0.48(2) 1 d DG . P L 2
 C2T3 C 0.642(2) 0.6509(9) 0.7358(13) 0.201(13) Uiso 0.48(2) 1 d DG . P L 2

loop_
  _atom_site_aniso_label
  _atom_site_aniso_U_11
  _atom_site_aniso_U_22
  _atom_site_aniso_U_33
  _atom_site_aniso_U_23
  _atom_site_aniso_U_13
  _atom_site_aniso_U_12
 Mn2 0.0509(4) 0.0887(5) 0.0651(5) -0.0207(4) 0.0001(3) -0.0163(3)
 Mn1 0.0481(4) 0.1743(10) 0.0801(5) -0.0686(6) 0.0085(4) -0.0305(5)
 N7B 0.066(2) 0.067(2) 0.0497(18) -0.0139(15) 0.0038(15) -0.0152(16)
 N2B 0.059(2) 0.094(3) 0.0519(18) -0.0206(18) 0.0070(15) -0.0288(19)
 N2A 0.0461(18) 0.138(3) 0.0441(18) -0.021(2) 0.0008(14) -0.018(2)
 N6B 0.057(2) 0.075(2) 0.066(2) -0.0200(17) 0.0043(16) -0.0211(17)
 N6A 0.058(2) 0.084(3) 0.071(2) -0.023(2) -0.0076(17) -0.0153(18)
 N3B 0.058(2) 0.120(3) 0.053(2) -0.033(2) 0.0051(16) -0.030(2)
 N6C 0.074(2) 0.094(3) 0.066(2) -0.017(2) 0.0013(19) -0.043(2)
 N7A 0.061(2) 0.092(3) 0.087(3) -0.037(2) -0.015(2) -0.015(2)
 N5A 0.0499(19) 0.114(3) 0.062(2) -0.019(2) -0.0017(16) -0.020(2)
 N3A 0.050(2) 0.159(4) 0.061(2) -0.043(3) 0.0091(17) -0.028(2)
 N3C 0.0459(19) 0.103(3) 0.091(3) -0.035(2) -0.0071(18) -0.0105(19)
 N5B 0.057(2) 0.120(3) 0.064(2) -0.034(2) 0.0129(17) -0.034(2)
 N1A 0.071(2) 0.139(4) 0.049(2) -0.005(2) -0.0002(18) -0.036(3)
 O1A 0.041(4) 0.108(8) 0.078(6) -0.002(6) -0.003(3) -0.011(5)
 N7C 0.109(4) 0.101(3) 0.060(2) -0.016(2) 0.004(2) -0.064(3)
 N4B 0.055(2) 0.173(5) 0.064(2) -0.057(3) 0.0146(19) -0.048(3)
 N4C 0.055(2) 0.134(4) 0.056(2) -0.034(2) 0.0010(17) -0.008(2)
 N1B 0.086(3) 0.089(3) 0.088(3) -0.036(2) 0.008(2) -0.024(2)
 C25B 0.055(2) 0.071(3) 0.066(2) -0.016(2) 0.0025(19) -0.0172(19)
 C23B 0.067(3) 0.084(3) 0.056(2) -0.020(2) 0.0070(19) -0.030(2)
 N5C 0.050(2) 0.148(4) 0.061(2) -0.002(2) 0.0001(17) -0.013(2)
 C3B 0.063(2) 0.083(3) 0.062(2) -0.022(2) 0.006(2) -0.030(2)
 C6B 0.059(2) 0.096(3) 0.055(2) -0.024(2) 0.0023(19) -0.026(2)
 C24B 0.080(3) 0.075(3) 0.050(2) -0.0114(19) 0.0074(19) -0.034(2)
 C28B 0.055(8) 0.060(7) 0.026(8) -0.013(6) 0.005(6) -0.017(6)
 N8B 0.064(7) 0.062(7) 0.059(9) -0.013(6) -0.001(6) -0.016(6)
 N4A 0.047(2) 0.198(6) 0.116(4) -0.095(4) 0.021(2) -0.042(3)
 C7A 0.050(2) 0.147(4) 0.054(2) -0.022(3) 0.0048(19) -0.016(3)
 C2B 0.084(3) 0.085(3) 0.054(2) -0.022(2) 0.008(2) -0.020(2)
 O1B 0.050(4) 0.111(9) 0.055(4) -0.034(5) 0.002(3) -0.029(5)
 C23A 0.051(2) 0.105(4) 0.077(3) -0.038(3) -0.004(2) -0.013(2)
 C22B 0.079(3) 0.116(4) 0.053(2) -0.022(2) 0.012(2) -0.051(3)
 C8A 0.049(2) 0.151(5) 0.058(3) -0.036(3) 0.0049(19) -0.022(3)
 C7B 0.071(3) 0.107(4) 0.050(2) -0.017(2) 0.0065(19) -0.043(3)
 C15C 0.062(10) 0.114(10) 0.086(9) -0.049(8) 0.024(7) -0.013(7)
 C23C 0.074(3) 0.113(4) 0.059(3) -0.012(3) -0.003(2) -0.046(3)
 C25A 0.062(3) 0.080(3) 0.079(3) -0.028(3) -0.015(2) -0.010(2)
 C14A 0.058(7) 0.071(10) 0.057(7) 0.001(5) -0.006(5) -0.019(6)
 C8B 0.065(3) 0.126(4) 0.055(2) -0.031(3) 0.008(2) -0.048(3)
 C2A 0.058(2) 0.123(4) 0.045(2) -0.009(2) 0.0026(18) -0.022(2)
 C14C 0.042(5) 0.100(9) 0.084(9) -0.049(7) 0.008(5) -0.015(5)
 C3A 0.054(2) 0.129(4) 0.041(2) -0.011(2) 0.0016(17) -0.022(2)
 C1A 0.056(2) 0.134(4) 0.046(2) 0.002(3) -0.0054(18) -0.026(3)
 N8A 0.081(5) 0.084(4) 0.083(6) -0.032(4) -0.018(4) -0.019(3)
 C22A 0.055(3) 0.134(5) 0.070(3) -0.039(3) 0.001(2) -0.021(3)
 C25C 0.089(3) 0.077(3) 0.062(3) -0.016(2) 0.006(2) -0.042(3)
 C19A 0.057(8) 0.135(9) 0.052(8) -0.023(7) -0.008(6) -0.036(7)
 C15A 0.057(6) 0.087(11) 0.052(6) -0.006(6) -0.002(5) -0.026(6)
 C9A 0.050(3) 0.176(6) 0.058(3) -0.039(3) 0.008(2) -0.029(3)
 C28A 0.045(6) 0.073(3) 0.106(4) -0.034(3) -0.015(3) -0.004(3)
 C6A 0.051(2) 0.140(4) 0.047(2) -0.032(3) 0.0041(17) -0.026(3)
 C4B 0.082(3) 0.092(3) 0.070(3) -0.012(3) 0.000(2) -0.022(3)
 C24A 0.059(3) 0.116(4) 0.081(3) -0.042(3) -0.005(2) -0.020(3)
 C9B 0.076(3) 0.153(5) 0.058(3) -0.044(3) 0.018(2) -0.065(4)
 C20A 0.056(8) 0.139(10) 0.040(6) -0.021(8) 0.005(6) -0.040(9)
 C24C 0.093(4) 0.133(5) 0.063(3) -0.011(3) -0.002(3) -0.062(4)
 C27B 0.066(7) 0.056(6) 0.028(7) -0.022(5) -0.001(5) -0.019(5)
 C5A 0.078(3) 0.129(4) 0.050(2) -0.012(3) 0.004(2) -0.030(3)
 C4A 0.064(3) 0.139(4) 0.047(2) -0.014(3) 0.0026(19) -0.023(3)
 C10B 0.046(6) 0.089(8) 0.054(7) -0.025(5) 0.004(5) -0.026(7)
 C18B 0.070(6) 0.106(15) 0.050(6) -0.003(8) -0.008(5) -0.036(8)
 C29B 0.051(7) 0.049(7) 0.059(10) -0.013(7) 0.002(6) -0.006(5)
 C1B 0.086(3) 0.096(4) 0.069(3) -0.028(3) 0.011(3) -0.019(3)
 C28C 0.139(5) 0.093(3) 0.058(3) -0.017(2) 0.018(3) -0.067(3)
 C21A 0.046(7) 0.130(10) 0.044(6) -0.015(7) -0.001(5) -0.028(7)
 C10C 0.051(6) 0.130(8) 0.057(7) -0.047(6) -0.012(4) 0.001(6)
 C29A 0.069(7) 0.096(6) 0.103(5) -0.043(4) 0.004(5) -0.040(5)
 C19B 0.055(5) 0.069(10) 0.061(6) -0.005(6) -0.004(4) -0.023(6)
 C22C 0.060(3) 0.140(5) 0.074(3) 0.013(3) -0.008(2) -0.036(3)
 N8C 0.215(7) 0.141(5) 0.063(3) -0.024(3) 0.026(4) -0.089(5)
 C5B 0.086(4) 0.089(4) 0.092(4) -0.021(3) -0.001(3) -0.010(3)
 C16C 0.062(5) 0.087(8) 0.048(5) -0.020(5) 0.003(4) -0.007(5)
 C30A 0.070(5) 0.091(5) 0.099(6) -0.036(4) -0.011(5) -0.037(4)
 C16A 0.038(6) 0.112(10) 0.051(6) -0.006(7) -0.002(4) -0.018(8)
 C18A 0.047(5) 0.111(9) 0.066(6) -0.022(6) -0.007(4) -0.031(6)
 C11B 0.060(7) 0.077(7) 0.052(5) -0.023(5) 0.004(4) -0.026(6)
 C13A 0.047(6) 0.131(16) 0.056(6) 0.012(6) -0.001(4) -0.018(7)
 C15B 0.056(6) 0.088(8) 0.055(6) -0.011(6) 0.003(5) -0.024(7)
 C14B 0.050(6) 0.079(8) 0.051(6) -0.016(5) -0.011(4) -0.014(6)
 C13B 0.052(6) 0.076(9) 0.047(5) -0.025(5) -0.003(4) -0.016(6)
 C29C 0.134(5) 0.159(6) 0.078(3) -0.051(4) 0.025(4) -0.089(5)
 C10A 0.045(5) 0.064(8) 0.061(5) 0.001(5) 0.002(4) -0.009(5)
 C17B 0.068(6) 0.093(12) 0.047(6) -0.002(7) 0.001(4) -0.028(7)
 C17A 0.049(6) 0.117(9) 0.063(7) -0.023(6) 0.005(5) -0.018(6)
 C12B 0.061(6) 0.080(7) 0.055(5) -0.025(6) 0.009(4) -0.027(6)
 C19C 0.054(5) 0.077(7) 0.072(6) -0.018(5) -0.001(4) -0.021(5)
 C30B 0.055(6) 0.061(8) 0.056(9) -0.017(6) -0.011(5) -0.012(6)
 O1C 0.069(4) 0.103(5) 0.056(4) -0.015(3) 0.005(3) 0.023(4)
 C18C 0.060(5) 0.080(6) 0.055(5) -0.020(4) -0.005(3) -0.018(4)
 C26B 0.064(7) 0.058(7) 0.049(7) -0.017(6) -0.006(5) -0.015(5)
 C30C 0.153(6) 0.150(6) 0.086(4) -0.052(4) 0.033(4) -0.090(5)
 C16B 0.057(5) 0.074(8) 0.060(6) -0.013(6) 0.004(4) -0.018(6)
 C27A 0.075(7) 0.089(5) 0.079(5) -0.029(3) -0.007(5) -0.023(4)
 C26A 0.117(11) 0.090(5) 0.089(7) -0.028(4) -0.016(7) -0.033(5)
 C27C 0.164(7) 0.157(7) 0.066(3) -0.021(4) 0.000(4) -0.063(6)
 C20B 0.056(5) 0.103(10) 0.064(6) -0.040(7) 0.007(4) -0.021(6)
 C17C 0.060(5) 0.072(5) 0.054(4) -0.014(4) -0.005(3) -0.008(4)
 C13C 0.055(5) 0.102(6) 0.048(4) -0.025(4) 0.001(3) -0.003(4)
 C21B 0.059(5) 0.105(10) 0.060(6) -0.034(7) 0.009(4) -0.029(6)
 C20C 0.060(5) 0.072(6) 0.087(7) -0.029(5) -0.010(4) -0.005(4)
 C11C 0.066(5) 0.105(7) 0.054(4) -0.018(4) 0.004(4) 0.000(5)
 C21C 0.069(5) 0.108(8) 0.068(5) -0.036(5) -0.013(4) -0.007(6)
 C12C 0.058(5) 0.105(6) 0.060(5) -0.018(4) 0.000(4) 0.005(4)
 C11A 0.051(4) 0.130(11) 0.046(4) -0.004(5) -0.002(3) -0.021(5)
 C12A 0.052(5) 0.153(13) 0.055(5) 0.003(6) -0.001(4) -0.029(6)
 C26C 0.209(8) 0.182(9) 0.059(3) -0.010(4) 0.006(5) -0.064(7)
 Cl2G 0.0762(8) 0.0960(9) 0.0833(8) -0.0328(7) -0.0100(6) -0.0246(6)
 Cl1G 0.1406(17) 0.1438(16) 0.0887(11) -0.0032(11) -0.0302(11) -0.0477(13)
 O7G 0.075(2) 0.119(3) 0.075(2) -0.027(2) -0.0064(17) -0.025(2)
 O8G 0.126(4) 0.103(3) 0.101(3) -0.006(2) -0.041(3) -0.037(3)
 O6G 0.097(3) 0.210(6) 0.099(3) -0.081(4) 0.014(2) -0.055(3)
 O5G 0.087(3) 0.106(3) 0.146(4) -0.034(3) -0.035(3) -0.030(2)
 O2G 0.164(6) 0.159(5) 0.110(4) 0.009(4) -0.018(4) -0.062(4)
 O1G 0.101(4) 0.178(5) 0.113(4) -0.005(4) -0.018(3) -0.036(3)
 O4G 0.225(8) 0.231(8) 0.119(4) 0.062(5) -0.081(5) -0.122(7)
 O3G 0.185(8) 0.204(8) 0.204(8) -0.085(7) 0.016(6) -0.019(6)
 C10F 0.046(5) 0.142(11) 0.034(5) -0.035(6) -0.004(4) -0.017(6)
 C11F 0.052(5) 0.101(8) 0.097(8) -0.010(6) 0.015(5) -0.007(5)
 C15F 0.047(8) 0.084(8) 0.086(11) -0.049(7) -0.002(6) -0.024(6)
 C12F 0.060(6) 0.101(8) 0.117(10) -0.002(6) 0.023(6) -0.011(5)
 C14F 0.057(6) 0.095(9) 0.075(9) -0.038(6) -0.005(6) -0.023(6)
 C13F 0.065(5) 0.072(6) 0.091(7) -0.025(5) 0.010(5) -0.020(4)
 O1F 0.086(5) 0.079(5) 0.095(6) -0.019(4) 0.034(4) -0.025(4)
 C16F 0.065(6) 0.065(6) 0.100(8) -0.014(5) 0.016(5) -0.007(5)
 C21F 0.052(4) 0.079(6) 0.062(5) -0.006(4) -0.005(4) -0.002(4)
 C20F 0.049(5) 0.079(7) 0.062(5) -0.009(4) -0.009(3) -0.006(4)
 C19F 0.042(4) 0.065(7) 0.057(6) 0.007(4) -0.003(4) -0.011(4)
 C18F 0.054(6) 0.082(7) 0.097(9) -0.022(6) 0.006(5) -0.020(5)
 C17F 0.053(7) 0.081(9) 0.120(14) -0.026(9) 0.022(7) -0.014(6)
 O1E 0.058(4) 0.117(8) 0.069(5) -0.045(5) 0.017(3) -0.032(5)
 C13E 0.058(6) 0.093(8) 0.059(6) -0.028(6) 0.007(4) -0.032(6)
 C14E 0.069(6) 0.088(7) 0.062(6) -0.026(5) 0.008(4) -0.019(6)
 C15E 0.067(6) 0.097(8) 0.065(7) -0.029(6) 0.013(5) -0.027(6)
 C10E 0.054(6) 0.098(8) 0.054(6) -0.026(6) 0.011(5) -0.026(7)
 C11E 0.062(6) 0.088(8) 0.060(5) -0.026(5) 0.000(4) -0.022(6)
 C12E 0.068(7) 0.092(9) 0.068(6) -0.033(7) 0.015(5) -0.037(7)
 C16E 0.064(5) 0.102(10) 0.056(5) -0.024(6) 0.014(4) -0.038(6)
 C17E 0.061(5) 0.093(10) 0.049(5) -0.016(6) 0.011(4) -0.032(6)
 C18E 0.059(5) 0.118(13) 0.049(5) -0.011(7) 0.009(5) -0.035(6)
 C19E 0.060(5) 0.077(9) 0.051(5) -0.009(5) 0.010(4) -0.031(5)
 C20E 0.072(5) 0.134(12) 0.059(5) -0.035(7) 0.013(4) -0.043(7)
 C21E 0.079(6) 0.139(13) 0.062(6) -0.043(7) 0.017(5) -0.051(7)
 C16D 0.053(6) 0.120(10) 0.064(7) -0.013(7) -0.006(5) -0.015(8)
 C21D 0.060(8) 0.131(9) 0.058(8) -0.029(6) 0.005(6) -0.030(7)
 C20D 0.058(8) 0.120(8) 0.064(10) -0.035(6) -0.005(6) -0.036(6)
 C19D 0.038(5) 0.126(8) 0.046(6) -0.028(6) -0.012(4) -0.021(6)
 C18D 0.054(6) 0.105(9) 0.077(7) -0.035(6) 0.006(5) -0.028(6)
 C17D 0.047(6) 0.129(11) 0.060(6) -0.020(7) 0.005(5) -0.016(8)
 O1D 0.048(4) 0.102(8) 0.063(5) 0.010(5) 0.005(3) -0.012(5)
 C13D 0.040(5) 0.117(13) 0.078(7) 0.010(6) 0.001(4) -0.006(5)
 C12D 0.052(5) 0.139(12) 0.074(6) -0.014(6) 0.014(4) -0.003(5)
 C11D 0.048(4) 0.143(12) 0.080(6) -0.034(7) 0.007(4) -0.013(5)
 C10D 0.052(5) 0.076(9) 0.065(6) -0.003(5) 0.004(4) -0.004(5)
 C15D 0.045(6) 0.085(9) 0.055(6) 0.000(6) 0.007(4) -0.010(5)
 C14D 0.046(6) 0.084(13) 0.074(7) 0.016(6) -0.005(5) -0.013(5)
 C28E 0.085(8) 0.072(6) 0.064(8) -0.030(6) -0.012(6) -0.004(5)
 N8E 0.094(7) 0.095(10) 0.078(8) -0.039(7) -0.026(6) 0.019(6)
 C27E 0.121(9) 0.074(6) 0.050(6) -0.024(4) -0.016(6) -0.013(6)
 C29E 0.074(6) 0.088(8) 0.100(13) -0.027(8) -0.024(6) -0.004(5)
 C30E 0.080(7) 0.101(9) 0.115(14) -0.037(10) -0.024(7) 0.007(5)
 C26E 0.127(10) 0.083(9) 0.066(7) -0.027(7) -0.014(10) 0.012(7)
 N8D 0.080(13) 0.064(9) 0.064(12) -0.023(7) 0.011(10) -0.024(8)
 C28D 0.045(6) 0.073(3) 0.106(4) -0.034(3) -0.015(3) -0.004(3)
 C29D 0.10(3) 0.087(13) 0.101(10) -0.050(11) -0.003(14) -0.029(15)
 C30D 0.071(14) 0.078(10) 0.092(13) -0.043(9) -0.010(13) -0.012(10)
 C27D 0.036(10) 0.071(8) 0.075(9) -0.016(6) 0.015(7) -0.022(7)
 C26D 0.067(12) 0.072(9) 0.076(10) -0.021(7) 0.029(9) -0.025(8)
 Cl4G 0.0987(19) 0.0952(16) 0.0712(15) -0.0204(12) 0.0151(13) -0.0503(14)
 O15G 0.148(7) 0.111(5) 0.103(5) -0.028(4) 0.013(4) -0.070(5)
 O14G 0.108(5) 0.077(4) 0.113(5) -0.002(3) 0.030(4) -0.032(3)
 O13G 0.092(4) 0.088(4) 0.095(4) -0.023(3) 0.017(3) -0.033(3)
 O16G 0.123(5) 0.145(7) 0.069(4) -0.016(4) 0.008(3) -0.071(5)
 Cl4H 0.097(4) 0.078(3) 0.083(4) -0.005(2) 0.005(3) -0.040(3)
 O15H 0.173(17) 0.074(8) 0.20(2) 0.034(9) 0.067(16) -0.046(9)
 O14H 0.137(12) 0.109(11) 0.059(7) 0.008(7) 0.000(8) -0.025(10)
 O13H 0.099(9) 0.068(7) 0.111(11) -0.017(7) 0.028(7) -0.023(6)
 O16H 0.128(12) 0.156(14) 0.081(8) -0.041(9) 0.025(8) -0.051(10)
 N1S2 0.107(4) 0.102(3) 0.071(3) -0.014(2) 0.001(3) -0.026(3)
 C1S2 0.124(5) 0.100(4) 0.065(3) -0.010(3) 0.009(3) -0.055(4)
 C2S2 0.334(17) 0.179(9) 0.068(4) -0.007(5) -0.016(6) -0.159(11)
 C1S1 0.086(4) 0.145(6) 0.087(4) -0.006(4) -0.001(3) -0.057(4)
 N1S1 0.075(4) 0.141(5) 0.169(7) 0.004(5) -0.005(4) -0.028(4)
 C2S1 0.124(6) 0.169(7) 0.148(7) -0.079(6) 0.056(6) -0.073(6)
 N1S4 0.084(5) 0.206(12) 0.076(5) -0.003(6) -0.016(4) -0.040(7)
 C1S4 0.084(6) 0.197(13) 0.099(8) -0.009(7) -0.007(6) -0.054(8)
 C2S4 0.175(17) 0.23(2) 0.171(16) -0.052(13) -0.033(13) -0.046(15)
 C1T4 0.076(9) 0.091(10) 0.069(7) 0.007(6) -0.013(6) -0.025(7)
 N1T4 0.062(7) 0.088(9) 0.081(7) 0.013(6) 0.001(6) -0.019(6)
 C2T4 0.079(10) 0.115(12) 0.071(8) -0.012(8) -0.013(7) -0.031(9)

_geom_special_details
;
 All esds (except the esd in the dihedral angle between two l.s. planes)
 are estimated using the full covariance matrix.  The cell esds are taken
 into account individually in the estimation of esds in distances, angles
 and torsion angles; correlations between esds in cell parameters are only
 used when they are defined by crystal symmetry.  An approximate (isotropic)
 treatment of cell esds is used for estimating esds involving l.s. planes.
;
loop_
  _geom_bond_atom_site_label_1
  _geom_bond_atom_site_label_2
  _geom_bond_distance
  _geom_bond_site_symmetry_2
  _geom_bond_publ_flag
 Mn2 N6B 2.214(4) . ?
 Mn2 N6A 2.192(4) . ?
 Mn2 N6C 2.237(4) . ?
 Mn2 N5A 2.312(4) . ?
 Mn2 N5B 2.308(5) . ?
 Mn2 N5C 2.289(4) . ?
 Mn1 N3B 2.178(4) . ?
 Mn1 N3A 2.239(5) . ?
 Mn1 N3C 2.247(5) . ?
 Mn1 N4B 2.296(5) . ?
 Mn1 N4C 2.276(5) . ?
 Mn1 N4A 2.297(6) . ?
 N7B C25B 1.372(6) . ?
 N7B C24B 1.378(6) . ?
 N7B C28B 1.403(12) . ?
 N7B C28E 1.431(11) . ?
 N2B C3B 1.431(6) . ?
 N2B C6B 1.362(6) . ?
 N2B C7B 1.373(6) . ?
 N2A C7A 1.367(6) . ?
 N2A C3A 1.419(7) . ?
 N2A C6A 1.377(7) . ?
 N6B C25B 1.297(6) . ?
 N6B C23B 1.385(6) . ?
 N6A C23A 1.388(6) . ?
 N6A C25A 1.316(7) . ?
 N3B C6B 1.312(6) . ?
 N3B C8B 1.393(7) . ?
 N6C C23C 1.392(7) . ?
 N6C C25C 1.332(6) . ?
 N7A C25A 1.368(6) . ?
 N7A C28A 1.449(9) . ?
 N7A C24A 1.370(7) . ?
 N7A C28D 1.401(15) . ?
 N5A C22A 1.272(7) . ?
 N5A C19A 1.411(12) . ?
 N5A C19D 1.461(12) . ?
 N3A C8A 1.379(8) . ?
 N3A C6A 1.306(6) . ?
 N3C C6C 1.284(7) . ?
 N3C C8C 1.383(7) . ?
 N5B C22B 1.250(7) . ?
 N5B C19B 1.468(11) . ?
 N5B C19E 1.450(10) . ?
 N1A C1A 1.322(7) . ?
 N1A C5A 1.329(7) . ?
 O1A C16A 1.354(12) . ?
 O1A C13A 1.400(11) . ?
 N7C C25C 1.367(7) . ?
 N7C C24C 1.371(8) . ?
 N7C C28C 1.429(7) . ?
 N4B C9B 1.259(8) . ?
 N4B C10B 1.466(11) . ?
 N4B C10E 1.473(10) . ?
 N4C C10C 1.416(12) . ?
 N4C C9C 1.265(7) . ?
 N4C C10F 1.488(12) . ?
 N1B C1B 1.334(8) . ?
 N1B C5B 1.321(8) . ?
 C25B H25B 0.9500 . ?
 C23B C24B 1.352(7) . ?
 C23B C22B 1.463(7) . ?
 N5C C22C 1.278(7) . ?
 N5C C19C 1.415(10) . ?
 N5C C19F 1.526(10) . ?
 C3B C2B 1.389(7) . ?
 C3B C4B 1.358(8) . ?
 C6B H6B 0.9500 . ?
 C24B H24B 0.9500 . ?
 C28B C27B 1.394(12) . ?
 C28B C29B 1.391(12) . ?
 N8B C30B 1.327(13) . ?
 N8B C26B 1.327(13) . ?
 N4A C9A 1.287(9) . ?
 N4A C10A 1.454(10) . ?
 N4A C10D 1.449(10) . ?
 N2C C6C 1.374(9) . ?
 N2C C7C 1.363(9) . ?
 N2C C3C 1.417(10) . ?
 N2C C3F 1.486(12) . ?
 C7A H7A 0.9500 . ?
 C7A C8A 1.351(8) . ?
 C2B H2B 0.9500 . ?
 C2B C1B 1.389(7) . ?
 O1B C13B 1.382(11) . ?
 O1B C16B 1.406(11) . ?
 C23A C22A 1.450(8) . ?
 C23A C24A 1.344(8) . ?
 C22B H22B 0.9500 . ?
 C8A C9A 1.461(7) . ?
 C7B H7B 0.9500 . ?
 C7B C8B 1.350(8) . ?
 C15C H15C 0.9500 . ?
 C15C C14C 1.381(12) . ?
 C15C C10C 1.388(12) . ?
 C23C C24C 1.356(7) . ?
 C23C C22C 1.426(8) . ?
 C25A H25A 0.9500 . ?
 C14A H14A 0.9500 . ?
 C14A C15A 1.361(12) . ?
 C14A C13A 1.388(12) . ?
 C8B C9B 1.469(7) . ?
 C2A H2A 0.9500 . ?
 C2A C3A 1.384(6) . ?
 C2A C1A 1.397(7) . ?
 C14C H14C 0.9500 . ?
 C14C C13C 1.390(11) . ?
 C3A C4A 1.383(7) . ?
 C1A H1A 0.9500 . ?
 N8A C30A 1.344(9) . ?
 N8A C26A 1.330(11) . ?
 C22A H22A 0.9500 . ?
 C25C H25C 0.9500 . ?
 C19A C20A 1.383(12) . ?
 C19A C18A 1.390(12) . ?
 C15A H15A 0.9500 . ?
 C15A C10A 1.392(12) . ?
 C28A C29A 1.374(10) . ?
 C28A C27A 1.418(9) . ?
 C6A H6A 0.9500 . ?
 C4B H4B 0.9500 . ?
 C4B C5B 1.393(8) . ?
 C24A H24A 0.9500 . ?
 C9B H9B 0.9500 . ?
 C20A H20A 0.9500 . ?
 C20A C21A 1.397(12) . ?
 C24C H24C 0.9500 . ?
 C27B H27B 0.9500 . ?
 C27B C26B 1.391(13) . ?
 C5A H5A 0.9500 . ?
 C5A C4A 1.388(7) . ?
 C4A H4A 0.9500 . ?
 C10B C11B 1.385(12) . ?
 C10B C15B 1.399(12) . ?
 C6C H6C 0.9500 . ?
 C8C C9C 1.429(9) . ?
 C8C C7C 1.374(10) . ?
 C18B H18B 0.9500 . ?
 C18B C19B 1.385(12) . ?
 C18B C17B 1.377(12) . ?
 C29B H29B 0.9500 . ?
 C29B C30B 1.395(12) . ?
 C1B H1B 0.9500 . ?
 C28C C29C 1.393(9) . ?
 C28C C27C 1.397(9) . ?
 C21A H21A 0.9500 . ?
 C21A C16A 1.387(12) . ?
 C10C C11C 1.371(11) . ?
 C29A H29A 0.9500 . ?
 C29A C30A 1.376(9) . ?
 C19B C20B 1.364(11) . ?
 C22C H22C 0.9500 . ?
 C9C H9C 0.9500 . ?
 N8C C30C 1.327(9) . ?
 N8C C26C 1.336(11) . ?
 C5B H5B 0.9500 . ?
 C16C O1C 1.409(11) . ?
 C16C C17C 1.379(11) . ?
 C16C C21C 1.392(11) . ?
 C30A H30A 0.9500 . ?
 C16A C17A 1.389(12) . ?
 C18A H18A 0.9500 . ?
 C18A C17A 1.395(12) . ?
 C11B H11B 0.9500 . ?
 C11B C12B 1.403(11) . ?
 C13A C12A 1.381(12) . ?
 C15B H15B 0.9500 . ?
 C15B C14B 1.389(11) . ?
 C14B H14B 0.9500 . ?
 C14B C13B 1.414(12) . ?
 C13B C12B 1.395(12) . ?
 C29C H29C 0.9500 . ?
 C29C C30C 1.391(8) . ?
 C10A C11A 1.379(10) . ?
 C17B H17B 0.9500 . ?
 C17B C16B 1.365(11) . ?
 C17A H17A 0.9500 . ?
 C12B H12B 0.9500 . ?
 C19C C18C 1.380(10) . ?
 C19C C20C 1.394(10) . ?
 C30B H30B 0.9500 . ?
 O1C C13C 1.389(11) . ?
 C18C H18C 0.9500 . ?
 C18C C17C 1.391(10) . ?
 C26B H26B 0.9500 . ?
 C30C H30C 0.9500 . ?
 C16B C21B 1.367(10) . ?
 C27A H27A 0.9500 . ?
 C27A C26A 1.354(10) . ?
 C26A H26A 0.9500 . ?
 C7C H7C 0.9500 . ?
 C27C H27C 0.9500 . ?
 C27C C26C 1.402(9) . ?
 C20B H20B 0.9500 . ?
 C20B C21B 1.380(10) . ?
 C17C H17C 0.9500 . ?
 C13C C12C 1.379(10) . ?
 C21B H21B 0.9500 . ?
 C20C H20C 0.9500 . ?
 C20C C21C 1.389(10) . ?
 C11C H11C 0.9500 . ?
 C11C C12C 1.374(10) . ?
 C21C H21C 0.9500 . ?
 C12C H12C 0.9500 . ?
 C11A H11A 0.9500 . ?
 C11A C12A 1.392(10) . ?
 C12A H12A 0.9500 . ?
 C26C H26C 0.9500 . ?
 Cl2G O7G 1.427(4) . ?
 Cl2G O8G 1.434(5) . ?
 Cl2G O6G 1.442(5) . ?
 Cl2G O5G 1.456(4) . ?
 Cl1G O2G 1.426(7) . ?
 Cl1G O1G 1.415(6) . ?
 Cl1G O4G 1.402(6) . ?
 Cl1G O3G 1.451(8) . ?
 C10F C11F 1.386(11) . ?
 C10F C15F 1.398(12) . ?
 C11F H11F 0.9500 . ?
 C11F C12F 1.372(11) . ?
 C15F H15F 0.9500 . ?
 C15F C14F 1.394(12) . ?
 C12F H12F 0.9500 . ?
 C12F C13F 1.385(11) . ?
 C14F H14F 0.9500 . ?
 C14F C13F 1.382(12) . ?
 C13F O1F 1.393(11) . ?
 O1F C16F 1.423(12) . ?
 C16F C21F 1.397(11) . ?
 C16F C17F 1.400(12) . ?
 C21F H21F 0.9500 . ?
 C21F C20F 1.402(10) . ?
 C20F H20F 0.9500 . ?
 C20F C19F 1.385(11) . ?
 C19F C18F 1.387(11) . ?
 C18F H18F 0.9500 . ?
 C18F C17F 1.391(12) . ?
 C17F H17F 0.9500 . ?
 O1E C13E 1.378(10) . ?
 O1E C16E 1.408(10) . ?
 C13E C14E 1.403(11) . ?
 C13E C12E 1.391(11) . ?
 C14E H14E 0.9500 . ?
 C14E C15E 1.402(10) . ?
 C15E H15E 0.9500 . ?
 C15E C10E 1.394(11) . ?
 C10E C11E 1.392(11) . ?
 C11E H11E 0.9500 . ?
 C11E C12E 1.391(11) . ?
 C12E H12E 0.9500 . ?
 C16E C17E 1.355(10) . ?
 C16E C21E 1.363(10) . ?
 C17E H17E 0.9500 . ?
 C17E C18E 1.373(10) . ?
 C18E H18E 0.9500 . ?
 C18E C19E 1.381(10) . ?
 C19E C20E 1.363(10) . ?
 C20E H20E 0.9500 . ?
 C20E C21E 1.375(10) . ?
 C21E H21E 0.9500 . ?
 C16D C21D 1.391(11) . ?
 C16D C17D 1.390(12) . ?
 C16D O1D 1.378(13) . ?
 C21D H21D 0.9500 . ?
 C21D C20D 1.419(12) . ?
 C20D H20D 0.9500 . ?
 C20D C19D 1.397(12) . ?
 C19D C18D 1.404(11) . ?
 C18D H18D 0.9500 . ?
 C18D C17D 1.407(12) . ?
 C17D H17D 0.9500 . ?
 O1D C13D 1.401(11) . ?
 C13D C12D 1.382(12) . ?
 C13D C14D 1.384(12) . ?
 C12D H12D 0.9500 . ?
 C12D C11D 1.372(10) . ?
 C11D H11D 0.9500 . ?
 C11D C10D 1.380(11) . ?
 C10D C15D 1.369(12) . ?
 C15D H15D 0.9500 . ?
 C15D C14D 1.380(11) . ?
 C14D H14D 0.9500 . ?
 O1ET C2ET 1.379(10) . ?
 O1ET C3ET 1.469(11) . ?
 C1ET C2ET 1.426(12) . ?
 C3ET C4ET 1.439(15) . ?
 C3C C4C 1.390(11) . ?
 C3C C2C 1.398(11) . ?
 C4C H4C 0.9500 . ?
 C4C C5C 1.377(12) . ?
 C2C H2C 0.9500 . ?
 C2C C1C 1.385(12) . ?
 C1C H1C 0.9500 . ?
 C1C N1C 1.320(12) . ?
 C5C H5C 0.9500 . ?
 C5C N1C 1.322(12) . ?
 C3F C4F 1.388(12) . ?
 C3F C2F 1.390(12) . ?
 C4F H4F 0.9500 . ?
 C4F C5F 1.395(13) . ?
 C2F H2F 0.9500 . ?
 C2F C1F 1.392(13) . ?
 C1F H1F 0.9500 . ?
 C1F N1F 1.299(13) . ?
 C5F H5F 0.9500 . ?
 C5F N1F 1.294(12) . ?
 C28E C27E 1.404(11) . ?
 C28E C29E 1.400(11) . ?
 N8E C30E 1.321(12) . ?
 N8E C26E 1.314(13) . ?
 C27E H27E 0.9500 . ?
 C27E C26E 1.403(12) . ?
 C29E H29E 0.9500 . ?
 C29E C30E 1.403(11) . ?
 C30E H30E 0.9500 . ?
 C26E H26E 0.9500 . ?
 N8D C30D 1.318(16) . ?
 N8D C26D 1.331(15) . ?
 C28D C29D 1.376(14) . ?
 C28D C27D 1.388(14) . ?
 C29D H29D 0.9500 . ?
 C29D C30D 1.369(15) . ?
 C30D H30D 0.9500 . ?
 C27D H27D 0.9500 . ?
 C27D C26D 1.358(14) . ?
 C26D H26D 0.9500 . ?
 Cl4G O15G 1.4438 . ?
 Cl4G O14G 1.4425 . ?
 Cl4G O13G 1.4417 . ?
 Cl4G O16G 1.4422 . ?
 Cl3G O10G 1.4421 . ?
 Cl3G O11G 1.4412 . ?
 Cl3G O9G 1.4428 . ?
 Cl3G O12G 1.4428 . ?
 Cl3H O10H 1.4413 . ?
 Cl3H O11H 1.4417 . ?
 Cl3H O9H 1.4418 . ?
 Cl3H O12H 1.4419 . ?
 Cl4H O15H 1.4414 . ?
 Cl4H O14H 1.4421 . ?
 Cl4H O13H 1.4427 . ?
 Cl4H O16H 1.4433 . ?
 N1S2 C1S2 1.102(7) . ?
 C1S2 C2S2 1.487(10) . ?
 C2S2 H2SA 0.9800 . ?
 C2S2 H2SB 0.9800 . ?
 C2S2 H2SC 0.9800 . ?
 C1EV C2EV 1.5207 . ?
 C2EV O1EV 1.4209 . ?
 O1EV C3EV 1.4197 . ?
 C3EV C4EV 1.5204 . ?
 C1S1 N1S1 1.110(10) . ?
 C1S1 C2S1 1.457(12) . ?
 C2S1 H2SD 0.9800 . ?
 C2S1 H2SE 0.9800 . ?
 C2S1 H2SF 0.9800 . ?
 N1S4 C1S4 1.170(12) . ?
 C1S4 C2S4 1.465(13) . ?
 C2S4 H2SG 0.9800 . ?
 C2S4 H2SH 0.9800 . ?
 C2S4 H2SI 0.9800 . ?
 C1S5 N1S5 1.146(16) . ?
 C1S5 C2S5 1.427(18) . ?
 C2S5 H2SJ 0.9800 . ?
 C2S5 H2SK 0.9800 . ?
 C2S5 H2SL 0.9800 . ?
 C1T4 N1T4 1.179(13) . ?
 C1T4 C2T4 1.459(13) . ?
 C2T4 H2TA 0.9800 . ?
 C2T4 H2TB 0.9800 . ?
 C2T4 H2TC 0.9800 . ?
 N1S3 C1S3 1.1625 . ?
 C1S3 C2S3 1.4535 . ?
 N1T3 C1T3 1.1625 . ?
 C1T3 C2T3 1.4535 . ?

loop_
  _geom_angle_atom_site_label_1
  _geom_angle_atom_site_label_2
  _geom_angle_atom_site_label_3
  _geom_angle
  _geom_angle_site_symmetry_1
  _geom_angle_site_symmetry_3
  _geom_angle_publ_flag
 N6B Mn2 N6C 90.98(16) . . ?
 N6B Mn2 N5A 93.24(15) . . ?
 N6B Mn2 N5B 74.88(15) . . ?
 N6B Mn2 N5C 157.30(18) . . ?
 N6A Mn2 N6B 106.55(14) . . ?
 N6A Mn2 N6C 95.84(15) . . ?
 N6A Mn2 N5A 73.86(16) . . ?
 N6A Mn2 N5B 168.96(15) . . ?
 N6A Mn2 N5C 92.32(18) . . ?
 N6C Mn2 N5A 169.61(16) . . ?
 N6C Mn2 N5B 95.08(14) . . ?
 N6C Mn2 N5C 74.30(16) . . ?
 N5B Mn2 N5A 95.18(16) . . ?
 N5C Mn2 N5A 104.27(16) . . ?
 N5C Mn2 N5B 89.04(19) . . ?
 N3B Mn1 N3A 96.22(16) . . ?
 N3B Mn1 N3C 94.80(15) . . ?
 N3B Mn1 N4B 75.26(17) . . ?
 N3B Mn1 N4C 98.13(16) . . ?
 N3B Mn1 N4A 170.28(18) . . ?
 N3A Mn1 N3C 98.99(17) . . ?
 N3A Mn1 N4B 96.73(17) . . ?
 N3A Mn1 N4C 165.01(17) . . ?
 N3A Mn1 N4A 74.17(19) . . ?
 N3C Mn1 N4B 162.24(19) . . ?
 N3C Mn1 N4C 75.55(16) . . ?
 N3C Mn1 N4A 88.26(18) . . ?
 N4B Mn1 N4A 104.0(2) . . ?
 N4C Mn1 N4B 91.09(16) . . ?
 N4C Mn1 N4A 91.56(18) . . ?
 C25B N7B C24B 106.7(4) . . ?
 C25B N7B C28B 131.2(8) . . ?
 C25B N7B C28E 122.0(9) . . ?
 C24B N7B C28B 122.1(8) . . ?
 C24B N7B C28E 131.0(9) . . ?
 C6B N2B C3B 126.0(4) . . ?
 C6B N2B C7B 107.3(4) . . ?
 C7B N2B C3B 126.5(4) . . ?
 C7A N2A C3A 128.3(5) . . ?
 C7A N2A C6A 106.0(5) . . ?
 C6A N2A C3A 125.7(4) . . ?
 C25B N6B Mn2 140.6(3) . . ?
 C25B N6B C23B 106.3(4) . . ?
 C23B N6B Mn2 113.0(3) . . ?
 C23A N6A Mn2 115.4(4) . . ?
 C25A N6A Mn2 138.8(3) . . ?
 C25A N6A C23A 104.9(4) . . ?
 C6B N3B Mn1 141.8(4) . . ?
 C6B N3B C8B 104.0(4) . . ?
 C8B N3B Mn1 113.9(3) . . ?
 C23C N6C Mn2 112.5(3) . . ?
 C25C N6C Mn2 141.4(4) . . ?
 C25C N6C C23C 105.9(4) . . ?
 C25A N7A C28A 123.8(6) . . ?
 C25A N7A C24A 106.9(5) . . ?
 C25A N7A C28D 130.1(10) . . ?
 C24A N7A C28A 129.3(5) . . ?
 C24A N7A C28D 120.9(10) . . ?
 C22A N5A Mn2 114.1(4) . . ?
 C22A N5A C19A 110.6(10) . . ?
 C22A N5A C19D 124.9(10) . . ?
 C19A N5A Mn2 135.1(10) . . ?
 C19D N5A Mn2 120.9(10) . . ?
 C8A N3A Mn1 112.9(3) . . ?
 C6A N3A Mn1 140.7(4) . . ?
 C6A N3A C8A 106.4(5) . . ?
 C6C N3C Mn1 141.1(4) . . ?
 C6C N3C C8C 109.1(5) . . ?
 C8C N3C Mn1 108.8(4) . . ?
 C22B N5B Mn2 113.3(3) . . ?
 C22B N5B C19B 128.9(8) . . ?
 C22B N5B C19E 109.2(7) . . ?
 C19B N5B Mn2 116.6(7) . . ?
 C19E N5B Mn2 137.4(7) . . ?
 C1A N1A C5A 115.8(5) . . ?
 C16A O1A C13A 117.4(12) . . ?
 C25C N7C C24C 107.7(4) . . ?
 C25C N7C C28C 126.5(6) . . ?
 C24C N7C C28C 125.7(5) . . ?
 C9B N4B Mn1 113.5(3) . . ?
 C9B N4B C10B 108.0(8) . . ?
 C9B N4B C10E 128.4(8) . . ?
 C10B N4B Mn1 136.6(7) . . ?
 C10E N4B Mn1 118.1(7) . . ?
 C10C N4C Mn1 119.0(7) . . ?
 C9C N4C Mn1 114.6(4) . . ?
 C9C N4C C10C 126.2(8) . . ?
 C9C N4C C10F 109.6(7) . . ?
 C10F N4C Mn1 135.8(6) . . ?
 C5B N1B C1B 116.8(5) . . ?
 N7B C25B H25B 124.4 . . ?
 N6B C25B N7B 111.2(4) . . ?
 N6B C25B H25B 124.4 . . ?
 N6B C23B C22B 117.9(5) . . ?
 C24B C23B N6B 109.8(4) . . ?
 C24B C23B C22B 132.3(5) . . ?
 C22C N5C Mn2 113.9(4) . . ?
 C22C N5C C19C 116.8(6) . . ?
 C22C N5C C19F 123.1(6) . . ?
 C19C N5C Mn2 124.2(5) . . ?
 C19F N5C Mn2 122.8(4) . . ?
 C2B C3B N2B 120.2(4) . . ?
 C4B C3B N2B 120.3(4) . . ?
 C4B C3B C2B 119.5(5) . . ?
 N2B C6B H6B 124.0 . . ?
 N3B C6B N2B 112.1(4) . . ?
 N3B C6B H6B 124.0 . . ?
 N7B C24B H24B 127.0 . . ?
 C23B C24B N7B 106.1(4) . . ?
 C23B C24B H24B 127.0 . . ?
 C27B C28B N7B 119.3(12) . . ?
 C29B C28B N7B 118.9(12) . . ?
 C29B C28B C27B 121.1(11) . . ?
 C30B N8B C26B 118.3(12) . . ?
 C9A N4A Mn1 115.2(4) . . ?
 C9A N4A C10A 126.8(7) . . ?
 C9A N4A C10D 105.9(7) . . ?
 C10A N4A Mn1 118.0(6) . . ?
 C10D N4A Mn1 137.4(7) . . ?
 C6C N2C C3C 117.1(6) . . ?
 C6C N2C C3F 137.6(7) . . ?
 C7C N2C C6C 106.6(6) . . ?
 C7C N2C C3C 133.2(7) . . ?
 C7C N2C C3F 114.6(7) . . ?
 N2A C7A H7A 126.3 . . ?
 C8A C7A N2A 107.4(6) . . ?
 C8A C7A H7A 126.3 . . ?
 C3B C2B H2B 121.2 . . ?
 C1B C2B C3B 117.7(5) . . ?
 C1B C2B H2B 121.2 . . ?
 C13B O1B C16B 118.8(7) . . ?
 N6A C23A C22A 116.7(5) . . ?
 C24A C23A N6A 110.7(5) . . ?
 C24A C23A C22A 132.6(5) . . ?
 N5B C22B C23B 120.4(5) . . ?
 N5B C22B H22B 119.8 . . ?
 C23B C22B H22B 119.8 . . ?
 N3A C8A C9A 119.3(6) . . ?
 C7A C8A N3A 109.2(4) . . ?
 C7A C8A C9A 131.3(6) . . ?
 N2B C7B H7B 127.4 . . ?
 C8B C7B N2B 105.2(5) . . ?
 C8B C7B H7B 127.4 . . ?
 C14C C15C H15C 121.1 . . ?
 C14C C15C C10C 117.9(13) . . ?
 C10C C15C H15C 121.1 . . ?
 N6C C23C C22C 118.3(4) . . ?
 C24C C23C N6C 109.6(5) . . ?
 C24C C23C C22C 132.1(6) . . ?
 N6A C25A N7A 111.3(5) . . ?
 N6A C25A H25A 124.3 . . ?
 N7A C25A H25A 124.3 . . ?
 C15A C14A H14A 120.3 . . ?
 C15A C14A C13A 119.4(14) . . ?
 C13A C14A H14A 120.3 . . ?
 N3B C8B C9B 117.2(5) . . ?
 C7B C8B N3B 111.5(4) . . ?
 C7B C8B C9B 131.4(5) . . ?
 C3A C2A H2A 121.4 . . ?
 C3A C2A C1A 117.3(6) . . ?
 C1A C2A H2A 121.4 . . ?
 C15C C14C H14C 121.9 . . ?
 C15C C14C C13C 116.1(12) . . ?
 C13C C14C H14C 121.9 . . ?
 C2A C3A N2A 120.8(5) . . ?
 C4A C3A N2A 120.6(4) . . ?
 C4A C3A C2A 118.6(5) . . ?
 N1A C1A C2A 125.4(5) . . ?
 N1A C1A H1A 117.3 . . ?
 C2A C1A H1A 117.3 . . ?
 C26A N8A C30A 116.0(8) . . ?
 N5A C22A C23A 119.7(5) . . ?
 N5A C22A H22A 120.2 . . ?
 C23A C22A H22A 120.2 . . ?
 N6C C25C N7C 110.2(5) . . ?
 N6C C25C H25C 124.9 . . ?
 N7C C25C H25C 124.9 . . ?
 C20A C19A N5A 114.4(12) . . ?
 C20A C19A C18A 124.3(11) . . ?
 C18A C19A N5A 120.0(13) . . ?
 C14A C15A H15A 119.3 . . ?
 C14A C15A C10A 121.3(14) . . ?
 C10A C15A H15A 119.3 . . ?
 N4A C9A C8A 117.7(6) . . ?
 C29A C28A N7A 122.9(7) . . ?
 C29A C28A C27A 115.9(7) . . ?
 C27A C28A N7A 121.2(7) . . ?
 N2A C6A H6A 124.5 . . ?
 N3A C6A N2A 111.1(5) . . ?
 N3A C6A H6A 124.5 . . ?
 C3B C4B H4B 120.9 . . ?
 C3B C4B C5B 118.2(5) . . ?
 C5B C4B H4B 120.9 . . ?
 N7A C24A H24A 126.9 . . ?
 C23A C24A N7A 106.2(5) . . ?
 C23A C24A H24A 126.9 . . ?
 N4B C9B C8B 119.8(6) . . ?
 N4B C9B H9B 120.1 . . ?
 C8B C9B H9B 120.1 . . ?
 C19A C20A H20A 120.1 . . ?
 C19A C20A C21A 119.9(12) . . ?
 C21A C20A H20A 120.1 . . ?
 N7C C24C H24C 126.7 . . ?
 C23C C24C N7C 106.6(5) . . ?
 C23C C24C H24C 126.7 . . ?
 C28B C27B H27B 122.6 . . ?
 C26B C27B C28B 114.7(12) . . ?
 C26B C27B H27B 122.6 . . ?
 N1A C5A H5A 117.9 . . ?
 N1A C5A C4A 124.2(6) . . ?
 C4A C5A H5A 117.9 . . ?
 C3A C4A C5A 118.7(5) . . ?
 C3A C4A H4A 120.7 . . ?
 C5A C4A H4A 120.7 . . ?
 C11B C10B N4B 130.7(10) . . ?
 C11B C10B C15B 121.9(10) . . ?
 C15B C10B N4B 107.2(10) . . ?
 N3C C6C N2C 110.1(6) . . ?
 N3C C6C H6C 124.9 . . ?
 N2C C6C H6C 124.9 . . ?
 N3C C8C C9C 122.7(6) . . ?
 C7C C8C N3C 106.5(6) . . ?
 C7C C8C C9C 130.7(6) . . ?
 C19B C18B H18B 119.5 . . ?
 C17B C18B H18B 119.5 . . ?
 C17B C18B C19B 121.1(13) . . ?
 C28B C29B H29B 120.9 . . ?
 C28B C29B C30B 118.1(13) . . ?
 C30B C29B H29B 120.9 . . ?
 N1B C1B C2B 123.7(5) . . ?
 N1B C1B H1B 118.1 . . ?
 C2B C1B H1B 118.1 . . ?
 C29C C28C N7C 120.2(5) . . ?
 C29C C28C C27C 120.2(6) . . ?
 C27C C28C N7C 119.7(6) . . ?
 C20A C21A H21A 121.7 . . ?
 C16A C21A C20A 116.6(12) . . ?
 C16A C21A H21A 121.7 . . ?
 C15C C10C N4C 116.5(10) . . ?
 C11C C10C N4C 117.3(10) . . ?
 C11C C10C C15C 126.0(11) . . ?
 C28A C29A H29A 120.3 . . ?
 C28A C29A C30A 119.3(9) . . ?
 C30A C29A H29A 120.3 . . ?
 C18B C19B N5B 118.1(10) . . ?
 C20B C19B N5B 124.1(11) . . ?
 C20B C19B C18B 117.7(10) . . ?
 N5C C22C C23C 120.2(5) . . ?
 N5C C22C H22C 119.9 . . ?
 C23C C22C H22C 119.9 . . ?
 N4C C9C C8C 118.0(6) . . ?
 N4C C9C H9C 121.0 . . ?
 C8C C9C H9C 121.0 . . ?
 C30C N8C C26C 117.3(7) . . ?
 N1B C5B C4B 124.1(6) . . ?
 N1B C5B H5B 118.0 . . ?
 C4B C5B H5B 118.0 . . ?
 C17C C16C O1C 119.6(9) . . ?
 C17C C16C C21C 123.4(9) . . ?
 C21C C16C O1C 117.0(9) . . ?
 N8A C30A C29A 124.6(9) . . ?
 N8A C30A H30A 117.7 . . ?
 C29A C30A H30A 117.7 . . ?
 O1A C16A C21A 117.4(13) . . ?
 O1A C16A C17A 119.6(11) . . ?
 C21A C16A C17A 122.8(10) . . ?
 C19A C18A H18A 122.4 . . ?
 C19A C18A C17A 115.2(12) . . ?
 C17A C18A H18A 122.4 . . ?
 C10B C11B H11B 120.5 . . ?
 C10B C11B C12B 119.1(10) . . ?
 C12B C11B H11B 120.5 . . ?
 C14A C13A O1A 114.5(10) . . ?
 C12A C13A O1A 124.6(11) . . ?
 C12A C13A C14A 120.8(11) . . ?
 C10B C15B H15B 120.1 . . ?
 C14B C15B C10B 119.7(11) . . ?
 C14B C15B H15B 120.1 . . ?
 C15B C14B H14B 120.7 . . ?
 C15B C14B C13B 118.6(10) . . ?
 C13B C14B H14B 120.7 . . ?
 O1B C13B C14B 118.1(11) . . ?
 O1B C13B C12B 120.5(10) . . ?
 C12B C13B C14B 121.4(9) . . ?
 C28C C29C H29C 121.1 . . ?
 C30C C29C C28C 117.8(7) . . ?
 C30C C29C H29C 121.1 . . ?
 C15A C10A N4A 111.5(9) . . ?
 C11A C10A N4A 129.3(9) . . ?
 C11A C10A C15A 118.7(10) . . ?
 C18B C17B H17B 120.1 . . ?
 C16B C17B C18B 119.7(13) . . ?
 C16B C17B H17B 120.1 . . ?
 C16A C17A C18A 121.1(11) . . ?
 C16A C17A H17A 119.4 . . ?
 C18A C17A H17A 119.4 . . ?
 C11B C12B H12B 120.3 . . ?
 C13B C12B C11B 119.3(10) . . ?
 C13B C12B H12B 120.3 . . ?
 C18C C19C N5C 125.5(8) . . ?
 C18C C19C C20C 124.0(8) . . ?
 C20C C19C N5C 109.3(7) . . ?
 N8B C30B C29B 122.0(12) . . ?
 N8B C30B H30B 119.0 . . ?
 C29B C30B H30B 119.0 . . ?
 C13C O1C C16C 116.6(8) . . ?
 C19C C18C H18C 121.5 . . ?
 C19C C18C C17C 117.1(9) . . ?
 C17C C18C H18C 121.5 . . ?
 N8B C26B C27B 125.7(14) . . ?
 N8B C26B H26B 117.1 . . ?
 C27B C26B H26B 117.1 . . ?
 N8C C30C C29C 123.8(8) . . ?
 N8C C30C H30C 118.1 . . ?
 C29C C30C H30C 118.1 . . ?
 C17B C16B O1B 122.9(10) . . ?
 C17B C16B C21B 120.1(10) . . ?
 C21B C16B O1B 117.1(9) . . ?
 C28A C27A H27A 119.7 . . ?
 C26A C27A C28A 120.6(8) . . ?
 C26A C27A H27A 119.7 . . ?
 N8A C26A C27A 123.6(8) . . ?
 N8A C26A H26A 118.2 . . ?
 C27A C26A H26A 118.2 . . ?
 N2C C7C C8C 107.6(7) . . ?
 N2C C7C H7C 126.2 . . ?
 C8C C7C H7C 126.2 . . ?
 C28C C27C H27C 121.9 . . ?
 C28C C27C C26C 116.1(8) . . ?
 C26C C27C H27C 121.9 . . ?
 C19B C20B H20B 119.3 . . ?
 C19B C20B C21B 121.4(10) . . ?
 C21B C20B H20B 119.3 . . ?
 C16C C17C C18C 119.5(9) . . ?
 C16C C17C H17C 120.3 . . ?
 C18C C17C H17C 120.3 . . ?
 O1C C13C C14C 109.7(9) . . ?
 C12C C13C C14C 124.8(9) . . ?
 C12C C13C O1C 125.5(7) . . ?
 C16B C21B C20B 119.6(9) . . ?
 C16B C21B H21B 120.2 . . ?
 C20B C21B H21B 120.2 . . ?
 C19C C20C H20C 120.8 . . ?
 C21C C20C C19C 118.5(8) . . ?
 C21C C20C H20C 120.8 . . ?
 C10C C11C H11C 122.1 . . ?
 C10C C11C C12C 115.9(9) . . ?
 C12C C11C H11C 122.1 . . ?
 C16C C21C H21C 121.2 . . ?
 C20C C21C C16C 117.6(8) . . ?
 C20C C21C H21C 121.2 . . ?
 C13C C12C H12C 120.4 . . ?
 C11C C12C C13C 119.2(8) . . ?
 C11C C12C H12C 120.4 . . ?
 C10A C11A H11A 119.5 . . ?
 C10A C11A C12A 121.0(8) . . ?
 C12A C11A H11A 119.5 . . ?
 C13A C12A C11A 118.7(9) . . ?
 C13A C12A H12A 120.6 . . ?
 C11A C12A H12A 120.6 . . ?
 N8C C26C C27C 124.7(9) . . ?
 N8C C26C H26C 117.7 . . ?
 C27C C26C H26C 117.7 . . ?
 O7G Cl2G O8G 110.8(3) . . ?
 O7G Cl2G O6G 108.8(3) . . ?
 O7G Cl2G O5G 109.9(3) . . ?
 O8G Cl2G O6G 106.5(4) . . ?
 O8G Cl2G O5G 111.0(3) . . ?
 O6G Cl2G O5G 109.6(3) . . ?
 O2G Cl1G O3G 106.4(5) . . ?
 O1G Cl1G O2G 109.7(4) . . ?
 O1G Cl1G O3G 109.8(5) . . ?
 O4G Cl1G O2G 111.2(4) . . ?
 O4G Cl1G O1G 109.7(4) . . ?
 O4G Cl1G O3G 110.1(6) . . ?
 C11F C10F N4C 127.0(11) . . ?
 C11F C10F C15F 112.8(10) . . ?
 C15F C10F N4C 120.1(10) . . ?
 C10F C11F H11F 117.0 . . ?
 C12F C11F C10F 126.1(10) . . ?
 C12F C11F H11F 117.0 . . ?
 C10F C15F H15F 118.6 . . ?
 C14F C15F C10F 122.8(12) . . ?
 C14F C15F H15F 118.6 . . ?
 C11F C12F H12F 120.1 . . ?
 C11F C12F C13F 119.8(9) . . ?
 C13F C12F H12F 120.1 . . ?
 C15F C14F H14F 119.2 . . ?
 C13F C14F C15F 121.6(13) . . ?
 C13F C14F H14F 119.2 . . ?
 C12F C13F O1F 122.1(8) . . ?
 C14F C13F C12F 116.8(10) . . ?
 C14F C13F O1F 120.8(10) . . ?
 C13F O1F C16F 114.0(8) . . ?
 C21F C16F O1F 116.1(10) . . ?
 C21F C16F C17F 120.6(10) . . ?
 C17F C16F O1F 123.2(10) . . ?
 C16F C21F H21F 121.5 . . ?
 C16F C21F C20F 117.0(10) . . ?
 C20F C21F H21F 121.5 . . ?
 C21F C20F H20F 118.0 . . ?
 C19F C20F C21F 123.9(9) . . ?
 C19F C20F H20F 118.0 . . ?
 C20F C19F N5C 126.3(7) . . ?
 C20F C19F C18F 116.9(9) . . ?
 C18F C19F N5C 116.5(9) . . ?
 C19F C18F H18F 119.1 . . ?
 C19F C18F C17F 121.8(12) . . ?
 C17F C18F H18F 119.1 . . ?
 C16F C17F H17F 120.3 . . ?
 C18F C17F C16F 119.5(12) . . ?
 C18F C17F H17F 120.3 . . ?
 C13E O1E C16E 116.5(7) . . ?
 O1E C13E C14E 118.3(9) . . ?
 O1E C13E C12E 120.0(10) . . ?
 C12E C13E C14E 121.7(9) . . ?
 C13E C14E H14E 120.3 . . ?
 C15E C14E C13E 119.3(10) . . ?
 C15E C14E H14E 120.3 . . ?
 C14E C15E H15E 120.5 . . ?
 C10E C15E C14E 119.0(10) . . ?
 C10E C15E H15E 120.5 . . ?
 C15E C10E N4B 125.1(9) . . ?
 C11E C10E N4B 114.2(10) . . ?
 C11E C10E C15E 120.7(9) . . ?
 C10E C11E H11E 119.5 . . ?
 C12E C11E C10E 121.0(11) . . ?
 C12E C11E H11E 119.5 . . ?
 C13E C12E H12E 120.9 . . ?
 C11E C12E C13E 118.2(10) . . ?
 C11E C12E H12E 120.9 . . ?
 C17E C16E O1E 124.9(8) . . ?
 C17E C16E C21E 119.4(9) . . ?
 C21E C16E O1E 115.1(8) . . ?
 C16E C17E H17E 119.8 . . ?
 C16E C17E C18E 120.3(10) . . ?
 C18E C17E H17E 119.8 . . ?
 C17E C18E H18E 119.7 . . ?
 C17E C18E C19E 120.5(11) . . ?
 C19E C18E H18E 119.7 . . ?
 C18E C19E N5B 118.5(9) . . ?
 C20E C19E N5B 122.4(8) . . ?
 C20E C19E C18E 118.3(9) . . ?
 C19E C20E H20E 119.6 . . ?
 C19E C20E C21E 120.7(9) . . ?
 C21E C20E H20E 119.6 . . ?
 C16E C21E C20E 120.3(8) . . ?
 C16E C21E H21E 119.8 . . ?
 C20E C21E H21E 119.8 . . ?
 C17D C16D C21D 118.4(11) . . ?
 O1D C16D C21D 121.7(12) . . ?
 O1D C16D C17D 119.8(11) . . ?
 C16D C21D H21D 120.1 . . ?
 C16D C21D C20D 119.8(13) . . ?
 C20D C21D H21D 120.1 . . ?
 C21D C20D H20D 118.7 . . ?
 C19D C20D C21D 122.5(13) . . ?
 C19D C20D H20D 118.7 . . ?
 C20D C19D N5A 120.7(11) . . ?
 C20D C19D C18D 116.5(11) . . ?
 C18D C19D N5A 122.8(12) . . ?
 C19D C18D H18D 119.4 . . ?
 C19D C18D C17D 121.2(11) . . ?
 C17D C18D H18D 119.4 . . ?
 C16D C17D C18D 121.6(11) . . ?
 C16D C17D H17D 119.2 . . ?
 C18D C17D H17D 119.2 . . ?
 C16D O1D C13D 118.1(12) . . ?
 C12D C13D O1D 118.4(12) . . ?
 C12D C13D C14D 119.5(10) . . ?
 C14D C13D O1D 121.7(11) . . ?
 C13D C12D H12D 119.4 . . ?
 C11D C12D C13D 121.2(10) . . ?
 C11D C12D H12D 119.4 . . ?
 C12D C11D H11D 120.4 . . ?
 C12D C11D C10D 119.2(9) . . ?
 C10D C11D H11D 120.4 . . ?
 C11D C10D N4A 114.6(9) . . ?
 C15D C10D N4A 122.9(10) . . ?
 C15D C10D C11D 119.9(10) . . ?
 C10D C15D H15D 119.4 . . ?
 C10D C15D C14D 121.3(13) . . ?
 C14D C15D H15D 119.4 . . ?
 C13D C14D H14D 120.5 . . ?
 C15D C14D C13D 118.9(13) . . ?
 C15D C14D H14D 120.5 . . ?
 C2ET O1ET C3ET 122.6(9) . . ?
 O1ET C2ET C1ET 112.1(9) . . ?
 C4ET C3ET O1ET 116.3(12) . . ?
 C4C C3C N2C 118.8(8) . . ?
 C4C C3C C2C 121.5(9) . . ?
 C2C C3C N2C 118.9(8) . . ?
 C3C C4C H4C 121.5 . . ?
 C5C C4C C3C 117.1(11) . . ?
 C5C C4C H4C 121.5 . . ?
 C3C C2C H2C 122.3 . . ?
 C1C C2C C3C 115.4(10) . . ?
 C1C C2C H2C 122.3 . . ?
 C2C C1C H1C 118.1 . . ?
 N1C C1C C2C 123.8(12) . . ?
 N1C C1C H1C 118.1 . . ?
 C4C C5C H5C 118.7 . . ?
 N1C C5C C4C 122.5(13) . . ?
 N1C C5C H5C 118.7 . . ?
 C1C N1C C5C 119.7(13) . . ?
 C4F C3F N2C 119.0(9) . . ?
 C4F C3F C2F 116.5(11) . . ?
 C2F C3F N2C 121.6(10) . . ?
 C3F C4F H4F 120.5 . . ?
 C3F C4F C5F 119.0(12) . . ?
 C5F C4F H4F 120.5 . . ?
 C3F C2F H2F 121.0 . . ?
 C3F C2F C1F 117.9(14) . . ?
 C1F C2F H2F 121.0 . . ?
 C2F C1F H1F 117.2 . . ?
 N1F C1F C2F 125.6(16) . . ?
 N1F C1F H1F 117.2 . . ?
 C4F C5F H5F 117.8 . . ?
 N1F C5F C4F 124.5(15) . . ?
 N1F C5F H5F 117.8 . . ?
 C5F N1F C1F 116.5(15) . . ?
 C27E C28E N7B 120.1(11) . . ?
 C29E C28E N7B 121.1(10) . . ?
 C29E C28E C27E 118.7(10) . . ?
 C26E N8E C30E 115.6(11) . . ?
 C28E C27E H27E 121.5 . . ?
 C26E C27E C28E 117.0(11) . . ?
 C26E C27E H27E 121.5 . . ?
 C28E C29E H29E 121.6 . . ?
 C28E C29E C30E 116.8(12) . . ?
 C30E C29E H29E 121.6 . . ?
 N8E C30E C29E 126.0(13) . . ?
 N8E C30E H30E 117.0 . . ?
 C29E C30E H30E 117.0 . . ?
 N8E C26E C27E 125.8(12) . . ?
 N8E C26E H26E 117.1 . . ?
 C27E C26E H26E 117.1 . . ?
 C30D N8D C26D 120.3(16) . . ?
 C29D C28D N7A 118.1(15) . . ?
 C29D C28D C27D 124.9(15) . . ?
 C27D C28D N7A 116.1(14) . . ?
 C28D C29D H29D 122.2 . . ?
 C30D C29D C28D 115.7(19) . . ?
 C30D C29D H29D 122.2 . . ?
 N8D C30D C29D 121.6(19) . . ?
 N8D C30D H30D 119.2 . . ?
 C29D C30D H30D 119.2 . . ?
 C28D C27D H27D 123.5 . . ?
 C26D C27D C28D 113.0(14) . . ?
 C26D C27D H27D 123.5 . . ?
 N8D C26D C27D 124.4(16) . . ?
 N8D C26D H26D 117.8 . . ?
 C27D C26D H26D 117.8 . . ?
 O14G Cl4G O15G 109.4 . . ?
 O13G Cl4G O15G 109.5 . . ?
 O13G Cl4G O14G 109.5 . . ?
 O13G Cl4G O16G 109.5 . . ?
 O16G Cl4G O15G 109.4 . . ?
 O16G Cl4G O14G 109.4 . . ?
 O10G Cl3G O9G 109.5 . . ?
 O10G Cl3G O12G 109.5 . . ?
 O11G Cl3G O10G 109.5 . . ?
 O11G Cl3G O9G 109.5 . . ?
 O11G Cl3G O12G 109.5 . . ?
 O9G Cl3G O12G 109.4 . . ?
 O10H Cl3H O11H 109.5 . . ?
 O10H Cl3H O9H 109.5 . . ?
 O10H Cl3H O12H 109.4 . . ?
 O11H Cl3H O9H 109.5 . . ?
 O11H Cl3H O12H 109.4 . . ?
 O9H Cl3H O12H 109.5 . . ?
 O15H Cl4H O14H 109.5 . . ?
 O15H Cl4H O13H 109.5 . . ?
 O15H Cl4H O16H 109.5 . . ?
 O14H Cl4H O13H 109.5 . . ?
 O14H Cl4H O16H 109.5 . . ?
 O13H Cl4H O16H 109.4 . . ?
 N1S2 C1S2 C2S2 177.5(8) . . ?
 C1S2 C2S2 H2SA 109.5 . . ?
 C1S2 C2S2 H2SB 109.5 . . ?
 C1S2 C2S2 H2SC 109.5 . . ?
 H2SA C2S2 H2SB 109.5 . . ?
 H2SA C2S2 H2SC 109.5 . . ?
 H2SB C2S2 H2SC 109.5 . . ?
 O1EV C2EV C1EV 108.8 . . ?
 C3EV O1EV C2EV 113.5 . . ?
 O1EV C3EV C4EV 108.8 . . ?
 N1S1 C1S1 C2S1 178.0(8) . . ?
 C1S1 C2S1 H2SD 109.5 . . ?
 C1S1 C2S1 H2SE 109.5 . . ?
 C1S1 C2S1 H2SF 109.5 . . ?
 H2SD C2S1 H2SE 109.5 . . ?
 H2SD C2S1 H2SF 109.5 . . ?
 H2SE C2S1 H2SF 109.5 . . ?
 N1S4 C1S4 C2S4 177.7(14) . . ?
 C1S4 C2S4 H2SG 109.5 . . ?
 C1S4 C2S4 H2SH 109.5 . . ?
 C1S4 C2S4 H2SI 109.5 . . ?
 H2SG C2S4 H2SH 109.5 . . ?
 H2SG C2S4 H2SI 109.5 . . ?
 H2SH C2S4 H2SI 109.5 . . ?
 N1S5 C1S5 C2S5 173.5(14) . . ?
 C1S5 C2S5 H2SJ 109.5 . . ?
 C1S5 C2S5 H2SK 109.5 . . ?
 C1S5 C2S5 H2SL 109.5 . . ?
 H2SJ C2S5 H2SK 109.5 . . ?
 H2SJ C2S5 H2SL 109.5 . . ?
 H2SK C2S5 H2SL 109.5 . . ?
 N1T4 C1T4 C2T4 179.1(19) . . ?
 C1T4 C2T4 H2TA 109.5 . . ?
 C1T4 C2T4 H2TB 109.5 . . ?
 C1T4 C2T4 H2TC 109.5 . . ?
 H2TA C2T4 H2TB 109.5 . . ?
 H2TA C2T4 H2TC 109.5 . . ?
 H2TB C2T4 H2TC 109.5 . . ?
 N1S3 C1S3 C2S3 180.0 . . ?
 N1T3 C1T3 C2T3 180(2) . . ?

loop_
  _geom_torsion_atom_site_label_1
  _geom_torsion_atom_site_label_2
  _geom_torsion_atom_site_label_3
  _geom_torsion_atom_site_label_4
  _geom_torsion
  _geom_torsion_site_symmetry_1
  _geom_torsion_site_symmetry_2
  _geom_torsion_site_symmetry_3
  _geom_torsion_site_symmetry_4
  _geom_torsion_publ_flag
 Mn2 N6B C25B N7B -176.2(3) . . . . ?
 Mn2 N6B C23B C24B 177.8(3) . . . . ?
 Mn2 N6B C23B C22B 0.3(5) . . . . ?
 Mn2 N6A C23A C22A -5.5(5) . . . . ?
 Mn2 N6A C23A C24A 171.6(3) . . . . ?
 Mn2 N6A C25A N7A -167.8(3) . . . . ?
 Mn2 N6C C23C C24C 175.3(4) . . . . ?
 Mn2 N6C C23C C22C -4.7(6) . . . . ?
 Mn2 N6C C25C N7C -174.4(3) . . . . ?
 Mn2 N5A C22A C23A 1.5(6) . . . . ?
 Mn2 N5A C19A C20A -49.0(16) . . . . ?
 Mn2 N5A C19A C18A 118.9(14) . . . . ?
 Mn2 N5A C19D C20D -58.1(17) . . . . ?
 Mn2 N5A C19D C18D 122.3(17) . . . . ?
 Mn2 N5B C22B C23B -8.2(6) . . . . ?
 Mn2 N5B C19B C18B 86.9(14) . . . . ?
 Mn2 N5B C19B C20B -96.7(13) . . . . ?
 Mn2 N5B C19E C18E 64.6(15) . . . . ?
 Mn2 N5B C19E C20E -105.2(10) . . . . ?
 Mn2 N5C C22C C23C 7.8(8) . . . . ?
 Mn2 N5C C19C C18C 136.1(8) . . . . ?
 Mn2 N5C C19C C20C -55.9(9) . . . . ?
 Mn2 N5C C19F C20F -49.2(12) . . . . ?
 Mn2 N5C C19F C18F 123.8(9) . . . . ?
 Mn1 N3B C6B N2B -172.9(4) . . . . ?
 Mn1 N3B C8B C7B 175.6(3) . . . . ?
 Mn1 N3B C8B C9B -4.6(5) . . . . ?
 Mn1 N3A C8A C7A -178.2(3) . . . . ?
 Mn1 N3A C8A C9A 6.2(5) . . . . ?
 Mn1 N3A C6A N2A 177.4(3) . . . . ?
 Mn1 N3C C6C N2C -166.5(4) . . . . ?
 Mn1 N3C C8C C9C -7.0(7) . . . . ?
 Mn1 N3C C8C C7C 169.5(5) . . . . ?
 Mn1 N4B C9B C8B 4.8(6) . . . . ?
 Mn1 N4B C10B C11B 121.2(13) . . . . ?
 Mn1 N4B C10B C15B -52.6(15) . . . . ?
 Mn1 N4B C10E C15E -43.4(16) . . . . ?
 Mn1 N4B C10E C11E 135.8(10) . . . . ?
 Mn1 N4C C10C C15C -93.8(16) . . . . ?
 Mn1 N4C C10C C11C 90.4(12) . . . . ?
 Mn1 N4C C9C C8C 1.2(7) . . . . ?
 Mn1 N4C C10F C11F 119.9(11) . . . . ?
 Mn1 N4C C10F C15F -55.2(14) . . . . ?
 Mn1 N4A C9A C8A -7.0(6) . . . . ?
 Mn1 N4A C10A C15A -110.1(10) . . . . ?
 Mn1 N4A C10A C11A 77.8(12) . . . . ?
 Mn1 N4A C10D C11D 114.4(10) . . . . ?
 Mn1 N4A C10D C15D -47(2) . . . . ?
 N7B C28B C27B C26B 170.7(18) . . . . ?
 N7B C28B C29B C30B -171.9(19) . . . . ?
 N7B C28E C27E C26E -175.7(15) . . . . ?
 N7B C28E C29E C30E 176.2(17) . . . . ?
 N2B C3B C2B C1B -176.9(5) . . . . ?
 N2B C3B C4B C5B 177.2(5) . . . . ?
 N2B C7B C8B N3B -0.7(5) . . . . ?
 N2B C7B C8B C9B 179.6(5) . . . . ?
 N2A C7A C8A N3A 0.0(5) . . . . ?
 N2A C7A C8A C9A 174.9(5) . . . . ?
 N2A C3A C4A C5A 179.7(4) . . . . ?
 N6B C23B C24B N7B -0.6(5) . . . . ?
 N6B C23B C22B N5B 5.7(7) . . . . ?
 N6A C23A C22A N5A 2.6(7) . . . . ?
 N6A C23A C24A N7A -0.7(6) . . . . ?
 N3B C8B C9B N4B -0.3(7) . . . . ?
 N6C C23C C24C N7C 1.5(6) . . . . ?
 N6C C23C C22C N5C -2.3(9) . . . . ?
 N7A C28A C29A C30A -175.5(10) . . . . ?
 N7A C28A C27A C26A 176.8(8) . . . . ?
 N7A C28D C29D C30D 170(3) . . . . ?
 N7A C28D C27D C26D -172(2) . . . . ?
 N5A C19A C20A C21A 167(2) . . . . ?
 N5A C19A C18A C17A -168.1(17) . . . . ?
 N5A C19D C18D C17D 179.6(16) . . . . ?
 N3A C8A C9A N4A 0.6(7) . . . . ?
 N3C C8C C9C N4C 4.2(9) . . . . ?
 N3C C8C C7C N2C 2.5(8) . . . . ?
 N5B C19B C20B C21B -167.9(12) . . . . ?
 N5B C19E C20E C21E 169.1(12) . . . . ?
 N1A C5A C4A C3A 1.0(7) . . . . ?
 O1A C16A C17A C18A -178.2(15) . . . . ?
 O1A C13A C12A C11A 176.8(16) . . . . ?
 N7C C28C C29C C30C -177.5(5) . . . . ?
 N7C C28C C27C C26C 177.9(6) . . . . ?
 N4B C10B C11B C12B -173.3(14) . . . . ?
 N4B C10B C15B C14B 173.7(10) . . . . ?
 N4B C10E C11E C12E 179.3(12) . . . . ?
 N4C C10C C11C C12C 177.2(11) . . . . ?
 N4C C10F C11F C12F -175.4(15) . . . . ?
 N4C C10F C15F C14F 176.6(17) . . . . ?
 C25B N7B C24B C23B 0.3(5) . . . . ?
 C25B N7B C28B C27B -173.7(9) . . . . ?
 C25B N7B C28B C29B -3(2) . . . . ?
 C25B N7B C28E C27E -167.2(9) . . . . ?
 C25B N7B C28E C29E 17.3(18) . . . . ?
 C25B N6B C23B C24B 0.7(5) . . . . ?
 C25B N6B C23B C22B -176.8(4) . . . . ?
 C23B N6B C25B N7B -0.5(5) . . . . ?
 N5C C19C C18C C17C 168.5(9) . . . . ?
 N5C C19C C20C C21C -170.1(9) . . . . ?
 N5C C19F C18F C17F -171.4(12) . . . . ?
 C3B N2B C6B N3B 176.3(4) . . . . ?
 C3B N2B C7B C8B -175.8(4) . . . . ?
 C3B C2B C1B N1B 0.6(9) . . . . ?
 C3B C4B C5B N1B -1.2(9) . . . . ?
 C6B N2B C3B C2B 5.3(7) . . . . ?
 C6B N2B C3B C4B -172.7(5) . . . . ?
 C6B N2B C7B C8B 0.3(5) . . . . ?
 C6B N3B C8B C7B 0.8(5) . . . . ?
 C6B N3B C8B C9B -179.4(4) . . . . ?
 C24B N7B C25B N6B 0.1(5) . . . . ?
 C24B N7B C28B C27B 3.2(17) . . . . ?
 C24B N7B C28B C29B 174.0(13) . . . . ?
 C24B N7B C28E C27E 5.0(18) . . . . ?
 C24B N7B C28E C29E -170.4(12) . . . . ?
 C24B C23B C22B N5B -171.1(5) . . . . ?
 C28B N7B C25B N6B 177.3(11) . . . . ?
 C28B N7B C24B C23B -177.2(10) . . . . ?
 C28B C27B C26B N8B 1(2) . . . . ?
 C28B C29B C30B N8B 2(3) . . . . ?
 N4A C10A C11A C12A 172.6(12) . . . . ?
 N4A C10D C15D C14D 162.4(16) . . . . ?
 N2C C3C C4C C5C -169.9(11) . . . . ?
 N2C C3C C2C C1C 169.8(11) . . . . ?
 N2C C3F C4F C5F 164.8(13) . . . . ?
 N2C C3F C2F C1F -163.9(12) . . . . ?
 C7A N2A C3A C2A 173.7(4) . . . . ?
 C7A N2A C3A C4A -6.8(7) . . . . ?
 C7A N2A C6A N3A 0.2(5) . . . . ?
 C7A C8A C9A N4A -173.9(6) . . . . ?
 C2B C3B C4B C5B -0.8(8) . . . . ?
 O1B C13B C12B C11B -179.8(10) . . . . ?
 O1B C16B C21B C20B -179.2(12) . . . . ?
 C23A N6A C25A N7A -0.1(5) . . . . ?
 C22B N5B C19B C18B -106.9(14) . . . . ?
 C22B N5B C19B C20B 69.6(15) . . . . ?
 C22B N5B C19E C18E -119.0(13) . . . . ?
 C22B N5B C19E C20E 71.1(11) . . . . ?
 C22B C23B C24B N7B 176.3(4) . . . . ?
 C8A N3A C6A N2A -0.2(5) . . . . ?
 C7B N2B C3B C2B -179.3(4) . . . . ?
 C7B N2B C3B C4B 2.7(7) . . . . ?
 C7B N2B C6B N3B 0.2(5) . . . . ?
 C7B C8B C9B N4B 179.4(5) . . . . ?
 C15C C14C C13C O1C 178.7(15) . . . . ?
 C15C C14C C13C C12C -2.3(18) . . . . ?
 C15C C10C C11C C12C 2(2) . . . . ?
 C23C N6C C25C N7C 0.5(5) . . . . ?
 C25A N6A C23A C22A -176.6(4) . . . . ?
 C25A N6A C23A C24A 0.5(5) . . . . ?
 C25A N7A C28A C29A -0.8(12) . . . . ?
 C25A N7A C28A C27A -179.0(6) . . . . ?
 C25A N7A C24A C23A 0.6(5) . . . . ?
 C25A N7A C28D C29D 28(2) . . . . ?
 C25A N7A C28D C27D -161.8(15) . . . . ?
 C14A C15A C10A N4A -174.5(15) . . . . ?
 C14A C15A C10A C11A -1.4(17) . . . . ?
 C14A C13A C12A C11A -0.1(15) . . . . ?
 C8B N3B C6B N2B -0.6(5) . . . . ?
 C2A C3A C4A C5A -0.8(6) . . . . ?
 C14C C15C C10C N4C -180.0(15) . . . . ?
 C14C C15C C10C C11C -5(3) . . . . ?
 C14C C13C C12C C11C -0.4(11) . . . . ?
 C3A N2A C7A C8A -177.0(4) . . . . ?
 C3A N2A C6A N3A 177.2(4) . . . . ?
 C3A C2A C1A N1A 1.8(7) . . . . ?
 C1A N1A C5A C4A 0.2(7) . . . . ?
 C1A C2A C3A N2A 179.1(4) . . . . ?
 C1A C2A C3A C4A -0.4(6) . . . . ?
 C22A N5A C19A C20A 136.0(10) . . . . ?
 C22A N5A C19A C18A -56.2(19) . . . . ?
 C22A N5A C19D C20D 126.9(15) . . . . ?
 C22A N5A C19D C18D -53(2) . . . . ?
 C22A C23A C24A N7A 175.8(5) . . . . ?
 C25C N6C C23C C24C -1.3(6) . . . . ?
 C25C N6C C23C C22C 178.8(5) . . . . ?
 C25C N7C C24C C23C -1.2(6) . . . . ?
 C25C N7C C28C C29C 8.4(8) . . . . ?
 C25C N7C C28C C27C -169.9(5) . . . . ?
 C19A N5A C22A C23A 177.6(10) . . . . ?
 C19A C20A C21A C16A -0.6(13) . . . . ?
 C19A C18A C17A C16A 3.4(19) . . . . ?
 C15A C14A C13A O1A -177.5(19) . . . . ?
 C15A C14A C13A C12A -0.3(17) . . . . ?
 C15A C10A C11A C12A 1.1(14) . . . . ?
 C9A N4A C10A C15A 69.7(12) . . . . ?
 C9A N4A C10A C11A -102.3(12) . . . . ?
 C9A N4A C10D C11D -81.5(11) . . . . ?
 C9A N4A C10D C15D 116.8(16) . . . . ?
 C28A N7A C25A N6A 179.7(6) . . . . ?
 C28A N7A C24A C23A -179.4(7) . . . . ?
 C28A C29A C30A N8A -2.4(16) . . . . ?
 C28A C27A C26A N8A -0.4(12) . . . . ?
 C6A N2A C7A C8A -0.1(5) . . . . ?
 C6A N2A C3A C2A -2.7(6) . . . . ?
 C6A N2A C3A C4A 176.8(4) . . . . ?
 C6A N3A C8A C7A 0.1(5) . . . . ?
 C6A N3A C8A C9A -175.5(4) . . . . ?
 C4B C3B C2B C1B 1.1(8) . . . . ?
 C24A N7A C25A N6A -0.4(6) . . . . ?
 C24A N7A C28A C29A 179.3(8) . . . . ?
 C24A N7A C28A C27A 1.0(12) . . . . ?
 C24A N7A C28D C29D -169.9(14) . . . . ?
 C24A N7A C28D C27D 0(3) . . . . ?
 C24A C23A C22A N5A -173.7(5) . . . . ?
 C9B N4B C10B C11B -41.1(17) . . . . ?
 C9B N4B C10B C15B 145.0(9) . . . . ?
 C9B N4B C10E C15E 138.1(12) . . . . ?
 C9B N4B C10E C11E -42.8(16) . . . . ?
 C20A C19A C18A C17A -1.6(15) . . . . ?
 C20A C21A C16A O1A 176.8(17) . . . . ?
 C20A C21A C16A C17A 2.5(14) . . . . ?
 C24C N7C C25C N6C 0.4(5) . . . . ?
 C24C N7C C28C C29C -173.2(6) . . . . ?
 C24C N7C C28C C27C 8.5(8) . . . . ?
 C24C C23C C22C N5C 177.8(6) . . . . ?
 C27B C28B C29B C30B -1(2) . . . . ?
 C5A N1A C1A C2A -1.6(7) . . . . ?
 C10B N4B C9B C8B 171.6(8) . . . . ?
 C10B C11B C12B C13B 1.2(18) . . . . ?
 C10B C15B C14B C13B 0.8(13) . . . . ?
 C6C N3C C8C C9C -178.0(6) . . . . ?
 C6C N3C C8C C7C -1.5(7) . . . . ?
 C6C N2C C7C C8C -2.6(8) . . . . ?
 C6C N2C C3C C4C -136.9(8) . . . . ?
 C6C N2C C3C C2C 53.2(11) . . . . ?
 C6C N2C C3F C4F -151.1(11) . . . . ?
 C6C N2C C3F C2F 8.9(19) . . . . ?
 C8C N3C C6C N2C -0.2(7) . . . . ?
 C18B C19B C20B C21B 9(2) . . . . ?
 C18B C17B C16B O1B -178.4(14) . . . . ?
 C18B C17B C16B C21B 0.6(11) . . . . ?
 C29B C28B C27B C26B 0.0(16) . . . . ?
 C1B N1B C5B C4B 2.8(9) . . . . ?
 C28C N7C C25C N6C 179.1(4) . . . . ?
 C28C N7C C24C C23C -179.9(5) . . . . ?
 C28C C29C C30C N8C -1.7(11) . . . . ?
 C28C C27C C26C N8C 0.9(12) . . . . ?
 C21A C16A C17A C18A -4(2) . . . . ?
 C10C N4C C9C C8C 177.3(8) . . . . ?
 C10C C15C C14C C13C 4(3) . . . . ?
 C10C C11C C12C C13C 0.7(13) . . . . ?
 C29A C28A C27A C26A -1.6(12) . . . . ?
 C19B N5B C22B C23B -174.8(8) . . . . ?
 C19B C18B C17B C16B 1.6(18) . . . . ?
 C19B C20B C21B C16B -6.5(18) . . . . ?
 C22C N5C C19C C18C -16.9(13) . . . . ?
 C22C N5C C19C C20C 151.1(7) . . . . ?
 C22C N5C C19F C20F 124.9(10) . . . . ?
 C22C N5C C19F C18F -62.0(12) . . . . ?
 C22C C23C C24C N7C -178.5(6) . . . . ?
 C9C N4C C10C C15C 90.4(16) . . . . ?
 C9C N4C C10C C11C -85.4(14) . . . . ?
 C9C N4C C10F C11F -62.1(14) . . . . ?
 C9C N4C C10F C15F 122.8(11) . . . . ?
 C9C C8C C7C N2C 178.6(6) . . . . ?
 C5B N1B C1B C2B -2.5(9) . . . . ?
 C16C O1C C13C C14C 176.4(11) . . . . ?
 C16C O1C C13C C12C -2.5(14) . . . . ?
 C30A N8A C26A C27A 1.0(12) . . . . ?
 C16A O1A C13A C14A 162.3(13) . . . . ?
 C16A O1A C13A C12A -15(2) . . . . ?
 C18A C19A C20A C21A 0.2(15) . . . . ?
 C11B C10B C15B C14B -0.8(19) . . . . ?
 C13A O1A C16A C21A 116.7(17) . . . . ?
 C13A O1A C16A C17A -68.8(19) . . . . ?
 C13A C14A C15A C10A 1(2) . . . . ?
 C15B C10B C11B C12B -0.2(19) . . . . ?
 C15B C14B C13B O1B 178.8(10) . . . . ?
 C15B C14B C13B C12B 0.1(11) . . . . ?
 C14B C13B C12B C11B -1.2(16) . . . . ?
 C13B O1B C16B C17B -7.5(16) . . . . ?
 C13B O1B C16B C21B 173.5(10) . . . . ?
 C29C C28C C27C C26C -0.4(9) . . . . ?
 C10A N4A C9A C8A 173.2(7) . . . . ?
 C10A C11A C12A C13A -0.3(18) . . . . ?
 C17B C18B C19B N5B 170.6(13) . . . . ?
 C17B C18B C19B C20B -6(2) . . . . ?
 C17B C16B C21B C20B 1.8(14) . . . . ?
 C19C N5C C22C C23C 163.6(7) . . . . ?
 C19C C18C C17C C16C -1.1(13) . . . . ?
 C19C C20C C21C C16C 0.5(10) . . . . ?
 C30B N8B C26B C27B -1(3) . . . . ?
 O1C C16C C17C C18C -179.6(10) . . . . ?
 O1C C16C C21C C20C 179.9(11) . . . . ?
 O1C C13C C12C C11C 178.4(10) . . . . ?
 C18C C19C C20C C21C -1.9(12) . . . . ?
 C26B N8B C30B C29B -1(3) . . . . ?
 C30C N8C C26C C27C -1.7(13) . . . . ?
 C16B O1B C13B C14B 96.7(12) . . . . ?
 C16B O1B C13B C12B -84.6(14) . . . . ?
 C27A C28A C29A C30A 2.8(13) . . . . ?
 C26A N8A C30A C29A 0.3(15) . . . . ?
 C7C N2C C6C N3C 1.8(7) . . . . ?
 C7C N2C C3C C4C 20.0(14) . . . . ?
 C7C N2C C3C C2C -149.9(9) . . . . ?
 C7C N2C C3F C4F 43.0(15) . . . . ?
 C7C N2C C3F C2F -157.0(12) . . . . ?
 C7C C8C C9C N4C -171.4(7) . . . . ?
 C27C C28C C29C C30C 0.8(9) . . . . ?
 C17C C16C O1C C13C -98.4(12) . . . . ?
 C17C C16C C21C C20C 0.5(11) . . . . ?
 C20C C19C C18C C17C 2.2(12) . . . . ?
 C21C C16C O1C C13C 82.1(12) . . . . ?
 C21C C16C C17C C18C -0.2(13) . . . . ?
 C26C N8C C30C C29C 2.1(12) . . . . ?
 C10F N4C C9C C8C -177.3(7) . . . . ?
 C10F C11F C12F C13F 1(2) . . . . ?
 C10F C15F C14F C13F -3(3) . . . . ?
 C11F C10F C15F C14F 0.8(17) . . . . ?
 C11F C12F C13F C14F -3(2) . . . . ?
 C11F C12F C13F O1F -176.9(12) . . . . ?
 C15F C10F C11F C12F 0.0(15) . . . . ?
 C15F C14F C13F C12F 3(3) . . . . ?
 C15F C14F C13F O1F 177.9(15) . . . . ?
 C12F C13F O1F C16F -54.4(17) . . . . ?
 C14F C13F O1F C16F 131.5(17) . . . . ?
 C13F O1F C16F C21F 121.7(10) . . . . ?
 C13F O1F C16F C17F -60.7(16) . . . . ?
 O1F C16F C21F C20F -179.3(9) . . . . ?
 O1F C16F C17F C18F 179.1(12) . . . . ?
 C16F C21F C20F C19F 0.1(12) . . . . ?
 C21F C16F C17F C18F -3(2) . . . . ?
 C21F C20F C19F N5C 170.3(8) . . . . ?
 C21F C20F C19F C18F -2.7(15) . . . . ?
 C20F C19F C18F C17F 2.3(18) . . . . ?
 C19F N5C C22C C23C -166.8(7) . . . . ?
 C19F C18F C17F C16F 1(2) . . . . ?
 C17F C16F C21F C20F 3.0(13) . . . . ?
 O1E C13E C14E C15E 178.8(10) . . . . ?
 O1E C13E C12E C11E 179.4(10) . . . . ?
 O1E C16E C17E C18E -177.9(15) . . . . ?
 O1E C16E C21E C20E 177.3(11) . . . . ?
 C13E O1E C16E C17E -10.1(18) . . . . ?
 C13E O1E C16E C21E 178.3(11) . . . . ?
 C13E C14E C15E C10E 1.0(14) . . . . ?
 C14E C13E C12E C11E -2.1(16) . . . . ?
 C14E C15E C10E N4B 178.7(12) . . . . ?
 C14E C15E C10E C11E -0.4(19) . . . . ?
 C15E C10E C11E C12E -1(2) . . . . ?
 C10E N4B C9B C8B -176.6(9) . . . . ?
 C10E C11E C12E C13E 2.7(18) . . . . ?
 C12E C13E C14E C15E 0.3(13) . . . . ?
 C16E O1E C13E C14E 104.2(11) . . . . ?
 C16E O1E C13E C12E -77.3(14) . . . . ?
 C16E C17E C18E C19E 4(3) . . . . ?
 C17E C16E C21E C20E 5.2(17) . . . . ?
 C17E C18E C19E N5B -170.9(15) . . . . ?
 C17E C18E C19E C20E -1(2) . . . . ?
 C18E C19E C20E C21E -0.8(15) . . . . ?
 C19E N5B C22B C23B 174.5(6) . . . . ?
 C19E C20E C21E C16E -1.5(14) . . . . ?
 C21E C16E C17E C18E -7(2) . . . . ?
 C16D C21D C20D C19D -1.2(16) . . . . ?
 C16D O1D C13D C12D -69.5(19) . . . . ?
 C16D O1D C13D C14D 117.3(19) . . . . ?
 C21D C16D C17D C18D -1(2) . . . . ?
 C21D C16D O1D C13D 136.0(17) . . . . ?
 C21D C20D C19D N5A -178.9(19) . . . . ?
 C21D C20D C19D C18D 1(2) . . . . ?
 C20D C19D C18D C17D 0(2) . . . . ?
 C19D N5A C22A C23A 176.8(9) . . . . ?
 C19D C18D C17D C16D 0(2) . . . . ?
 C17D C16D C21D C20D 1.1(15) . . . . ?
 C17D C16D O1D C13D -48(2) . . . . ?
 O1D C16D C21D C20D 177.1(19) . . . . ?
 O1D C16D C17D C18D -176.6(15) . . . . ?
 O1D C13D C12D C11D -173.4(15) . . . . ?
 O1D C13D C14D C15D 173.1(19) . . . . ?
 C13D C12D C11D C10D 0.9(15) . . . . ?
 C12D C13D C14D C15D 0(3) . . . . ?
 C12D C11D C10D N4A -164.0(11) . . . . ?
 C12D C11D C10D C15D -2(2) . . . . ?
 C11D C10D C15D C14D 2(3) . . . . ?
 C10D N4A C9A C8A -175.1(6) . . . . ?
 C10D C15D C14D C13D -1(3) . . . . ?
 C14D C13D C12D C11D 0.0(17) . . . . ?
 C2ET O1ET C3ET C4ET 50.4(18) . . . . ?
 C3ET O1ET C2ET C1ET 164.8(10) . . . . ?
 C3C N2C C6C N3C 164.4(6) . . . . ?
 C3C N2C C7C C8C -161.2(8) . . . . ?
 C3C C4C C5C N1C 0(2) . . . . ?
 C3C C2C C1C N1C 0(2) . . . . ?
 C4C C3C C2C C1C 0.2(13) . . . . ?
 C4C C5C N1C C1C 0(2) . . . . ?
 C2C C3C C4C C5C -0.3(14) . . . . ?
 C2C C1C N1C C5C 0(2) . . . . ?
 C3F N2C C6C N3C -164.9(10) . . . . ?
 C3F N2C C7C C8C 167.5(7) . . . . ?
 C3F C4F C5F N1F -2(3) . . . . ?
 C3F C2F C1F N1F 1.1(17) . . . . ?
 C4F C3F C2F C1F -3(2) . . . . ?
 C4F C5F N1F C1F -1(2) . . . . ?
 C2F C3F C4F C5F 4(2) . . . . ?
 C2F C1F N1F C5F 1.0(18) . . . . ?
 C28E N7B C25B N6B 174.0(9) . . . . ?
 C28E N7B C24B C23B -172.8(10) . . . . ?
 C28E C27E C26E N8E -0.5(18) . . . . ?
 C28E C29E C30E N8E -1(2) . . . . ?
 C27E C28E C29E C30E 0.7(18) . . . . ?
 C29E C28E C27E C26E -0.2(14) . . . . ?
 C30E N8E C26E C27E 0.6(19) . . . . ?
 C26E N8E C30E C29E 0(2) . . . . ?
 C28D N7A C25A N6A 163.3(19) . . . . ?
 C28D N7A C24A C23A -164.8(18) . . . . ?
 C28D C29D C30D N8D 0(3) . . . . ?
 C28D C27D C26D N8D 3(3) . . . . ?
 C29D C28D C27D C26D -3(2) . . . . ?
 C30D N8D C26D C27D -2(3) . . . . ?
 C27D C28D C29D C30D 1(2) . . . . ?
 C26D N8D C30D C29D 1(3) . . . . ?
 C1EV C2EV O1EV C3EV -180.0 . . . . ?
 C2EV O1EV C3EV C4EV 180.0 . . . . ?

_smtbx_masks_special_details
;
A solvent mask was calculated and 72 electrons were 
found in a volume of 221 A^3 in 1 void per unit cell. 
This is attributed to the presence of an unknown
combination of solvent molecules per Asymmetric Unit 
which for which low residual electron density
prevented modelling.
;
loop_
  _smtbx_masks_void_nr
  _smtbx_masks_void_average_x
  _smtbx_masks_void_average_y
  _smtbx_masks_void_average_z
  _smtbx_masks_void_volume
  _smtbx_masks_void_count_electrons
  _smtbx_masks_void_content
 1 0.500 0.500 0.000 221.2 71.8 '2 Unknown'

_smtbx_masks_void_probe_radius     1.2
_smtbx_masks_void_truncation_radius  1.2
_shelx_res_file
;
TITL mn_a.res in P-1
    mn.res
    created by SHELXL-2018/3 at 17:59:02 on 30-Nov-2022
REM Old TITL Mn in P-1
REM SHELXT solution in P-1: R1 0.389, Rweak 0.031, Alpha 0.096
REM <I/s> 0.000 for 0 systematic absences, Orientation as input
REM Formula found by SHELXT: C249 N58 O12 Cl8 Mn4
CELL 0.71073 16.06 18.19 20.48 79.381 88.854 73.395
ZERR 2 0.0032 0.0036 0.0041 0.03 0.03 0.03
LATT 1
SFAC C H Cl Mn N O
UNIT 210 151 8 4 57 41
SADI C16B C17B C19B C18B C17B C18B C20B C19B C21B C20B C21B C16B
FLAT C16B C17B C18B C19B C20B C21B
FLAT C14B C13B C11B C12B C10B C15B
SADI C12B C13B C12B C11B C11B C10B C15B C10B C14B C15B C13B C14B
FLAT C20C C19C C18C C17C C16C C21C
SADI C14C C15C C10C C15C C11C C10C C12C C11C C12C C13C
FLAT C13C C12C C11C C10C C15C C14C
SADI C21C C20C C20C C19C C21C C16C C17C C16C C17C C18C C18C C19C
SADI C16A C21A C21A C20A C20A C19A C18A C19A C17A C18A
FLAT C18A C19A C20A C21A C16A C17A
SADI C12A C13A C12A C11A C11A C10A C10A C15A C15A C14A C13A C14A
FLAT C15A C10A C11A C12A C13A C14A
FLAT C27A C26A N8A C30A C29A C28A
SADI C30C C29C C29C C28C C27C C28C C26C C27C
SADI C1A C2A C3A C2A C4A C3A C4A C5A
SADI N1A C5A N1A C1A
FLAT C1A C2A C3A C4A C5A N1A
SADI N8C C26C N8C C30C
FLAT C28C C27C C26C N8C C30C C29C
SADI N8A C26A N8A C30A
SADI C30A C29A C29A C28A C27A C28A C26A C27A
SADI C26B C27B C27B C28B C29B C28B C30B C29B
SADI N8B C26B N8B C30B
FLAT C28B N8B C27B C29B C30B C26B
FLAT C16C C21C C20C C19C C18C C17C
SADI C20C C19C C21C C20C C21C C16C C17C C16C C17C C18C C18C C19C
RIGU C28B N8B C27B C29B C30B C26B
DANG 2.7 C27C C29C
DANG 2.7 C30C C26C
DANG 2.8 C18C C20C
DANG 2.8 C17C C21C
DANG 2.8 C16C C19C
SADI C19C C18C C19F C18F
SADI 0.04 C19C C21C C19F C21F
SADI C19C C20C C19F C20F
SADI 0.04 C18C C20C C18F C20F
SADI 0.04 O1C C12C O1F C12F
SADI C16C C17C C16F C17F
SADI O1C C13C O1F C13F
SADI N4C C10C N4C C10F
SADI N5C C19C N5C C19F
SADI C15C C14C C15F C14F
SADI C15C C10C C15F C10F
SADI 0.04 C17C C21C C17F C21F
SADI C13C C12C C13F C12F
SADI 0.04 O1C C17C O1F C17F
SADI C20C C21C C20F C21F
SADI C11C C12C C11F C12F
SADI C16C C21C C16F C21F
SADI 0.04 C19C C17C C19F C17F
SADI 0.04 N4C C15C N4C C15F
SADI 0.04 N4C C11C N4C C11F
SADI 0.04 O1C C21C O1F C21F
SADI 0.04 N5C C18C N5C C18F
SADI 0.04 N5C C20C N5C C20F
SADI 0.04 C15C C13C C15F C13F
SADI 0.04 C15C C11C C15F C11F
SADI C16C O1C C16F O1F
SADI 0.04 C14C C10C C14F C10F
SADI 0.04 C13C C11C C13F C11F
SADI C14C C13C C14F C13F
SADI C10C C11C C10F C11F
SADI 0.04 C16C C18C C16F C18F
SADI 0.04 C16C C13C C16F C13F
SADI 0.04 C16C C20C C16F C20F
SADI 0.04 C14C O1C C14F O1F
SADI 0.04 C14C C12C C14F C12F
SADI C18C C17C C18F C17F
SADI 0.04 C10C C12C C10F C12F
SADI C17F C16F C18F C17F C18F C19F C19F C20F C21F C20F C21F C16F
FLAT C21C C16C C17C C18C C19C C20C
SADI C12F C11F C10F C11F C15F C10F C14F C15F C14F C13F C12F C13F
FLAT C16F C21F C20F C19F C18F C17F
FLAT C10F C11F C15F C12F C14F C13F
SADI C12C C13C C12C C11C C11C C10C C10C C15C C14C C15C C13C C14C
FLAT C14C C13C C12C C11C C10C C15C
SADI C17C C16C C17C C18C C18C C19C C20C C19C C21C C20C C21C C16C
SADI C18B C19B C18E C19E
SADI C18B C17B C18E C17E
SADI C19B C20B C19E C20E
SADI C21B C16B C16B C17B C17B C18B C19B C18B C20B C19B C21B C20B
SADI 0.04 C15B C13B C15E C13E
SADI O1B C13B O1E C13E
SADI C11B C12B C11E C12E
SADI 0.04 C18B C20B C18E C20E
SADI 0.04 C11B C15B C11E C15E
SADI C13B C12B C13E C12E
SADI N5B C19B N5B C19E
SADI N4B C10B N4B C10E
SADI C15B C14B C15E C14E
SADI O1B C16B O1E C16E
SADI C17B C16B C17E C16E
SADI C16B C21B C16E C21E
SADI 0.04 C18B C16B C18E C16E
SADI 0.04 C19B C17B C19E C17E
SADI 0.04 C19B C21B C19E C21E
SADI 0.04 C17B C21B C17E C21E
SADI C20B C21B C20E C21E
SADI 0.04 C14B C12B C14E C12E
SADI 0.04 C13B C16B C13E C16E
SADI 0.04 C16B C20B C16E C20E
SADI 0.04 C11B C13B C11E C13E
SADI C14B C13B C14E C13E
FLAT C21B C16B C17B C18B C19B C20B
FLAT C21E C20E C19E C18E C17E C16E
SADI 0.04 C10B C14B C10E C14E
SADI 0.04 C10B C12B C10E C12E
SADI C13B C14B C14B C15B C15B C10B C11B C10B C12B C11B C12B C13B
SADI C13E C14E C14E C15E C15E C10E C11E C10E C13E C12E C12E C11E
SADI C17E C16E C18E C17E C19E C18E C19E C20E C21E C20E C21E C16E
SADI 0.04 N5B C18B N5B C18E
SADI 0.04 N5B C20B N5B C20E
SADI C10B C11B C10E C11E
SADI 0.04 N4B C11B N4B C11E
SADI 0.04 N4B C15B N4B C15E
SADI C10B C15B C10E C15E
SADI 0.04 O1B C14B O1E C14E
SADI 0.04 O1B C17B O1E C17E
SADI 0.04 O1B C12B O1E C12E
SADI 0.04 O1B C21B O1E C21E
FLAT C13B C14B C15B C10B C11B C12B
FLAT C13E C14E C15E C10E C11E C12E
SADI C20A C21A C20D C21D
SADI C21A C16A C21D C16D
SADI C16A C21A C21A C20A C20A C19A C18A C19A C17A C18A C17A C16A
SADI C19A C20A C19D C20D
SADI C16A C17A C16D C17D
SADI C18A C17A C18D C17D
SADI O1A C13A O1D C13D
SADI C14A C13A C14D C13D
SADI C13A C12A C13D C12D
SADI 0.04 C16A C18A C16D C18D
SADI C10A C11A C10D C11D
SADI 0.04 C10A C12A C10D C12D
SADI C11A C12A C11D C12D
SADI C13D C12D C11D C12D C11D C10D C10D C15D C14D C15D C13D C14D
SADI N4A C10A N4A C10D
SADI N5A C19A N5A C19D
FLAT C16A C21A C20A C19A C18A C17A
SADI O1A C16A O1D C16D
SADI 0.04 C21A C17A C21D C17D
SADI 0.04 N5A C20A N5A C20D
SADI 0.04 N5A C18A N5A C18D
SADI 0.04 O1A C14A O1D C14D
SADI 0.04 O1A C21A O1D C21D
SADI 0.04 O1A C17A O1D C17D
SADI 0.04 O1A C12A O1D C12D
SADI 0.04 C16A C13A C16D C13D
FLAT C13D C12D C11D C10D C15D C14D
SADI 0.04 N4A C15A N4A C15D
SADI 0.04 C13A C11A C13D C11D
SADI 0.04 N4A C11A N4A C11D
SADI 0.04 C14A C10A C14D C10D
SADI 0.04 C14A C12A C14D C12D
SADI 0.04 C19A C21A C19D C21D
SADI 0.04 C19A C17A C19D C17D
SADI 0.04 C15A C13A C15D C13D
SADI 0.04 C15A C11A C15D C11D
SADI C13A C14A C12A C13A C12A C11A C11A C10A C10A C15A C15A C14A
SADI C21D C16D C20D C21D C19D C20D C19D C18D C18D C17D C17D C16D
SADI C14A C15A C14D C15D
SADI 0.04 C20A C16A C20D C16D
SADI C19A C18A C19D C18D
SADI 0.04 C20A C18A C20D C18D
SADI C15A C10A C15D C10D
FLAT C14A C13A C12A C11A C10A C15A
FLAT C16D C21D C20D C19D C18D C17D
DFIX 1.4 C2C C1C C3C C2C C4C C3C C5C C4C
RIGU C3C C4C C2C C1C C5C N1C
DFIX 1.3 N1C C5C N1C C1C
FLAT C3C C4C C2C C1C C5C N1C
SADI C5C N1C C5F N1F
SADI 0.04 C4C N1C C4F N1F
DFIX 1.3 N1F C5F N1F C1F
SADI 0.04 C4C C2C C4F C2F
SADI C3C C4C C3F C4F
SADI C1C N1C C1F N1F
SADI 0.04 C3C C5C C3F C5F
SADI 0.04 N2C C4C N2C C4F
DFIX 1.4 C5F C4F C4F C3F C3F C2F C2F C1F
RIGU N1F C5F C4F C3F C2F C1F
SADI 0.04 C1C C5C C1F C5F
SADI 0.04 N2C C2C N2C C2F
SADI N2C C3C N2C C3F
SADI C3C C2C C3F C2F
SADI C4C C5C C4F C5F
SADI C2C C1C C2F C1F
SADI 0.04 C3C C1C C3F C1F
FLAT N1F C1F C2F C3F C4F C5F
SADI 0.04 C2C N1C C2F N1F
FLAT N3C N2C C6C C8C C7C
DFIX 1.37 N2A C7A
DFIX 1.32 N3A C6A
DFIX 1.44 C9A C8A
DFIX 1.38 N3A C8A
DFIX 1.28 N4A C9A
DFIX 1.36 C8A C7A
DFIX 1.37 N2A C6A
RIGU N1A C2A C3A C1A C5A C4A
RIGU N2A C6A N3A C8A C7A
RIGU C16E C21E C20E C19E C18E C17E
RIGU C16F C21F C20F C19F C18F C17F
RIGU C10A C15A C14A C13A C12A C11A
RIGU C16D C21D C20D C19D C18D C17D
RIGU C18A C19A C20A C21A C16A C17A
RIGU C11E C12E C13E C14E C15E C10E
RIGU C19B C18B C17B C16B C21B C20B
RIGU C10D C15D C14D C13D C12D C11D
RIGU C13B C14B C15B C10B C11B C12B
RIGU C10F C15F C14F C13F C12F C11F
RIGU C15C C10C C11C C12C C13C C14C
RIGU C16C C17C C18C C19C C20C C21C
RIGU N8A C28A C29A C30A C27A C26A
RIGU C28C N8C C29C C30C C27C C26C
SADI 0.04 N8B C27B N8E C27E
SADI 0.04 N8B C29B N8E C29E
SADI N8B C26B N8E C26E
SADI C28B C29B C28E C29E
SADI 0.04 C28B C26B C28E C26E
SADI 0.04 C27B C29B C27E C29E
SADI C27B C26B C27E C26E
SADI 0.04 N7B C29B N7B C29E
SADI N7B C28B N7B C28E
SADI C28B C27B C28E C27E
SADI N8B C30B N8E C30E
SADI 0.04 C30B C26B C30E C26E
SADI C29B C30B C29E C30E
SADI 0.04 N7B C27B N7B C27E
SADI 0.04 C28B C30B C28E C30E
FLAT C28E N8E C27E C29E C30E C26E
SADI N8E C26E N8E C30E
SADI C26E C27E C27E C28E C29E C28E C30E C29E
RIGU C28E N8E C27E C29E C30E C26E
SADI N8A C30A N8D C30D
SADI 0.04 C28A C30A C28D C30D
SADI 0.04 N8A C27A N8D C27D
SADI 0.04 C29A C27A C29D C27D
SADI 0.04 N7A C27A N7A C27D
FLAT N8D C28D C29D C30D C27D C26D
SADI N7A C28A N7A C28D
SADI N8D C30D N8D C26D
SADI C27A C26A C27D C26D
SADI C30D C29D C29D C28D C28D C27D C27D C26D
SADI N8A C26A N8D C26D
SADI 0.04 N7A C29A N7A C29D
SADI 0.04 N8A C29A N8D C29D
SADI C28A C29A C28D C29D
SADI C28A C27A C28D C27D
RIGU N8D C28D C29D C30D C27D C26D
SADI 0.04 C28A C26A C28D C26D
SADI C29A C30A C29D C30D
SADI 0.04 C30A C26A C30D C26D
RIGU O9G Cl3G O10G O11G O12G
RIGU O16G Cl4G O15G O14G O13G
SADI 0.04 O10G O12G O10H O12H
SADI 0.04 O9G O12G O9H O12H
SADI Cl3G O12G Cl3H O12H
SADI 0.04 O10G O11G O10H O11H
SADI 0.04 O11G O9G O11H O9H
SADI Cl3G O11G Cl3H O11H
SADI 0.04 O10G O9G O10H O9H
SADI 0.04 O11G O12G O11H O12H
SADI Cl3G O10G Cl3H O10H
SADI Cl3G O9G Cl3H O9H
RIGU Cl3H O10H O11H O9H O12H
SADI 0.04 O13G O16G O13H O16H
SADI Cl4G O16G Cl4H O16H
SADI 0.04 O14G O16G O14H O16H
SADI Cl4G O13G Cl4H O13H
SADI 0.04 O14G O13G O14H O13H
SADI 0.04 O15G O14G O15H O14H
SADI 0.04 O15G O13G O15H O13H
SADI 0.04 O15G O16G O15H O16H
RIGU O13H Cl4H O15H O14H O16H
SADI Cl4G O15G Cl4H O15H
SADI Cl4G O14G Cl4H O14H
RIGU O13G Cl4G O15G O14G O16G
DANG 2.39 O1ET C1ET
DANG 2.39 O1ET C4ET
DFIX 1.52 C4ET C3ET C2ET C1ET
DANG 2.38 C3ET C2ET
DFIX 1.42 O1ET C2ET O1ET C3ET
RIGU C2ET O1ET C3ET C1ET C4ET
DFIX 1.45 C1S4 C2S4
DANG 2.62 N1S4 C2S4
SADI N1S4 C1S4 N1T4 C1T4
SADI C1S4 C2S4 C1T4 C2T4
DFIX 1.45 C1T4 C2T4
SADI 0.04 N1S4 C2S4 N1T4 C2T4
DANG 2.62 N1T4 C2T4
DFIX 1.16 N1S4 C1S4
DFIX 1.16 N1T4 C1T4
RIGU C1S4 N1S4 C2S4 C1T4 N1T4 C2T4
SADI N1S3 C1S3 N1T3 C1T3
SADI 0.04 N1S3 C2S3 N1T3 C2T3
SADI C1S3 C2S3 C1T3 C2T3
RIGU C2S3 N1S3 C1S3
RIGU C2T3 N1T3 C1T3
EADP C28A C28D

L.S. 20 0 0
PLAN  80
SIZE 0.2 0.2 0.02
TEMP -173.15
CONF
FREE C10D C9A
FREE C21C C19C
FREE C12A C14A
FREE C26C C30C
BOND
list 4
MORE -1
BOND $H
ABIN
fmap 2 53
ACTA
REM <olex2.extras>
REM <HklSrc "%.\\Mn.hkl">
REM </olex2.extras>

WGHT    0.200000
FVAR       0.26174   0.52429   0.45742   0.48789   0.52393   0.37588   0.73844
FVAR       0.60180   0.68101   0.66137   0.51599
MN2   4    0.208816    0.216782    0.953802    11.00000    0.05086    0.08867 =
         0.06513   -0.02074    0.00006   -0.01635
MN1   4    0.760659    0.292300    0.592984    11.00000    0.04812    0.17426 =
         0.08011   -0.06862    0.00846   -0.03050
N7B   5   -0.021822    0.422124    0.938364    11.00000    0.06611    0.06670 =
         0.04973   -0.01386    0.00383   -0.01518
N2B   5    0.997001    0.107671    0.566483    11.00000    0.05900    0.09383 =
         0.05188   -0.02057    0.00703   -0.02878
N2A   5    0.888254    0.481331    0.581219    11.00000    0.04614    0.13806 =
         0.04410   -0.02104    0.00079   -0.01770
N6B   5    0.096111    0.322009    0.948147    11.00000    0.05712    0.07453 =
         0.06592   -0.02001    0.00428   -0.02105
N6A   5    0.155909    0.119440    0.948532    11.00000    0.05808    0.08418 =
         0.07116   -0.02291   -0.00758   -0.01526
N3B   5    0.881164    0.202594    0.583339    11.00000    0.05819    0.12042 =
         0.05314   -0.03251    0.00508   -0.03017
N6C   5    0.214068    0.199429    1.064811    11.00000    0.07411    0.09359 =
         0.06602   -0.01672    0.00130   -0.04254
N7A   5    0.121230    0.008944    0.954536    11.00000    0.06098    0.09200 =
         0.08702   -0.03677   -0.01494   -0.01457
N5A   5    0.196727    0.213738    0.842090    11.00000    0.04991    0.11360 =
         0.06179   -0.01913   -0.00167   -0.01992
N3A   5    0.820677    0.389970    0.588682    11.00000    0.04957    0.15923 =
         0.06094   -0.04338    0.00908   -0.02839
N3C   5    0.718439    0.313356    0.485540    11.00000    0.04587    0.10260 =
         0.09073   -0.03465   -0.00706   -0.01052
N5B   5    0.267560    0.320399    0.937623    11.00000    0.05691    0.12005 =
         0.06394   -0.03398    0.01292   -0.03350
N1A   5    1.094583    0.582867    0.575567    11.00000    0.07059    0.13864 =
         0.04936   -0.00498   -0.00020   -0.03584
PART 1
O1A   6    0.302849    0.396181    0.634735    41.00000    0.04140    0.10788 =
         0.07752   -0.00151   -0.00325   -0.01125
PART 0
N7C   5    0.214304    0.192466    1.173875    11.00000    0.10907    0.10134 =
         0.06031   -0.01616    0.00449   -0.06378
N4B   5    0.805669    0.231997    0.700244    11.00000    0.05539    0.17296 =
         0.06363   -0.05721    0.01457   -0.04776
N4C   5    0.667211    0.219195    0.591416    11.00000    0.05475    0.13382 =
         0.05643   -0.03443    0.00096   -0.00844
N1B   5    1.177193   -0.041707    0.462354    11.00000    0.08621    0.08893 =
         0.08810   -0.03605    0.00752   -0.02382
C25B  1    0.011769    0.342615    0.945650    11.00000    0.05505    0.07092 =
         0.06592   -0.01634    0.00250   -0.01724
AFIX  43
H25B  2   -0.022298    0.307254    0.948495    11.00000   -1.20000
AFIX   0
C23B  1    0.119916    0.390348    0.941773    11.00000    0.06669    0.08399 =
         0.05594   -0.01989    0.00695   -0.03022
N5C   5    0.343994    0.134363    0.986632    11.00000    0.04989    0.14796 =
         0.06118   -0.00160    0.00009   -0.01265
C3B   1    1.060334    0.058268    0.531302    11.00000    0.06328    0.08271 =
         0.06167   -0.02174    0.00566   -0.02975
C6B   1    0.932026    0.171718    0.538590    11.00000    0.05917    0.09610 =
         0.05515   -0.02408    0.00231   -0.02575
AFIX  43
H6B   2    0.924450    0.191672    0.492172    11.00000   -1.20000
AFIX   0
C24B  1    0.047983    0.452216    0.936175    11.00000    0.08037    0.07541 =
         0.04963   -0.01140    0.00741   -0.03420
AFIX  43
H24B  2    0.045989    0.505622    0.931648    11.00000   -1.20000
AFIX   0
PART 1
C28B  1   -0.107952    0.470146    0.930980    61.00000    0.05493    0.05995 =
         0.02602   -0.01282    0.00537   -0.01703
N8B   5   -0.275649    0.562674    0.898536    61.00000    0.06425    0.06159 =
         0.05904   -0.01261   -0.00135   -0.01630
PART 0
N4A   5    0.648599    0.399894    0.604898    11.00000    0.04685    0.19782 =
         0.11618   -0.09499    0.02105   -0.04153
N2C   5    0.665274    0.350711    0.383785    11.00000    0.10756
C7A   1    0.801135    0.517124    0.583054    11.00000    0.04999    0.14708 =
         0.05361   -0.02237    0.00480   -0.01556
AFIX  43
H7A   2    0.774471    0.571289    0.581418    11.00000   -1.20000
AFIX   0
C2B   1    1.063563    0.077374    0.462611    11.00000    0.08357    0.08529 =
         0.05403   -0.02167    0.00752   -0.02016
AFIX  43
H2B   2    1.026063    0.124361    0.438269    11.00000   -1.20000
AFIX   0
PART 1
O1B   6    0.628523    0.278898    0.932957    31.00000    0.04982    0.11080 =
         0.05514   -0.03404    0.00238   -0.02853
PART 0
C23A  1    0.149463    0.103786    0.885330    11.00000    0.05071    0.10531 =
         0.07744   -0.03848   -0.00389   -0.01340
C22B  1    0.212682    0.384469    0.939346    11.00000    0.07921    0.11561 =
         0.05315   -0.02236    0.01192   -0.05132
AFIX  43
H22B  2    0.231318    0.429608    0.939077    11.00000   -1.20000
AFIX   0
C8A   1    0.759943    0.461241    0.587625    11.00000    0.04891    0.15132 =
         0.05827   -0.03611    0.00491   -0.02209
C7B   1    0.986809    0.096611    0.633990    11.00000    0.07087    0.10719 =
         0.05008   -0.01715    0.00654   -0.04325
AFIX  43
H7B   2    1.022122    0.056856    0.667005    11.00000   -1.20000
AFIX   0
PART 1
C15C  1    0.700506    0.097733    0.667646    21.00000    0.06191    0.11414 =
         0.08592   -0.04868    0.02391   -0.01318
AFIX  43
H15C  2    0.744377    0.076320    0.639024    21.00000   -1.20000
AFIX   0
PART 0
C23C  1    0.296064    0.156537    1.092145    11.00000    0.07364    0.11348 =
         0.05938   -0.01170   -0.00309   -0.04619
C25A  1    0.138496    0.060934    0.988945    11.00000    0.06203    0.07959 =
         0.07867   -0.02783   -0.01543   -0.01008
AFIX  43
H25A  2    0.137984    0.055505    1.035972    11.00000   -1.20000
AFIX   0
PART 1
C14A  1    0.419097    0.423934    0.573997    41.00000    0.05840    0.07088 =
         0.05676    0.00084   -0.00607   -0.01937
AFIX  43
H14A  2    0.379400    0.445833    0.536988    41.00000   -1.20000
AFIX   0
PART 0
C8B   1    0.915822    0.154384    0.643323    11.00000    0.06494    0.12625 =
         0.05533   -0.03074    0.00804   -0.04842
C2A   1    1.043363    0.468922    0.584192    11.00000    0.05779    0.12296 =
         0.04497   -0.00869    0.00257   -0.02235
AFIX  43
H2A   2    1.057397    0.413725    0.589375    11.00000   -1.20000
AFIX   0
PART 1
C14C  1    0.685045    0.053088    0.726297    21.00000    0.04188    0.10013 =
         0.08420   -0.04867    0.00818   -0.01525
AFIX  43
H14C  2    0.720071    0.001071    0.741442    21.00000   -1.20000
AFIX   0
PART 0
C3A   1    0.957892    0.515135    0.579439    11.00000    0.05359    0.12892 =
         0.04078   -0.01101    0.00157   -0.02156
C1A   1    1.108116    0.506789    0.581054    11.00000    0.05578    0.13394 =
         0.04611    0.00193   -0.00543   -0.02640
AFIX  43
H1A   2    1.166775    0.475234    0.583027    11.00000   -1.20000
AFIX   0
PART 1
N8A   5    0.068232   -0.203238    1.043258    71.00000    0.08134    0.08422 =
         0.08319   -0.03216   -0.01822   -0.01858
PART 0
C22A  1    0.170572    0.157514    0.830451    11.00000    0.05506    0.13398 =
         0.06954   -0.03882    0.00070   -0.02093
AFIX  43
H22A  2    0.164898    0.150763    0.786015    11.00000   -1.20000
AFIX   0
C25C  1    0.165852    0.220057    1.115748    11.00000    0.08949    0.07750 =
         0.06158   -0.01618    0.00605   -0.04227
AFIX  43
H25C  2    0.106363    0.249677    1.112186    11.00000   -1.20000
AFIX   0
PART 1
C19A  1    0.216926    0.256885    0.782403    41.00000    0.05723    0.13524 =
         0.05167   -0.02255   -0.00788   -0.03615
C15A  1    0.504284    0.421799    0.567844    41.00000    0.05730    0.08665 =
         0.05160   -0.00629   -0.00202   -0.02623
AFIX  43
H15A  2    0.523408    0.443218    0.526405    41.00000   -1.20000
AFIX   0
PART 0
C9A   1    0.668440    0.464649    0.596134    11.00000    0.05044    0.17614 =
         0.05760   -0.03924    0.00835   -0.02942
PART 1
C28A  1    0.100311   -0.061482    0.985830    71.00000    0.04540    0.07333 =
         0.10558   -0.03399   -0.01479   -0.00450
PART 0
C6A   1    0.896529    0.403210    0.584934    11.00000    0.05115    0.14029 =
         0.04688   -0.03154    0.00414   -0.02629
AFIX  43
H6A   2    0.950341    0.364087    0.584791    11.00000   -1.20000
AFIX   0
C4B   1    1.115950   -0.008796    0.564527    11.00000    0.08186    0.09182 =
         0.06952   -0.01224    0.00021   -0.02172
AFIX  43
H4B   2    1.115366   -0.022663    0.611547    11.00000   -1.20000
AFIX   0
C24A  1    0.127836    0.037113    0.888436    11.00000    0.05906    0.11645 =
         0.08130   -0.04163   -0.00534   -0.01990
AFIX  43
H24A  2    0.118924    0.014142    0.852082    11.00000   -1.20000
AFIX   0
C9B   1    0.871658    0.173698    0.704072    11.00000    0.07620    0.15294 =
         0.05849   -0.04413    0.01758   -0.06471
AFIX  43
H9B   2    0.892831    0.142293    0.746107    11.00000   -1.20000
AFIX   0
PART 1
C20A  1    0.186560    0.336986    0.777332    41.00000    0.05575    0.13949 =
         0.03970   -0.02109    0.00483   -0.03991
AFIX  43
H20A  2    0.145571    0.358708    0.807726    41.00000   -1.20000
AFIX   0
PART 0
C24C  1    0.296682    0.153275    1.158816    11.00000    0.09303    0.13325 =
         0.06252   -0.01128   -0.00200   -0.06201
AFIX  43
H24C  2    0.344789    0.128648    1.189157    11.00000   -1.20000
AFIX   0
PART 1
C27B  1   -0.123887    0.551015    0.917810    61.00000    0.06638    0.05604 =
         0.02844   -0.02183   -0.00146   -0.01942
AFIX  43
H27B  2   -0.079335    0.575506    0.919867    61.00000   -1.20000
AFIX   0
PART 0
C5A   1    1.011851    0.625595    0.571257    11.00000    0.07816    0.12880 =
         0.04965   -0.01247    0.00390   -0.02953
AFIX  43
H5A   2    0.999935    0.680530    0.567122    11.00000   -1.20000
AFIX   0
C4A   1    0.941734    0.595117    0.572409    11.00000    0.06361    0.13870 =
         0.04651   -0.01378    0.00263   -0.02334
AFIX  43
H4A   2    0.883825    0.628514    0.568449    11.00000   -1.20000
AFIX   0
PART 1
C10B  1    0.767816    0.230458    0.766017    31.00000    0.04569    0.08949 =
         0.05360   -0.02484    0.00433   -0.02570
PART 0
C6C   1    0.723701    0.356473    0.429316    11.00000    0.08747
AFIX  43
H6C   2    0.762360    0.387795    0.420489    11.00000   -1.20000
AFIX   0
C8C   1    0.655245    0.276456    0.480225    11.00000    0.09125
PART 1
C18B  1    0.406339    0.288926    0.882294    31.00000    0.07032    0.10571 =
         0.05010   -0.00287   -0.00783   -0.03635
AFIX  43
H18B  2    0.375218    0.285782    0.844432    31.00000   -1.20000
AFIX   0
C29B  1   -0.174800    0.436257    0.927451    61.00000    0.05067    0.04898 =
         0.05933   -0.01253    0.00221   -0.00640
AFIX  43
H29B  2   -0.163595    0.381120    0.935577    61.00000   -1.20000
AFIX   0
PART 0
C1B   1    1.123531    0.025382    0.430767    11.00000    0.08596    0.09618 =
         0.06874   -0.02794    0.01095   -0.01916
AFIX  43
H1B   2    1.126516    0.038312    0.383841    11.00000   -1.20000
AFIX   0
C28C  1    0.185484    0.203675    1.238736    11.00000    0.13946    0.09277 =
         0.05792   -0.01687    0.01767   -0.06698
PART 1
C21A  1    0.216249    0.385923    0.727446    41.00000    0.04593    0.12953 =
         0.04352   -0.01503   -0.00110   -0.02845
AFIX  43
H21A  2    0.196139    0.441158    0.722540    41.00000   -1.20000
AFIX   0
C10C  1    0.649864    0.174911    0.651870    21.00000    0.05134    0.12975 =
         0.05743   -0.04651   -0.01238    0.00071
C29A  1    0.096893   -0.082897    1.053539    71.00000    0.06871    0.09632 =
         0.10314   -0.04283    0.00398   -0.03984
AFIX  43
H29A  2    0.104405   -0.049409    1.082052    71.00000   -1.20000
AFIX   0
C19B  1    0.362823    0.300856    0.940201    31.00000    0.05454    0.06938 =
         0.06060   -0.00454   -0.00363   -0.02330
PART 0
C22C  1    0.361656    0.125158    1.048715    11.00000    0.06031    0.14014 =
         0.07439    0.01260   -0.00830   -0.03649
AFIX  43
H22C  2    0.418695    0.097306    1.065978    11.00000   -1.20000
AFIX   0
C9C   1    0.631854    0.226195    0.535106    11.00000    0.09091
AFIX  43
H9C   2    0.590973    0.198855    0.529471    11.00000   -1.20000
AFIX   0
N8C   5    0.129039    0.229770    1.364025    11.00000    0.21525    0.14115 =
         0.06272   -0.02433    0.02628   -0.08886
C5B   1    1.173855   -0.056687    0.527817    11.00000    0.08631    0.08855 =
         0.09237   -0.02088   -0.00135   -0.00972
AFIX  43
H5B   2    1.213428   -0.103023    0.551315    11.00000   -1.20000
AFIX   0
PART 1
C16C  1    0.541496    0.065442    0.862144    21.00000    0.06186    0.08654 =
         0.04763   -0.02023    0.00264   -0.00726
C30A  1    0.082484   -0.153320    1.079619    71.00000    0.07028    0.09106 =
         0.09869   -0.03629   -0.01083   -0.03652
AFIX  43
H30A  2    0.082616   -0.167680    1.126637    71.00000   -1.20000
AFIX   0
C16A  1    0.276619    0.349700    0.685434    41.00000    0.03829    0.11191 =
         0.05121   -0.00587   -0.00233   -0.01844
C18A  1    0.276978    0.219618    0.740525    41.00000    0.04706    0.11136 =
         0.06566   -0.02181   -0.00712   -0.03059
AFIX  43
H18A  2    0.297721    0.164366    0.745909    41.00000   -1.20000
AFIX   0
C11B  1    0.755934    0.168800    0.812372    31.00000    0.06026    0.07680 =
         0.05164   -0.02342    0.00448   -0.02608
AFIX  43
H11B  2    0.779092    0.116591    0.805727    31.00000   -1.20000
AFIX   0
C13A  1    0.390742    0.393829    0.634829    41.00000    0.04685    0.13103 =
         0.05607    0.01173   -0.00069   -0.01761
C15B  1    0.734331    0.308015    0.774243    31.00000    0.05586    0.08833 =
         0.05483   -0.01058    0.00322   -0.02442
AFIX  43
H15B  2    0.744086    0.349171    0.741964    31.00000   -1.20000
AFIX   0
C14B  1    0.686779    0.324553    0.829796    31.00000    0.04955    0.07932 =
         0.05089   -0.01598   -0.01106   -0.01404
AFIX  43
H14B  2    0.662972    0.376948    0.835786    31.00000   -1.20000
AFIX   0
C13B  1    0.674542    0.261787    0.877249    31.00000    0.05151    0.07591 =
         0.04742   -0.02474   -0.00294   -0.01586
PART 0
C29C  1    0.097838    0.237453    1.248558    11.00000    0.13415    0.15884 =
         0.07813   -0.05079    0.02458   -0.08890
AFIX  43
H29C  2    0.055859    0.251532    1.213005    11.00000   -1.20000
AFIX   0
PART 1
C10A  1    0.563908    0.388852    0.621073    41.00000    0.04516    0.06356 =
         0.06145    0.00115    0.00162   -0.00906
C17B  1    0.494012    0.281540    0.878674    31.00000    0.06842    0.09346 =
         0.04708   -0.00248    0.00102   -0.02818
AFIX  43
H17B  2    0.522696    0.274713    0.838264    31.00000   -1.20000
AFIX   0
C17A  1    0.304585    0.269216    0.690017    41.00000    0.04888    0.11733 =
         0.06289   -0.02276    0.00513   -0.01788
AFIX  43
H17A  2    0.343179    0.247560    0.658212    41.00000   -1.20000
AFIX   0
C12B  1    0.709215    0.184529    0.869280    31.00000    0.06122    0.08004 =
         0.05451   -0.02538    0.00934   -0.02746
AFIX  43
H12B  2    0.701279    0.142983    0.902050    31.00000   -1.20000
AFIX   0
C19C  1    0.415345    0.120751    0.944359    21.00000    0.05436    0.07673 =
         0.07152   -0.01816   -0.00063   -0.02106
C30B  1   -0.258768    0.485557    0.911638    61.00000    0.05536    0.06065 =
         0.05563   -0.01677   -0.01144   -0.01223
AFIX  43
H30B  2   -0.305274    0.463218    0.910210    61.00000   -1.20000
AFIX   0
O1C   6    0.606552    0.036594    0.818552    21.00000    0.06888    0.10265 =
         0.05646   -0.01512    0.00461    0.02308
C18C  1    0.499406    0.117470    0.960834    21.00000    0.06012    0.07970 =
         0.05513   -0.02034   -0.00460   -0.01796
AFIX  43
H18C  2    0.512764    0.133622    0.999914    21.00000   -1.20000
AFIX   0
C26B  1   -0.210174    0.593036    0.901417    61.00000    0.06402    0.05770 =
         0.04894   -0.01683   -0.00612   -0.01502
AFIX  43
H26B  2   -0.223372    0.648331    0.891405    61.00000   -1.20000
AFIX   0
PART 0
C30C  1    0.073790    0.249895    1.312128    11.00000    0.15301    0.15014 =
         0.08570   -0.05175    0.03302   -0.08967
AFIX  43
H30C  2    0.014306    0.274235    1.318779    11.00000   -1.20000
AFIX   0
PART 1
C16B  1    0.539499    0.284073    0.933417    31.00000    0.05690    0.07379 =
         0.05967   -0.01310    0.00425   -0.01778
C27A  1    0.084312   -0.113890    0.947595    71.00000    0.07454    0.08947 =
         0.07935   -0.02871   -0.00717   -0.02332
AFIX  43
H27A  2    0.084357   -0.101564    0.900458    71.00000   -1.20000
AFIX   0
C26A  1    0.068978   -0.181314    0.977654    71.00000    0.11652    0.08960 =
         0.08876   -0.02804   -0.01555   -0.03327
AFIX  43
H26A  2    0.058159   -0.214807    0.950404    71.00000   -1.20000
AFIX   0
PART 0
C7C   1    0.620826    0.302199    0.416419    11.00000    0.11994
AFIX  43
H7C   2    0.574452    0.288647    0.398321    11.00000   -1.20000
AFIX   0
C27C  1    0.246001    0.182499    1.291917    11.00000    0.16391    0.15742 =
         0.06598   -0.02122   -0.00029   -0.06303
AFIX  43
H27C  2    0.306105    0.159044    1.286699    11.00000   -1.20000
AFIX   0
PART 1
C20B  1    0.411122    0.297598    0.995237    31.00000    0.05610    0.10343 =
         0.06375   -0.03977    0.00680   -0.02103
AFIX  43
H20B  2    0.384184    0.298401    1.036925    31.00000   -1.20000
AFIX   0
C17C  1    0.563694    0.089480    0.917715    21.00000    0.05979    0.07223 =
         0.05379   -0.01430   -0.00514   -0.00750
AFIX  43
H17C  2    0.622419    0.086938    0.926463    21.00000   -1.20000
AFIX   0
C13C  1    0.615280    0.088663    0.761878    21.00000    0.05546    0.10202 =
         0.04772   -0.02479    0.00122   -0.00348
C21B  1    0.498290    0.293159    0.991694    31.00000    0.05866    0.10546 =
         0.05969   -0.03418    0.00877   -0.02941
AFIX  43
H21B  2    0.529437    0.296396    1.029506    31.00000   -1.20000
AFIX   0
C20C  1    0.392222    0.095559    0.888941    21.00000    0.05972    0.07191 =
         0.08747   -0.02899   -0.00974   -0.00488
AFIX  43
H20C  2    0.333559    0.097658    0.880497    21.00000   -1.20000
AFIX   0
C11C  1    0.581356    0.210278    0.687075    21.00000    0.06636    0.10504 =
         0.05379   -0.01844    0.00397   -0.00033
AFIX  43
H11C  2    0.548057    0.263102    0.673047    21.00000   -1.20000
AFIX   0
C21C  1    0.456945    0.067305    0.846330    21.00000    0.06870    0.10788 =
         0.06776   -0.03581   -0.01347   -0.00749
AFIX  43
H21C  2    0.443970    0.049894    0.807808    21.00000   -1.20000
AFIX   0
C12C  1    0.563816    0.164637    0.743889    21.00000    0.05782    0.10530 =
         0.06023   -0.01821    0.00016    0.00465
AFIX  43
H12C  2    0.516813    0.185170    0.770448    21.00000   -1.20000
AFIX   0
C11A  1    0.534781    0.359584    0.681331    41.00000    0.05054    0.12960 =
         0.04637   -0.00406   -0.00242   -0.02111
AFIX  43
H11A  2    0.574650    0.337743    0.718240    41.00000   -1.20000
AFIX   0
C12A  1    0.447883    0.361540    0.688920    41.00000    0.05195    0.15339 =
         0.05537    0.00334   -0.00114   -0.02885
AFIX  43
H12A  2    0.428274    0.341061    0.730500    41.00000   -1.20000
AFIX   0
PART 0
C26C  1    0.212877    0.197873    1.353415    11.00000    0.20895    0.18191 =
         0.05889   -0.01042    0.00589   -0.06446
AFIX  43
H26C  2    0.252915    0.184664    1.390179    11.00000   -1.20000
AFIX   0

CL2G  3    0.921332   -0.045227    0.804567    11.00000    0.07623    0.09601 =
         0.08328   -0.03278   -0.00999   -0.02457
CL1G  3    0.385674    0.282215    0.452240    11.00000    0.14064    0.14381 =
         0.08874   -0.00323   -0.03017   -0.04774
O7G   6    0.893251   -0.034636    0.736930    11.00000    0.07482    0.11895 =
         0.07476   -0.02690   -0.00638   -0.02521
O8G   6    0.970003   -0.124779    0.828769    11.00000    0.12597    0.10347 =
         0.10121   -0.00615   -0.04085   -0.03725
O6G   6    0.845865   -0.029101    0.844823    11.00000    0.09701    0.21021 =
         0.09944   -0.08059    0.01429   -0.05460
O5G   6    0.972405    0.007765    0.810923    11.00000    0.08673    0.10597 =
         0.14614   -0.03423   -0.03479   -0.02960
O2G   6    0.407466    0.353599    0.432487    11.00000    0.16383    0.15934 =
         0.11020    0.00913   -0.01756   -0.06243
O1G   6    0.294698    0.296308    0.445389    11.00000    0.10060    0.17825 =
         0.11350   -0.00495   -0.01787   -0.03617
O4G   6    0.413387    0.247912    0.518198    11.00000    0.22456    0.23062 =
         0.11881    0.06185   -0.08083   -0.12170
O3G   6    0.429536    0.231183    0.407667    11.00000    0.18501    0.20424 =
         0.20367   -0.08504    0.01603   -0.01938
PART 2
C10F  1    0.637648    0.161747    0.640770   -21.00000    0.04602    0.14165 =
         0.03407   -0.03509   -0.00380   -0.01734
C11F  1    0.553311    0.167564    0.660519   -21.00000    0.05193    0.10134 =
         0.09663   -0.00957    0.01488   -0.00709
AFIX  43
H11F  2    0.508745    0.211016    0.638202   -21.00000   -1.20000
AFIX   0
C15F  1    0.698465    0.096064    0.676348   -21.00000    0.04715    0.08375 =
         0.08622   -0.04893   -0.00161   -0.02423
AFIX  43
H15F  2    0.758142    0.087728    0.666522   -21.00000   -1.20000
AFIX   0
C12F  1    0.528222    0.116415    0.709286   -21.00000    0.05958    0.10102 =
         0.11705   -0.00150    0.02281   -0.01111
AFIX  43
H12F  2    0.468505    0.124813    0.718997   -21.00000   -1.20000
AFIX   0
C14F  1    0.675361    0.042264    0.725617   -21.00000    0.05722    0.09515 =
         0.07463   -0.03847   -0.00531   -0.02336
AFIX  43
H14F  2    0.719195   -0.002529    0.746861   -21.00000   -1.20000
AFIX   0
C13F  1    0.590239    0.052471    0.744333   -21.00000    0.06508    0.07171 =
         0.09106   -0.02495    0.01047   -0.01976
O1F   6    0.567935   -0.003231    0.792140   -21.00000    0.08569    0.07949 =
         0.09519   -0.01851    0.03354   -0.02547
C16F  1    0.515185    0.028354    0.842690   -21.00000    0.06533    0.06526 =
         0.10007   -0.01417    0.01635   -0.00744
C21F  1    0.434729    0.013000    0.849931   -21.00000    0.05219    0.07917 =
         0.06228   -0.00604   -0.00539   -0.00190
AFIX  43
H21F  2    0.416980   -0.017302    0.822812   -21.00000   -1.20000
AFIX   0
C20F  1    0.381365    0.044299    0.898994   -21.00000    0.04903    0.07880 =
         0.06210   -0.00884   -0.00883   -0.00627
AFIX  43
H20F  2    0.326493    0.034308    0.904559   -21.00000   -1.20000
AFIX   0
C19F  1    0.403854    0.088906    0.939829   -21.00000    0.04190    0.06501 =
         0.05689    0.00686   -0.00341   -0.01077
C18F  1    0.485807    0.099837    0.932726   -21.00000    0.05450    0.08166 =
         0.09669   -0.02173    0.00590   -0.02005
AFIX  43
H18F  2    0.504109    0.128496    0.961122   -21.00000   -1.20000
AFIX   0
C17F  1    0.541950    0.070001    0.885178   -21.00000    0.05285    0.08086 =
         0.12017   -0.02564    0.02213   -0.01409
AFIX  43
H17F  2    0.597993    0.077826    0.881573   -21.00000   -1.20000
AFIX   0
O1E   6    0.612787    0.329522    0.916105   -31.00000    0.05828    0.11680 =
         0.06923   -0.04503    0.01689   -0.03173
C13E  1    0.659685    0.306630    0.862556   -31.00000    0.05849    0.09288 =
         0.05905   -0.02829    0.00673   -0.03245
C14E  1    0.674154    0.364625    0.811928   -31.00000    0.06854    0.08763 =
         0.06166   -0.02576    0.00821   -0.01874
AFIX  43
H14E  2    0.651019    0.418239    0.814448   -31.00000   -1.20000
AFIX   0
C15E  1    0.723086    0.342643    0.757604   -31.00000    0.06684    0.09725 =
         0.06523   -0.02941    0.01326   -0.02668
AFIX  43
H15E  2    0.734329    0.381074    0.723234   -31.00000   -1.20000
AFIX   0
C10E  1    0.755023    0.263559    0.754734   -31.00000    0.05384    0.09827 =
         0.05442   -0.02639    0.01078   -0.02639
C11E  1    0.739230    0.206980    0.805181   -31.00000    0.06202    0.08810 =
         0.05977   -0.02626   -0.00044   -0.02159
AFIX  43
H11E  2    0.760333    0.153454    0.801845   -31.00000   -1.20000
AFIX   0
C12E  1    0.693009    0.227643    0.860403   -31.00000    0.06829    0.09175 =
         0.06766   -0.03338    0.01514   -0.03719
AFIX  43
H12E  2    0.684430    0.188868    0.895694   -31.00000   -1.20000
AFIX   0
C16E  1    0.526269    0.326109    0.917780   -31.00000    0.06401    0.10229 =
         0.05598   -0.02412    0.01393   -0.03779
C17E  1    0.482811    0.313273    0.866964   -31.00000    0.06081    0.09286 =
         0.04909   -0.01597    0.01106   -0.03170
AFIX  43
H17E  2    0.511577    0.304005    0.827013   -31.00000   -1.20000
AFIX   0
C18E  1    0.397407    0.313597    0.872937   -31.00000    0.05872    0.11755 =
         0.04900   -0.01058    0.00883   -0.03494
AFIX  43
H18E  2    0.368646    0.300994    0.838306   -31.00000   -1.20000
AFIX   0
C19E  1    0.352971    0.332098    0.928890   -31.00000    0.06041    0.07656 =
         0.05097   -0.00945    0.00969   -0.03061
C20E  1    0.396287    0.349178    0.977983   -31.00000    0.07193    0.13417 =
         0.05866   -0.03527    0.01299   -0.04341
AFIX  43
H20E  2    0.366683    0.362685    1.016623   -31.00000   -1.20000
AFIX   0
C21E  1    0.482356    0.347077    0.972211   -31.00000    0.07936    0.13887 =
         0.06150   -0.04323    0.01701   -0.05075
AFIX  43
H21E  2    0.511350    0.360311    1.006343   -31.00000   -1.20000
AFIX   0
C16D  1    0.273927    0.380927    0.693098   -41.00000    0.05341    0.11986 =
         0.06353   -0.01300   -0.00591   -0.01504
C21D  1    0.210848    0.405553    0.738168   -41.00000    0.05989    0.13050 =
         0.05825   -0.02858    0.00529   -0.02988
AFIX  43
H21D  2    0.183605    0.459690    0.736179   -41.00000   -1.20000
AFIX   0
C20D  1    0.187306    0.349593    0.787119   -41.00000    0.05814    0.12042 =
         0.06425   -0.03455   -0.00544   -0.03591
AFIX  43
H20D  2    0.144931    0.367436    0.818067   -41.00000   -1.20000
AFIX   0
C19D  1    0.224022    0.269283    0.791569   -41.00000    0.03828    0.12611 =
         0.04559   -0.02779   -0.01245   -0.02054
C18D  1    0.286984    0.245959    0.745161   -41.00000    0.05361    0.10504 =
         0.07706   -0.03534    0.00592   -0.02830
AFIX  43
H18D  2    0.313738    0.191890    0.746362   -41.00000   -1.20000
AFIX   0
C17D  1    0.311183    0.301205    0.696902   -41.00000    0.04713    0.12913 =
         0.06000   -0.01981    0.00512   -0.01635
AFIX  43
H17D  2    0.354011    0.283591    0.666186   -41.00000   -1.20000
AFIX   0
O1D   6    0.296025    0.433064    0.642988   -41.00000    0.04816    0.10233 =
         0.06282    0.01044    0.00495   -0.01213
C13D  1    0.384451    0.422849    0.630949   -41.00000    0.04046    0.11704 =
         0.07770    0.00978    0.00071   -0.00607
C12D  1    0.435637    0.437008    0.677871   -41.00000    0.05202    0.13865 =
         0.07450   -0.01420    0.01375   -0.00278
AFIX  43
H12D  2    0.411678    0.447865    0.719029   -41.00000   -1.20000
AFIX   0
C11D  1    0.520393    0.435681    0.666135   -41.00000    0.04823    0.14270 =
         0.08035   -0.03357    0.00741   -0.01325
AFIX  43
H11D  2    0.555149    0.444775    0.699059   -41.00000   -1.20000
AFIX   0
C10D  1    0.554562    0.420968    0.605902   -41.00000    0.05164    0.07557 =
         0.06489   -0.00270    0.00417   -0.00438
C15D  1    0.504545    0.405937    0.559495   -41.00000    0.04530    0.08478 =
         0.05462   -0.00041    0.00722   -0.01026
AFIX  43
H15D  2    0.529036    0.394511    0.518632   -41.00000   -1.20000
AFIX   0
C14D  1    0.419227    0.407062    0.570935   -41.00000    0.04604    0.08421 =
         0.07361    0.01559   -0.00456   -0.01311
AFIX  43
H14D  2    0.384937    0.397162    0.538152   -41.00000   -1.20000
AFIX   0

PART 0
O1ET  6   -0.029429    0.423948    0.787149    11.00000    0.15382
C1ET  1   -0.028725    0.295700    0.787861    11.00000    0.14349
C2ET  1   -0.066312    0.376168    0.759931    11.00000    0.14969
C3ET  1   -0.040781    0.506024    0.756555    11.00000    0.17102
C4ET  1   -0.128670    0.553237    0.739160    11.00000    0.24416

PART 1
C3C   1    0.646829    0.408520    0.325103    51.00000    0.07641
C4C   1    0.561071    0.440591    0.301653    51.00000    0.09322
AFIX  43
H4C   2    0.514195    0.430935    0.327465    51.00000   -1.20000
AFIX   0
C2C   1    0.715813    0.422473    0.287027    51.00000    0.09335
AFIX  43
H2C   2    0.774717    0.400801    0.302402    51.00000   -1.20000
AFIX   0
C1C   1    0.692349    0.470080    0.225330    51.00000    0.11071
AFIX  43
H1C   2    0.737273    0.481220    0.197903    51.00000   -1.20000
AFIX   0
C5C   1    0.547038    0.486971    0.239369    51.00000    0.12056
AFIX  43
H5C   2    0.488978    0.509860    0.222302    51.00000   -1.20000
AFIX   0
N1C   5    0.611239    0.500881    0.202402    51.00000    0.12866
PART 2
C3F   1    0.649653    0.370486    0.310497   -51.00000    0.08646
C4F   1    0.565371    0.388439    0.284890   -51.00000    0.10974
AFIX  43
H4F   2    0.520807    0.376263    0.312175   -51.00000   -1.20000
AFIX   0
C2F   1    0.709339    0.394772    0.268178   -51.00000    0.12765
AFIX  43
H2F   2    0.767364    0.386993    0.283149   -51.00000   -1.20000
AFIX   0
C1F   1    0.681404    0.430841    0.203186   -51.00000    0.13050
AFIX  43
H1F   2    0.722995    0.446357    0.174472   -51.00000   -1.20000
AFIX   0
C5F   1    0.547122    0.424655    0.218437   -51.00000    0.11889
AFIX  43
H5F   2    0.489506    0.435004    0.201403   -51.00000   -1.20000
AFIX   0
N1F   5    0.603344    0.445105    0.178430   -51.00000    0.13956
C28E  1   -0.113042    0.460046    0.928066   -61.00000    0.08473    0.07234 =
         0.06384   -0.03009   -0.01151   -0.00406
N8E   5   -0.292511    0.537589    0.915434   -61.00000    0.09364    0.09470 =
         0.07849   -0.03873   -0.02616    0.01935
C27E  1   -0.143221    0.541454    0.907694   -61.00000    0.12130    0.07367 =
         0.05012   -0.02378   -0.01595   -0.01343
AFIX  43
H27E  2   -0.104178    0.572241    0.897566   -61.00000   -1.20000
AFIX   0
C29E  1   -0.173958    0.418076    0.942424   -61.00000    0.07408    0.08794 =
         0.09985   -0.02721   -0.02445   -0.00418
AFIX  43
H29E  2   -0.156518    0.363020    0.956824   -61.00000   -1.20000
AFIX   0
C30E  1   -0.261999    0.461161    0.934543   -61.00000    0.07995    0.10142 =
         0.11521   -0.03746   -0.02439    0.00748
AFIX  43
H30E  2   -0.303471    0.432739    0.943807   -61.00000   -1.20000
AFIX   0
C26E  1   -0.233631    0.575298    0.902966   -61.00000    0.12676    0.08331 =
         0.06599   -0.02736   -0.01419    0.01201
AFIX  43
H26E  2   -0.254099    0.630417    0.889548   -61.00000   -1.20000
AFIX   0
N8D   5    0.091032   -0.206689    1.013408   -71.00000    0.07996    0.06378 =
         0.06397   -0.02268    0.01116   -0.02363
C28D  1    0.119787   -0.068273    0.976642   -71.00000    0.04540    0.07333 =
         0.10558   -0.03399   -0.01479   -0.00450
C29D  1    0.099377   -0.089623    1.041625   -71.00000    0.10262    0.08719 =
         0.10085   -0.04997   -0.00320   -0.02935
AFIX  43
H29D  2    0.095251   -0.056630    1.073238   -71.00000   -1.20000
AFIX   0
C30D  1    0.085406   -0.161504    1.057748   -71.00000    0.07051    0.07756 =
         0.09169   -0.04314   -0.01016   -0.01157
AFIX  43
H30D  2    0.071305   -0.179260    1.101996   -71.00000   -1.20000
AFIX   0
C27D  1    0.125207   -0.113154    0.927889   -71.00000    0.03580    0.07109 =
         0.07472   -0.01581    0.01532   -0.02197
AFIX  43
H27D  2    0.137185   -0.096408    0.882876   -71.00000   -1.20000
AFIX   0
C26D  1    0.111593   -0.183514    0.951276   -71.00000    0.06695    0.07231 =
         0.07554   -0.02073    0.02915   -0.02534
AFIX  43
H26D  2    0.117125   -0.218556    0.921242   -71.00000   -1.20000
AFIX   6

PART 1
CL4G  3    0.116303    0.636972    0.871901    91.00000    0.09866    0.09519 =
         0.07121   -0.02039    0.01514   -0.05030
O15G  6    0.157999    0.692603    0.887273    91.00000    0.14759    0.11075 =
         0.10337   -0.02774    0.01292   -0.06973
O14G  6    0.170842    0.558792    0.896106    91.00000    0.10760    0.07711 =
         0.11346   -0.00157    0.03006   -0.03176
O13G  6    0.033579    0.648123    0.903255    91.00000    0.09217    0.08842 =
         0.09517   -0.02346    0.01694   -0.03315
O16G  6    0.103002    0.648418    0.800880    91.00000    0.12334    0.14489 =
         0.06891   -0.01578    0.00840   -0.07120
AFIX   6

CL3G  3    0.248101   -0.012198    0.728258    81.00000    0.09503
O10G  6    0.302196    0.039729    0.718042    81.00000    0.17718
O11G  6    0.269184   -0.062442    0.792466    81.00000    0.13053
O9G   6    0.157916    0.032987    0.725244    81.00000    0.13489
O12G  6    0.263017   -0.059036    0.677132    81.00000    0.13911
AFIX   6

PART 2
CL3H  3    0.249428    0.018568    0.716905   -81.00000    0.07107
O10H  6    0.304378    0.050119    0.751585   -81.00000    0.08013
O11H  6    0.235401   -0.049149    0.759302   -81.00000    0.14152
O9H   6    0.167073    0.076754    0.699175   -81.00000    0.08443
O12H  6    0.290932   -0.003490    0.657520   -81.00000    0.11153
AFIX   6

CL4H  3    0.081498    0.630106    0.856767   -91.00000    0.09721    0.07845 =
         0.08255   -0.00504    0.00486   -0.04029
O15H  6    0.097839    0.703950    0.831783   -91.00000    0.17310    0.07357 =
         0.19731    0.03372    0.06716   -0.04608
O14H  6    0.136274    0.590845    0.915099   -91.00000    0.13659    0.10860 =
         0.05940    0.00790    0.00033   -0.02498
O13H  6   -0.008531    0.643262    0.873730   -91.00000    0.09898    0.06818 =
         0.11132   -0.01680    0.02790   -0.02302
O16H  6    0.100231    0.582267    0.806349   -91.00000    0.12828    0.15646 =
         0.08071   -0.04070    0.02476   -0.05055
AFIX   0

PART 0
N1S2  5    0.125815    0.778144    0.625591    11.00000    0.10694    0.10153 =
         0.07095   -0.01375    0.00080   -0.02627
C1S2  1    0.137706    0.793886    0.673272    11.00000    0.12448    0.10013 =
         0.06485   -0.00975    0.00891   -0.05463
C2S2  1    0.157064    0.816195    0.736348    11.00000    0.33391    0.17859 =
         0.06787   -0.00723   -0.01586   -0.15886
AFIX 137
H2SA  2    0.186339    0.857245    0.726597    11.00000   -1.50000
H2SB  2    0.194939    0.770482    0.765503    11.00000   -1.50000
H2SC  2    0.102671    0.835561    0.758512    11.00000   -1.50000
AFIX   6

PART -1
C1EV  1    0.640652   -0.015345    0.524344    10.50000    0.14332
C2EV  1    0.552993    0.046238    0.511053    10.50000    0.25218
O1EV  6    0.490960    0.010970    0.492491    10.50000    0.12671
C3EV  1    0.406330    0.063647    0.478849    10.50000    0.17487
C4EV  1    0.345866    0.019712    0.459616    10.50000    0.28767
AFIX   0

PART 0
C1S1  1    0.141795    0.224888    0.576214    11.00000    0.08561    0.14513 =
         0.08747   -0.00631   -0.00127   -0.05708
N1S1  5    0.081368    0.265693    0.590323    11.00000    0.07463    0.14113 =
         0.16949    0.00400   -0.00457   -0.02822
C2S1  1    0.219426    0.169414    0.557583    11.00000    0.12365    0.16852 =
         0.14822   -0.07897    0.05596   -0.07336
AFIX 137
H2SD  2    0.204775    0.147459    0.520613    11.00000   -1.50000
H2SE  2    0.242041    0.127284    0.595702    11.00000   -1.50000
H2SF  2    0.263689    0.196178    0.543900    11.00000   -1.50000
AFIX   0

PART 1
N1S4  5    0.312930   -0.120148    0.972774   101.00000    0.08364    0.20639 =
         0.07587   -0.00257   -0.01570   -0.03960
C1S4  1    0.310992   -0.164169    0.938194   101.00000    0.08352    0.19714 =
         0.09922   -0.00942   -0.00653   -0.05361
C2S4  1    0.312351   -0.220273    0.894930   101.00000    0.17531    0.23302 =
         0.17144   -0.05233   -0.03261   -0.04577
AFIX 137
H2SG  2    0.300165   -0.266712    0.920960   101.00000   -1.50000
H2SH  2    0.369779   -0.235329    0.875769   101.00000   -1.50000
H2SI  2    0.268017   -0.196304    0.859124   101.00000   -1.50000
AFIX   0

C1S5  1    0.502265    0.004228    0.677575    10.50000    0.09055
N1S5  5    0.531283   -0.049555    0.717942    10.50000    0.10722
C2S5  1    0.461967    0.075637    0.633342    10.50000    0.10006
AFIX 137
H2SJ  2    0.473973    0.068858    0.587379    10.50000   -1.50000
H2SK  2    0.485225    0.116900    0.643034    10.50000   -1.50000
H2SL  2    0.399025    0.090196    0.639235    10.50000   -1.50000
AFIX   0

PART 2
C1T4  1    0.354965   -0.080727    0.940341  -101.00000    0.07567    0.09130 =
         0.06920    0.00735   -0.01290   -0.02550
N1T4  5    0.321733   -0.056739    0.987040  -101.00000    0.06235    0.08795 =
         0.08084    0.01326    0.00119   -0.01903
C2T4  1    0.395337   -0.109343    0.881895  -101.00000    0.07914    0.11515 =
         0.07115   -0.01226   -0.01348   -0.03147
AFIX 137
H2TA  2    0.457859   -0.133165    0.891118  -101.00000   -1.50000
H2TB  2    0.386055   -0.065696    0.844169  -101.00000   -1.50000
H2TC  2    0.369209   -0.148383    0.871152  -101.00000   -1.50000
AFIX   6

PART 1
N1S3  5    0.669252    0.529207    0.732041   111.00000    0.10910
C1S3  1    0.688914    0.586381    0.729545   111.00000    0.08586
C2S3  1    0.713444    0.657891    0.726449   111.00000    0.14856
AFIX   6

PART 2
N1T3  5    0.665217    0.502496    0.735699  -111.00000    0.13663
C1T3  1    0.654701    0.568434    0.735702  -111.00000    0.10121
C2T3  1    0.641553    0.650864    0.735773  -111.00000    0.20131
AFIX   0
HKLF 4


REM  mn_a.res in P-1
REM wR2 = 0.3776, GooF = S = 1.671, Restrained GooF = 1.654 for all data
REM R1 = 0.1100 for 14564 Fo > 4sig(Fo) and 0.1257 for all 18961 data
REM 1862 parameters refined using 1480 restraints

END

WGHT      0.2000      0.0000

REM Highest difference peak  1.318,  deepest hole -0.963,  1-sigma level  0.097
Q1    1   0.3225 -0.2631  0.8525  11.00000  0.05    1.32
Q2    1   0.3164 -0.3031  0.8937  11.00000  0.05    1.30
Q3    1  -0.0851  0.4614  0.7527  11.00000  0.05    1.09
Q4    1  -0.0049  0.5400  0.7583  11.00000  0.05    1.07
Q5    1  -0.1625  0.4795  0.7443  11.00000  0.05    0.93
Q6    1   0.5280 -0.1184  0.7164  11.00000  0.05    0.77
Q7    1   0.5032 -0.1008  0.6980  11.00000  0.05    0.76
Q8    1  -0.0003  0.2868  0.7441  11.00000  0.05    0.75
Q9    1  -0.0383  0.4174  0.7442  11.00000  0.05    0.73
Q10   1   0.1568 -0.0160  0.7444  11.00000  0.05    0.71
Q11   1   0.3830  0.0245  0.4233  11.00000  0.05    0.69
Q12   1   0.6408  0.2586  0.4108  11.00000  0.05    0.61
Q13   1   0.6749  0.3180  0.3668  11.00000  0.05    0.60
Q14   1   0.6550  0.3785  0.3964  11.00000  0.05    0.60
Q15   1   0.2838  0.0075  0.7845  11.00000  0.05    0.58
Q16   1   0.5611 -0.0780  0.6871  11.00000  0.05    0.56
Q17   1   0.2791 -0.3404  0.9556  11.00000  0.05    0.54
Q18   1   0.5559  0.3536  0.2807  11.00000  0.05    0.53
Q19   1   0.5838  0.3754  0.1421  11.00000  0.05    0.52
Q20   1   0.5940  0.0779  0.4474  11.00000  0.05    0.52
Q21   1   0.5808  0.3554  0.1522  11.00000  0.05    0.51
Q22   1   0.5398  0.3847  0.2167  11.00000  0.05    0.51
Q23   1   0.2826 -0.0453  0.6717  11.00000  0.05    0.49
Q24   1   0.5992  0.3961  0.1710  11.00000  0.05    0.46
Q25   1   0.1888  0.1014  0.6815  11.00000  0.05    0.45
Q26   1   0.6208  0.5187  0.5981  11.00000  0.05    0.45
Q27   1  -0.2068  0.5635  0.7342  11.00000  0.05    0.42
Q28   1   0.6003  0.3343  0.4231  11.00000  0.05    0.38
Q29   1   0.5414  0.0216  0.5626  11.00000  0.05    0.37
Q30   1   0.6760  0.6575  0.7297  11.00000  0.05    0.36
Q31   1  -0.0492  0.3190  0.7977  11.00000  0.05    0.35
Q32   1   0.6728  0.2401  0.4727  11.00000  0.05    0.35
Q33   1   0.7564  0.3101  0.5838  11.00000  0.05    0.35
Q34   1   0.1751  0.0509  0.6994  11.00000  0.05    0.35
Q35   1   0.6828  0.2583  0.4640  11.00000  0.05    0.34
Q36   1   0.4630 -0.0385  0.6229  11.00000  0.05    0.34
Q37   1   0.4775  0.2422  0.5076  11.00000  0.05    0.33
Q38   1   0.2748 -0.0955  0.6999  11.00000  0.05    0.33
Q39   1   0.3344  0.0168  0.6945  11.00000  0.05    0.33
Q40   1   0.3023  0.3185  0.5311  11.00000  0.05    0.33
Q41   1   0.4973 -0.1795  0.8773  11.00000  0.05    0.33
Q42   1  -0.0855  0.3565  0.7825  11.00000  0.05    0.32
Q43   1   0.6073  0.6438  0.7660  11.00000  0.05    0.32
Q44   1   0.7439  0.5827  0.7344  11.00000  0.05    0.31
Q45   1   0.6385  0.3367  0.3008  11.00000  0.05    0.31
Q46   1   0.6401  0.3027  0.4840  11.00000  0.05    0.31
Q47   1   0.4850 -0.1647  0.8600  11.00000  0.05    0.31
Q48   1   0.7587  0.6309  0.7172  11.00000  0.05    0.30
Q49   1   0.1367  0.5584  0.8377  11.00000  0.05    0.29
Q50   1   0.3944  0.0420  0.5232  11.00000  0.05    0.28
Q51   1   0.3271  0.0416  0.6895  11.00000  0.05    0.27
Q52   1   0.3541  0.2803  0.4935  11.00000  0.05    0.27
Q53   1   0.6240  0.7027  0.7872  11.00000  0.05    0.27
Q54   1   0.7298  0.6004  0.7280  11.00000  0.05    0.26
Q55   1  -0.0051  0.6170  0.8786  11.00000  0.05    0.26
Q56   1   1.0145 -0.0252  0.7774  11.00000  0.05    0.25
Q57   1   0.6969  0.3538  0.2612  11.00000  0.05    0.23
Q58   1   0.4444  0.0375  0.6314  11.00000  0.05    0.23
Q59   1   0.6318  0.5335  0.2044  11.00000  0.05    0.23
Q60   1   0.7217  0.4828  0.2373  11.00000  0.05    0.23
Q61   1   0.2156  0.1767  1.2865  11.00000  0.05    0.23
Q62   1   1.0140 -0.1057  0.7875  11.00000  0.05    0.22
Q63   1   0.7935  0.5366  0.5814  11.00000  0.05    0.22
Q64   1   0.2907  0.0373  0.6432  11.00000  0.05    0.22
Q65   1   0.4718  0.3431  0.4206  11.00000  0.05    0.21
Q66   1   0.6633  0.2114  0.5200  11.00000  0.05    0.21
Q67   1   0.4311  0.0958  0.3968  11.00000  0.05    0.21
Q68   1   0.0967  0.2200  1.3168  11.00000  0.05    0.21
Q69   1   0.6382  0.4650  0.1817  11.00000  0.05    0.21
Q70   1   0.6444  0.1989  0.5396  11.00000  0.05    0.21
Q71   1   0.6826  0.3834  0.1960  11.00000  0.05    0.21
Q72   1   0.3355  0.1597  0.9803  11.00000  0.05    0.21
Q73   1   0.0720  0.7127  0.8991  11.00000  0.05    0.21
Q74   1   0.3838  0.2058  0.4002  11.00000  0.05    0.20
Q75   1   0.6799  0.4820  0.5819  11.00000  0.05    0.20
Q76   1   0.4181  0.1938  0.4973  11.00000  0.05    0.20
Q77   1   0.0782  0.2635  0.6224  11.00000  0.05    0.20
Q78   1   0.8959  0.0595  0.8002  11.00000  0.05    0.20
Q79   1   0.2124  0.4075  0.9396  11.00000  0.05    0.20
Q80   1  -0.1029  0.3054  0.8367  11.00000  0.05    0.20
;
_shelx_res_checksum                76229
_shelx_hkl_file
;
   0   0  -1   56.27    1.55
   0   0  -1   55.76    1.55
   0   0   1   55.24    1.55
   0   0   1   55.31    1.55
   0   0   1   53.10    1.03
   0   0   1   55.98    1.03
   0   0  -2  487.10   12.85
   0   0  -2  472.92   12.55
   0   0   2  483.63   12.78
   0   0   2  471.22   12.48
   0   0  -3    2.07    0.37
   0   0  -3    1.85    0.44
   0   0   3    1.40    0.30
   0   0   3    1.55    0.44
   0   0  -3    1.99    0.37
   0   0  -3    1.62    0.30
   0   0   3    1.62    0.37
   0   0   3    1.70    0.30
   0   0  -4   20.31    0.89
   0   0  -4   20.97    1.03
   0   0   4   20.09    0.89
   0   0   4   21.71    1.03
   0   0  -4   19.27    0.66
   0   0  -4   19.13    0.74
   0   0   4   20.46    0.66
   0   0   4   19.64    0.74
   0   0  -5  125.98    3.69
   0   0  -5  129.01    3.84
   0   0   5  125.54    3.69
   0   0   5  131.01    3.91
   0   0  -5  131.74    2.73
   0   0  -5  131.45    2.66
   0   0   5  132.70    2.81
   0   0   5  126.50    2.58
   0   0  -6 6015.65  157.52
   0   0  -6 6213.56  162.76
   0   0   6 6198.79  162.32
   0   0   6 6136.76  160.77
   0   0  -6 6151.53  108.11
   0   0  -6 6285.93  110.55
   0   0   6 6045.92  106.27
   0   0   6 5897.49  103.76
   0   0  -7  381.79   10.49
   0   0  -7  394.13   10.93
   0   0   7  389.18   10.63
   0   0   7  384.45   10.71
   0   0  -7  399.74    7.53
   0   0  -7  414.36    7.83
   0   0   7  396.93    7.46
   0   0   7  388.51    7.38
   0   0  -8 2047.06   54.06
   0   0  -8 2063.31   54.65
   0   0   8 2065.52   54.50
   0   0   8 2006.45   53.17
   0   0  -8 2074.39   37.00
   0   0  -8 2047.06   36.41
   0   0   8 2061.09   36.78
   0   0   8 2117.22   37.66
   0   0  -9  497.73   13.66
   0   0  -9  502.90   13.96
   0   0   9  499.06   13.66
   0   0   9  499.65   13.96
   0   0  -9  498.92    9.45
   0   0  -9  490.65    9.23
   0   0   9  504.16    9.45
   0   0   9  518.86    9.82
   0   0 -10  114.32    3.69
   0   0 -10  120.89    4.06
   0   0  10  122.74    3.91
   0   0  10  117.64    4.06
   0   0 -10  125.47    2.95
   0   0 -10  125.17    2.88
   0   0  10  125.54    2.88
   0   0  10  127.54    3.03
   0   0 -11  234.54    6.87
   0   0 -11  220.81    6.72
   0   0  11  237.86    7.24
   0   0 -11  237.86    5.02
   0   0 -11  238.68    4.95
   0   0  11  224.50    4.73
   0   0  11  232.77    4.95
   0   0 -12   13.81    1.18
   0   0 -12   17.65    1.18
   0   0  12   18.17    1.18
   0   0  12   15.80    1.26
   0   0 -12   15.66    0.89
   0   0 -12   13.96    0.89
   0   0  12   15.73    0.96
   0   0  12   15.58    0.89
   0   0 -13  308.09    8.86
   0   0 -13  304.40    9.01
   0   0 -13  311.93    6.35
   0   0 -13  319.98    6.57
   0   0  13  329.36    6.65
   0   0  13  320.06    6.65
   0   0 -14   24.59    1.62
   0   0 -14   26.14    1.48
   0   0 -14   24.67    1.18
   0   0 -14   26.36    1.26
   0   0  14   23.78    1.11
   0   0 -15   44.01    1.99
   0   0 -15   48.22    2.29
   0   0  15   45.49    2.29
   0   0  15   42.39    2.14
   0   0  15   44.01    1.70
   0   0 -16   16.62    1.26
   0   0 -16   19.64    1.55
   0   0 -16   20.83    1.11
   0   0 -16   19.42    1.18
   0   0  16   19.79    1.18
   0   0  16   19.20    1.11
   0   0 -17  130.56    4.43
   0   0 -17  121.85    4.36
   0   0  17  124.14    4.58
   0   0  17  130.71    4.87
   0   0  17  116.38    3.03
   0   0  17  119.93    3.25
   0   0 -18   28.80    1.92
   0   0 -18   25.77    1.70
   0   0 -18   32.79    1.40
   0   0 -18   28.58    1.40
   0   0  18   31.61    1.40
   0   0  18   31.68    1.55
   0   0 -19  122.37    4.50
   0   0 -19  113.80    4.28
   0   0 -19  123.92    3.32
   0   0 -19  114.32    2.95
   0   0  19  109.59    3.10
   0   0  19  110.40    3.03
   0   0 -20    1.11    0.89
   0   0 -20    0.15    0.89
   0   0  20    0.52    1.33
   0   0  20   -0.30    0.96
   0   0 -20    0.96    0.52
   0   0 -20    0.89    0.59
   0   0  20    0.89    0.59
   0   0  20    0.59    0.59
   0   0 -21    0.00    1.03
   0   0 -21   -0.74    0.96
   0   0  21    0.66    0.96
   0   0  21    1.11    1.33
   0   0 -21   -0.37    0.44
   0   0 -21    0.30    0.52
   0   0  21   -0.15    0.44
   0   0  21    0.00    0.59
   0   0 -22    8.64    0.74
   0   0 -22    7.24    0.81
   0   0  22    7.98    0.96
   0   0  22    6.28    0.81
   0   0 -23    4.43    1.26
   0   0 -23    0.66    0.96
   0   0  23    1.40    0.81
   0   0  23   -0.52    1.26
   0   0 -23    3.99    0.59
   0   0 -23    3.77    0.74
   0   0  23    3.47    0.74
   0   0  23    3.69    0.66
   0  -1  23    0.30    0.74
   0  -1  23   -1.26    1.18
   0   1 -23   -0.59    0.96
   0   1 -23   -0.52    0.89
   0  -1  23    0.00    0.52
   0  -1  23    0.59    0.59
   0   1 -23    0.30    0.59
   0   1 -23    0.37    0.44
   0  -1  22    0.15    0.89
   0  -1  22   -0.44    1.33
   0   1 -22    2.51    1.48
   0   1 -22    1.11    1.03
   0  -1  22    0.15    0.59
   0  -1  22    0.30    0.52
   0   1 -22    0.30    0.44
   0   1 -22    0.89    0.52
   0  -1  21   -1.55    1.40
   0  -1  21    1.33    1.03
   0   1 -21    2.36    1.26
   0   1 -21    2.88    1.11
   0  -1  21    2.14    0.66
   0  -1  21    2.14    0.59
   0   1 -21    1.40    0.52
   0   1 -21    1.62    0.52
   0  -1  20    1.33    1.40
   0  -1  20    2.44    1.03
   0   1 -20    1.11    1.03
   0   1 -20    0.81    0.89
   0  -1  20    0.96    0.52
   0  -1  20    1.26    0.52
   0   1 -20    1.62    0.59
   0   1 -20    0.74    0.52
   0   1 -19    4.58    1.11
   0   1 -19    4.43    1.11
   0  -1  19    4.58    0.74
   0  -1  19    6.35    0.89
   0   1 -19    4.65    0.74
   0   1 -19    5.91    0.74
   0  -1  18   -0.44    0.96
   0   1 -18   -0.22    0.81
   0   1 -18    0.30    0.81
   0  -1  18    1.18    0.52
   0  -1  18    1.11    0.59
   0   1 -18    0.74    0.52
   0   1 -18    0.30    0.52
   0  -1  17    7.31    1.26
   0  -1  17    5.24    1.03
   0   1 -17    4.36    0.89
   0   1 -17    3.62    0.96
   0  -1  17    5.10    0.66
   0  -1  17    3.99    0.74
   0   1 -17    4.28    0.74
   0   1 -17    4.58    0.66
   0  -1  16   11.59    1.33
   0  -1  16   11.82    1.33
   0   1 -16   10.93    1.26
   0   1 -16    8.79    1.03
   0  -1  16   13.22    1.03
   0   1 -16   11.45    0.89
   0   1 -16   10.63    1.03
   0  -1  15    2.81    0.89
   0  -1  15    2.88    0.81
   0   1 -15    2.58    0.89
   0   1 -15    2.29    0.74
   0  -1  15    2.22    0.52
   0   1 -15    2.58    0.66
   0  -1  14    6.42    1.03
   0  -1  14    6.79    0.89
   0   1 -14    6.50    1.03
   0   1 -14    7.38    0.89
   0  -1  14    5.46    0.74
   0  -1  14    4.87    0.59
   0   1 -14    5.69    0.74
   0   1 -14    6.57    0.66
   0  -1  13    2.88    0.66
   0  -1  13    1.40    0.74
   0   1 -13    3.62    0.74
   0   1 -13    2.95    0.81
   0  -1  13    2.58    0.52
   0  -1  13    4.65    0.66
   0   1 -13    2.29    0.59
   0   1 -13    2.51    0.52
   0  -1  12    5.98    0.89
   0  -1  12    7.31    0.81
   0   1 -12    8.79    1.03
   0   1 -12    6.42    0.81
   0  -1  12    8.05    0.66
   0  -1  12    8.57    0.74
   0   1 -12    8.79    0.74
   0   1 -12    9.01    0.66
   0  -1  11  493.08   13.66
   0  -1  11  499.88   14.10
   0   1 -11  486.36   13.44
   0   1 -11  478.98   13.51
   0  -1  11  474.77    9.16
   0  -1  11  494.85    9.38
   0   1 -11  478.09    9.08
   0   1 -11  494.85    9.45
   0  -1  10  423.44   11.74
   0   1 -10  429.28   12.18
   0   1 -10  433.78    8.34
   0   1 -10  430.61    8.20
   0  -1   9    0.15    0.52
   0  -1   9    0.44    0.74
   0   1  -9    0.37    0.66
   0   1  -9   -0.15    0.52
   0  -1   9    0.07    0.44
   0  -1   9   -0.37    0.52
   0   1  -9    0.07    0.44
   0   1  -9    0.59    0.52
   0  -1   8   86.77    3.10
   0  -1   8   90.46    2.95
   0   1  -8   88.17    2.88
   0   1  -8   85.66    3.03
   0  -1   8   87.66    2.07
   0  -1   8   83.82    2.07
   0   1  -8   87.44    2.07
   0   1  -8   87.73    2.14
   0  -1   7   66.83    2.29
   0  -1   7   63.21    2.36
   0   1  -7   62.11    2.29
   0   1  -7   65.95    2.22
   0  -1   7   63.73    1.55
   0  -1   7   65.87    1.70
   0  -1   6  545.74   14.70
   0  -1   6  532.74   14.55
   0   1  -6  540.12   14.55
   0   1  -6  535.47   14.62
   0  -1   6  527.05    9.67
   0  -1   6  516.64    9.45
   0   1  -6  499.29    9.23
   0   1  -6  520.11    9.53
   0  -1   5 1567.05   41.28
   0  -1   5 1536.04   40.69
   0   1  -5 1566.31   41.28
   0   1  -5 1561.14   41.28
   0  -1   5 1578.13   28.06
   0  -1   5 1578.87   27.99
   0  -1   4  150.43    4.28
   0  -1   4  147.55    4.36
   0   1  -4  143.86    4.21
   0   1  -4  145.33    4.14
   0  -1   4  142.01    2.81
   0  -1   4  143.49    2.81
   0   1  -4  138.54    2.73
   0   1  -4  139.13    2.73
   0  -1   3 1256.89   33.16
   0  -1   3 1238.43   32.57
   0   1  -3 1253.94   33.08
   0   1  -3 1248.77   32.86
   0  -1   3 1227.35   21.71
   0  -1   3 1212.58   21.49
   0   1  -3 1204.46   21.34
   0   1  -3 1222.18   21.56
   0  -1   2  127.24    3.62
   0  -1   2  129.46    3.54
   0   1  -2  126.13    3.54
   0   1  -2  125.32    3.47
   0  -1   2  127.76    2.36
   0  -1   2  127.83    2.36
   0   1  -2  129.16    2.44
   0   1  -2  128.72    2.36
   0  -1   1    1.26    0.22
   0  -1   1    1.26    0.30
   0   1  -1    1.18    0.22
   0   1  -1    0.74    0.30
   0  -1   1    0.89    0.15
   0  -1   1    0.66    0.15
   0   1  -1    0.89    0.15
   0   1  -1    0.74    0.15
   0  -1   0   16.17    0.52
   0  -1   0   15.51    0.52
   0   1   0   16.10    0.52
   0   1   0   14.92    0.52
   0  -1   0   15.95    0.37
   0  -1   0   15.43    0.37
   0   1   0   15.51    0.37
   0   1   0   15.21    0.37
   0  -1  -1 1145.38   30.06
   0  -1  -1 1104.76   28.95
   0   1   1 1201.50   31.46
   0   1   1 1129.13   29.61
   0  -1  -1 1140.21   20.16
   0  -1  -1 1158.67   20.46
   0   1   1 1171.23   20.68
   0   1   1 1116.58   19.72
   0  -1  -2  259.65    6.94
   0  -1  -2  262.53    7.09
   0   1   2  263.93    7.02
   0   1   2  262.16    7.02
   0  -1  -2  272.65    5.02
   0  -1  -2  274.57    5.02
   0   1   2  268.44    4.95
   0   1   2  269.47    4.95
   0  -1  -3  399.52   10.71
   0  -1  -3  411.11   10.93
   0   1   3  400.55   10.71
   0   1   3  415.25   11.15
   0  -1  -3  417.61    7.68
   0  -1  -3  419.01    7.61
   0   1   3  413.25    7.53
   0   1   3  406.98    7.38
   0  -1  -4 3700.52   96.96
   0  -1  -4 3679.10   96.45
   0   1   4 3668.76   96.22
   0   1   4 3634.79   95.19
   0  -1  -4 3769.93   66.39
   0  -1  -4 3651.04   64.25
   0  -1  -5   88.03    2.66
   0  -1  -5   89.95    2.88
   0   1   5   91.35    2.73
   0   1   5   91.87    2.88
   0  -1  -5   93.79    2.14
   0  -1  -5   94.16    2.07
   0   1   5   93.93    2.14
   0   1   5   92.09    2.07
   0  -1  -6 9467.29  247.83
   0  -1  -6 9873.46  258.32
   0   1   6 9651.92  252.71
   0   1   6 9999.00  261.57
   0  -1  -6 9688.84  170.00
   0  -1  -6 9496.83  166.82
   0   1   6 9415.60  165.42
   0   1   6 9386.06  164.98
   0  -1  -7   88.25    2.95
   0  -1  -7   86.62    2.73
   0   1   7   85.44    2.73
   0   1   7   85.22    2.88
   0  -1  -7   83.52    2.07
   0  -1  -7   83.23    1.99
   0   1   7   82.41    1.99
   0   1   7   88.25    2.22
   0  -1  -8  821.93   22.15
   0  -1  -8  851.47   22.82
   0   1   8  806.42   21.79
   0   1   8  858.85   22.97
   0  -1  -8  812.33   14.92
   0  -1  -8  817.50   14.92
   0   1   8  823.40   15.06
   0   1   8  804.94   14.84
   0  -1  -9   97.63    3.32
   0  -1  -9   94.67    3.10
   0   1   9   96.45    3.18
   0   1   9   96.74    3.32
   0  -1  -9  100.51    2.51
   0  -1  -9  101.32    2.44
   0   1   9  101.02    2.44
   0   1   9  100.58    2.51
   0  -1 -10   76.73    2.66
   0  -1 -10   73.85    2.73
   0   1  10   76.73    2.88
   0   1  10   72.96    2.58
   0  -1 -10   67.05    1.92
   0  -1 -10   69.05    1.92
   0   1  10   67.35    1.85
   0   1  10   67.94    1.99
   0  -1 -11  223.69    6.57
   0   1  11  231.22    7.02
   0  -1 -11  231.73    4.95
   0  -1 -11  226.42    4.73
   0   1  11  228.56    4.80
   0   1  11  239.12    5.10
   0  -1 -12 1455.54   38.84
   0  -1 -12 1416.40   37.96
   0   1  12 1506.50   40.17
   0   1  12 1410.49   37.88
   0   1  12 1388.34   25.40
   0  -1 -13    5.83    0.74
   0  -1 -13    5.10    0.89
   0   1  13    5.98    0.81
   0   1  13    7.98    1.03
   0  -1 -13    5.24    0.66
   0  -1 -13    5.17    0.66
   0   1  13    4.87    0.74
   0   1  13    5.61    0.66
   0  -1 -14  432.31   12.18
   0  -1 -14  448.77   12.78
   0   1  14  426.55   12.33
   0   1  14  480.68   13.59
   0  -1 -15    0.30    0.59
   0  -1 -15    1.70    0.81
   0   1  15    1.11    0.74
   0   1  15    0.30    0.66
   0  -1 -15    0.07    0.52
   0  -1 -15    0.66    0.52
   0   1  15    0.15    0.52
   0   1  15    0.96    0.59
   0  -1 -16   74.96    3.10
   0  -1 -16   74.51    2.88
   0   1  16   70.97    3.03
   0   1  16   77.17    3.25
   0  -1 -16   76.51    2.29
   0  -1 -16   73.85    2.36
   0   1  16   76.14    2.29
   0   1  16   70.38    2.29
   0  -1 -17   24.30    1.55
   0  -1 -17   19.94    1.55
   0   1  17   17.87    1.62
   0   1  17   19.87    1.55
   0  -1 -17   22.08    1.26
   0  -1 -17   24.22    1.18
   0   1  17   24.15    1.33
   0   1  17   21.71    1.18
   0  -1 -18   99.40    3.69
   0  -1 -18  104.05    3.99
   0  -1 -18  100.36    2.73
   0  -1 -18   98.51    2.88
   0   1  18   90.09    2.73
   0   1  18   99.10    2.81
   0   1  19   43.27    2.51
   0  -1 -19   37.44    1.48
   0  -1 -19   41.35    1.77
   0   1  19   39.88    1.70
   0   1  19   40.47    1.62
   0  -1 -20   63.73    2.95
   0  -1 -20   59.00    2.88
   0  -1 -20   63.21    2.22
   0  -1 -20   61.59    1.99
   0   1  20   63.29    2.22
   0   1  20   60.19    2.07
   0  -1 -21    1.85    1.03
   0  -1 -21    1.03    0.96
   0   1  21    2.81    1.18
   0   1  21    1.03    1.26
   0  -1 -21   -0.44    0.59
   0  -1 -21    0.30    0.52
   0   1  21    0.81    0.52
   0   1  21    0.74    0.59
   0  -1 -22    0.22    0.96
   0  -1 -22   -0.89    0.96
   0   1  22    0.07    0.89
   0  -1 -22    0.74    0.59
   0  -1 -22   -0.37    0.44
   0   1  22   -0.15    0.59
   0   1  22   -0.59    0.44
   0   1  23    4.14    1.03
   0   1  23    0.96    1.26
   0  -1 -23    5.24    0.89
   0  -1 -23    5.69    0.66
   0   1  23    4.87    0.81
   0   1  23    4.80    0.81
   0  -2  23    0.89    0.81
   0  -2  23   -0.30    1.11
   0   2 -23    2.51    1.03
   0   2 -23   -0.15    0.89
   0  -2  23    3.62    0.74
   0  -2  23    2.66    0.66
   0   2 -23    4.14    0.74
   0   2 -23    3.32    0.59
   0  -2  22    1.26    0.96
   0  -2  22    0.22    1.40
   0  -2  22    3.40    0.59
   0  -2  22    2.95    0.66
   0   2 -22    2.44    0.52
   0   2 -22    1.85    0.66
   0   2 -21    6.79    1.55
   0   2 -21    9.01    1.40
   0  -2  21    8.94    0.81
   0  -2  21    9.97    0.96
   0   2 -21    8.64    0.81
   0   2 -21    8.05    0.74
   0  -2  20    0.30    1.03
   0  -2  20   -0.15    1.11
   0   2 -20    0.81    0.89
   0   2 -20    2.14    1.11
   0  -2  20    0.00    0.44
   0  -2  20   -0.22    0.52
   0   2 -20    0.59    0.52
   0   2 -20    0.66    0.44
   0  -2  19   17.13    1.77
   0  -2  19   17.87    1.92
   0   2 -19   13.88    1.55
   0   2 -19   13.81    1.48
   0  -2  19   13.07    1.03
   0  -2  19   12.78    0.96
   0   2 -19   12.92    1.03
   0   2 -19   12.18    0.89
   0  -2  18    1.62    0.52
   0  -2  18    1.55    0.66
   0   2 -18    1.26    0.52
   0   2 -18    0.81    0.52
   0  -2  17   16.91    1.55
   0  -2  17   18.09    1.55
   0   2 -17   17.95    1.48
   0   2 -17   14.03    1.48
   0  -2  17   14.10    1.11
   0  -2  17   13.29    0.96
   0   2 -17   13.66    0.96
   0   2 -17   13.81    1.03
   0  -2  16    3.62    0.81
   0  -2  16    2.73    0.96
   0   2 -16    2.22    0.89
   0   2 -16    3.84    0.81
   0  -2  15    4.80    0.96
   0  -2  15    7.09    0.89
   0   2 -15    7.46    1.18
   0   2 -15    8.34    0.96
   0  -2  15    7.16    0.74
   0  -2  15    6.13    0.81
   0   2 -15    6.35    0.66
   0   2 -15    7.46    0.74
   0  -2  14   15.88    1.18
   0  -2  14   14.99    1.40
   0   2 -14   14.03    1.33
   0   2 -14   16.62    1.18
   0  -2  14   16.17    0.96
   0  -2  14   17.35    1.03
   0   2 -14   17.50    0.96
   0   2 -14   15.36    0.96
   0  -2  13   24.74    1.70
   0  -2  13   21.19    1.33
   0   2 -13   23.48    1.55
   0   2 -13   23.63    1.40
   0  -2  13   23.78    1.03
   0  -2  13   25.26    1.18
   0   2 -13   25.03    1.03
   0   2 -13   24.96    1.18
   0  -2  12   26.14    1.40
   0  -2  12   27.32    1.70
   0   2 -12   25.92    1.62
   0   2 -12   29.24    1.55
   0  -2  12   22.23    0.96
   0  -2  12   22.15    1.03
   0   2 -12   25.03    1.11
   0   2 -12   23.34    1.03
   0  -2  11  125.47    4.06
   0  -2  11  129.53    4.43
   0   2 -11  123.84    4.21
   0   2 -11  124.29    3.99
   0  -2  11  126.72    2.95
   0  -2  11  127.61    2.88
   0   2 -11  129.31    3.03
   0   2 -11  128.94    2.88
   0  -2  10    0.52    0.37
   0  -2  10    0.30    0.44
   0   2 -10   -0.30    0.44
   0   2 -10    0.30    0.44
   0  -2   9   47.48    2.14
   0  -2   9   44.90    1.85
   0   2  -9   44.16    1.77
   0   2  -9   46.52    2.07
   0  -2   9   46.15    1.33
   0  -2   9   47.04    1.48
   0   2  -9   46.89    1.33
   0   2  -9   47.41    1.48
   0  -2   8    0.22    0.66
   0  -2   8    0.07    0.52
   0   2  -8    0.81    0.66
   0   2  -8    0.59    0.52
   0  -2   8    1.40    0.52
   0  -2   8    1.03    0.37
   0   2  -8   -0.07    0.37
   0   2  -8    0.22    0.52
   0  -2   7   22.23    1.33
   0  -2   7   23.41    1.18
   0   2  -7   22.97    1.11
   0   2  -7   23.04    1.33
   0  -2   7   25.03    0.96
   0  -2   7   23.63    0.81
   0   2  -7   23.19    0.81
   0   2  -7   24.30    0.89
   0  -2   6  564.94   15.29
   0  -2   6  571.29   15.58
   0   2  -6  570.92   15.43
   0   2  -6  563.90   15.43
   0  -2   6  571.21   10.41
   0  -2   6  572.25   10.41
   0   2  -6  551.64   10.12
   0   2  -6  567.30   10.26
   0  -2   5   27.10    1.40
   0  -2   5   30.65    1.26
   0   2  -5   27.25    1.33
   0   2  -5   26.81    1.18
   0  -2   5   27.03    0.81
   0  -2   5   28.73    0.89
   0   2  -5   27.69    0.89
   0   2  -5   27.40    0.81
   0  -2   4  519.52   14.10
   0  -2   4  542.49   14.55
   0   2  -4  529.19   14.18
   0   2  -4  538.57   14.62
   0  -2   4  534.58    9.60
   0  -2   4  519.00    9.38
   0   2  -4  529.49    9.60
   0   2  -4  518.12    9.30
   0  -2   3  155.82    4.43
   0  -2   3  167.34    4.80
   0   2  -3  162.76    4.73
   0   2  -3  172.73    4.87
   0  -2   3  164.46    3.10
   0  -2   3  168.45    3.18
   0   2  -3  161.51    3.10
   0   2  -3  166.67    3.10
   0  -2   2  413.62   11.15
   0  -2   2  424.70   11.37
   0   2  -2  408.16   10.93
   0   2  -2  416.94   11.22
   0  -2   2  410.00    7.38
   0  -2   2  409.63    7.31
   0   2  -2  407.57    7.31
   0   2  -2  411.26    7.38
   0  -2   1    1.70    0.37
   0  -2   1    1.11    0.30
   0   2  -1    0.96    0.30
   0   2  -1    1.70    0.44
   0  -2   1    1.85    0.30
   0  -2   1    1.33    0.30
   0   2  -1    1.18    0.30
   0   2  -1    1.55    0.30
   0  -2   0   10.49    0.52
   0  -2   0   10.12    0.52
   0  -2   0   10.04    0.44
   0  -2   0    9.97    0.44
   0   2   0    9.75    0.44
   0   2   0   10.19    0.44
   0  -2  -1    0.52    0.30
   0  -2  -1    0.37    0.22
   0   2   1    0.44    0.30
   0   2   1    0.22    0.30
   0  -2  -1    0.22    0.30
   0  -2  -1    0.44    0.30
   0   2   1    0.37    0.30
   0   2   1   -0.37    0.30
   0  -2  -2  344.28    9.23
   0  -2  -2  333.79    8.94
   0   2   2  336.89    9.01
   0   2   2  335.34    9.01
   0  -2  -2  330.32    6.13
   0  -2  -2  339.33    6.28
   0   2   2  340.66    6.28
   0   2   2  334.24    6.13
   0  -2  -3   16.39    0.96
   0  -2  -3   15.51    0.81
   0   2   3   15.88    0.89
   0   2   3   15.58    0.81
   0  -2  -3   17.28    0.74
   0  -2  -3   15.88    0.74
   0   2   3   18.98    0.74
   0   2   3   17.06    0.74
   0   2   4   17.35    0.96
   0   2   4   19.20    1.03
   0  -2  -4   16.39    0.81
   0  -2  -4   15.58    0.74
   0   2   4   17.58    0.81
   0   2   4   15.88    0.81
   0  -2  -5   80.94    2.66
   0  -2  -5   82.19    2.51
   0   2   5   82.34    2.58
   0   2   5   81.53    2.66
   0  -2  -5   88.69    2.07
   0  -2  -5   90.32    2.14
   0   2   5   84.11    2.07
   0   2   5   84.93    1.99
   0  -2  -6 3526.24   92.53
   0  -2  -6 3405.86   89.50
   0   2   6 3457.56   90.83
   0   2   6 3488.57   91.50
   0  -2  -6 3471.59   61.44
   0  -2  -6 3528.45   62.33
   0   2   6 3500.39   61.96
   0   2   6 3471.59   61.37
   0  -2  -7    1.48    0.66
   0  -2  -7    1.55    0.52
   0   2   7    2.14    0.66
   0   2   7    0.81    0.44
   0  -2  -7    0.59    0.44
   0  -2  -7    0.81    0.52
   0   2   7    0.96    0.52
   0   2   7    1.77    0.52
   0  -2  -8  261.42    7.53
   0  -2  -8  260.02    7.38
   0   2   8  260.09    7.53
   0   2   8  249.46    7.09
   0  -2  -8  247.09    5.10
   0  -2  -8  257.51    5.17
   0   2   8  253.74    5.10
   0   2   8  251.45    5.17
   0  -2  -9  135.22    4.28
   0  -2  -9  133.74    4.14
   0   2   9  137.95    4.43
   0   2   9  140.09    4.28
   0  -2  -9  140.24    3.18
   0  -2  -9  137.28    3.18
   0   2   9  146.44    3.40
   0   2   9  138.02    3.10
   0  -2 -10  294.43    8.57
   0  -2 -10  293.47    8.34
   0   2  10  290.59    8.27
   0   2  10  291.26    8.49
   0  -2 -10  291.33    5.91
   0  -2 -10  295.24    6.06
   0   2  10  297.46    5.98
   0   2  10  295.17    6.13
   0  -2 -11  626.75   17.13
   0   2  11  599.87   16.62
   0   2  11  610.50   11.67
   0   2  11  612.49   11.59
   0  -2 -12  838.17   22.82
   0  -2 -12  812.33   22.01
   0   2  12  835.96   22.89
   0   2  12  879.53   23.78
   0  -2 -12  830.05   15.43
   0  -2 -12  790.91   14.84
   0   2  12  830.05   15.43
   0   2  12  808.63   15.29
   0  -2 -13  170.51    5.46
   0  -2 -13  163.57    5.10
   0   2  13  165.49    5.17
   0   2  13  175.46    5.61
   0  -2 -14  138.17    4.65
   0  -2 -14  133.74    4.36
   0   2  14  143.78    4.87
   0   2  14  136.32    4.50
   0  -2 -14  149.02    3.54
   0  -2 -14  139.57    3.47
   0   2  14  135.66    3.54
   0   2  14  141.20    3.47
   0  -2 -15    7.16    1.03
   0  -2 -15    6.65    0.89
   0   2  15    6.79    0.96
   0   2  15    5.69    0.96
   0  -2 -15    7.16    0.81
   0   2  15    8.42    0.89
   0   2  15    7.24    0.74
   0  -2 -16   31.53    1.85
   0  -2 -16   29.02    1.62
   0   2  16   27.47    1.77
   0   2  16   29.69    1.85
   0  -2 -16   27.10    1.40
   0  -2 -16   25.85    1.26
   0   2  16   28.28    1.48
   0   2  16   27.99    1.33
   0  -2 -17   52.43    2.29
   0  -2 -17   55.16    2.58
   0  -2 -17   50.81    1.77
   0  -2 -17   49.77    1.92
   0   2  17   51.77    1.85
   0   2  17   52.43    1.99
   0  -2 -18   46.30    2.36
   0  -2 -18   45.27    2.22
   0  -2 -18   44.97    1.85
   0  -2 -18   44.38    1.62
   0   2  18   43.72    1.77
   0   2  18   46.45    1.77
   0  -2 -19    0.52    0.81
   0   2  19    1.11    0.89
   0  -2 -19    0.15    0.52
   0  -2 -19    1.11    0.66
   0   2  19    0.66    0.59
   0   2  19    0.30    0.52
   0  -2 -20   87.44    2.51
   0  -2 -20   85.22    2.66
   0   2  20   89.36    2.66
   0   2  20   91.72    2.81
   0  -2 -21    8.71    0.81
   0  -2 -21    6.13    0.81
   0   2  21    7.75    0.89
   0   2  21    7.02    0.81
   0   2  22    5.54    1.18
   0   2  22    2.58    1.33
   0  -2 -22    5.46    0.81
   0  -2 -22    6.13    0.74
   0   2  22    7.31    0.89
   0   2  22    5.61    0.74
   0   2  23   12.41    1.85
   0  -2 -23   11.22    0.89
   0  -2 -23    8.94    1.03
   0   2  23   11.74    1.03
   0  -3  22    0.00    0.74
   0  -3  22    0.44    1.11
   0   3 -22    0.30    0.96
   0   3 -22    0.59    0.96
   0  -3  22    1.11    0.52
   0  -3  22    0.59    0.52
   0   3 -22   -0.30    0.44
   0   3 -22    0.74    0.59
   0  -3  21    1.99    1.26
   0  -3  21    1.40    1.03
   0   3 -21   -0.44    1.33
   0   3 -21    0.15    1.11
   0  -3  21    0.96    0.59
   0  -3  21    0.66    0.44
   0   3 -21    0.37    0.44
   0   3 -21    1.40    0.52
   0  -3  20    9.45    1.85
   0  -3  20   11.52    1.62
   0  -3  20   12.70    0.89
   0  -3  20   11.22    0.96
   0  -3  19   34.04    2.22
   0  -3  19   34.12    2.44
   0  -3  18   -0.59    0.96
   0  -3  18    1.33    1.03
   0   3 -18    1.55    0.96
   0   3 -18    0.44    0.96
   0  -3  18   -0.30    0.59
   0  -3  18    0.52    0.52
   0   3 -18    0.22    0.52
   0   3 -18    0.30    0.44
   0  -3  17   55.31    2.44
   0  -3  17   53.98    2.81
   0  -3  16   14.62    1.26
   0  -3  16   18.83    1.62
   0   3 -16   14.40    1.33
   0   3 -16   18.24    1.62
   0  -3  16   17.50    1.11
   0  -3  16   15.73    0.96
   0   3 -16   18.83    1.11
   0   3 -16   19.57    1.03
   0  -3  15   96.59    3.84
   0  -3  15   97.77    3.47
   0  -3  15  100.36    2.58
   0  -3  15   99.10    2.66
   0   3 -15  103.61    2.66
   0   3 -15  104.20    2.73
   0  -3  14   17.35    1.26
   0  -3  14   20.23    1.62
   0   3 -14   18.76    1.33
   0   3 -14   18.17    1.48
   0  -3  14   18.24    0.96
   0  -3  14   18.17    1.03
   0   3 -14   18.91    1.03
   0   3 -14   19.72    0.96
   0  -3  13   24.89    1.48
   0  -3  13   26.73    1.77
   0   3 -13   26.66    1.48
   0   3 -13   27.69    1.70
   0  -3  13   26.88    1.18
   0  -3  13   27.91    1.11
   0   3 -13   25.77    1.11
   0   3 -13   29.39    1.26
   0  -3  12  105.31    3.54
   0  -3  12  105.31    3.91
   0   3 -12  101.54    3.47
   0   3 -12  102.35    3.77
   0  -3  12  103.76    2.58
   0  -3  12  107.97    2.58
   0   3 -12  102.80    2.58
   0   3 -12  103.02    2.44
   0  -3  11   53.10    2.14
   0  -3  11   50.14    2.36
   0   3 -11   50.51    2.07
   0   3 -11   52.36    2.36
   0  -3  11   53.24    1.48
   0  -3  11   53.24    1.62
   0   3 -11   50.66    1.48
   0   3 -11   52.65    1.62
   0  -3  10  328.18    9.30
   0  -3  10  323.75    9.53
   0   3 -10  320.87    9.38
   0   3 -10  316.95    9.08
   0  -3  10  309.20    6.13
   0  -3  10  315.55    6.13
   0   3 -10  319.98    6.20
   0   3 -10  321.68    6.35
   0  -3   9    2.88    0.66
   0   3  -9    4.80    0.89
   0  -3   9    5.61    0.52
   0  -3   9    5.10    0.59
   0   3  -9    5.54    0.59
   0   3  -9    5.17    0.52
   0  -3   8  246.06    7.38
   0  -3   8  240.01    6.94
   0   3  -8  246.95    7.31
   0   3  -8  250.12    7.24
   0  -3   8  254.85    5.02
   0  -3   8  247.54    4.80
   0   3  -8  248.72    4.95
   0   3  -8  247.91    4.80
   0  -3   7  271.02    7.68
   0  -3   7  267.03    7.83
   0   3  -7  273.46    7.75
   0   3  -7  272.57    7.98
   0  -3   7  277.22    5.32
   0  -3   7  276.34    5.24
   0   3  -7  273.53    5.32
   0   3  -7  266.81    5.10
   0  -3   6    3.03    0.81
   0  -3   6    2.29    0.52
   0   3  -6    1.48    0.66
   0   3  -6    1.77    0.52
   0  -3   6    2.07    0.37
   0  -3   6    2.29    0.44
   0   3  -6    2.14    0.44
   0   3  -6    2.73    0.44
   0  -3   5    8.94    0.74
   0  -3   5    9.38    0.96
   0   3  -5    7.31    0.81
   0   3  -5    8.42    0.74
   0  -3   5    6.72    0.44
   0  -3   5    5.98    0.52
   0   3  -5    6.79    0.52
   0   3  -5    6.13    0.44
   0  -3   4   63.07    2.29
   0  -3   4   58.71    1.99
   0   3  -4   65.43    2.36
   0   3  -4   58.56    1.99
   0  -3   4   60.56    1.33
   0  -3   4   61.29    1.40
   0   3  -4   60.19    1.33
   0   3  -4   60.78    1.40
   0  -3   3 1838.07   48.52
   0  -3   3 1855.80   48.81
   0   3  -3 1849.15   48.81
   0   3  -3 1853.58   48.74
   0  -3   3 1837.33   32.49
   0  -3   3 1855.06   32.79
   0   3  -3 1845.46   32.57
   0   3  -3 1824.04   32.27
   0  -3   2  382.46   10.41
   0  -3   2  402.47   10.86
   0   3  -2  384.60   10.34
   0   3  -2  390.06   10.63
   0  -3   2  380.98    6.94
   0  -3   2  390.29    7.09
   0   3  -2  387.41    7.02
   0   3  -2  391.76    7.16
   0  -3   1  191.86    5.32
   0  -3   1  179.89    5.10
   0   3  -1  181.22    5.02
   0   3  -1  180.34    5.10
   0  -3   1  178.79    3.40
   0  -3   1  177.60    3.40
   0   3  -1  182.40    3.47
   0   3  -1  181.96    3.47
   0  -3   0  645.87   17.13
   0  -3   0  627.93   16.69
   0   3   0  622.61   16.54
   0   3   0  610.65   16.25
   0   3   0  631.03   11.37
   0   3   0  630.22   11.37
   0  -3  -1  120.30    3.40
   0  -3  -1  122.07    3.47
   0   3   1  121.92    3.47
   0   3   1  122.22    3.47
   0  -3  -1  122.14    2.51
   0  -3  -1  122.74    2.58
   0   3   1  122.22    2.51
   0   3   1  123.47    2.58
   0  -3  -2  917.93   24.30
   0  -3  -2  892.82   23.56
   0   3   2  916.45   24.30
   0   3   2  928.27   24.52
   0  -3  -2  901.68   16.25
   0  -3  -2  893.56   16.02
   0   3   2  901.68   16.25
   0   3   2  912.76   16.39
   0  -3  -3  280.70    7.68
   0  -3  -3  278.18    7.68
   0   3   3  282.10    7.75
   0   3   3  278.70    7.61
   0  -3  -3  276.12    5.32
   0  -3  -3  275.53    5.32
   0   3   3  275.38    5.32
   0   3   3  280.55    5.46
   0  -3  -4  682.87   18.24
   0  -3  -4  683.39   18.24
   0   3   4  692.10   18.39
   0   3   4  688.93   18.46
   0  -3  -4  689.59   12.55
   0  -3  -4  702.59   12.92
   0   3   4  678.14   12.41
   0   3   4  684.05   12.55
   0  -3  -5  114.76    3.47
   0  -3  -5  114.32    3.54
   0   3   5  122.51    3.69
   0   3   5  113.65    3.54
   0  -3  -5  112.32    2.58
   0  -3  -5  112.91    2.51
   0   3   5  116.90    2.66
   0   3   5  110.55    2.58
   0  -3  -6  209.14    5.91
   0  -3  -6  202.42    5.83
   0   3   6  204.34    5.98
   0   3   6  205.81    5.83
   0  -3  -6  222.80    4.58
   0  -3  -6  219.03    4.43
   0   3   6  216.00    4.43
   0   3   6  217.04    4.50
   0  -3  -7  106.27    3.40
   0  -3  -7  106.49    3.32
   0   3   7  107.82    3.47
   0   3   7  109.96    3.40
   0  -3  -7  110.40    2.58
   0  -3  -7  113.87    2.73
   0   3   7  110.11    2.58
   0   3   7  109.29    2.66
   0  -3  -8   70.16    2.44
   0  -3  -8   71.78    2.58
   0   3   8   73.85    2.66
   0   3   8   69.42    2.44
   0  -3  -8   76.21    1.99
   0  -3  -8   79.09    2.14
   0   3   8   73.48    2.07
   0   3   8   77.32    2.07
   0  -3  -9  313.26    8.94
   0  -3  -9  322.12    9.08
   0   3   9  316.51    9.08
   0   3   9  314.96    8.86
   0  -3  -9  312.97    6.28
   0  -3  -9  310.60    6.35
   0   3   9  312.08    6.28
   0   3   9  316.95    6.42
   0  -3 -10    2.36    0.89
   0   3  10    2.66    0.74
   0  -3 -10    2.07    0.59
   0  -3 -10    3.03    0.66
   0   3  10    1.99    0.59
   0   3  10    2.29    0.66
   0  -3 -11   82.86    2.88
   0  -3 -11   78.94    3.03
   0   3  11   83.30    2.95
   0   3  11   78.57    3.03
   0  -3 -11   83.45    2.36
   0  -3 -11   82.86    2.29
   0   3  11   82.86    2.29
   0   3  11   81.23    2.36
   0  -3 -12   94.16    3.40
   0  -3 -12   96.81    3.32
   0   3  12   98.66    3.54
   0   3  12  103.98    3.47
   0  -3 -13   22.38    1.33
   0  -3 -13   23.48    1.55
   0   3  13   20.09    1.26
   0   3  13   20.75    1.48
   0  -3 -13   19.50    1.03
   0  -3 -13   22.30    1.18
   0   3  13   22.60    1.18
   0   3  13   21.27    1.26
   0  -3 -14   75.99    2.81
   0  -3 -14   78.80    3.10
   0   3  14   73.92    2.81
   0   3  14   77.24    3.10
   0  -3 -14   75.84    2.36
   0  -3 -14   77.98    2.29
   0   3  14   79.09    2.58
   0  -3 -15   23.11    1.48
   0  -3 -15   22.75    1.62
   0   3  15   20.75    1.40
   0   3  15   24.74    1.62
   0  -3 -15   24.07    1.26
   0  -3 -15   24.81    1.26
   0   3  15   27.99    1.48
   0   3  15   26.36    1.26
   0  -3 -16    9.23    1.18
   0  -3 -16    7.09    0.89
   0   3  16    6.20    0.96
   0   3  16    6.94    1.03
   0   3  16    8.12    0.81
   0   3  16    6.35    0.89
   0  -3 -17    8.12    1.18
   0  -3 -17   10.04    1.11
   0   3  17    9.75    1.18
   0   3  17   11.30    1.26
   0  -3 -17    9.45    0.81
   0  -3 -17    9.67    0.96
   0   3  17   11.22    0.96
   0   3  17    9.45    0.96
   0  -3 -18   49.03    2.44
   0  -3 -18   48.74    2.29
   0  -3 -18   51.92    1.85
   0  -3 -18   47.63    1.92
   0   3  18   53.98    2.07
   0   3  18   50.22    1.85
   0  -3 -19   14.03    1.48
   0   3  19   11.82    1.40
   0   3  19   10.78    0.96
   0   3  19   13.29    1.11
   0  -3 -20    2.29    0.89
   0  -3 -20    2.07    1.03
   0   3  20    2.07    1.03
   0   3  20    2.14    1.11
   0  -3 -20    1.11    0.66
   0  -3 -20    1.40    0.52
   0   3  20    1.77    0.66
   0   3  20    0.81    0.66
   0  -3 -21    1.85    0.96
   0  -3 -21    1.48    1.11
   0   3  21    2.44    1.03
   0   3  21    3.91    1.18
   0  -3 -21    1.55    0.52
   0  -3 -21    1.26    0.66
   0   3  21    0.81    0.59
   0   3  21    1.55    0.66
   0  -3 -22    0.96    0.89
   0  -3 -22   -0.22    1.03
   0   3  22    2.22    0.89
   0   3  22    0.96    1.18
   0  -3 -22    1.18    0.52
   0  -3 -22    1.18    0.59
   0   3  22    1.77    0.59
   0   3  22    0.22    0.66
   0  -3 -23    1.18    1.26
   0  -3 -23   -0.30    1.11
   0   3  23    2.07    1.40
   0   3  23    0.37    0.66
   0  -3 -23    0.22    0.52
   0   3  23    0.96    0.59
   0  -4  22    0.52    0.74
   0  -4  22    0.44    1.33
   0   4 -22    0.22    1.03
   0   4 -22    1.77    1.03
   0   4 -22    1.03    0.59
   0   4 -22    0.59    0.52
   0  -4  21   -1.26    1.18
   0  -4  21    1.40    0.89
   0   4 -21    0.59    1.48
   0   4 -21    1.18    1.11
   0  -4  21    0.30    0.59
   0  -4  21   -0.07    0.44
   0   4 -21    0.66    0.52
   0   4 -21    0.30    0.52
   0  -4  20    3.18    1.11
   0   4 -20    1.48    1.03
   0   4 -20    2.36    1.40
   0  -4  20    2.29    0.52
   0  -4  20    1.33    0.66
   0   4 -20    0.96    0.52
   0   4 -20    0.96    0.52
   0  -4  19    3.77    1.03
   0  -4  19    5.02    1.33
   0   4 -19    4.50    1.18
   0   4 -19    1.62    1.26
   0  -4  19    3.47    0.59
   0  -4  19    3.69    0.74
   0   4 -19    3.40    0.59
   0   4 -19    5.32    0.66
   0  -4  18    8.27    1.11
   0  -4  18   10.12    1.48
   0   4 -18    8.42    1.33
   0   4 -18    6.28    1.40
   0  -4  17    2.66    0.81
   0  -4  17    1.99    0.52
   0   4 -17    0.59    0.52
   0   4 -17    1.55    0.52
   0  -4  16   15.21    1.55
   0  -4  16   14.92    1.26
   0   4 -16   13.22    1.55
   0   4 -16   12.41    1.26
   0  -4  16   11.96    0.96
   0  -4  16   12.78    0.89
   0   4 -16   12.70    0.89
   0   4 -16   12.78    0.89
   0  -4  15    1.26    0.66
   0  -4  15    1.55    0.89
   0   4 -15    1.55    0.96
   0   4 -15    2.07    0.74
   0  -4  15    1.48    0.59
   0  -4  15    1.77    0.44
   0   4 -15    1.70    0.52
   0   4 -15    1.55    0.52
   0  -4  14   62.18    2.88
   0  -4  14   68.68    2.73
   0   4 -14   72.67    2.88
   0   4 -14   67.87    2.95
   0  -4  14   71.12    1.99
   0  -4  14   69.34    2.07
   0   4 -14   70.82    1.99
   0   4 -14   69.86    1.99
   0  -4  13   54.28    2.58
   0  -4  13   56.12    2.36
   0   4 -13   56.86    2.66
   0   4 -13   56.86    2.36
   0  -4  13   50.14    1.62
   0  -4  13   52.73    1.55
   0   4 -13   51.55    1.55
   0   4 -13   52.51    1.62
   0  -4  12   36.33    1.77
   0  -4  12   32.35    1.92
   0   4 -12   36.26    1.77
   0   4 -12   34.34    1.99
   0  -4  12   31.53    1.26
   0  -4  12   31.98    1.11
   0   4 -12   32.49    1.26
   0   4 -12   31.98    1.18
   0  -4  11   12.11    1.03
   0  -4  11   11.00    1.26
   0   4 -11   14.18    1.03
   0   4 -11   13.59    1.26
   0  -4  11   10.34    0.66
   0  -4  11    9.82    0.74
   0   4 -11   12.41    0.81
   0   4 -11   11.22    0.74
   0  -4  10   36.85    1.99
   0  -4  10   38.70    1.77
   0   4 -10   42.17    1.85
   0   4 -10   39.66    1.99
   0  -4  10   38.84    1.18
   0  -4  10   36.85    1.26
   0   4 -10   40.99    1.33
   0   4 -10   39.36    1.26
   0  -4   9    1.40    0.89
   0   4  -9    3.32    0.66
   0  -4   9    2.07    0.52
   0  -4   9    2.29    0.44
   0   4  -9    2.22    0.52
   0   4  -9    1.70    0.44
   0  -4   8   10.19    1.26
   0  -4   8   10.49    0.89
   0   4  -8   12.70    1.18
   0   4  -8   10.49    0.89
   0  -4   8   10.41    0.74
   0  -4   8   10.56    0.59
   0   4  -8   10.63    0.66
   0   4  -8   10.71    0.66
   0  -4   7  635.17   17.21
   0  -4   7  627.12   17.28
   0   4  -7  617.81   16.76
   0   4  -7  631.99   17.43
   0  -4   7  608.65   11.08
   0  -4   7  630.14   11.52
   0   4  -7  625.71   11.37
   0   4  -7  626.67   11.52
   0  -4   6   16.32    0.96
   0  -4   6   19.64    1.33
   0   4  -6   19.35    1.33
   0   4  -6   15.88    0.96
   0  -4   6   18.68    0.74
   0  -4   6   16.91    0.66
   0   4  -6   16.84    0.74
   0   4  -6   18.09    0.74
   0  -4   5  221.99    6.35
   0  -4   5  239.71    7.02
   0   4  -5  239.05    7.02
   0   4  -5  236.68    6.72
   0  -4   5  234.91    4.50
   0  -4   5  235.65    4.50
   0   4  -5  239.78    4.58
   0   4  -5  237.79    4.58
   0  -4   4  173.03    5.02
   0  -4   4  172.51    5.17
   0   4  -4  166.45    4.80
   0   4  -4  175.02    5.24
   0  -4   4  174.80    3.40
   0  -4   4  170.22    3.32
   0   4  -4  168.00    3.32
   0   4  -4  166.97    3.32
   0  -4   3    5.24    0.59
   0  -4   3    6.65    0.81
   0   4  -3    5.54    0.59
   0   4  -3    6.50    0.81
   0  -4   3    5.10    0.52
   0  -4   3    5.24    0.44
   0   4  -3    4.87    0.52
   0   4  -3    5.83    0.52
   0  -4   2 1550.07   40.84
   0  -4   2 1555.24   41.13
   0   4  -2 1551.54   41.06
   0   4  -2 1551.54   40.91
   0  -4   2 1541.94   27.32
   0  -4   2 1530.87   27.18
   0   4  -2 1540.47   27.32
   0   4  -2 1521.27   27.03
   0  -4   1 2126.82   55.98
   0  -4   1 2202.14   57.90
   0   4  -1 2213.96   58.19
   0   4  -1 2098.76   55.31
   0  -4   1 2148.97   38.03
   0  -4   1 2107.62   37.29
   0   4  -1 2119.43   37.51
   0   4  -1 2125.34   37.59
   0  -4   0  362.22    9.82
   0  -4   0  355.21    9.60
   0   4   0  357.35    9.75
   0   4   0  366.14    9.90
   0  -4   0  352.25    6.57
   0  -4   0  368.35    6.87
   0   4   0  365.33    6.79
   0   4   0  358.83    6.72
   0  -4  -1  186.84    5.24
   0  -4  -1  184.47    5.17
   0   4   1  185.80    5.24
   0   4   1  183.73    5.17
   0  -4  -1  182.48    3.62
   0  -4  -1  190.60    3.84
   0   4   1  190.82    3.84
   0   4   1  185.88    3.77
   0  -4  -2  374.33   10.19
   0  -4  -2  371.38   10.04
   0   4   2  365.62    9.90
   0   4   2  367.47    9.97
   0  -4  -2  366.14    6.94
   0  -4  -2  366.43    6.94
   0   4   2  391.10    7.38
   0   4   2  380.61    7.24
   0  -4  -3 1361.75   35.89
   0  -4  -3 1295.29   34.27
   0   4   3 1341.08   35.45
   0   4   3 1324.09   34.93
   0  -4  -3 1310.06   23.48
   0  -4  -3 1343.29   24.15
   0   4   3 1332.22   23.85
   0   4   3 1310.06   23.56
   0  -4  -4 2552.92   67.13
   0  -4  -4 2566.21   67.42
   0   4   4 2569.91   67.50
   0   4   4 2662.95   70.01
   0  -4  -4 2547.75   45.19
   0  -4  -4 2513.78   44.68
   0   4   4 2564.00   45.56
   0   4   4 2578.03   45.79
   0  -4  -5    2.07    0.74
   0  -4  -5    1.11    0.59
   0   4   5    0.89    0.59
   0   4   5    1.18    0.74
   0  -4  -5    0.96    0.59
   0  -4  -5    1.70    0.52
   0   4   5    2.44    0.66
   0   4   5    1.48    0.52
   0  -4  -6  189.05    5.46
   0  -4  -6  191.78    5.61
   0   4   6  197.47    5.83
   0   4   6  188.90    5.46
   0  -4  -6  188.68    3.99
   0  -4  -6  194.00    4.21
   0   4   6  189.57    4.06
   0   4   6  191.49    4.06
   0  -4  -7  423.81   11.67
   0  -4  -7  418.13   11.59
   0   4   7  426.32   11.89
   0   4   7  401.51   11.00
   0  -4  -7  427.95    8.34
   0  -4  -7  420.79    8.12
   0   4   7  443.46    8.64
   0   4   7  442.42    8.49
   0  -4  -8    3.99    0.89
   0  -4  -8    3.03    0.66
   0   4   8    3.99    0.81
   0   4   8    3.25    0.74
   0  -4  -8    4.21    0.74
   0  -4  -8    3.54    0.59
   0   4   8    3.25    0.66
   0   4   8    3.03    0.59
   0  -4  -9   87.66    3.10
   0  -4  -9   91.94    3.10
   0   4   9   90.98    3.25
   0   4   9   90.83    3.03
   0  -4  -9   88.40    2.36
   0  -4  -9   90.46    2.51
   0   4   9   92.53    2.44
   0   4   9   95.56    2.58
   0  -4 -10   13.29    0.96
   0  -4 -10   11.45    0.89
   0   4  10   12.33    0.96
   0   4  10   11.52    0.89
   0  -4 -11   29.32    1.48
   0  -4 -11   24.96    1.55
   0   4  11   26.73    1.62
   0   4  11   25.40    1.48
   0  -4 -12   28.36    1.48
   0  -4 -12   27.77    1.70
   0   4  12   25.92    1.62
   0   4  12   27.84    1.48
   0  -4 -12   28.21    1.40
   0  -4 -12   28.80    1.26
   0   4  12   29.10    1.40
   0   4  12   28.43    1.26
   0  -4 -13   23.41    1.33
   0  -4 -13   24.00    1.55
   0   4  13   24.22    1.55
   0   4  13   26.14    1.48
   0  -4 -13   24.44    1.18
   0  -4 -13   24.74    1.26
   0   4  13   23.71    1.18
   0   4  13   22.82    1.26
   0  -4 -14    3.47    0.66
   0  -4 -14    4.50    0.96
   0   4  14    4.28    0.96
   0   4  14    3.77    0.81
   0  -4 -14    3.77    0.74
   0  -4 -14    3.10    0.59
   0   4  14    3.62    0.66
   0   4  14    2.66    0.74
   0  -4 -15   62.40    2.51
   0  -4 -15   59.82    2.66
   0   4  15   62.77    2.81
   0   4  15   61.52    2.51
   0  -4 -15   62.11    2.14
   0  -4 -15   62.40    1.99
   0   4  15   62.77    2.51
   0   4  15   60.04    1.99
   0  -4 -16   50.73    2.51
   0  -4 -16   57.97    2.44
   0   4  16   56.57    2.44
   0   4  16   56.05    2.66
   0   4  16   55.39    2.14
   0   4  16   53.76    1.92
   0  -4 -17    1.03    0.66
   0  -4 -17    0.30    0.96
   0   4  17    1.48    0.81
   0   4  17    1.70    0.96
   0  -4 -17    1.77    0.66
   0   4  17    1.99    0.74
   0   4  17    1.11    0.52
   0  -4 -18    0.00    0.66
   0  -4 -18    0.00    0.96
   0   4  18    1.18    1.03
   0   4  18    0.59    0.81
   0  -4 -18    0.37    0.59
   0  -4 -18    0.00    0.52
   0   4  18   -0.37    0.66
   0   4  18    0.30    0.52
   0  -4 -19   26.14    1.77
   0   4  19   27.99    1.99
   0  -4 -19   26.36    1.48
   0  -4 -19   28.51    1.33
   0   4  19   26.66    1.55
   0   4  19   25.85    1.40
   0  -4 -20    9.97    1.40
   0  -4 -20    8.71    1.26
   0   4  20    9.60    1.40
   0   4  20   11.15    1.40
   0  -4 -20    7.83    0.96
   0  -4 -20    8.49    0.89
   0   4  20   10.12    1.03
   0   4  20    8.71    0.96
   0  -4 -21    5.69    1.18
   0  -4 -21    7.83    1.40
   0   4  21    7.09    1.33
   0   4  21    7.46    1.33
   0  -4 -21    6.06    0.74
   0  -4 -21    6.50    0.96
   0   4  21    5.39    0.81
   0   4  21    4.73    0.81
   0  -4 -22    0.74    0.96
   0  -4 -22    1.03    1.11
   0   4  22    0.00    0.81
   0   4  22   -0.59    1.11
   0   4  22    0.22    0.66
   0  -4 -23    0.22    1.11
   0  -4 -23    0.89    1.18
   0   4  23   -0.22    0.59
   0  -4 -23    1.18    0.52
   0  -4 -23    0.74    0.66
   0   4  23    0.52    0.66
   0   4  23    1.03    0.59
   0   4  24    5.46    1.48
   0  -4 -24    6.65    0.89
   0  -4 -24    7.90    0.81
   0   4  24    6.57    0.96
   0   4  24    6.79    0.89
   0  -5  21    5.39    1.40
   0  -5  21    3.62    1.03
   0   5 -21    0.52    1.40
   0   5 -21    2.51    1.26
   0  -5  21    4.28    0.66
   0  -5  21    2.66    0.66
   0   5 -21    3.91    0.59
   0   5 -21    4.14    0.74
   0  -5  20    0.89    0.96
   0  -5  20   -0.66    0.89
   0   5 -20    1.62    1.11
   0   5 -20   -1.11    1.33
   0  -5  20    0.44    0.59
   0   5 -20    0.44    0.44
   0   5 -20   -0.22    0.44
   0  -5  19    1.62    1.11
   0   5 -19   -0.52    1.11
   0   5 -19    1.18    1.03
   0  -5  18   -0.15    1.03
   0  -5  18   -0.30    0.66
   0   5 -18    1.11    1.03
   0   5 -18    0.37    0.96
   0  -5  18    0.30    0.52
   0   5 -18    0.37    0.44
   0   5 -18   -0.52    0.44
   0  -5  17    4.21    1.26
   0  -5  17    3.54    1.03
   0   5 -17    3.54    1.26
   0   5 -17    1.92    1.11
   0  -5  17    4.43    0.59
   0  -5  17    3.91    0.74
   0   5 -17    3.69    0.59
   0   5 -17    3.77    0.59
   0  -5  16    9.53    1.33
   0  -5  16    8.64    1.11
   0   5 -16    9.75    1.40
   0   5 -16    8.12    1.18
   0  -5  16    8.71    0.74
   0  -5  16    7.75    0.89
   0   5 -16    9.60    0.81
   0   5 -16    7.83    0.74
   0  -5  15   15.95    1.55
   0  -5  15   14.55    1.33
   0   5 -15   17.80    1.70
   0   5 -15   17.06    1.40
   0  -5  15   15.36    0.89
   0  -5  15   17.35    1.03
   0   5 -15   18.24    0.96
   0   5 -15   16.32    0.96
   0  -5  14   29.91    1.99
   0  -5  14   34.27    1.77
   0   5 -14   28.43    1.99
   0   5 -14   30.87    1.77
   0  -5  14   30.72    1.18
   0  -5  14   29.61    1.33
   0   5 -14   30.35    1.26
   0   5 -14   29.10    1.18
   0  -5  13   31.09    1.70
   0  -5  13   28.65    1.92
   0   5 -13   29.69    1.70
   0   5 -13   27.69    1.85
   0  -5  13   28.51    1.11
   0  -5  13   27.40    1.18
   0   5 -13   29.47    1.18
   0   5 -13   29.17    1.18
   0  -5  12    4.95    0.81
   0  -5  12    6.20    1.03
   0   5 -12    5.61    0.89
   0   5 -12    6.28    1.11
   0  -5  12    5.91    0.66
   0  -5  12    7.90    0.66
   0   5 -12    7.31    0.66
   0   5 -12    6.50    0.66
   0  -5  11   24.00    1.62
   0  -5  11   27.32    1.48
   0   5 -11   23.85    1.70
   0   5 -11   27.18    1.55
   0  -5  11   24.15    1.03
   0  -5  11   24.81    0.96
   0   5 -11   26.36    1.11
   0   5 -11   22.97    0.96
   0  -5  10   79.02    3.18
   0  -5  10   79.98    2.88
   0   5 -10   81.16    2.95
   0   5 -10   80.05    3.18
   0  -5  10   78.87    1.99
   0  -5  10   83.60    1.99
   0   5 -10   79.46    2.07
   0  -5   9  113.80    3.77
   0  -5   9  124.29    4.36
   0   5  -9  124.14    4.28
   0   5  -9  125.69    4.06
   0  -5   9  118.38    2.66
   0  -5   9  121.92    2.66
   0   5  -9  123.03    2.81
   0   5  -9  126.94    2.73
   0  -5   8  261.64    7.98
   0  -5   8  261.64    5.10
   0  -5   8  275.16    5.32
   0   5  -8  277.45    5.39
   0   5  -8  280.03    5.46
   0  -5   7  100.14    3.32
   0  -5   7  100.06    3.54
   0   5  -7  102.28    3.62
   0   5  -7  104.35    3.40
   0  -5   7  100.14    2.22
   0  -5   7   98.07    2.22
   0   5  -7  101.69    2.29
   0   5  -7  102.06    2.29
   0  -5   6  151.61    4.58
   0  -5   6  152.35    4.87
   0   5  -6  149.39    4.80
   0   5  -6  149.84    4.50
   0  -5   6  146.14    3.03
   0  -5   6  146.29    3.03
   0   5  -6  147.10    3.10
   0   5  -6  149.84    3.03
   0  -5   5    0.74    0.74
   0  -5   5    0.81    0.52
   0   5  -5    0.74    0.81
   0   5  -5    0.15    0.44
   0  -5   5   -0.59    0.37
   0  -5   5    0.44    0.44
   0   5  -5    0.44    0.37
   0   5  -5    0.07    0.44
   0  -5   4   14.25    1.11
   0  -5   4   16.47    0.96
   0   5  -4   15.21    1.18
   0   5  -4   15.73    0.89
   0  -5   4   14.70    0.66
   0  -5   4   14.18    0.66
   0   5  -4   15.73    0.74
   0   5  -4   13.51    0.74
   0  -5   3   90.98    3.03
   0  -5   3   94.53    2.95
   0   5  -3   93.05    3.18
   0   5  -3   92.75    2.88
   0  -5   3   90.61    1.99
   0  -5   3   90.02    1.99
   0   5  -3   86.62    1.99
   0   5  -3   87.21    1.99
   0  -5   2  876.57   23.34
   0  -5   2  873.62   23.41
   0   5  -2  864.76   23.19
   0   5  -2  852.94   22.75
   0  -5   2  858.11   15.43
   0  -5   2  843.34   15.21
   0   5  -2  839.65   15.14
   0   5  -2  856.64   15.43
   0  -5   1   85.00    2.66
   0  -5   1   88.54    2.88
   0   5  -1   88.77    2.81
   0   5  -1   88.47    2.88
   0  -5   1   84.11    1.99
   0  -5   1   83.97    1.92
   0   5  -1   84.70    1.99
   0   5  -1   79.24    1.85
   0  -5   0  960.02   25.55
   0  -5   0  982.18   26.07
   0   5   0  944.51   25.18
   0   5   0  960.76   25.48
   0  -5   0  958.55   17.28
   0  -5   0  976.27   17.65
   0   5   0  976.27   17.58
   0   5   0  959.28   17.35
   0  -5  -1   74.29    2.36
   0  -5  -1   76.73    2.51
   0   5   1   73.11    2.36
   0   5   1   76.43    2.51
   0  -5  -1   71.63    1.77
   0  -5  -1   76.06    1.92
   0   5   1   74.59    1.85
   0   5   1   74.96    1.92
   0  -5  -2  813.80   21.64
   0  -5  -2  815.28   21.71
   0   5   2  835.22   22.30
   0   5   2  813.80   21.71
   0  -5  -2  768.02   14.10
   0  -5  -2  771.71   14.10
   0   5   2  808.63   14.84
   0   5   2  777.62   14.18
   0  -5  -3  796.08   21.19
   0  -5  -3  776.88   20.75
   0   5   3  787.22   21.05
   0   5   3  785.74   20.97
   0  -5  -3  774.66   14.25
   0  -5  -3  756.20   13.88
   0   5   3  775.40   14.25
   0   5   3  788.70   14.55
   0  -5  -4   18.76    0.96
   0  -5  -4   19.27    1.11
   0   5   4   17.06    1.11
   0   5   4   17.50    0.96
   0  -5  -4   18.09    0.89
   0  -5  -4   18.83    1.03
   0   5   4   17.43    0.96
   0   5   4   14.84    0.96
   0  -5  -5    2.73    0.74
   0  -5  -5    1.48    0.59
   0   5   5    3.03    0.59
   0   5   5    2.22    0.81
   0  -5  -5    2.14    0.59
   0  -5  -5    2.22    0.66
   0   5   5    2.36    0.66
   0   5   5    2.73    0.66
   0  -5  -6   27.18    1.40
   0  -5  -6   29.47    1.33
   0   5   6   28.28    1.26
   0   5   6   28.51    1.48
   0  -5  -6   27.55    1.18
   0  -5  -6   28.21    1.26
   0   5   6   29.32    1.18
   0   5   6   27.84    1.26
   0  -5  -7   23.78    1.26
   0  -5  -7   21.42    1.33
   0   5   7   20.75    1.33
   0   5   7   23.85    1.26
   0  -5  -7   23.34    1.11
   0  -5  -7   23.56    1.18
   0   5   7   21.64    1.11
   0   5   7   20.60    1.03
   0  -5  -8  261.57    7.46
   0  -5  -8  255.14    7.46
   0   5   8  248.05    7.09
   0   5   8  261.72    7.68
   0  -5  -8  256.10    5.46
   0  -5  -8  255.51    5.32
   0   5   8  244.51    5.17
   0   5   8  257.95    5.46
   0   5   9  156.48    4.80
   0  -5  -9  158.63    3.62
   0  -5  -9  166.31    3.91
   0   5   9  164.90    3.77
   0   5   9  162.10    3.84
   0  -5 -10   28.95    1.48
   0   5  10   28.06    1.62
   0  -5 -11   25.77    1.40
   0  -5 -11   25.63    1.55
   0  -5 -11   26.51    1.33
   0  -5 -11   24.81    1.18
   0   5  11   28.21    1.40
   0   5  11   26.22    1.26
   0  -5 -12  268.66    7.90
   0  -5 -12  253.30    7.61
   0   5  12  259.28    7.83
   0   5  12  249.09    7.31
   0  -5 -12  251.16    5.54
   0  -5 -12  256.62    5.54
   0   5  12  257.36    5.54
   0   5  12  247.98    5.54
   0  -5 -13  134.55    4.36
   0  -5 -13  142.53    4.73
   0   5  13  140.46    4.80
   0   5  13  139.50    4.50
   0  -5 -13  138.76    3.40
   0  -5 -13  141.57    3.62
   0   5  13  149.84    3.77
   0   5  13  142.08    3.54
   0  -5 -14   52.73    2.22
   0  -5 -14   48.52    2.29
   0   5  14   48.07    2.14
   0   5  14   47.63    2.36
   0  -5 -14   51.69    1.92
   0  -5 -14   50.44    1.77
   0   5  14   46.01    1.85
   0   5  14   52.43    1.85
   0  -5 -15   10.93    1.33
   0  -5 -15   12.33    1.03
   0   5  15   12.04    1.33
   0   5  15   12.04    1.18
   0  -5 -15    8.42    0.89
   0  -5 -15   10.63    0.89
   0   5  15   12.63    0.96
   0   5  15   10.93    1.03
   0  -5 -16    5.46    0.81
   0  -5 -16    6.79    1.18
   0   5  16    6.42    1.03
   0   5  16    4.95    1.11
   0  -5 -16    3.62    0.74
   0  -5 -16    6.35    0.81
   0   5  16    6.13    0.81
   0   5  16    5.83    0.89
   0  -5 -17   51.25    2.51
   0  -5 -17   50.36    2.29
   0   5  17   53.76    2.66
   0   5  17   48.59    2.36
   0  -5 -17   46.75    1.85
   0  -5 -17   50.96    1.99
   0   5  17   49.63    1.92
   0   5  17   51.99    2.07
   0  -5 -18   18.76    1.40
   0  -5 -18   18.61    1.62
   0   5  18   15.80    1.55
   0   5  18   19.87    1.62
   0  -5 -18   17.28    1.18
   0  -5 -18   19.05    1.33
   0   5  18   17.43    1.33
   0   5  18   16.02    1.18
   0  -5 -19    9.08    1.18
   0  -5 -19   12.33    1.48
   0   5  19   10.12    1.33
   0   5  19   11.52    1.40
   0  -5 -19   11.37    1.11
   0  -5 -19   13.44    1.03
   0   5  19    9.60    0.96
   0   5  19   12.04    1.18
   0  -5 -20    1.03    1.03
   0  -5 -20    0.89    0.89
   0   5  20    0.44    0.96
   0   5  20    2.22    0.96
   0  -5 -20    1.18    0.66
   0  -5 -20    0.89    0.59
   0   5  20    0.59    0.66
   0   5  20    0.81    0.59
   0  -5 -21   18.31    1.70
   0  -5 -21   16.10    1.62
   0   5  21   16.17    1.62
   0   5  21   16.84    1.77
   0  -5 -22   -0.52    1.03
   0  -5 -22    1.77    1.03
   0   5  22    0.81    0.89
   0   5  22    0.37    1.11
   0  -5 -22   -0.44    0.59
   0  -5 -22    0.22    0.44
   0   5  22    0.37    0.59
   0   5  22    0.37    0.59
   0  -5 -23    1.40    1.26
   0  -5 -23    2.14    1.26
   0   5  23    1.77    0.81
   0   5  23    1.77    1.18
   0  -5 -23    0.96    0.66
   0  -5 -23    1.33    0.59
   0   5  23    1.11    0.59
   0   5  23    1.26    0.59
   0  -5 -24    1.55    1.26
   0   5  24    2.36    1.26
   0  -5 -24    2.51    0.66
   0  -5 -24    3.62    0.66
   0   5  24    2.14    0.74
   0   5  24    1.92    0.66
   0  -6  21    0.74    0.81
   0  -6  21   -1.48    1.03
   0   6 -21   -0.07    1.11
   0   6 -21    0.44    1.03
   0  -6  20    1.11    1.03
   0  -6  20    0.81    0.96
   0   6 -20    1.03    1.26
   0   6 -20   -0.30    1.11
   0  -6  20    0.30    0.44
   0   6 -20    0.22    0.37
   0  -6  19    0.52    0.89
   0   6 -19    1.40    1.11
   0   6 -19    0.89    1.48
   0  -6  19    0.15    0.52
   0  -6  19    1.11    0.52
   0   6 -19    2.29    0.59
   0   6 -19    1.03    0.44
   0  -6  18    3.62    1.26
   0  -6  18    4.21    0.96
   0   6 -18    1.40    1.26
   0   6 -18    3.77    1.11
   0  -6  18    3.77    0.59
   0  -6  18    3.10    0.59
   0   6 -18    2.88    0.52
   0   6 -18    4.06    0.66
   0  -6  17   29.54    1.92
   0  -6  17   32.79    2.36
   0   6 -17   27.84    2.22
   0   6 -17   25.63    2.07
   0  -6  17   30.72    1.33
   0  -6  17   29.54    1.18
   0   6 -17   30.13    1.33
   0   6 -17   31.31    1.26
   0  -6  16    3.69    0.59
   0  -6  16    3.47    0.66
   0   6 -16    3.40    0.59
   0   6 -16    3.40    0.59
   0  -6  15   14.40    1.55
   0  -6  15   11.45    1.18
   0   6 -15   14.25    1.62
   0   6 -15   13.37    1.33
   0  -6  15   12.48    0.89
   0  -6  15   13.51    0.81
   0   6 -15   12.04    0.81
   0   6 -15   11.89    0.89
   0  -6  14    6.57    1.11
   0  -6  14    5.24    0.89
   0   6 -14    6.65    0.96
   0   6 -14    5.61    1.18
   0  -6  14    6.42    0.59
   0  -6  14    6.42    0.74
   0   6 -14    5.83    0.66
   0   6 -14    5.76    0.66
   0  -6  13   21.19    1.70
   0  -6  13   25.63    1.55
   0   6 -13   28.51    1.70
   0   6 -13   25.63    1.92
   0  -6  13   28.65    1.11
   0  -6  13   27.55    1.18
   0   6 -13   29.47    1.26
   0   6 -13   28.21    1.18
   0  -6  12   10.26    1.03
   0  -6  12   11.82    1.26
   0   6 -12    8.42    1.18
   0   6 -12   10.19    1.03
   0  -6  12   12.41    0.74
   0  -6  12   11.96    0.81
   0   6 -12   12.92    0.89
   0   6 -12   12.41    0.74
   0  -6  11    1.92    0.81
   0  -6  11    0.66    0.59
   0   6 -11    0.52    0.59
   0   6 -11   -0.22    0.81
   0  -6  11    0.89    0.44
   0  -6  11    1.11    0.44
   0   6 -11   -0.22    0.37
   0   6 -11    0.81    0.52
   0  -6  10   48.81    2.07
   0  -6  10   42.98    2.22
   0   6 -10   48.96    2.07
   0   6 -10   45.42    2.29
   0  -6  10   45.71    1.40
   0  -6  10   46.97    1.33
   0   6 -10   46.45    1.48
   0   6 -10   44.09    1.33
   0  -6   9   84.41    3.25
   0  -6   9   88.54    3.10
   0   6  -9   88.99    3.47
   0   6  -9   83.08    2.95
   0  -6   9   86.55    2.07
   0  -6   9   88.54    2.07
   0   6  -9   91.20    2.22
   0   6  -9   86.33    2.07
   0  -6   8    6.72    1.03
   0  -6   8    9.82    0.89
   0   6  -8    8.27    1.11
   0   6  -8    7.61    0.81
   0  -6   8    7.16    0.59
   0  -6   8    7.98    0.59
   0   6  -8    8.79    0.66
   0   6  -8    8.34    0.66
   0  -6   7   79.02    3.03
   0   6  -7   78.87    2.73
   0  -6   7   72.89    1.77
   0  -6   7   76.58    1.85
   0   6  -7   77.17    1.92
   0   6  -7   77.32    1.85
   0  -6   6   86.33    2.95
   0   6  -6   87.07    3.25
   0  -6   6   87.29    1.99
   0  -6   6   87.81    1.99
   0   6  -6   92.38    2.14
   0   6  -6   87.58    2.07
   0  -6   5   67.87    2.44
   0  -6   5   70.45    2.66
   0   6  -5   62.03    2.22
   0   6  -5   68.46    2.73
   0   6  -5   69.42    1.77
   0   6  -5   68.60    1.70
   0  -6   4    6.42    0.89
   0  -6   4    8.05    0.81
   0   6  -4    6.50    0.96
   0   6  -4    7.68    0.74
   0  -6   4    7.09    0.59
   0  -6   4    7.68    0.59
   0   6  -4    6.79    0.59
   0   6  -4    6.57    0.59
   0  -6   3   34.41    1.62
   0  -6   3   34.49    1.48
   0   6  -3   30.20    1.33
   0   6  -3   33.08    1.62
   0  -6   3   29.02    1.03
   0  -6   3   30.28    1.03
   0   6  -3   29.98    1.03
   0   6  -3   30.35    1.03
   0  -6   2  251.53    7.09
   0  -6   2  241.11    6.94
   0   6  -2  251.38    7.31
   0   6  -2  241.85    6.87
   0  -6   2  247.46    4.87
   0  -6   2  252.63    4.95
   0   6  -2  252.04    4.95
   0   6  -2  256.10    5.02
   0  -6   1  522.40   14.18
   0  -6   1  514.35   14.03
   0   6  -1  527.42   14.25
   0   6  -1  524.54   14.40
   0   6  -1  549.13   10.26
   0   6  -1  543.89   10.12
   0  -6   0    5.02    0.59
   0  -6   0    4.80    0.74
   0   6   0    4.87    0.66
   0   6   0    5.10    0.74
   0  -6   0    4.50    0.59
   0  -6   0    4.73    0.59
   0   6   0    4.87    0.59
   0   6   0    4.06    0.59
   0  -6  -1    3.62    0.59
   0  -6  -1    2.44    0.59
   0   6   1    2.22    0.66
   0   6   1    1.92    0.59
   0  -6  -1    2.22    0.52
   0  -6  -1    1.62    0.59
   0   6   1    1.40    0.59
   0   6   1    2.58    0.59
   0  -6  -2   13.59    0.89
   0  -6  -2   16.84    0.96
   0   6   2   15.06    1.03
   0   6   2   14.62    0.96
   0  -6  -2   14.10    0.89
   0  -6  -2   12.92    0.81
   0   6   2   13.74    0.89
   0   6   2   13.51    0.81
   0  -6  -3  360.60    9.90
   0  -6  -3  353.51    9.75
   0   6   3  361.71   10.04
   0   6   3  359.79    9.97
   0  -6  -3  349.45    6.87
   0  -6  -3  345.68    6.72
   0   6   3  347.60    6.87
   0   6   3  358.09    7.02
   0  -6  -4   66.98    2.36
   0  -6  -4   63.66    2.22
   0   6   4   63.58    2.36
   0   6   4   63.51    2.22
   0  -6  -4   65.65    1.85
   0  -6  -4   65.43    1.92
   0   6   4   65.43    1.85
   0   6   4   62.92    1.92
   0  -6  -5  211.13    6.06
   0  -6  -5  200.72    5.91
   0   6   5  216.30    6.20
   0   6   5  219.11    6.42
   0  -6  -5  209.06    4.43
   0  -6  -5  206.48    4.50
   0   6   5  205.30    4.50
   0   6   5  201.24    4.36
   0  -6  -6   71.41    2.51
   0  -6  -6   63.44    2.36
   0   6   6   67.87    2.58
   0   6   6   64.47    2.29
   0  -6  -6   67.87    1.92
   0  -6  -6   69.20    2.07
   0   6   6   65.06    1.99
   0   6   6   68.60    1.99
   0  -6  -7  525.65   14.33
   0  -6  -7  549.28   15.06
   0   6   7  561.76   15.51
   0   6   7  533.85   14.55
   0  -6  -7  551.50   10.56
   0  -6  -7  548.32   10.63
   0   6   7  538.42   10.41
   0   6   7  541.90   10.41
   0  -6  -8    2.44    0.81
   0  -6  -8    3.91    0.96
   0   6   8    4.14    0.81
   0   6   8    1.40    0.96
   0  -6  -8    3.03    0.74
   0  -6  -8    2.81    0.66
   0   6   8    3.03    0.74
   0   6   8    4.50    0.74
   0  -6 -10  104.79    3.47
   0  -6 -10  111.21    3.84
   0   6  10  117.05    4.06
   0   6  10  111.95    3.69
   0  -6 -10  112.47    3.03
   0  -6 -10  107.15    2.81
   0   6  10  109.89    2.88
   0   6  10  111.58    3.03
   0  -6 -11   86.18    3.25
   0  -6 -11   86.92    3.10
   0   6  11   87.07    3.10
   0   6  11   86.70    3.32
   0  -6 -11   86.03    2.58
   0  -6 -11   85.89    2.44
   0   6  11   86.11    2.51
   0   6  11   86.03    2.58
   0  -6 -12   70.89    2.73
   0  -6 -12   74.51    2.95
   0   6  12   74.88    2.81
   0   6  12   72.15    2.95
   0  -6 -12   74.59    2.29
   0  -6 -12   77.10    2.44
   0   6  12   71.41    2.22
   0   6  12   77.98    2.51
   0  -6 -13    6.50    1.18
   0  -6 -13    4.73    0.81
   0   6  13    3.54    0.96
   0   6  13    5.83    1.03
   0  -6 -13    5.10    0.74
   0  -6 -13    5.61    0.81
   0   6  13    4.80    0.81
   0   6  13    7.24    0.81
   0  -6 -14  161.95    5.32
   0  -6 -14  169.55    5.39
   0  -6 -14  155.82    3.77
   0  -6 -14  158.92    4.06
   0   6  14  157.74    4.06
   0   6  14  162.83    3.99
   0  -6 -15   43.27    2.07
   0  -6 -15   41.58    2.22
   0   6  15   38.84    1.99
   0   6  15   39.88    2.22
   0  -6 -15   40.76    1.77
   0  -6 -15   39.43    1.62
   0   6  15   41.72    1.85
   0   6  15   41.65    1.70
   0  -6 -16   99.25    3.77
   0  -6 -16   92.61    3.40
   0  -6 -16   98.88    2.95
   0  -6 -16   97.04    2.81
   0   6  16  103.76    2.95
   0   6  16   94.67    2.95
   0  -6 -17   81.82    3.10
   0  -6 -17   83.15    3.40
   0   6  17   84.33    3.25
   0   6  17   80.42    3.47
   0  -6 -17   85.81    2.73
   0  -6 -17   87.51    2.66
   0   6  17   86.62    2.66
   0   6  17   82.19    2.73
   0  -6 -18   33.90    2.14
   0   6  18   32.64    1.99
   0  -6 -18   36.92    1.62
   0  -6 -18   35.67    1.70
   0   6  18   35.45    1.62
   0   6  18   33.53    1.70
   0  -6 -19   61.07    2.81
   0  -6 -19   54.57    2.73
   0   6  19   53.17    2.58
   0   6  19   52.43    2.81
   0  -6 -19   57.01    2.07
   0  -6 -19   59.23    2.29
   0   6  19   60.78    2.29
   0   6  19   53.39    1.99
   0  -6 -20   12.41    1.48
   0  -6 -20    9.97    1.48
   0   6  20   10.04    1.48
   0   6  20   13.88    1.48
   0  -6 -20   10.34    1.40
   0   6  20   12.04    1.11
   0  -6 -21    1.18    1.03
   0  -6 -21    4.50    1.18
   0   6  21    3.40    1.11
   0   6  21    4.06    1.11
   0  -6 -21    3.62    0.66
   0  -6 -21    4.36    0.81
   0   6  21    2.88    0.74
   0   6  21    3.40    0.81
   0  -6 -22    1.77    1.11
   0  -6 -22    3.62    1.26
   0   6  22    3.99    1.18
   0   6  22    3.54    1.03
   0  -6 -22    3.62    0.74
   0  -6 -22    2.66    0.66
   0   6  22    2.95    0.66
   0   6  22    2.14    0.81
   0  -6 -23    2.58    1.26
   0  -6 -23    1.48    1.18
   0   6  23    1.48    1.11
   0   6  23    0.37    0.81
   0  -6 -23    1.62    0.59
   0  -6 -23    2.51    0.74
   0   6  23    1.77    0.66
   0   6  23    1.92    0.59
   0  -7  20   -0.81    1.03
   0  -7  20   -0.22    0.74
   0   7 -20   -0.44    0.96
   0   7 -20    0.59    1.11
   0  -7  19    1.92    1.03
   0  -7  19    1.40    1.26
   0   7 -19    0.22    1.18
   0   7 -19    0.89    1.03
   0  -7  19    0.74    0.44
   0  -7  19    0.81    0.44
   0   7 -19    0.37    0.37
   0   7 -19    0.37    0.44
   0  -7  18   -0.59    1.33
   0   7 -18    0.30    1.11
   0   7 -18    2.51    1.33
   0  -7  18    0.15    0.44
   0  -7  18    0.37    0.44
   0   7 -18    0.00    0.44
   0   7 -18    0.37    0.37
   0  -7  17   -1.48    1.11
   0  -7  17    0.07    0.81
   0   7 -17    0.07    0.96
   0   7 -17    0.22    1.11
   0  -7  17   -0.52    0.37
   0  -7  17    0.52    0.44
   0   7 -17   -0.30    0.44
   0   7 -17   -0.37    0.37
   0  -7  16    3.10    1.26
   0  -7  16    5.10    1.03
   0   7 -16    2.81    1.11
   0   7 -16    2.58    1.11
   0  -7  16    3.03    0.52
   0  -7  16    4.28    0.59
   0   7 -16    2.95    0.52
   0   7 -16    3.84    0.59
   0  -7  15    0.96    0.81
   0   7 -15    0.07    1.11
   0  -7  15    1.92    0.44
   0  -7  15    0.66    0.52
   0   7 -15    1.62    0.52
   0   7 -15    1.48    0.44
   0  -7  14    5.91    1.18
   0  -7  14    6.28    0.96
   0   7 -14    6.06    1.03
   0   7 -14    5.02    1.18
   0  -7  14    3.77    0.59
   0  -7  14    5.46    0.59
   0   7 -14    5.83    0.66
   0   7 -14    4.43    0.59
   0  -7  13    2.36    0.74
   0  -7  13    0.96    0.89
   0   7 -13    1.70    0.96
   0   7 -13    2.44    0.74
   0  -7  13    1.26    0.52
   0  -7  13    2.51    0.52
   0   7 -13    1.77    0.52
   0   7 -13    2.36    0.59
   0  -7  12   45.86    2.14
   0  -7  12   39.58    2.22
   0   7 -12   45.42    2.51
   0   7 -12   42.76    2.07
   0  -7  12   48.30    1.48
   0  -7  12   46.75    1.40
   0   7 -12   45.05    1.40
   0   7 -12   45.86    1.55
   0  -7  11  122.37    4.43
   0  -7  11  124.43    4.21
   0   7 -11  126.58    4.58
   0   7 -11  120.67    4.06
   0  -7  11  121.85    2.73
   0  -7  11  119.49    2.73
   0   7 -11  126.58    2.95
   0   7 -11  123.03    2.73
   0  -7  10    6.57    0.89
   0  -7  10    7.38    1.11
   0   7 -10    5.98    0.81
   0   7 -10    6.35    1.11
   0  -7  10    6.72    0.59
   0  -7  10    6.42    0.59
   0   7 -10    5.83    0.59
   0   7 -10    5.46    0.66
   0  -7   9    0.07    0.74
   0  -7   9    0.81    0.59
   0   7  -9    0.74    0.81
   0   7  -9   -0.30    0.52
   0  -7   9    0.22    0.37
   0  -7   9   -0.44    0.37
   0   7  -9    0.44    0.52
   0   7  -9    0.15    0.37
   0  -7   8   39.14    2.07
   0  -7   8   36.48    1.70
   0   7  -8   38.62    1.77
   0   7  -8   35.15    1.99
   0  -7   8   37.00    1.18
   0  -7   8   37.15    1.18
   0   7  -8   37.00    1.33
   0   7  -8   39.43    1.26
   0  -7   7    6.57    0.96
   0  -7   7    6.57    0.81
   0   7  -7    7.75    1.18
   0   7  -7    7.61    0.81
   0  -7   7    6.06    0.59
   0  -7   7    6.06    0.59
   0   7  -7    6.57    0.59
   0   7  -7    5.83    0.66
   0  -7   6    7.24    0.81
   0  -7   6    9.30    1.03
   0   7  -6    7.75    1.11
   0   7  -6   10.49    0.89
   0  -7   6   10.26    0.66
   0  -7   6    9.08    0.66
   0   7  -6    9.01    0.74
   0   7  -6    9.08    0.66
   0   7  -5   12.18    0.81
   0   7  -5   11.37    0.74
   0  -7   4   22.38    1.40
   0  -7   4   20.97    1.18
   0   7  -4   21.71    1.48
   0   7  -4   24.00    1.26
   0   7  -4   23.56    0.96
   0   7  -4   20.90    0.96
   0  -7   3  129.53    4.14
   0  -7   3  133.00    4.06
   0   7  -3  137.95    4.50
   0   7  -3  128.42    3.99
   0  -7   3  134.55    2.95
   0  -7   3  137.87    3.03
   0  -7   2   24.37    1.18
   0  -7   2   23.93    1.33
   0   7  -2   24.15    1.26
   0   7  -2   24.67    1.48
   0  -7   2   25.40    1.03
   0  -7   2   24.30    1.03
   0   7  -2   24.15    1.03
   0   7  -2   24.74    1.03
   0  -7   1    9.75    0.96
   0  -7   1    9.90    0.81
   0   7  -1    7.90    0.96
   0   7  -1    8.34    0.81
   0  -7   1    9.38    0.74
   0  -7   1    8.57    0.74
   0   7  -1    8.57    0.74
   0   7  -1    9.67    0.74
   0  -7   0  108.19    3.40
   0  -7   0  104.57    3.32
   0   7   0  106.19    3.40
   0   7   0  102.65    3.40
   0  -7   0  104.94    2.51
   0  -7   0  103.83    2.51
   0   7   0  109.29    2.58
   0   7   0  105.75    2.58
   0  -7  -1  214.97    6.20
   0  -7  -1  210.61    6.06
   0   7   1  212.76    6.20
   0   7   1  206.63    5.98
   0  -7  -1  210.98    4.43
   0  -7  -1  205.15    4.28
   0   7   1  209.21    4.43
   0   7   1  211.50    4.43
   0  -7  -2   48.52    1.85
   0  -7  -2   50.73    1.92
   0   7   2   48.15    1.92
   0   7   2   47.93    1.92
   0  -7  -2   47.26    1.55
   0  -7  -2   49.11    1.55
   0   7   2   50.66    1.62
   0   7   2   50.44    1.62
   0  -7  -3    1.99    0.59
   0  -7  -3    2.44    0.59
   0   7   3    2.44    0.74
   0   7   3    1.55    0.59
   0  -7  -3    2.14    0.52
   0  -7  -3    1.99    0.66
   0   7   3    1.92    0.59
   0   7   3    1.26    0.59
   0  -7  -4    0.52    0.59
   0  -7  -4    1.18    0.59
   0   7   4    0.00    0.59
   0   7   4    1.18    0.74
   0  -7  -4    0.30    0.59
   0  -7  -4    0.07    0.52
   0   7   4    1.40    0.59
   0   7   4    0.96    0.59
   0  -7  -5   34.93    1.62
   0  -7  -5   31.16    1.40
   0   7   5   27.62    1.55
   0   7   5   31.61    1.48
   0  -7  -5   31.98    1.26
   0  -7  -5   29.83    1.40
   0   7   5   33.01    1.33
   0   7   5   31.02    1.40
   0  -7  -6  125.84    3.91
   0  -7  -6  126.80    4.06
   0   7   6  123.62    3.91
   0   7   6  122.00    4.06
   0  -7  -6  126.72    3.10
   0  -7  -6  124.73    3.18
   0   7   6  128.35    3.25
   0   7   6  122.59    3.03
   0  -7  -7   12.41    1.11
   0   7   7   11.74    0.96
   0  -7  -7   12.85    1.03
   0   7   7   10.12    0.96
   0  -7  -8   14.62    1.03
   0   7   8   14.33    1.18
   0  -7  -9   14.18    1.18
   0  -7  -9   12.26    1.26
   0   7   9   12.18    1.33
   0   7   9   11.30    1.03
   0  -7  -9   13.44    1.11
   0  -7  -9   13.96    0.96
   0   7   9   14.47    1.11
   0   7   9   15.21    1.03
   0  -7 -10   38.84    1.85
   0  -7 -10   39.80    1.99
   0   7  10   36.33    1.70
   0   7  10   34.86    1.99
   0   7  10   37.15    1.55
   0   7  10   36.19    1.62
   0  -7 -11   75.55    2.95
   0  -7 -11   74.59    2.81
   0   7  11   75.99    3.10
   0   7  11   76.88    2.81
   0  -7 -11   78.87    2.36
   0  -7 -11   74.96    2.36
   0   7  11   73.40    2.36
   0   7  11   75.92    2.29
   0  -7 -12   22.15    1.55
   0  -7 -12   22.38    1.40
   0   7  12   21.12    1.62
   0   7  12   22.97    1.48
   0  -7 -12   21.05    1.33
   0  -7 -12   22.75    1.26
   0   7  12   21.42    1.26
   0   7  12   20.90    1.33
   0  -7 -13    0.00    0.89
   0  -7 -13    0.81    0.66
   0   7  13   -0.37    0.74
   0   7  13    0.22    0.89
   0  -7 -13   -0.52    0.52
   0  -7 -13   -0.07    0.59
   0   7  13    0.59    0.66
   0   7  13    0.74    0.52
   0  -7 -14   24.59    1.77
   0  -7 -14   25.77    1.70
   0   7  14   27.55    1.92
   0   7  14   28.65    1.70
   0  -7 -14   28.43    1.40
   0  -7 -14   26.88    1.48
   0   7  14   24.30    1.33
   0   7  14   26.88    1.55
   0  -7 -15   26.36    1.92
   0  -7 -15   22.08    1.62
   0   7  15   26.22    1.70
   0   7  15   27.10    1.99
   0  -7 -15   25.70    1.33
   0  -7 -15   27.69    1.55
   0  -7 -16   13.66    1.33
   0  -7 -16   12.55    1.48
   0   7  16   12.55    1.40
   0   7  16   13.00    1.33
   0  -7 -16   13.07    1.03
   0  -7 -16   11.22    1.11
   0   7  16    9.38    0.96
   0   7  16   12.85    1.18
   0  -7 -17    4.43    1.26
   0  -7 -17    2.14    0.81
   0   7  17    2.29    1.03
   0   7  17    2.36    1.03
   0  -7 -17    1.70    0.66
   0  -7 -17    2.88    0.81
   0   7  17    1.48    0.81
   0   7  17    2.81    0.89
   0  -7 -18  134.99    3.62
   0  -7 -18  134.55    3.77
   0   7  18  136.54    3.84
   0   7  18  137.28    3.62
   0  -7 -19   13.66    1.40
   0  -7 -19   14.77    1.62
   0   7  19   16.10    1.55
   0   7  19   14.10    1.55
   0  -7 -19   11.45    1.26
   0   7  19   13.88    1.11
   0  -7 -20    7.24    1.33
   0  -7 -20    9.08    1.33
   0   7  20    8.71    1.48
   0   7  20    5.69    1.26
   0  -7 -20    7.68    1.03
   0  -7 -20    7.61    0.89
   0   7  20    7.98    1.03
   0   7  20    7.75    0.96
   0   7  21   49.63    2.66
   0   7  21   55.31    3.18
   0  -7 -21   48.89    1.99
   0  -7 -21   51.55    1.99
   0   7  21   50.81    2.14
   0   7  21   46.60    1.85
   0  -7 -22   -0.37    1.03
   0  -7 -22    0.07    1.18
   0   7  22    0.96    1.11
   0   7  22    0.30    0.89
   0  -7 -22    2.14    0.66
   0  -7 -22    1.33    0.59
   0   7  22    0.89    0.66
   0   7  22    1.40    0.59
   0  -7 -23   -0.96    1.11
   0  -7 -23   -0.44    1.26
   0   7  23   -0.07    0.74
   0   7  23   -0.44    1.11
   0  -7 -23    0.52    0.59
   0  -7 -23   -0.07    0.44
   0   7  23   -0.22    0.59
   0   7  23    0.07    0.52
   0  -8  20    1.18    0.81
   0  -8  20    0.30    0.89
   0   8 -20   -0.44    0.89
   0  -8  19   -0.30    1.03
   0  -8  19   -1.11    1.03
   0   8 -19   -0.96    1.18
   0   8 -19    1.26    1.11
   0   8 -18    1.03    1.33
   0   8 -18    4.06    1.40
   0  -8  18    5.98    0.59
   0  -8  18    5.76    0.59
   0   8 -18    5.24    0.52
   0   8 -18    6.65    0.66
   0  -8  17    4.73    1.77
   0  -8  17    5.32    1.26
   0   8 -17    5.69    1.33
   0   8 -17    2.58    1.33
   0  -8  17    7.61    0.66
   0  -8  17    8.12    0.66
   0  -8  16    0.00    1.18
   0  -8  16   -0.30    0.74
   0   8 -16    1.18    0.96
   0   8 -16   -0.52    1.03
   0  -8  16   -0.30    0.37
   0  -8  16    0.15    0.37
   0   8 -16    0.74    0.37
   0   8 -16    0.52    0.44
   0  -8  15    9.75    1.55
   0  -8  15    5.54    1.03
   0   8 -15    4.95    1.18
   0   8 -15    7.75    1.33
   0  -8  15    5.46    0.59
   0  -8  15    6.57    0.59
   0   8 -15    6.50    0.59
   0   8 -15    5.69    0.59
   0  -8  14   -0.07    0.66
   0   8 -14   -0.07    0.96
   0   8 -14    0.07    0.81
   0  -8  14    0.30    0.44
   0  -8  14    0.66    0.44
   0   8 -14   -0.30    0.37
   0   8 -14   -0.15    0.44
   0  -8  13    6.79    1.26
   0  -8  13    5.17    0.96
   0   8 -13    5.10    1.18
   0   8 -13    5.46    0.96
   0  -8  13    3.84    0.52
   0  -8  13    5.10    0.59
   0   8 -13    4.87    0.59
   0   8 -13    5.46    0.66
   0  -8  12    4.43    0.89
   0  -8  12    3.18    0.96
   0   8 -12    3.10    1.03
   0   8 -12    3.69    0.81
   0  -8  12    2.81    0.52
   0  -8  12    3.77    0.52
   0   8 -12    2.73    0.52
   0   8 -12    3.25    0.59
   0  -8  11   57.97    2.73
   0  -8  11   58.12    2.44
   0   8 -11   58.64    2.44
   0   8 -11   62.48    2.95
   0  -8  11   57.82    1.62
   0  -8  11   58.64    1.62
   0   8 -11   58.12    1.70
   0   8 -11   59.52    1.77
   0  -8  10    1.26    0.89
   0  -8  10    0.00    0.59
   0   8 -10   -0.15    0.59
   0   8 -10   -0.22    0.89
   0  -8  10    0.37    0.44
   0  -8  10    0.30    0.44
   0   8 -10   -0.22    0.44
   0   8 -10    0.52    0.52
   0  -8   9   13.00    1.33
   0  -8   9   11.37    1.11
   0   8  -9   12.55    1.40
   0   8  -9   11.82    1.03
   0  -8   9   11.30    0.74
   0  -8   9   11.15    0.74
   0   8  -9   10.56    0.74
   0   8  -9   10.63    0.81
   0  -8   8   14.92    1.33
   0  -8   8   15.21    1.18
   0   8  -8   18.31    1.62
   0   8  -8   15.88    1.18
   0  -8   8   17.21    0.81
   0  -8   8   17.95    0.89
   0   8  -8   17.65    0.89
   0   8  -8   17.43    0.96
   0  -8   7  430.24   12.26
   0  -8   7  441.46   12.33
   0   8  -7  441.98   12.33
   0   8  -7  455.79   13.07
   0  -8   7  434.59    8.20
   0  -8   7  445.60    8.42
   0   8  -7  441.54    8.34
   0   8  -7  453.28    8.71
   0  -8   6    0.66    0.74
   0  -8   6   -0.15    0.52
   0   8  -6   -0.81    0.89
   0   8  -6   -0.15    0.52
   0  -8   6    0.22    0.44
   0  -8   6    0.74    0.44
   0   8  -6    0.66    0.52
   0   8  -6   -0.15    0.52
   0  -8   5  331.13    9.38
   0  -8   5  307.50    8.94
   0   8  -5  324.19    9.23
   0   8  -5  310.53    9.23
   0  -8   5  319.32    6.20
   0  -8   5  319.91    6.20
   0   8  -5  310.23    6.13
   0   8  -5  327.59    6.42
   0  -8   4    5.32    0.74
   0  -8   4    7.31    0.96
   0   8  -4    6.50    1.03
   0   8  -4    4.50    0.74
   0  -8   4    6.13    0.66
   0  -8   4    5.91    0.59
   0   8  -4    6.65    0.66
   0   8  -4    6.20    0.66
   0   8  -3    3.32    0.59
   0   8  -3    5.10    0.66
   0  -8   2    2.07    0.59
   0   8  -2    1.18    0.81
   0  -8   2    2.44    0.52
   0  -8   2    2.29    0.59
   0   8  -2    3.25    0.66
   0   8  -2    2.36    0.59
   0  -8   1  141.42    4.43
   0  -8   1  140.16    4.28
   0   8  -1  137.80    4.28
   0   8  -1  146.07    4.65
   0  -8   1  141.34    3.25
   0  -8   1  133.00    3.03
   0  -8   0  159.29    4.80
   0  -8   0  154.42    4.73
   0   8   0  160.84    5.02
   0   8   0  156.26    4.73
   0  -8   0  163.57    3.62
   0  -8   0  163.35    3.62
   0   8   0  158.85    3.62
   0   8   0  159.59    3.54
   0  -8  -1   11.22    0.89
   0  -8  -1   11.15    0.96
   0   8   1   10.56    0.96
   0   8   1   12.63    1.11
   0  -8  -1   12.11    0.89
   0  -8  -1   10.34    0.81
   0   8   1   10.71    0.89
   0   8   1   11.00    0.89
   0  -8  -2  273.75    7.83
   0  -8  -2  275.60    7.83
   0   8   2  280.40    8.05
   0   8   2  287.64    8.27
   0  -8  -2  285.13    5.91
   0  -8  -2  286.31    5.83
   0   8   2  271.10    5.69
   0   8   2  288.82    5.91
   0  -8  -3    0.81    0.59
   0  -8  -3    1.18    0.59
   0   8   3    1.33    0.66
   0   8   3   -0.37    0.74
   0  -8  -3    0.89    0.66
   0  -8  -3    0.74    0.52
   0   8   3    1.62    0.66
   0   8   3    0.59    0.59
   0  -8  -4   75.99    2.58
   0  -8  -4   73.92    2.58
   0   8   4   71.71    2.58
   0   8   4   73.26    2.73
   0  -8  -4   72.89    2.22
   0  -8  -4   72.74    2.07
   0   8   4   72.15    2.22
   0   8   4   73.85    2.14
   0  -8  -5   53.17    2.14
   0   8   5   50.36    2.07
   0  -8  -5   54.06    1.85
   0  -8  -5   51.55    1.70
   0   8   5   56.27    1.92
   0   8   5   53.32    1.77
   0   8   7   87.07    3.03
   0   8   7   93.34    3.40
   0  -8  -7   91.57    2.81
   0  -8  -7   96.89    2.58
   0   8   7   92.83    2.66
   0   8   7   88.25    2.58
   0  -8  -8    2.44    0.81
   0  -8  -8    1.99    0.81
   0   8   8    0.89    0.96
   0   8   8    1.99    0.66
   0  -8  -8    2.44    0.74
   0  -8  -8    3.10    0.66
   0   8   8    2.81    0.74
   0   8   8    2.44    0.66
   0  -8  -9    0.07    0.74
   0  -8  -9   -0.15    0.74
   0   8   9   -0.07    0.59
   0   8   9    0.59    0.96
   0  -8  -9    0.96    0.66
   0  -8  -9    0.74    0.59
   0   8   9    0.30    0.59
   0   8   9    0.07    0.52
   0  -8 -10   49.92    2.22
   0  -8 -10   53.32    2.36
   0   8  10   51.84    2.14
   0   8  10   51.47    2.51
   0  -8 -10   51.25    1.92
   0  -8 -10   49.40    1.77
   0   8  10   52.06    1.99
   0   8  10   48.22    1.77
   0  -8 -11    2.66    0.89
   0  -8 -11    2.44    0.89
   0   8  11    3.62    1.03
   0   8  11    2.58    0.74
   0  -8 -11    3.32    0.74
   0  -8 -11    2.73    0.66
   0   8  11    3.40    0.74
   0   8  11    2.36    0.66
   0  -8 -12    0.89    0.96
   0  -8 -12    1.85    0.74
   0   8  12    1.77    1.03
   0   8  12    2.81    0.81
   0  -8 -12    1.40    0.74
   0  -8 -12    1.70    0.59
   0   8  12    1.77    0.74
   0   8  12    0.44    0.59
   0  -8 -13    3.40    1.03
   0  -8 -13    2.29    0.81
   0   8  13    3.47    0.89
   0   8  13    2.95    1.03
   0  -8 -13    2.14    0.74
   0  -8 -13    4.14    0.74
   0   8  13    3.03    0.66
   0   8  13    3.62    0.81
   0  -8 -14    0.59    0.81
   0  -8 -14   -1.03    0.96
   0   8  14    0.89    1.03
   0   8  14   -0.22    0.81
   0  -8 -14    1.55    0.66
   0  -8 -14   -0.07    0.74
   0   8  14    1.26    0.81
   0   8  14    0.74    0.66
   0  -8 -15   16.39    1.55
   0  -8 -15   14.33    1.48
   0   8  15   18.46    1.70
   0   8  15   17.35    1.48
   0  -8 -15   17.21    1.33
   0  -8 -15   14.99    1.11
   0   8  15   15.95    1.18
   0   8  15   17.58    1.33
   0  -8 -16   14.84    1.62
   0  -8 -16   16.02    1.55
   0   8  16   13.66    1.62
   0   8  16   16.02    1.48
   0  -8 -16   15.73    1.26
   0  -8 -16   17.65    1.18
   0   8  16   15.36    1.26
   0   8  16   14.55    1.18
   0  -8 -17    4.95    1.26
   0  -8 -17    4.58    1.11
   0   8  17    2.88    1.18
   0   8  17    4.28    1.11
   0  -8 -17    5.91    0.96
   0  -8 -17    5.17    0.81
   0   8  17    5.32    0.81
   0   8  17    4.06    0.89
   0  -8 -18   86.25    3.54
   0  -8 -18   85.74    3.54
   0  -8 -18   83.15    2.81
   0  -8 -18   77.91    2.66
   0  -8 -19    4.58    1.26
   0  -8 -19    2.81    0.96
   0   8  19    3.03    1.11
   0   8  19    3.69    1.26
   0  -8 -19    3.18    0.81
   0  -8 -19    1.77    0.81
   0   8  19    2.51    0.74
   0   8  19    3.40    0.89
   0  -8 -20    2.66    1.03
   0  -8 -20    1.11    1.11
   0   8  20    1.18    1.11
   0   8  20    1.92    1.03
   0  -8 -20    1.62    0.66
   0   8  20    2.29    0.66
   0   8  20    1.18    0.74
   0  -8 -21   -0.59    0.96
   0  -8 -21    0.00    1.11
   0   8  21    0.44    1.11
   0   8  21   -0.22    1.03
   0  -8 -21    0.44    0.59
   0  -8 -21    0.74    0.59
   0   8  21    0.15    0.66
   0   8  21    0.30    0.52
   0  -8 -22    2.88    1.26
   0  -8 -22    2.66    1.33
   0   8  22    2.07    1.26
   0   8  22    2.44    1.26
   0  -8 -22    2.66    0.74
   0  -8 -22    2.22    0.59
   0   8  22    2.81    0.66
   0   8  22    2.95    0.81
   0  -8 -23   -0.15    1.11
   0  -8 -23    3.99    1.40
   0   8  23    1.77    1.26
   0   8  23    1.92    1.03
   0  -8 -23    2.66    0.66
   0  -8 -23    2.73    0.66
   0   8  23    3.25    0.74
   0   8  23    3.69    0.74
   0  -9  19    0.59    0.96
   0  -9  19    0.37    0.74
   0   9 -19    0.00    1.03
   0   9 -19    1.70    1.18
   0  -9  18    1.40    1.26
   0  -9  18    1.48    1.11
   0   9 -18    1.92    1.18
   0   9 -18   -0.44    1.18
   0  -9  17    1.55    1.03
   0   9 -17    0.89    1.18
   0   9 -17    1.03    1.11
   0  -9  17    1.55    0.37
   0  -9  17    2.29    0.44
   0   9 -17    1.18    0.44
   0   9 -17    1.62    0.44
   0  -9  16   -0.74    1.33
   0  -9  16    0.59    0.81
   0   9 -16    0.00    0.96
   0   9 -16   -0.74    1.03
   0  -9  16   -0.30    0.37
   0  -9  16    0.00    0.37
   0   9 -16    0.66    0.37
   0   9 -16    0.37    0.44
   0  -9  15   10.49    1.26
   0  -9  15    9.08    1.77
   0   9 -15    6.72    1.40
   0   9 -15    6.94    1.40
   0  -9  15    9.53    0.66
   0  -9  15    8.64    0.59
   0   9 -15    9.53    0.66
   0   9 -15    8.71    0.66
   0  -9  14    4.95    1.03
   0  -9  14    6.06    1.40
   0   9 -14    5.46    1.11
   0   9 -14    3.84    1.18
   0  -9  14    5.02    0.52
   0  -9  14    4.65    0.52
   0  -9  13   54.20    2.51
   0   9 -13   50.14    2.58
   0   9 -13   57.01    3.03
   0  -9  13   50.96    1.48
   0  -9  13   51.25    1.48
   0   9 -13   51.25    1.62
   0   9 -13   49.11    1.48
   0  -9  12    7.24    1.03
   0  -9  12    7.68    1.26
   0   9 -12    6.79    1.33
   0   9 -12    6.79    1.03
   0  -9  12    5.39    0.59
   0  -9  12    7.38    0.59
   0   9 -12    5.32    0.59
   0   9 -12    6.65    0.66
   0  -9  11   64.76    2.66
   0  -9  11   65.65    2.95
   0   9 -11   68.16    3.18
   0   9 -11   67.72    2.73
   0  -9  11   65.65    1.77
   0  -9  11   61.96    1.70
   0   9 -11   62.55    1.85
   0   9 -11   62.99    1.77
   0  -9  10    0.44    0.59
   0  -9  10    0.66    0.81
   0   9 -10    0.37    0.66
   0   9 -10    0.37    0.89
   0  -9  10    0.30    0.44
   0  -9  10   -0.30    0.44
   0   9 -10   -0.30    0.44
   0   9 -10    0.15    0.52
   0  -9   9   22.97    1.48
   0  -9   9   23.34    1.70
   0   9  -9   23.19    1.40
   0   9  -9   21.05    1.70
   0  -9   9   22.75    0.96
   0  -9   9   23.78    1.03
   0   9  -9   24.89    1.18
   0   9  -9   24.59    1.03
   0  -9   8   -0.07    0.59
   0  -9   8   -0.07    0.74
   0   9  -8    0.00    0.59
   0   9  -8    0.00    0.96
   0  -9   8   -0.15    0.37
   0  -9   8    0.59    0.44
   0   9  -8   -0.37    0.44
   0   9  -8   -0.44    0.52
   0  -9   7  164.68    5.17
   0  -9   7  171.11    5.54
   0   9  -7  177.75    5.91
   0   9  -7  168.59    5.24
   0   9  -7  163.35    3.69
   0   9  -7  173.32    3.77
   0  -9   6    0.59    0.59
   0  -9   6    1.70    0.74
   0   9  -6    0.07    0.59
   0   9  -6    0.52    0.96
   0  -9   6   -0.52    0.44
   0  -9   6    0.00    0.44
   0   9  -6    0.89    0.52
   0   9  -6    0.66    0.52
   0  -9   5   39.73    1.99
   0  -9   5   42.46    1.85
   0   9  -5   44.60    1.92
   0  -9   5   38.33    1.33
   0  -9   5   41.50    1.40
   0   9  -5   44.38    1.55
   0   9  -5   42.91    1.48
   0  -9   4   42.54    1.99
   0  -9   4   43.64    1.85
   0   9  -4   44.23    2.22
   0   9  -4   45.79    1.99
   0  -9   4   47.26    1.55
   0  -9   4   49.55    1.55
   0  -9   3  392.94   11.00
   0  -9   3  391.02   11.08
   0   9  -3  403.58   11.59
   0   9  -3  408.75   11.45
   0  -9   3  399.89    7.75
   0  -9   3  399.81    7.75
   0   9  -3  418.72    8.12
   0   9  -3  417.24    8.12
   0  -9   2   58.93    2.36
   0  -9   2   58.19    2.22
   0   9  -2   54.80    2.36
   0   9  -2   55.39    2.14
   0  -9   2   54.20    1.70
   0  -9   2   52.43    1.62
   0   9  -2   54.06    1.77
   0   9  -2   56.49    1.77
   0  -9   1  765.06   20.68
   0  -9   1  776.88   21.05
   0   9  -1  772.45   20.90
   0   9  -1  769.49   21.05
   0  -9   1  766.54   14.25
   0  -9   1  782.05   14.47
   0   9  -1  790.17   14.70
   0   9  -1  775.40   14.47
   0  -9   0   41.95    1.85
   0   9   0   40.17    1.77
   0  -9   0   45.71    1.62
   0  -9   0   44.97    1.55
   0   9   0   41.87    1.62
   0   9   0   38.92    1.48
   0  -9  -1  129.53    4.14
   0   9   1  117.05    3.84
   0  -9  -1  128.42    3.10
   0  -9  -1  130.78    3.10
   0   9   1  125.62    3.03
   0   9   1  129.09    3.18
   0  -9  -2   11.59    1.03
   0   9   2    9.30    1.18
   0  -9  -2   14.33    1.03
   0  -9  -2   14.62    0.96
   0   9   2   11.67    0.96
   0   9   2   12.92    1.03
   0  -9  -3    7.02    0.81
   0   9   3    6.57    0.96
   0  -9  -3    9.38    0.96
   0  -9  -3    7.31    0.74
   0   9   3    7.38    0.89
   0   9   3    7.75    0.81
   0  -9  -4    3.77    0.74
   0  -9  -4    3.47    0.81
   0   9   4    3.03    0.89
   0   9   4    2.88    0.81
   0  -9  -4    2.73    0.74
   0   9   4    2.95    0.74
   0  -9  -5   26.81    1.40
   0  -9  -5   26.36    1.40
   0   9   5   25.48    1.40
   0   9   5   22.67    1.55
   0  -9  -5   23.48    1.26
   0  -9  -6  100.21    3.40
   0  -9  -6   96.59    3.25
   0   9   6   95.71    3.47
   0   9   6   93.93    3.25
   0  -9  -6   94.16    2.73
   0  -9  -6   86.85    2.44
   0  -9  -7   72.22    2.73
   0  -9  -7   74.66    2.73
   0   9   7   73.85    2.95
   0   9   7   68.38    2.58
   0  -9  -7   72.74    2.29
   0  -9  -7   73.92    2.22
   0   9   7   72.44    2.29
   0   9   7   72.81    2.36
   0  -9  -8  306.10    8.79
   0  -9  -8  282.47    8.27
   0   9   8  279.96    8.12
   0   9   8  301.15    8.94
   0  -9  -8  272.35    5.98
   0  -9  -8  281.43    5.98
   0   9   8  275.97    6.06
   0   9   8  275.90    5.91
   0  -9  -9   46.38    2.14
   0  -9  -9   46.60    2.07
   0   9   9   43.72    2.29
   0   9   9   46.82    1.99
   0  -9  -9   43.79    1.77
   0  -9  -9   46.08    1.70
   0   9   9   46.67    1.92
   0   9   9   47.34    1.77
   0  -9 -10  252.56    7.53
   0  -9 -10  243.25    7.31
   0   9  10  240.89    7.16
   0   9  10  250.42    7.75
   0  -9 -10  236.83    5.39
   0  -9 -10  229.59    5.10
   0   9  10  245.54    5.61
   0   9  10  240.89    5.39
   0  -9 -11   18.98    1.48
   0  -9 -11   19.20    1.48
   0   9  11   17.28    1.70
   0   9  11   18.76    1.26
   0  -9 -11   21.64    1.40
   0  -9 -11   20.46    1.26
   0   9  11   19.27    1.33
   0   9  11   19.42    1.26
   0  -9 -12    0.30    0.81
   0  -9 -12    0.37    0.81
   0   9  12   -1.18    0.96
   0   9  12    0.37    0.66
   0  -9 -12    0.37    0.66
   0  -9 -12    0.44    0.59
   0   9  12    0.59    0.66
   0   9  12   -0.15    0.59
   0  -9 -13    0.07    0.74
   0  -9 -13   -0.07    0.96
   0   9  13    1.48    1.11
   0   9  13   -0.15    0.74
   0  -9 -13   -1.11    0.66
   0  -9 -13    0.30    0.66
   0   9  13   -0.66    0.74
   0   9  13    0.74    0.59
   0  -9 -14   23.78    1.77
   0  -9 -14   19.35    1.55
   0   9  14   22.38    1.55
   0   9  14   24.30    1.99
   0  -9 -14   24.89    1.55
   0  -9 -14   24.00    1.40
   0   9  14   22.75    1.55
   0   9  14   25.70    1.40
   0  -9 -15   52.14    2.66
   0  -9 -15   52.06    2.51
   0   9  15   46.60    2.22
   0   9  15   48.07    2.81
   0  -9 -15   48.89    2.07
   0  -9 -15   51.92    1.99
   0   9  15   49.85    2.14
   0   9  15   52.80    2.07
   0  -9 -16    1.48    1.03
   0  -9 -16   -0.15    1.03
   0   9  16    2.88    0.96
   0   9  16    2.44    1.18
   0  -9 -16    2.58    0.81
   0  -9 -16    2.51    0.66
   0   9  16    2.14    0.74
   0   9  16    2.51    0.89
   0   9  17   17.87    1.26
   0  -9 -18   40.03    2.51
   0  -9 -18   43.57    2.51
   0   9  18   37.07    2.14
   0   9  18   36.85    2.51
   0   9  18   38.84    1.92
   0   9  18   32.71    1.85
   0  -9 -19   14.92    1.70
   0  -9 -19   16.69    1.70
   0   9  19   15.14    1.48
   0   9  19   11.37    1.62
   0  -9 -19   14.10    1.18
   0  -9 -19   14.62    1.26
   0   9  19   12.33    1.40
   0   9  19   16.47    1.18
   0  -9 -20   -0.59    1.11
   0  -9 -20    0.81    0.96
   0   9  20    0.52    0.96
   0   9  20   -1.62    1.11
   0  -9 -20   -1.18    0.59
   0  -9 -20   -0.66    0.66
   0   9  20    0.59    0.59
   0   9  20    0.89    0.66
   0  -9 -21    8.12    1.40
   0  -9 -21    9.82    1.55
   0   9  21    9.90    1.40
   0   9  21    8.79    1.62
   0  -9 -21    8.20    0.96
   0  -9 -21    8.71    0.96
   0   9  21    9.53    1.11
   0   9  21    9.23    0.96
   0  -9 -22    1.48    1.33
   0  -9 -22    0.52    1.18
   0   9  22    0.22    1.11
   0   9  22    0.07    1.11
   0  -9 -22    0.22    0.59
   0  -9 -22   -0.52    0.52
   0   9  22   -0.15    0.52
   0   9  22    0.15    0.66
   0  -9 -23   -0.66    1.33
   0   9  23    0.15    1.26
   0  -9 -23    1.11    0.59
   0  -9 -23    0.22    0.59
   0   9  23    0.07    0.52
   0   9  23    1.85    0.74
   0 -10  18    1.11    1.11
   0 -10  18    0.66    0.81
   0  10 -18    0.30    1.11
   0  10 -18   -2.14    0.96
   0 -10  17    1.62    1.33
   0 -10  17    1.92    1.26
   0  10 -17    0.07    1.26
   0  10 -17    1.18    1.18
   0 -10  16   -0.07    1.40
   0  10 -16    3.77    1.26
   0  10 -16    0.96    1.26
   0 -10  16    3.47    0.44
   0 -10  16    4.21    0.44
   0  10 -16    3.40    0.44
   0  10 -16    3.69    0.44
   0 -10  15    1.55    1.40
   0 -10  15    2.44    0.96
   0  10 -15    2.22    1.11
   0  10 -15    0.59    1.03
   0 -10  15    2.29    0.37
   0 -10  15    2.51    0.44
   0  10 -15    1.99    0.44
   0  10 -15    2.22    0.44
   0 -10  14    3.47    1.33
   0 -10  14    2.88    0.89
   0  10 -14    1.92    1.26
   0  10 -14    4.95    1.26
   0 -10  14    4.28    0.52
   0 -10  14    3.91    0.44
   0  10 -14    4.21    0.52
   0  10 -14    4.06    0.52
   0 -10  13    0.52    1.03
   0 -10  13    0.44    0.81
   0  10 -13    0.00    0.89
   0  10 -13    0.22    1.03
   0 -10  13    0.74    0.37
   0 -10  13    0.07    0.37
   0  10 -13   -0.30    0.44
   0  10 -13    0.00    0.44
   0 -10  12    1.33    0.74
   0  10 -12    1.26    1.11
   0 -10  12    0.66    0.44
   0 -10  12    1.11    0.44
   0  10 -12    0.89    0.44
   0  10 -12    0.81    0.52
   0 -10  11    6.35    0.96
   0 -10  11    6.13    1.18
   0  10 -11    2.81    0.89
   0  10 -11    5.32    1.26
   0 -10  11    6.13    0.59
   0 -10  11    5.76    0.59
   0  10 -11    5.02    0.66
   0  10 -11    5.46    0.66
   0 -10  10   32.35    1.99
   0 -10  10   34.49    1.85
   0  10 -10   30.20    2.14
   0  10 -10   37.51    1.92
   0 -10  10   32.35    1.18
   0 -10  10   33.45    1.26
   0 -10   9   41.95    2.22
   0 -10   9   41.80    2.07
   0  10  -9   42.54    2.51
   0  10  -9   40.10    1.99
   0  10  -9   38.62    1.55
   0  10  -9   36.41    1.40
   0 -10   8   90.61    3.32
   0 -10   8   82.04    3.32
   0  10  -8   86.99    3.18
   0  10  -8   86.40    3.62
   0 -10   8   81.23    2.14
   0 -10   8   85.07    2.22
   0 -10   7   52.65    2.51
   0 -10   7   46.82    2.14
   0  10  -7   55.02    2.29
   0  10  -7   52.14    2.66
   0 -10   7   50.96    1.55
   0 -10   7   52.06    1.70
   0  10  -7   47.63    1.70
   0  10  -7   52.88    1.70
   0  10  -6   32.35    2.07
   0  10  -6   29.83    1.62
   0 -10   6   27.18    1.18
   0 -10   6   28.06    1.18
   0 -10   5   13.96    1.11
   0 -10   5   14.25    1.18
   0  10  -5   12.41    1.11
   0  10  -5   11.89    1.33
   0 -10   5   12.63    0.89
   0 -10   5   12.18    0.89
   0  10  -5   12.18    0.96
   0  10  -5   14.55    0.96
   0 -10   4   17.43    1.33
   0 -10   4   15.66    1.11
   0  10  -4   15.73    1.18
   0  10  -4   16.99    1.55
   0 -10   4   17.28    0.96
   0 -10   4   16.32    1.03
   0  10  -4   15.88    1.03
   0  10  -4   17.65    1.03
   0 -10   3    2.22    0.74
   0 -10   3    1.77    0.59
   0  10  -3    1.62    0.66
   0  10  -3    1.99    0.89
   0 -10   3    1.62    0.59
   0 -10   3    1.26    0.52
   0 -10   2    3.10    0.74
   0 -10   2    2.22    0.59
   0  10  -2    1.55    0.59
   0  10  -2    1.40    0.81
   0 -10   2    1.48    0.52
   0 -10   2    2.51    0.66
   0  10  -2    2.29    0.66
   0  10  -2    1.92    0.59
   0 -10   1   14.18    1.03
   0 -10   1   12.92    1.11
   0  10  -1   13.44    1.11
   0  10  -1   13.14    1.26
   0 -10   1   14.99    0.96
   0 -10   1   13.66    0.96
   0  10  -1   15.36    1.03
   0  10  -1   14.70    1.03
   0 -10   0   55.39    2.22
   0 -10   0   58.27    2.22
   0  10   0   65.58    2.66
   0  10   0   57.53    2.29
   0 -10   0   53.54    1.77
   0 -10   0   57.60    1.77
   0  10   0   59.08    1.99
   0  10   0   59.89    1.92
   0 -10  -1   40.69    1.85
   0 -10  -1   36.33    1.62
   0  10   1   40.62    1.99
   0  10   1   37.74    1.77
   0 -10  -1   39.58    1.55
   0 -10  -1   42.91    1.55
   0  10   1   40.10    1.62
   0  10   1   39.58    1.55
   0 -10  -2  356.98   10.12
   0 -10  -2  364.00   10.26
   0  10   2  364.81   10.41
   0  10   2  359.34   10.26
   0 -10  -2  353.88    7.24
   0  10   2  343.32    7.02
   0 -10  -3  170.51    5.24
   0 -10  -3  174.06    5.32
   0  10   3  176.94    5.54
   0  10   3  169.48    5.32
   0 -10  -4    0.00    0.59
   0 -10  -4    1.03    0.59
   0  10   4    0.44    0.74
   0  10   4    0.22    0.66
   0 -10  -4   -0.30    0.59
   0 -10  -4    0.30    0.66
   0  10   4    0.59    0.66
   0  10   4    0.81    0.66
   0 -10  -5  301.52    8.64
   0 -10  -5  290.15    8.34
   0  10   5  299.01    8.79
   0  10   5  291.55    8.49
   0 -10  -5  291.03    6.20
   0 -10  -5  291.03    6.13
   0  10   5  292.14    6.28
   0  10   5  299.53    6.35
   0 -10  -6   69.20    2.58
   0 -10  -6   62.18    2.36
   0  10   6   66.39    2.58
   0  10   6   59.60    2.58
   0 -10  -6   64.25    2.07
   0 -10  -6   67.57    2.22
   0  10   6   66.76    2.14
   0  10   6   65.06    2.22
   0 -10  -7  318.65    9.16
   0 -10  -7  309.94    8.94
   0  10   7  317.55    9.38
   0  10   7  322.05    9.30
   0 -10  -7  317.10    6.65
   0 -10  -7  311.79    6.65
   0  10   7  309.72    6.65
   0  10   7  307.72    6.50
   0 -10  -8    2.66    0.81
   0 -10  -8    2.73    0.81
   0  10   8    1.03    1.11
   0  10   8    1.85    0.74
   0 -10  -8    1.92    0.66
   0 -10  -8    3.03    0.74
   0  10   8    2.22    0.66
   0  10   8    1.92    0.74
   0 -10  -9    0.74    0.74
   0 -10  -9    0.52    0.81
   0  10   9    0.00    0.59
   0  10   9   -0.74    1.11
   0  10   9    0.81    0.59
   0  10   9    1.18    0.74
   0 -10 -10    3.25    0.96
   0 -10 -10    3.77    0.89
   0  10  10    2.29    1.26
   0  10  10    2.73    0.74
   0 -10 -10    3.18    0.66
   0 -10 -10    2.66    0.74
   0  10  10    3.25    0.74
   0  10  10    3.32    0.81
   0 -10 -11  162.76    5.24
   0 -10 -11  157.81    5.17
   0  10  11  168.08    5.76
   0  10  11  162.32    5.17
   0 -10 -11  155.45    4.06
   0 -10 -11  158.33    3.91
   0  10  11  159.51    4.14
   0  10  11  157.44    3.99
   0 -10 -12    4.80    1.03
   0 -10 -12    4.50    1.03
   0  10  12    4.58    0.89
   0  10  12    4.06    1.33
   0 -10 -12    4.50    0.81
   0 -10 -12    3.69    0.89
   0  10  12    4.80    0.81
   0  10  12    5.02    0.89
   0 -10 -13  186.10    4.50
   0 -10 -13  189.20    4.73
   0  10  13  176.20    4.36
   0  10  13  177.53    4.58
   0 -10 -14    1.62    0.89
   0 -10 -14    0.66    0.96
   0  10  14    1.77    0.81
   0  10  14    0.52    1.18
   0 -10 -14    1.62    0.74
   0 -10 -14    1.48    0.66
   0 -10 -15    9.08    1.33
   0 -10 -15    7.90    1.26
   0  10  15    9.53    1.55
   0  10  15   10.34    1.18
   0 -10 -15    7.68    1.03
   0 -10 -15    9.53    1.03
   0 -10 -16    3.40    0.89
   0  10  16    4.50    0.89
   0 -10 -17    2.58    1.18
   0 -10 -17    1.55    1.11
   0  10  17    1.18    0.89
   0  10  17    0.37    1.26
   0 -10 -17    0.07    0.74
   0 -10 -17    0.07    0.59
   0  10  17    0.30    0.66
   0  10  17   -0.15    0.81
   0 -10 -18    6.79    1.33
   0 -10 -18    7.98    1.55
   0  10  18    7.61    1.18
   0  10  18    7.53    1.62
   0 -10 -18    6.28    0.89
   0 -10 -18    6.50    1.03
   0  10  18    6.13    0.89
   0  10  18    7.68    1.11
   0 -10 -19    4.87    1.40
   0 -10 -19    4.65    1.26
   0  10  19    3.47    1.26
   0  10  19    5.32    1.03
   0 -10 -19    3.47    0.81
   0 -10 -19    5.02    0.81
   0  10  19    4.87    0.96
   0  10  19    4.36    0.74
   0 -10 -20    3.91    1.33
   0 -10 -20    4.58    1.33
   0  10  20    5.17    1.48
   0  10  20    6.65    1.18
   0 -10 -20    6.06    0.89
   0 -10 -20    4.21    0.89
   0  10  20    4.43    0.74
   0  10  20    5.46    0.89
   0 -10 -21    0.66    1.11
   0 -10 -21    0.07    1.11
   0  10  21   -0.15    0.89
   0  10  21   -0.89    1.18
   0 -10 -21    0.59    0.66
   0  10  21    0.59    0.59
   0  10  21    0.15    0.66
   0 -10 -22    6.87    1.62
   0 -10 -22    4.21    1.48
   0  10  22    2.95    1.26
   0  10  22    6.50    1.40
   0 -10 -22    6.94    0.96
   0 -10 -22    6.57    0.89
   0  10  22    6.87    0.96
   0  10  22    6.28    0.89
   0 -11  17    0.59    1.18
   0 -11  17   -0.07    0.74
   0  11 -17   -0.44    1.11
   0  11 -17   -1.48    0.96
   0 -11  16   -0.07    1.11
   0 -11  16    1.77    1.18
   0  11 -16    0.22    1.11
   0  11 -16   -0.89    1.26
   0 -11  15   -1.18    1.33
   0  11 -15    0.52    1.18
   0  11 -15    0.30    1.03
   0 -11  15    1.99    0.37
   0 -11  15    1.55    0.37
   0  11 -15    2.07    0.44
   0  11 -15    1.62    0.44
   0 -11  14    1.48    1.40
   0 -11  14    0.59    0.81
   0  11 -14    0.15    1.18
   0  11 -14    0.37    1.03
   0 -11  14    0.81    0.37
   0 -11  14    0.44    0.37
   0  11 -14    0.44    0.44
   0  11 -14    0.44    0.37
   0 -11  13    8.86    1.26
   0 -11  13    6.42    1.48
   0  11 -13    6.94    1.48
   0  11 -13    3.91    1.26
   0 -11  13    8.94    0.59
   0 -11  13    8.79    0.59
   0  11 -13    8.64    0.66
   0  11 -13    9.90    0.74
   0 -11  12   -0.30    1.03
   0 -11  12    0.59    0.74
   0  11 -12   -1.33    0.96
   0  11 -12   -0.37    0.89
   0 -11  12    0.81    0.44
   0 -11  12   -0.52    0.37
   0  11 -12    0.30    0.44
   0  11 -12    0.22    0.44
   0 -11  11    6.57    0.59
   0 -11  11    5.83    0.59
   0  11 -11    6.94    0.74
   0  11 -11    5.98    0.66
   0 -11  10    1.03    0.89
   0 -11  10    0.74    0.66
   0  11 -10    0.44    0.96
   0  11 -10    0.30    0.74
   0 -11  10   -0.59    0.44
   0 -11  10    0.22    0.44
   0  11 -10    0.22    0.52
   0  11 -10   -0.37    0.59
   0 -11   9   18.98    0.96
   0 -11   9   18.31    1.03
   0  11  -9   18.31    1.11
   0  11  -9   16.91    0.96
   0 -11   8   18.54    1.55
   0 -11   8   16.84    1.33
   0  11  -8   14.25    1.26
   0  11  -8   16.69    1.77
   0 -11   8   14.99    0.89
   0 -11   8   13.59    0.89
   0  11  -8   17.06    1.11
   0  11  -8   16.62    1.03
   0 -11   7    4.73    0.81
   0 -11   7    4.80    0.96
   0  11  -7    4.21    0.89
   0  11  -7    6.20    1.33
   0 -11   7    5.32    0.66
   0 -11   7    4.43    0.66
   0  11  -7    3.77    0.74
   0  11  -7    3.10    0.74
   0 -11   6    2.29    0.66
   0 -11   6    1.70    0.81
   0  11  -6    2.29    1.11
   0  11  -6    2.36    0.74
   0 -11   6    1.55    0.52
   0 -11   6    1.99    0.52
   0  11  -6    1.62    0.66
   0  11  -6    2.07    0.66
   0 -11   5   38.70    1.99
   0 -11   5   43.50    1.99
   0  11  -5   41.06    2.29
   0  11  -5   36.11    1.85
   0 -11   5   42.31    1.55
   0 -11   5   42.46    1.55
   0  11  -5   39.36    1.62
   0  11  -5   39.51    1.62
   0 -11   4   48.22    2.07
   0 -11   4   47.85    2.22
   0  11  -4   47.48    2.07
   0  11  -4   46.15    2.44
   0 -11   4   44.01    1.62
   0 -11   4   44.97    1.62
   0  11  -4   48.96    1.77
   0  11  -4   45.86    1.77
   0 -11   3   47.63    2.14
   0 -11   3   45.34    1.99
   0 -11   3   45.12    1.62
   0 -11   3   43.64    1.55
   0  11  -3   38.70    1.62
   0  11  -3   44.68    1.77
   0 -11   2   11.67    0.96
   0 -11   2   13.22    1.18
   0  11  -2   12.26    1.33
   0  11  -2   11.45    1.11
   0 -11   2   10.71    0.89
   0 -11   2   12.48    0.96
   0  11  -2   11.96    1.03
   0 -11   1    2.73    0.66
   0 -11   1    3.62    0.81
   0  11  -1    4.06    0.96
   0  11  -1    2.29    0.74
   0 -11   1    3.10    0.66
   0 -11   1    2.58    0.66
   0  11  -1    2.95    0.74
   0  11  -1    2.58    0.74
   0 -11   0   15.43    1.11
   0 -11   0   14.62    1.18
   0  11   0   16.32    1.40
   0  11   0   14.33    1.18
   0 -11   0   15.80    1.11
   0 -11  -1    0.22    0.66
   0 -11  -1   -0.30    0.52
   0  11   1   -0.74    0.74
   0  11   1    0.00    0.66
   0 -11  -2    2.14    0.59
   0 -11  -2    1.77    0.66
   0  11   2    2.29    0.81
   0  11   2    2.81    0.81
   0 -11  -2    1.99    0.66
   0 -11  -2    2.88    0.66
   0  11   2    2.29    0.74
   0  11   2    1.62    0.66
   0 -11  -3   42.31    1.85
   0 -11  -3   42.54    1.92
   0  11   3   38.40    1.99
   0  11   3   43.27    2.07
   0 -11  -3   41.35    1.62
   0 -11  -3   43.20    1.70
   0  11   3   41.80    1.70
   0  11   3   41.65    1.77
   0 -11  -4    7.75    0.89
   0 -11  -4    7.02    0.89
   0  11   4    9.82    1.11
   0  11   4    8.64    1.11
   0 -11  -4    6.50    0.89
   0 -11  -4    8.57    0.89
   0  11   4    7.16    0.96
   0  11   4    7.09    0.89
   0 -11  -5   15.43    1.18
   0 -11  -5   15.88    1.18
   0  11   5   17.65    1.33
   0  11   5   14.40    1.40
   0 -11  -5   17.72    1.18
   0 -11  -5   18.24    1.18
   0  11   5   15.51    1.18
   0  11   5   16.47    1.11
   0 -11  -6   24.81    1.48
   0 -11  -6   26.88    1.48
   0  11   6   25.63    1.55
   0  11   6   27.10    1.85
   0 -11  -6   25.63    1.33
   0 -11  -6   26.59    1.40
   0  11   6   23.34    1.40
   0  11   6   26.29    1.40
   0 -11  -7    0.44    0.74
   0 -11  -7    1.11    0.66
   0  11   7    0.96    0.74
   0  11   7   -0.52    0.96
   0 -11  -7    0.89    0.59
   0 -11  -7    1.18    0.59
   0  11   7    0.66    0.66
   0  11   7    1.62    0.66
   0 -11  -8   93.34    3.40
   0 -11  -8   92.09    3.32
   0  11   8   92.75    3.40
   0  11   8   89.06    3.62
   0 -11  -8   88.54    2.73
   0 -11  -8   90.91    2.66
   0  11   8   86.25    2.73
   0  11   8   87.44    2.66
   0 -11  -9    2.14    0.74
   0 -11  -9    1.18    0.81
   0  11   9    2.07    1.26
   0  11   9    1.85    0.74
   0 -11  -9    1.77    0.66
   0 -11  -9    1.62    0.74
   0 -11 -10   14.25    1.33
   0 -11 -10   13.44    1.40
   0  11  10   13.22    1.70
   0  11  10   13.51    1.18
   0 -11 -10   15.21    1.26
   0 -11 -10   15.51    1.11
   0  11  10   15.36    1.26
   0  11  10   15.43    1.18
   0 -11 -11   28.58    1.77
   0 -11 -11   31.31    1.85
   0  11  11   29.69    2.29
   0  11  11   29.24    1.70
   0 -11 -11   30.65    1.55
   0 -11 -11   31.98    1.70
   0  11  11   32.94    1.77
   0  11  11   33.67    1.62
   0 -11 -12    3.03    1.03
   0 -11 -12    2.73    0.96
   0  11  12    5.76    1.48
   0  11  12    3.62    0.89
   0 -11 -12    3.47    0.81
   0 -11 -12    2.22    0.81
   0  11  12    3.32    0.74
   0  11  12    3.77    0.89
   0 -11 -13   28.28    1.92
   0 -11 -13   33.16    2.07
   0  11  13   27.77    2.36
   0  11  13   28.80    1.77
   0 -11 -13   30.20    1.55
   0 -11 -13   33.45    1.77
   0  11  13   30.72    1.55
   0  11  13   30.65    1.77
   0 -11 -14    9.23    1.33
   0 -11 -14   10.71    1.40
   0  11  14    9.67    1.70
   0  11  14   10.63    1.26
   0 -11 -14   10.63    1.03
   0 -11 -14   11.08    1.18
   0  11  14   11.59    1.18
   0  11  14   10.34    1.03
   0 -11 -15    1.55    1.11
   0  11  15    1.40    0.89
   0 -11 -15    0.22    0.81
   0  11  15    0.30    0.74
   0 -11 -16    3.18    1.18
   0 -11 -16    2.51    1.11
   0  11  16    3.25    1.40
   0  11  16    2.66    0.96
   0 -11 -16    1.99    0.81
   0 -11 -16    2.51    0.74
   0  11  16    3.77    0.96
   0  11  16    2.44    0.74
   0 -11 -17    9.30    1.48
   0 -11 -17   12.55    1.85
   0  11  17   11.30    1.33
   0  11  17   10.04    1.85
   0 -11 -17   13.07    1.26
   0 -11 -17   11.15    1.11
   0  11  17   14.77    1.33
   0  11  17   14.70    1.18
   0 -11 -18    1.18    1.33
   0 -11 -18    0.07    1.03
   0  11  18   -0.37    1.26
   0  11  18   -0.22    0.81
   0 -11 -18    0.96    0.59
   0 -11 -18   -0.44    0.66
   0  11  18    0.30    0.59
   0  11  18    0.66    0.74
   0 -11 -19   54.35    2.88
   0 -11 -19   53.32    3.54
   0 -11 -19   56.57    2.14
   0 -11 -19   57.45    2.29
   0  11  19   58.41    2.44
   0  11  19   60.70    2.22
   0 -11 -20    0.66    1.11
   0 -11 -20   -0.15    1.11
   0  11  20    0.00    0.89
   0  11  20   -1.03    1.11
   0 -11 -20    0.89    0.59
   0 -11 -20   -0.30    0.59
   0  11  20   -1.40    0.66
   0 -11 -21   13.74    1.70
   0 -11 -21   11.00    1.99
   0 -11 -21   16.84    1.33
   0 -11 -21   13.81    1.18
   0  11  21   13.07    1.26
   0  11  21   13.74    1.11
   0 -11 -22   -0.15    1.18
   0  11  22    0.81    1.11
   0 -11 -22    1.70    0.81
   0 -11 -22    0.96    0.66
   0  11  22    1.70    0.59
   0  11  22    0.59    0.66
   0 -12  16    0.37    0.81
   0 -12  16    1.55    1.11
   0  12 -16    0.59    1.11
   0  12 -16   -0.59    1.03
   0 -12  15    0.81    1.26
   0 -12  15    1.40    1.11
   0  12 -15    0.00    1.18
   0  12 -15   -0.59    1.26
   0 -12  14    0.22    0.96
   0 -12  14    3.40    1.48
   0  12 -14    0.07    1.11
   0  12 -14    2.22    1.18
   0 -12  14    0.22    0.37
   0 -12  14    0.66    0.37
   0  12 -14   -0.07    0.37
   0  12 -14    1.03    0.37
   0 -12  13    0.37    0.81
   0 -12  13    1.62    1.33
   0  12 -13   -0.52    1.03
   0  12 -13    0.15    1.03
   0 -12  13    0.44    0.37
   0 -12  13    0.66    0.37
   0  12 -13    0.15    0.37
   0  12 -13    0.44    0.44
   0 -12  12    3.03    1.33
   0 -12  12    5.24    1.11
   0  12 -12    2.95    1.18
   0  12 -12    2.95    1.18
   0 -12  12    3.77    0.52
   0 -12  12    4.43    0.52
   0  12 -12    5.46    0.59
   0  12 -12    5.32    0.59
   0 -12  11   -0.44    0.74
   0 -12  11   -0.07    1.03
   0  12 -11    0.37    0.89
   0  12 -11    1.03    1.03
   0 -12  11   -0.44    0.37
   0 -12  11    0.07    0.37
   0  12 -11    0.07    0.52
   0  12 -11    0.00    0.44
   0 -12  10    0.59    0.96
   0  12 -10   -0.37    0.89
   0 -12  10    0.15    0.44
   0 -12  10    0.74    0.52
   0  12 -10    0.81    0.59
   0  12 -10    0.44    0.44
   0 -12   9    8.64    1.18
   0 -12   9    7.16    0.74
   0 -12   9    8.05    0.74
   0  12  -9    7.53    0.89
   0  12  -9    7.90    0.74
   0 -12   8    8.57    1.11
   0 -12   8    8.34    1.26
   0  12  -8    7.46    1.11
   0  12  -8    7.83    1.48
   0 -12   8    7.24    0.81
   0 -12   8    7.09    0.74
   0  12  -8    7.46    0.89
   0  12  -8    7.61    0.81
   0 -12   7    3.10    0.96
   0 -12   7    4.36    0.89
   0  12  -7    4.95    1.26
   0  12  -7    3.47    0.89
   0 -12   7    2.36    0.59
   0 -12   7    3.99    0.66
   0  12  -7    3.18    0.74
   0  12  -7    3.62    0.74
   0 -12   6    5.98    1.03
   0 -12   6    8.79    1.03
   0  12  -6    6.35    0.96
   0  12  -6    8.12    1.40
   0 -12   6    7.68    0.81
   0 -12   6    9.67    0.81
   0  12  -6    6.87    0.89
   0  12  -6    9.08    0.96
   0 -12   5    3.91    0.74
   0 -12   5    2.44    0.81
   0  12  -5    3.84    0.81
   0  12  -5    2.73    1.03
   0 -12   5    3.25    0.66
   0 -12   5    2.95    0.59
   0  12  -5    3.32    0.74
   0  12  -5    4.14    0.74
   0 -12   4    1.26    0.81
   0 -12   4    1.18    0.66
   0  12  -4    0.22    0.89
   0  12  -4    0.59    0.66
   0 -12   4    0.52    0.59
   0 -12   4    1.33    0.59
   0  12  -4    1.85    0.74
   0  12  -4    0.96    0.66
   0 -12   3   33.67    1.70
   0 -12   3   36.41    1.92
   0  12  -3   36.19    2.14
   0  12  -3   38.70    1.92
   0 -12   3   32.94    1.48
   0  12  -3   37.29    1.62
   0  12  -3   33.08    1.62
   0 -12   2   -0.37    0.74
   0 -12   2   -0.07    0.52
   0  12  -2    0.52    0.66
   0  12  -2    0.07    0.81
   0 -12   1    5.17    0.74
   0 -12   1    3.18    0.81
   0  12  -1    5.17    0.89
   0  12  -1    3.77    1.03
   0 -12   1    3.84    0.66
   0 -12   0   96.08    3.47
   0 -12   0   90.69    3.18
   0  12   0   91.28    3.47
   0  12   0   86.03    3.25
   0 -12   0   94.01    2.66
   0 -12   0   89.58    2.51
   0  12   0   92.16    2.73
   0  12   0   92.31    2.66
   0 -12  -1   60.70    2.36
   0 -12  -1   65.13    2.66
   0  12   1   65.87    2.73
   0  12   1   66.91    2.81
   0 -12  -1   63.88    2.07
   0 -12  -1   62.84    2.14
   0  12   1   62.77    2.14
   0  12   1   66.02    2.29
   0 -12  -2   54.20    2.22
   0 -12  -2   55.68    2.36
   0  12   2   55.46    2.44
   0  12   2   55.16    2.51
   0  12   2   53.47    1.92
   0  12   2   53.02    1.99
   0 -12  -3   10.63    1.03
   0 -12  -3    9.82    0.96
   0  12   3    9.38    1.26
   0  12   3   11.37    1.18
   0 -12  -3   10.71    0.96
   0 -12  -3   10.49    1.03
   0  12   3    8.05    0.96
   0  12   3   10.26    1.03
   0 -12  -4    1.18    0.74
   0 -12  -4    1.26    0.59
   0  12   4    1.77    0.96
   0  12   4    0.89    0.74
   0 -12  -4    0.44    0.66
   0 -12  -4    0.81    0.66
   0  12   4    0.81    0.74
   0  12   4    0.81    0.66
   0 -12  -5   61.96    2.44
   0 -12  -5   61.96    2.44
   0  12   5   59.74    2.73
   0  12   5   63.73    2.66
   0 -12  -5   58.34    2.14
   0 -12  -5   61.81    2.07
   0  12   5   57.97    2.07
   0  12   5   58.49    2.14
   0 -12  -6    7.90    0.96
   0 -12  -6    8.12    0.96
   0  12   6    8.79    1.03
   0  12   6    7.83    1.26
   0 -12  -6    9.30    0.96
   0 -12  -6    8.49    0.96
   0  12   6    8.42    1.03
   0  12   6    8.05    0.89
   0 -12  -7    7.68    0.96
   0 -12  -7    8.49    1.03
   0  12   7    6.79    1.03
   0  12   7    8.05    1.40
   0 -12  -7    8.86    1.03
   0 -12  -7    8.20    0.89
   0  12   7    8.79    0.96
   0  12   7    7.38    0.96
   0 -12  -8   12.92    1.18
   0 -12  -8   15.51    1.33
   0  12   8   13.14    1.62
   0  12   8   11.30    1.26
   0 -12  -8   12.85    1.11
   0 -12  -8   14.55    1.11
   0  12   8   15.21    1.18
   0  12   8   13.88    1.18
   0 -12  -9    1.92    0.89
   0 -12  -9    3.99    0.89
   0  12   9    1.26    1.40
   0  12   9    2.36    0.89
   0 -12  -9    3.32    0.74
   0 -12  -9    2.95    0.81
   0  12   9    3.03    0.81
   0  12   9    3.32    0.81
   0 -12 -10    0.30    0.74
   0 -12 -10    0.74    0.96
   0  12  10    1.62    1.40
   0  12  10    0.15    0.74
   0 -12 -10   -0.52    0.59
   0 -12 -10    0.52    0.74
   0  12  10   -0.22    0.59
   0  12  10    0.00    0.66
   0 -12 -11   57.90    2.66
   0 -12 -11   60.78    2.73
   0  12  11   58.64    3.25
   0  12  11   66.24    2.88
   0 -12 -11   66.46    2.29
   0 -12 -11   63.58    2.36
   0  12  11   58.41    2.14
   0  12  11   65.28    2.44
   0 -12 -12    6.42    1.26
   0 -12 -12    9.67    1.26
   0  12  12    8.27    1.11
   0  12  12    7.31    1.70
   0 -12 -12   11.08    1.11
   0 -12 -12    9.82    1.03
   0  12  12    7.90    0.96
   0  12  12    8.79    1.11
   0 -12 -13   11.74    1.33
   0 -12 -13   14.18    1.55
   0 -12 -13   11.82    1.18
   0 -12 -13   13.66    1.11
   0  12  13   13.07    1.26
   0  12  13   13.14    1.11
   0 -12 -15   17.35    1.62
   0 -12 -15   23.48    1.85
   0 -12 -15   23.93    1.40
   0 -12 -15   24.37    1.55
   0  12  15   24.30    1.48
   0  12  15   19.79    1.55
   0 -12 -16   -0.22    1.03
   0 -12 -16    0.22    0.96
   0  12  16   -1.11    1.26
   0  12  16    0.52    0.81
   0 -12 -16    0.44    0.66
   0 -12 -16    0.52    0.59
   0  12  16   -0.37    0.59
   0  12  16   -0.74    0.74
   0 -12 -17    4.95    1.18
   0 -12 -17    4.28    1.55
   0  12  17    5.17    1.55
   0  12  17    3.84    1.03
   0 -12 -17    5.17    0.89
   0 -12 -17    4.28    0.81
   0  12  17    4.80    0.81
   0  12  17    5.61    0.96
   0 -12 -18   -0.15    1.11
   0 -12 -18    1.85    1.48
   0  12  18    0.30    0.81
   0  12  18   -0.37    1.40
   0 -12 -18   -0.15    0.59
   0 -12 -18   -0.44    0.66
   0  12  18   -0.89    0.74
   0  12  18    0.15    0.59
   0 -12 -19    1.03    1.48
   0 -12 -19    1.99    1.11
   0  12  19    1.70    0.96
   0  12  19    2.66    1.55
   0 -12 -19    1.92    0.74
   0 -12 -19    1.03    0.59
   0  12  19    1.62    0.66
   0  12  19    1.99    0.81
   0 -12 -20    3.91    1.55
   0 -12 -20    1.62    1.11
   0  12  20    2.95    1.55
   0  12  20    3.10    1.03
   0 -12 -20    4.14    0.74
   0 -12 -20    3.40    0.74
   0  12  20    4.28    0.81
   0  12  20    4.06    0.89
   0 -12 -21    0.37    1.26
   0 -12 -21    0.15    1.11
   0  12  21    2.07    1.26
   0  12  21    0.66    1.03
   0 -12 -21   -0.37    0.59
   0 -12 -21   -0.22    0.59
   0  12  21    0.15    0.59
   0 -13  15    0.22    0.81
   0 -13  15   -0.74    0.96
   0  13 -15   -1.03    1.11
   0  13 -15    0.44    1.18
   0 -13  14    2.81    1.18
   0  13 -14   -0.37    1.26
   0  13 -14   -0.07    1.03
   0 -13  13    1.99    1.40
   0 -13  13    2.58    1.11
   0  13 -13    0.59    1.26
   0  13 -13    2.29    1.26
   0 -13  13    3.99    0.44
   0 -13  13    4.50    0.44
   0  13 -13    3.62    0.59
   0  13 -13    4.21    0.52
   0 -13  12    1.77    0.96
   0 -13  12   -1.48    1.26
   0  13 -12    0.15    1.11
   0  13 -12    0.30    1.18
   0 -13  12    0.66    0.37
   0 -13  12    0.74    0.37
   0  13 -12    0.89    0.37
   0  13 -12    0.96    0.52
   0 -13  11    0.52    0.81
   0 -13  11    0.37    1.11
   0  13 -11   -0.07    1.03
   0  13 -11   -0.52    0.96
   0 -13  11    0.44    0.44
   0 -13  11   -0.15    0.37
   0  13 -11    0.37    0.52
   0  13 -11   -0.07    0.44
   0 -13  10   -0.30    0.89
   0 -13  10    1.33    1.03
   0  13 -10   -0.44    1.18
   0  13 -10   -0.44    0.96
   0 -13  10    0.74    0.44
   0 -13  10   -0.52    0.44
   0  13 -10    0.30    0.44
   0  13 -10    0.52    0.59
   0 -13   9    1.62    0.81
   0 -13   9    1.85    0.96
   0  13  -9    0.15    1.26
   0  13  -9    0.52    0.89
   0 -13   9    0.37    0.52
   0 -13   9    0.07    0.52
   0  13  -9    0.22    0.52
   0  13  -9    1.55    0.74
   0 -13   8    9.60    1.62
   0 -13   8   15.51    0.96
   0 -13   8   14.70    0.96
   0  13  -8   12.48    1.11
   0  13  -8   14.33    1.03
   0 -13   7    0.89    0.96
   0 -13   7    0.89    0.66
   0  13  -7   -0.15    0.81
   0  13  -7    1.33    1.18
   0 -13   7    0.66    0.66
   0 -13   7   -0.44    0.52
   0  13  -7    0.96    0.66
   0  13  -7    0.37    0.59
   0 -13   6   16.84    1.40
   0 -13   6   14.03    1.40
   0 -13   6   16.32    1.11
   0 -13   6   15.73    1.11
   0 -13   5    1.03    0.66
   0 -13   5    0.37    0.81
   0  13  -5    1.03    0.74
   0  13  -5    0.89    0.96
   0 -13   5   -0.07    0.59
   0 -13   4    0.44    0.74
   0 -13   4    1.18    0.59
   0  13  -4    0.30    0.96
   0  13  -4    0.89    0.74
   0 -13   3    1.92    0.66
   0 -13   3    1.70    0.81
   0  13  -3    1.70    1.03
   0  13  -3    1.85    0.81
   0 -13   3    3.62    0.66
   0  13  -3    1.70    0.81
   0  13  -3    1.70    0.74
   0 -13   2    0.59    0.74
   0 -13   2    0.30    0.59
   0  13  -2    0.07    0.89
   0  13  -2    0.66    0.66
   0 -13   2   -0.07    0.59
   0 -13   2    0.07    0.59
   0  13  -2    0.89    0.66
   0  13  -2    0.52    0.66
   0 -13   1   12.63    1.26
   0 -13   1   14.77    1.11
   0  13  -1   13.96    1.33
   0  13  -1   13.66    1.40
   0  13  -1   14.99    1.18
   0  13  -1   13.07    1.11
   0 -13   0    2.73    0.66
   0 -13   0    3.03    0.81
   0  13   0    3.10    0.96
   0  13   0    2.95    0.89
   0 -13   0    4.36    0.74
   0 -13   0    2.73    0.74
   0  13   0    4.58    0.81
   0  13   0    2.95    0.81
   0 -13  -1   19.57    1.26
   0 -13  -1   19.20    1.48
   0  13   1   17.87    1.48
   0  13   1   16.02    1.48
   0 -13  -1   19.79    1.26
   0 -13  -1   16.69    1.18
   0  13   1   17.50    1.26
   0 -13  -2   40.47    1.99
   0 -13  -2   36.04    1.77
   0  13   2   40.39    2.22
   0  13   2   37.22    2.07
   0 -13  -2   38.18    1.70
   0 -13  -2   36.78    1.70
   0  13   2   37.59    1.70
   0  13   2   36.04    1.77
   0 -13  -3   26.51    1.48
   0 -13  -3   24.15    1.48
   0  13   3   25.33    1.62
   0  13   3   24.52    1.77
   0 -13  -3   21.64    1.40
   0 -13  -3   26.29    1.48
   0 -13  -4   16.02    1.18
   0 -13  -4   17.28    1.33
   0  13   4   17.72    1.40
   0  13   4   15.14    1.55
   0 -13  -4   17.13    1.26
   0 -13  -4   18.98    1.26
   0  13   4   17.43    1.33
   0  13   4   16.47    1.18
   0 -13  -5   28.14    1.62
   0 -13  -5   32.20    1.62
   0  13   5   31.31    2.14
   0  13   5   27.40    1.77
   0 -13  -5   27.99    1.55
   0 -13  -5   28.87    1.48
   0  13   5   27.10    1.48
   0  13   5   28.28    1.62
   0 -13  -6   15.21    1.18
   0 -13  -6   14.99    1.26
   0  13   6   14.25    1.33
   0  13   6   13.59    1.62
   0 -13  -6   13.81    1.11
   0 -13  -6   13.74    1.18
   0  13   6   13.51    1.18
   0  13   6   11.67    1.03
   0 -13  -7    3.40    0.81
   0 -13  -7    4.58    0.89
   0  13   7    5.61    0.96
   0  13   7    3.40    1.40
   0 -13  -7    4.80    0.81
   0 -13  -7    4.95    0.89
   0  13   7    5.69    0.89
   0  13   7    4.65    0.89
   0 -13  -8   12.11    1.26
   0 -13  -8   12.11    1.18
   0  13   8   13.74    1.33
   0  13   8   12.18    1.77
   0 -13  -8   13.14    1.18
   0 -13  -8   14.10    1.11
   0  13   8   13.59    1.18
   0  13   8   16.39    1.33
   0 -13  -9    7.38    1.03
   0 -13  -9    6.28    1.11
   0  13   9    7.83    1.70
   0  13   9    7.09    1.11
   0 -13  -9    9.01    1.03
   0 -13  -9    7.24    0.89
   0  13   9    6.65    0.96
   0  13   9    6.13    0.89
   0 -13 -10    9.45    1.18
   0 -13 -10    8.20    1.26
   0  13  10    9.38    1.85
   0  13  10    7.98    1.18
   0 -13 -10    8.42    1.03
   0 -13 -10    7.31    0.89
   0  13  10    9.30    1.11
   0  13  10    8.49    1.03
   0 -13 -11    1.70    0.89
   0 -13 -11    1.99    1.11
   0  13  11    1.40    1.48
   0  13  11    2.22    0.96
   0 -13 -11    3.03    0.81
   0 -13 -11    1.99    0.66
   0  13  11    2.73    0.89
   0  13  11    2.29    0.74
   0 -13 -12    9.67    1.26
   0 -13 -12    7.61    1.48
   0  13  12    5.17    1.77
   0  13  12    8.49    1.33
   0 -13 -12   11.89    1.18
   0 -13 -12    9.90    1.11
   0  13  12    9.53    1.26
   0  13  12    9.38    1.03
   0  13  13    4.58    1.92
   0 -13 -13    0.59    0.66
   0  13  13   -0.37    0.81
   0 -13 -14   16.76    1.77
   0 -13 -14   16.99    1.62
   0  13  14   14.47    1.48
   0  13  14   14.62    2.14
   0  13  14   18.91    1.48
   0  13  14   14.40    1.26
   0 -13 -15    1.55    1.03
   0 -13 -15    2.29    1.26
   0  13  15    1.40    0.89
   0  13  15    4.65    1.62
   0 -13 -15    2.58    0.81
   0 -13 -15    2.73    0.74
   0  13  15    1.55    0.89
   0  13  15    2.29    0.74
   0 -13 -16    0.96    1.11
   0 -13 -16   -0.15    0.96
   0  13  16    1.18    0.89
   0  13  16   -1.11    1.33
   0 -13 -16    0.66    0.59
   0 -13 -16    0.15    0.74
   0  13  16   -0.22    0.59
   0  13  16   -0.15    0.74
   0 -13 -17   10.56    1.55
   0 -13 -17    9.67    1.77
   0 -13 -17   10.34    1.11
   0 -13 -17   12.48    1.03
   0  13  17    9.67    1.03
   0  13  17   11.00    1.18
   0 -13 -18    0.07    1.03
   0 -13 -18    1.03    1.40
   0  13  18    0.81    0.89
   0  13  18    0.52    1.48
   0 -13 -18    1.11    0.66
   0 -13 -18   -0.07    0.52
   0  13  18    1.48    0.74
   0  13  18    0.22    0.59
   0 -13 -19    2.66    1.33
   0 -13 -19    0.66    1.40
   0  13  19    2.95    1.03
   0  13  19    0.00    1.40
   0 -13 -19    1.62    0.74
   0 -13 -19    2.14    0.66
   0  13  19    2.81    0.81
   0  13  19    1.77    0.66
   0 -13 -20    1.18    1.33
   0 -13 -20    1.62    1.33
   0  13  20   -0.15    1.33
   0  13  20    1.33    0.96
   0 -13 -20    1.92    0.74
   0 -13 -20    0.30    0.59
   0  13  20    2.36    0.81
   0  13  20    1.26    0.66
   0 -14  14   -0.37    0.89
   0 -14  14    0.37    0.96
   0  14 -14   -1.26    1.11
   0  14 -14    0.74    1.11
   0 -14  13   -0.66    1.03
   0  14 -13   -1.62    1.18
   0  14 -13    0.81    1.11
   0 -14  12    0.96    1.11
   0 -14  12    1.18    1.03
   0  14 -12    1.18    1.03
   0  14 -12    1.77    1.26
   0 -14  12    0.30    0.37
   0 -14  12    0.89    0.37
   0  14 -12    0.44    0.44
   0  14 -12    0.81    0.44
   0 -14  11    0.37    0.89
   0 -14  11    0.52    1.11
   0  14 -11   -1.18    1.11
   0  14 -11    2.14    1.18
   0 -14  11    0.74    0.44
   0 -14  11    0.81    0.44
   0  14 -11    0.66    0.44
   0  14 -11    1.55    0.59
   0 -14  10   -0.74    0.89
   0 -14  10    0.66    1.26
   0  14 -10    2.07    1.26
   0  14 -10    0.37    0.96
   0 -14  10   -0.07    0.52
   0 -14  10    0.22    0.44
   0  14 -10   -0.22    0.59
   0  14 -10    0.00    0.44
   0 -14   9    0.81    1.18
   0 -14   9    2.22    0.89
   0  14  -9    1.70    1.26
   0  14  -9    0.96    1.03
   0 -14   9    1.77    0.52
   0 -14   9    2.51    0.59
   0  14  -9    2.51    0.59
   0  14  -9    2.51    0.74
   0 -14   8   -0.30    0.81
   0 -14   8    0.22    0.96
   0  14  -8    0.07    1.18
   0  14  -8    0.15    0.89
   0 -14   8    0.52    0.59
   0 -14   8   -0.52    0.59
   0  14  -8    0.07    0.59
   0  14  -8   -0.44    0.66
   0 -14   7    2.95    0.89
   0 -14   7    1.33    0.96
   0  14  -7    0.74    1.18
   0  14  -7    1.33    0.89
   0 -14   7    0.66    0.66
   0 -14   6    1.40    0.96
   0  14  -6    0.81    0.96
   0 -14   6    1.92    0.66
   0 -14   5    1.99    0.81
   0  14  -5    0.44    1.11
   0 -14   5    1.70    0.66
   0 -14   5    1.77    0.66
   0  14  -5    1.77    0.74
   0  14  -5    2.29    0.74
   0 -14   4    0.74    0.81
   0 -14   4    0.96    0.66
   0  14  -4    0.52    0.81
   0  14  -4   -0.89    0.96
   0 -14   4    0.30    0.59
   0 -14   4    0.37    0.66
   0  14  -4    1.11    0.66
   0  14  -4    0.44    0.74
   0 -14   3    7.02    1.11
   0 -14   3    7.46    0.96
   0  14  -3    4.65    1.26
   0  14  -3    6.79    1.11
   0 -14   3    5.69    0.81
   0 -14   3    7.61    0.89
   0  14  -3    7.31    0.96
   0  14  -3    5.39    0.89
   0 -14   2    3.54    0.74
   0 -14   2    3.69    0.96
   0  14  -2    3.47    1.11
   0  14  -2    2.51    0.89
   0 -14   2    3.77    0.81
   0 -14   2    3.62    0.74
   0  14  -2    3.54    0.81
   0  14  -2    3.25    0.81
   0 -14   1    0.81    0.59
   0 -14   1    1.33    0.81
   0  14  -1    2.14    0.96
   0  14  -1    0.07    0.74
   0 -14   1    0.81    0.66
   0 -14   1    0.37    0.66
   0  14  -1    1.26    0.74
   0  14  -1    1.18    0.74
   0 -14   0   27.55    1.55
   0 -14   0   30.43    1.85
   0  14   0   27.69    1.85
   0  14   0   29.54    1.92
   0 -14   0   25.55    1.48
   0 -14   0   28.06    1.48
   0  14   0   29.61    1.62
   0  14   0   28.06    1.55
   0 -14  -1   14.77    1.18
   0 -14  -1   14.40    1.40
   0  14   1   13.44    1.48
   0  14   1   15.80    1.48
   0 -14  -1   16.99    1.26
   0 -14  -1   15.95    1.18
   0  14   1   16.84    1.26
   0  14   1   17.43    1.33
   0 -14  -2    8.64    1.18
   0 -14  -2    9.16    0.96
   0  14   2    9.90    1.26
   0  14   2    9.23    1.33
   0 -14  -2    8.71    0.96
   0 -14  -2   10.26    1.03
   0  14   2    9.08    1.11
   0 -14  -3    1.62    0.66
   0 -14  -3    2.29    0.81
   0  14   3    2.22    1.11
   0  14   3    2.58    0.96
   0 -14  -3    2.88    0.81
   0 -14  -3    2.73    0.74
   0  14   3    2.95    0.81
   0  14   3    3.40    0.89
   0 -14  -4    1.26    0.59
   0 -14  -4    1.18    0.74
   0  14   4    1.03    0.81
   0  14   4    0.74    1.11
   0 -14  -4   -0.44    0.66
   0 -14  -4   -0.66    0.59
   0  14   4   -0.37    0.66
   0  14   4    0.66    0.74
   0 -14  -5    0.15    0.81
   0 -14  -5    1.40    0.66
   0  14   5    1.62    1.11
   0  14   5    1.48    0.81
   0 -14  -5    2.14    0.74
   0 -14  -5    1.70    0.81
   0  14   5    2.22    0.81
   0  14   5    1.40    0.74
   0 -14  -6   24.59    1.70
   0 -14  -6   19.64    1.40
   0  14   6   19.42    1.99
   0  14   6   21.42    1.62
   0 -14  -6   19.27    1.40
   0 -14  -6   19.72    1.33
   0  14   6   20.83    1.48
   0  14   6   20.90    1.40
   0 -14  -7   36.04    1.99
   0 -14  -7   35.15    1.85
   0 -14  -7   35.89    1.85
   0 -14  -7   37.07    1.70
   0  14   7   35.23    1.77
   0  14   7   36.78    1.92
   0 -14  -8    1.99    0.96
   0 -14  -8    1.70    0.81
   0  14   8    1.11    0.89
   0  14   8    1.55    1.40
   0 -14  -8    3.10    0.74
   0 -14  -8    2.29    0.81
   0  14   8    2.95    0.81
   0  14   8    3.03    0.89
   0 -14  -9    1.99    0.81
   0 -14  -9    1.92    0.96
   0  14   9    1.92    1.62
   0  14   9    2.58    0.96
   0 -14  -9    0.96    0.66
   0 -14  -9    0.74    0.74
   0  14   9    1.48    0.81
   0  14   9    1.55    0.74
   0 -14 -10    5.24    1.03
   0 -14 -10    2.73    1.33
   0  14  10    5.46    1.26
   0  14  10    3.77    1.85
   0 -14 -10    4.65    0.96
   0 -14 -10    5.83    0.81
   0  14  10    4.95    0.89
   0  14  10    4.73    0.96
   0 -14 -12    3.18    1.03
   0 -14 -12    3.77    1.26
   0  14  12    2.14    1.62
   0  14  12    4.06    1.18
   0 -14 -12    3.99    0.81
   0 -14 -12    5.61    0.96
   0  14  12    4.58    0.89
   0  14  12    4.14    0.89
   0 -14 -13    0.07    0.81
   0 -14 -13   -1.48    1.11
   0  14  13    0.22    1.55
   0  14  13    1.18    1.03
   0 -14 -13   -0.30    0.66
   0 -14 -13    1.33    0.66
   0  14  13   -0.15    0.74
   0  14  13    0.07    0.66
   0  14  14    3.69    1.18
   0  14  14    4.43    1.77
   0 -14 -14    4.50    0.89
   0 -14 -14    5.83    0.89
   0  14  14    3.18    0.81
   0  14  14    5.91    1.03
   0 -14 -15   -0.52    1.18
   0 -14 -15    0.96    0.96
   0  14  15   -1.92    1.55
   0  14  15   -0.22    0.81
   0 -14 -15    0.07    0.66
   0 -14 -15    0.07    0.59
   0  14  15   -0.22    0.59
   0  14  15   -0.74    0.74
   0 -14 -16    4.87    1.48
   0 -14 -16    6.50    1.33
   0  14  16    6.50    1.18
   0  14  16    4.28    1.85
   0 -14 -16    6.13    0.89
   0 -14 -16    6.65    0.96
   0  14  16    7.98    0.96
   0  14  16    5.98    1.03
   0 -14 -17   -0.59    1.26
   0 -14 -17    0.66    1.03
   0  14  17    0.74    1.48
   0  14  17   -0.44    0.89
   0 -14 -17    0.30    0.74
   0 -14 -17   -0.15    0.59
   0  14  17    0.52    0.59
   0  14  17    0.00    0.74
   0 -14 -18    4.06    1.55
   0 -14 -18    4.87    1.40
   0  14  18    2.36    1.55
   0  14  18    6.20    1.18
   0 -14 -18    5.17    0.81
   0 -14 -18    5.02    0.89
   0  14  18    5.39    0.89
   0  14  18    5.17    0.89
   0 -14 -19   -0.44    1.33
   0 -14 -19    1.33    1.26
   0  14  19    1.48    1.40
   0  14  19   -0.15    0.96
   0 -14 -19   -0.30    0.66
   0 -14 -19   -0.52    0.52
   0  14  19   -0.96    0.66
   0  14  19   -0.74    0.59
   0 -15  12    0.89    0.96
   0  15 -12   -0.30    1.11
   0  15 -12    0.74    1.11
   0 -15  11    0.66    1.03
   0 -15  11    1.33    1.18
   0  15 -11    0.89    1.03
   0  15 -11    1.55    1.33
   0  15 -11    0.44    0.44
   0  15 -11    0.66    0.52
   0 -15  10   -0.07    1.18
   0 -15  10   -0.37    0.96
   0  15 -10   -0.30    1.26
   0  15 -10   -0.30    1.03
   0 -15  10    0.22    0.37
   0 -15  10   -0.15    0.44
   0  15 -10    0.52    0.44
   0  15 -10   -0.89    0.52
   0 -15   9    1.18    1.18
   0 -15   9    0.59    1.03
   0  15  -9   -0.44    1.11
   0  15  -9    1.70    1.26
   0 -15   9    0.44    0.52
   0  15  -9    0.89    0.44
   0  15  -9   -0.22    0.59
   0 -15   8    7.46    1.26
   0 -15   8    5.76    1.48
   0  15  -8    4.95    1.40
   0  15  -8    5.91    1.40
   0 -15   8    7.46    0.81
   0 -15   7    6.79    1.18
   0 -15   7    5.69    1.40
   0  15  -7    4.50    1.40
   0  15  -7    5.46    1.40
   0 -15   7    8.20    0.96
   0 -15   7    8.12    0.89
   0  15  -7    7.75    0.89
   0  15  -7    5.83    0.89
   0 -15   6    3.84    1.26
   0 -15   6    5.10    1.03
   0  15  -6    3.77    1.40
   0  15  -6    4.43    1.26
   0 -15   6    6.35    0.89
   0 -15   6    5.98    0.81
   0  15  -6    7.02    0.89
   0  15  -6    6.50    0.96
   0 -15   5    1.33    0.81
   0 -15   5    1.03    0.96
   0  15  -5    1.03    1.03
   0  15  -5    1.70    1.11
   0 -15   5    1.26    0.59
   0 -15   5    1.11    0.66
   0  15  -5    1.62    0.74
   0  15  -5   -0.07    0.66
   0 -15   4    1.03    0.74
   0 -15   4    1.99    0.96
   0  15  -4    1.03    0.96
   0  15  -4    1.62    1.03
   0 -15   4    0.52    0.59
   0 -15   4    0.89    0.66
   0  15  -4    0.30    0.74
   0  15  -4    0.74    0.66
   0 -15   3    1.99    1.03
   0  15  -3    2.95    1.11
   0 -15   3    3.77    0.81
   0 -15   3    4.80    0.74
   0  15  -3    3.77    0.89
   0  15  -3    5.17    0.89
   0 -15   2   -0.15    0.66
   0 -15   2    0.66    0.59
   0  15  -2    0.74    0.74
   0  15  -2   -0.44    0.74
   0 -15   1    0.00    0.59
   0  15  -1   -1.03    0.96
   0 -15   1    1.18    0.66
   0 -15   1    0.30    0.66
   0  15  -1    0.22    0.74
   0  15  -1    0.59    0.74
   0 -15   0    2.58    1.03
   0 -15   0    3.91    0.81
   0  15   0    5.02    1.18
   0  15   0    5.54    1.11
   0 -15   0    5.02    0.81
   0 -15   0    5.32    0.89
   0  15   0    2.36    0.74
   0  15   0    4.21    0.89
   0 -15  -1    5.10    1.11
   0 -15  -1    5.76    0.89
   0  15   1    7.90    1.26
   0  15   1    6.20    1.18
   0 -15  -1    6.28    0.89
   0 -15  -1    5.24    0.89
   0  15   1    8.20    0.96
   0  15   1    8.12    1.03
   0 -15  -2   26.14    1.48
   0 -15  -2   24.74    1.48
   0  15   2   27.84    1.62
   0  15   2   25.63    1.55
   0 -15  -3    7.98    0.96
   0 -15  -3    5.54    1.03
   0  15   3    6.42    1.18
   0  15   3    7.83    1.40
   0 -15  -3    6.06    0.96
   0 -15  -3    6.79    0.89
   0  15   3    6.79    0.96
   0  15   3    6.65    1.03
   0 -15  -4   29.47    1.70
   0 -15  -4   25.26    1.70
   0  15   4   26.14    2.14
   0  15   4   24.37    1.77
   0 -15  -4   25.55    1.48
   0 -15  -4   24.15    1.48
   0  15   4   25.85    1.62
   0  15   4   26.51    1.55
   0 -15  -5    3.99    0.81
   0 -15  -5    2.58    0.89
   0  15   5    2.95    0.96
   0  15   5    4.43    1.33
   0 -15  -5    3.84    0.81
   0 -15  -5    3.69    0.74
   0  15   5    2.73    0.89
   0  15   5    3.10    0.89
   0 -15  -6   40.03    1.99
   0 -15  -6   38.40    2.14
   0  15   6   38.47    2.73
   0  15   6   41.35    2.22
   0 -15  -6   35.23    2.07
   0  15   6   41.21    1.99
   0  15   6   39.29    1.85
   0 -15  -7    2.36    0.81
   0  15   7    1.92    1.03
   0 -15  -7    2.14    0.74
   0 -15  -7    2.14    0.89
   0 -15  -8    2.36    0.81
   0 -15  -8    1.26    0.66
   0  15   8    0.81    0.81
   0  15   8    2.14    0.74
   0 -15  -9   22.89    1.70
   0 -15  -9   22.89    1.55
   0  15   9   22.75    1.48
   0 -15 -10    0.44    0.74
   0 -15 -10   -0.74    1.03
   0  15  10    1.55    1.55
   0  15  10    2.22    0.96
   0 -15 -10   -0.07    0.66
   0  15  10    1.11    0.81
   0 -15 -11   -0.44    1.03
   0 -15 -11    0.37    0.89
   0  15  11    0.37    1.03
   0  15  11    1.48    1.55
   0 -15 -11    0.30    0.59
   0 -15 -11    0.00    0.74
   0  15  11    0.74    0.74
   0  15  11    0.74    0.66
   0 -15 -12    0.15    0.89
   0 -15 -12   -0.37    1.11
   0  15  12    1.26    1.55
   0  15  12    0.30    1.11
   0 -15 -12    0.30    0.59
   0 -15 -12    1.11    0.74
   0  15  12    0.66    0.66
   0  15  12    1.33    0.81
   0 -15 -13    5.17    1.40
   0 -15 -13    7.38    1.26
   0  15  13    5.61    1.40
   0  15  13    1.26    1.62
   0 -15 -13    8.27    1.03
   0 -15 -13    9.08    0.96
   0  15  13    6.13    1.03
   0  15  13    7.53    0.96
   0 -15 -14    1.03    1.03
   0 -15 -14    0.37    1.26
   0  15  14   -1.55    1.26
   0  15  14   -1.55    1.55
   0 -15 -14   -0.89    0.66
   0 -15 -14    1.26    0.59
   0  15  14    1.48    0.81
   0  15  14    1.62    0.66
   0 -15 -15    0.74    1.33
   0 -15 -15    1.26    1.03
   0  15  15   -1.18    1.70
   0  15  15    1.18    1.18
   0 -15 -15   -0.74    0.66
   0 -15 -15   -0.22    0.59
   0  15  15    1.03    0.59
   0  15  15   -0.30    0.66
   0 -15 -16    1.18    1.33
   0 -15 -16    3.99    1.70
   0  15  16    2.14    1.70
   0  15  16    1.85    1.18
   0 -15 -16    4.80    0.81
   0 -15 -16    4.58    0.89
   0  15  16    4.43    0.89
   0  15  16    3.91    0.74
   0 -15 -17    1.11    1.26
   0 -15 -17   -0.66    1.11
   0  15  17    0.07    1.11
   0  15  17    1.11    1.62
   0 -15 -17    0.22    0.66
   0 -15 -17   -0.15    0.59
   0  15  17    0.37    0.74
   0  15  17    1.11    0.59
   0 -15 -18    0.81    1.11
   0 -15 -18    3.03    1.33
   0  15  18   -0.59    1.40
   0  15  18   -0.96    0.89
   0 -15 -18   -0.07    0.66
   0 -15 -18    0.89    0.59
   0  15  18   -0.07    0.74
   0  15  18    0.30    0.59
   0 -16  11    0.66    1.11
   0  16 -11   -0.52    1.11
   0  16 -11    0.22    1.18
   0 -16  10    1.26    0.89
   0 -16  10   -0.30    0.89
   0  16 -10    0.59    1.26
   0  16 -10   -0.52    1.33
   0  16 -10    0.52    0.52
   0 -16   9    0.81    1.03
   0 -16   9   -0.37    1.03
   0  16  -9   -0.15    1.26
   0  16  -9   -0.96    1.18
   0 -16   9   -0.07    0.44
   0 -16   8   -0.44    1.11
   0 -16   8    0.66    1.11
   0  16  -8    0.74    1.11
   0  16  -8   -1.03    1.03
   0 -16   8   -0.52    0.52
   0 -16   8    0.74    0.52
   0  16  -8   -0.22    0.52
   0  16  -8    0.96    0.66
   0 -16   7    0.00    1.11
   0 -16   7    0.15    1.18
   0  16  -7    1.11    1.11
   0  16  -7    2.14    1.26
   0 -16   7    1.85    0.66
   0 -16   7    0.15    0.52
   0  16  -7    2.81    0.74
   0  16  -7    1.26    0.59
   0 -16   6    1.11    0.89
   0 -16   6    2.07    1.26
   0  16  -6    0.74    1.18
   0  16  -6    1.33    1.11
   0 -16   6    1.03    0.59
   0 -16   6    0.96    0.59
   0  16  -6    0.22    0.59
   0  16  -6    1.26    0.66
   0 -16   5    4.50    1.40
   0 -16   5    1.77    0.81
   0  16  -5    3.40    1.33
   0  16  -5    2.51    1.26
   0 -16   5    2.14    0.66
   0 -16   5    2.44    0.66
   0  16  -5    2.29    0.74
   0  16  -5    2.81    0.74
   0 -16   4   -0.96    1.18
   0 -16   4    0.96    0.74
   0  16  -4    1.99    1.11
   0  16  -4    0.15    1.03
   0 -16   4    0.96    0.66
   0 -16   4    0.44    0.59
   0  16  -4    0.59    0.66
   0  16  -4   -0.07    0.66
   0  16  -3    3.62    1.26
   0  16  -3    5.54    1.40
   0 -16   3    7.83    0.89
   0 -16   3    5.91    0.89
   0  16  -3    5.83    0.96
   0  16  -3    6.94    0.96
   0  16  -2    6.50    1.33
   0  16  -2    9.30    1.48
   0 -16   2    8.86    0.96
   0 -16   2    8.94    0.96
   0  16  -2    9.97    1.11
   0  16  -2   10.19    1.11
   0 -16   1    0.15    1.03
   0 -16   1    2.22    0.74
   0  16  -1   -0.07    1.03
   0  16  -1   -0.07    0.96
   0 -16   1    1.18    0.66
   0 -16   1    1.03    0.66
   0  16  -1    1.11    0.74
   0  16  -1    0.52    0.74
   0 -16   0    1.77    1.11
   0 -16   0    2.44    0.74
   0  16   0    2.22    1.03
   0  16   0    1.92    1.18
   0 -16   0    1.77    0.74
   0 -16   0    2.07    0.66
   0  16   0    1.55    0.81
   0  16   0    2.14    0.74
   0 -16  -1    3.84    0.81
   0 -16  -1    2.58    1.11
   0  16   1    4.87    1.18
   0  16   1    3.77    1.26
   0 -16  -1    4.73    0.89
   0 -16  -1    3.03    0.74
   0  16   1    5.91    0.96
   0  16   1    4.87    0.89
   0 -16  -2    0.74    0.89
   0 -16  -2    1.03    0.66
   0  16   2    1.99    1.03
   0  16   2   -0.96    1.26
   0 -16  -2    2.95    0.81
   0 -16  -2    1.85    0.74
   0  16   2    2.36    0.81
   0  16   2    1.40    0.74
   0 -16  -3   -0.66    0.81
   0 -16  -3    0.30    0.66
   0  16   3    0.37    0.96
   0  16   3   -1.33    1.26
   0 -16  -3    0.52    0.59
   0 -16  -3   -0.37    0.66
   0  16   3   -0.37    0.74
   0  16   3    1.77    0.81
   0 -16  -4    6.79    0.96
   0 -16  -4    4.80    1.11
   0  16   4    4.50    1.48
   0  16   4    7.02    1.18
   0 -16  -4    8.34    0.96
   0 -16  -4    6.65    0.96
   0  16   4    7.24    1.03
   0  16   4    7.53    1.03
   0 -16  -5    0.66    0.66
   0 -16  -5    0.52    0.89
   0  16   5    1.26    0.96
   0  16   5    1.11    1.40
   0 -16  -5    0.59    0.66
   0 -16  -5    1.55    0.74
   0  16   5    1.26    0.89
   0 -16  -6   38.40    2.22
   0 -16  -6   35.15    1.92
   0 -16  -6   36.41    1.70
   0 -16  -6   33.90    1.77
   0  16   6   35.82    1.92
   0  16   6   35.82    1.85
   0 -16  -7    3.03    1.03
   0 -16  -7    4.14    0.89
   0  16   7    5.54    1.18
   0  16   7    1.55    1.77
   0 -16  -7    3.62    0.89
   0  16   7    3.62    0.89
   0  16   7    3.10    1.03
   0 -16  -8   10.78    1.40
   0 -16  -8   11.67    1.26
   0  16   8    7.83    2.07
   0  16   8   11.52    1.40
   0 -16  -8   11.30    1.18
   0 -16  -9    0.00    0.96
   0 -16  -9    0.07    0.74
   0  16   9   -0.52    0.89
   0  16   9   -0.44    1.62
   0 -16  -9    0.22    0.59
   0 -16  -9    1.18    0.81
   0  16   9    0.74    0.66
   0  16   9   -0.44    0.74
   0 -16 -10   -0.52    1.03
   0 -16 -10    0.07    0.81
   0  16  10    1.11    1.11
   0  16  10    1.40    1.70
   0 -16 -10    0.89    0.59
   0 -16 -10    0.74    0.74
   0  16  10    0.52    0.66
   0  16  10   -0.74    0.74
   0 -16 -11    1.18    1.18
   0 -16 -11    1.11    0.81
   0  16  11   -0.37    1.03
   0  16  11    0.89    1.70
   0 -16 -11    0.89    0.66
   0 -16 -11    0.66    0.66
   0 -16 -12    0.74    0.89
   0 -16 -12    0.96    1.18
   0  16  12   -0.74    1.62
   0  16  12    0.89    1.18
   0 -16 -12    0.52    0.66
   0 -16 -12   -0.07    0.59
   0  16  12    0.07    0.74
   0  16  12    0.22    0.59
   0 -16 -13    2.07    1.33
   0 -16 -13    0.66    1.03
   0  16  13   -1.40    1.77
   0  16  13    3.10    1.48
   0 -16 -13    1.77    0.66
   0 -16 -13    3.25    0.81
   0  16  13    0.81    0.74
   0  16  13    2.22    0.74
   0 -16 -14   -0.89    1.11
   0 -16 -14    1.26    1.40
   0  16  14   -1.26    1.70
   0  16  14    0.22    1.26
   0 -16 -14    0.74    0.59
   0 -16 -14    1.92    0.66
   0  16  14    1.26    0.66
   0  16  14    0.15    0.66
   0 -16 -15   -0.74    1.18
   0 -16 -15   -0.15    1.48
   0  16  15    0.89    1.18
   0  16  15    0.00    1.77
   0 -16 -15   -0.44    0.59
   0 -16 -15    0.59    0.66
   0  16  15    0.22    0.74
   0  16  15   -0.07    0.59
   0 -16 -16   -0.66    1.55
   0 -16 -16    1.26    1.18
   0  16  16   -0.44    1.33
   0  16  16    0.37    1.62
   0 -16 -16    0.59    0.59
   0 -16 -16    0.81    0.66
   0  16  16    0.37    0.59
   0  16  16    1.03    0.74
   0 -16 -17   -0.07    1.40
   0 -16 -17   -0.22    0.89
   0  16  17    1.48    1.62
   0  16  17    0.44    1.11
   0 -16 -17    1.03    0.59
   0 -16 -17   -0.30    0.59
   0  16  17    0.15    0.59
   0  16  17    0.66    0.74
   0 -17   9    0.66    1.03
   0 -17   9   -0.37    1.03
   0  17  -9    0.22    1.33
   0  17  -9   -1.85    1.26
   0  17  -9    2.58    0.74
   0  17  -9    3.69    0.74
   0 -17   8    0.81    1.03
   0 -17   8   -0.22    1.03
   0  17  -8   -1.70    1.26
   0  17  -8   -1.62    1.26
   0 -17   8    0.00    0.52
   0 -17   8    1.03    0.59
   0  17  -8   -0.59    0.59
   0  17  -8    0.15    0.74
   0 -17   7    0.44    1.18
   0 -17   7    1.11    1.26
   0  17  -7   -0.81    1.26
   0  17  -7    1.33    1.48
   0 -17   7    0.96    0.59
   0 -17   7    1.77    0.59
   0  17  -7    2.51    0.74
   0  17  -7    2.44    0.74
   0 -17   6    0.66    1.26
   0 -17   6    0.74    1.11
   0  17  -6    0.96    1.18
   0  17  -6   -0.30    1.11
   0 -17   6   -0.66    0.52
   0  17  -6    0.44    0.66
   0  17  -6   -0.30    0.66
   0 -17   5    0.00    1.33
   0 -17   5    1.26    1.03
   0  17  -5    0.66    1.18
   0  17  -5    1.18    1.33
   0 -17   5    2.14    0.66
   0 -17   5    1.92    0.66
   0  17  -5    1.92    0.74
   0  17  -5    2.22    0.66
   0 -17   4    0.81    1.40
   0 -17   4    2.88    1.03
   0  17  -4    2.36    1.40
   0  17  -4    2.95    1.33
   0 -17   4    2.73    0.74
   0 -17   4    2.29    0.66
   0  17  -4    3.91    0.74
   0  17  -4    2.14    0.74
   0 -17   3    0.81    0.81
   0 -17   3   -0.30    1.40
   0  17  -3    0.96    1.18
   0  17  -3   -0.15    1.18
   0 -17   3    0.81    0.66
   0 -17   3    0.66    0.59
   0  17  -3    1.33    0.74
   0  17  -3    1.03    0.66
   0 -17   2    1.77    1.55
   0 -17   2    2.29    0.81
   0  17  -2    1.85    1.33
   0  17  -2    1.03    1.18
   0 -17   2    2.29    0.66
   0 -17   2    1.33    0.66
   0  17  -2    0.15    0.66
   0  17  -2    1.18    0.74
   0 -17   1    0.22    1.26
   0 -17   1    0.07    0.74
   0  17  -1    1.40    1.33
   0  17  -1    1.99    1.11
   0 -17   1    0.22    0.59
   0 -17   1    0.52    0.59
   0  17  -1    0.96    0.74
   0  17  -1    0.81    0.66
   0 -17   0   -0.30    1.11
   0 -17   0    1.11    0.81
   0  17   0    0.81    1.11
   0  17   0   -0.37    1.18
   0 -17   0    1.33    0.66
   0 -17   0    0.07    0.59
   0  17   0    1.40    0.81
   0  17   0    1.26    0.66
   0 -17  -1    3.10    1.18
   0 -17  -1    3.62    0.89
   0  17   1    4.21    1.11
   0  17   1    3.54    1.48
   0 -17  -1    2.81    0.74
   0 -17  -1    3.18    0.74
   0  17   1    2.88    0.89
   0  17   1    2.44    0.81
   0 -17  -2    0.44    0.89
   0 -17  -2    0.52    0.66
   0  17   2   -0.59    1.40
   0  17   2    0.15    0.96
   0 -17  -2    1.03    0.74
   0 -17  -2    0.15    0.66
   0  17   2    0.00    0.74
   0  17   2    1.33    0.74
   0 -17  -3   12.26    1.11
   0 -17  -3   12.26    1.11
   0  17   3   11.89    1.18
   0  17   3   12.63    1.26
   0 -17  -4   -1.11    0.66
   0 -17  -4    1.48    0.96
   0  17   4   -0.44    1.48
   0  17   4   -0.81    0.96
   0 -17  -4   -0.52    0.66
   0 -17  -4   -0.22    0.66
   0  17   4   -0.07    0.74
   0  17   4    0.00    0.74
   0 -17  -5   -0.30    0.66
   0 -17  -5    2.36    1.03
   0  17   5   -1.77    1.55
   0  17   5    0.59    0.89
   0 -17  -5   -0.44    0.74
   0  17   5   -0.59    0.74
   0 -17  -6    1.85    0.96
   0 -17  -6    1.26    0.74
   0  17   6    1.03    0.89
   0  17   6    2.58    1.62
   0 -17  -6    0.22    0.66
   0 -17  -7    0.07    0.96
   0 -17  -7    0.81    0.74
   0  17   7    1.11    0.89
   0  17   7    1.26    1.77
   0 -17  -7    0.44    0.66
   0 -17  -7    1.40    0.74
   0  17   7    1.26    0.81
   0  17   7    0.66    0.89
   0 -17  -8    0.96    0.96
   0 -17  -8    0.52    0.74
   0  17   8    0.96    0.89
   0  17   8    1.26    1.85
   0 -17  -8   -0.07    0.66
   0 -17  -8   -0.22    0.66
   0  17   8    0.44    0.66
   0  17   8    0.66    0.81
   0 -17  -9   -0.66    0.81
   0 -17  -9   -0.89    0.96
   0  17   9    0.37    1.03
   0  17   9    1.48    1.77
   0  17   9   -0.30    0.59
   0  17   9    0.52    0.74
   0 -17 -10    0.15    0.81
   0 -17 -10    0.44    1.18
   0  17  10    3.77    1.18
   0  17  10    0.66    1.85
   0 -17 -10    1.26    0.66
   0 -17 -10    0.22    0.66
   0  17  10    0.07    0.74
   0  17  10    1.40    0.66
   0 -17 -11    3.18    1.33
   0 -17 -11    0.22    0.89
   0  17  11    2.07    1.92
   0  17  11    2.95    1.26
   0 -17 -11    2.14    0.74
   0 -17 -11    2.22    0.81
   0  17  11    0.89    0.81
   0  17  11    2.51    0.74
   0 -17 -12    2.07    1.40
   0 -17 -12   -0.15    0.96
   0  17  12   -0.74    1.18
   0  17  12   -1.99    1.77
   0 -17 -12    0.74    0.59
   0 -17 -12   -0.22    0.66
   0  17  12    0.07    0.74
   0  17  12    1.26    0.66
   0 -17 -13    0.00    1.11
   0 -17 -13    0.37    1.33
   0  17  13   -0.15    1.18
   0  17  13    1.11    1.85
   0 -17 -13   -0.15    0.59
   0 -17 -13    0.07    0.59
   0  17  13    0.44    0.74
   0  17  13    0.37    0.59
   0 -17 -14    1.03    1.11
   0 -17 -14   -0.30    1.40
   0  17  14    0.15    1.62
   0  17  14    0.59    1.26
   0 -17 -14   -0.37    0.59
   0 -17 -14    0.37    0.59
   0  17  14    0.30    0.66
   0  17  14    0.96    0.59
   0 -17 -15    3.54    1.70
   0 -17 -15    1.40    1.11
   0  17  15    1.77    1.77
   0  17  15    0.00    1.33
   0 -17 -15    3.10    0.74
   0 -17 -15    2.51    0.74
   0  17  15    3.47    0.74
   0  17  15    2.66    0.89
   0 -17 -16    0.44    0.89
   0  17  16    0.37    1.11
   0 -18   7   -0.15    0.96
   0  18  -7   -0.52    1.18
   0  18  -7    1.70    0.74
   0  18  -7    1.03    0.66
   0 -18   6    0.07    0.81
   0 -18   6    1.11    1.03
   0  18  -6   -0.07    1.18
   0  18  -6   -0.07    1.18
   0 -18   6    1.11    0.59
   0 -18   6    1.26    0.59
   0  18  -6    1.55    0.66
   0  18  -6    2.44    0.74
   0 -18   5    0.15    1.11
   0 -18   5   -0.30    1.18
   0  18  -5   -3.03    1.18
   0  18  -5   -0.07    1.40
   0 -18   5    2.14    0.59
   0 -18   5    2.58    0.66
   0  18  -5    2.36    0.81
   0  18  -5    2.66    0.74
   0  18  -4    0.30    1.26
   0  18  -4    2.29    1.40
   0 -18   4    3.77    0.74
   0 -18   4    1.62    0.66
   0  18  -4    2.22    0.74
   0  18  -4    2.07    0.66
   0  18  -3    4.73    1.48
   0  18  -3    5.02    1.70
   0 -18   3    5.61    0.81
   0 -18   3    4.43    0.81
   0  18  -3    4.06    0.74
   0  18  -3    6.79    0.96
   0 -18   2    0.44    0.89
   0 -18   2    2.07    1.40
   0  18  -2    0.07    1.48
   0  18  -2    0.37    1.11
   0 -18   2   -0.30    0.59
   0 -18   2    0.89    0.66
   0  18  -2   -0.30    0.66
   0  18  -2    0.59    0.66
   0 -18   1    1.48    0.96
   0 -18   1   -1.18    1.26
   0  18  -1    0.44    1.18
   0  18  -1    1.70    1.55
   0 -18   1    1.18    0.59
   0 -18   1    0.74    0.59
   0  18  -1    0.66    0.74
   0  18  -1    1.92    0.74
   0 -18   0    1.11    1.33
   0 -18   0    3.18    0.96
   0  18   0    2.22    1.55
   0  18   0    1.40    1.18
   0 -18   0    2.51    0.74
   0 -18   0    1.99    0.66
   0  18   0    1.26    0.74
   0  18   0    2.81    0.81
   0 -18  -1   -0.74    0.66
   0 -18  -1   -0.96    0.96
   0  18   1    0.15    1.18
   0  18   1   -0.07    1.55
   0 -18  -1    0.22    0.59
   0 -18  -1   -0.22    0.59
   0  18   1    0.00    0.66
   0  18   1    0.07    0.74
   0 -18  -2    1.26    1.11
   0 -18  -2    2.51    0.89
   0  18   2    4.21    1.26
   0  18   2    0.00    1.55
   0 -18  -2    1.70    0.74
   0 -18  -2    2.36    0.74
   0  18   2    3.10    0.89
   0  18   2    2.88    0.81
   0 -18  -3    0.66    0.74
   0 -18  -3    0.07    0.96
   0  18   3    0.59    1.11
   0  18   3    0.89    1.62
   0 -18  -3   -0.15    0.66
   0 -18  -4    0.66    0.81
   0 -18  -4    0.59    1.03
   0  18   4   -1.85    1.62
   0  18   4    1.11    1.11
   0 -18  -4    0.22    0.66
   0  18   4   -0.74    0.81
   0 -18  -5   -0.30    1.03
   0 -18  -5    0.30    0.74
   0  18   5    1.48    1.03
   0  18   5    0.59    1.70
   0 -18  -5   -0.66    0.66
   0 -18  -5    0.96    0.66
   0  18   5    0.89    0.74
   0  18   5    0.22    0.74
   0 -18  -6    0.59    0.96
   0 -18  -6   -0.74    0.74
   0  18   6   -0.89    1.03
   0  18   6   -0.30    1.62
   0 -18  -6   -0.37    0.59
   0 -18  -6    0.52    0.66
   0  18   6    0.22    0.66
   0  18   6    0.07    0.81
   0 -18  -7    4.21    1.03
   0 -18  -7    1.26    1.11
   0  18   7    5.54    1.33
   0  18   7    2.36    1.99
   0 -18  -7    4.50    0.89
   0 -18  -7    5.32    0.89
   0  18   7    4.14    0.96
   0  18   7    4.87    0.89
   0 -18  -8    0.44    0.81
   0 -18  -8   -0.52    1.03
   0  18   8   -0.89    1.77
   0  18   8    0.66    1.03
   0 -18  -8   -0.52    0.59
   0 -18  -8   -0.22    0.66
   0  18   8    0.89    0.81
   0 -18  -9    2.81    1.03
   0 -18  -9    1.77    1.18
   0  18   9    4.28    1.33
   0  18   9   -0.15    1.92
   0 -18  -9    2.66    0.74
   0 -18  -9    2.14    0.74
   0  18   9    1.48    0.66
   0  18   9    1.85    0.89
   0 -18 -10    0.15    0.89
   0 -18 -10   -0.74    1.18
   0  18  10   -0.30    1.18
   0  18  10    3.69    1.99
   0 -18 -10    0.00    0.59
   0 -18 -10    0.59    0.66
   0  18  10   -1.03    0.59
   0  18  10   -0.30    0.66
   0 -18 -11    2.07    1.33
   0 -18 -11    0.89    1.03
   0  18  11   -0.89    1.11
   0  18  11    0.44    1.77
   0 -18 -11    2.14    0.74
   0 -18 -11    1.18    0.74
   0  18  11    1.03    0.59
   0  18  11    0.22    0.66
   0 -18 -12    5.76    1.70
   0 -18 -12    4.36    1.33
   0  18  12    4.87    1.48
   0  18  12    0.52    1.85
   0 -18 -12    5.02    0.89
   0 -18 -12    5.10    0.89
   0  18  12    5.46    0.81
   0  18  12    4.28    0.96
   0 -18 -13    0.59    1.40
   0 -18 -13   -0.22    0.96
   0  18  13    0.00    1.26
   0  18  13    1.18    1.77
   0 -18 -13    1.92    0.66
   0 -18 -13    1.85    0.66
   0  18  13    0.74    0.59
   0  18  13    0.96    0.74
   0 -18 -14    0.07    1.03
   0  18  14    1.48    1.18
   0 -18 -14    4.43    0.89
   0 -18 -14    3.84    0.81
   0  18  14    3.84    0.74
   0  18  14    5.17    0.96
   0 -19   4   -0.07    0.89
   0 -19   4    0.00    0.59
   0 -19   4    0.22    0.59
   0  19  -4   -0.37    0.59
   0  19  -4   -0.30    0.66
   0 -19   3    0.37    1.03
   0 -19   3    1.18    0.89
   0  19  -3    0.44    0.96
   0  19  -3    2.58    1.26
   0 -19   3    1.26    0.66
   0 -19   3    1.62    0.66
   0  19  -3    1.55    0.66
   0  19  -3    2.14    0.74
   0 -19   2   -0.15    1.11
   0 -19   2    0.74    0.89
   0  19  -2    0.00    1.26
   0  19  -2    0.59    1.18
   0 -19   2   -0.52    0.52
   0 -19   2    1.11    0.66
   0  19  -2    0.81    0.66
   0  19  -2    1.11    0.66
   0 -19   1    0.37    1.18
   0 -19   1    0.74    0.96
   0  19  -1   -0.22    1.33
   0  19  -1    0.44    1.40
   0 -19   1    1.26    0.66
   0 -19   1   -0.15    0.59
   0  19  -1    0.44    0.66
   0  19  -1    0.22    0.66
   0  19   0    8.05    1.92
   0  19   0    4.87    1.48
   0 -19   0    6.79    0.89
   0  19   0    6.79    0.96
   0  19   0    7.90    1.03
   0  19   1    4.43    1.40
   0  19   1    0.15    1.62
   0 -19  -2    0.89    1.03
   0 -19  -2    1.92    0.96
   0  19   2   -0.59    1.55
   0  19   2    0.37    1.18
   0 -19  -2    1.11    0.66
   0 -19  -2    1.11    0.74
   0  19   2    2.66    0.81
   0  19   2    1.62    0.66
   0 -19  -3   -0.74    1.03
   0 -19  -3    0.37    0.81
   0  19   3    0.15    1.11
   0  19   3   -0.66    1.62
   0 -19  -3    0.44    0.59
   0 -19  -3    0.37    0.66
   0  19   3    0.22    0.74
   0  19   3   -0.96    0.59
   0 -19  -4   -1.11    0.96
   0 -19  -4   -0.37    0.81
   0  19   4   -0.96    1.70
   0  19   4    0.30    1.26
   0 -19  -4   -0.74    0.59
   0 -19  -4   -0.89    0.66
   0  19   4   -0.74    0.59
   0  19   4   -0.15    0.74
   0 -19  -5    1.48    1.03
   0 -19  -5    1.40    0.96
   0  19   5    1.62    1.26
   0  19   5    0.22    1.70
   0 -19  -5    1.26    0.66
   0 -19  -5   -0.81    0.66
   0  19   5    1.33    0.66
   0  19   5    0.15    0.74
   0 -19  -6    1.26    1.03
   0 -19  -6    0.59    0.96
   0  19   6    0.07    1.62
   0  19   6    0.22    1.11
   0 -19  -6    1.62    0.66
   0 -19  -6    0.22    0.59
   0  19   6    0.96    0.74
   0  19   6    0.74    0.59
   0 -19  -7    0.37    1.03
   0 -19  -7    1.18    1.03
   0  19   7    0.81    1.70
   0  19   7    0.22    1.03
   0 -19  -7   -0.30    0.59
   0 -19  -7   -0.44    0.59
   0  19   7    1.40    0.74
   0  19   7    0.66    0.66
   0 -19  -8    0.30    1.03
   0 -19  -8   -0.74    0.96
   0  19   8    0.22    1.70
   0  19   8   -0.07    1.03
   0 -19  -8   -0.52    0.59
   0 -19  -8   -0.37    0.59
   0  19   8    0.00    0.74
   0  19   8    0.00    0.59
   0 -19  -9    0.81    0.96
   0 -19  -9   -2.51    1.03
   0  19   9    1.40    1.77
   0  19   9   -0.07    0.96
   0 -19  -9    0.74    0.59
   0 -19  -9    0.15    0.59
   0  19   9    0.30    0.59
   0  19   9   -0.52    0.74
   0 -19 -10    1.26    0.96
   0 -19 -10    0.52    1.26
   0  19  10    1.85    1.11
   0  19  10    1.33    1.92
   0 -19 -10    1.03    0.66
   0 -19 -10    0.52    0.59
   0  19  10    0.44    0.66
   0 -19 -11    1.40    0.89
   0  19  11   -1.18    1.92
   0  19  11    1.33    1.03
   0 -19 -11    0.81    0.59
   0 -19 -11    1.85    0.66
   0  19  11    1.11    0.66
   0  19  11    0.74    0.74
   0 -19 -12    0.30    0.66
   0  19  12    1.85    0.81
   0  19  12    0.52    0.59
   0 -20   0   -0.81    0.59
   0 -20   0    1.18    0.66
   0  20   0    1.11    0.74
   0  20   0    0.59    0.74
   0 -20  -1    0.37    0.59
   0 -20  -1    0.44    0.59
   0  20   1   -0.59    0.74
   0  20   1   -0.96    0.59
   0 -20  -2    0.74    0.96
   0  20   2    0.74    1.03
   0 -20  -2    1.48    0.74
   0 -20  -2    1.11    0.66
   0  20   2    0.07    0.59
   0  20   2    1.33    0.81
   0 -20  -3   -0.37    0.89
   0  20   3   -0.07    0.89
   0 -20  -3    0.30    0.59
   0 -20  -3    0.22    0.66
   0  20   3   -0.59    0.89
   0  20   3    0.30    0.59
   0 -20  -4    0.07    0.89
   0  20   4   -0.37    0.96
   0 -20  -4   -0.96    0.59
   0 -20  -4    0.30    0.59
   0  20   4    0.66    0.81
   0  20   4    0.15    0.59
   0 -20  -5    0.66    0.96
   0  20   5   -0.07    0.96
   0 -20  -5    1.48    0.66
   0 -20  -5    2.51    0.74
   0  20   5    1.11    0.66
   0  20   5    1.48    0.81
   0 -20  -6    1.18    1.03
   0  20   6   -0.07    0.96
   0 -20  -6    1.18    0.66
   0 -20  -6    0.59    0.66
   0  20   6    1.40    0.81
   0  20   6    0.96    0.66
   0 -20  -7    0.66    0.66
   0 -20  -7    1.62    0.66
   0  20   7    1.85    0.81
   0  20   7    1.85    0.74
   0 -20  -8    2.58    0.74
   0 -20  -8    1.70    0.66
   0  20   8    0.89    0.81
   0  20   8    1.62    0.74
   0 -20  -9    1.70    0.74
   0 -20  -9    1.70    0.66
   0  20   9    0.37    0.74
   0  20   9    0.89    0.74
  -1  20   7   -0.66    0.74
  -1  20   7    0.59    0.66
   1 -20  -7   -0.07    0.66
   1 -20  -7   -0.44    0.59
  -1  20   6    1.77    0.81
  -1  20   6    2.58    0.74
   1 -20  -6    2.22    0.66
   1 -20  -6    1.48    0.66
  -1  20   5    1.18    0.74
  -1  20   5    0.44    0.81
   1 -20  -5    0.52    0.59
   1 -20  -5    1.18    0.66
  -1  20   4    0.00    0.66
  -1  20   4    1.40    0.81
   1 -20  -4    0.15    0.66
   1 -20  -4    0.66    0.66
  -1  20   3    1.99    0.89
  -1  20   3    0.96    0.66
   1 -20  -3    0.74    0.59
   1 -20  -3    0.00    0.59
  -1  20   2    0.59    0.74
  -1  20   2    0.30    0.59
   1 -20  -2    0.74    0.66
   1 -20  -2    0.66    0.59
  -1  19  11    2.14    0.66
  -1  19  11    0.89    0.74
   1 -19 -11    0.37    0.66
   1 -19 -11    1.33    0.66
  -1  19  10    1.77    1.18
   1 -19 -10    0.96    0.96
  -1  19  10    2.95    0.74
  -1  19  10    1.99    0.89
   1 -19 -10    3.69    0.74
   1 -19 -10    3.32    0.81
   1 -19  -9    2.51    1.11
   1 -19  -9    2.58    1.40
  -1  19   9    5.17    0.89
  -1  19   9    6.72    1.03
   1 -19  -9    4.65    0.81
   1 -19  -9    5.54    0.89
  -1  19   8    0.07    1.77
  -1  19   8    3.62    1.18
   1 -19  -8    1.85    1.03
   1 -19  -8    0.59    1.11
  -1  19   8    3.69    0.81
  -1  19   8    1.26    0.81
   1 -19  -8    2.51    0.74
   1 -19  -8    2.88    0.74
  -1  19   7    0.52    1.03
  -1  19   7    0.15    1.70
   1 -19  -7   -1.26    0.89
   1 -19  -7    0.89    1.03
  -1  19   7   -0.15    0.74
  -1  19   7   -0.66    0.66
   1 -19  -7   -0.44    0.59
   1 -19  -7    0.00    0.59
  -1  19   6    1.33    1.11
  -1  19   6    0.30    1.62
   1 -19  -6    1.18    1.03
   1 -19  -6    0.89    1.11
  -1  19   6    1.70    0.66
  -1  19   6    0.00    0.74
   1 -19  -6    1.55    0.66
   1 -19  -6    1.48    0.66
  -1  19   5   -0.81    1.70
  -1  19   5    0.52    1.11
   1 -19  -5    0.59    1.03
   1 -19  -5   -0.30    0.89
  -1  19   5    0.22    0.66
  -1  19   5   -0.96    0.74
   1 -19  -5   -0.66    0.59
   1 -19  -5   -0.37    0.59
  -1  19   4   -0.52    1.11
  -1  19   4   -0.37    1.62
   1 -19  -4   -0.15    0.89
   1 -19  -4   -1.40    0.96
  -1  19   4   -0.15    0.59
  -1  19   4   -0.52    0.74
   1 -19  -4    0.15    0.66
   1 -19  -4   -0.52    0.59
  -1  19   3   -1.26    1.62
  -1  19   3    0.07    1.11
   1 -19  -3    0.22    0.96
   1 -19  -3    1.18    0.96
  -1  19   3   -0.07    0.74
  -1  19   3    0.37    0.66
   1 -19  -3    1.18    0.66
   1 -19  -3    0.00    0.66
  -1  19   2    1.18    1.70
  -1  19   2    2.36    1.26
   1 -19  -2    1.18    1.03
   1 -19  -2   -1.55    1.03
  -1  19   2    2.36    0.66
  -1  19   2    1.26    0.81
   1 -19  -2    0.89    0.66
   1 -19  -2    1.77    0.66
  -1  19   1   -1.70    1.70
  -1  19   1    0.81    1.11
   1 -19  -1    0.15    1.03
   1 -19  -1   -0.15    1.03
  -1  19   1    3.62    0.74
  -1  19   1    2.36    0.89
   1 -19  -1    1.55    0.66
   1 -19  -1    3.40    0.81
  -1  19   0    0.59    1.11
  -1  19   0   -0.07    1.40
   1 -19   0    0.96    1.18
   1 -19   0    0.07    0.89
  -1  19   0    1.33    0.81
  -1  19   0    0.96    0.66
   1 -19   0    1.03    0.59
   1 -19   0    2.58    0.74
  -1  19  -1    0.37    1.18
  -1  19  -1    0.30    0.96
   1 -19   1    0.44    1.11
   1 -19   1    0.52    0.81
   1 -19   1    0.96    0.66
  -1  19  -2   -0.44    0.96
   1 -19   2   -0.22    0.81
   1 -19   2   -0.44    0.59
  -1  19  -3    0.30    0.74
  -1  19  -3    0.81    0.74
   1 -19   3    0.81    0.59
   1 -19   3    0.30    0.66
  -1  18  13    0.89    1.70
  -1  18  13    1.70    1.18
   1 -18 -13    0.81    0.96
  -1  18  13    2.58    0.66
  -1  18  13    2.58    0.81
   1 -18 -13    0.74    0.66
   1 -18 -13    1.26    0.66
  -1  18  12    1.77    1.70
  -1  18  12    1.62    1.26
   1 -18 -12    0.74    1.40
   1 -18 -12    1.40    1.11
  -1  18  12    0.15    0.59
  -1  18  12    0.30    0.74
   1 -18 -12    1.18    0.59
   1 -18 -12    1.18    0.66
  -1  18  11    4.80    1.40
  -1  18  11    1.03    1.85
   1 -18 -11    3.69    1.26
   1 -18 -11    3.32    1.48
  -1  18  11    4.95    0.96
  -1  18  11    4.73    0.81
   1 -18 -11    7.09    0.96
   1 -18 -11    5.10    0.81
  -1  18  10   -2.14    1.77
  -1  18  10   -0.59    1.11
   1 -18 -10   -1.26    0.96
   1 -18 -10    0.15    1.18
  -1  18  10    0.96    0.59
  -1  18  10   -0.37    0.66
   1 -18 -10   -0.74    0.59
  -1  18   9   -1.40    1.92
  -1  18   9    1.55    1.18
   1 -18  -9    1.70    1.18
   1 -18  -9    1.55    0.96
  -1  18   9    2.81    0.74
  -1  18   9    0.66    0.74
   1 -18  -9    1.11    0.66
   1 -18  -9    2.07    0.66
  -1  18   8    1.55    1.92
  -1  18   8    3.25    1.26
   1 -18  -8    2.81    1.03
   1 -18  -8    1.48    1.11
  -1  18   8    1.11    0.74
   1 -18  -8    3.10    0.74
   1 -18  -8    2.58    0.74
  -1  18   7    1.85    1.85
  -1  18   7    2.58    1.18
   1 -18  -7    0.59    1.03
   1 -18  -7    2.07    0.96
  -1  18   7    2.88    0.81
  -1  18   7    3.40    0.89
   1 -18  -7    2.88    0.74
   1 -18  -7    1.99    0.66
  -1  18   6   -0.59    1.18
  -1  18   6    1.92    1.70
   1 -18  -6    0.22    1.03
   1 -18  -6    1.85    0.96
  -1  18   6    2.22    0.74
  -1  18   6    0.74    0.74
   1 -18  -6    1.03    0.66
   1 -18  -6    1.18    0.66
  -1  18   5    1.70    1.85
  -1  18   5    5.54    1.48
   1 -18  -5    3.69    1.03
   1 -18  -5    3.32    1.18
  -1  18   5    5.17    0.89
  -1  18   5    4.58    0.96
  -1  18   4    2.58    1.77
  -1  18   4    1.92    1.33
   1 -18  -4    2.44    0.96
   1 -18  -4    1.40    1.11
  -1  18   4    3.69    0.81
  -1  18   4    2.58    0.89
   1 -18  -4    1.99    0.74
   1 -18  -4    3.10    0.74
  -1  18   3    5.10    0.89
  -1  18   3    4.28    0.96
   1 -18  -3    4.36    0.89
   1 -18  -3    5.69    0.81
  -1  18   2   -0.96    1.33
  -1  18   2    0.52    1.62
   1 -18  -2    0.44    0.81
   1 -18  -2    0.00    1.11
   1 -18  -2    0.00    0.66
  -1  18   1   -1.99    1.77
  -1  18   1    0.07    1.33
   1 -18  -1    0.37    0.81
   1 -18  -1    0.30    1.26
   1 -18  -1    0.30    0.66
  -1  18   0    0.07    1.55
  -1  18   0   -0.59    1.26
   1 -18   0    1.03    1.33
   1 -18   0    1.48    0.89
  -1  18   0   -0.15    0.66
  -1  18   0   -0.07    0.74
   1 -18   0   -0.22    0.59
   1 -18   0    0.96    0.66
  -1  18  -1    1.48    1.62
  -1  18  -1    2.73    1.40
   1 -18   1    0.74    1.48
   1 -18   1    2.07    0.96
  -1  18  -1    1.62    0.74
  -1  18  -1    1.55    0.66
   1 -18   1    0.07    0.59
   1 -18   1    1.03    0.59
  -1  18  -2    1.26    1.55
  -1  18  -2    0.52    1.33
   1 -18   2    0.52    0.96
   1 -18   2    1.62    1.40
  -1  18  -2    0.59    0.66
  -1  18  -2    1.03    0.74
   1 -18   2    1.55    0.59
   1 -18   2    0.44    0.59
  -1  18  -3    1.85    1.40
  -1  18  -3    1.62    1.40
  -1  18  -3    0.81    0.74
  -1  18  -3    2.66    0.74
   1 -18   3    1.92    0.66
   1 -18   3    2.88    0.74
  -1  18  -4    0.22    1.33
  -1  18  -4   -0.44    1.26
   1 -18   4    2.22    1.11
   1 -18   4   -1.18    1.18
  -1  18  -4    1.99    0.81
  -1  18  -4   -0.15    0.66
   1 -18   4    0.22    0.66
   1 -18   4    1.11    0.59
  -1  18  -5    0.00    1.26
  -1  18  -5    0.52    1.18
   1 -18   5    0.07    1.18
   1 -18   5    0.96    1.03
  -1  18  -5    2.81    0.74
  -1  18  -5    3.40    0.89
   1 -18   5    3.69    0.74
   1 -18   5    2.88    0.66
  -1  18  -6    1.99    0.74
  -1  18  -6   -0.30    0.66
   1 -18   6    0.59    0.66
   1 -18   6    0.74    0.66
  -1  17  15    1.92    1.70
  -1  17  15   -1.18    1.18
   1 -17 -15   -0.66    1.48
   1 -17 -15    1.85    0.96
  -1  17  15    1.18    0.81
  -1  17  15    1.03    0.59
   1 -17 -15   -0.59    0.59
  -1  17  14    0.44    1.40
  -1  17  14   -0.30    1.62
   1 -17 -14    2.81    1.48
   1 -17 -14    0.89    1.11
  -1  17  14    1.33    0.59
  -1  17  14    1.70    0.74
   1 -17 -14    0.96    0.66
   1 -17 -14    0.81    0.59
   1 -17 -13    3.99    1.70
   1 -17 -13    5.69    1.48
  -1  17  13    6.28    0.89
  -1  17  13    6.65    1.03
   1 -17 -13    5.98    0.89
   1 -17 -13    6.42    0.96
  -1  17  12    2.73    1.26
  -1  17  12    0.30    1.92
   1 -17 -12    1.70    1.11
   1 -17 -12    0.89    1.33
   1 -17 -12    0.44    0.66
   1 -17 -12    0.89    0.66
   1 -17 -11    6.20    1.62
   1 -17 -11    8.05    1.40
  -1  17  11    8.27    0.96
  -1  17  11    7.68    1.11
   1 -17 -11    7.98    1.03
   1 -17 -11    7.38    0.96
  -1  17  10    0.22    1.11
  -1  17  10    4.50    2.07
   1 -17 -10    1.62    0.89
   1 -17 -10    1.11    1.18
  -1  17  10    0.07    0.66
  -1  17  10    1.62    0.81
   1 -17 -10    0.59    0.66
   1 -17 -10    0.52    0.66
  -1  17   9    2.51    1.99
  -1  17   9    6.28    1.40
   1 -17  -9    5.83    1.03
   1 -17  -9    4.36    1.26
  -1  17   9    7.53    0.96
  -1  17   9    6.50    1.03
   1 -17  -9    6.87    0.96
  -1  17   8   -1.33    1.92
  -1  17   8    0.52    0.96
   1 -17  -8    1.40    1.03
   1 -17  -8    0.37    0.74
  -1  17   8    0.66    0.66
  -1  17   8    0.81    0.81
   1 -17  -8    0.81    0.74
   1 -17  -8    0.15    0.59
  -1  17   7    1.85    1.11
  -1  17   7    0.37    1.92
   1 -17  -7    0.89    0.74
   1 -17  -7    0.59    0.96
  -1  17   7    0.30    0.74
  -1  17   7   -1.18    0.81
   1 -17  -7   -0.59    0.66
   1 -17  -7   -0.37    0.59
  -1  17   6    3.84    1.85
  -1  17   6    8.34    1.33
   1 -17  -6    7.90    1.33
   1 -17  -6    6.28    1.03
  -1  17   6    8.79    1.18
   1 -17  -6    6.20    0.89
   1 -17  -6    8.79    0.96
  -1  17   5   -1.33    1.40
  -1  17   5    0.00    0.96
   1 -17  -5   -0.15    0.89
   1 -17  -5    0.00    0.66
  -1  17   5    0.00    0.81
  -1  17   5   -0.44    0.81
   1 -17  -5    0.30    0.66
  -1  17   4    0.22    0.96
  -1  17   4   -1.70    1.48
   1 -17  -4    0.00    0.66
   1 -17  -4    1.18    0.96
  -1  17   3    1.70    1.55
  -1  17   3    5.83    1.26
   1 -17  -3    2.58    1.11
   1 -17  -3    3.91    0.89
  -1  17   3    5.69    0.96
  -1  17   3    4.50    0.96
   1 -17  -3    6.28    0.89
   1 -17  -3    4.21    0.89
  -1  17   2   -0.30    1.40
  -1  17   2   -1.11    0.96
   1 -17  -2   -0.66    0.89
   1 -17  -2    1.03    0.74
  -1  17   2    0.52    0.74
  -1  17   2   -0.37    0.74
   1 -17  -2   -0.22    0.66
   1 -17  -2    0.37    0.66
  -1  17   1    5.98    1.55
  -1  17   1    3.40    1.18
   1 -17  -1    4.80    0.96
   1 -17  -1    2.44    1.26
  -1  17   1    3.99    0.89
  -1  17   1    5.02    0.96
   1 -17  -1    3.25    0.74
   1 -17  -1    4.43    0.81
  -1  17   0    3.40    1.40
  -1  17   0    2.44    1.18
   1 -17   0    2.88    0.89
   1 -17   0    1.85    1.40
  -1  17   0    2.29    0.74
  -1  17   0    1.40    0.81
   1 -17   0    1.77    0.74
   1 -17   0    1.85    0.74
  -1  17  -1    1.70    1.26
  -1  17  -1   -0.66    1.18
   1 -17   1    0.74    0.81
   1 -17   1    0.00    1.33
  -1  17  -1    0.30    0.66
  -1  17  -1    0.07    0.74
   1 -17   1    0.81    0.59
   1 -17   1    1.70    0.66
  -1  17  -2   -0.66    1.18
  -1  17  -2   -1.33    1.18
   1 -17   2    0.37    0.74
   1 -17   2    1.77    1.48
  -1  17  -2    0.52    0.66
  -1  17  -2   -0.44    0.66
   1 -17   2    1.03    0.59
   1 -17   2   -0.15    0.59
  -1  17  -3    1.62    1.33
  -1  17  -3    1.33    1.33
   1 -17   3    0.96    1.48
   1 -17   3    1.77    0.89
  -1  17  -3    2.14    0.74
  -1  17  -3    0.81    0.74
   1 -17   3    1.62    0.66
   1 -17   3    1.55    0.66
  -1  17  -4    0.07    1.33
  -1  17  -4    1.48    1.26
   1 -17   4    1.33    1.33
   1 -17   4    0.07    0.89
  -1  17  -4    0.74    0.66
  -1  17  -4    0.66    0.66
   1 -17   4    0.89    0.66
   1 -17   4    1.03    0.59
  -1  17  -5   -1.26    1.03
  -1  17  -5   -1.85    1.18
   1 -17   5    0.22    0.96
   1 -17   5   -0.81    1.18
  -1  17  -5    1.18    0.66
  -1  17  -5    0.89    0.66
   1 -17   5    0.96    0.59
   1 -17   5   -0.22    0.52
  -1  17  -6   -0.15    1.33
  -1  17  -6   -1.92    1.18
   1 -17   6    0.74    1.11
   1 -17   6   -0.30    1.18
  -1  17  -6   -0.52    0.59
  -1  17  -6    0.52    0.66
   1 -17   6   -0.15    0.52
   1 -17   6    0.07    0.52
  -1  17  -7    0.22    1.33
  -1  17  -7    0.81    1.33
   1 -17   7    3.32    1.26
   1 -17   7   -0.74    1.18
  -1  17  -7    1.26    0.66
  -1  17  -7   -0.15    0.74
   1 -17   7   -0.07    0.59
   1 -17   7    0.81    0.59
  -1  17  -8   -1.70    1.18
  -1  17  -8   -0.74    1.18
   1 -17   8    2.07    1.03
  -1  17  -8    0.59    0.66
  -1  17  -8    1.85    0.66
   1 -17   8    1.11    0.59
   1 -17   8    1.18    0.59
  -1  16  17    1.26    1.18
   1 -16 -17    0.52    0.96
  -1  16  16    2.58    1.77
  -1  16  16    1.11    1.40
   1 -16 -16    4.95    1.77
   1 -16 -16    1.40    1.40
  -1  16  16    6.72    1.03
  -1  16  16    5.10    0.81
   1 -16 -16    4.43    0.81
   1 -16 -16    4.36    0.81
  -1  16  15    0.37    1.40
  -1  16  15   -0.07    1.62
   1 -16 -15    0.59    1.18
   1 -16 -15    0.37    1.48
  -1  16  15    1.77    0.66
  -1  16  15    0.81    0.74
   1 -16 -15    0.59    0.66
   1 -16 -15    0.74    0.59
  -1  16  14    0.66    1.70
  -1  16  14    5.76    1.70
   1 -16 -14    2.81    1.48
   1 -16 -14    1.70    1.48
  -1  16  14    3.18    0.89
  -1  16  14    3.84    0.81
   1 -16 -14    3.77    0.81
   1 -16 -14    4.95    0.89
  -1  16  13    1.48    1.26
  -1  16  13    2.44    1.85
   1 -16 -13   -1.40    1.26
   1 -16 -13    1.77    1.03
  -1  16  13    0.22    0.74
  -1  16  13    1.03    0.66
   1 -16 -13    0.59    0.66
   1 -16 -13    0.81    0.66
  -1  16  12    1.26    1.26
  -1  16  12    1.55    1.85
   1 -16 -12    1.92    0.96
   1 -16 -12    1.33    1.33
  -1  16  12    1.40    0.81
  -1  16  12    1.33    0.74
   1 -16 -12    1.99    0.74
   1 -16 -12    1.99    0.66
  -1  16  11    0.30    1.26
  -1  16  11   -2.51    1.55
   1 -16 -11   -0.15    0.96
   1 -16 -11    0.81    1.18
  -1  16  11    0.44    0.74
  -1  16  11   -0.15    0.66
   1 -16 -11   -0.30    0.66
   1 -16 -11   -0.59    0.59
  -1  16  10   -0.37    1.03
  -1  16  10    0.89    1.70
   1 -16 -10    0.96    1.03
   1 -16 -10    0.59    0.81
  -1  16  10   -0.44    0.74
  -1  16  10    0.22    0.59
   1 -16 -10    0.66    0.59
   1 -16 -10    0.66    0.66
  -1  16   9    0.81    1.77
  -1  16   9    0.74    0.96
   1 -16  -9    0.00    0.74
   1 -16  -9   -0.66    0.96
  -1  16   9    0.81    0.81
  -1  16   9    1.40    0.66
   1 -16  -9    0.89    0.66
   1 -16  -9    0.07    0.74
  -1  16   8    1.26    1.70
  -1  16   8    1.11    0.96
   1 -16  -8    2.44    1.03
   1 -16  -8    3.40    0.89
  -1  16   8    1.85    0.89
  -1  16   8    2.58    0.89
   1 -16  -8    3.25    0.89
   1 -16  -8    1.48    0.74
  -1  16   7   -0.89    1.85
  -1  16   7    3.54    1.03
   1 -16  -7    3.10    0.81
   1 -16  -7    2.29    1.11
  -1  16   7    2.22    0.96
  -1  16   6   12.18    1.99
  -1  16   6    9.90    1.40
   1 -16  -6   11.22    1.40
   1 -16  -6   10.86    1.11
  -1  16   6    9.01    1.33
   1 -16  -6    9.38    1.11
  -1  16   5   -0.37    1.40
  -1  16   5    2.36    1.03
   1 -16  -5    3.40    1.03
   1 -16  -5    1.77    0.74
  -1  16   5    1.92    0.81
   1 -16  -5    2.07    0.74
   1 -16  -5    3.10    0.81
  -1  16   4    4.28    1.18
  -1  16   4    4.65    1.48
   1 -16  -4    1.11    0.96
   1 -16  -4    3.77    0.81
  -1  16   4    3.47    0.89
  -1  16   4    4.58    0.96
   1 -16  -4    5.24    0.89
   1 -16  -4    4.21    0.81
   1 -16  -3    1.92    0.74
   1 -16  -3    0.15    0.89
  -1  16   3    2.36    0.81
  -1  16   3    1.33    0.81
   1 -16  -3    1.48    0.74
   1 -16  -3    1.99    0.74
  -1  16   2   16.76    1.40
  -1  16   2   16.25    1.33
   1 -16  -2   17.50    1.33
   1 -16  -2   17.28    1.26
  -1  16   1    2.51    1.18
  -1  16   1    0.74    1.03
   1 -16  -1    1.62    1.03
   1 -16  -1    3.10    0.81
  -1  16   1    3.10    0.89
  -1  16   1    3.25    0.81
   1 -16  -1    2.44    0.74
   1 -16  -1    1.62    0.74
  -1  16   0    7.09    1.40
  -1  16   0    9.38    1.48
   1 -16   0    7.24    1.40
   1 -16   0    9.23    1.11
  -1  16   0    7.98    1.03
  -1  16   0    7.90    1.03
   1 -16   0    9.53    0.96
   1 -16   0    8.64    0.96
  -1  16  -1    0.30    1.03
  -1  16  -1    0.74    1.03
   1 -16   1    0.30    0.66
   1 -16   1   -0.22    1.03
  -1  16  -1   -0.37    0.74
  -1  16  -1   -0.22    0.66
   1 -16   1    0.00    0.66
   1 -16   1    0.89    0.66
  -1  16  -2    0.96    1.03
  -1  16  -2   -0.30    1.11
   1 -16   2    0.74    1.26
   1 -16   2    0.52    0.66
  -1  16  -2    0.30    0.74
  -1  16  -2    0.96    0.66
   1 -16   2    0.00    0.59
   1 -16   2    1.11    0.66
  -1  16  -3    1.33    1.03
  -1  16  -3    1.85    1.18
   1 -16   3    2.51    1.26
   1 -16   3    0.22    0.74
  -1  16  -3    0.52    0.74
  -1  16  -3    0.44    0.66
   1 -16   3    1.11    0.66
   1 -16   3    0.30    0.66
  -1  16  -4   -0.37    1.03
  -1  16  -4    0.07    1.18
   1 -16   4   -0.59    1.11
   1 -16   4    0.07    0.74
  -1  16  -4    0.66    0.74
  -1  16  -4    0.37    0.66
   1 -16   4   -0.59    0.59
   1 -16   4   -0.96    0.59
  -1  16  -5    1.70    1.33
  -1  16  -5    0.52    1.11
   1 -16   5   -0.37    1.26
   1 -16   5   -0.59    0.81
  -1  16  -5   -0.44    0.66
  -1  16  -5   -0.07    0.66
   1 -16   5    0.07    0.59
   1 -16   5   -0.15    0.59
  -1  16  -6    0.74    1.26
  -1  16  -6    0.96    1.18
   1 -16   6    0.96    1.11
   1 -16   6    2.88    1.26
  -1  16  -6    2.51    0.74
  -1  16  -6    3.32    0.81
   1 -16   6    2.81    0.66
   1 -16   6    2.22    0.66
  -1  16  -7   -0.15    1.03
  -1  16  -7   -1.03    1.18
   1 -16   7    0.96    1.03
   1 -16   7   -0.44    1.11
  -1  16  -7    0.30    0.59
  -1  16  -7    1.11    0.66
   1 -16   7   -0.74    0.52
   1 -16   7    0.00    0.52
  -1  16  -8    1.55    1.48
  -1  16  -8    0.07    1.33
   1 -16   8    3.18    1.33
   1 -16   8    4.50    1.62
  -1  16  -8    4.73    0.81
  -1  16  -8    4.14    0.81
   1 -16   8    4.50    0.66
   1 -16   8    5.02    0.74
  -1  16  -9    0.22    1.40
  -1  16  -9   -1.48    1.26
   1 -16   9    0.22    1.03
   1 -16   9    0.30    1.18
  -1  16  -9    1.77    0.74
  -1  16  -9    0.81    0.66
   1 -16   9    0.52    0.52
   1 -16   9    1.55    0.59
  -1  16 -10   -0.89    1.18
  -1  16 -10    1.26    1.33
   1 -16  10   -1.18    0.96
   1 -16  10    1.11    0.81
  -1  16 -10    1.40    0.59
  -1  16 -10    0.81    0.59
  -1  15  18   -0.74    1.40
  -1  15  18    0.37    1.11
   1 -15 -18   -0.52    1.26
   1 -15 -18   -0.37    1.03
  -1  15  18    1.03    0.66
   1 -15 -18    0.96    0.66
  -1  15  17   -0.59    1.18
  -1  15  17   -1.11    1.70
   1 -15 -17    0.66    1.11
   1 -15 -17   -1.11    1.48
  -1  15  17    1.99    0.81
  -1  15  17    1.99    0.66
   1 -15 -17    0.81    0.66
   1 -15 -17    0.07    0.66
  -1  15  16    4.80    1.85
  -1  15  16    3.18    1.55
   1 -15 -16    7.75    1.85
   1 -15 -16    3.47    1.48
  -1  15  16    9.01    1.11
  -1  15  16    6.94    0.89
   1 -15 -16    6.50    0.96
   1 -15 -16    7.75    0.96
  -1  15  15    5.91    1.70
  -1  15  15    3.77    1.92
   1 -15 -15    5.61    1.55
   1 -15 -15    7.02    1.77
  -1  15  15    9.23    1.18
  -1  15  15    8.57    0.96
   1 -15 -15    9.97    1.11
   1 -15 -15    9.67    0.96
  -1  15  14    4.36    1.55
  -1  15  14    2.58    1.77
   1 -15 -14    2.66    1.40
   1 -15 -14    2.66    1.11
  -1  15  14    5.46    0.96
  -1  15  14    4.58    0.81
  -1  15  13    1.40    1.62
  -1  15  13    1.40    1.40
   1 -15 -13    1.18    0.96
   1 -15 -13   -0.37    1.26
  -1  15  13    1.99    0.81
  -1  15  13    1.62    0.66
   1 -15 -13    2.22    0.66
   1 -15 -13    2.29    0.81
  -1  15  12    1.33    1.11
  -1  15  12    2.07    1.62
   1 -15 -12    0.00    1.11
   1 -15 -12    0.74    0.81
  -1  15  12    0.37    0.59
  -1  15  12   -0.07    0.74
   1 -15 -12    0.52    0.66
   1 -15 -12   -0.44    0.59
  -1  15  11    1.55    1.55
  -1  15  11   -0.52    1.03
   1 -15 -11    0.07    0.74
   1 -15 -11   -0.52    1.11
  -1  15  11    0.15    0.74
  -1  15  11   -0.07    0.66
   1 -15 -11    0.15    0.59
   1 -15 -11   -0.07    0.66
  -1  15  10    3.91    1.77
  -1  15  10    5.32    1.26
   1 -15 -10    6.50    1.03
   1 -15 -10    6.28    1.33
  -1  15  10    5.98    1.03
  -1  15  10    6.94    0.96
   1 -15 -10    6.13    0.89
   1 -15 -10    5.76    0.96
  -1  15   9    3.03    1.11
  -1  15   9    2.81    1.70
   1 -15  -9    2.51    1.11
   1 -15  -9    3.47    0.89
  -1  15   9    1.48    0.89
   1 -15  -9    2.95    0.74
  -1  15   8   -0.89    1.55
  -1  15   8    0.00    0.89
   1 -15  -8    0.00    0.74
   1 -15  -8    0.22    0.96
  -1  15   8    0.44    0.74
   1 -15  -8   -0.44    0.74
  -1  15   7   -1.85    1.70
   1 -15  -7   -0.74    0.89
  -1  15   7    1.26    0.74
  -1  15   7    0.59    0.74
   1 -15  -7    0.00    0.66
   1 -15  -7    0.59    0.66
  -1  15   6   13.74    1.26
  -1  15   6   12.55    1.18
   1 -15  -6   11.96    1.11
  -1  15   5    0.66    0.81
  -1  15   5   -0.96    0.81
   1 -15  -5    1.77    0.74
   1 -15  -5    0.59    0.66
   1 -15  -4   11.67    1.26
  -1  15   4   18.46    1.40
  -1  15   4   19.72    1.48
   1 -15  -4   18.61    1.33
   1 -15  -4   17.72    1.26
  -1  15   3    2.51    1.18
   1 -15  -3    2.81    0.81
  -1  15   3    1.85    0.89
  -1  15   3    3.54    0.89
   1 -15  -3    3.03    0.74
   1 -15  -3    3.32    0.81
   1 -15  -2   37.96    2.07
  -1  15   2   47.04    1.99
  -1  15   2   48.59    2.14
   1 -15  -2   48.44    2.07
   1 -15  -2   48.07    1.99
  -1  15   1    1.18    0.81
  -1  15   1   -0.07    0.74
   1 -15  -1    1.85    0.74
   1 -15  -1    1.33    0.74
  -1  15   0    0.66    0.74
  -1  15   0    1.18    0.74
   1 -15   0    0.37    0.59
   1 -15   0    0.07    0.66
  -1  15  -1    0.15    0.96
   1 -15   1   -0.66    0.89
  -1  15  -1   -0.22    0.66
  -1  15  -1   -0.07    0.81
   1 -15   1    0.66    0.66
   1 -15   1    0.66    0.66
  -1  15  -2   -0.37    0.96
  -1  15  -2    1.40    0.96
   1 -15   2   -0.22    0.66
   1 -15   2   -0.22    0.89
  -1  15  -2   -1.33    0.66
  -1  15  -2    0.37    0.74
   1 -15   2   -0.15    0.59
   1 -15   2   -0.44    0.66
  -1  15  -3    0.44    1.03
  -1  15  -3    1.99    1.03
   1 -15   3    2.14    0.74
   1 -15   3    1.18    0.96
  -1  15  -3    2.44    0.74
  -1  15  -3    1.48    0.81
   1 -15   3    3.62    0.74
   1 -15   3    2.22    0.74
  -1  15  -4    1.92    1.03
  -1  15  -4    2.88    1.26
   1 -15   4    1.85    1.03
   1 -15   4    2.29    0.81
  -1  15  -4    1.55    0.81
  -1  15  -4    0.81    0.81
   1 -15   4    1.11    0.66
   1 -15   4    1.92    0.66
  -1  15  -5    1.03    1.03
  -1  15  -5    0.74    1.11
   1 -15   5    0.30    0.96
   1 -15   5    1.18    0.74
  -1  15  -5   -0.15    0.66
  -1  15  -5    0.74    0.74
   1 -15   5    0.37    0.59
   1 -15   5    1.03    0.66
  -1  15  -6    0.22    1.11
  -1  15  -6   -0.37    1.03
   1 -15   6    0.22    0.81
   1 -15   6    0.81    1.03
  -1  15  -6    0.74    0.74
  -1  15  -6    0.44    0.66
   1 -15   6    0.15    0.59
  -1  15  -7    1.11    1.11
  -1  15  -7    1.26    1.11
   1 -15   7   -0.66    1.18
   1 -15   7    0.66    0.89
  -1  15  -7    1.55    0.66
  -1  15  -7    0.59    0.66
   1 -15   7    2.36    0.66
   1 -15   7    1.77    0.66
  -1  15  -8    1.33    1.18
  -1  15  -8    2.44    1.26
   1 -15   8    3.10    1.11
   1 -15   8    3.69    1.40
  -1  15  -8    3.99    0.74
  -1  15  -8    2.58    0.74
  -1  15  -9    0.00    1.03
  -1  15  -9   -0.15    1.11
   1 -15   9   -0.96    1.26
   1 -15   9    1.03    1.11
  -1  15  -9   -0.15    0.59
  -1  15  -9   -0.07    0.59
   1 -15   9    0.00    0.52
   1 -15   9    0.22    0.59
  -1  15 -10    0.30    1.18
  -1  15 -10   -2.51    1.18
   1 -15  10    0.44    1.11
   1 -15  10    0.89    1.18
  -1  15 -10    0.66    0.66
  -1  15 -10    0.96    0.59
   1 -15  10    0.07    0.44
   1 -15  10   -0.07    0.52
  -1  15 -11   -0.74    1.33
  -1  15 -11    0.44    1.11
   1 -15  11    1.48    0.96
   1 -15  11    0.00    1.03
  -1  15 -11    0.81    0.52
  -1  15 -11    0.00    0.59
   1 -15  11    0.37    0.52
  -1  15 -12    0.81    1.18
   1 -15  12    0.74    0.89
  -1  14  19    1.03    1.40
  -1  14  19    0.00    0.96
   1 -14 -19    0.37    1.11
   1 -14 -19    0.37    1.33
  -1  14  19   -0.30    0.59
  -1  14  19   -0.44    0.74
   1 -14 -19   -0.52    0.59
   1 -14 -19   -0.07    0.59
   1 -14 -18    3.32    1.62
   1 -14 -18    7.38    1.62
  -1  14  18    8.49    1.11
  -1  14  18    7.38    0.96
   1 -14 -18    5.98    0.96
   1 -14 -18    7.24    0.96
  -1  14  17   -0.44    1.40
  -1  14  17   -0.66    0.96
   1 -14 -17    0.74    1.26
   1 -14 -17   -0.30    1.03
  -1  14  17    0.96    0.74
  -1  14  17   -0.15    0.59
   1 -14 -17   -0.52    0.59
   1 -14 -17    0.74    0.74
  -1  14  16    2.07    1.33
  -1  14  16    4.06    1.70
   1 -14 -16    2.22    1.18
   1 -14 -16    4.14    1.48
  -1  14  16    2.36    0.89
  -1  14  16    3.69    0.81
   1 -14 -16    3.10    0.74
   1 -14 -16    4.50    0.89
  -1  14  15    0.74    1.18
  -1  14  15   -0.15    1.70
   1 -14 -15    2.36    1.40
   1 -14 -15    2.73    1.11
  -1  14  15    1.85    0.66
  -1  14  15    3.18    0.89
   1 -14 -15    4.36    0.81
   1 -14 -15    2.44    0.74
  -1  14  14    0.81    1.18
  -1  14  14    1.33    1.55
   1 -14 -14    0.59    1.33
   1 -14 -14   -0.15    0.96
  -1  14  14    2.36    0.74
  -1  14  14    2.66    0.89
   1 -14 -14    1.77    0.74
   1 -14 -14    1.26    0.66
  -1  14  13    0.59    1.11
  -1  14  13   -0.07    1.62
   1 -14 -13    0.22    1.18
   1 -14 -13    0.52    0.96
  -1  14  13    0.59    0.66
  -1  14  13    0.89    0.74
   1 -14 -13    1.62    0.66
   1 -14 -13    0.52    0.74
  -1  14  12    0.30    1.03
  -1  14  12   -0.81    1.55
   1 -14 -12    1.26    1.18
   1 -14 -12   -0.89    0.74
  -1  14  12    0.59    0.66
  -1  14  12    0.59    0.74
   1 -14 -12   -0.07    0.59
   1 -14 -12    0.66    0.74
  -1  14  11    0.30    1.03
  -1  14  11    1.92    1.62
   1 -14 -11    2.81    1.18
   1 -14 -11    0.59    0.81
  -1  14  11    0.44    0.74
  -1  14  11    1.33    0.89
   1 -14 -11    0.66    0.66
  -1  14  10    6.57    1.11
   1 -14 -10    9.38    1.18
  -1  14   9   17.21    2.44
  -1  14   9   23.56    1.85
  -1  14   9   26.81    1.70
  -1  14   9   29.10    1.62
   1 -14  -9   27.77    1.48
   1 -14  -9   28.28    1.62
  -1  14   8    0.96    0.89
  -1  14   8    0.44    1.40
   1 -14  -8    0.15    0.74
   1 -14  -8    1.26    0.89
  -1  14   8    0.96    0.74
  -1  14   8    1.77    0.81
   1 -14  -8    0.37    0.74
   1 -14  -8    1.33    0.66
  -1  14   7    3.91    1.48
  -1  14   7    3.32    1.03
   1 -14  -7    3.32    0.96
   1 -14  -7    3.47    0.81
  -1  14   7    3.77    0.81
  -1  14   7    5.17    0.96
   1 -14  -7    5.83    0.89
   1 -14  -7    4.73    0.89
  -1  14   6    3.25    0.96
  -1  14   6    4.28    1.40
   1 -14  -6    3.32    0.74
   1 -14  -6    2.36    0.96
  -1  14   6    2.95    0.81
  -1  14   6    4.50    0.89
   1 -14  -6    3.40    0.74
   1 -14  -6    2.44    0.81
  -1  14   5    1.48    0.89
  -1  14   5    1.26    1.26
   1 -14  -5    0.44    0.81
   1 -14  -5    1.70    0.66
  -1  14   5    0.37    0.74
  -1  14   5    0.30    0.81
   1 -14  -5    1.11    0.74
   1 -14  -5    1.18    0.74
  -1  14   4    1.92    1.18
  -1  14   4    1.33    0.81
   1 -14  -4    0.89    0.81
   1 -14  -4    1.55    0.66
  -1  14   4    1.99    0.81
  -1  14   4    2.07    0.74
   1 -14  -4    2.36    0.74
   1 -14  -4    2.51    0.74
  -1  14   3    0.81    1.11
  -1  14   3   -0.30    0.81
   1 -14  -3    0.52    0.59
   1 -14  -3    0.37    0.74
  -1  14   3    0.59    0.74
  -1  14   3    0.44    0.74
   1 -14  -3    0.00    0.59
   1 -14  -3    0.44    0.66
  -1  14   2    2.73    1.11
  -1  14   2    3.25    1.03
   1 -14  -2    1.85    0.66
   1 -14  -2    2.36    0.89
  -1  14   2    1.92    0.89
   1 -14  -2    3.32    0.81
   1 -14  -2    3.84    0.81
  -1  14   1    1.85    1.03
  -1  14   1   -0.89    0.89
   1 -14  -1    0.74    0.59
   1 -14  -1    1.11    0.81
  -1  14   1    1.03    0.74
  -1  14   1    1.11    0.81
   1 -14  -1    1.33    0.74
   1 -14  -1    1.62    0.66
  -1  14   0    0.74    0.81
  -1  14   0    1.48    0.96
   1 -14   0    1.03    0.89
   1 -14   0    1.70    0.66
  -1  14   0    1.11    0.81
  -1  14   0    1.40    0.74
   1 -14   0    1.99    0.74
   1 -14   0    1.70    0.66
  -1  14  -1    9.82    1.33
  -1  14  -1   10.78    1.26
   1 -14   1    9.82    1.26
   1 -14   1   12.18    1.11
  -1  14  -1   11.59    1.11
  -1  14  -1   12.92    1.18
   1 -14   1   12.18    1.11
   1 -14   1   11.59    1.03
  -1  14  -2    1.85    1.03
  -1  14  -2    0.89    0.81
   1 -14   2    1.18    0.81
   1 -14   2    1.62    0.66
  -1  14  -2    0.44    0.74
  -1  14  -2    0.30    0.74
   1 -14   2    0.81    0.66
   1 -14   2    0.96    0.59
  -1  14  -3    4.80    1.26
  -1  14  -3    6.65    1.33
   1 -14   3    7.68    1.03
  -1  14  -3    8.05    0.96
  -1  14  -3    7.31    0.96
   1 -14   3    7.61    0.89
   1 -14   3    6.13    0.89
  -1  14  -4    0.00    0.74
  -1  14  -4   -0.22    0.74
   1 -14   4    0.74    0.66
   1 -14   4    0.52    0.59
  -1  14  -5    4.80    1.18
  -1  14  -5    4.14    1.26
   1 -14   5    5.76    1.18
   1 -14   5    4.80    1.03
  -1  14  -5    6.13    0.96
  -1  14  -5    5.98    0.89
   1 -14   5    6.57    0.89
   1 -14   5    5.10    0.81
  -1  14  -6    1.92    1.26
  -1  14  -6    0.81    0.89
   1 -14   6    0.52    0.74
   1 -14   6    1.33    0.89
  -1  14  -6    0.07    0.74
  -1  14  -6    0.52    0.66
   1 -14   6    1.03    0.59
   1 -14   6    0.81    0.59
  -1  14  -7    1.26    1.18
  -1  14  -7   -0.74    0.89
   1 -14   7   -0.66    0.89
   1 -14   7    0.89    0.81
  -1  14  -7    0.52    0.66
  -1  14  -7    0.30    0.74
   1 -14   7    0.07    0.59
   1 -14   7    0.52    0.66
  -1  14  -8    5.24    1.33
  -1  14  -8    5.24    1.40
   1 -14   8    6.35    1.33
   1 -14   8   10.63    1.33
  -1  14  -8    7.61    1.03
  -1  14  -8    8.94    0.89
   1 -14   8    8.12    0.89
   1 -14   8    7.53    0.89
  -1  14  -9    0.07    1.11
  -1  14  -9   -0.52    1.03
   1 -14   9    0.66    1.11
   1 -14   9    0.44    0.89
  -1  14  -9    0.66    0.66
  -1  14  -9    1.11    0.59
   1 -14   9    0.66    0.59
   1 -14   9    1.33    0.59
  -1  14 -10    0.07    1.26
  -1  14 -10   -0.15    1.03
   1 -14  10    0.81    1.18
   1 -14  10   -0.22    0.89
   1 -14  10   -0.74    0.52
  -1  14 -11    0.52    1.03
  -1  14 -11   -1.11    1.11
   1 -14  11    0.52    0.96
   1 -14  11   -0.37    1.11
  -1  14 -12   -0.37    1.11
  -1  14 -12    0.30    1.40
   1 -14  12   -1.40    1.33
   1 -14  12    0.15    0.96
  -1  14 -12    1.11    0.52
  -1  14 -12    1.62    0.59
   1 -14  12    1.03    0.44
  -1  14 -13   -1.03    1.11
  -1  14 -13    1.99    1.26
   1 -14  13    0.74    0.81
   1 -14  13    0.66    0.89
  -1  13  20    0.30    1.26
  -1  13  20    0.66    0.96
   1 -13 -20    0.07    1.18
   1 -13 -20   -0.74    1.18
  -1  13  20    0.66    0.66
  -1  13  20    0.22    0.74
   1 -13 -20   -0.59    0.66
   1 -13 -20    0.37    0.59
  -1  13  19    3.25    1.11
  -1  13  19   -0.44    1.48
   1 -13 -19    3.40    1.40
   1 -13 -19    3.69    1.70
  -1  13  19    3.03    0.74
  -1  13  19    4.21    0.89
   1 -13 -19    3.84    0.81
   1 -13 -19    3.54    0.74
  -1  13  18    0.52    0.89
  -1  13  18   -1.85    1.40
   1 -13 -18    1.40    1.26
   1 -13 -18    0.07    1.03
  -1  13  18    1.03    0.74
  -1  13  18    0.00    0.59
   1 -13 -18    1.70    0.66
   1 -13 -18    0.22    0.66
  -1  13  17    2.58    1.62
  -1  13  17    6.13    1.18
   1 -13 -17    4.28    1.48
   1 -13 -17    4.58    1.26
  -1  13  17    5.83    1.03
  -1  13  17    6.42    0.89
   1 -13 -17    4.73    0.89
   1 -13 -17    5.83    0.81
  -1  13  16    3.62    1.48
  -1  13  16    2.14    0.96
   1 -13 -16    1.62    1.03
   1 -13 -16    2.73    1.26
  -1  13  16    1.77    0.66
  -1  13  16    1.62    0.81
   1 -13 -16    1.48    0.74
   1 -13 -16    1.92    0.74
  -1  13  15    2.22    1.62
  -1  13  15    4.28    1.03
   1 -13 -15    3.77    1.11
   1 -13 -15    4.21    1.48
  -1  13  15    3.84    0.96
  -1  13  15    3.69    0.81
   1 -13 -15    2.51    0.74
   1 -13 -15    4.06    0.89
  -1  13  14   -1.03    0.96
  -1  13  14   -1.40    1.40
   1 -13 -14    2.14    1.18
   1 -13 -14   -0.30    0.89
  -1  13  14   -1.62    0.74
  -1  13  14   -0.81    0.66
   1 -13 -14    0.52    0.74
   1 -13 -14   -0.07    0.59
  -1  13  13    1.03    1.62
  -1  13  13    1.48    1.03
   1 -13 -13    1.26    1.03
   1 -13 -13    3.10    1.18
  -1  13  13    0.96    0.81
  -1  13  13    3.54    0.81
   1 -13 -13    1.18    0.66
   1 -13 -13    1.18    0.74
  -1  13  11    8.79    1.33
  -1  13  11   12.55    1.99
   1 -13 -11   10.12    1.26
   1 -13 -11   12.55    1.48
  -1  13  11   14.03    1.18
  -1  13  11   12.26    1.26
   1 -13 -11    9.23    0.96
   1 -13 -11   11.15    1.18
  -1  13  10   25.63    1.92
  -1  13  10   25.55    2.36
   1 -13 -10   27.32    1.77
   1 -13 -10   26.66    1.85
  -1  13  10   23.78    1.48
  -1  13  10   24.67    1.62
   1 -13 -10   23.71    1.48
   1 -13 -10   25.48    1.48
  -1  13   9    3.40    1.55
  -1  13   9    2.88    1.03
   1 -13  -9    5.91    1.11
   1 -13  -9    4.58    0.89
  -1  13   9    4.87    0.89
  -1  13   9    4.06    0.96
   1 -13  -9    6.20    0.81
   1 -13  -9    3.47    0.89
  -1  13   8    0.74    1.33
  -1  13   8   -0.44    0.74
   1 -13  -8    0.74    0.66
   1 -13  -8    0.30    0.81
  -1  13   8    0.59    0.66
  -1  13   8   -0.44    0.74
   1 -13  -8   -0.37    0.66
   1 -13  -8    0.81    0.59
  -1  13   7    0.15    1.33
  -1  13   7    0.07    0.74
   1 -13  -7   -1.40    0.74
   1 -13  -7   -0.37    0.59
  -1  13   7   -0.22    0.74
  -1  13   7   -0.59    0.59
   1 -13  -7   -0.52    0.59
   1 -13  -7   -0.15    0.66
  -1  13   6    8.42    1.11
  -1  13   6    6.94    1.40
   1 -13  -6    7.09    1.03
   1 -13  -6    6.42    0.89
  -1  13   6    5.83    0.96
  -1  13   6    6.57    0.89
   1 -13  -6    6.20    0.96
   1 -13  -6    6.57    0.89
  -1  13   5   47.11    2.58
  -1  13   5   51.25    2.36
   1 -13  -5   55.39    2.29
   1 -13  -5   53.24    2.29
  -1  13   5   47.11    1.99
  -1  13   5   48.74    1.99
   1 -13  -5   49.63    1.92
   1 -13  -5   47.71    1.99
  -1  13   4    9.38    1.18
  -1  13   4   11.45    1.40
   1 -13  -4   10.41    0.96
   1 -13  -4    9.75    1.11
  -1  13   4   10.56    1.03
  -1  13   4   10.63    1.11
   1 -13  -4   10.19    1.03
   1 -13  -4   10.63    1.11
  -1  13   3    1.33    0.89
  -1  13   3    2.29    0.96
   1 -13  -3    1.03    0.74
   1 -13  -3    1.18    0.59
  -1  13   3    2.14    0.74
  -1  13   3    1.92    0.74
  -1  13   2   -0.52    0.89
  -1  13   2    0.07    0.81
   1 -13  -2    0.37    0.59
   1 -13  -2   -0.44    0.66
  -1  13   2   -0.37    0.66
  -1  13   2    1.55    0.81
   1 -13  -2   -0.15    0.66
   1 -13  -2    0.37    0.59
  -1  13   1    8.86    1.18
  -1  13   1    9.45    1.26
   1 -13  -1    8.71    0.89
   1 -13  -1    9.23    1.11
  -1  13   1    8.64    1.03
  -1  13   1   11.00    1.11
   1 -13  -1   10.41    0.96
   1 -13  -1    8.05    0.96
  -1  13   0    3.25    0.89
  -1  13   0    5.17    1.11
   1 -13   0    4.14    0.89
   1 -13   0    4.14    0.74
  -1  13   0    5.10    0.89
  -1  13   0    3.84    0.81
   1 -13   0    4.73    0.81
   1 -13   0    3.91    0.74
  -1  13  -1   15.14    1.40
  -1  13  -1   19.94    1.70
   1 -13   1   17.80    1.40
   1 -13   1   18.31    1.26
  -1  13  -1   19.42    1.33
  -1  13  -1   19.50    1.33
   1 -13   1   18.02    1.26
   1 -13   1   20.46    1.26
  -1  13  -2    1.40    0.96
  -1  13  -2    2.51    0.89
   1 -13   2    2.44    0.89
   1 -13   2    1.99    0.66
  -1  13  -2    1.99    0.81
  -1  13  -2    2.14    0.74
   1 -13   2    1.55    0.66
   1 -13   2    3.03    0.66
  -1  13  -3   -0.15    0.96
  -1  13  -3    0.00    0.74
   1 -13   3   -0.22    0.52
   1 -13   3   -0.22    0.74
  -1  13  -3   -0.15    0.74
  -1  13  -3   -0.37    0.66
   1 -13   3   -0.74    0.59
   1 -13   3    0.74    0.59
  -1  13  -4    0.74    0.96
  -1  13  -4    1.03    0.81
   1 -13   4    0.44    0.81
   1 -13   4    0.44    0.59
  -1  13  -4   -0.52    0.66
  -1  13  -4    0.44    0.66
   1 -13   4   -0.15    0.59
   1 -13   4    0.22    0.59
  -1  13  -5   16.99    1.70
  -1  13  -5   15.73    1.40
   1 -13   5   17.80    1.40
   1 -13   5   18.39    1.55
  -1  13  -5   18.68    1.33
  -1  13  -5   18.76    1.33
   1 -13   5   17.95    1.18
   1 -13   5   15.66    1.11
  -1  13  -6    0.37    1.18
   1 -13   6    0.59    0.66
  -1  13  -6    0.66    0.81
  -1  13  -6    0.81    0.74
   1 -13   6    0.52    0.59
   1 -13   6    1.18    0.66
  -1  13  -7    9.01    1.48
   1 -13   7   10.78    1.48
  -1  13  -7   14.33    1.18
  -1  13  -7   12.04    1.26
   1 -13   7   13.37    1.03
  -1  13  -8    4.43    1.40
  -1  13  -8    4.43    1.11
   1 -13   8    4.21    1.18
   1 -13   8    7.02    1.18
   1 -13   8    5.69    0.81
  -1  13  -9    1.33    0.96
  -1  13  -9   -0.30    1.18
   1 -13   9    1.77    0.96
   1 -13   9   -0.15    0.74
  -1  13 -10   -0.30    1.03
  -1  13 -10   -0.07    1.11
   1 -13  10   -0.07    0.81
   1 -13  10   -1.18    1.03
   1 -13  10    0.66    0.59
  -1  13 -11    1.33    1.11
  -1  13 -11    0.52    1.03
   1 -13  11    1.55    1.18
   1 -13  11    2.22    0.96
  -1  13 -11    0.96    0.66
  -1  13 -11    0.15    0.52
   1 -13  11    0.52    0.52
  -1  13 -12    0.59    1.11
  -1  13 -12   -0.07    1.11
   1 -13  12    1.11    0.96
   1 -13  12    1.03    1.33
  -1  13 -12    0.15    0.44
  -1  13 -12    0.15    0.59
   1 -13  12   -0.37    0.44
   1 -13  12    0.22    0.44
  -1  13 -13   -1.18    0.96
  -1  13 -13   -0.15    1.26
   1 -13  13    0.30    1.18
   1 -13  13   -0.22    1.03
  -1  13 -13    0.74    0.52
  -1  13 -13   -0.22    0.44
   1 -13  13   -0.37    0.44
   1 -13  13    0.44    0.44
  -1  13 -14   -0.15    1.26
  -1  13 -14    0.15    1.11
   1 -13  14    0.66    1.03
   1 -13  14    0.89    0.89
  -1  12  21   -0.30    1.11
  -1  12  21    0.59    0.96
   1 -12 -21    3.32    1.33
   1 -12 -21   -1.18    1.18
  -1  12  21   -0.59    0.74
  -1  12  21   -0.44    0.59
   1 -12 -21   -0.15    0.66
   1 -12 -21   -0.59    0.59
  -1  12  20    2.07    1.03
  -1  12  20    2.73    1.55
   1 -12 -20    2.88    1.33
   1 -12 -20    1.70    1.62
   1 -12 -20    3.77    0.74
   1 -12 -20    3.40    0.81
  -1  12  19    0.22    1.40
  -1  12  19   -0.96    0.89
   1 -12 -19    1.40    1.33
   1 -12 -19    1.11    1.11
  -1  12  19    0.37    0.59
  -1  12  19    1.03    0.74
   1 -12 -19   -0.74    0.59
   1 -12 -19    0.74    0.66
  -1  12  18    3.77    1.62
  -1  12  18    4.50    1.11
   1 -12 -18    3.40    1.18
   1 -12 -18    5.98    1.70
   1 -12 -18    6.28    0.96
   1 -12 -18    5.10    0.89
  -1  12  17    2.51    0.96
  -1  12  17    0.59    1.48
   1 -12 -17    1.11    1.11
   1 -12 -17    3.10    1.55
  -1  12  17    3.32    0.89
  -1  12  17    2.36    0.74
   1 -12 -17    3.69    0.81
   1 -12 -17    1.99    0.74
  -1  12  16   31.61    1.70
  -1  12  16   29.39    1.77
   1 -12 -16   31.53    1.62
   1 -12 -16   34.56    1.77
   1 -12 -15   58.78    2.95
   1 -12 -15   57.68    2.81
   1 -12 -15   56.94    2.29
   1 -12 -15   54.43    2.14
  -1  12  14   11.22    1.26
   1 -12 -14    9.67    1.03
  -1  12  13   -0.66    1.40
  -1  12  13    0.59    0.81
   1 -12 -13   -0.37    0.89
   1 -12 -13    1.40    1.03
  -1  12  13   -0.30    0.59
   1 -12 -13    0.37    0.74
  -1  12  12    1.11    1.40
  -1  12  12    0.00    0.81
   1 -12 -12    0.89    1.03
   1 -12 -12    0.07    0.81
  -1  12  12    0.89    0.81
  -1  12  12    1.33    0.66
   1 -12 -12    0.44    0.74
   1 -12 -12    0.66    0.66
  -1  12  11   12.85    1.40
  -1  12  11   13.14    1.92
   1 -12 -11   14.10    1.33
   1 -12 -11   11.74    1.40
  -1  12  11   14.25    1.18
  -1  12  11   13.81    1.26
   1 -12 -11   15.66    1.26
   1 -12 -11   14.55    1.18
  -1  12  10   20.83    2.14
  -1  12  10   19.27    1.62
   1 -12 -10   20.97    1.62
   1 -12 -10   18.09    1.48
  -1  12  10   19.50    1.33
  -1  12  10   17.58    1.40
   1 -12 -10   20.31    1.40
   1 -12 -10   18.91    1.26
  -1  12   9   69.05    2.95
  -1  12   9   59.30    3.18
   1 -12  -9   61.96    2.66
   1 -12  -9   64.17    2.73
  -1  12   9   65.28    2.29
  -1  12   9   63.44    2.36
   1 -12  -9   65.58    2.29
   1 -12  -9   68.16    2.44
  -1  12   8    5.02    0.96
  -1  12   8    4.36    1.33
   1 -12  -8    6.13    0.89
   1 -12  -8    5.17    1.03
  -1  12   8    4.50    0.81
  -1  12   8    5.02    0.89
   1 -12  -8    4.95    0.89
   1 -12  -8    4.50    0.81
  -1  12   7   18.68    1.77
  -1  12   7   18.09    1.40
   1 -12  -7   19.27    1.40
   1 -12  -7   18.54    1.33
  -1  12   7   19.94    1.33
  -1  12   7   16.84    1.26
   1 -12  -7   20.83    1.26
   1 -12  -7   17.50    1.26
  -1  12   6    0.66    1.03
  -1  12   6   -0.07    0.74
   1 -12  -6    0.74    0.59
   1 -12  -6    0.66    0.66
  -1  12   6    0.22    0.66
  -1  12   6    0.96    0.74
   1 -12  -6    0.52    0.59
   1 -12  -6    0.81    0.74
  -1  12   5   13.00    1.26
  -1  12   5   14.55    1.48
   1 -12  -5   13.51    1.11
   1 -12  -5   12.70    1.18
  -1  12   5   12.33    1.03
  -1  12   5   11.82    1.11
   1 -12  -5   12.18    1.03
   1 -12  -5   12.92    1.11
  -1  12   4   35.52    2.07
  -1  12   4   35.96    1.92
   1 -12  -4   38.99    1.77
   1 -12  -4   39.14    1.85
  -1  12   4   34.56    1.70
  -1  12   4   34.93    1.62
   1 -12  -4   33.60    1.62
   1 -12  -4   33.75    1.55
  -1  12   3    0.96    0.74
  -1  12   3    0.44    0.89
   1 -12  -3    1.40    0.59
   1 -12  -3    2.66    0.74
  -1  12   3    1.48    0.66
  -1  12   3    0.37    0.74
   1 -12  -3    1.77    0.66
   1 -12  -3    1.33    0.66
  -1  12   2    3.69    0.96
  -1  12   2    5.69    1.03
   1 -12  -2    3.03    0.81
   1 -12  -2    4.21    0.74
  -1  12   2    5.32    0.89
  -1  12   2    5.10    0.81
   1 -12  -2    4.58    0.74
   1 -12  -2    4.58    0.89
  -1  12   1   65.13    2.73
  -1  12   1   70.75    3.03
   1 -12  -1   68.83    2.58
   1 -12  -1   70.30    2.81
  -1  12   1   65.28    2.29
  -1  12   1   70.82    2.29
  -1  12   0   21.79    1.55
  -1  12   0   21.49    1.62
   1 -12   0   21.34    1.33
   1 -12   0   21.27    1.48
  -1  12   0   22.52    1.33
  -1  12   0   22.15    1.40
   1 -12   0   25.33    1.33
   1 -12   0   22.75    1.33
  -1  12  -1   17.28    1.33
  -1  12  -1   21.27    1.62
   1 -12   1   16.76    1.33
   1 -12   1   17.65    1.18
  -1  12  -1   17.43    1.33
   1 -12   1   18.98    1.18
   1 -12   1   18.76    1.18
  -1  12  -2    2.14    0.81
  -1  12  -2    1.26    0.89
   1 -12   2    1.85    0.59
   1 -12   2    0.96    0.74
  -1  12  -2    1.85    0.74
  -1  12  -2    1.77    0.74
   1 -12   2    0.37    0.59
   1 -12   2    1.55    0.66
  -1  12  -3    0.15    0.74
  -1  12  -3   -0.22    0.89
   1 -12   3    0.81    0.74
   1 -12   3   -0.15    0.52
  -1  12  -3    0.44    0.74
  -1  12  -3    0.22    0.66
   1 -12   3    0.81    0.66
   1 -12   3    0.89    0.59
  -1  12  -4    1.55    1.03
  -1  12  -4    3.77    0.81
   1 -12   4    1.33    0.81
   1 -12   4    2.29    0.66
   1 -12   4    1.99    0.66
  -1  12  -5    1.18    0.96
  -1  12  -5   -0.59    0.66
   1 -12   5    0.22    0.81
   1 -12   5    0.81    0.59
  -1  12  -6    0.44    1.11
  -1  12  -6    0.66    0.74
   1 -12   6    0.74    0.66
   1 -12   6    0.00    0.81
  -1  12  -7    0.37    1.18
  -1  12  -7   -0.07    0.66
   1 -12   7   -0.15    0.59
   1 -12   7   -0.96    0.81
  -1  12  -7   -0.07    0.74
  -1  12  -7   -0.22    0.81
   1 -12   7   -0.07    0.59
  -1  12  -8    0.66    0.89
  -1  12  -8    0.44    1.18
   1 -12   8    0.44    0.66
  -1  12  -8    0.96    0.74
  -1  12  -8    0.37    0.66
   1 -12   8    1.48    0.59
  -1  12  -9    0.30    0.81
   1 -12   9    0.96    0.96
  -1  12  -9    0.74    0.66
  -1  12  -9    1.03    0.66
   1 -12   9    1.18    0.59
   1 -12   9    0.74    0.59
  -1  12 -10    0.74    0.89
  -1  12 -10   -0.30    0.96
   1 -12  10    1.03    0.81
   1 -12  10    0.59    0.96
  -1  12 -10    1.03    0.66
  -1  12 -10    1.26    0.59
   1 -12  10    0.96    0.59
   1 -12  10    1.40    0.59
  -1  12 -11    1.40    1.03
  -1  12 -11    1.77    1.03
   1 -12  11    0.37    0.74
   1 -12  11   -0.22    0.96
  -1  12 -11    0.81    0.59
  -1  12 -11    0.59    0.52
   1 -12  11    0.07    0.52
   1 -12  11    0.96    0.52
  -1  12 -12    0.44    1.03
  -1  12 -12    0.44    1.03
   1 -12  12    0.52    1.11
   1 -12  12    0.96    0.89
  -1  12 -12   -0.15    0.44
  -1  12 -12    0.52    0.59
   1 -12  12    0.30    0.44
   1 -12  12    1.03    0.44
  -1  12 -13    3.84    1.26
  -1  12 -13    0.74    1.11
   1 -12  13    2.44    1.40
   1 -12  13    2.36    1.03
  -1  12 -13    1.77    0.59
  -1  12 -13    1.26    0.52
   1 -12  13    2.22    0.52
   1 -12  13    1.40    0.52
  -1  12 -14   -0.15    1.03
  -1  12 -14   -1.33    1.03
   1 -12  14    0.00    1.18
   1 -12  14    1.62    1.03
  -1  12 -14    0.37    0.44
  -1  12 -14   -0.30    0.44
   1 -12  14    0.07    0.37
   1 -12  14    0.07    0.37
  -1  12 -15   -0.44    1.26
  -1  12 -15    0.89    1.26
   1 -12  15    0.37    1.11
   1 -12  15   -0.37    0.89
  -1  12 -16    0.81    1.11
   1 -12  16   -0.52    0.96
  -1  11  22    0.00    1.11
   1 -11 -22    0.00    1.18
  -1  11  22   -0.15    0.59
  -1  11  22    0.74    0.52
   1 -11 -22   -0.07    0.66
   1 -11 -22    0.07    0.59
  -1  11  21    2.66    1.03
  -1  11  21    0.37    1.11
   1 -11 -21    1.11    1.40
   1 -11 -21    3.25    1.18
  -1  11  21    2.66    0.81
  -1  11  21    3.40    0.74
   1 -11 -21    2.88    0.74
   1 -11 -21    2.88    0.81
  -1  11  20   -0.30    1.33
  -1  11  20    1.48    0.89
   1 -11 -20    0.59    1.18
   1 -11 -20    0.07    1.03
  -1  11  20    0.15    0.59
   1 -11 -20    0.00    0.66
   1 -11 -20    0.22    0.52
  -1  11  19    5.39    1.62
  -1  11  19    3.47    1.03
   1 -11 -19    5.39    1.33
   1 -11 -19    0.96    1.48
  -1  11  19    4.58    0.96
  -1  11  19    4.65    0.81
   1 -11 -19    5.61    0.96
   1 -11 -19    3.84    0.74
  -1  11  18    4.43    1.03
  -1  11  18    3.91    1.62
   1 -11 -18    3.77    1.26
   1 -11 -18    2.07    1.62
  -1  11  18    5.10    1.03
  -1  11  18    4.21    0.81
   1 -11 -18    5.32    0.89
   1 -11 -18    5.54    0.89
  -1  11  17    0.22    0.81
  -1  11  17    2.29    1.33
   1 -11 -17   -1.62    1.18
   1 -11 -17    0.22    1.03
  -1  11  17    0.66    0.66
  -1  11  17    1.26    0.81
   1 -11 -17   -0.07    0.66
   1 -11 -17    0.15    0.66
  -1  11  16   -0.44    0.81
  -1  11  16    0.44    1.26
   1 -11 -16   -0.22    0.96
   1 -11 -16   -0.74    0.96
  -1  11  16   -0.59    0.74
  -1  11  16   -0.07    0.59
   1 -11 -16    0.66    0.74
   1 -11 -16   -0.37    0.59
  -1  11  14    2.66    1.33
  -1  11  14    1.03    0.81
   1 -11 -14    0.22    0.89
   1 -11 -14    0.96    1.11
  -1  11  14    0.59    0.81
  -1  11  14    0.66    0.66
   1 -11 -14    1.03    0.66
   1 -11 -14    0.81    0.74
  -1  11  13   10.49    1.85
  -1  11  13   14.25    1.33
   1 -11 -13   13.37    1.48
   1 -11 -13   14.25    1.40
  -1  11  13   14.33    1.18
  -1  11  13   17.28    1.40
   1 -11 -13   14.77    1.26
   1 -11 -13   13.14    1.18
  -1  11  12   53.17    2.44
  -1  11  12   52.51    3.03
   1 -11 -12   63.51    2.73
   1 -11 -12   63.88    2.81
   1 -11 -12   57.23    2.22
   1 -11 -12   57.97    2.14
  -1  11  11    0.22    0.66
  -1  11  11   -0.07    1.33
   1 -11 -11    0.15    0.96
   1 -11 -11    1.11    0.74
  -1  11  11   -0.15    0.66
  -1  11  11    1.40    0.66
   1 -11 -11   -0.59    0.59
   1 -11 -11   -0.07    0.66
  -1  11  10   37.44    1.99
  -1  11  10   43.79    2.66
   1 -11 -10   38.55    2.07
   1 -11 -10   42.39    2.14
  -1  11  10   37.88    1.85
  -1  11  10   40.17    1.77
   1 -11 -10   39.66    1.70
   1 -11 -10   40.10    1.85
  -1  11   9   -0.15    1.11
  -1  11   9    0.00    0.74
   1 -11  -9    1.92    0.74
   1 -11  -9    0.52    0.89
  -1  11   9    1.48    0.66
  -1  11   9    1.40    0.74
   1 -11  -9    1.33    0.66
   1 -11  -9    0.07    0.66
  -1  11   8    0.44    0.66
  -1  11   8    0.15    1.11
   1 -11  -8    0.74    0.74
   1 -11  -8    0.74    0.66
  -1  11   8    1.48    0.74
  -1  11   8   -0.15    0.59
   1 -11  -8   -0.07    0.59
   1 -11  -8    0.15    0.66
  -1  11   7    7.09    1.33
  -1  11   7    7.75    1.03
   1 -11  -7    8.12    1.03
   1 -11  -7    7.68    0.96
  -1  11   7    7.61    0.96
  -1  11   7    7.46    0.89
   1 -11  -7    7.61    0.89
   1 -11  -7    8.64    0.96
  -1  11   6   16.47    1.33
  -1  11   6   16.91    1.55
   1 -11  -6   20.38    1.33
   1 -11  -6   18.02    1.33
  -1  11   6   19.20    1.33
  -1  11   6   20.09    1.26
   1 -11  -6   20.38    1.26
   1 -11  -6   18.68    1.18
  -1  11   5   -0.22    0.66
  -1  11   5    0.15    0.89
   1 -11  -5    0.30    0.59
   1 -11  -5   -0.89    0.66
  -1  11   5   -0.66    0.66
  -1  11   5    0.81    0.59
   1 -11  -5   -0.74    0.52
   1 -11  -5    0.44    0.66
  -1  11   4   47.19    2.29
  -1  11   4   51.47    2.29
   1 -11  -4   49.85    2.14
   1 -11  -4   51.99    2.14
  -1  11   4   51.03    1.99
  -1  11   4   48.07    1.85
   1 -11  -4   49.03    1.77
   1 -11  -4   48.52    1.85
  -1  11   3   53.54    2.36
  -1  11   3   51.77    2.36
   1 -11  -3   54.35    2.22
   1 -11  -3   55.76    2.22
  -1  11   3   50.96    1.99
  -1  11   3   51.40    1.92
   1 -11  -3   48.96    1.77
   1 -11  -3   53.32    1.99
  -1  11   2    5.02    0.96
  -1  11   2    4.50    0.96
   1 -11  -2    4.87    0.74
   1 -11  -2    3.18    0.81
  -1  11   2    5.10    0.81
  -1  11   2    3.25    0.81
   1 -11  -2    3.99    0.74
   1 -11  -2    5.24    0.74
  -1  11   1   44.38    2.07
  -1  11   1   49.70    2.36
   1 -11  -1   46.45    1.99
   1 -11  -1   46.30    2.07
  -1  11   1   47.41    1.85
  -1  11   1   45.64    1.85
   1 -11  -1   45.56    1.77
   1 -11  -1   46.23    1.70
  -1  11   0    2.95    0.74
  -1  11   0    4.73    0.96
   1 -11   0    3.40    0.81
   1 -11   0    2.07    0.66
  -1  11   0    3.54    0.74
  -1  11   0    3.25    0.74
   1 -11   0    3.77    0.81
   1 -11   0    3.77    0.66
  -1  11  -1   99.47    3.69
  -1  11  -1  100.21    3.54
   1 -11   1  100.43    3.40
   1 -11   1   99.92    3.47
   1 -11   1  102.50    2.73
  -1  11  -2   14.70    1.40
  -1  11  -2   13.37    1.18
   1 -11   2   12.55    1.18
   1 -11   2   15.95    1.11
  -1  11  -3   13.14    1.40
  -1  11  -3   11.96    1.11
   1 -11   3   13.81    1.26
   1 -11   3   14.03    1.11
  -1  11  -3    9.97    1.03
   1 -11   3   12.48    1.03
  -1  11  -4    8.34    1.26
  -1  11  -4    9.82    1.03
   1 -11   4    8.79    0.96
   1 -11   4    8.49    1.11
  -1  11  -4    9.53    0.96
  -1  11  -4   10.41    1.03
   1 -11   4    9.82    0.89
   1 -11   4   10.86    0.96
  -1  11  -5   71.85    2.81
  -1  11  -5   70.89    3.10
   1 -11   5   70.38    2.88
   1 -11   5   75.84    2.88
  -1  11  -5   75.77    2.36
  -1  11  -5   74.00    2.29
   1 -11   5   79.90    2.29
   1 -11   5   78.50    2.29
  -1  11  -6   15.43    1.26
  -1  11  -6   15.88    1.70
   1 -11   6   14.77    1.26
   1 -11   6   15.73    1.33
  -1  11  -6   14.92    1.18
  -1  11  -6   16.39    1.11
  -1  11  -7    0.07    1.11
  -1  11  -7   -0.44    0.66
   1 -11   7    0.22    0.66
   1 -11   7    0.81    0.81
  -1  11  -7    0.59    0.66
  -1  11  -7   -0.15    0.66
   1 -11   7   -0.22    0.52
   1 -11   7    1.03    0.59
  -1  11  -8    2.73    0.81
  -1  11  -8    1.48    1.18
   1 -11   8    2.07    0.89
   1 -11   8    2.07    0.66
  -1  11  -8    1.77    0.74
  -1  11  -8    2.14    0.74
   1 -11   8    2.29    0.66
   1 -11   8    2.22    0.66
  -1  11  -9   11.89    1.77
  -1  11  -9   13.37    1.33
   1 -11   9   12.63    1.26
   1 -11   9   12.85    1.40
  -1  11  -9   10.71    1.03
  -1  11  -9   13.88    1.03
   1 -11   9   12.85    0.96
   1 -11   9   12.63    0.96
  -1  11 -10   12.78    1.03
  -1  11 -10   15.06    1.03
   1 -11  10   13.07    0.96
   1 -11  10   14.62    0.96
  -1  11 -11   -0.22    1.03
  -1  11 -11   -1.11    0.74
   1 -11  11    0.00    0.89
   1 -11  11    0.59    0.74
  -1  11 -11    0.37    0.52
  -1  11 -11    0.37    0.59
   1 -11  11    0.81    0.52
   1 -11  11    1.03    0.52
   1 -11  12    9.23    1.48
   1 -11  12   10.04    1.26
  -1  11 -12    9.53    0.89
  -1  11 -12    9.45    0.81
   1 -11  12    9.53    0.74
   1 -11  12    8.94    0.74
  -1  11 -13    0.07    1.11
  -1  11 -13    3.10    1.18
   1 -11  13    2.51    0.96
   1 -11  13   -0.44    1.11
  -1  11 -13    2.14    0.59
  -1  11 -13    1.99    0.52
   1 -11  13    2.73    0.52
   1 -11  13    1.33    0.44
  -1  11 -14    0.81    1.03
  -1  11 -14   -0.07    1.11
   1 -11  14    0.89    1.26
   1 -11  14    1.03    0.89
  -1  11 -14    0.37    0.44
  -1  11 -14   -0.07    0.52
   1 -11  14    0.59    0.44
   1 -11  14    0.07    0.37
  -1  11 -15   -0.74    1.03
  -1  11 -15    0.52    1.03
   1 -11  15    0.81    1.26
   1 -11  15    0.37    0.96
  -1  11 -15    0.00    0.44
  -1  11 -15   -0.22    0.44
   1 -11  15    0.30    0.37
   1 -11  15   -0.22    0.37
  -1  11 -16    0.37    1.18
  -1  11 -16   -0.22    1.26
   1 -11  16    1.11    1.18
   1 -11  16   -0.15    1.03
  -1  11 -16    0.74    0.44
  -1  11 -17    0.66    1.11
  -1  11 -17   -0.74    1.18
   1 -11  17   -0.07    1.03
  -1  10  22    1.18    1.03
   1 -10 -22    1.33    1.26
   1 -10 -22    0.59    1.26
  -1  10  22    2.22    0.74
  -1  10  22    1.85    0.66
   1 -10 -22    0.74    0.59
   1 -10 -22    2.29    0.66
  -1  10  21    1.18    0.89
  -1  10  21    2.73    1.26
   1 -10 -21   -0.81    1.11
   1 -10 -21    1.03    1.26
  -1  10  21    1.62    0.74
  -1  10  21    2.73    0.66
   1 -10 -21    1.48    0.66
  -1  10  20    5.39    1.48
  -1  10  20    8.57    1.26
  -1  10  20    8.42    1.03
  -1  10  20    6.94    0.89
   1 -10 -20    9.75    1.03
   1 -10 -20    8.05    0.96
  -1  10  19    9.75    1.26
  -1  10  19    8.57    1.85
   1 -10 -19    8.34    1.48
   1 -10 -19   11.00    1.85
  -1  10  19   10.04    1.18
   1 -10 -19    9.45    0.96
   1 -10 -19    9.97    1.03
   1 -10 -18   19.72    2.29
   1 -10 -18   16.54    1.77
  -1  10  18   19.42    1.33
  -1  10  18   18.46    1.48
   1 -10 -18   18.46    1.33
   1 -10 -18   18.54    1.33
  -1  10  17    7.09    1.18
  -1  10  17    6.87    1.55
   1 -10 -17    8.64    1.48
   1 -10 -17    8.12    1.33
  -1  10  17    9.01    1.11
  -1  10  17    7.16    0.96
   1 -10 -17    8.27    1.03
   1 -10 -17    7.98    0.96
  -1  10  15    1.11    0.81
  -1  10  15    1.11    1.26
   1 -10 -15    0.52    0.96
   1 -10 -15    1.40    0.96
  -1  10  15    0.81    0.66
  -1  10  15    1.48    0.81
   1 -10 -15    0.74    0.66
   1 -10 -15    1.48    0.74
  -1  10  14   11.74    1.62
  -1  10  14   16.54    1.40
  -1  10  14   14.99    1.33
  -1  10  14   15.73    1.18
   1 -10 -14   13.66    1.11
   1 -10 -14   14.10    1.26
  -1  10  13   49.92    2.88
  -1  10  13   53.02    2.36
   1 -10 -13   53.91    2.51
   1 -10 -13   54.20    2.51
  -1  10  13   53.24    2.22
  -1  10  13   51.32    1.99
   1 -10 -13   54.13    2.14
   1 -10 -13   49.85    1.99
  -1  10  12   17.06    1.33
  -1  10  12   19.20    1.92
   1 -10 -12   16.39    1.40
   1 -10 -12   16.39    1.48
  -1  10  12   18.31    1.40
  -1  10  12   15.66    1.18
   1 -10 -12   15.88    1.26
   1 -10 -12   16.02    1.18
  -1  10  11   46.23    2.66
  -1  10  11   51.99    2.29
   1 -10 -11   54.13    2.44
   1 -10 -11   54.43    2.44
  -1  10  11   46.15    1.99
  -1  10  11   49.63    1.92
   1 -10 -11   50.88    1.99
   1 -10 -11   49.26    1.85
  -1  10  10    8.71    0.96
  -1  10  10    8.71    1.48
   1 -10 -10    9.45    1.18
   1 -10 -10    9.38    1.11
  -1  10  10   10.41    1.03
  -1  10  10   10.63    1.11
   1 -10 -10    8.94    1.03
   1 -10 -10   10.71    0.96
  -1  10   9  110.11    3.84
  -1  10   9  118.08    4.36
   1 -10  -9  116.68    3.99
   1 -10  -9  109.74    3.84
  -1  10   9  112.40    3.10
  -1  10   9  109.15    3.18
   1 -10  -9  109.07    3.10
   1 -10  -9  114.09    3.10
  -1  10   8    1.26    1.11
  -1  10   8   -0.52    0.66
   1 -10  -8   -0.30    0.74
   1 -10  -8    0.74    0.66
  -1  10   8    0.30    0.59
  -1  10   8    0.07    0.66
   1 -10  -8    0.66    0.66
   1 -10  -8    0.81    0.59
  -1  10   7   -0.15    0.96
  -1  10   7    0.22    0.74
   1 -10  -7    0.81    0.74
   1 -10  -7   -0.81    0.59
  -1  10   7   -0.30    0.59
  -1  10   7    0.30    0.66
   1 -10  -7   -0.89    0.59
   1 -10  -7    0.30    0.59
  -1  10   6   10.19    1.03
  -1  10   6   10.26    1.26
   1 -10  -6    9.45    1.03
   1 -10  -6   11.22    0.96
  -1  10   6    9.82    0.96
  -1  10   6   10.93    1.03
   1 -10  -6   12.26    1.03
   1 -10  -6    9.82    0.96
  -1  10   5   11.45    1.11
  -1  10   5   12.55    1.26
   1 -10  -5   11.74    1.03
   1 -10  -5   11.52    1.03
  -1  10   5   10.56    0.96
  -1  10   5   10.19    1.03
   1 -10  -5   10.93    1.03
   1 -10  -5   13.81    1.03
  -1  10   4   30.72    1.77
  -1  10   4   35.96    1.77
   1 -10  -4   35.52    1.70
   1 -10  -4   35.08    1.62
  -1  10   4   34.49    1.55
  -1  10   4   32.49    1.55
   1 -10  -4   31.09    1.48
   1 -10  -4   35.89    1.48
  -1  10   3  113.73    3.91
  -1  10   3  111.81    3.84
   1 -10  -3  119.04    3.91
   1 -10  -3  115.50    3.77
  -1  10   3  116.24    3.18
  -1  10   3  116.68    3.10
   1 -10  -3  118.82    3.10
   1 -10  -3  117.05    3.03
  -1  10   2   14.33    1.26
  -1  10   2   13.00    1.11
   1 -10  -2   13.96    1.11
   1 -10  -2   13.74    1.03
  -1  10   2   11.96    1.11
   1 -10  -2   14.47    1.03
  -1  10   1    5.46    0.96
  -1  10   1    5.17    0.81
   1 -10  -1    4.58    0.81
   1 -10  -1    6.13    0.81
  -1  10   0   88.03    3.32
  -1  10   0   92.09    3.25
   1 -10   0   88.77    3.18
   1 -10   0   95.04    3.25
  -1  10   0   87.14    2.51
   1 -10   0   94.89    2.58
  -1  10  -1   97.77    3.62
  -1  10  -1   98.81    3.40
   1 -10   1   99.18    3.40
   1 -10   1   98.22    3.32
  -1  10  -1  101.02    2.73
  -1  10  -1   96.74    2.73
   1 -10   1   91.65    2.58
  -1  10  -2   11.67    1.03
  -1  10  -2   12.11    1.33
   1 -10   2   12.55    1.03
   1 -10   2   14.40    1.18
  -1  10  -2   12.55    1.03
  -1  10  -2   13.29    1.03
   1 -10   2   12.78    0.96
   1 -10   2   13.07    0.96
  -1  10  -3   42.98    2.29
  -1  10  -3   42.91    1.92
   1 -10   3   44.09    1.92
   1 -10   3   44.90    2.07
   1 -10   3   40.91    1.55
   1 -10   3   45.86    1.62
  -1  10  -4    4.14    0.74
  -1  10  -4    2.88    0.96
   1 -10   4    4.95    0.74
   1 -10   4    4.14    0.81
  -1  10  -4    4.50    0.74
  -1  10  -4    4.36    0.74
   1 -10   4    5.39    0.74
   1 -10   4    4.65    0.66
  -1  10  -5   47.56    2.07
  -1  10  -5   45.93    2.36
   1 -10   5   52.58    2.22
   1 -10   5   51.62    2.29
  -1  10  -5   50.14    1.85
  -1  10  -5   47.78    1.77
   1 -10   5   48.07    1.70
   1 -10   5   47.04    1.62
  -1  10  -6   29.39    2.07
  -1  10  -6   33.31    1.77
   1 -10   6   29.54    1.62
   1 -10   6   30.57    1.77
  -1  10  -6   29.32    1.48
  -1  10  -6   33.16    1.48
   1 -10   6   32.64    1.33
   1 -10   6   31.16    1.33
  -1  10  -7    7.53    1.33
  -1  10  -7    8.12    1.03
   1 -10   7    6.50    0.89
   1 -10   7    8.42    1.11
  -1  10  -7    6.06    0.81
  -1  10  -7    5.54    0.81
   1 -10   7    5.91    0.74
   1 -10   7    6.50    0.74
  -1  10  -8    0.66    0.66
  -1  10  -8    1.92    1.11
   1 -10   8   -0.74    0.81
   1 -10   8   -0.44    0.52
  -1  10  -8    0.30    0.59
  -1  10  -8    0.30    0.59
   1 -10   8    0.96    0.52
   1 -10   8    0.22    0.52
  -1  10  -9   38.11    1.99
  -1  10  -9   35.89    2.44
   1 -10   9   38.03    1.92
   1 -10   9   34.19    2.07
  -1  10 -10   81.90    3.18
  -1  10 -10   89.95    3.91
   1 -10  10   91.05    3.40
   1 -10  10   91.65    3.69
   1 -10  10   86.33    2.29
   1 -10  10   87.14    2.36
  -1  10 -11   54.06    2.95
  -1  10 -11   51.47    2.44
  -1  10 -11   50.29    1.85
  -1  10 -11   51.69    1.70
   1 -10  11   53.47    1.70
   1 -10  11   53.24    1.70
  -1  10 -12    8.27    1.70
  -1  10 -12    3.69    1.03
   1 -10  12    8.49    1.40
  -1  10 -12    9.75    0.89
  -1  10 -12    8.79    0.81
   1 -10  12    9.53    0.81
   1 -10  12    9.90    0.74
  -1  10 -13   14.55    1.55
  -1  10 -13   13.44    1.70
   1 -10  13   14.18    1.40
   1 -10  13   14.25    1.70
  -1  10 -13   11.67    0.96
  -1  10 -13   11.82    0.89
   1 -10  13   11.96    0.81
   1 -10  13   12.11    0.81
  -1  10 -14    0.00    0.96
  -1  10 -14    0.22    1.03
   1 -10  14   -0.66    1.03
   1 -10  14   -0.44    0.81
  -1  10 -14   -0.44    0.52
  -1  10 -14    0.07    0.44
   1 -10  14    0.22    0.44
   1 -10  14    0.44    0.44
  -1  10 -15    3.25    1.26
  -1  10 -15    3.10    1.26
   1 -10  15    5.17    1.11
   1 -10  15    5.10    1.48
  -1  10 -15    5.10    0.66
  -1  10 -15    4.28    0.59
   1 -10  15    3.77    0.52
   1 -10  15    4.43    0.59
  -1  10 -16   -0.30    1.03
  -1  10 -16   -0.15    0.96
   1 -10  16   -0.89    0.89
   1 -10  16    0.89    1.18
  -1  10 -16    0.44    0.44
  -1  10 -16    0.59    0.44
   1 -10  16    0.30    0.37
   1 -10  16    0.00    0.44
  -1  10 -17   -1.33    1.11
  -1  10 -17   -0.89    1.11
   1 -10  17   -0.66    0.96
   1 -10  17    0.52    1.18
  -1  10 -17    0.37    0.44
  -1  10 -18   -0.15    1.03
  -1   9  23   -0.44    1.18
   1  -9 -23    1.18    1.26
  -1   9  23    1.77    0.74
  -1   9  23    1.26    0.59
   1  -9 -23    1.40    0.66
   1  -9 -23    0.44    0.59
  -1   9  22    0.00    0.81
   1  -9 -22   -0.81    1.11
   1  -9 -22   -0.22    1.18
  -1   9  22    0.59    0.66
  -1   9  22    0.44    0.52
   1  -9 -22    0.22    0.59
   1  -9 -22    0.22    0.52
  -1   9  21    0.15    0.89
  -1   9  21    0.00    1.03
   1  -9 -21    0.52    1.03
   1  -9 -21   -0.89    1.11
  -1   9  21   -0.15    0.66
  -1   9  21    0.07    0.52
   1  -9 -21    0.07    0.52
   1  -9 -21   -0.22    0.52
  -1   9  20    0.74    1.26
  -1   9  20    2.73    1.03
   1  -9 -20   -0.37    1.18
   1  -9 -20    3.10    1.18
  -1   9  20    1.26    0.74
  -1   9  20    1.77    0.59
   1  -9 -20    0.81    0.66
  -1   9  19   41.13    2.29
  -1   9  19   36.19    2.73
   1  -9 -19   42.46    2.51
   1  -9 -19   42.68    2.73
  -1   9  19   45.71    1.85
  -1   9  19   45.71    2.14
   1  -9 -19   46.23    1.99
   1  -9 -19   42.98    1.85
   1  -9 -18   42.91    2.81
   1  -9 -18   38.92    2.44
  -1   9  18   39.73    1.99
  -1   9  18   42.76    1.85
   1  -9 -18   41.87    1.99
   1  -9 -18   40.32    1.85
  -1   9  17    4.80    1.55
  -1   9  17    5.54    0.96
  -1   9  16    4.06    1.03
  -1   9  16    1.70    1.18
   1  -9 -16    0.37    1.11
   1  -9 -16    3.25    1.26
  -1   9  16    3.84    0.89
  -1   9  16    3.91    0.74
   1  -9 -16    4.36    0.89
   1  -9 -16    4.21    0.81
  -1   9  15    3.62    0.96
  -1   9  15    3.84    1.26
   1  -9 -15    1.92    1.03
   1  -9 -15    4.28    1.11
   1  -9 -15    4.28    0.89
   1  -9 -15    3.99    0.74
  -1   9  14   83.37    3.10
  -1   9  14   79.24    3.54
  -1   9  14   79.68    2.73
  -1   9  14   78.80    2.51
   1  -9 -14   76.65    2.58
   1  -9 -14   80.94    2.51
  -1   9  13    1.03    0.74
  -1   9  13    0.66    1.18
   1  -9 -13    1.33    0.89
   1  -9 -13    2.29    0.89
  -1   9  13    0.74    0.74
  -1   9  13    1.40    0.66
   1  -9 -13    1.33    0.66
   1  -9 -13    0.81    0.59
  -1   9  12    2.22    0.74
  -1   9  12    1.92    1.18
   1  -9 -12    1.85    0.89
   1  -9 -12    0.96    0.81
  -1   9  12    1.99    0.74
  -1   9  12    1.48    0.66
   1  -9 -12    3.40    0.81
   1  -9 -12    2.44    0.66
  -1   9  11   18.98    1.33
  -1   9  11   20.46    1.85
   1  -9 -11   20.23    1.48
   1  -9 -11   19.42    1.48
  -1   9  11   19.57    1.26
  -1   9  11   19.13    1.33
   1  -9 -11   18.83    1.33
   1  -9 -11   18.39    1.18
  -1   9  10    0.44    0.59
  -1   9  10   -0.30    1.03
   1  -9 -10    0.15    0.74
   1  -9 -10    0.52    0.81
  -1   9  10    0.59    0.74
  -1   9  10    0.59    0.59
   1  -9 -10    0.66    0.59
   1  -9 -10    1.40    0.66
  -1   9   9   29.83    1.62
  -1   9   9   27.10    1.92
   1  -9  -9   28.65    1.62
   1  -9  -9   29.17    1.70
  -1   9   9   29.91    1.55
  -1   9   9   31.02    1.48
   1  -9  -9   29.32    1.48
   1  -9  -9   27.99    1.40
  -1   9   8  161.73    5.39
  -1   9   8  148.80    4.73
   1  -9  -8  150.50    4.87
   1  -9  -8  149.17    4.73
  -1   9   8  145.55    3.69
  -1   9   8  145.26    3.62
   1  -9  -8  142.82    3.54
   1  -9  -8  138.10    3.54
  -1   9   7   43.57    1.92
  -1   9   7   40.32    2.07
   1  -9  -7   37.44    1.77
   1  -9  -7   42.17    1.92
  -1   9   7   38.84    1.70
  -1   9   7   41.21    1.70
   1  -9  -7   41.06    1.70
   1  -9  -7   43.72    1.70
  -1   9   6   80.35    2.95
  -1   9   6   82.19    3.18
   1  -9  -6   88.47    3.10
   1  -9  -6   83.82    2.95
  -1   9   6   81.38    2.51
  -1   9   6   80.79    2.44
   1  -9  -6   80.72    2.36
   1  -9  -6   88.17    2.58
  -1   9   5   15.58    1.18
  -1   9   5   14.25    1.33
   1  -9  -5   14.25    1.11
   1  -9  -5   14.18    1.11
  -1   9   5   12.63    1.03
  -1   9   5   13.44    1.03
   1  -9  -5   13.59    0.96
   1  -9  -5   12.85    1.03
  -1   9   4    9.67    1.03
  -1   9   4   11.96    1.18
   1  -9  -4   14.25    1.03
   1  -9  -4   14.55    1.03
  -1   9   4    9.82    1.03
   1  -9  -4   13.14    1.03
  -1   9   3    2.81    0.81
  -1   9   3    2.14    0.81
   1  -9  -3    2.81    0.66
   1  -9  -3    3.03    0.66
  -1   9   2   22.45    1.40
  -1   9   2   23.19    1.40
   1  -9  -2   21.79    1.26
   1  -9  -2   23.71    1.26
  -1   9   2   20.83    1.18
  -1   9   2   18.68    1.18
   1  -9  -2   19.27    1.11
   1  -9  -2   20.83    1.18
  -1   9   1   14.10    1.18
  -1   9   1   12.41    1.03
   1  -9  -1   16.02    1.11
   1  -9  -1   15.51    1.03
  -1   9   1   13.07    1.03
  -1   9   1   13.96    1.03
   1  -9  -1   14.47    0.96
   1  -9  -1   15.51    0.96
  -1   9   0   42.46    1.99
  -1   9   0   37.51    1.70
   1  -9   0   38.40    1.77
   1  -9   0   39.73    1.70
  -1   9   0   38.33    1.55
  -1   9   0   37.00    1.48
   1  -9   0   41.58    1.55
   1  -9   0   39.95    1.55
  -1   9  -1   99.92    3.54
  -1   9  -1   98.07    3.32
   1  -9   1  101.91    3.47
   1  -9   1  101.10    3.32
  -1   9  -1  104.27    2.81
  -1   9  -1   99.84    2.66
  -1   9  -2    7.61    1.03
  -1   9  -2    8.27    0.89
   1  -9   2    8.20    1.03
   1  -9   2    8.64    0.81
  -1   9  -2    8.71    0.89
  -1   9  -2    8.20    0.81
  -1   9  -3   31.24    1.55
  -1   9  -3   31.24    1.92
   1  -9   3   31.09    1.70
   1  -9   3   30.87    1.55
  -1   9  -3   29.69    1.33
  -1   9  -3   32.27    1.40
  -1   9  -4    1.77    0.89
  -1   9  -4    2.07    0.66
   1  -9   4    2.29    0.59
   1  -9   4    2.22    0.74
  -1   9  -4    0.22    0.59
  -1   9  -4    1.92    0.66
   1  -9   4    1.11    0.52
   1  -9   4    0.81    0.52
  -1   9  -5   11.22    1.40
  -1   9  -5   11.52    1.03
   1  -9   5   13.74    1.26
   1  -9   5   11.22    0.96
  -1   9  -5   13.44    0.96
  -1   9  -5   11.30    0.96
   1  -9   5   11.15    0.89
   1  -9   5   12.04    0.81
  -1   9  -6    0.52    0.96
  -1   9  -6    0.37    0.59
   1  -9   6    1.40    0.81
   1  -9   6    1.11    0.59
  -1   9  -6    0.81    0.59
  -1   9  -6    1.55    0.66
   1  -9   6    0.59    0.52
   1  -9   6    0.74    0.52
  -1   9  -7   17.80    1.70
  -1   9  -7   19.50    1.33
   1  -9   7   19.42    1.33
   1  -9   7   20.01    1.55
  -1   9  -7   18.02    1.11
  -1   9  -7   18.09    1.03
   1  -9   8   19.05    1.33
   1  -9   8   20.01    1.55
  -1   9  -8   16.10    1.11
  -1   9  -8   16.69    1.03
   1  -9   8   16.10    0.96
   1  -9   8   16.32    0.96
  -1   9  -9    0.22    0.89
  -1   9  -9    0.81    0.66
   1  -9   9    0.59    0.89
   1  -9   9    1.03    0.66
  -1   9  -9    1.85    0.59
  -1   9  -9    1.11    0.59
   1  -9   9    0.96    0.52
   1  -9   9    0.07    0.52
  -1   9 -10   -0.07    0.66
  -1   9 -10   -0.15    0.96
   1  -9  10    0.44    0.81
   1  -9  10    0.59    0.59
  -1   9 -10    0.37    0.59
  -1   9 -10   -0.22    0.59
   1  -9  10    0.30    0.52
   1  -9  10    0.00    0.52
  -1   9 -11    4.50    0.89
  -1   9 -11    2.58    1.11
   1  -9  11    3.69    1.03
   1  -9  11    3.62    0.81
  -1   9 -11    2.58    0.66
  -1   9 -11    3.18    0.66
   1  -9  11    3.91    0.59
   1  -9  11    2.58    0.59
  -1   9 -12    4.06    0.89
  -1   9 -12    2.88    1.18
   1  -9  12    2.36    0.81
   1  -9  12    2.36    1.03
  -1   9 -12    3.40    0.59
  -1   9 -12    3.47    0.66
   1  -9  12    4.58    0.59
   1  -9  12    4.43    0.66
  -1   9 -13    8.42    1.33
   1  -9  13    9.82    1.48
  -1   9 -13   10.78    0.81
  -1   9 -13   11.74    0.96
   1  -9  13   10.78    0.81
   1  -9  13   12.26    0.81
  -1   9 -14    1.55    0.96
  -1   9 -14    1.55    1.11
   1  -9  14    2.36    0.96
   1  -9  14    2.07    1.18
  -1   9 -14    2.07    0.52
  -1   9 -14    3.18    0.66
   1  -9  14    1.03    0.44
   1  -9  14    1.55    0.59
  -1   9 -15   12.78    1.70
  -1   9 -15   10.63    1.62
   1  -9  15   12.78    1.40
   1  -9  15   15.06    1.92
  -1   9 -15   14.62    0.96
  -1   9 -15   13.22    0.89
   1  -9  15   13.81    0.89
   1  -9  15   15.66    0.89
  -1   9 -16   -0.15    1.03
  -1   9 -16    1.77    1.03
   1  -9  16   -0.44    1.33
   1  -9  16   -0.15    0.89
  -1   9 -16    0.89    0.44
  -1   9 -16    0.22    0.44
   1  -9  16    1.18    0.44
   1  -9  16    1.26    0.52
  -1   9 -17    4.14    1.40
  -1   9 -17    0.81    1.26
   1  -9  17    4.06    1.48
   1  -9  17    8.20    1.48
  -1   9 -17    6.72    0.66
  -1   9 -17    6.06    0.66
   1  -9  17    5.61    0.66
   1  -9  17    6.87    0.66
  -1   9 -18    0.59    1.18
  -1   9 -18    0.66    1.26
   1  -9  18    0.07    0.96
   1  -9  18    0.15    1.11
  -1   9 -18    0.37    0.52
  -1   8  23   -0.30    1.18
  -1   8  23    0.89    0.66
   1  -8 -23   -1.55    1.26
   1  -8 -23    1.55    1.03
  -1   8  23    0.81    0.52
  -1   8  23    0.07    0.59
   1  -8 -23   -0.07    0.52
   1  -8 -23   -0.22    0.52
  -1   8  22    1.55    0.89
   1  -8 -22    1.48    1.18
   1  -8 -22    1.55    1.18
  -1   8  22    0.07    0.66
  -1   8  22    1.26    0.59
   1  -8 -22    0.66    0.59
   1  -8 -22    1.03    0.59
  -1   8  21    2.51    1.03
  -1   8  21    0.66    1.03
   1  -8 -21    1.40    1.18
   1  -8 -21    2.73    1.11
  -1   8  21    1.40    0.59
  -1   8  21    2.51    0.74
   1  -8 -21    1.11    0.59
   1  -8 -21    1.26    0.59
  -1   8  20    3.91    1.11
  -1   8  20    3.84    1.33
   1  -8 -20    3.10    1.18
   1  -8 -20    3.54    1.33
  -1   8  20    4.80    0.89
  -1   8  20    3.40    0.74
   1  -8 -20    3.99    0.74
   1  -8 -20    3.25    0.74
  -1   8  19    7.24    1.18
  -1   8  19    4.58    1.26
   1  -8 -19    5.61    1.33
   1  -8 -19    3.25    1.11
  -1   8  19    4.65    0.89
  -1   8  19    4.87    0.81
   1  -8 -19    6.72    0.96
   1  -8 -19    4.21    0.81
  -1   8  18    0.15    1.03
  -1   8  18   -1.26    0.96
   1  -8 -18   -0.30    0.89
   1  -8 -18    1.70    1.18
  -1   8  18    0.89    0.66
   1  -8 -18   -0.66    0.74
   1  -8 -17   18.98    1.77
   1  -8 -17   15.36    1.62
  -1   8  17   16.84    1.26
  -1   8  17   14.70    1.33
   1  -8 -17   15.58    1.18
   1  -8 -17   13.88    1.26
  -1   8  16   42.24    2.22
  -1   8  16   42.68    2.58
   1  -8 -16   39.58    2.29
   1  -8 -16   36.70    2.29
  -1   8  16   41.80    1.77
  -1   8  16   42.02    1.92
   1  -8 -16   42.98    1.77
   1  -8 -16   39.36    1.85
  -1   8  15   42.76    2.51
  -1   8  15   39.95    2.07
   1  -8 -15   41.35    2.29
   1  -8 -15   38.77    2.22
  -1   8  15   41.21    1.92
  -1   8  15   37.15    1.62
   1  -8 -15   40.69    1.85
   1  -8 -15   39.43    1.70
  -1   8  14  190.90    6.42
  -1   8  14  180.04    5.69
   1  -8 -14  170.37    5.61
   1  -8 -14  192.74    6.20
  -1   8  14  183.44    4.43
  -1   8  14  181.30    4.58
   1  -8 -14  184.69    4.58
   1  -8 -14  188.39    4.50
  -1   8  13   81.90    3.03
  -1   8  13   85.00    3.54
   1  -8 -13   76.36    3.03
   1  -8 -13   78.72    3.18
  -1   8  13   87.21    2.81
  -1   8  13   84.19    2.58
   1  -8 -13   81.68    2.66
   1  -8 -13   86.11    2.58
  -1   8  12    0.96    1.03
  -1   8  12    0.44    0.66
   1  -8 -12    0.30    0.74
   1  -8 -12   -0.30    0.89
  -1   8  12    1.03    0.74
  -1   8  12    0.07    0.59
   1  -8 -12    0.37    0.59
   1  -8 -12   -0.30    0.59
  -1   8  11  131.82    4.28
  -1   8  11  139.20    4.87
   1  -8 -11  126.58    4.28
   1  -8 -11  136.84    4.50
  -1   8  11  122.96    3.25
  -1   8  11  122.14    3.40
   1  -8 -11  127.46    3.32
   1  -8 -11  122.59    3.32
  -1   8  10    1.99    0.66
  -1   8  10    2.66    1.11
   1  -8 -10    1.03    0.81
   1  -8 -10    1.55    0.81
  -1   8  10    0.30    0.66
  -1   8  10    2.07    0.59
   1  -8 -10    0.59    0.59
   1  -8 -10    1.92    0.74
  -1   8   9  301.08    9.01
  -1   8   9  293.55    8.49
   1  -8  -9  284.24    8.27
   1  -8  -9  295.17    8.64
  -1   8   9  280.03    6.13
  -1   8   9  285.13    6.13
   1  -8  -9  282.17    6.13
   1  -8  -9  286.23    6.06
  -1   8   8  234.10    7.16
  -1   8   8  225.53    6.65
   1  -8  -8  228.04    6.72
   1  -8  -8  217.48    6.50
  -1   8   8  225.24    5.02
  -1   8   8  225.61    5.10
   1  -8  -8  229.00    5.02
   1  -8  -8  219.55    5.02
  -1   8   7  214.75    6.57
  -1   8   7  203.60    6.06
   1  -8  -7  213.86    6.42
   1  -8  -7  226.79    6.65
  -1   8   7  225.01    5.02
  -1   8   7  218.59    4.95
   1  -8  -7  215.04    4.87
   1  -8  -7  226.05    4.95
  -1   8   6   61.07    2.51
   1  -8  -6   66.17    2.44
  -1   8   6   66.68    2.22
   1  -8  -6   67.05    2.07
  -1   8   4  108.78    2.88
  -1   8   4  113.28    2.95
   1  -8  -4  114.09    2.88
   1  -8  -4  113.28    2.95
  -1   8   3  182.92    5.54
   1  -8  -3  176.57    5.32
  -1   8   3  177.53    4.06
  -1   8   3  184.40    4.21
   1  -8  -3  177.97    3.99
   1  -8  -3  177.68    4.06
  -1   8   2  143.49    4.50
   1  -8  -2  154.34    4.65
  -1   8   2  144.82    3.40
  -1   8   2  147.10    3.54
   1  -8  -2  145.41    3.47
   1  -8  -2  151.46    3.47
  -1   8   1  235.13    6.94
   1  -8  -1  234.98    6.79
  -1   8   1  232.62    5.02
  -1   8   1  246.28    5.17
   1  -8  -1  239.34    5.10
   1  -8  -1  240.89    5.02
  -1   8   0    0.30    0.74
   1  -8   0   -0.52    0.52
  -1   8   0    0.22    0.59
  -1   8   0    0.89    0.59
   1  -8   0    0.44    0.52
   1  -8   0    0.96    0.59
  -1   8  -1    3.18    0.66
  -1   8  -1    3.18    0.66
   1  -8   1    3.62    0.66
   1  -8   1    2.66    0.59
  -1   8  -2  174.65    5.32
   1  -8   2  178.05    5.46
  -1   8  -2  180.26    3.99
  -1   8  -2  181.89    3.99
   1  -8   2  184.25    3.99
   1  -8   2  193.63    4.21
  -1   8  -3   27.99    1.40
  -1   8  -3   28.51    1.70
   1  -8   3   30.65    1.62
   1  -8   3   29.47    1.40
  -1   8  -3   27.32    1.26
  -1   8  -3   26.14    1.18
   1  -8   3   26.29    1.18
  -1   8  -4  261.64    7.61
  -1   8  -4  248.05    7.53
   1  -8   4  256.25    7.61
   1  -8   4  260.02    7.53
  -1   8  -4  260.83    5.39
  -1   8  -4  267.26    5.54
   1  -8   4  257.51    5.24
   1  -8   4  256.33    5.24
  -1   8  -5   19.50    1.26
  -1   8  -5   19.20    1.62
   1  -8   5   21.56    1.48
   1  -8   5   21.19    1.33
  -1   8  -5   22.08    1.11
  -1   8  -5   20.46    1.11
   1  -8   5   22.38    1.03
   1  -8   5   20.09    1.03
  -1   8  -6   10.93    0.96
  -1   8  -6   11.82    1.40
   1  -8   6   10.63    1.11
   1  -8   6   10.56    0.96
  -1   8  -6    9.90    0.89
  -1   8  -6    9.08    0.81
   1  -8   6   10.56    0.74
   1  -8   6    8.34    0.74
  -1   8  -7   82.34    3.03
  -1   8  -7   82.41    3.40
   1  -8   7   80.94    3.18
   1  -8   7   80.86    2.95
  -1   8  -7   81.23    2.29
  -1   8  -7   81.90    2.22
   1  -8   7   80.05    2.14
   1  -8   7   80.35    2.14
  -1   8  -8  187.06    6.20
  -1   8  -8  176.20    5.46
   1  -8   8  172.07    5.39
   1  -8   8  175.98    5.69
  -1   8  -8  184.32    3.99
  -1   8  -8  179.01    3.99
   1  -8   8  181.74    3.91
   1  -8   8  186.02    3.99
  -1   8  -9   10.41    1.03
  -1   8  -9    9.60    1.33
   1  -8   9   11.15    1.03
   1  -8   9    8.49    1.11
  -1   8  -9    9.16    0.81
  -1   8  -9    8.86    0.81
   1  -8   9   10.34    0.81
   1  -8   9   10.19    0.81
  -1   8 -10    2.73    0.74
  -1   8 -10    1.33    0.96
   1  -8  10    2.66    0.74
   1  -8  10    2.36    0.96
  -1   8 -10    1.48    0.59
  -1   8 -10    2.51    0.59
   1  -8  10    2.73    0.52
   1  -8  10    1.70    0.52
  -1   8 -11   -1.03    0.89
  -1   8 -11   -0.66    0.59
   1  -8  11    0.37    0.89
   1  -8  11    0.81    0.66
  -1   8 -11   -0.66    0.52
  -1   8 -11   -0.15    0.52
   1  -8  11   -0.37    0.52
   1  -8  11    0.59    0.44
  -1   8 -12   34.71    2.29
  -1   8 -12   36.48    1.92
   1  -8  12   38.99    1.99
   1  -8  12   36.41    2.22
  -1   8 -12   36.33    1.48
  -1   8 -12   37.96    1.40
   1  -8  12   37.66    1.40
   1  -8  12   38.11    1.40
  -1   8 -13    9.23    1.40
  -1   8 -13    6.57    1.03
   1  -8  13    7.83    1.40
   1  -8  13    8.12    1.11
  -1   8 -13    7.46    0.81
  -1   8 -13    7.24    0.74
   1  -8  13    5.76    0.66
   1  -8  13    7.46    0.74
  -1   8 -14   -0.37    0.89
   1  -8  14    0.15    0.89
  -1   8 -14    0.44    0.44
  -1   8 -14    1.18    0.59
   1  -8  14    1.48    0.59
   1  -8  14    0.96    0.52
  -1   8 -15    0.44    0.89
  -1   8 -15    2.14    1.11
   1  -8  15    0.96    0.81
   1  -8  15    1.92    1.18
  -1   8 -15    1.03    0.52
  -1   8 -15    0.66    0.59
   1  -8  15    1.48    0.44
   1  -8  15    1.03    0.52
  -1   8 -16   -0.66    0.96
  -1   8 -16   -0.07    0.96
   1  -8  16    1.40    0.89
   1  -8  16    0.89    1.26
  -1   8 -16    0.22    0.52
  -1   8 -16    0.00    0.44
   1  -8  16    0.89    0.44
   1  -8  16   -0.07    0.44
  -1   8 -17    0.81    1.11
  -1   8 -17   -0.22    0.96
   1  -8  17   -1.26    0.89
   1  -8  17    1.92    1.33
  -1   8 -17    0.44    0.37
  -1   8 -17    0.44    0.52
   1  -8  17    0.00    0.44
   1  -8  17    0.30    0.44
  -1   8 -18    1.99    1.18
  -1   8 -18    0.52    1.18
   1  -8  18    1.77    1.33
   1  -8  18    3.10    1.26
  -1   8 -18    1.62    0.52
  -1   8 -18    1.92    0.44
   1  -8  18    2.81    0.59
   1  -8  18    2.22    0.52
  -1   8 -19   -1.03    1.03
  -1   8 -19   -0.74    1.18
   1  -8  19    0.59    1.03
   1  -8  19    0.22    0.74
  -1   8 -19    0.22    0.52
  -1   7  23    0.44    0.59
  -1   7  23   -2.22    1.11
   1  -7 -23    0.07    1.03
   1  -7 -23    0.52    1.18
  -1   7  23   -0.59    0.66
  -1   7  23   -0.30    0.59
   1  -7 -23    0.89    0.52
   1  -7 -23    0.96    0.59
  -1   7  22    9.08    1.48
  -1   7  22    8.27    1.03
  -1   7  22    7.83    0.89
   1  -7 -22    8.57    0.89
   1  -7 -22    8.86    0.89
  -1   7  21   -0.22    0.89
  -1   7  21   -1.03    1.03
   1  -7 -21    0.52    1.18
   1  -7 -21    1.70    0.96
  -1   7  21    1.55    0.74
  -1   7  21   -0.37    0.52
   1  -7 -21    0.30    0.52
   1  -7 -21    0.00    0.59
  -1   7  20    3.69    1.26
  -1   7  20    3.40    1.18
   1  -7 -20    4.14    1.11
   1  -7 -20    1.18    1.18
  -1   7  20    3.18    0.74
  -1   7  20    3.77    0.89
   1  -7 -20    2.36    0.81
   1  -7 -20    3.03    0.74
  -1   7  19   34.12    2.14
  -1   7  19   39.21    2.51
   1  -7 -19   33.90    2.22
   1  -7 -19   31.75    2.07
  -1   7  19   35.15    1.70
  -1   7  18   -0.22    0.52
  -1   7  18   -0.30    0.66
   1  -7 -18   -0.52    0.52
   1  -7 -18   -0.15    0.66
  -1   7  17   81.45    3.54
  -1   7  17   85.15    3.32
   1  -7 -17   84.48    3.47
   1  -7 -17   90.24    3.54
  -1   7  17   86.03    2.73
   1  -7 -17   82.27    2.58
   1  -7 -17   82.86    2.73
  -1   7  16    7.02    1.26
  -1   7  16    9.08    1.26
   1  -7 -16    9.38    1.40
   1  -7 -16   11.00    1.26
  -1   7  16    8.94    0.96
  -1   7  16    9.60    1.11
   1  -7 -16    7.90    0.96
   1  -7 -16    9.38    1.03
  -1   7  15   32.12    2.14
  -1   7  15   31.83    1.85
   1  -7 -15   30.72    1.99
   1  -7 -15   28.87    1.85
  -1   7  15   31.68    1.70
  -1   7  15   33.16    1.55
   1  -7 -15   32.79    1.70
   1  -7 -15   30.50    1.48
  -1   7  14    3.25    1.11
  -1   7  14    2.51    0.89
   1  -7 -14    3.40    1.11
   1  -7 -14    3.62    0.89
  -1   7  14    3.25    0.74
  -1   7  14    3.25    0.81
   1  -7 -14    3.62    0.74
   1  -7 -14    3.32    0.81
  -1   7  13   11.08    1.40
  -1   7  13   12.63    1.18
   1  -7 -13   13.44    1.40
   1  -7 -13   10.78    1.11
  -1   7  13   11.96    1.03
  -1   7  13   13.59    1.18
   1  -7 -13   13.66    1.03
   1  -7 -13   13.14    1.18
  -1   7  12   54.28    2.58
  -1   7  12   52.06    2.22
   1  -7 -12   54.87    2.44
   1  -7 -12   51.77    2.22
   1  -7 -12   52.43    1.99
   1  -7 -12   54.20    1.92
  -1   7  11   21.86    1.33
  -1   7  11   18.09    1.62
   1  -7 -11   20.68    1.48
   1  -7 -11   19.79    1.40
  -1   7  11   22.15    1.26
  -1   7  11   18.83    1.26
   1  -7 -11   21.79    1.33
   1  -7 -11   18.02    1.11
   1  -7 -10   19.57    1.48
   1  -7 -10   21.19    1.40
  -1   7  10   22.15    1.33
  -1   7  10   22.45    1.26
   1  -7 -10   19.72    1.26
   1  -7 -10   23.41    1.26
  -1   7   9   39.43    2.07
  -1   7   9   35.82    1.70
   1  -7  -9   38.03    1.77
   1  -7  -9   41.13    1.92
  -1   7   9   40.17    1.70
  -1   7   9   37.00    1.55
   1  -7  -9   40.10    1.55
   1  -7  -9   36.04    1.55
  -1   7   8   27.84    1.77
   1  -7  -8   26.44    1.48
  -1   7   8   26.22    1.33
  -1   7   8   25.85    1.33
   1  -7  -8   27.10    1.40
   1  -7  -8   28.43    1.33
  -1   7   6   -0.30    0.59
  -1   7   6    1.03    0.96
   1  -7  -6   -0.59    0.66
   1  -7  -6   -0.15    0.66
  -1   7   6   -0.44    0.59
  -1   7   6   -0.22    0.59
   1  -7  -6   -1.03    0.66
   1  -7  -6   -0.44    0.52
  -1   7   5   24.37    1.33
  -1   7   5   24.15    1.55
   1  -7  -5   26.36    1.40
   1  -7  -5   28.73    1.40
  -1   7   5   28.21    1.33
  -1   7   5   24.15    1.26
   1  -7  -5   26.14    1.18
   1  -7  -5   26.73    1.33
  -1   7   4   -0.44    0.74
  -1   7   4    0.66    0.59
   1  -7  -4    0.74    0.59
   1  -7  -4    0.37    0.59
  -1   7   4   -0.07    0.59
  -1   7   4    0.37    0.66
   1  -7  -4    0.52    0.59
   1  -7  -4    0.15    0.59
  -1   7   3  423.96   11.74
  -1   7   3  442.20   12.26
   1  -7  -3  434.67   11.96
   1  -7  -3  430.02   11.82
  -1   7   3  418.64    8.27
  -1   7   3  433.86    8.49
   1  -7  -3  425.51    8.27
   1  -7  -3  434.67    8.49
  -1   7   2  252.49    7.31
  -1   7   2  258.69    7.46
   1  -7  -2  250.94    7.16
   1  -7  -2  259.28    7.38
  -1   7   2  254.85    5.32
  -1   7   2  262.97    5.46
   1  -7  -2  249.46    5.24
   1  -7  -2  257.88    5.32
  -1   7   1   13.07    0.96
  -1   7   1   14.77    1.11
   1  -7  -1   13.51    0.96
   1  -7  -1   12.78    0.89
  -1   7   1   11.74    0.89
  -1   7   1   13.44    0.96
   1  -7  -1   13.07    0.89
   1  -7  -1   12.63    0.89
  -1   7   0  270.21    7.83
  -1   7   0  264.01    7.53
   1  -7   0  264.38    7.53
   1  -7   0  261.86    7.46
  -1   7   0  256.10    5.24
  -1   7   0  254.41    5.24
   1  -7   0  261.64    5.32
   1  -7   0  256.10    5.24
  -1   7  -1  124.95    4.06
  -1   7  -1  124.73    3.91
   1  -7   1  128.57    4.06
   1  -7   1  129.97    3.99
  -1   7  -1  130.86    3.03
  -1   7  -1  128.35    3.03
   1  -7   1  126.94    2.95
   1  -7   1  132.19    3.03
  -1   7  -2  204.63    5.98
  -1   7  -2  200.87    6.13
   1  -7   2  210.61    6.13
   1  -7   2  199.32    5.98
  -1   7  -2  210.91    4.43
  -1   7  -2  204.71    4.36
   1  -7   2  207.44    4.28
   1  -7   2  200.28    4.21
  -1   7  -3  413.55   11.74
  -1   7  -3  417.39   11.74
   1  -7   3  408.97   11.30
  -1   7  -3  409.04    7.90
  -1   7  -3  404.69    7.83
   1  -7   3  418.42    8.05
   1  -7   3  389.92    7.53
  -1   7  -4   19.87    1.03
  -1   7  -4   21.49    1.03
   1  -7   4   20.23    0.96
   1  -7   4   18.83    0.96
  -1   7  -5  106.71    3.47
  -1   7  -5  107.52    3.91
   1  -7   5  112.03    3.84
   1  -7   5  110.33    3.62
  -1   7  -5  111.66    2.66
  -1   7  -5  111.88    2.73
   1  -7   5  111.73    2.58
   1  -7   5  114.17    2.66
  -1   7  -6   69.79    2.95
  -1   7  -6   69.86    2.58
  -1   7  -6   71.85    1.92
  -1   7  -6   72.81    2.07
   1  -7   6   72.00    1.92
   1  -7   6   70.60    1.85
  -1   7  -7   46.01    2.36
  -1   7  -7   48.37    1.99
   1  -7   7   45.19    1.99
   1  -7   7   44.90    2.14
  -1   7  -7   46.23    1.48
  -1   7  -7   42.68    1.70
   1  -7   7   47.26    1.48
   1  -7   7   47.93    1.48
  -1   7  -8   27.40    1.85
  -1   7  -8   32.86    1.62
   1  -7   8   27.47    1.70
   1  -7   8   29.76    1.55
  -1   7  -8   30.28    1.18
  -1   7  -8   30.65    1.26
   1  -7   8   33.38    1.26
   1  -7   8   29.98    1.18
  -1   7  -9   49.03    2.07
  -1   7  -9   46.08    2.44
   1  -7   9   49.11    2.44
   1  -7   9   46.01    2.07
  -1   7  -9   49.85    1.55
  -1   7  -9   49.85    1.70
   1  -7   9   48.96    1.48
   1  -7   9   52.88    1.62
  -1   7 -10    4.87    0.81
  -1   7 -10    3.62    1.03
   1  -7  10    3.47    0.74
   1  -7  10    5.46    1.03
  -1   7 -10    5.10    0.66
  -1   7 -10    5.24    0.74
   1  -7  10    5.17    0.59
   1  -7  10    5.98    0.66
  -1   7 -11    3.91    1.11
  -1   7 -11    6.28    0.89
   1  -7  11    4.80    0.81
   1  -7  11    4.95    1.03
  -1   7 -11    6.79    0.74
  -1   7 -11    5.39    0.74
   1  -7  11    6.72    0.66
   1  -7  11    5.98    0.66
  -1   7 -12  113.80    4.36
  -1   7 -12  106.64    3.77
   1  -7  12  101.84    3.62
   1  -7  12  103.68    3.99
  -1   7 -12  103.46    2.66
  -1   7 -12  101.10    2.66
   1  -7  12  102.57    2.58
   1  -7  12  104.35    2.58
  -1   7 -13   30.57    2.14
  -1   7 -13   33.67    1.85
   1  -7  13   31.90    2.07
   1  -7  13   33.45    1.85
  -1   7 -13   32.35    1.33
  -1   7 -13   33.38    1.48
   1  -7  13   33.90    1.33
   1  -7  13   33.53    1.33
  -1   7 -14   -0.07    0.74
  -1   7 -14    1.03    0.96
   1  -7  14    0.66    0.96
   1  -7  14    0.30    0.74
  -1   7 -14    0.15    0.52
  -1   7 -14    0.00    0.44
   1  -7  14    0.30    0.44
   1  -7  14    0.00    0.52
  -1   7 -15    0.81    0.81
  -1   7 -15    3.32    1.33
   1  -7  15    1.55    1.03
  -1   7 -15    2.51    0.52
  -1   7 -15    0.89    0.59
   1  -7  15    1.85    0.59
   1  -7  15    1.92    0.52
  -1   7 -16    0.07    0.89
  -1   7 -16   -0.59    1.03
   1  -7  16    1.11    0.81
   1  -7  16    0.81    1.03
  -1   7 -16   -0.44    0.44
  -1   7 -16    0.15    0.44
   1  -7  16    0.52    0.52
   1  -7  16   -0.15    0.44
  -1   7 -17   -0.07    1.11
  -1   7 -17    0.59    0.96
   1  -7  17    0.37    0.81
   1  -7  17    0.52    1.26
  -1   7 -17    0.66    0.52
  -1   7 -17    0.00    0.44
   1  -7  17    0.30    0.44
   1  -7  17    0.30    0.52
  -1   7 -18   -0.59    1.18
  -1   7 -18    0.74    1.03
   1  -7  18    1.03    1.03
   1  -7  18   -0.59    1.11
   1  -7  18    1.62    0.59
  -1   7 -19   -0.52    1.26
  -1   7 -19    2.14    1.26
   1  -7  19    2.07    1.18
   1  -7  19    1.48    1.18
   1  -7  19    1.11    0.59
  -1   7 -20    0.81    1.03
  -1   7 -20    0.30    1.11
   1  -7  20    0.52    0.74
  -1   7 -20    0.15    0.37
  -1   7 -20    0.00    0.52
  -1   6  23    3.77    1.26
  -1   6  23    0.66    0.52
   1  -6 -23    4.21    1.40
   1  -6 -23    1.62    1.26
  -1   6  23    3.62    0.74
  -1   6  23    4.65    0.74
   1  -6 -23    4.14    0.81
   1  -6 -23    5.24    0.81
  -1   6  22    1.99    1.03
   1  -6 -22    0.81    1.03
   1  -6 -22   -0.59    1.18
  -1   6  22    0.74    0.74
  -1   6  22    0.59    0.59
   1  -6 -22    0.44    0.59
   1  -6 -22    0.66    0.52
  -1   6  21    0.37    0.96
  -1   6  21    0.66    0.74
   1  -6 -21   -0.22    0.96
   1  -6 -21    1.77    1.11
  -1   6  21    0.96    0.66
  -1   6  21    0.74    0.66
   1  -6 -21    1.55    0.66
   1  -6 -21    1.11    0.59
  -1   6  20   12.04    1.40
  -1   6  20    8.20    1.40
   1  -6 -20   12.26    1.48
   1  -6 -20   12.55    1.48
  -1   6  20   11.74    1.11
  -1   6  19    1.55    1.03
  -1   6  19    0.66    0.89
   1  -6 -19    0.37    0.81
   1  -6 -19    1.03    1.18
  -1   6  19    0.96    0.66
  -1   6  19    0.96    0.59
   1  -6 -19    0.44    0.59
   1  -6 -19    0.37    0.59
  -1   6  18   10.19    1.33
   1  -6 -18    7.68    1.40
   1  -6 -18    9.01    1.18
  -1   6  18    7.83    1.03
  -1   6  18    9.08    0.96
  -1   6  17   12.85    1.40
  -1   6  17   11.67    1.33
   1  -6 -17   10.34    1.11
   1  -6 -17   11.74    1.62
  -1   6  17   10.78    1.11
  -1   6  17    9.08    0.96
   1  -6 -17    8.86    0.96
   1  -6 -17   10.04    1.03
  -1   6  16  107.82    3.84
  -1   6  16  108.11    4.14
   1  -6 -16  110.85    3.91
   1  -6 -16  114.69    4.21
  -1   6  16  100.21    3.18
   1  -6 -16  109.89    3.18
   1  -6 -16  105.53    2.95
  -1   6  15    9.67    1.18
  -1   6  15    7.68    1.18
   1  -6 -15   10.56    1.11
   1  -6 -15    7.90    1.33
  -1   6  15    8.71    0.89
  -1   6  15   10.71    1.03
   1  -6 -15    9.16    1.03
   1  -6 -15    9.16    0.89
  -1   6  14    0.00    0.81
  -1   6  14   -0.22    0.81
   1  -6 -14    1.85    0.74
   1  -6 -14   -0.52    0.96
  -1   6  14    0.96    0.59
  -1   6  14    0.37    0.66
   1  -6 -14    0.37    0.59
   1  -6 -14    1.48    0.74
  -1   6  13   15.73    1.26
  -1   6  13   15.06    1.48
   1  -6 -13   13.59    1.18
   1  -6 -13   16.47    1.48
  -1   6  13   13.37    1.03
  -1   6  13   14.99    1.18
   1  -6 -13   16.25    1.18
   1  -6 -13   14.77    1.03
  -1   6  12    0.44    0.74
  -1   6  12    0.07    0.81
   1  -6 -12    0.30    0.59
   1  -6 -12    1.03    0.89
  -1   6  12    0.30    0.66
  -1   6  12    0.30    0.52
   1  -6 -12    0.00    0.59
   1  -6 -12    0.15    0.66
  -1   6  11  138.98    4.43
  -1   6  11  138.69    4.73
   1  -6 -11  128.20    4.21
   1  -6 -11  133.07    4.43
  -1   6  11  136.10    3.54
  -1   6  11  133.44    3.32
   1  -6 -11  132.11    3.32
   1  -6 -11  136.99    3.54
  -1   6  10   16.10    1.18
  -1   6  10   15.73    1.48
   1  -6 -10   17.43    1.26
   1  -6 -10   16.32    1.33
  -1   6  10   16.62    1.18
  -1   6  10   14.70    1.03
   1  -6 -10   16.25    1.03
   1  -6 -10   13.74    1.11
  -1   6   9  279.66    8.34
  -1   6   9  280.33    5.98
   1  -6  -9  280.03    5.91
  -1   6   8    1.18    0.66
   1  -6  -8    2.66    0.89
   1  -6  -8    0.96    0.81
  -1   6   8    2.07    0.66
   1  -6  -8    0.37    0.74
  -1   6   7    6.57    0.81
  -1   6   7    5.39    1.11
   1  -6  -7    7.46    0.89
   1  -6  -7    6.57    0.96
  -1   6   7    6.28    0.81
  -1   6   7    5.98    0.81
   1  -6  -7    7.31    0.81
   1  -6  -7    5.10    0.81
  -1   6   6   52.95    1.99
  -1   6   6   49.18    2.14
   1  -6  -6   52.65    1.99
   1  -6  -6   52.73    2.07
  -1   6   6   53.39    1.77
  -1   6   6   52.65    1.77
   1  -6  -6   49.85    1.77
   1  -6  -6   51.32    1.70
  -1   6   5    8.64    0.81
  -1   6   5    8.57    1.03
   1  -6  -5    9.38    0.81
   1  -6  -5    9.30    0.89
  -1   6   5    7.98    0.81
  -1   6   5    7.38    0.81
   1  -6  -5    7.61    0.74
   1  -6  -5    7.75    0.89
  -1   6   4   16.99    1.03
  -1   6   4   16.54    1.18
   1  -6  -4   18.02    1.03
   1  -6  -4   18.17    1.03
  -1   6   4   16.69    1.03
  -1   6   4   16.47    0.96
   1  -6  -4   15.43    1.03
   1  -6  -4   16.10    0.96
  -1   6   3   25.99    1.33
  -1   6   3   24.22    1.26
   1  -6  -3   26.59    1.26
   1  -6  -3   28.58    1.26
  -1   6   3   25.70    1.18
  -1   6   3   25.85    1.26
   1  -6  -3   27.84    1.26
   1  -6  -3   29.61    1.18
  -1   6   2   33.67    1.48
  -1   6   2   32.49    1.48
   1  -6  -2   34.41    1.48
   1  -6  -2   35.52    1.48
  -1   6   2   35.00    1.33
  -1   6   2   36.70    1.33
   1  -6  -2   35.37    1.33
   1  -6  -2   34.34    1.26
  -1   6   1   58.71    2.22
  -1   6   1   55.24    1.99
   1  -6  -1   59.45    2.14
   1  -6  -1   56.64    1.99
  -1   6   1   55.02    1.70
  -1   6   1   56.79    1.77
   1  -6  -1   59.37    1.77
   1  -6  -1   56.20    1.70
  -1   6   0  246.13    7.02
  -1   6   0  236.61    6.87
   1  -6   0  236.90    6.72
   1  -6   0  234.54    6.72
  -1   6   0  230.70    4.80
  -1   6   0  240.89    4.95
   1  -6   0  245.40    5.02
   1  -6   0  242.22    4.87
  -1   6  -1  214.31    6.35
  -1   6  -1  216.89    6.20
   1  -6   1  223.98    6.35
   1  -6   1  220.66    6.42
  -1   6  -1  206.33    4.28
  -1   6  -1  212.02    4.43
   1  -6   1  215.04    4.43
   1  -6   1  207.81    4.28
  -1   6  -2    9.23    1.03
  -1   6  -2   11.45    0.89
   1  -6   2   11.59    0.96
   1  -6   2   12.11    0.89
  -1   6  -2   10.71    0.81
  -1   6  -2   12.04    0.81
   1  -6   2   11.89    0.74
   1  -6   2   12.18    0.81
  -1   6  -3    0.15    0.74
  -1   6  -3    0.22    0.52
   1  -6   3    0.07    0.52
   1  -6   3    0.59    0.66
  -1   6  -3    0.66    0.52
  -1   6  -3    0.96    0.52
   1  -6   3    1.11    0.44
   1  -6   3    0.44    0.52
  -1   6  -4  184.99    5.76
  -1   6  -4  194.00    5.69
   1  -6   4  198.43    5.83
   1  -6   4  199.61    6.06
  -1   6  -4  189.72    3.99
  -1   6  -4  190.68    3.99
   1  -6   4  194.22    3.99
   1  -6   4  182.63    3.77
  -1   6  -5   20.60    1.48
   1  -6   5   24.22    1.26
  -1   6  -5   23.34    1.03
  -1   6  -5   22.01    1.03
   1  -6   5   22.60    0.96
   1  -6   5   22.01    0.96
   1  -6   6  110.33    3.99
  -1   6  -6  115.20    2.73
  -1   6  -6  111.58    2.58
   1  -6   6  108.19    2.51
   1  -6   6  109.00    2.51
  -1   6  -7   34.19    1.92
  -1   6  -7   36.41    1.62
   1  -6   7   34.19    1.85
   1  -6   7   34.12    1.62
  -1   6  -7   33.38    1.26
  -1   6  -7   34.12    1.18
   1  -6   7   33.90    1.18
   1  -6   7   35.37    1.18
  -1   6  -8   16.99    1.48
  -1   6  -8   17.50    1.18
   1  -6   8   20.09    1.26
   1  -6   8   16.47    1.33
   1  -6   8   18.17    0.89
   1  -6   8   18.98    0.89
  -1   6  -9   79.02    3.25
  -1   6  -9   86.85    3.03
   1  -6   9   85.07    3.03
[truncated: 3,723,074 more chars]
