# Supplementary material for: Investigating the Conformations of a Family of [M2L3]4+ Helicates Using Single Crystal X-ray Diffraction
Source: Molecules. 2023 Feb 1;28(3):1404. doi: 10.3390/molecules28031404 (PMC9921459; doi:10.3390/molecules28031404)
Supplement: Supplementary file 1 [file molecules-28-01404-s001.zip › Final cifs/2224286.cif]

####################################################################### 
# 
# This file contains crystal structure data downloaded from the 
# Cambridge Structural Database (CSD) hosted by the Cambridge 
# Crystallographic Data Centre (CCDC).
# 
# Full information about CCDC data access policies and citation 
# guidelines are available at http://www.ccdc.cam.ac.uk/access/V1 
# 
# Audit and citation data items may have been added by the CCDC. 
# Please retain this information to preserve the provenance of 
# this file and to allow appropriate attribution of the data. 
# 
#######################################################################
data_cut83_a
_audit_creation_date               2022-12-05
_audit_creation_method
;
Olex2 1.5
(compiled 2022.04.07 svn.rca3783a0 for OlexSys, GUI svn.r6498)
;
_shelx_SHELXL_version_number       2018/3
loop_
  _audit_author_name
  _audit_author_address
 'Matthew Wallis'
;
Western Sydney University
Australia
;

_audit_contact_author_address      ?
_audit_contact_author_email        ?
_audit_contact_author_name         ''
_audit_contact_author_phone        ?
_audit_update_record
;
2022-12-05 deposited with the CCDC.	2022-12-05 downloaded from the CCDC.
;
_publ_contact_author_id_orcid      ?
_publ_section_references
;
Dolomanov, O.V., Bourhis, L.J., Gildea, R.J, Howard, J.A.K. & Puschmann, H.
 (2009), J. Appl. Cryst. 42, 339-341.

Sheldrick, G.M. (2015). Acta Cryst. C71, 3-8.
;
_chemical_name_common              ?
_chemical_name_systematic          ?
_chemical_formula_moiety          
 'C90 H66 Co2 N24 O3, 4(B F4), 3(C2 H3 N), 1.333(C4 O), 0.5(C2 N)'
_chemical_formula_sum              'C102.34 H75 B4 Co2 F16 N27.50 O4.34'
_chemical_formula_weight           2224.37
_chemical_melting_point            ?
# end Validation Reply Form
_chemical_properties_physical      Efflorescent
loop_
  _atom_type_symbol
  _atom_type_description
  _atom_type_scat_dispersion_real
  _atom_type_scat_dispersion_imag
  _atom_type_scat_source
 C C 0.0033 0.0016 'International Tables Vol C Tables 4.2.6.8 and 6.1.1.4'
 H H 0.0000 0.0000 'International Tables Vol C Tables 4.2.6.8 and 6.1.1.4'
 B B 0.0013 0.0007 'International Tables Vol C Tables 4.2.6.8 and 6.1.1.4'
 Co Co 0.3494 0.9721 'International Tables Vol C Tables 4.2.6.8 and 6.1.1.4'
 F F 0.0171 0.0103 'International Tables Vol C Tables 4.2.6.8 and 6.1.1.4'
 N N 0.0061 0.0033 'International Tables Vol C Tables 4.2.6.8 and 6.1.1.4'
 O O 0.0106 0.0060 'International Tables Vol C Tables 4.2.6.8 and 6.1.1.4'

_shelx_space_group_comment
;
The symmetry employed for this shelxl refinement is uniquely defined
by the following loop, which should always be used as a source of
symmetry information in preference to the above space-group names.
They are only intended as comments.
;
_space_group_crystal_system        'triclinic'
_space_group_IT_number             2
_space_group_name_H-M_alt          'P -1'
_space_group_name_Hall             '-P 1'
loop_
  _space_group_symop_operation_xyz
 'x, y, z'
 '-x, -y, -z'

_cell_length_a                     16.060(3)
_cell_length_b                     17.710(4)
_cell_length_c                     20.570(4)
_cell_angle_alpha                  80.35(3)
_cell_angle_beta                   89.76(3)
_cell_angle_gamma                  72.80(3)
_cell_volume                       5503(2)
_cell_formula_units_Z              2
_cell_measurement_reflns_used      3322
_cell_measurement_temperature      100
_cell_measurement_theta_max        20.00
_cell_measurement_theta_min        2.40
_shelx_estimated_absorpt_T_max     0.992
_shelx_estimated_absorpt_T_min     0.892
_exptl_absorpt_coefficient_mu      0.392
_exptl_absorpt_correction_T_max    ?
_exptl_absorpt_correction_T_min    ?
_exptl_absorpt_correction_type     none
_exptl_absorpt_process_details     ?
_exptl_absorpt_special_details     ?
_exptl_crystal_colour              'clear orange'
_exptl_crystal_colour_lustre       clear
_exptl_crystal_colour_primary      orange
_exptl_crystal_density_diffrn      1.342
_exptl_crystal_density_meas        ?
_exptl_crystal_density_method      ?
_exptl_crystal_description         plate
_exptl_crystal_F_000               2268
_exptl_crystal_recrystallization_method 
 'Vapour fiddusion of diethyl ether into acetonitrile'
_exptl_crystal_size_max            0.3
_exptl_crystal_size_mid            0.2
_exptl_crystal_size_min            0.02
_exptl_transmission_factor_max     ?
_exptl_transmission_factor_min     ?
_diffrn_reflns_av_R_equivalents    0.0328
_diffrn_reflns_av_unetI/netI       0.0205
_diffrn_reflns_Laue_measured_fraction_full  0.980
_diffrn_reflns_Laue_measured_fraction_max  0.977
_diffrn_reflns_limit_h_max         19
_diffrn_reflns_limit_h_min         -19
_diffrn_reflns_limit_k_max         21
_diffrn_reflns_limit_k_min         -21
_diffrn_reflns_limit_l_max         24
_diffrn_reflns_limit_l_min         -24
_diffrn_reflns_number              123589
_diffrn_reflns_point_group_measured_fraction_full  0.980
_diffrn_reflns_point_group_measured_fraction_max  0.977
_diffrn_reflns_theta_full          25.242
_diffrn_reflns_theta_max           25.350
_diffrn_reflns_theta_min           1.005
_diffrn_ambient_temperature        100.00
_diffrn_detector_area_resol_mean   ?
_diffrn_measured_fraction_theta_full  0.980
_diffrn_measured_fraction_theta_max  0.977
_diffrn_measurement_device_type    'Australian Synchrotron MX1'
_diffrn_measurement_method         '\w scans'
_diffrn_radiation_type             MoK\a
_diffrn_radiation_wavelength       0.71073
_diffrn_source                     ?
_reflns_Friedel_coverage           0.000
_reflns_Friedel_fraction_full      .
_reflns_Friedel_fraction_max       .
_reflns_number_gt                  15394
_reflns_number_total               19708
_reflns_special_details
;
 Reflections were merged by SHELXL according to the crystal
 class for the calculation of statistics and refinement.
 
 Structure factors included contributions from the .fab file.
 
 _reflns_Friedel_fraction is defined as the number of unique
 Friedel pairs measured divided by the number that would be
 possible theoretically, ignoring centric projections and
 systematic absences.
;
_reflns_threshold_expression       'I > 2\s(I)'
_computing_cell_refinement         ?
_computing_data_collection         ?
_computing_data_reduction          ?
_computing_molecular_graphics      'Olex2 1.5 (Dolomanov et al., 2009)'
_computing_publication_material    'Olex2 1.5 (Dolomanov et al., 2009)'
_computing_structure_refinement    'SHELXL 2018/3 (Sheldrick, 2015)'
_computing_structure_solution      'SHELXT 2018/2 (Sheldrick, 2018)'
_refine_diff_density_max           1.174
_refine_diff_density_min           -0.803
_refine_diff_density_rms           0.081
_refine_ls_extinction_coef         .
_refine_ls_extinction_method       none
_refine_ls_goodness_of_fit_ref     1.044
_refine_ls_hydrogen_treatment      constr
_refine_ls_matrix_type             full
_refine_ls_number_parameters       1727
_refine_ls_number_reflns           19708
_refine_ls_number_restraints       1021
_refine_ls_R_factor_all            0.1052
_refine_ls_R_factor_gt             0.0914
_refine_ls_restrained_S_all        1.038
_refine_ls_shift/su_max            0.002
_refine_ls_shift/su_mean           0.000
_refine_ls_structure_factor_coef   Fsqd
_refine_ls_weighting_details      
 'w=1/[\s^2^(Fo^2^)+(0.1860P)^2^+4.4971P] where P=(Fo^2^+2Fc^2^)/3'
_refine_ls_weighting_scheme        calc
_refine_ls_wR_factor_gt            0.2741
_refine_ls_wR_factor_ref           0.2925
_refine_special_details            SQUEEZE
_olex2_refinement_description
;
1. Others
 Fixed Sof: C7(0.3333) C11(0.3333) O4(0.3333) C12(0.3333) C13(0.3333)
 N1S3(0.5) C1S3(0.5) C2S3(0.5)
 Fixed Uiso: H25A(0.078) H22B(0.08) H2A(0.081) H25B(0.076) H6B(0.081)
 H24B(0.076) H9B(0.088) H22C(0.082) H1A(0.089) H24C(0.088) H29A(0.09)
 H27B(0.085) H11B(0.091) H7B(0.082) H24A(0.087) H6A(0.08) H7A(0.086)
 H30A(0.092) H22A(0.091) H25C(0.08) H9A(0.093) H17B(0.091) H12B(0.095)
 H2B(0.095) H4A(0.091) H14B(0.105) H4B(0.097) H29B(0.099) H15B(0.103)
 H18B(0.092) H20A(0.09) H5A(0.101) H1B(0.105) H26B(0.097) H6C(0.098)
 H30B(0.115) H27C(0.111) H18A(0.077) H20B(0.12) H7C(0.117) H9C(0.099)
 H5B(0.111) H26A(0.114) H27A(0.103) H21B(0.127) H17A(0.084) H21A(0.077)
 H26C(0.13) H29C(0.118) H15A(0.095) H14A(0.092) H30C(0.134) H2C(0.082)
 H12A(0.107) H1C(0.101) H4C(0.098) H11A(0.127) H5C(0.126) H15C(0.075)
 H14C(0.087) H11C(0.093) H12C(0.095) H17C(0.081) H18C(0.077) H20C(0.076)
 H21C(0.077) H2SA(0.195) H2SB(0.195) H2SC(0.195) H2SD(0.154) H2SE(0.154)
 H2SF(0.154) H15F(0.083) H14F(0.075) H11F(0.118) H12F(0.123) H17F(0.089)
 H18F(0.081) H20F(0.09) H21F(0.091) H20D(0.094) H18D(0.096) H17D(0.105)
 H21D(0.104) H15D(0.085) H14D(0.083) H12D(0.172) H11D(0.162) H2F(0.103)
 H1F(0.135) H4F(0.133) H5F(0.162) H2TA(0.175) H2TB(0.175) H2TC(0.175)
 H2SG(0.24) H2SH(0.24) H2SI(0.24) H2TD(0.197) H2TE(0.197) H2TF(0.197)
 Fixed X: H25A(0.849189) H22B(0.768906) H2A(-0.052774) H25B(1.015335)
 H6B(0.089615) H24B(0.957192) H9B(0.10681) H22C(0.574385) H1A(-0.162725)
 H24C(0.646373) H29A(0.874769) H27B(1.09826) H11B(0.240276) H7B(-0.025756)
 H24A(0.892154) H6A(0.054016) H7A(0.230743) H30A(0.901811) H22A(0.843163)
 H25C(0.88423) H9A(0.379351) H17B(0.485441) H12B(0.318273) H2B(-0.026248)
 H4A(0.122897) H14B(0.33559) H4B(-0.114548) H29B(1.152383) H15B(0.259203)
 H18B(0.630575) H20A(0.856633) H5A(0.007999) H1B(-0.13423) H26B(1.248062)
 H6C(0.230518) H30B(1.299304) H27C(0.686759) H18A(0.701244) H20B(0.619153)
 H7C(0.420017) H9C(0.410826) H5B(-0.220967) H26A(0.959276) H27A(0.930281)
 H21B(0.473566) H17A(0.65702) H21A(0.812548) H26C(0.739988) H29C(0.936076)
 H15A(0.476389) H14A(0.620632) H30C(0.978711) H2C(0.205666) H12A(0.583402)
 H1C(0.226713) H4C(0.467485) H11A(0.439788) H5C(0.478415) H15C(0.240201)
 H14C(0.286386) H11C(0.490608) H12C(0.536065) H17C(0.41086) H18C(0.499626)
 H20C(0.677571) H21C(0.585593) H2SA(0.748085) H2SB(0.769019) H2SC(0.721763)
 H2SD(0.903266) H2SE(0.849886) H2SF(0.952607) H15F(0.235926) H14F(0.271229)
 H11F(0.467534) H12F(0.501824) H17F(0.380257) H18F(0.48291) H20F(0.669124)
 H21F(0.563878) H20D(0.854395) H18D(0.689027) H17D(0.654868) H21D(0.80902)
 H15D(0.48318) H14D(0.627654) H12D(0.577125) H11D(0.429883) H2F(0.238566)
 H1F(0.28149) H4F(0.481005) H5F(0.516861) H2TA(0.819812) H2TB(0.777906)
 H2TC(0.879855) H2SG(0.272649) H2SH(0.267848) H2SI(0.360281) H2TD(0.338736)
 H2TE(0.380951) H2TF(0.437336)
 Fixed Y: H25A(0.440384) H22B(0.066994) H2A(0.095533) H25B(0.199261)
 H6B(0.309486) H24B(-0.007507) H9B(0.357099) H22C(0.40801) H1A(0.034568)
 H24C(0.3729) H29A(0.553041) H27B(-0.073373) H11B(0.361754) H7B(0.440875)
 H24A(0.481969) H6A(0.147338) H7A(-0.067941) H30A(0.671113) H22A(0.346551)
 H25C(0.241592) H9A(-0.006698) H17B(0.20252) H12B(0.328033) H2B(0.366863) H4A(-
 0.124135) H14B(0.095328) H4B(0.525539) H29B(0.137444) H15B(0.128316)
 H18B(0.202767) H20A(0.133388) H5A(-0.178048) H1B(0.448707) H26B(-0.136691)
 H6C(0.11101) H30B(0.065745) H27C(0.324372) H18A(0.337828) H20B(0.17479)
 H7C(0.205416) H9C(0.299164) H5B(0.599214) H26A(0.704691) H27A(0.587807)
 H21B(0.176985) H17A(0.260098) H21A(0.056084) H26C(0.301437) H29C(0.255235)
 H15A(0.097035) H14A(0.093705) H30C(0.231676) H2C(0.105403) H12A(0.135998)
 H1C(0.035951) H4C(0.074542) H11A(0.138908) H5C(0.006186) H15C(0.414467)
 H14C(0.502729) H11C(0.280983) H12C(0.37018) H17C(0.411946) H18C(0.360862)
 H20C(0.464592) H21C(0.521026) H2SA(0.385984) H2SB(0.351946) H2SC(0.308471)
 H2SD(-0.295469) H2SE(-0.357201) H2SF(-0.381752) H15F(0.422893) H14F(0.506603)
 H11F(0.253629) H12F(0.336943) H17F(0.424788) H18F(0.374026) H20F(0.418207)
 H21F(0.47335) H20D(0.125054) H18D(0.31258) H17D(0.223169) H21D(0.035732)
 H15D(0.064143) H14D(0.055746) H12D(0.102869) H11D(0.1189) H2F(0.116439)
 H1F(0.065348) H4F(0.132971) H5F(0.076079) H2TA(-0.249211) H2TB(-0.318434)
 H2TC(-0.340636) H2SG(0.310283) H2SH(0.24798) H2SI(0.247048) H2TD(0.40131)
 H2TE(0.314259) H2TF(0.375621)
 Fixed Z: H25A(-0.03747) H22B(0.065185) H2A(0.415738) H25B(0.056845)
 H6B(0.510735) H24B(0.067887) H9B(0.257549) H22C(-0.051515) H1A(0.422558) H24C(-
 0.177065) H29A(-0.082778) H27B(0.096388) H11B(0.205621) H7B(0.338323)
 H24A(0.143297) H6A(0.414392) H7A(0.415863) H30A(-0.125886) H22A(0.212531)
 H25C(-0.098993) H9A(0.403229) H17B(0.173937) H12B(0.112893) H2B(0.562717)
 H4A(0.422584) H14B(0.174319) H4B(0.395325) H29B(0.04394) H15B(0.267448)
 H18B(0.163768) H20A(0.198049) H5A(0.427181) H1B(0.618025) H26B(0.106356)
 H6C(0.570663) H30B(0.057204) H27C(-0.272119) H18A(0.251401) H20B(-0.025986)
 H7C(0.607971) H9C(0.475383) H5B(0.453931) H26A(0.048353) H27A(0.098841) H21B(-
 0.016138) H17A(0.340438) H21A(0.287552) H26C(-0.374336) H29C(-0.200958)
 H15A(0.488231) H14A(0.476509) H30C(-0.30487) H2C(0.68739) H12A(0.280873)
 H1C(0.79653) H4C(0.686613) H11A(0.292873) H5C(0.795802) H15C(0.331456)
 H14C(0.253682) H11C(0.372939) H12C(0.295822) H17C(0.137876) H18C(0.057173)
 H20C(0.105546) H21C(0.184793) H2SA(0.411456) H2SB(0.488646) H2SC(0.444927)
 H2SD(0.227399) H2SE(0.252709) H2SF(0.269603) H15F(0.352606) H14F(0.262447)
 H11F(0.343373) H12F(0.253225) H17F(0.093615) H18F(0.019409) H20F(0.125972)
 H21F(0.1984) H20D(0.18453) H18D(0.251226) H17D(0.335499) H21D(0.262867)
 H15D(0.478272) H14D(0.460998) H12D(0.266992) H11D(0.283703) H2F(0.715334)
 H1F(0.825324) H4F(0.686609) H5F(0.795684) H2TA(0.225019) H2TB(0.25463)
 H2TC(0.241377) H2SG(-0.134168) H2SH(-0.069267) H2SI(-0.099069) H2TD(-0.149201)
 H2TE(-0.105704) H2TF(-0.120198)
;
_atom_sites_solution_hydrogens     geom
_atom_sites_solution_primary       ?
_atom_sites_solution_secondary     ?
loop_
  _atom_site_label
  _atom_site_type_symbol
  _atom_site_fract_x
  _atom_site_fract_y
  _atom_site_fract_z
  _atom_site_U_iso_or_equiv
  _atom_site_adp_type
  _atom_site_occupancy
  _atom_site_site_symmetry_order
  _atom_site_calc_flag
  _atom_site_refinement_flags_posn
  _atom_site_refinement_flags_adp
  _atom_site_refinement_flags_occupancy
  _atom_site_disorder_assembly
  _atom_site_disorder_group
 Co2 Co 0.78497(4) 0.28186(4) 0.05124(3) 0.0637(2) Uani 1 1 d . . . . .
 Co1 Co 0.24334(4) 0.21203(4) 0.40759(3) 0.0702(2) Uani 1 1 d . . . . .
 N7A N 0.8794(2) 0.4864(2) 0.04196(17) 0.0638(8) Uani 1 1 d . . . . .
 O1B O 0.3806(2) 0.1871(3) 0.08109(17) 0.0893(11) Uani 1 1 d . . . . .
 N6A N 0.8381(2) 0.3772(2) 0.05030(17) 0.0644(8) Uani 1 1 d . . . . .
 N6B N 0.8973(2) 0.1817(2) 0.05744(17) 0.0630(8) Uani 1 1 d . . . . .
 N2B N 0.0076(2) 0.3916(2) 0.43729(18) 0.0654(8) Uani 1 1 d . . . . .
 N7B N 1.0189(2) 0.0814(2) 0.06261(17) 0.0607(8) Uani 1 1 d . . . . .
 N7C N 0.7769(3) 0.3029(2) -0.16122(17) 0.0658(9) Uani 1 1 d . . . . .
 N3B N 0.1279(2) 0.3007(2) 0.41864(18) 0.0674(9) Uani 1 1 d . . . . .
 N5B N 0.7301(2) 0.1819(2) 0.06429(18) 0.0650(8) Uani 1 1 d . . . . .
 N5C N 0.6550(2) 0.3662(2) 0.02513(18) 0.0660(9) Uani 1 1 d D . . . .
 N2A N 0.1162(2) 0.0264(2) 0.41659(17) 0.0657(8) Uani 1 1 d . . . . .
 N5A N 0.8015(2) 0.2848(3) 0.15687(18) 0.0725(10) Uani 1 1 d D . . . .
 N6C N 0.7781(2) 0.2950(2) -0.05332(18) 0.0640(8) Uani 1 1 d . . . . .
 N3A N 0.1836(2) 0.1194(2) 0.40979(18) 0.0692(9) Uani 1 1 d . . . . .
 N4B N 0.1997(2) 0.2649(2) 0.30502(19) 0.0707(9) Uani 1 1 d . . . . .
 N4C N 0.3303(2) 0.2847(3) 0.41185(17) 0.0701(9) Uani 1 1 d D . . . .
 N3C N 0.2814(2) 0.1850(2) 0.50995(19) 0.0726(10) Uani 1 1 d . . . . .
 N1A N -0.0892(3) -0.0775(3) 0.42522(19) 0.0820(12) Uani 1 1 d . . . . .
 N8A N 0.9304(3) 0.7006(3) -0.0429(2) 0.0806(11) Uani 1 1 d . . . . .
 N4A N 0.3540(3) 0.1084(3) 0.3958(2) 0.0803(11) Uani 1 1 d D . . . .
 N1B N -0.1876(3) 0.5323(3) 0.5418(3) 0.0908(13) Uani 1 1 d . . . . .
 N8B N 1.2870(3) -0.0431(3) 0.0840(3) 0.0941(14) Uani 1 1 d . . . . .
 N2C N 0.3271(3) 0.1433(3) 0.6114(3) 0.0924(13) Uiso 1 1 d D . . . .
 C25A C 0.8542(3) 0.4348(3) 0.0092(2) 0.0654(10) Uani 1 1 d . . . . .
 H25A H 0.849189 0.440384 -0.037470 0.078 Uiso 1 1 calc R U . . .
 C3B C -0.0592(3) 0.4383(3) 0.4729(2) 0.0664(10) Uani 1 1 d . . . . .
 C28B C 1.1106(3) 0.0394(3) 0.0689(2) 0.0658(10) Uani 1 1 d . . . . .
 O1A O 0.7056(6) 0.1019(8) 0.3722(5) 0.072(3) Uani 0.53(3) 1 d D . P A 1
 C23B C 0.8768(3) 0.1106(3) 0.0609(2) 0.0630(10) Uani 1 1 d . . . . .
 C3A C 0.0467(3) -0.0086(3) 0.41934(19) 0.0663(10) Uani 1 1 d . . . . .
 C23A C 0.8522(3) 0.3917(3) 0.1130(2) 0.0703(11) Uani 1 1 d . . . . .
 C22B C 0.7863(3) 0.1140(3) 0.0637(2) 0.0669(10) Uani 1 1 d . . . . .
 H22B H 0.768906 0.066994 0.065185 0.080 Uiso 1 1 calc R U . . .
 C2A C -0.0390(3) 0.0390(3) 0.41861(19) 0.0673(10) Uani 1 1 d . . . . .
 H2A H -0.052774 0.095533 0.415738 0.081 Uiso 1 1 calc R U . . .
 C25B C 0.9829(3) 0.1621(3) 0.0586(2) 0.0629(10) Uani 1 1 d . . . . .
 H25B H 1.015335 0.199261 0.056845 0.076 Uiso 1 1 calc R U . . .
 N8C N 0.8638(4) 0.2659(4) -0.3499(2) 0.1006(15) Uani 1 1 d . . . . .
 C8B C 0.0885(3) 0.3454(3) 0.3596(2) 0.0683(10) Uani 1 1 d . . . . .
 C6B C 0.0783(3) 0.3292(3) 0.4648(2) 0.0673(10) Uani 1 1 d . . . . .
 H6B H 0.089615 0.309486 0.510735 0.081 Uiso 1 1 calc R U . . .
 C24B C 0.9523(3) 0.0478(3) 0.0646(2) 0.0631(10) Uani 1 1 d . . . . .
 H24B H 0.957192 -0.007507 0.067887 0.076 Uiso 1 1 calc R U . . .
 C28A C 0.8967(3) 0.5588(3) 0.0130(2) 0.0672(10) Uani 1 1 d . . . . .
 C9B C 0.1298(3) 0.3262(3) 0.2994(2) 0.0729(11) Uani 1 1 d . . . . .
 H9B H 0.106810 0.357099 0.257549 0.088 Uiso 1 1 calc R U . . .
 C10B C 0.2436(3) 0.2478(3) 0.2459(2) 0.0721(11) Uani 1 1 d D . . . .
 C22C C 0.6320(3) 0.3773(3) -0.0357(2) 0.0682(11) Uani 1 1 d . . . . .
 H22C H 0.574385 0.408010 -0.051515 0.082 Uiso 1 1 calc R U . . .
 C19B C 0.6401(3) 0.1845(3) 0.0693(2) 0.0671(10) Uani 1 1 d D . . . .
 C1A C -0.1040(3) 0.0019(3) 0.4222(2) 0.0741(12) Uani 1 1 d . . . . .
 H1A H -0.162725 0.034568 0.422558 0.089 Uiso 1 1 calc R U . . .
 C24C C 0.6945(3) 0.3458(3) -0.1467(2) 0.0730(11) Uani 1 1 d . . . . .
 H24C H 0.646373 0.372900 -0.177065 0.088 Uiso 1 1 calc R U . . .
 C23C C 0.6960(3) 0.3416(3) -0.0802(2) 0.0648(10) Uani 1 1 d . . . . .
 C13B C 0.3347(3) 0.2090(3) 0.1361(2) 0.0776(12) Uani 1 1 d D . . . .
 C29A C 0.8905(3) 0.5840(3) -0.0542(2) 0.0751(12) Uani 1 1 d . . . . .
 H29A H 0.874769 0.553041 -0.082778 0.090 Uiso 1 1 calc R U . . .
 C27B C 1.1384(3) -0.0432(3) 0.0879(2) 0.0706(11) Uani 1 1 d . . . . .
 H27B H 1.098260 -0.073373 0.096388 0.085 Uiso 1 1 calc R U . . .
 C11B C 0.2603(3) 0.3074(3) 0.1997(2) 0.0758(12) Uani 1 1 d D . . . .
 H11B H 0.240276 0.361754 0.205621 0.091 Uiso 1 1 calc R U . . .
 C7B C 0.0137(3) 0.4022(3) 0.3705(2) 0.0683(10) Uani 1 1 d . . . . .
 H7B H -0.025756 0.440875 0.338323 0.082 Uiso 1 1 calc R U . . .
 C24A C 0.8780(3) 0.4589(3) 0.1080(2) 0.0722(12) Uani 1 1 d . . . . .
 H24A H 0.892154 0.481969 0.143297 0.087 Uiso 1 1 calc R U . . .
 C6A C 0.1079(3) 0.1067(3) 0.4137(2) 0.0664(10) Uani 1 1 d . . . . .
 H6A H 0.054016 0.147338 0.414392 0.080 Uiso 1 1 calc R U . . .
 C19A C 0.7787(14) 0.2409(9) 0.2156(9) 0.068(5) Uani 0.53(3) 1 d D . P A 1
 C8A C 0.2442(3) 0.0452(3) 0.4100(2) 0.0712(11) Uani 1 1 d . . . . .
 C7A C 0.2039(3) -0.0121(3) 0.4145(2) 0.0721(11) Uani 1 1 d . . . . .
 H7A H 0.230743 -0.067941 0.415863 0.086 Uiso 1 1 calc R U . . .
 C28C C 0.8062(4) 0.2911(3) -0.2256(2) 0.0748(12) Uani 1 1 d . . . . .
 C16B C 0.4669(3) 0.1891(3) 0.0797(2) 0.0740(12) Uani 1 1 d D . . . .
 C30A C 0.9072(3) 0.6543(3) -0.0793(3) 0.0764(12) Uani 1 1 d . . . . .
 H30A H 0.901811 0.671113 -0.125886 0.092 Uiso 1 1 calc R U . . .
 C22A C 0.8330(3) 0.3401(4) 0.1686(2) 0.0760(13) Uani 1 1 d . . . . .
 H22A H 0.843163 0.346551 0.212531 0.091 Uiso 1 1 calc R U . . .
 C25C C 0.8248(3) 0.2735(3) -0.1029(2) 0.0664(10) Uani 1 1 d . . . . .
 H25C H 0.884230 0.241592 -0.098993 0.080 Uiso 1 1 calc R U . . .
 C9A C 0.3351(3) 0.0428(3) 0.4028(2) 0.0779(13) Uani 1 1 d . . . . .
 H9A H 0.379351 -0.006698 0.403229 0.093 Uiso 1 1 calc R U . . .
 C17B C 0.5127(3) 0.1967(3) 0.1332(2) 0.0758(12) Uani 1 1 d D . . . .
 H17B H 0.485441 0.202520 0.173937 0.091 Uiso 1 1 calc R U . . .
 C12B C 0.3064(3) 0.2874(4) 0.1446(2) 0.0792(12) Uani 1 1 d D . . . .
 H12B H 0.318273 0.328033 0.112893 0.095 Uiso 1 1 calc R U . . .
 C2B C -0.0653(3) 0.4152(3) 0.5394(3) 0.0791(12) Uani 1 1 d . . . . .
 H2B H -0.026248 0.366863 0.562717 0.095 Uiso 1 1 calc R U . . .
 C4A C 0.0646(4) -0.0904(3) 0.4224(2) 0.0755(12) Uani 1 1 d . . . . .
 H4A H 0.122897 -0.124135 0.422584 0.091 Uiso 1 1 calc R U . . .
 C14B C 0.3168(3) 0.1495(4) 0.1811(3) 0.0873(14) Uani 1 1 d D . . . .
 H14B H 0.335590 0.095328 0.174319 0.105 Uiso 1 1 calc R U . . .
 C4B C -0.1175(3) 0.5079(3) 0.4413(3) 0.0806(13) Uani 1 1 d . . . . .
 H4B H -0.114548 0.525539 0.395325 0.097 Uiso 1 1 calc R U . . .
 C29B C 1.1703(3) 0.0808(3) 0.0572(3) 0.0823(13) Uani 1 1 d . . . . .
 H29B H 1.152383 0.137444 0.043940 0.099 Uiso 1 1 calc R U . . .
 C8C C 0.3450(4) 0.2203(3) 0.5215(3) 0.0815(13) Uiso 1 1 d . . . . .
 C15B C 0.2714(3) 0.1692(3) 0.2361(3) 0.0862(14) Uani 1 1 d D . . . .
 H15B H 0.259203 0.128316 0.267448 0.103 Uiso 1 1 calc R U . . .
 C18B C 0.5993(3) 0.1957(3) 0.1273(2) 0.0770(12) Uani 1 1 d D . . . .
 H18B H 0.630575 0.202767 0.163768 0.092 Uiso 1 1 calc R U . . .
 C20A C 0.8147(16) 0.1584(9) 0.2266(9) 0.075(5) Uani 0.53(3) 1 d D . P A 1
 H20A H 0.856633 0.133388 0.198049 0.090 Uiso 0.53(3) 1 calc R U P A 1
 C10A C 0.4440(7) 0.1125(13) 0.3918(9) 0.067(4) Uani 0.53(3) 1 d D . P A 1
 C5A C -0.0045(4) -0.1218(3) 0.4252(2) 0.0840(14) Uani 1 1 d . . . . .
 H5A H 0.007999 -0.178048 0.427181 0.101 Uiso 1 1 calc R U . . .
 C1B C -0.1305(4) 0.4645(3) 0.5719(3) 0.0875(14) Uani 1 1 d . . . . .
 H1B H -0.134230 0.448707 0.618025 0.105 Uiso 1 1 calc R U . . .
 C26B C 1.2283(3) -0.0799(3) 0.0939(3) 0.0805(13) Uani 1 1 d . . . . .
 H26B H 1.248062 -0.136691 0.106356 0.097 Uiso 1 1 calc R U . . .
 C6C C 0.2713(4) 0.1407(3) 0.5648(3) 0.0817(13) Uiso 1 1 d . . . . .
 H6C H 0.230518 0.111010 0.570663 0.098 Uiso 1 1 calc R U . . .
 C30B C 1.2575(3) 0.0373(4) 0.0653(3) 0.0957(18) Uani 1 1 d . . . . .
 H30B H 1.299304 0.065745 0.057204 0.115 Uiso 1 1 calc R U . . .
 C27C C 0.7478(4) 0.3055(4) -0.2774(3) 0.0927(15) Uani 1 1 d . . . . .
 H27C H 0.686759 0.324372 -0.272119 0.111 Uiso 1 1 calc R U . . .
 C18A C 0.7219(12) 0.2809(9) 0.2582(8) 0.064(3) Uani 0.53(3) 1 d D . P A 1
 H18A H 0.701244 0.337828 0.251401 0.077 Uiso 0.53(3) 1 calc R U P A 1
 C20B C 0.5926(3) 0.1794(4) 0.0151(3) 0.1002(19) Uani 1 1 d D . . . .
 H20B H 0.619153 0.174790 -0.025986 0.120 Uiso 1 1 calc R U . . .
 C7C C 0.3753(4) 0.1929(4) 0.5858(3) 0.0973(16) Uiso 1 1 d . . . . .
 H7C H 0.420017 0.205416 0.607971 0.117 Uiso 1 1 calc R U . . .
 C9C C 0.3683(4) 0.2734(3) 0.4684(3) 0.0823(13) Uiso 1 1 d . . . . .
 H9C H 0.410826 0.299164 0.475383 0.099 Uiso 1 1 calc R U . . .
 C16A C 0.7288(8) 0.1517(9) 0.3197(6) 0.059(3) Uani 0.53(3) 1 d D . P A 1
 C5B C -0.1801(4) 0.5518(4) 0.4769(3) 0.0922(16) Uani 1 1 d . . . . .
 H5B H -0.220967 0.599214 0.453931 0.111 Uiso 1 1 calc R U . . .
 C26A C 0.9399(4) 0.6740(3) 0.0214(3) 0.0949(17) Uani 1 1 d . . . . .
 H26A H 0.959276 0.704691 0.048353 0.114 Uiso 1 1 calc R U . . .
 C27A C 0.9234(4) 0.6039(3) 0.0523(3) 0.0858(14) Uani 1 1 d . . . . .
 H27A H 0.930281 0.587807 0.098841 0.103 Uiso 1 1 calc R U . . .
 C21B C 0.5060(3) 0.1813(5) 0.0209(3) 0.106(2) Uani 1 1 d D . . . .
 H21B H 0.473566 0.176985 -0.016138 0.127 Uiso 1 1 calc R U . . .
 C17A C 0.6966(10) 0.2350(9) 0.3105(8) 0.070(3) Uani 0.53(3) 1 d D . P A 1
 H17A H 0.657020 0.260098 0.340438 0.084 Uiso 0.53(3) 1 calc R U P A 1
 C21A C 0.7891(10) 0.1129(8) 0.2793(6) 0.064(3) Uani 0.53(3) 1 d D . P A 1
 H21A H 0.812548 0.056084 0.287552 0.077 Uiso 0.53(3) 1 calc R U P A 1
 C26C C 0.7808(5) 0.2916(5) -0.3383(3) 0.108(2) Uani 1 1 d . . . . .
 H26C H 0.739988 0.301437 -0.374336 0.130 Uiso 1 1 calc R U . . .
 C29C C 0.8937(4) 0.2646(4) -0.2358(3) 0.0981(17) Uani 1 1 d . . . . .
 H29C H 0.936076 0.255235 -0.200958 0.118 Uiso 1 1 calc R U . . .
 C15A C 0.4982(8) 0.1027(13) 0.4453(8) 0.079(5) Uani 0.53(3) 1 d D . P A 1
 H15A H 0.476389 0.097035 0.488231 0.095 Uiso 0.53(3) 1 calc R U P A 1
 C13A C 0.6171(6) 0.1091(8) 0.3773(6) 0.060(3) Uani 0.53(3) 1 d D . P A 1
 C14A C 0.5841(7) 0.1008(14) 0.4384(7) 0.077(4) Uani 0.53(3) 1 d D . P A 1
 H14A H 0.620632 0.093705 0.476509 0.092 Uiso 0.53(3) 1 calc R U P A 1
 C30C C 0.9181(5) 0.2520(5) -0.2984(3) 0.112(2) Uani 1 1 d . . . . .
 H30C H 0.978711 0.231676 -0.304870 0.134 Uiso 1 1 calc R U . . .
 C3C C 0.3354(4) 0.0948(4) 0.6767(3) 0.0656(16) Uiso 0.681(7) 1 d D . P B 1
 C2C C 0.2622(4) 0.0851(4) 0.7087(3) 0.0682(17) Uiso 0.681(7) 1 d D . P B 1
 H2C H 0.205666 0.105403 0.687390 0.082 Uiso 0.681(7) 1 calc R U P B 1
 N1C N 0.3542(5) 0.0159(5) 0.8052(4) 0.104(2) Uiso 0.681(7) 1 d D . P B 1
 C12A C 0.5627(8) 0.1255(12) 0.3238(7) 0.089(5) Uani 0.53(3) 1 d D . P A 1
 H12A H 0.583402 0.135998 0.280873 0.107 Uiso 0.53(3) 1 calc R U P A 1
 C1C C 0.2756(5) 0.0442(5) 0.7736(4) 0.084(2) Uiso 0.681(7) 1 d D . P B 1
 H1C H 0.226713 0.035951 0.796530 0.101 Uiso 0.681(7) 1 calc R U P B 1
 C4C C 0.4174(5) 0.0669(5) 0.7081(4) 0.082(2) Uiso 0.681(7) 1 d D . P B 1
 H4C H 0.467485 0.074542 0.686613 0.098 Uiso 0.681(7) 1 calc R U P B 1
 C11A C 0.4773(10) 0.1272(17) 0.3312(9) 0.105(6) Uani 0.53(3) 1 d D . P A 1
 H11A H 0.439788 0.138908 0.292873 0.127 Uiso 0.53(3) 1 calc R U P A 1
 C5C C 0.4227(7) 0.0268(6) 0.7732(5) 0.105(3) Uiso 0.681(7) 1 d D . P B 1
 H5C H 0.478415 0.006186 0.795802 0.126 Uiso 0.681(7) 1 calc R U P B 1
 C19C C 0.5984(7) 0.4072(9) 0.0724(7) 0.053(3) Uani 0.508(17) 1 d D . P C 1
 C10C C 0.3613(10) 0.3389(12) 0.3628(11) 0.068(4) Uani 0.508(17) 1 d D . P C
 1
 C15C C 0.3008(11) 0.4051(11) 0.3251(11) 0.063(4) Uani 0.508(17) 1 d D . P C
 1
 H15C H 0.240201 0.414467 0.331456 0.075 Uiso 0.508(17) 1 calc R U P C 1
 C14C C 0.3286(10) 0.4574(12) 0.2782(12) 0.072(5) Uani 0.508(17) 1 d D . P C
 1
 H14C H 0.286386 0.502729 0.253682 0.087 Uiso 0.508(17) 1 calc R U P C 1
 C13C C 0.4152(8) 0.4456(6) 0.2663(5) 0.065(3) Uani 0.508(17) 1 d D . P C 1
 C11C C 0.4482(9) 0.3269(8) 0.3494(6) 0.077(4) Uani 0.508(17) 1 d D . P C 1
 H11C H 0.490608 0.280983 0.372939 0.093 Uiso 0.508(17) 1 calc R U P C 1
 C12C C 0.4756(8) 0.3795(7) 0.3028(6) 0.079(3) Uani 0.508(17) 1 d D . P C 1
 H12C H 0.536065 0.370180 0.295822 0.095 Uiso 0.508(17) 1 calc R U P C 1
 O1C O 0.4406(6) 0.5011(5) 0.2205(4) 0.071(2) Uani 0.508(17) 1 d D . P C 1
 C16C C 0.4922(7) 0.4683(6) 0.1700(5) 0.059(3) Uani 0.508(17) 1 d D . P C 1
 C17C C 0.4652(9) 0.4225(7) 0.1314(7) 0.068(3) Uani 0.508(17) 1 d D . P C 1
 H17C H 0.410860 0.411946 0.137876 0.081 Uiso 0.508(17) 1 calc R U P C 1
 C18C C 0.5180(7) 0.3926(8) 0.0836(7) 0.064(3) Uani 0.508(17) 1 d D . P C 1
 H18C H 0.499626 0.360862 0.057173 0.077 Uiso 0.508(17) 1 calc R U P C 1
 C20C C 0.6230(6) 0.4543(8) 0.1116(6) 0.063(3) Uani 0.508(17) 1 d D . P C 1
 H20C H 0.677571 0.464592 0.105546 0.076 Uiso 0.508(17) 1 calc R U P C 1
 C21C C 0.5693(6) 0.4868(8) 0.1597(5) 0.064(3) Uani 0.508(17) 1 d D . P C 1
 H21C H 0.585593 0.521026 0.184793 0.077 Uiso 0.508(17) 1 calc R U P C 1
 F5 F 0.0440(2) 0.4878(2) 0.18671(15) 0.0922(8) Uani 1 1 d . . . . .
 F7 F 0.1128(2) 0.5380(2) 0.25807(15) 0.1010(10) Uani 1 1 d . . . . .
 F6 F 0.1674(3) 0.5219(3) 0.15668(16) 0.1095(11) Uani 1 1 d . . . . .
 F8 F 0.0458(3) 0.6192(2) 0.1626(2) 0.1372(17) Uani 1 1 d . . . . .
 B2 B 0.0906(5) 0.5428(4) 0.1914(3) 0.093(2) Uani 1 1 d . . . . .
 F12A F 0.7466(8) 0.5695(7) 0.3080(6) 0.107(3) Uani 0.501(19) 1 d D . P D 1
 F9A F 0.8432(9) 0.4639(13) 0.2785(9) 0.236(10) Uani 0.501(19) 1 d D . P D 1
 F10A F 0.7115(9) 0.4610(7) 0.2924(8) 0.141(4) Uani 0.501(19) 1 d D . P D 1
 F11A F 0.7295(6) 0.5436(10) 0.2078(5) 0.131(4) Uani 0.501(19) 1 d D . P D 1
 B3A B 0.7595(9) 0.5103(9) 0.2715(7) 0.107(4) Uani 0.501(19) 1 d D . P D 1
 N1S1 N 0.9154(4) 0.2458(3) 0.4210(3) 0.1042(15) Uani 1 1 d . . . . .
 C1S1 C 0.8506(4) 0.2855(4) 0.4307(3) 0.0894(14) Uani 1 1 d . . . . .
 C2S1 C 0.7653(5) 0.3373(5) 0.4451(5) 0.130(3) Uani 1 1 d . . . . .
 H2SA H 0.748085 0.385984 0.411456 0.195 Uiso 1 1 calc R U . . .
 H2SB H 0.769019 0.351946 0.488646 0.195 Uiso 1 1 calc R U . . .
 H2SC H 0.721763 0.308471 0.444927 0.195 Uiso 1 1 calc R U . . .
 O1ET O 0.0358(5) 0.0673(4) 0.2125(4) 0.101(2) Uiso 0.626(8) 1 d D . P E 1
 C1ET C 0.0376(7) 0.2000(6) 0.2170(5) 0.094(3) Uiso 0.626(8) 1 d D . P E 1
 C2ET C 0.0489(8) 0.1154(7) 0.2502(6) 0.106(3) Uiso 0.626(8) 1 d D . P E 1
 C3ET C 0.0464(7) -0.0142(5) 0.2424(5) 0.102(3) Uiso 0.626(8) 1 d D . P E 1
 C4ET C 0.1385(9) -0.0585(8) 0.2623(8) 0.134(5) Uiso 0.626(8) 1 d D . P E 1
 N1S2 N 0.8657(19) -0.2754(18) 0.3708(8) 0.082(4) Uani 0.65(3) 1 d D . P F 1
 C1S2 C 0.8811(13) -0.3043(14) 0.3241(8) 0.075(4) Uani 0.65(3) 1 d D . P F 1
 C2S2 C 0.8981(14) -0.3374(10) 0.2635(7) 0.102(5) Uani 0.65(3) 1 d D . P F 1
 H2SD H 0.903266 -0.295469 0.227399 0.154 Uiso 0.65(3) 1 calc R U P F 1
 H2SE H 0.849886 -0.357201 0.252709 0.154 Uiso 0.65(3) 1 calc R U P F 1
 H2SF H 0.952607 -0.381752 0.269603 0.154 Uiso 0.65(3) 1 calc R U P F 1
 C10F C 0.3503(11) 0.3330(13) 0.3553(11) 0.074(6) Uani 0.492(17) 1 d D . P C
 2
 C15F C 0.2900(12) 0.4063(13) 0.3322(12) 0.069(5) Uani 0.492(17) 1 d D . P C
 2
 H15F H 0.235926 0.422893 0.352606 0.083 Uiso 0.492(17) 1 calc R U P C 2
 C14F C 0.3102(10) 0.4549(11) 0.2788(11) 0.062(4) Uani 0.492(17) 1 d D . P C
 2
 H14F H 0.271229 0.506603 0.262447 0.075 Uiso 0.492(17) 1 calc R U P C 2
 C13F C 0.3881(9) 0.4271(8) 0.2494(6) 0.073(3) Uani 0.492(17) 1 d D . P C 2
 C11F C 0.4282(9) 0.3051(11) 0.3267(8) 0.098(6) Uani 0.492(17) 1 d D . P C 2
 H11F H 0.467534 0.253629 0.343373 0.118 Uiso 0.492(17) 1 calc R U P C 2
 C12F C 0.4477(9) 0.3537(9) 0.2734(8) 0.102(6) Uani 0.492(17) 1 d D . P C 2
 H12F H 0.501824 0.336943 0.253225 0.123 Uiso 0.492(17) 1 calc R U P C 2
 C19F C 0.5841(8) 0.3932(11) 0.0655(8) 0.069(4) Uani 0.492(17) 1 d D . P C 2
 O1F O 0.4034(8) 0.4818(6) 0.1983(6) 0.091(5) Uani 0.492(17) 1 d D . P C 2
 C16F C 0.4651(9) 0.4499(8) 0.1527(7) 0.069(4) Uani 0.492(17) 1 d D . P C 2
 C17F C 0.4394(8) 0.4231(6) 0.0998(8) 0.074(3) Uani 0.492(17) 1 d D . P C 2
 H17F H 0.380257 0.424788 0.093615 0.089 Uiso 0.492(17) 1 calc R U P C 2
 C18F C 0.4995(7) 0.3937(7) 0.0559(8) 0.067(3) Uani 0.492(17) 1 d D . P C 2
 H18F H 0.482910 0.374026 0.019409 0.081 Uiso 0.492(17) 1 calc R U P C 2
 C20F C 0.6098(8) 0.4207(9) 0.1192(6) 0.075(3) Uani 0.492(17) 1 d D . P C 2
 H20F H 0.669124 0.418207 0.125972 0.090 Uiso 0.492(17) 1 calc R U P C 2
 C21F C 0.5485(9) 0.4516(9) 0.1627(5) 0.075(3) Uani 0.492(17) 1 d D . P C 2
 H21F H 0.563878 0.473350 0.198400 0.091 Uiso 0.492(17) 1 calc R U P C 2
 O1D O 0.7021(8) 0.0667(18) 0.3547(11) 0.116(8) Uani 0.47(3) 1 d D . P A 2
 C19D C 0.7774(14) 0.2282(12) 0.2091(8) 0.075(5) Uani 0.47(3) 1 d D . P A 2
 C20D C 0.8116(13) 0.1457(11) 0.2143(12) 0.078(6) Uani 0.47(3) 1 d D . P A 2
 H20D H 0.854395 0.125054 0.184530 0.094 Uiso 0.47(3) 1 calc R U P A 2
 C18D C 0.7158(14) 0.2565(16) 0.2541(9) 0.080(6) Uani 0.47(3) 1 d D . P A 2
 H18D H 0.689027 0.312580 0.251226 0.096 Uiso 0.47(3) 1 calc R U P A 2
 C16D C 0.7259(10) 0.1214(17) 0.3059(10) 0.086(6) Uani 0.47(3) 1 d D . P A 2
 C17D C 0.6935(12) 0.2030(17) 0.3031(9) 0.087(6) Uani 0.47(3) 1 d D . P A 2
 H17D H 0.654868 0.223169 0.335499 0.105 Uiso 0.47(3) 1 calc R U P A 2
 C21D C 0.7857(11) 0.0920(15) 0.2615(11) 0.087(6) Uani 0.47(3) 1 d D . P A 2
 H21D H 0.809020 0.035732 0.262867 0.104 Uiso 0.47(3) 1 calc R U P A 2
 C13D C 0.6132(8) 0.0797(17) 0.3622(8) 0.085(6) Uani 0.47(3) 1 d D . P A 2
 C10D C 0.4447(8) 0.0928(17) 0.3825(8) 0.075(6) Uani 0.47(3) 1 d D . P A 2
 C15D C 0.5021(8) 0.0736(12) 0.4347(8) 0.071(5) Uani 0.47(3) 1 d D . P A 2
 H15D H 0.483180 0.064143 0.478272 0.085 Uiso 0.47(3) 1 calc R U P A 2
 C14D C 0.5869(8) 0.0679(12) 0.4245(7) 0.069(4) Uani 0.47(3) 1 d D . P A 2
 H14D H 0.627654 0.055746 0.460998 0.083 Uiso 0.47(3) 1 calc R U P A 2
 C12D C 0.5572(9) 0.097(2) 0.3105(9) 0.143(14) Uani 0.47(3) 1 d D . P A 2
 H12D H 0.577125 0.102869 0.266992 0.172 Uiso 0.47(3) 1 calc R U P A 2
 C11D C 0.4708(10) 0.105(2) 0.3202(9) 0.135(13) Uani 0.47(3) 1 d D . P A 2
 H11D H 0.429883 0.118900 0.283703 0.162 Uiso 0.47(3) 1 calc R U P A 2
 B1A B 0.6068(4) 0.2180(4) 0.5699(6) 0.115(4) Uani 0.55(2) 1 d DG . P G 1
 F3A F 0.5924(9) 0.2595(7) 0.6233(8) 0.147(5) Uani 0.55(2) 1 d DG . P G 1
 F4A F 0.5612(8) 0.2686(7) 0.5133(9) 0.157(7) Uani 0.55(2) 1 d DG . P G 1
 F1A F 0.6964(5) 0.1939(8) 0.5589(4) 0.087(3) Uani 0.55(2) 1 d DG . P G 1
 F2A F 0.5774(10) 0.1503(5) 0.5842(8) 0.141(5) Uani 0.55(2) 1 d DG . P G 1
 B1B B 0.6106(5) 0.2132(5) 0.5443(7) 0.121(5) Uani 0.45(2) 1 d DG . P G 2
 F3B F 0.5506(12) 0.2702(7) 0.5745(15) 0.181(10) Uani 0.45(2) 1 d DG . P G 2
 F4B F 0.5998(12) 0.2366(11) 0.4755(8) 0.146(6) Uani 0.45(2) 1 d DG . P G 2
 F1B F 0.6957(7) 0.2077(12) 0.5646(7) 0.111(5) Uani 0.45(2) 1 d DG . P G 2
 F2B F 0.5963(11) 0.1382(6) 0.5624(8) 0.111(4) Uani 0.45(2) 1 d DG . P G 2
 F12B F 0.7764(13) 0.5238(16) 0.3225(6) 0.171(7) Uani 0.499(19) 1 d D . P D 2
 B3B B 0.7822(10) 0.4960(9) 0.2651(6) 0.104(5) Uani 0.499(19) 1 d D . P D 2
 F9B F 0.8646(7) 0.4487(10) 0.2614(5) 0.127(5) Uani 0.499(19) 1 d D . P D 2
 F10B F 0.7212(6) 0.4616(8) 0.2521(9) 0.134(5) Uani 0.499(19) 1 d D . P D 2
 F11B F 0.7757(14) 0.5551(6) 0.2113(5) 0.145(6) Uani 0.499(19) 1 d D . P D 2
 B4A B 0.9021(3) -0.1440(2) 0.12582(16) 0.077(2) Uani 0.636(18) 1 d DG . P H 1
 F13A F 0.9818(3) -0.1526(5) 0.0953(3) 0.082(2) Uani 0.636(18) 1 d DG . P H 1
 F14A F 0.8451(4) -0.0672(3) 0.1027(4) 0.077(2) Uani 0.636(18) 1 d DG . P H 1
 F15A F 0.8653(5) -0.2020(4) 0.1109(4) 0.101(3) Uani 0.636(18) 1 d DG . P H 1
 F16A F 0.9164(4) -0.1543(5) 0.19438(17) 0.102(3) Uani 0.636(18) 1 d DG . P H
 1
 B4B B 0.9106(8) -0.1254(10) 0.1296(6) 0.141(7) Uani 0.364(18) 1 d DG . P H 2
 F13B F 0.9866(11) -0.1362(12) 0.0939(9) 0.143(8) Uani 0.364(18) 1 d DG . P H
 2
 F14B F 0.8392(12) -0.0747(8) 0.0890(8) 0.130(6) Uani 0.364(18) 1 d DG . P H
 2
 F15B F 0.8967(10) -0.1999(10) 0.1510(15) 0.190(13) Uani 0.364(18) 1 d DG . P H
 2
 F16B F 0.9201(11) -0.091(2) 0.1845(7) 0.197(10) Uani 0.364(18) 1 d DG . P H
 2
 C3F C 0.3563(9) 0.1288(10) 0.6864(6) 0.080(4) Uiso 0.319(7) 1 d D . P B 2
 C2F C 0.2969(10) 0.1087(10) 0.7302(7) 0.086(5) Uiso 0.319(7) 1 d D . P B 2
 H2F H 0.238566 0.116439 0.715334 0.103 Uiso 0.319(7) 1 calc R U P B 2
 N1F N 0.4039(12) 0.0620(12) 0.8205(10) 0.137(7) Uiso 0.319(7) 1 d D . P B 2
 C1F C 0.3238(13) 0.0769(14) 0.7961(8) 0.112(7) Uiso 0.319(7) 1 d D . P B 2
 H1F H 0.281490 0.065348 0.825324 0.135 Uiso 0.319(7) 1 calc R U P B 2
 C4F C 0.4384(11) 0.1175(12) 0.7134(9) 0.111(6) Uiso 0.319(7) 1 d D . P B 2
 H4F H 0.481005 0.132971 0.686609 0.133 Uiso 0.319(7) 1 calc R U P B 2
 C5F C 0.4592(14) 0.0839(12) 0.7791(9) 0.135(9) Uiso 0.319(7) 1 d D . P B 2
 H5F H 0.516861 0.076079 0.795684 0.162 Uiso 0.319(7) 1 calc R U P B 2
 C7 C 0.6110(16) 0.4750(15) 0.5884(12) 0.129(9) Uiso 0.3333 1 d G . P I -1
 C11 C 0.5885(12) 0.4661(19) 0.5190(12) 0.206(16) Uiso 0.3333 1 d G . P I -1
 O4 O 0.4964(12) 0.4958(11) 0.5073(8) 0.116(4) Uiso 0.3333 1 d G . P I -1
 C12 C 0.4682(16) 0.490(2) 0.4435(11) 0.225(18) Uiso 0.3333 1 d G . P I -1
 C13 C 0.3692(16) 0.5237(16) 0.4367(13) 0.133(9) Uiso 0.3333 1 d G . P I -1
 N1T2 N 0.881(4) -0.294(4) 0.3732(19) 0.101(13) Uani 0.35(3) 1 d D . P F 2
 C1T2 C 0.848(3) -0.290(3) 0.3220(13) 0.082(9) Uani 0.35(3) 1 d D . P F 2
 C2T2 C 0.830(3) -0.3004(19) 0.2553(9) 0.116(14) Uani 0.35(3) 1 d D . P F 2
 H2TA H 0.819812 -0.249211 0.225019 0.175 Uiso 0.35(3) 1 calc R U P F 2
 H2TB H 0.777906 -0.318434 0.254630 0.175 Uiso 0.35(3) 1 calc R U P F 2
 H2TC H 0.879855 -0.340636 0.241377 0.175 Uiso 0.35(3) 1 calc R U P F 2
 N1S3 N 0.3518(6) -0.0234(5) 0.2719(5) 0.091(2) Uiso 0.5 1 d G . P J 1
 C1S3 C 0.3663(7) -0.0911(5) 0.2692(5) 0.109(4) Uiso 0.5 1 d G . P J 1
 C2S3 C 0.3845(14) -0.1757(6) 0.2659(11) 0.192(9) Uiso 0.5 1 d G . P J 1
 O1EU O 0.1536(7) 0.0246(6) 0.2477(6) 0.100(4) Uiso 0.374(8) 1 d D . P E 2
 C2EU C 0.0638(10) 0.0572(10) 0.2454(11) 0.104(5) Uiso 0.374(8) 1 d D . P E 2
 C3EU C 0.1871(11) -0.0605(8) 0.2595(11) 0.115(6) Uiso 0.374(8) 1 d D . P E 2
 C1EU C 0.0468(14) 0.1470(11) 0.2283(12) 0.113(6) Uiso 0.374(8) 1 d D . P E 2
 C4EU C 0.2850(10) -0.0875(10) 0.2620(9) 0.104(5) Uiso 0.374(8) 1 d D . P E 2
 N1S4 N 0.3163(5) 0.3843(5) -0.0182(4) 0.090(3) Uiso 0.563(9) 1 d DG . P K 1
 C1S4 C 0.3100(5) 0.3385(5) -0.0508(4) 0.103(3) Uiso 0.563(9) 1 d DG . P K 1
 C2S4 C 0.3020(11) 0.2813(8) -0.0917(7) 0.160(7) Uiso 0.563(9) 1 d DG . P K 1
 H2SG H 0.272649 0.310283 -0.134168 0.240 Uiso 0.563(9) 1 calc R U P K 1
 H2SH H 0.267848 0.247980 -0.069267 0.240 Uiso 0.563(9) 1 calc R U P K 1
 H2SI H 0.360281 0.247048 -0.099069 0.240 Uiso 0.563(9) 1 calc R U P K 1
 N1T4 N 0.3241(6) 0.4281(6) -0.0047(4) 0.080(3) Uiso 0.437(9) 1 d DG . P K 2
 C1T4 C 0.3485(5) 0.4027(5) -0.0522(4) 0.087(4) Uiso 0.437(9) 1 d DG . P K 2
 C2T4 C 0.3788(11) 0.3709(10) -0.1117(6) 0.132(6) Uiso 0.437(9) 1 d DG . P K
 2
 H2TD H 0.338736 0.401310 -0.149201 0.197 Uiso 0.437(9) 1 calc R U P K 2
 H2TE H 0.380951 0.314259 -0.105704 0.197 Uiso 0.437(9) 1 calc R U P K 2
 H2TF H 0.437336 0.375621 -0.120198 0.197 Uiso 0.437(9) 1 calc R U P K 2

loop_
  _atom_site_aniso_label
  _atom_site_aniso_U_11
  _atom_site_aniso_U_22
  _atom_site_aniso_U_33
  _atom_site_aniso_U_23
  _atom_site_aniso_U_13
  _atom_site_aniso_U_12
 Co2 0.0552(3) 0.0725(4) 0.0571(3) -0.0013(3) 0.0054(2) -0.0149(3)
 Co1 0.0544(3) 0.0884(4) 0.0648(4) -0.0116(3) 0.0057(3) -0.0176(3)
 N7A 0.0517(17) 0.081(2) 0.0582(19) -0.0122(17) 0.0005(14) -0.0193(16)
 O1B 0.0507(16) 0.149(3) 0.074(2) -0.046(2) 0.0074(14) -0.0254(18)
 N6A 0.0591(19) 0.075(2) 0.0550(19) -0.0085(16) 0.0022(15) -0.0151(16)
 N6B 0.0572(19) 0.071(2) 0.0581(19) -0.0034(16) 0.0064(15) -0.0190(16)
 N2B 0.0565(19) 0.078(2) 0.064(2) -0.0146(17) 0.0049(16) -0.0226(17)
 N7B 0.0515(17) 0.075(2) 0.0550(18) -0.0134(15) 0.0015(14) -0.0175(16)
 N7C 0.074(2) 0.072(2) 0.058(2) -0.0102(16) 0.0081(16) -0.0312(18)
 N3B 0.0589(19) 0.079(2) 0.064(2) -0.0127(17) 0.0019(16) -0.0198(17)
 N5B 0.0552(18) 0.074(2) 0.060(2) -0.0007(16) 0.0054(15) -0.0166(17)
 N5C 0.0591(19) 0.073(2) 0.058(2) 0.0063(16) 0.0091(15) -0.0166(16)
 N2A 0.067(2) 0.074(2) 0.0522(18) -0.0072(16) 0.0060(15) -0.0183(17)
 N5A 0.0521(18) 0.100(3) 0.0542(19) 0.0040(18) 0.0060(15) -0.0150(19)
 N6C 0.0565(18) 0.073(2) 0.063(2) -0.0016(16) 0.0049(16) -0.0256(16)
 N3A 0.060(2) 0.082(2) 0.063(2) -0.0122(18) 0.0076(16) -0.0169(18)
 N4B 0.059(2) 0.086(2) 0.065(2) -0.0169(18) 0.0022(16) -0.0166(18)
 N4C 0.060(2) 0.094(3) 0.0496(18) 0.0011(17) -0.0032(15) -0.0205(18)
 N3C 0.0576(19) 0.088(2) 0.064(2) 0.0040(18) 0.0095(16) -0.0197(18)
 N1A 0.108(3) 0.098(3) 0.053(2) -0.0074(19) 0.014(2) -0.054(3)
 N8A 0.074(2) 0.078(2) 0.088(3) -0.009(2) -0.019(2) -0.022(2)
 N4A 0.058(2) 0.092(3) 0.083(3) -0.009(2) 0.0131(19) -0.012(2)
 N1B 0.086(3) 0.089(3) 0.096(3) -0.024(2) 0.025(2) -0.020(2)
 N8B 0.059(2) 0.114(4) 0.111(4) -0.049(3) -0.002(2) -0.012(2)
 C25A 0.060(2) 0.075(3) 0.056(2) -0.008(2) -0.0027(18) -0.014(2)
 C3B 0.062(2) 0.073(3) 0.069(3) -0.014(2) 0.009(2) -0.027(2)
 C28B 0.052(2) 0.088(3) 0.059(2) -0.023(2) 0.0007(17) -0.019(2)
 O1A 0.047(3) 0.087(6) 0.067(5) 0.019(4) -0.005(3) -0.017(3)
 C23B 0.055(2) 0.071(2) 0.059(2) -0.0035(18) 0.0071(17) -0.0175(19)
 C3A 0.076(3) 0.078(3) 0.043(2) -0.0040(18) 0.0086(18) -0.025(2)
 C23A 0.048(2) 0.098(3) 0.062(2) -0.011(2) 0.0039(18) -0.019(2)
 C22B 0.060(2) 0.075(3) 0.063(2) 0.000(2) 0.0067(19) -0.022(2)
 C2A 0.078(3) 0.079(3) 0.045(2) -0.0017(18) 0.0028(18) -0.029(2)
 C25B 0.054(2) 0.076(3) 0.058(2) -0.0079(19) 0.0029(17) -0.0196(19)
 N8C 0.121(4) 0.129(4) 0.072(3) -0.027(3) 0.022(3) -0.062(3)
 C8B 0.056(2) 0.081(3) 0.066(3) -0.012(2) 0.0003(19) -0.019(2)
 C6B 0.061(2) 0.077(3) 0.065(2) -0.008(2) 0.007(2) -0.025(2)
 C24B 0.057(2) 0.070(2) 0.061(2) -0.0096(19) 0.0037(18) -0.0178(19)
 C28A 0.052(2) 0.078(3) 0.068(3) -0.014(2) -0.0022(18) -0.0118(19)
 C9B 0.062(2) 0.095(3) 0.063(3) -0.016(2) 0.002(2) -0.023(2)
 C10B 0.052(2) 0.100(3) 0.062(2) -0.019(2) -0.0001(18) -0.016(2)
 C22C 0.061(2) 0.070(2) 0.065(3) 0.010(2) -0.0020(19) -0.0187(19)
 C19B 0.051(2) 0.077(3) 0.068(2) 0.000(2) 0.0030(17) -0.0170(19)
 C1A 0.082(3) 0.094(3) 0.049(2) -0.002(2) 0.008(2) -0.036(3)
 C24C 0.079(3) 0.075(3) 0.061(3) 0.001(2) 0.000(2) -0.024(2)
 C23C 0.065(2) 0.070(2) 0.058(2) 0.0007(19) -0.0005(18) -0.024(2)
 C13B 0.050(2) 0.123(4) 0.061(2) -0.026(2) -0.0040(18) -0.023(2)
 C29A 0.070(3) 0.098(3) 0.067(3) -0.016(2) 0.000(2) -0.039(2)
 C27B 0.061(2) 0.078(3) 0.069(3) -0.019(2) -0.001(2) -0.012(2)
 C11B 0.065(3) 0.104(3) 0.062(2) -0.021(2) -0.001(2) -0.028(2)
 C7B 0.066(2) 0.079(3) 0.063(2) -0.013(2) 0.0046(19) -0.024(2)
 C24A 0.056(2) 0.110(4) 0.056(2) -0.019(2) 0.0057(18) -0.031(2)
 C6A 0.061(2) 0.082(3) 0.053(2) -0.0082(19) 0.0086(18) -0.019(2)
 C19A 0.048(8) 0.078(7) 0.076(11) -0.008(7) 0.004(7) -0.018(6)
 C8A 0.068(3) 0.077(3) 0.061(2) -0.010(2) 0.009(2) -0.011(2)
 C7A 0.073(3) 0.078(3) 0.056(2) -0.010(2) 0.004(2) -0.009(2)
 C28C 0.091(3) 0.082(3) 0.063(3) -0.015(2) 0.013(2) -0.043(3)
 C16B 0.051(2) 0.099(3) 0.073(3) -0.020(2) 0.0017(19) -0.019(2)
 C30A 0.067(3) 0.097(3) 0.071(3) -0.010(2) -0.006(2) -0.034(2)
 C22A 0.054(2) 0.118(4) 0.056(2) -0.011(2) 0.0032(18) -0.028(2)
 C25C 0.066(2) 0.076(3) 0.062(2) -0.009(2) 0.009(2) -0.029(2)
 C9A 0.063(3) 0.094(3) 0.061(3) -0.008(2) 0.010(2) -0.003(2)
 C17B 0.060(2) 0.108(4) 0.060(2) -0.002(2) 0.0058(19) -0.032(2)
 C12B 0.066(3) 0.117(4) 0.061(2) -0.024(3) 0.004(2) -0.035(3)
 C2B 0.075(3) 0.084(3) 0.075(3) -0.015(2) 0.008(2) -0.017(2)
 C4A 0.089(3) 0.082(3) 0.056(2) -0.008(2) 0.015(2) -0.028(3)
 C14B 0.067(3) 0.106(4) 0.080(3) -0.028(3) 0.000(2) -0.006(3)
 C4B 0.073(3) 0.083(3) 0.082(3) -0.009(2) 0.019(2) -0.021(2)
 C29B 0.058(2) 0.093(3) 0.100(4) -0.033(3) 0.011(2) -0.020(2)
 C15B 0.071(3) 0.098(3) 0.077(3) -0.011(3) 0.008(2) -0.009(3)
 C18B 0.062(2) 0.110(4) 0.060(2) 0.001(2) -0.0003(19) -0.036(2)
 C20A 0.076(10) 0.101(9) 0.054(8) -0.010(6) 0.002(7) -0.036(8)
 C10A 0.055(6) 0.065(8) 0.079(8) -0.024(6) 0.022(5) -0.008(4)
 C5A 0.111(4) 0.084(3) 0.060(3) -0.011(2) 0.024(3) -0.036(3)
 C1B 0.095(4) 0.090(3) 0.078(3) -0.017(3) 0.018(3) -0.026(3)
 C26B 0.063(3) 0.091(3) 0.084(3) -0.029(3) -0.003(2) -0.011(2)
 C30B 0.058(3) 0.121(5) 0.124(5) -0.058(4) 0.012(3) -0.032(3)
 C27C 0.097(4) 0.120(4) 0.068(3) -0.018(3) 0.002(3) -0.042(3)
 C18A 0.053(5) 0.077(7) 0.064(6) 0.000(5) 0.002(4) -0.029(6)
 C20B 0.053(2) 0.168(6) 0.075(3) -0.041(4) 0.008(2) -0.016(3)
 C16A 0.051(5) 0.072(8) 0.048(5) 0.008(5) -0.006(4) -0.022(5)
 C5B 0.085(3) 0.086(3) 0.095(4) -0.008(3) 0.021(3) -0.013(3)
 C26A 0.109(4) 0.084(3) 0.092(4) -0.019(3) -0.024(3) -0.027(3)
 C27A 0.099(4) 0.084(3) 0.073(3) -0.014(2) -0.018(3) -0.025(3)
 C21B 0.054(2) 0.186(7) 0.083(3) -0.063(4) 0.004(2) -0.020(3)
 C17A 0.054(5) 0.076(7) 0.075(7) -0.005(6) -0.002(4) -0.016(5)
 C21A 0.067(6) 0.074(6) 0.048(6) -0.001(4) -0.006(5) -0.021(5)
 C26C 0.126(6) 0.134(5) 0.074(4) -0.030(3) 0.006(3) -0.049(4)
 C29C 0.100(4) 0.141(5) 0.072(3) -0.031(3) 0.017(3) -0.058(4)
 C15A 0.061(6) 0.076(11) 0.077(8) 0.025(7) 0.008(5) -0.007(6)
 C13A 0.049(4) 0.058(6) 0.069(6) -0.002(4) -0.002(4) -0.013(4)
 C14A 0.061(5) 0.085(11) 0.066(7) 0.022(6) -0.003(5) -0.014(6)
 C30C 0.103(4) 0.174(7) 0.083(4) -0.046(4) 0.029(3) -0.067(5)
 C12A 0.061(6) 0.150(12) 0.068(8) -0.045(8) 0.017(6) -0.033(7)
 C11A 0.082(9) 0.182(15) 0.075(10) -0.062(10) 0.018(7) -0.052(9)
 C19C 0.043(4) 0.057(6) 0.052(6) 0.004(4) 0.005(4) -0.012(4)
 C10C 0.066(6) 0.089(8) 0.045(6) -0.010(5) 0.000(5) -0.019(6)
 C15C 0.057(6) 0.077(9) 0.057(9) -0.021(6) -0.001(5) -0.019(5)
 C14C 0.062(7) 0.084(9) 0.062(8) -0.004(6) -0.002(6) -0.014(6)
 C13C 0.068(6) 0.068(5) 0.055(5) -0.006(4) 0.009(4) -0.018(4)
 C11C 0.070(6) 0.087(7) 0.058(6) 0.007(5) 0.014(5) -0.008(5)
 C12C 0.065(6) 0.089(7) 0.067(6) 0.003(5) 0.017(5) -0.009(4)
 O1C 0.065(4) 0.077(4) 0.070(4) -0.013(3) 0.013(3) -0.019(3)
 C16C 0.047(5) 0.068(6) 0.058(5) -0.004(4) 0.002(4) -0.016(5)
 C17C 0.068(6) 0.078(8) 0.065(8) -0.012(6) 0.017(5) -0.034(6)
 C18C 0.061(6) 0.080(6) 0.060(7) -0.014(6) 0.011(5) -0.034(5)
 C20C 0.045(4) 0.081(7) 0.063(6) -0.015(5) 0.007(4) -0.018(4)
 C21C 0.053(5) 0.075(7) 0.065(5) -0.015(5) 0.003(4) -0.019(4)
 F5 0.0783(18) 0.111(2) 0.0824(19) -0.0082(16) -0.0051(14) -0.0250(16)
 F7 0.089(2) 0.129(3) 0.0690(17) -0.0263(17) -0.0144(15) -0.0033(18)
 F6 0.132(3) 0.142(3) 0.0755(19) -0.0245(19) 0.0047(19) -0.069(3)
 F8 0.178(4) 0.097(2) 0.119(3) -0.012(2) -0.076(3) -0.019(2)
 B2 0.099(5) 0.082(4) 0.083(4) -0.022(3) -0.039(4) -0.001(3)
 F12A 0.111(7) 0.128(7) 0.105(6) -0.035(5) 0.006(5) -0.061(6)
 F9A 0.083(6) 0.42(2) 0.196(14) -0.216(15) -0.045(7) 0.026(8)
 F10A 0.180(10) 0.107(6) 0.150(10) -0.027(6) 0.016(8) -0.061(6)
 F11A 0.089(5) 0.226(12) 0.101(5) -0.045(6) 0.009(4) -0.073(6)
 B3A 0.080(8) 0.161(12) 0.097(8) -0.053(8) 0.005(7) -0.047(7)
 N1S1 0.077(3) 0.100(3) 0.134(5) -0.016(3) 0.011(3) -0.025(3)
 C1S1 0.085(4) 0.090(4) 0.096(4) -0.014(3) 0.008(3) -0.032(3)
 C2S1 0.094(4) 0.120(5) 0.192(9) -0.051(5) 0.036(5) -0.043(4)
 N1S2 0.087(9) 0.073(11) 0.066(7) -0.003(6) 0.003(5) -0.001(8)
 C1S2 0.078(9) 0.074(9) 0.070(7) -0.003(5) 0.006(5) -0.022(8)
 C2S2 0.124(12) 0.109(8) 0.086(7) -0.023(6) 0.025(7) -0.048(8)
 C10F 0.063(6) 0.102(10) 0.053(9) 0.009(8) 0.003(5) -0.031(6)
 C15F 0.074(9) 0.081(10) 0.052(8) -0.009(6) 0.017(6) -0.022(6)
 C14F 0.058(6) 0.069(8) 0.056(8) -0.011(6) 0.008(5) -0.013(5)
 C13F 0.068(7) 0.082(7) 0.062(7) 0.007(5) 0.021(5) -0.022(5)
 C11F 0.071(7) 0.111(11) 0.084(10) 0.027(8) 0.012(7) -0.008(6)
 C12F 0.073(7) 0.111(9) 0.087(10) 0.027(7) 0.033(7) 0.000(6)
 C19F 0.066(7) 0.070(8) 0.062(7) 0.015(5) 0.011(6) -0.020(6)
 O1F 0.084(7) 0.076(5) 0.080(6) 0.021(4) 0.041(5) 0.007(5)
 C16F 0.058(6) 0.067(8) 0.067(8) 0.012(5) 0.022(5) -0.010(5)
 C17F 0.064(6) 0.071(6) 0.078(8) 0.007(5) 0.018(5) -0.018(5)
 C18F 0.063(5) 0.068(6) 0.068(8) -0.001(6) 0.011(5) -0.020(4)
 C20F 0.054(5) 0.099(9) 0.064(6) 0.008(6) 0.009(4) -0.022(6)
 C21F 0.068(7) 0.087(8) 0.062(5) 0.003(5) 0.008(5) -0.017(6)
 O1D 0.058(5) 0.152(15) 0.093(9) 0.054(10) 0.024(5) -0.006(7)
 C19D 0.050(9) 0.126(11) 0.031(6) 0.024(8) -0.006(5) -0.019(9)
 C20D 0.042(7) 0.126(11) 0.046(8) 0.022(8) -0.006(5) -0.012(8)
 C18D 0.065(8) 0.107(12) 0.062(8) 0.008(8) 0.011(6) -0.030(8)
 C16D 0.054(7) 0.115(12) 0.066(8) 0.026(8) -0.002(6) -0.014(7)
 C17D 0.057(7) 0.125(13) 0.057(8) 0.024(9) 0.012(6) -0.014(9)
 C21D 0.056(7) 0.129(11) 0.058(9) 0.017(8) 0.003(6) -0.019(8)
 C13D 0.060(6) 0.105(14) 0.066(7) 0.019(8) 0.021(5) -0.007(7)
 C10D 0.058(6) 0.084(16) 0.069(7) -0.010(8) 0.012(5) -0.001(6)
 C15D 0.065(5) 0.072(11) 0.060(6) 0.014(6) 0.013(4) -0.013(6)
 C14D 0.062(5) 0.074(9) 0.060(6) 0.004(6) 0.009(4) -0.011(6)
 C12D 0.062(7) 0.28(4) 0.063(7) -0.026(14) 0.025(5) -0.021(12)
 C11D 0.057(7) 0.28(4) 0.059(7) -0.048(12) 0.021(6) -0.020(11)
 B1A 0.090(8) 0.097(10) 0.137(10) -0.003(6) -0.028(7) -0.007(7)
 F3A 0.110(8) 0.143(7) 0.176(10) -0.063(7) 0.021(7) -0.002(6)
 F4A 0.140(11) 0.115(8) 0.195(13) 0.022(9) -0.093(11) -0.029(7)
 F1A 0.090(6) 0.075(4) 0.090(6) -0.011(4) -0.018(4) -0.016(3)
 F2A 0.093(7) 0.093(5) 0.223(14) -0.016(6) -0.019(8) -0.012(5)
 B1B 0.109(11) 0.082(9) 0.166(12) -0.002(9) -0.032(9) -0.029(9)
 F3B 0.140(11) 0.113(8) 0.27(3) -0.040(13) 0.020(17) -0.005(8)
 F4B 0.145(11) 0.121(10) 0.168(10) 0.031(8) -0.050(9) -0.066(8)
 F1B 0.101(8) 0.122(11) 0.122(10) -0.047(8) 0.004(7) -0.038(6)
 F2B 0.086(8) 0.086(6) 0.153(9) 0.003(6) -0.004(6) -0.024(5)
 F12B 0.204(15) 0.25(2) 0.089(6) -0.068(10) 0.003(8) -0.095(14)
 B3B 0.101(9) 0.146(12) 0.075(7) -0.026(6) -0.022(8) -0.049(8)
 F9B 0.077(5) 0.257(13) 0.058(4) -0.015(6) -0.001(3) -0.074(6)
 F10B 0.069(4) 0.184(9) 0.171(12) -0.076(9) 0.014(6) -0.047(5)
 F11B 0.203(17) 0.132(7) 0.098(6) -0.028(5) 0.017(8) -0.044(8)
 B4A 0.095(6) 0.071(5) 0.060(5) 0.003(4) 0.018(4) -0.022(4)
 F13A 0.078(4) 0.086(5) 0.073(4) 0.002(3) 0.020(3) -0.022(3)
 F14A 0.079(3) 0.070(3) 0.076(4) 0.005(3) 0.017(3) -0.023(3)
 F15A 0.105(5) 0.081(4) 0.117(5) -0.015(3) 0.019(4) -0.031(3)
 F16A 0.095(4) 0.141(7) 0.060(3) -0.004(3) 0.015(2) -0.029(4)
 B4B 0.143(15) 0.146(17) 0.128(15) 0.027(11) 0.035(11) -0.063(13)
 F13B 0.163(13) 0.073(8) 0.172(15) 0.007(7) 0.083(12) -0.019(7)
 F14B 0.178(14) 0.094(9) 0.094(9) -0.016(6) 0.043(8) -0.006(9)
 F15B 0.099(9) 0.148(11) 0.26(3) 0.112(14) 0.003(14) -0.029(8)
 F16B 0.180(15) 0.30(3) 0.092(8) -0.018(12) 0.045(9) -0.048(16)
 N1T2 0.10(2) 0.08(2) 0.092(18) 0.007(12) -0.007(12) 0.010(14)
 C1T2 0.09(2) 0.076(15) 0.068(13) 0.011(9) -0.006(12) -0.018(16)
 C2T2 0.18(4) 0.104(17) 0.072(10) -0.011(10) -0.028(14) -0.06(2)

_geom_special_details
;
 All esds (except the esd in the dihedral angle between two l.s. planes)
 are estimated using the full covariance matrix.  The cell esds are taken
 into account individually in the estimation of esds in distances, angles
 and torsion angles; correlations between esds in cell parameters are only
 used when they are defined by crystal symmetry.  An approximate (isotropic)
 treatment of cell esds is used for estimating esds involving l.s. planes.
;
loop_
  _geom_bond_atom_site_label_1
  _geom_bond_atom_site_label_2
  _geom_bond_distance
  _geom_bond_site_symmetry_2
  _geom_bond_publ_flag
 Co2 N6A 2.101(4) . ?
 Co2 N6B 2.110(4) . ?
 Co2 N5B 2.178(4) . ?
 Co2 N5C 2.185(4) . ?
 Co2 N5A 2.201(4) . ?
 Co2 N6C 2.124(4) . ?
 Co1 N3B 2.086(4) . ?
 Co1 N3A 2.126(4) . ?
 Co1 N4B 2.187(4) . ?
 Co1 N4C 2.171(4) . ?
 Co1 N3C 2.130(4) . ?
 Co1 N4A 2.191(4) . ?
 N7A C25A 1.373(6) . ?
 N7A C28A 1.424(6) . ?
 N7A C24A 1.367(6) . ?
 O1B C13B 1.395(6) . ?
 O1B C16B 1.398(5) . ?
 N6A C25A 1.299(6) . ?
 N6A C23A 1.389(6) . ?
 N6B C23B 1.383(6) . ?
 N6B C25B 1.313(5) . ?
 N2B C3B 1.430(6) . ?
 N2B C6B 1.373(6) . ?
 N2B C7B 1.362(6) . ?
 N7B C28B 1.435(5) . ?
 N7B C25B 1.362(6) . ?
 N7B C24B 1.367(5) . ?
 N7C C24C 1.377(6) . ?
 N7C C28C 1.430(6) . ?
 N7C C25C 1.364(6) . ?
 N3B C8B 1.374(6) . ?
 N3B C6B 1.305(6) . ?
 N5B C22B 1.273(6) . ?
 N5B C19B 1.437(5) . ?
 N5C C22C 1.273(6) . ?
 N5C C19C 1.462(10) . ?
 N5C C19F 1.421(11) . ?
 N2A C3A 1.425(6) . ?
 N2A C6A 1.379(6) . ?
 N2A C7A 1.377(6) . ?
 N5A C19A 1.431(11) . ?
 N5A C22A 1.283(7) . ?
 N5A C19D 1.474(11) . ?
 N6C C23C 1.391(6) . ?
 N6C C25C 1.305(6) . ?
 N3A C6A 1.300(6) . ?
 N3A C8A 1.384(6) . ?
 N4B C9B 1.300(6) . ?
 N4B C10B 1.434(6) . ?
 N4C C9C 1.274(6) . ?
 N4C C10C 1.463(11) . ?
 N4C C10F 1.420(11) . ?
 N3C C8C 1.387(7) . ?
 N3C C6C 1.300(7) . ?
 N1A C1A 1.346(7) . ?
 N1A C5A 1.354(8) . ?
 N8A C30A 1.327(6) . ?
 N8A C26A 1.320(7) . ?
 N4A C9A 1.271(7) . ?
 N4A C10A 1.470(11) . ?
 N4A C10D 1.434(12) . ?
 N1B C1B 1.331(8) . ?
 N1B C5B 1.336(8) . ?
 N8B C26B 1.294(7) . ?
 N8B C30B 1.349(8) . ?
 N2C C6C 1.330(7) . ?
 N2C C7C 1.376(8) . ?
 N2C C3C 1.452(8) . ?
 N2C C3F 1.570(13) . ?
 C25A H25A 0.9500 . ?
 C3B C2B 1.371(7) . ?
 C3B C4B 1.369(7) . ?
 C28B C27B 1.385(7) . ?
 C28B C29B 1.367(7) . ?
 O1A C16A 1.398(11) . ?
 O1A C13A 1.394(10) . ?
 C23B C22B 1.439(6) . ?
 C23B C24B 1.373(6) . ?
 C3A C2A 1.384(7) . ?
 C3A C4A 1.383(7) . ?
 C23A C24A 1.359(7) . ?
 C23A C22A 1.433(7) . ?
 C22B H22B 0.9500 . ?
 C2A H2A 0.9500 . ?
 C2A C1A 1.384(7) . ?
 C25B H25B 0.9500 . ?
 N8C C26C 1.310(9) . ?
 N8C C30C 1.318(9) . ?
 C8B C9B 1.446(6) . ?
 C8B C7B 1.365(7) . ?
 C6B H6B 0.9500 . ?
 C24B H24B 0.9500 . ?
 C28A C29A 1.373(7) . ?
 C28A C27A 1.377(7) . ?
 C9B H9B 0.9500 . ?
 C10B C11B 1.385(7) . ?
 C10B C15B 1.380(7) . ?
 C22C H22C 0.9500 . ?
 C22C C23C 1.448(7) . ?
 C19B C18B 1.375(6) . ?
 C19B C20B 1.384(6) . ?
 C1A H1A 0.9500 . ?
 C24C H24C 0.9500 . ?
 C24C C23C 1.357(6) . ?
 C13B C12B 1.368(7) . ?
 C13B C14B 1.378(7) . ?
 C29A H29A 0.9500 . ?
 C29A C30A 1.368(7) . ?
 C27B H27B 0.9500 . ?
 C27B C26B 1.393(7) . ?
 C11B H11B 0.9500 . ?
 C11B C12B 1.389(6) . ?
 C7B H7B 0.9500 . ?
 C24A H24A 0.9500 . ?
 C6A H6A 0.9500 . ?
 C19A C20A 1.383(11) . ?
 C19A C18A 1.385(11) . ?
 C8A C7A 1.346(7) . ?
 C8A C9A 1.456(7) . ?
 C7A H7A 0.9500 . ?
 C28C C27C 1.362(8) . ?
 C28C C29C 1.372(8) . ?
 C16B C17B 1.373(6) . ?
 C16B C21B 1.369(6) . ?
 C30A H30A 0.9500 . ?
 C22A H22A 0.9500 . ?
 C25C H25C 0.9500 . ?
 C9A H9A 0.9500 . ?
 C17B H17B 0.9500 . ?
 C17B C18B 1.391(6) . ?
 C12B H12B 0.9500 . ?
 C2B H2B 0.9500 . ?
 C2B C1B 1.399(7) . ?
 C4A H4A 0.9500 . ?
 C4A C5A 1.377(8) . ?
 C14B H14B 0.9500 . ?
 C14B C15B 1.383(7) . ?
 C4B H4B 0.9500 . ?
 C4B C5B 1.369(7) . ?
 C29B H29B 0.9500 . ?
 C29B C30B 1.379(7) . ?
 C8C C7C 1.369(8) . ?
 C8C C9C 1.441(8) . ?
 C15B H15B 0.9500 . ?
 C18B H18B 0.9500 . ?
 C20A H20A 0.9500 . ?
 C20A C21A 1.375(11) . ?
 C10A C15A 1.362(11) . ?
 C10A C11A 1.368(11) . ?
 C5A H5A 0.9500 . ?
 C1B H1B 0.9500 . ?
 C26B H26B 0.9500 . ?
 C6C H6C 0.9500 . ?
 C30B H30B 0.9500 . ?
 C27C H27C 0.9500 . ?
 C27C C26C 1.390(8) . ?
 C18A H18A 0.9500 . ?
 C18A C17A 1.372(11) . ?
 C20B H20B 0.9500 . ?
 C20B C21B 1.387(7) . ?
 C7C H7C 0.9500 . ?
 C9C H9C 0.9500 . ?
 C16A C17A 1.392(11) . ?
 C16A C21A 1.375(11) . ?
 C5B H5B 0.9500 . ?
 C26A H26A 0.9500 . ?
 C26A C27A 1.395(8) . ?
 C27A H27A 0.9500 . ?
 C21B H21B 0.9500 . ?
 C17A H17A 0.9500 . ?
 C21A H21A 0.9500 . ?
 C26C H26C 0.9500 . ?
 C29C H29C 0.9500 . ?
 C29C C30C 1.379(8) . ?
 C15A H15A 0.9500 . ?
 C15A C14A 1.376(11) . ?
 C13A C14A 1.364(11) . ?
 C13A C12A 1.345(11) . ?
 C14A H14A 0.9500 . ?
 C30C H30C 0.9500 . ?
 C3C C2C 1.384(8) . ?
 C3C C4C 1.384(9) . ?
 C2C H2C 0.9500 . ?
 C2C C1C 1.394(9) . ?
 N1C C1C 1.337(10) . ?
 N1C C5C 1.326(10) . ?
 C12A H12A 0.9500 . ?
 C12A C11A 1.372(11) . ?
 C1C H1C 0.9500 . ?
 C4C H4C 0.9500 . ?
 C4C C5C 1.396(10) . ?
 C11A H11A 0.9500 . ?
 C5C H5C 0.9500 . ?
 C19C C18C 1.399(10) . ?
 C19C C20C 1.388(11) . ?
 C10C C15C 1.397(11) . ?
 C10C C11C 1.382(12) . ?
 C15C H15C 0.9500 . ?
 C15C C14C 1.388(12) . ?
 C14C H14C 0.9500 . ?
 C14C C13C 1.372(12) . ?
 C13C C12C 1.383(10) . ?
 C13C O1C 1.394(10) . ?
 C11C H11C 0.9500 . ?
 C11C C12C 1.387(11) . ?
 C12C H12C 0.9500 . ?
 O1C C16C 1.419(11) . ?
 C16C C17C 1.381(11) . ?
 C16C C21C 1.379(10) . ?
 C17C H17C 0.9500 . ?
 C17C C18C 1.366(11) . ?
 C18C H18C 0.9500 . ?
 C20C H20C 0.9500 . ?
 C20C C21C 1.393(10) . ?
 C21C H21C 0.9500 . ?
 F5 B2 1.408(8) . ?
 F7 B2 1.400(7) . ?
 F6 B2 1.407(9) . ?
 F8 B2 1.364(7) . ?
 F12A B3A 1.358(12) . ?
 F9A B3A 1.346(12) . ?
 F10A B3A 1.345(12) . ?
 F11A B3A 1.369(12) . ?
 N1S1 C1S1 1.109(7) . ?
 C1S1 C2S1 1.466(10) . ?
 C2S1 H2SA 0.9800 . ?
 C2S1 H2SB 0.9800 . ?
 C2S1 H2SC 0.9800 . ?
 O1ET C2ET 1.303(11) . ?
 O1ET C3ET 1.431(10) . ?
 C1ET C2ET 1.497(12) . ?
 C3ET C4ET 1.477(12) . ?
 N1S2 C1S2 1.156(12) . ?
 C1S2 C2S2 1.455(10) . ?
 C2S2 H2SD 0.9800 . ?
 C2S2 H2SE 0.9800 . ?
 C2S2 H2SF 0.9800 . ?
 C10F C15F 1.380(12) . ?
 C10F C11F 1.371(12) . ?
 C15F H15F 0.9500 . ?
 C15F C14F 1.378(11) . ?
 C14F H14F 0.9500 . ?
 C14F C13F 1.379(11) . ?
 C13F C12F 1.379(11) . ?
 C13F O1F 1.379(10) . ?
 C11F H11F 0.9500 . ?
 C11F C12F 1.371(11) . ?
 C12F H12F 0.9500 . ?
 C19F C18F 1.371(11) . ?
 C19F C20F 1.389(12) . ?
 O1F C16F 1.422(11) . ?
 C16F C17F 1.368(12) . ?
 C16F C21F 1.366(11) . ?
 C17F H17F 0.9500 . ?
 C17F C18F 1.367(11) . ?
 C18F H18F 0.9500 . ?
 C20F H20F 0.9500 . ?
 C20F C21F 1.381(11) . ?
 C21F H21F 0.9500 . ?
 O1D C16D 1.406(12) . ?
 O1D C13D 1.390(12) . ?
 C19D C20D 1.386(12) . ?
 C19D C18D 1.394(12) . ?
 C20D H20D 0.9500 . ?
 C20D C21D 1.395(12) . ?
 C18D H18D 0.9500 . ?
 C18D C17D 1.385(12) . ?
 C16D C17D 1.375(12) . ?
 C16D C21D 1.373(12) . ?
 C17D H17D 0.9500 . ?
 C21D H21D 0.9500 . ?
 C13D C14D 1.351(11) . ?
 C13D C12D 1.330(12) . ?
 C10D C15D 1.348(12) . ?
 C10D C11D 1.349(12) . ?
 C15D H15D 0.9500 . ?
 C15D C14D 1.354(11) . ?
 C14D H14D 0.9500 . ?
 C12D H12D 0.9500 . ?
 C12D C11D 1.369(12) . ?
 C11D H11D 0.9500 . ?
 B1A F3A 1.4020 . ?
 B1A F4A 1.4025 . ?
 B1A F1A 1.4038 . ?
 B1A F2A 1.4018 . ?
 B1B F3B 1.4023 . ?
 B1B F4B 1.4020 . ?
 B1B F1B 1.4016 . ?
 B1B F2B 1.4024 . ?
 F12B B3B 1.346(11) . ?
 B3B F9B 1.351(12) . ?
 B3B F10B 1.347(12) . ?
 B3B F11B 1.372(12) . ?
 B4A F13A 1.4026 . ?
 B4A F14A 1.4023 . ?
 B4A F15A 1.4021 . ?
 B4A F16A 1.4023 . ?
 B4B F13B 1.4024 . ?
 B4B F14B 1.4030 . ?
 B4B F15B 1.4026 . ?
 B4B F16B 1.4015 . ?
 C3F C2F 1.390(13) . ?
 C3F C4F 1.379(13) . ?
 C2F H2F 0.9500 . ?
 C2F C1F 1.395(14) . ?
 N1F C1F 1.318(15) . ?
 N1F C5F 1.324(16) . ?
 C1F H1F 0.9500 . ?
 C4F H4F 0.9500 . ?
 C4F C5F 1.383(14) . ?
 C5F H5F 0.9500 . ?
 C7 C11 1.5194 . ?
 C11 O4 1.4215 . ?
 O4 C12 1.4199 . ?
 C12 C13 1.5205 . ?
 N1T2 C1T2 1.160(14) . ?
 C1T2 C2T2 1.458(13) . ?
 C2T2 H2TA 0.9800 . ?
 C2T2 H2TB 0.9800 . ?
 C2T2 H2TC 0.9800 . ?
 N1S3 C1S3 1.1622 . ?
 C1S3 C2S3 1.4535 . ?
 O1EU C2EU 1.384(13) . ?
 O1EU C3EU 1.421(13) . ?
 C2EU C1EU 1.510(14) . ?
 C3EU C4EU 1.500(13) . ?
 N1S4 C1S4 1.1628 . ?
 C1S4 C2S4 1.4531 . ?
 C2S4 H2SG 0.9800 . ?
 C2S4 H2SH 0.9800 . ?
 C2S4 H2SI 0.9800 . ?
 N1T4 C1T4 1.1622 . ?
 C1T4 C2T4 1.4540 . ?
 C2T4 H2TD 0.9800 . ?
 C2T4 H2TE 0.9800 . ?
 C2T4 H2TF 0.9800 . ?

loop_
  _geom_angle_atom_site_label_1
  _geom_angle_atom_site_label_2
  _geom_angle_atom_site_label_3
  _geom_angle
  _geom_angle_site_symmetry_1
  _geom_angle_site_symmetry_3
  _geom_angle_publ_flag
 N6A Co2 N6B 102.55(14) . . ?
 N6A Co2 N5B 173.54(14) . . ?
 N6A Co2 N5C 90.89(14) . . ?
 N6A Co2 N5A 77.02(15) . . ?
 N6A Co2 N6C 93.49(14) . . ?
 N6B Co2 N5B 77.59(14) . . ?
 N6B Co2 N5C 162.91(15) . . ?
 N6B Co2 N5A 90.93(15) . . ?
 N6B Co2 N6C 90.96(14) . . ?
 N5B Co2 N5C 90.26(14) . . ?
 N5B Co2 N5A 96.52(15) . . ?
 N5C Co2 N5A 102.47(14) . . ?
 N6C Co2 N5B 92.97(14) . . ?
 N6C Co2 N5C 77.57(14) . . ?
 N6C Co2 N5A 170.51(15) . . ?
 N3B Co1 N3A 94.98(14) . . ?
 N3B Co1 N4B 78.01(15) . . ?
 N3B Co1 N4C 96.75(15) . . ?
 N3B Co1 N3C 94.38(15) . . ?
 N3B Co1 N4A 172.51(16) . . ?
 N3A Co1 N4B 93.57(15) . . ?
 N3A Co1 N4C 167.32(15) . . ?
 N3A Co1 N3C 95.77(15) . . ?
 N3A Co1 N4A 77.53(16) . . ?
 N4B Co1 N4A 101.86(16) . . ?
 N4C Co1 N4B 93.53(14) . . ?
 N4C Co1 N4A 90.74(17) . . ?
 N3C Co1 N4B 168.44(16) . . ?
 N3C Co1 N4C 78.60(14) . . ?
 N3C Co1 N4A 86.82(16) . . ?
 C25A N7A C28A 126.6(4) . . ?
 C24A N7A C25A 107.0(4) . . ?
 C24A N7A C28A 126.2(4) . . ?
 C13B O1B C16B 116.8(3) . . ?
 C25A N6A Co2 140.3(3) . . ?
 C25A N6A C23A 105.9(4) . . ?
 C23A N6A Co2 113.2(3) . . ?
 C23B N6B Co2 112.2(3) . . ?
 C25B N6B Co2 141.8(3) . . ?
 C25B N6B C23B 106.0(4) . . ?
 C6B N2B C3B 125.8(4) . . ?
 C7B N2B C3B 126.3(4) . . ?
 C7B N2B C6B 107.9(4) . . ?
 C25B N7B C28B 125.5(4) . . ?
 C25B N7B C24B 107.7(3) . . ?
 C24B N7B C28B 126.6(4) . . ?
 C24C N7C C28C 126.1(4) . . ?
 C25C N7C C24C 107.3(4) . . ?
 C25C N7C C28C 126.6(4) . . ?
 C8B N3B Co1 113.3(3) . . ?
 C6B N3B Co1 140.4(3) . . ?
 C6B N3B C8B 106.4(4) . . ?
 C22B N5B Co2 113.8(3) . . ?
 C22B N5B C19B 117.8(4) . . ?
 C19B N5B Co2 128.2(3) . . ?
 C22C N5C Co2 114.0(3) . . ?
 C22C N5C C19C 122.1(7) . . ?
 C22C N5C C19F 113.2(8) . . ?
 C19C N5C Co2 123.9(6) . . ?
 C19F N5C Co2 130.3(7) . . ?
 C6A N2A C3A 126.2(4) . . ?
 C7A N2A C3A 127.2(4) . . ?
 C7A N2A C6A 106.5(4) . . ?
 C19A N5A Co2 133.0(10) . . ?
 C22A N5A Co2 114.2(3) . . ?
 C22A N5A C19A 112.6(10) . . ?
 C22A N5A C19D 123.4(12) . . ?
 C19D N5A Co2 122.4(11) . . ?
 C23C N6C Co2 111.9(3) . . ?
 C25C N6C Co2 141.8(3) . . ?
 C25C N6C C23C 106.3(4) . . ?
 C6A N3A Co1 141.7(3) . . ?
 C6A N3A C8A 106.0(4) . . ?
 C8A N3A Co1 112.2(3) . . ?
 C9B N4B Co1 113.2(3) . . ?
 C9B N4B C10B 117.6(4) . . ?
 C10B N4B Co1 128.7(3) . . ?
 C9C N4C Co1 113.5(3) . . ?
 C9C N4C C10C 111.9(12) . . ?
 C9C N4C C10F 123.1(13) . . ?
 C10C N4C Co1 134.3(11) . . ?
 C10F N4C Co1 123.0(13) . . ?
 C8C N3C Co1 109.9(3) . . ?
 C6C N3C Co1 141.6(4) . . ?
 C6C N3C C8C 108.2(4) . . ?
 C1A N1A C5A 116.0(4) . . ?
 C26A N8A C30A 116.1(5) . . ?
 C9A N4A Co1 113.6(3) . . ?
 C9A N4A C10A 123.0(10) . . ?
 C9A N4A C10D 108.8(12) . . ?
 C10A N4A Co1 122.5(9) . . ?
 C10D N4A Co1 137.6(12) . . ?
 C1B N1B C5B 116.0(5) . . ?
 C26B N8B C30B 116.3(5) . . ?
 C6C N2C C7C 109.5(5) . . ?
 C6C N2C C3C 121.9(5) . . ?
 C6C N2C C3F 149.7(7) . . ?
 C7C N2C C3C 128.5(5) . . ?
 C7C N2C C3F 99.5(7) . . ?
 N7A C25A H25A 124.4 . . ?
 N6A C25A N7A 111.3(4) . . ?
 N6A C25A H25A 124.4 . . ?
 C2B C3B N2B 120.9(4) . . ?
 C4B C3B N2B 120.3(4) . . ?
 C4B C3B C2B 118.8(5) . . ?
 C27B C28B N7B 119.6(4) . . ?
 C29B C28B N7B 120.3(4) . . ?
 C29B C28B C27B 120.1(4) . . ?
 C13A O1A C16A 117.1(9) . . ?
 N6B C23B C22B 117.8(4) . . ?
 C24B C23B N6B 109.5(4) . . ?
 C24B C23B C22B 132.5(4) . . ?
 C2A C3A N2A 120.3(4) . . ?
 C4A C3A N2A 120.1(4) . . ?
 C4A C3A C2A 119.6(4) . . ?
 N6A C23A C22A 118.1(4) . . ?
 C24A C23A N6A 109.6(4) . . ?
 C24A C23A C22A 132.2(5) . . ?
 N5B C22B C23B 118.2(4) . . ?
 N5B C22B H22B 120.9 . . ?
 C23B C22B H22B 120.9 . . ?
 C3A C2A H2A 121.0 . . ?
 C3A C2A C1A 118.0(5) . . ?
 C1A C2A H2A 121.0 . . ?
 N6B C25B N7B 111.1(4) . . ?
 N6B C25B H25B 124.5 . . ?
 N7B C25B H25B 124.5 . . ?
 C26C N8C C30C 115.4(5) . . ?
 N3B C8B C9B 118.2(4) . . ?
 C7B C8B N3B 110.1(4) . . ?
 C7B C8B C9B 131.7(4) . . ?
 N2B C6B H6B 124.9 . . ?
 N3B C6B N2B 110.3(4) . . ?
 N3B C6B H6B 124.9 . . ?
 N7B C24B C23B 105.7(4) . . ?
 N7B C24B H24B 127.1 . . ?
 C23B C24B H24B 127.1 . . ?
 C29A C28A N7A 121.6(4) . . ?
 C29A C28A C27A 118.3(5) . . ?
 C27A C28A N7A 120.0(4) . . ?
 N4B C9B C8B 117.2(4) . . ?
 N4B C9B H9B 121.4 . . ?
 C8B C9B H9B 121.4 . . ?
 C11B C10B N4B 121.9(4) . . ?
 C15B C10B N4B 118.4(4) . . ?
 C15B C10B C11B 119.6(5) . . ?
 N5C C22C H22C 120.9 . . ?
 N5C C22C C23C 118.1(4) . . ?
 C23C C22C H22C 120.9 . . ?
 C18B C19B N5B 120.1(4) . . ?
 C18B C19B C20B 119.3(4) . . ?
 C20B C19B N5B 120.5(4) . . ?
 N1A C1A C2A 124.1(5) . . ?
 N1A C1A H1A 118.0 . . ?
 C2A C1A H1A 118.0 . . ?
 N7C C24C H24C 127.0 . . ?
 C23C C24C N7C 106.1(4) . . ?
 C23C C24C H24C 127.0 . . ?
 N6C C23C C22C 117.8(4) . . ?
 C24C C23C N6C 109.4(4) . . ?
 C24C C23C C22C 132.8(4) . . ?
 C12B C13B O1B 121.1(5) . . ?
 C12B C13B C14B 120.8(5) . . ?
 C14B C13B O1B 118.0(5) . . ?
 C28A C29A H29A 120.4 . . ?
 C30A C29A C28A 119.2(5) . . ?
 C30A C29A H29A 120.4 . . ?
 C28B C27B H27B 121.7 . . ?
 C28B C27B C26B 116.6(5) . . ?
 C26B C27B H27B 121.7 . . ?
 C10B C11B H11B 120.1 . . ?
 C10B C11B C12B 119.9(5) . . ?
 C12B C11B H11B 120.1 . . ?
 N2B C7B C8B 105.3(4) . . ?
 N2B C7B H7B 127.3 . . ?
 C8B C7B H7B 127.3 . . ?
 N7A C24A H24A 126.9 . . ?
 C23A C24A N7A 106.2(4) . . ?
 C23A C24A H24A 126.9 . . ?
 N2A C6A H6A 124.5 . . ?
 N3A C6A N2A 111.0(4) . . ?
 N3A C6A H6A 124.5 . . ?
 C20A C19A N5A 117.0(10) . . ?
 C20A C19A C18A 122.7(10) . . ?
 C18A C19A N5A 120.3(11) . . ?
 N3A C8A C9A 117.4(5) . . ?
 C7A C8A N3A 110.2(4) . . ?
 C7A C8A C9A 132.3(5) . . ?
 N2A C7A H7A 126.9 . . ?
 C8A C7A N2A 106.2(4) . . ?
 C8A C7A H7A 126.9 . . ?
 C27C C28C N7C 120.7(5) . . ?
 C27C C28C C29C 119.0(5) . . ?
 C29C C28C N7C 120.3(5) . . ?
 C17B C16B O1B 123.8(4) . . ?
 C21B C16B O1B 115.9(4) . . ?
 C21B C16B C17B 120.3(4) . . ?
 N8A C30A C29A 124.2(5) . . ?
 N8A C30A H30A 117.9 . . ?
 C29A C30A H30A 117.9 . . ?
 N5A C22A C23A 117.5(4) . . ?
 N5A C22A H22A 121.3 . . ?
 C23A C22A H22A 121.3 . . ?
 N7C C25C H25C 124.5 . . ?
 N6C C25C N7C 111.0(4) . . ?
 N6C C25C H25C 124.5 . . ?
 N4A C9A C8A 118.6(5) . . ?
 N4A C9A H9A 120.7 . . ?
 C8A C9A H9A 120.7 . . ?
 C16B C17B H17B 120.3 . . ?
 C16B C17B C18B 119.4(4) . . ?
 C18B C17B H17B 120.3 . . ?
 C13B C12B C11B 119.8(5) . . ?
 C13B C12B H12B 120.1 . . ?
 C11B C12B H12B 120.1 . . ?
 C3B C2B H2B 120.9 . . ?
 C3B C2B C1B 118.2(5) . . ?
 C1B C2B H2B 120.9 . . ?
 C3A C4A H4A 120.9 . . ?
 C5A C4A C3A 118.2(5) . . ?
 C5A C4A H4A 120.9 . . ?
 C13B C14B H14B 120.3 . . ?
 C13B C14B C15B 119.4(5) . . ?
 C15B C14B H14B 120.3 . . ?
 C3B C4B H4B 120.5 . . ?
 C3B C4B C5B 118.9(5) . . ?
 C5B C4B H4B 120.5 . . ?
 C28B C29B H29B 121.2 . . ?
 C28B C29B C30B 117.6(5) . . ?
 C30B C29B H29B 121.2 . . ?
 N3C C8C C9C 119.5(5) . . ?
 C7C C8C N3C 107.7(5) . . ?
 C7C C8C C9C 132.8(5) . . ?
 C10B C15B C14B 120.4(5) . . ?
 C10B C15B H15B 119.8 . . ?
 C14B C15B H15B 119.8 . . ?
 C19B C18B C17B 120.7(4) . . ?
 C19B C18B H18B 119.7 . . ?
 C17B C18B H18B 119.7 . . ?
 C19A C20A H20A 120.3 . . ?
 C21A C20A C19A 119.3(12) . . ?
 C21A C20A H20A 120.3 . . ?
 C15A C10A N4A 124.1(11) . . ?
 C15A C10A C11A 116.4(10) . . ?
 C11A C10A N4A 119.5(11) . . ?
 N1A C5A C4A 124.1(5) . . ?
 N1A C5A H5A 118.0 . . ?
 C4A C5A H5A 118.0 . . ?
 N1B C1B C2B 123.6(5) . . ?
 N1B C1B H1B 118.2 . . ?
 C2B C1B H1B 118.2 . . ?
 N8B C26B C27B 125.4(5) . . ?
 N8B C26B H26B 117.3 . . ?
 C27B C26B H26B 117.3 . . ?
 N3C C6C N2C 109.5(5) . . ?
 N3C C6C H6C 125.2 . . ?
 N2C C6C H6C 125.2 . . ?
 N8B C30B C29B 124.0(5) . . ?
 N8B C30B H30B 118.0 . . ?
 C29B C30B H30B 118.0 . . ?
 C28C C27C H27C 121.2 . . ?
 C28C C27C C26C 117.6(6) . . ?
 C26C C27C H27C 121.2 . . ?
 C19A C18A H18A 121.3 . . ?
 C17A C18A C19A 117.4(10) . . ?
 C17A C18A H18A 121.3 . . ?
 C19B C20B H20B 120.1 . . ?
 C19B C20B C21B 119.8(5) . . ?
 C21B C20B H20B 120.1 . . ?
 N2C C7C H7C 127.5 . . ?
 C8C C7C N2C 105.0(5) . . ?
 C8C C7C H7C 127.5 . . ?
 N4C C9C C8C 118.0(5) . . ?
 N4C C9C H9C 121.0 . . ?
 C8C C9C H9C 121.0 . . ?
 C17A C16A O1A 122.5(9) . . ?
 C21A C16A O1A 115.5(10) . . ?
 C21A C16A C17A 121.9(9) . . ?
 N1B C5B C4B 124.3(6) . . ?
 N1B C5B H5B 117.8 . . ?
 C4B C5B H5B 117.8 . . ?
 N8A C26A H26A 117.8 . . ?
 N8A C26A C27A 124.3(5) . . ?
 C27A C26A H26A 117.8 . . ?
 C28A C27A C26A 117.8(5) . . ?
 C28A C27A H27A 121.1 . . ?
 C26A C27A H27A 121.1 . . ?
 C16B C21B C20B 120.4(5) . . ?
 C16B C21B H21B 119.8 . . ?
 C20B C21B H21B 119.8 . . ?
 C18A C17A C16A 120.0(10) . . ?
 C18A C17A H17A 120.0 . . ?
 C16A C17A H17A 120.0 . . ?
 C20A C21A C16A 118.4(11) . . ?
 C20A C21A H21A 120.8 . . ?
 C16A C21A H21A 120.8 . . ?
 N8C C26C C27C 125.1(6) . . ?
 N8C C26C H26C 117.4 . . ?
 C27C C26C H26C 117.4 . . ?
 C28C C29C H29C 121.1 . . ?
 C28C C29C C30C 117.8(6) . . ?
 C30C C29C H29C 121.1 . . ?
 C10A C15A H15A 119.3 . . ?
 C10A C15A C14A 121.3(11) . . ?
 C14A C15A H15A 119.3 . . ?
 C14A C13A O1A 119.0(9) . . ?
 C12A C13A O1A 122.1(9) . . ?
 C12A C13A C14A 118.8(9) . . ?
 C15A C14A H14A 119.7 . . ?
 C13A C14A C15A 120.5(11) . . ?
 C13A C14A H14A 119.7 . . ?
 N8C C30C C29C 125.0(7) . . ?
 N8C C30C H30C 117.5 . . ?
 C29C C30C H30C 117.5 . . ?
 C2C C3C N2C 120.7(5) . . ?
 C4C C3C N2C 117.2(6) . . ?
 C4C C3C C2C 121.7(6) . . ?
 C3C C2C H2C 121.7 . . ?
 C3C C2C C1C 116.7(6) . . ?
 C1C C2C H2C 121.7 . . ?
 C5C N1C C1C 118.6(8) . . ?
 C13A C12A H12A 120.1 . . ?
 C13A C12A C11A 119.9(11) . . ?
 C11A C12A H12A 120.1 . . ?
 C2C C1C H1C 118.5 . . ?
 N1C C1C C2C 123.1(7) . . ?
 N1C C1C H1C 118.5 . . ?
 C3C C4C H4C 121.8 . . ?
 C3C C4C C5C 116.4(7) . . ?
 C5C C4C H4C 121.8 . . ?
 C10A C11A C12A 122.5(12) . . ?
 C10A C11A H11A 118.8 . . ?
 C12A C11A H11A 118.8 . . ?
 N1C C5C C4C 123.5(9) . . ?
 N1C C5C H5C 118.2 . . ?
 C4C C5C H5C 118.2 . . ?
 C18C C19C N5C 118.7(9) . . ?
 C20C C19C N5C 123.6(8) . . ?
 C20C C19C C18C 117.4(8) . . ?
 C15C C10C N4C 119.4(11) . . ?
 C11C C10C N4C 123.6(11) . . ?
 C11C C10C C15C 117.0(10) . . ?
 C10C C15C H15C 119.8 . . ?
 C14C C15C C10C 120.5(12) . . ?
 C14C C15C H15C 119.8 . . ?
 C15C C14C H14C 119.1 . . ?
 C13C C14C C15C 121.9(12) . . ?
 C13C C14C H14C 119.1 . . ?
 C14C C13C C12C 118.1(10) . . ?
 C14C C13C O1C 120.1(9) . . ?
 C12C C13C O1C 121.8(9) . . ?
 C10C C11C H11C 118.9 . . ?
 C10C C11C C12C 122.3(10) . . ?
 C12C C11C H11C 118.9 . . ?
 C13C C12C C11C 120.2(9) . . ?
 C13C C12C H12C 119.9 . . ?
 C11C C12C H12C 119.9 . . ?
 C13C O1C C16C 114.9(8) . . ?
 C17C C16C O1C 121.8(9) . . ?
 C21C C16C O1C 116.8(8) . . ?
 C21C C16C C17C 121.4(9) . . ?
 C16C C17C H17C 120.6 . . ?
 C18C C17C C16C 118.9(10) . . ?
 C18C C17C H17C 120.6 . . ?
 C19C C18C H18C 118.9 . . ?
 C17C C18C C19C 122.2(10) . . ?
 C17C C18C H18C 118.9 . . ?
 C19C C20C H20C 119.3 . . ?
 C19C C20C C21C 121.3(8) . . ?
 C21C C20C H20C 119.3 . . ?
 C16C C21C C20C 118.7(9) . . ?
 C16C C21C H21C 120.6 . . ?
 C20C C21C H21C 120.6 . . ?
 F7 B2 F5 108.5(6) . . ?
 F7 B2 F6 109.2(5) . . ?
 F6 B2 F5 108.9(5) . . ?
 F8 B2 F5 112.6(5) . . ?
 F8 B2 F7 111.8(5) . . ?
 F8 B2 F6 105.7(7) . . ?
 F12A B3A F11A 109.0(12) . . ?
 F9A B3A F12A 110.4(12) . . ?
 F9A B3A F11A 115.1(13) . . ?
 F10A B3A F12A 111.1(11) . . ?
 F10A B3A F9A 105.9(14) . . ?
 F10A B3A F11A 105.2(11) . . ?
 N1S1 C1S1 C2S1 178.6(8) . . ?
 C1S1 C2S1 H2SA 109.5 . . ?
 C1S1 C2S1 H2SB 109.5 . . ?
 C1S1 C2S1 H2SC 109.5 . . ?
 H2SA C2S1 H2SB 109.5 . . ?
 H2SA C2S1 H2SC 109.5 . . ?
 H2SB C2S1 H2SC 109.5 . . ?
 C2ET O1ET C3ET 117.6(9) . . ?
 O1ET C2ET C1ET 115.9(10) . . ?
 O1ET C3ET C4ET 112.0(9) . . ?
 N1S2 C1S2 C2S2 177(2) . . ?
 C1S2 C2S2 H2SD 109.5 . . ?
 C1S2 C2S2 H2SE 109.5 . . ?
 C1S2 C2S2 H2SF 109.5 . . ?
 H2SD C2S2 H2SE 109.5 . . ?
 H2SD C2S2 H2SF 109.5 . . ?
 H2SE C2S2 H2SF 109.5 . . ?
 C15F C10F N4C 117.8(11) . . ?
 C11F C10F N4C 118.8(11) . . ?
 C11F C10F C15F 123.4(11) . . ?
 C10F C15F H15F 120.9 . . ?
 C14F C15F C10F 118.2(13) . . ?
 C14F C15F H15F 120.9 . . ?
 C15F C14F H14F 120.6 . . ?
 C15F C14F C13F 118.8(12) . . ?
 C13F C14F H14F 120.6 . . ?
 C14F C13F O1F 113.8(9) . . ?
 C12F C13F C14F 122.1(9) . . ?
 C12F C13F O1F 123.9(9) . . ?
 C10F C11F H11F 121.0 . . ?
 C10F C11F C12F 118.0(11) . . ?
 C12F C11F H11F 121.0 . . ?
 C13F C12F H12F 120.2 . . ?
 C11F C12F C13F 119.5(10) . . ?
 C11F C12F H12F 120.2 . . ?
 C18F C19F N5C 127.1(11) . . ?
 C18F C19F C20F 121.3(10) . . ?
 C20F C19F N5C 111.6(10) . . ?
 C13F O1F C16F 116.2(8) . . ?
 C17F C16F O1F 120.4(11) . . ?
 C21F C16F O1F 116.8(12) . . ?
 C21F C16F C17F 122.7(10) . . ?
 C16F C17F H17F 120.2 . . ?
 C18F C17F C16F 119.5(11) . . ?
 C18F C17F H17F 120.2 . . ?
 C19F C18F H18F 120.5 . . ?
 C17F C18F C19F 118.9(11) . . ?
 C17F C18F H18F 120.5 . . ?
 C19F C20F H20F 120.3 . . ?
 C21F C20F C19F 119.5(11) . . ?
 C21F C20F H20F 120.3 . . ?
 C16F C21F C20F 117.9(11) . . ?
 C16F C21F H21F 121.0 . . ?
 C20F C21F H21F 121.0 . . ?
 C13D O1D C16D 116.4(11) . . ?
 C20D C19D N5A 122.3(12) . . ?
 C20D C19D C18D 117.2(11) . . ?
 C18D C19D N5A 120.4(12) . . ?
 C19D C20D H20D 118.8 . . ?
 C19D C20D C21D 122.5(13) . . ?
 C21D C20D H20D 118.8 . . ?
 C19D C18D H18D 119.9 . . ?
 C17D C18D C19D 120.1(13) . . ?
 C17D C18D H18D 119.9 . . ?
 C17D C16D O1D 121.9(12) . . ?
 C21D C16D O1D 118.8(13) . . ?
 C21D C16D C17D 119.3(11) . . ?
 C18D C17D H17D 119.2 . . ?
 C16D C17D C18D 121.6(12) . . ?
 C16D C17D H17D 119.2 . . ?
 C20D C21D H21D 120.4 . . ?
 C16D C21D C20D 119.1(13) . . ?
 C16D C21D H21D 120.4 . . ?
 C14D C13D O1D 116.9(12) . . ?
 C12D C13D O1D 121.8(11) . . ?
 C12D C13D C14D 121.1(11) . . ?
 C15D C10D N4A 117.5(12) . . ?
 C15D C10D C11D 121.0(12) . . ?
 C11D C10D N4A 121.1(12) . . ?
 C10D C15D H15D 120.2 . . ?
 C10D C15D C14D 119.6(12) . . ?
 C14D C15D H15D 120.2 . . ?
 C13D C14D C15D 119.5(12) . . ?
 C13D C14D H14D 120.3 . . ?
 C15D C14D H14D 120.3 . . ?
 C13D C12D H12D 120.0 . . ?
 C13D C12D C11D 119.9(13) . . ?
 C11D C12D H12D 120.0 . . ?
 C10D C11D C12D 118.8(14) . . ?
 C10D C11D H11D 120.6 . . ?
 C12D C11D H11D 120.6 . . ?
 F3A B1A F4A 109.5 . . ?
 F3A B1A F1A 109.4 . . ?
 F4A B1A F1A 109.5 . . ?
 F2A B1A F3A 109.5 . . ?
 F2A B1A F4A 109.5 . . ?
 F2A B1A F1A 109.5 . . ?
 F3B B1B F2B 109.4 . . ?
 F4B B1B F3B 109.5 . . ?
 F4B B1B F2B 109.5 . . ?
 F1B B1B F3B 109.5 . . ?
 F1B B1B F4B 109.5 . . ?
 F1B B1B F2B 109.5 . . ?
 F12B B3B F9B 108.5(12) . . ?
 F12B B3B F10B 116.1(13) . . ?
 F12B B3B F11B 112.6(13) . . ?
 F9B B3B F11B 101.2(11) . . ?
 F10B B3B F9B 113.2(11) . . ?
 F10B B3B F11B 104.2(11) . . ?
 F14A B4A F13A 109.5 . . ?
 F14A B4A F16A 109.4 . . ?
 F15A B4A F13A 109.5 . . ?
 F15A B4A F14A 109.5 . . ?
 F15A B4A F16A 109.5 . . ?
 F16A B4A F13A 109.4 . . ?
 F13B B4B F14B 109.4 . . ?
 F13B B4B F15B 109.5 . . ?
 F15B B4B F14B 109.5 . . ?
 F16B B4B F13B 109.5 . . ?
 F16B B4B F14B 109.5 . . ?
 F16B B4B F15B 109.5 . . ?
 C2F C3F N2C 115.0(11) . . ?
 C4F C3F N2C 128.0(12) . . ?
 C4F C3F C2F 115.6(13) . . ?
 C3F C2F H2F 120.3 . . ?
 C3F C2F C1F 119.5(14) . . ?
 C1F C2F H2F 120.3 . . ?
 C1F N1F C5F 115.8(18) . . ?
 C2F C1F H1F 117.8 . . ?
 N1F C1F C2F 124.4(17) . . ?
 N1F C1F H1F 117.8 . . ?
 C3F C4F H4F 119.8 . . ?
 C3F C4F C5F 120.4(16) . . ?
 C5F C4F H4F 119.8 . . ?
 N1F C5F C4F 124.1(19) . . ?
 N1F C5F H5F 117.9 . . ?
 C4F C5F H5F 117.9 . . ?
 O4 C11 C7 108.8 . . ?
 C12 O4 C11 113.5 . . ?
 O4 C12 C13 108.8 . . ?
 N1T2 C1T2 C2T2 165(4) . . ?
 C1T2 C2T2 H2TA 109.5 . . ?
 C1T2 C2T2 H2TB 109.5 . . ?
 C1T2 C2T2 H2TC 109.5 . . ?
 H2TA C2T2 H2TB 109.5 . . ?
 H2TA C2T2 H2TC 109.5 . . ?
 H2TB C2T2 H2TC 109.5 . . ?
 N1S3 C1S3 C2S3 180.0 . . ?
 C2EU O1EU C3EU 116.9(12) . . ?
 O1EU C2EU C1EU 105.6(13) . . ?
 O1EU C3EU C4EU 111.2(13) . . ?
 N1S4 C1S4 C2S4 180.0 . . ?
 C1S4 C2S4 H2SG 109.5 . . ?
 C1S4 C2S4 H2SH 109.5 . . ?
 C1S4 C2S4 H2SI 109.5 . . ?
 H2SG C2S4 H2SH 109.5 . . ?
 H2SG C2S4 H2SI 109.5 . . ?
 H2SH C2S4 H2SI 109.5 . . ?
 N1T4 C1T4 C2T4 179.96(5) . . ?
 C1T4 C2T4 H2TD 109.5 . . ?
 C1T4 C2T4 H2TE 109.5 . . ?
 C1T4 C2T4 H2TF 109.5 . . ?
 H2TD C2T4 H2TE 109.5 . . ?
 H2TD C2T4 H2TF 109.5 . . ?
 H2TE C2T4 H2TF 109.5 . . ?

loop_
  _geom_torsion_atom_site_label_1
  _geom_torsion_atom_site_label_2
  _geom_torsion_atom_site_label_3
  _geom_torsion_atom_site_label_4
  _geom_torsion
  _geom_torsion_site_symmetry_1
  _geom_torsion_site_symmetry_2
  _geom_torsion_site_symmetry_3
  _geom_torsion_site_symmetry_4
  _geom_torsion_publ_flag
 Co2 N6A C25A N7A 170.9(3) . . . . ?
 Co2 N6A C23A C24A -173.8(3) . . . . ?
 Co2 N6A C23A C22A 2.4(5) . . . . ?
 Co2 N6B C23B C22B -3.6(5) . . . . ?
 Co2 N6B C23B C24B 179.8(3) . . . . ?
 Co2 N6B C25B N7B -179.1(3) . . . . ?
 Co2 N5B C22B C23B 5.5(5) . . . . ?
 Co2 N5B C19B C18B -77.5(5) . . . . ?
 Co2 N5B C19B C20B 99.5(5) . . . . ?
 Co2 N5C C22C C23C -7.1(5) . . . . ?
 Co2 N5C C19C C18C -117.7(11) . . . . ?
 Co2 N5C C19C C20C 56.1(16) . . . . ?
 Co2 N5C C19F C18F -128.6(13) . . . . ?
 Co2 N5C C19F C20F 51.3(16) . . . . ?
 Co2 N5A C19A C20A 60(2) . . . . ?
 Co2 N5A C19A C18A -119.5(15) . . . . ?
 Co2 N5A C22A C23A 0.4(5) . . . . ?
 Co2 N5A C19D C20D 56.4(18) . . . . ?
 Co2 N5A C19D C18D -121.0(15) . . . . ?
 Co2 N6C C23C C22C 4.0(5) . . . . ?
 Co2 N6C C23C C24C -178.0(3) . . . . ?
 Co2 N6C C25C N7C 178.2(3) . . . . ?
 Co1 N3B C8B C9B 0.3(5) . . . . ?
 Co1 N3B C8B C7B -179.9(3) . . . . ?
 Co1 N3B C6B N2B 179.9(3) . . . . ?
 Co1 N3A C6A N2A -176.2(3) . . . . ?
 Co1 N3A C8A C7A 177.2(3) . . . . ?
 Co1 N3A C8A C9A -5.3(5) . . . . ?
 Co1 N4B C9B C8B -5.0(5) . . . . ?
 Co1 N4B C10B C11B -124.6(4) . . . . ?
 Co1 N4B C10B C15B 53.9(6) . . . . ?
 Co1 N4C C9C C8C -4.2(6) . . . . ?
 Co1 N4C C10C C15C 58(2) . . . . ?
 Co1 N4C C10C C11C -119.1(19) . . . . ?
 Co1 N4C C10F C15F 79.5(19) . . . . ?
 Co1 N4C C10F C11F -101(2) . . . . ?
 Co1 N3C C8C C7C -172.3(4) . . . . ?
 Co1 N3C C8C C9C 6.2(6) . . . . ?
 Co1 N3C C6C N2C 169.6(4) . . . . ?
 Co1 N4A C9A C8A 6.6(6) . . . . ?
 Co1 N4A C10A C15A 85(2) . . . . ?
 Co1 N4A C10A C11A -94.9(19) . . . . ?
 Co1 N4A C10D C15D 90.3(17) . . . . ?
 Co1 N4A C10D C11D -83.1(18) . . . . ?
 N7A C28A C29A C30A 179.5(4) . . . . ?
 N7A C28A C27A C26A 179.7(5) . . . . ?
 O1B C13B C12B C11B 179.5(4) . . . . ?
 O1B C13B C14B C15B -179.9(4) . . . . ?
 O1B C16B C17B C18B 178.1(5) . . . . ?
 O1B C16B C21B C20B -177.5(6) . . . . ?
 N6A C23A C24A N7A 0.4(5) . . . . ?
 N6A C23A C22A N5A -1.9(6) . . . . ?
 N6B C23B C22B N5B -1.4(6) . . . . ?
 N6B C23B C24B N7B -0.7(5) . . . . ?
 N2B C3B C2B C1B 178.3(4) . . . . ?
 N2B C3B C4B C5B -179.4(5) . . . . ?
 N7B C28B C27B C26B -179.1(4) . . . . ?
 N7B C28B C29B C30B 178.7(5) . . . . ?
 N7C C24C C23C N6C -1.2(5) . . . . ?
 N7C C24C C23C C22C 176.3(4) . . . . ?
 N7C C28C C27C C26C -179.1(5) . . . . ?
 N7C C28C C29C C30C 178.1(6) . . . . ?
 N3B C8B C9B N4B 3.4(7) . . . . ?
 N3B C8B C7B N2B -0.1(5) . . . . ?
 N5B C19B C18B C17B -178.7(4) . . . . ?
 N5B C19B C20B C21B 179.4(6) . . . . ?
 N5C C22C C23C N6C 2.2(6) . . . . ?
 N5C C22C C23C C24C -175.2(5) . . . . ?
 N5C C19C C18C C17C 173.7(11) . . . . ?
 N5C C19C C20C C21C -174.7(12) . . . . ?
 N5C C19F C18F C17F -179.2(14) . . . . ?
 N5C C19F C20F C21F 178.0(12) . . . . ?
 N2A C3A C2A C1A -179.2(4) . . . . ?
 N2A C3A C4A C5A 179.8(4) . . . . ?
 N5A C19A C20A C21A -175(2) . . . . ?
 N5A C19A C18A C17A 174.4(19) . . . . ?
 N5A C19D C20D C21D -177(2) . . . . ?
 N5A C19D C18D C17D 180(2) . . . . ?
 N3A C8A C7A N2A 0.5(5) . . . . ?
 N3A C8A C9A N4A -0.9(7) . . . . ?
 N4B C10B C11B C12B 177.1(4) . . . . ?
 N4B C10B C15B C14B -177.6(4) . . . . ?
 N4C C10C C15C C14C 180(2) . . . . ?
 N4C C10C C11C C12C -179.8(18) . . . . ?
 N4C C10F C15F C14F 178(3) . . . . ?
 N4C C10F C11F C12F -178(2) . . . . ?
 N3C C8C C7C N2C -1.5(6) . . . . ?
 N3C C8C C9C N4C -1.4(8) . . . . ?
 N8A C26A C27A C28A 1.1(9) . . . . ?
 N4A C10A C15A C14A 174.8(15) . . . . ?
 N4A C10A C11A C12A -175(2) . . . . ?
 N4A C10D C15D C14D -172.0(18) . . . . ?
 N4A C10D C11D C12D 174(2) . . . . ?
 N2C C3C C2C C1C -173.9(6) . . . . ?
 N2C C3C C4C C5C 174.1(7) . . . . ?
 N2C C3F C2F C1F 165.5(15) . . . . ?
 N2C C3F C4F C5F -162.0(14) . . . . ?
 C25A N7A C28A C29A -1.0(6) . . . . ?
 C25A N7A C28A C27A -178.7(4) . . . . ?
 C25A N7A C24A C23A 0.1(5) . . . . ?
 C25A N6A C23A C24A -0.7(5) . . . . ?
 C25A N6A C23A C22A 175.6(4) . . . . ?
 C3B N2B C6B N3B -178.4(4) . . . . ?
 C3B N2B C7B C8B 178.5(4) . . . . ?
 C3B C2B C1B N1B 0.8(9) . . . . ?
 C3B C4B C5B N1B 1.5(9) . . . . ?
 C28B N7B C25B N6B -176.0(4) . . . . ?
 C28B N7B C24B C23B 176.2(4) . . . . ?
 C28B C27B C26B N8B 0.9(8) . . . . ?
 C28B C29B C30B N8B 0.0(9) . . . . ?
 O1A C16A C17A C18A 179.8(14) . . . . ?
 O1A C16A C21A C20A 179.9(16) . . . . ?
 O1A C13A C14A C15A -176.1(12) . . . . ?
 O1A C13A C12A C11A 176.0(17) . . . . ?
 C23B N6B C25B N7B 0.0(5) . . . . ?
 C3A N2A C6A N3A -178.2(4) . . . . ?
 C3A N2A C7A C8A 177.9(4) . . . . ?
 C3A C2A C1A N1A -1.2(6) . . . . ?
 C3A C4A C5A N1A -0.1(7) . . . . ?
 C23A N6A C25A N7A 0.7(5) . . . . ?
 C22B N5B C19B C18B 106.7(5) . . . . ?
 C22B N5B C19B C20B -76.4(6) . . . . ?
 C22B C23B C24B N7B -176.6(4) . . . . ?
 C2A C3A C4A C5A -0.5(6) . . . . ?
 C25B N6B C23B C22B 177.0(4) . . . . ?
 C25B N6B C23B C24B 0.5(5) . . . . ?
 C25B N7B C28B C27B 164.9(4) . . . . ?
 C25B N7B C28B C29B -14.0(6) . . . . ?
 C25B N7B C24B C23B 0.7(5) . . . . ?
 C8B N3B C6B N2B -0.2(5) . . . . ?
 C6B N2B C3B C2B -11.0(7) . . . . ?
 C6B N2B C3B C4B 168.0(4) . . . . ?
 C6B N2B C7B C8B 0.0(5) . . . . ?
 C6B N3B C8B C9B -179.7(4) . . . . ?
 C6B N3B C8B C7B 0.2(5) . . . . ?
 C24B N7B C28B C27B -9.8(6) . . . . ?
 C24B N7B C28B C29B 171.2(4) . . . . ?
 C24B N7B C25B N6B -0.4(5) . . . . ?
 C24B C23B C22B N5B 174.2(5) . . . . ?
 C28A N7A C25A N6A -175.7(4) . . . . ?
 C28A N7A C24A C23A 175.3(4) . . . . ?
 C28A C29A C30A N8A 0.8(8) . . . . ?
 C9B N4B C10B C11B 46.0(6) . . . . ?
 C9B N4B C10B C15B -135.5(5) . . . . ?
 C9B C8B C7B N2B 179.7(5) . . . . ?
 C10B N4B C9B C8B -177.0(4) . . . . ?
 C10B C11B C12B C13B 0.3(6) . . . . ?
 C22C N5C C19C C18C 62.4(15) . . . . ?
 C22C N5C C19C C20C -123.9(13) . . . . ?
 C22C N5C C19F C18F 32(2) . . . . ?
 C22C N5C C19F C20F -148.1(10) . . . . ?
 C19B N5B C22B C23B -178.0(4) . . . . ?
 C19B C20B C21B C16B 1.0(11) . . . . ?
 C1A N1A C5A C4A 0.1(7) . . . . ?
 C24C N7C C28C C27C -16.3(7) . . . . ?
 C24C N7C C28C C29C 164.0(5) . . . . ?
 C24C N7C C25C N6C 0.0(5) . . . . ?
 C23C N6C C25C N7C -0.7(5) . . . . ?
 C13B O1B C16B C17B 12.4(7) . . . . ?
 C13B O1B C16B C21B -169.1(5) . . . . ?
 C13B C14B C15B C10B 0.4(8) . . . . ?
 C29A C28A C27A C26A 1.9(8) . . . . ?
 C27B C28B C29B C30B -0.2(8) . . . . ?
 C11B C10B C15B C14B 1.0(7) . . . . ?
 C7B N2B C3B C2B 170.8(5) . . . . ?
 C7B N2B C3B C4B -10.2(7) . . . . ?
 C7B N2B C6B N3B 0.1(5) . . . . ?
 C7B C8B C9B N4B -176.5(5) . . . . ?
 C24A N7A C25A N6A -0.5(5) . . . . ?
 C24A N7A C28A C29A -175.2(4) . . . . ?
 C24A N7A C28A C27A 7.1(7) . . . . ?
 C24A C23A C22A N5A 173.3(5) . . . . ?
 C6A N2A C3A C2A 0.6(6) . . . . ?
 C6A N2A C3A C4A -179.7(4) . . . . ?
 C6A N2A C7A C8A -0.4(5) . . . . ?
 C6A N3A C8A C7A -0.4(5) . . . . ?
 C6A N3A C8A C9A 177.1(4) . . . . ?
 C19A N5A C22A C23A -175.5(9) . . . . ?
 C19A C20A C21A C16A -1(3) . . . . ?
 C19A C18A C17A C16A 1(2) . . . . ?
 C8A N3A C6A N2A 0.2(5) . . . . ?
 C7A N2A C3A C2A -177.4(4) . . . . ?
 C7A N2A C3A C4A 2.2(6) . . . . ?
 C7A N2A C6A N3A 0.2(5) . . . . ?
 C7A C8A C9A N4A 175.9(5) . . . . ?
 C28C N7C C24C C23C -179.7(4) . . . . ?
 C28C N7C C25C N6C -179.5(4) . . . . ?
 C28C C27C C26C N8C -0.3(11) . . . . ?
 C28C C29C C30C N8C 2.4(11) . . . . ?
 C16B O1B C13B C12B 73.3(6) . . . . ?
 C16B O1B C13B C14B -108.2(5) . . . . ?
 C16B C17B C18B C19B -2.3(8) . . . . ?
 C30A N8A C26A C27A -3.0(9) . . . . ?
 C22A N5A C19A C20A -125.5(15) . . . . ?
 C22A N5A C19A C18A 55(2) . . . . ?
 C22A N5A C19D C20D -124.2(14) . . . . ?
 C22A N5A C19D C18D 58.4(19) . . . . ?
 C22A C23A C24A N7A -175.2(5) . . . . ?
 C25C N7C C24C C23C 0.8(5) . . . . ?
 C25C N7C C28C C27C 163.1(5) . . . . ?
 C25C N7C C28C C29C -16.6(7) . . . . ?
 C25C N6C C23C C22C -176.7(4) . . . . ?
 C25C N6C C23C C24C 1.2(5) . . . . ?
 C9A N4A C10A C15A -84.3(19) . . . . ?
 C9A N4A C10A C11A 95.9(19) . . . . ?
 C9A N4A C10D C15D -89.2(16) . . . . ?
 C9A N4A C10D C11D 97.4(16) . . . . ?
 C9A C8A C7A N2A -176.5(5) . . . . ?
 C17B C16B C21B C20B 1.1(10) . . . . ?
 C12B C13B C14B C15B -1.4(7) . . . . ?
 C2B C3B C4B C5B -0.3(8) . . . . ?
 C4A C3A C2A C1A 1.1(6) . . . . ?
 C14B C13B C12B C11B 1.0(7) . . . . ?
 C4B C3B C2B C1B -0.7(7) . . . . ?
 C29B C28B C27B C26B -0.1(7) . . . . ?
 C8C N3C C6C N2C -1.7(6) . . . . ?
 C15B C10B C11B C12B -1.3(6) . . . . ?
 C18B C19B C20B C21B -3.6(9) . . . . ?
 C20A C19A C18A C17A -5(2) . . . . ?
 C10A N4A C9A C8A 176.6(9) . . . . ?
 C10A C15A C14A C13A 0(2) . . . . ?
 C5A N1A C1A C2A 0.6(6) . . . . ?
 C1B N1B C5B C4B -1.5(9) . . . . ?
 C26B N8B C30B C29B 0.7(9) . . . . ?
 C6C N3C C8C C7C 2.0(6) . . . . ?
 C6C N3C C8C C9C -179.5(5) . . . . ?
 C6C N2C C7C C8C 0.5(7) . . . . ?
 C6C N2C C3C C2C -41.3(8) . . . . ?
 C6C N2C C3C C4C 146.0(6) . . . . ?
 C6C N2C C3F C2F -8(2) . . . . ?
 C6C N2C C3F C4F 157.5(14) . . . . ?
 C30B N8B C26B C27B -1.1(8) . . . . ?
 C27C C28C C29C C30C -1.6(9) . . . . ?
 C18A C19A C20A C21A 5(3) . . . . ?
 C20B C19B C18B C17B 4.3(8) . . . . ?
 C7C N2C C6C N3C 0.8(7) . . . . ?
 C7C N2C C3C C2C 143.4(6) . . . . ?
 C7C N2C C3C C4C -29.3(9) . . . . ?
 C7C N2C C3F C2F 155.2(13) . . . . ?
 C7C N2C C3F C4F -39.2(18) . . . . ?
 C7C C8C C9C N4C 176.7(6) . . . . ?
 C9C N4C C10C C15C -128.2(15) . . . . ?
 C9C N4C C10C C11C 54(3) . . . . ?
 C9C N4C C10F C15F -108.0(15) . . . . ?
 C9C N4C C10F C11F 72(3) . . . . ?
 C9C C8C C7C N2C -179.7(6) . . . . ?
 C16A O1A C13A C14A -144.0(13) . . . . ?
 C16A O1A C13A C12A 34.6(17) . . . . ?
 C5B N1B C1B C2B 0.3(9) . . . . ?
 C26A N8A C30A C29A 2.1(8) . . . . ?
 C27A C28A C29A C30A -2.8(7) . . . . ?
 C21B C16B C17B C18B -0.4(8) . . . . ?
 C17A C16A C21A C20A -3(2) . . . . ?
 C21A C16A C17A C18A 3(2) . . . . ?
 C26C N8C C30C C29C -2.0(11) . . . . ?
 C29C C28C C27C C26C 0.6(9) . . . . ?
 C15A C10A C11A C12A 5(3) . . . . ?
 C13A O1A C16A C17A 58.5(15) . . . . ?
 C13A O1A C16A C21A -124.5(11) . . . . ?
 C13A C12A C11A C10A 0(3) . . . . ?
 C14A C13A C12A C11A -5(2) . . . . ?
 C30C N8C C26C C27C 0.9(11) . . . . ?
 C3C N2C C6C N3C -175.3(5) . . . . ?
 C3C N2C C7C C8C 176.2(6) . . . . ?
 C3C C2C C1C N1C 0.9(11) . . . . ?
 C3C C4C C5C N1C -1.0(13) . . . . ?
 C2C C3C C4C C5C 1.5(11) . . . . ?
 C12A C13A C14A C15A 5(2) . . . . ?
 C1C N1C C5C C4C 0.5(14) . . . . ?
 C4C C3C C2C C1C -1.5(9) . . . . ?
 C11A C10A C15A C14A -5(3) . . . . ?
 C5C N1C C1C C2C -0.4(12) . . . . ?
 C19C N5C C22C C23C 172.9(7) . . . . ?
 C19C C20C C21C C16C 3.0(17) . . . . ?
 C10C N4C C9C C8C -179.2(9) . . . . ?
 C10C C15C C14C C13C 1.2(18) . . . . ?
 C10C C11C C12C C13C -2(2) . . . . ?
 C15C C10C C11C C12C 3(3) . . . . ?
 C15C C14C C13C C12C 0(3) . . . . ?
 C15C C14C C13C O1C -177.7(14) . . . . ?
 C14C C13C C12C C11C 1(2) . . . . ?
 C14C C13C O1C C16C -125.2(17) . . . . ?
 C13C O1C C16C C17C 53.7(13) . . . . ?
 C13C O1C C16C C21C -128.6(10) . . . . ?
 C11C C10C C15C C14C -2.4(17) . . . . ?
 C12C C13C O1C C16C 57.4(14) . . . . ?
 O1C C13C C12C C11C 178.0(11) . . . . ?
 O1C C16C C17C C18C -179.9(10) . . . . ?
 O1C C16C C21C C20C 178.5(9) . . . . ?
 C16C C17C C18C C19C -0.3(18) . . . . ?
 C17C C16C C21C C20C -3.8(14) . . . . ?
 C18C C19C C20C C21C -0.9(18) . . . . ?
 C20C C19C C18C C17C -0.4(19) . . . . ?
 C21C C16C C17C C18C 2.5(15) . . . . ?
 C2ET O1ET C3ET C4ET -68.6(13) . . . . ?
 C3ET O1ET C2ET C1ET 179.7(9) . . . . ?
 C10F N4C C9C C8C -177.4(11) . . . . ?
 C10F C15F C14F C13F 2.3(17) . . . . ?
 C10F C11F C12F C13F -2(3) . . . . ?
 C15F C10F C11F C12F 2(3) . . . . ?
 C15F C14F C13F C12F -3(3) . . . . ?
 C15F C14F C13F O1F -177.4(16) . . . . ?
 C14F C13F C12F C11F 2(3) . . . . ?
 C14F C13F O1F C16F -159.7(18) . . . . ?
 C13F O1F C16F C17F 86.6(14) . . . . ?
 C13F O1F C16F C21F -96.7(15) . . . . ?
 C11F C10F C15F C14F -1.9(19) . . . . ?
 C12F C13F O1F C16F 26(2) . . . . ?
 C19F N5C C22C C23C -171.0(9) . . . . ?
 C19F C20F C21F C16F 3.4(18) . . . . ?
 O1F C13F C12F C11F 176.6(16) . . . . ?
 O1F C16F C17F C18F 179.0(10) . . . . ?
 O1F C16F C21F C20F 179.8(10) . . . . ?
 C16F C17F C18F C19F -1.1(16) . . . . ?
 C17F C16F C21F C20F -3.6(15) . . . . ?
 C18F C19F C20F C21F -2(2) . . . . ?
 C20F C19F C18F C17F 1(2) . . . . ?
 C21F C16F C17F C18F 2.5(14) . . . . ?
 O1D C16D C17D C18D -178.7(18) . . . . ?
 O1D C16D C21D C20D -178.0(18) . . . . ?
 O1D C13D C14D C15D -175.0(15) . . . . ?
 O1D C13D C12D C11D 177(2) . . . . ?
 C19D N5A C22A C23A -179.0(10) . . . . ?
 C19D C20D C21D C16D -2(3) . . . . ?
 C19D C18D C17D C16D -5(3) . . . . ?
 C20D C19D C18D C17D 2.5(17) . . . . ?
 C18D C19D C20D C21D 0.9(18) . . . . ?
 C16D O1D C13D C14D -140.1(17) . . . . ?
 C16D O1D C13D C12D 45(3) . . . . ?
 C17D C16D C21D C20D 0(2) . . . . ?
 C21D C16D C17D C18D 4(3) . . . . ?
 C13D O1D C16D C17D 52(2) . . . . ?
 C13D O1D C16D C21D -130.9(17) . . . . ?
 C13D C12D C11D C10D -2(3) . . . . ?
 C10D N4A C9A C8A -173.8(8) . . . . ?
 C10D C15D C14D C13D -1.6(19) . . . . ?
 C15D C10D C11D C12D 1(3) . . . . ?
 C14D C13D C12D C11D 2(3) . . . . ?
 C12D C13D C14D C15D 0(2) . . . . ?
 C11D C10D C15D C14D 1.3(18) . . . . ?
 C3F N2C C6C N3C 163.3(14) . . . . ?
 C3F N2C C7C C8C -170.7(7) . . . . ?
 C3F C2F C1F N1F -2(3) . . . . ?
 C3F C4F C5F N1F -1.3(18) . . . . ?
 C2F C3F C4F C5F 4(2) . . . . ?
 C1F N1F C5F C4F -2.6(19) . . . . ?
 C4F C3F C2F C1F -2(3) . . . . ?
 C5F N1F C1F C2F 4(3) . . . . ?
 C7 C11 O4 C12 180.0 . . . . ?
 C11 O4 C12 C13 -180.0 . . . . ?
 C2EU O1EU C3EU C4EU -178.9(16) . . . . ?
 C3EU O1EU C2EU C1EU -176.7(17) . . . . ?

_smtbx_masks_special_details
;
A solvent mask was calculated and 85 electrons were 
found in a volume of 331 A^3 in 1 void per unit cell. 
This is attributed to the presence of an unknown
combination of solvent molecules per Asymmetric Unit 
which for which low residual electron density
prevented modelling.
;
loop_
  _smtbx_masks_void_nr
  _smtbx_masks_void_average_x
  _smtbx_masks_void_average_y
  _smtbx_masks_void_average_z
  _smtbx_masks_void_volume
  _smtbx_masks_void_count_electrons
  _smtbx_masks_void_content
 1 0.500 0.000 0.000 330.6 85.4 '2 Unknown'

_shelx_res_file
;
TITL cut83_a.res in P-1
    cut83_a.res
    created by SHELXL-2018/3 at 21:06:22 on 01-Dec-2022
REM Old TITL cut83 in P-1
REM SHELXT solution in P-1: R1 0.269, Rweak 0.019, Alpha 0.098
REM <I/s> 0.000 for 0 systematic absences, Orientation as input
REM Formula found by SHELXT: C237 B6 N46 O16 F4A Co4
CELL 0.71073 16.06 17.71 20.57 80.346 89.762 72.796
ZERR 2 0.0032 0.0035 0.0041 0.03 0.03 0.03
LATT 1
SFAC C H B Co F N O
UNIT 204.67 150 8 4 32 55 8.67
SADI C17C C16C C21C C16C C21C C20C C20C C19C C19C C18C C18C C17C
RIGU C19C C16C C17C C18C C20C C21C
FLAT C10C C15C C14C C13C C11C C12C
SADI C15C C10C C11C C10C C12C C11C C13C C12C C14C C13C C15C C14C
RIGU C10C C15C C14C C13C C11C C12C
FLAT C19C C16C C17C C18C C20C C21C
FLAT C10B C13B C11B C12B C14B C15B
RIGU C16B C17B C18B C20B C21B C19B
FLAT C19B C16B C17B C18B C20B C21B
SADI C18B C17B C17B C16B C21B C16B C21B C20B C20B C19B C19B C18B
RIGU C10B C13B C11B C12B C14B C15B
SADI C15B C10B C11B C10B C12B C11B C13B C12B C14B C13B C15B C14B
SADI C10C C15C C10F C15F
SADI C10C C11C C10F C11F
SADI C15C C14C C15F C14F
SADI 0.04 C14C C12C C14F C12F
SADI C14C C13C C14F C13F
SADI C13C C12C C13F C12F
SADI 0.04 O1C C21C O1F C21F
SADI C13C O1C C13F O1F
SADI 0.04 C16C C20C C16F C20F
SADI C19C C20C C19F C20F
SADI 0.04 C13C C11C C13F C11F
SADI O1C C16C O1F C16F
SADI C16C C17C C16F C17F
SADI C16C C21C C16F C21F
SADI C11C C12C C11F C12F
SADI C17C C18C C17F C18F
SADI 0.04 C14C O1C C14F O1F
SADI 0.04 C13C C16C C13F C16F
SADI C20C C21C C20F C21F
SADI 0.04 C12C O1C C12F O1F
SADI 0.04 O1C C17C O1F C17F
SADI 0.04 C16C C18C C16F C18F
SADI 0.04 N5C C18C N5C C18F
SADI 0.04 N5C C20C N5C C20F
SADI 0.04 N4C C15C N4C C15F
SADI 0.04 N4C C11C N4C C11F
SADI 0.04 C19C C17C C19F C17F
SADI 0.04 C17C C21C C17F C21F
SADI 0.04 C19C C21C C19F C21F
SADI 0.04 C18C C20C C18F C20F
SADI 0.04 C10C C14C C10F C14F
SADI 0.04 C10C C12C C10F C12F
SADI N5C C19C N5C C19F
SADI N4C C10C N4C C10F
SADI C19C C18C C19F C18F
SADI 0.04 C15C C13C C15F C13F
SADI 0.04 C15C C11C C15F C11F
FLAT C10F C15F C14F C13F C11F C12F
RIGU C19F C16F C17F C18F C20F C21F
FLAT C19F C16F C17F C18F C20F C21F
RIGU C10F C15F C14F C13F C11F C12F
SADI C15F C10F C11F C10F C12F C11F C13F C12F C14F C13F C15F C14F
SADI C18F C17F C17F C16F C21F C16F C21F C20F C20F C19F C19F C18F
SADI N1C C1C N1C C5C
FLAT C3C C2C N1C C1C C4C C5C
SADI C2C C1C C3C C2C C4C C3C C5C C4C
RIGU C3C C2C N1C C1C C4C C5C
SADI C19A C20A C19D C20D
SADI O1A C16A O1D C16D
SADI 0.04 C19A C21A C19D C21D
SADI O1A C13A O1D C13D
SADI C19A C18A C19D C18D
SADI C18A C17A C18D C17D
SADI 0.04 C20A C18A C20D C18D
SADI 0.04 C10A C14A C10D C14D
SADI C16A C17A C16D C17D
SADI 0.04 C18A C16A C18D C16D
SADI C16A C21A C16D C21D
SADI N4A C10A N4A C10D
SADI C10A C15A C10D C15D
SADI C10A C11A C10D C11D
SADI N5A C19A N5A C19D
SADI 0.04 O1A C14A O1D C14D
SADI 0.04 O1A C12A O1D C12D
SADI 0.04 C17A C21A C17D C21D
SADI 0.04 C19A C17A C19D C17D
SADI 0.04 C15A C13A C15D C13D
SADI 0.04 C20A C16A C20D C16D
SADI 0.04 C13A C11A C13D C11D
SADI 0.04 C10A C12A C10D C12D
SADI 0.04 C14A C12A C14D C12D
SADI 0.04 C16A C13A C16D C13D
SADI C15A C14A C15D C14D
SADI 0.04 C15A C11A C15D C11D
SADI C13A C14A C13D C14D
SADI C13A C12A C13D C12D
SADI C12A C11A C12D C11D
SADI 0.04 N5A C20A N5A C20D
SADI 0.04 N5A C18A N5A C18D
SADI 0.04 N4A C15A N4A C15D
SADI 0.04 N4A C11A N4A C11D
SADI C20A C21A C20D C21D
SADI 0.04 O1A C17A O1D C17D
SADI 0.04 O1A C21A O1D C21D
FLAT C19D C20D C18D C16D C17D C21D
FLAT C13D C10D C15D C14D C12D C11D
RIGU C19D C20D C18D C16D C17D C21D
SADI C11D C10D C15D C10D C15D C14D C14D C13D C13D C12D C12D C11D
RIGU C13D C10D C15D C14D C12D C11D
SADI C17D C16D C21D C16D C21D C20D C20D C19D C19D C18D C18D C17D
SADI 0.04 F3A F1A F3B F1B
SADI 0.04 F4A F1A F4B F1B
SADI B1A F1A B1B F1B
SADI 0.04 F4A F2A F4B F2B
SADI 0.04 F3A F2A F3B F2B
SADI 0.04 F3A F4A F3B F4B
SADI B1A F3A B1B F3B
SADI B1A F4A B1B F4B
SADI B1A F2A B1B F2B
SADI 0.04 F1A F2A F1B F2B
RIGU F1B B1B F3B F4B F2B
RIGU F1A B1A F3A F4A F2A
RIGU B3A F12A F9A F10A F11A
SADI B3A F12A B3A F9A B3A F10A B3A F11A
SADI 0.04 F12A F10A F12A F11A F9A F10A F9A F11A F10A F11A
SADI 0.04 F12A F11A F12B F11B
SADI 0.04 F12A F10A F12B F10B
RIGU B3B F12B F9B F10B F11B
SADI 0.04 F12B F10B F12B F11B F9B F10B F9B F11B F10B F11B
SADI 0.04 F9A F10A F9B F10B
SADI 0.04 F9A F11A F9B F11B
SADI 0.04 F12A F9A F12B F9B
SADI 0.04 F10A F11A F10B F11B
SADI B3B F12B B3B F9B B3B F10B B3B F11B
SADI F10A B3A F10B B3B
SADI F11A B3A F11B B3B
SADI F12A B3A F12B B3B
SADI F9A B3A F9B B3B
RIGU F13A B4A F14A F15A F16A
SADI 0.04 F13A F16A F13B F16B
RIGU B4B F13B F14B F15B F16B
SADI 0.04 F13A F14A F13B F14B
SADI B4A F16A B4B F16B
SADI 0.04 F14A F15A F14B F15B
SADI 0.04 F14A F16A F14B F16B
SADI B4A F13A B4B F13B
SADI B4A F15A B4B F15B
SADI B4A F14A B4B F14B
SADI 0.04 F15A F16A F15B F16B
SADI 0.04 F13A F15A F13B F15B
SADI N1C C1C N1F C1F
SADI 0.04 N2C C2C N2C C2F
SADI N1F C5F N1F C1F
SADI 0.04 C3C C1C C3F C1F
SADI C4C C5C C4F C5F
RIGU N1F C5F C4F C3F C2F C1F
SADI 0.04 C3C C5C C3F C5F
SADI C3C C2C C3F C2F
SADI 0.04 C2C N1C C2F N1F
SADI 0.04 C2C C4C C2F C4F
SADI 0.04 N2C C4C N2C C4F
SADI C2F C1F C5F C4F C4F C3F C3F C2F
SADI 0.04 N1C C4C N1F C4F
SADI N1C C5C N1F C5F
FLAT N1F C5F C4F C3F C2F C1F
SADI 0.04 C1C C5C C1F C5F
SADI N2C C3C N2C C3F
SADI C2C C1C C2F C1F
SADI C3C C4C C3F C4F
RIGU C2S2 N1S2 C1S2
DFIX 1.45 C1S2 C2S2
DANG 2.62 C2S2 N1S2
DFIX 1.16 N1S2 C1S2
DFIX 1.45 C1T2 C2T2
SADI 0.04 N1S2 C2S2 N1T2 C2T2
SADI N1S2 C1S2 N1T2 C1T2
SADI C1S2 C2S2 C1T2 C2T2
DFIX 1.16 N1T2 C1T2
DANG 2.62 N1T2 C2T2
DFIX 1.42 O1ET C2ET O1ET C3ET
DANG 2.39 O1ET C1ET
DFIX 1.52 C2ET C1ET C4ET C3ET
DANG 2.39 C4ET O1ET
DANG 2.38 C3ET C2ET
DFIX 1.42 O1EU C2EU O1EU C3EU
SADI C1ET C2ET C1EU C2EU
DFIX 1.52 C4EU C3EU C2EU C1EU
DANG 2.39 C4EU O1EU
SADI O1ET C2ET O1EU C2EU
SADI 0.04 O1ET C1ET O1EU C1EU
SADI O1ET C3ET O1EU C3EU
SADI 0.04 O1ET C4ET O1EU C4EU
SADI C3ET C4ET C3EU C4EU
SADI 0.04 C2ET C3ET C2EU C3EU
DANG 2.39 O1EU C1EU
DANG 2.38 C2EU C3EU
SADI C1S4 C2S4 C1T4 C2T4
SADI 0.04 N1S4 C2S4 N1T4 C2T4
SADI N1S4 C1S4 N1T4 C1T4
RIGU C2S4 N1S4 C1S4
RIGU C2T4 N1T4 C1T4

L.S. 100
PLAN  38
SIZE 0.3 0.2 0.02
TEMP -173.15
CONF
FREE C9A C10D
BOND
LIST 6
MORE -1
BOND $H
ABIN
fmap 2
acta
OMIT 3 4 3
REM <olex2.extras>
REM <HklSrc "%.\\cut83_a.hkl">
REM </olex2.extras>

WGHT    0.186000    4.497100
FVAR       0.26843   0.50818   0.53103   0.54540   0.50133   0.63643   0.68066
FVAR       0.65199   0.62571   0.56338
CO2   4    0.784969    0.281862    0.051242    11.00000    0.05517    0.07253 =
         0.05713   -0.00134    0.00539   -0.01491
CO1   4    0.243340    0.212027    0.407585    11.00000    0.05439    0.08837 =
         0.06480   -0.01156    0.00567   -0.01756
N7A   6    0.879444    0.486439    0.041960    11.00000    0.05166    0.08111 =
         0.05821   -0.01215    0.00047   -0.01927
O1B   7    0.380560    0.187098    0.081092    11.00000    0.05069    0.14931 =
         0.07438   -0.04576    0.00741   -0.02544
N6A   6    0.838069    0.377155    0.050301    11.00000    0.05907    0.07496 =
         0.05497   -0.00852    0.00223   -0.01512
N6B   6    0.897307    0.181669    0.057443    11.00000    0.05716    0.07078 =
         0.05808   -0.00345    0.00639   -0.01902
N2B   6    0.007570    0.391604    0.437292    11.00000    0.05649    0.07778 =
         0.06437   -0.01460    0.00492   -0.02264
N7B   6    1.018915    0.081394    0.062612    11.00000    0.05148    0.07546 =
         0.05504   -0.01337    0.00153   -0.01748
N7C   6    0.776924    0.302908   -0.161220    11.00000    0.07369    0.07181 =
         0.05774   -0.01021    0.00809   -0.03116
N3B   6    0.127869    0.300719    0.418637    11.00000    0.05893    0.07866 =
         0.06414   -0.01268    0.00192   -0.01982
N5B   6    0.730120    0.181900    0.064288    11.00000    0.05523    0.07401 =
         0.05997   -0.00070    0.00539   -0.01661
N5C   6    0.655000    0.366250    0.025129    11.00000    0.05914    0.07250 =
         0.05782    0.00635    0.00913   -0.01660
N2A   6    0.116186    0.026430    0.416593    11.00000    0.06724    0.07434 =
         0.05220   -0.00723    0.00597   -0.01828
N5A   6    0.801507    0.284758    0.156872    11.00000    0.05212    0.09983 =
         0.05421    0.00402    0.00603   -0.01502
N6C   6    0.778134    0.295016   -0.053323    11.00000    0.05651    0.07258 =
         0.06326   -0.00158    0.00490   -0.02564
N3A   6    0.183603    0.119383    0.409790    11.00000    0.05957    0.08155 =
         0.06341   -0.01215    0.00763   -0.01695
N4B   6    0.199700    0.264909    0.305015    11.00000    0.05887    0.08609 =
         0.06501   -0.01686    0.00220   -0.01664
N4C   6    0.330274    0.284679    0.411845    11.00000    0.05988    0.09433 =
         0.04962    0.00109   -0.00320   -0.02051
N3C   6    0.281353    0.184960    0.509950    11.00000    0.05759    0.08815 =
         0.06448    0.00398    0.00955   -0.01967
N1A   6   -0.089159   -0.077454    0.425224    11.00000    0.10784    0.09812 =
         0.05276   -0.00737    0.01430   -0.05352
N8A   6    0.930424    0.700602   -0.042907    11.00000    0.07389    0.07753 =
         0.08811   -0.00897   -0.01937   -0.02210
N4A   6    0.354030    0.108425    0.395830    11.00000    0.05767    0.09153 =
         0.08265   -0.00929    0.01313   -0.01189
N1B   6   -0.187626    0.532281    0.541781    11.00000    0.08612    0.08903 =
         0.09614   -0.02448    0.02509   -0.02034
N8B   6    1.287050   -0.043123    0.084005    11.00000    0.05897    0.11372 =
         0.11125   -0.04856   -0.00164   -0.01213
N2C   6    0.327050    0.143321    0.611409    11.00000    0.09242
C25A  1    0.854207    0.434755    0.009218    11.00000    0.05986    0.07537 =
         0.05552   -0.00777   -0.00267   -0.01403
AFIX  43
H25A  2    0.849189    0.440384   -0.037470    11.00000   -1.20000
AFIX   0
C3B   1   -0.059192    0.438338    0.472946    11.00000    0.06200    0.07326 =
         0.06937   -0.01436    0.00878   -0.02732
C28B  1    1.110605    0.039403    0.068861    11.00000    0.05194    0.08849 =
         0.05923   -0.02321    0.00068   -0.01867
PART 1
O1A   7    0.705586    0.101926    0.372245    31.00000    0.04707    0.08749 =
         0.06728    0.01909   -0.00484   -0.01697
PART 0
C23B  1    0.876847    0.110586    0.060868    11.00000    0.05496    0.07139 =
         0.05895   -0.00354    0.00714   -0.01752
C3A   1    0.046714   -0.008577    0.419341    11.00000    0.07608    0.07802 =
         0.04325   -0.00399    0.00863   -0.02460
C23A  1    0.852159    0.391706    0.113008    11.00000    0.04833    0.09804 =
         0.06154   -0.01092    0.00390   -0.01918
C22B  1    0.786304    0.114041    0.063738    11.00000    0.05973    0.07535 =
         0.06250   -0.00038    0.00667   -0.02186
AFIX  43
H22B  2    0.768906    0.066994    0.065185    11.00000   -1.20000
AFIX   0
C2A   1   -0.038972    0.039046    0.418615    11.00000    0.07832    0.07900 =
         0.04496   -0.00175    0.00281   -0.02916
AFIX  43
H2A   2   -0.052774    0.095533    0.415738    11.00000   -1.20000
AFIX   0
C25B  1    0.982860    0.162061    0.058591    11.00000    0.05358    0.07614 =
         0.05785   -0.00793    0.00287   -0.01964
AFIX  43
H25B  2    1.015335    0.199261    0.056845    11.00000   -1.20000
AFIX   0
N8C   6    0.863823    0.265916   -0.349934    11.00000    0.12091    0.12870 =
         0.07191   -0.02718    0.02151   -0.06216
C8B   1    0.088475    0.345400    0.359629    11.00000    0.05632    0.08117 =
         0.06626   -0.01239    0.00028   -0.01909
C6B   1    0.078333    0.329163    0.464751    11.00000    0.06067    0.07734 =
         0.06523   -0.00838    0.00701   -0.02517
AFIX  43
H6B   2    0.089615    0.309486    0.510735    11.00000   -1.20000
AFIX   0
C24B  1    0.952306    0.047800    0.064602    11.00000    0.05670    0.07026 =
         0.06101   -0.00958    0.00372   -0.01784
AFIX  43
H24B  2    0.957192   -0.007507    0.067887    11.00000   -1.20000
AFIX   0
C28A  1    0.896734    0.558783    0.012955    11.00000    0.05177    0.07752 =
         0.06790   -0.01412   -0.00219   -0.01182
C9B   1    0.129779    0.326219    0.299426    11.00000    0.06156    0.09455 =
         0.06310   -0.01565    0.00204   -0.02295
AFIX  43
H9B   2    0.106810    0.357099    0.257549    11.00000   -1.20000
AFIX   0
C10B  1    0.243570    0.247796    0.245913    11.00000    0.05178    0.09986 =
         0.06217   -0.01912   -0.00008   -0.01616
C22C  1    0.631970    0.377254   -0.035738    11.00000    0.06117    0.06969 =
         0.06549    0.00955   -0.00205   -0.01867
AFIX  43
H22C  2    0.574385    0.408010   -0.051515    11.00000   -1.20000
AFIX   0
C19B  1    0.640113    0.184450    0.069298    11.00000    0.05098    0.07668 =
         0.06770    0.00022    0.00297   -0.01701
C1A   1   -0.103993    0.001947    0.422204    11.00000    0.08179    0.09414 =
         0.04899   -0.00190    0.00846   -0.03596
AFIX  43
H1A   2   -0.162725    0.034568    0.422558    11.00000   -1.20000
AFIX   0
C24C  1    0.694525    0.345812   -0.146694    11.00000    0.07940    0.07469 =
         0.06090    0.00091   -0.00043   -0.02367
AFIX  43
H24C  2    0.646373    0.372900   -0.177065    11.00000   -1.20000
AFIX   0
C23C  1    0.696035    0.341563   -0.080225    11.00000    0.06466    0.07030 =
         0.05802    0.00072   -0.00049   -0.02449
C13B  1    0.334689    0.208964    0.136139    11.00000    0.05036    0.12267 =
         0.06147   -0.02575   -0.00401   -0.02318
C29A  1    0.890490    0.584018   -0.054168    11.00000    0.07008    0.09806 =
         0.06655   -0.01595    0.00005   -0.03866
AFIX  43
H29A  2    0.874769    0.553041   -0.082778    11.00000   -1.20000
AFIX   0
C27B  1    1.138413   -0.043243    0.087888    11.00000    0.06060    0.07815 =
         0.06929   -0.01858   -0.00108   -0.01187
AFIX  43
H27B  2    1.098260   -0.073373    0.096388    11.00000   -1.20000
AFIX   0
C11B  1    0.260297    0.307352    0.199678    11.00000    0.06518    0.10416 =
         0.06216   -0.02054   -0.00114   -0.02814
AFIX  43
H11B  2    0.240276    0.361754    0.205621    11.00000   -1.20000
AFIX   0
C7B   1    0.013658    0.402204    0.370488    11.00000    0.06551    0.07853 =
         0.06299   -0.01332    0.00461   -0.02433
AFIX  43
H7B   2   -0.025756    0.440875    0.338323    11.00000   -1.20000
AFIX   0
C24A  1    0.877979    0.458856    0.108007    11.00000    0.05585    0.11013 =
         0.05648   -0.01911    0.00570   -0.03123
AFIX  43
H24A  2    0.892154    0.481969    0.143297    11.00000   -1.20000
AFIX   0
C6A   1    0.107912    0.106693    0.413668    11.00000    0.06125    0.08221 =
         0.05274   -0.00824    0.00861   -0.01903
AFIX  43
H6A   2    0.054016    0.147338    0.414392    11.00000   -1.20000
AFIX   0
PART 1
C19A  1    0.778680    0.240923    0.215602    31.00000    0.04837    0.07754 =
         0.07600   -0.00789    0.00428   -0.01785
PART 0
C8A   1    0.244187    0.045215    0.409961    11.00000    0.06788    0.07701 =
         0.06072   -0.00959    0.00853   -0.01078
C7A   1    0.203947   -0.012109    0.414453    11.00000    0.07258    0.07789 =
         0.05629   -0.00996    0.00417   -0.00922
AFIX  43
H7A   2    0.230743   -0.067941    0.415863    11.00000   -1.20000
AFIX   0
C28C  1    0.806154    0.291076   -0.225554    11.00000    0.09104    0.08216 =
         0.06344   -0.01524    0.01326   -0.04306
C16B  1    0.466901    0.189147    0.079671    11.00000    0.05071    0.09854 =
         0.07268   -0.02001    0.00173   -0.01931
C30A  1    0.907187    0.654323   -0.079342    11.00000    0.06689    0.09668 =
         0.07076   -0.01030   -0.00602   -0.03438
AFIX  43
H30A  2    0.901811    0.671113   -0.125886    11.00000   -1.20000
AFIX   0
C22A  1    0.832977    0.340081    0.168627    11.00000    0.05410    0.11802 =
         0.05606   -0.01081    0.00325   -0.02838
AFIX  43
H22A  2    0.843163    0.346551    0.212531    11.00000   -1.20000
AFIX   0
C25C  1    0.824819    0.273491   -0.102941    11.00000    0.06569    0.07599 =
         0.06179   -0.00945    0.00933   -0.02912
AFIX  43
H25C  2    0.884230    0.241592   -0.098993    11.00000   -1.20000
AFIX   0
C9A   1    0.335121    0.042822    0.402759    11.00000    0.06329    0.09410 =
         0.06073   -0.00780    0.01031   -0.00316
AFIX  43
H9A   2    0.379351   -0.006698    0.403229    11.00000   -1.20000
AFIX   0
C17B  1    0.512681    0.196672    0.133230    11.00000    0.05959    0.10761 =
         0.05967   -0.00158    0.00576   -0.03156
AFIX  43
H17B  2    0.485441    0.202520    0.173937    11.00000   -1.20000
AFIX   0
C12B  1    0.306411    0.287379    0.144592    11.00000    0.06646    0.11735 =
         0.06126   -0.02365    0.00357   -0.03455
AFIX  43
H12B  2    0.318273    0.328033    0.112893    11.00000   -1.20000
AFIX   0
C2B   1   -0.065290    0.415153    0.539386    11.00000    0.07452    0.08400 =
         0.07450   -0.01465    0.00808   -0.01669
AFIX  43
H2B   2   -0.026248    0.366863    0.562717    11.00000   -1.20000
AFIX   0
C4A   1    0.064557   -0.090439    0.422401    11.00000    0.08884    0.08162 =
         0.05627   -0.00794    0.01469   -0.02811
AFIX  43
H4A   2    0.122897   -0.124135    0.422584    11.00000   -1.20000
AFIX   0
C14B  1    0.316834    0.149452    0.181086    11.00000    0.06665    0.10609 =
         0.08012   -0.02818    0.00044   -0.00557
AFIX  43
H14B  2    0.335590    0.095328    0.174319    11.00000   -1.20000
AFIX   0
C4B   1   -0.117499    0.507940    0.441280    11.00000    0.07313    0.08321 =
         0.08200   -0.00884    0.01874   -0.02117
AFIX  43
H4B   2   -0.114548    0.525539    0.395325    11.00000   -1.20000
AFIX   0
C29B  1    1.170312    0.080770    0.057177    11.00000    0.05812    0.09333 =
         0.09964   -0.03313    0.01100   -0.02002
AFIX  43
H29B  2    1.152383    0.137444    0.043940    11.00000   -1.20000
AFIX   0
C8C   1    0.345024    0.220262    0.521477    11.00000    0.08150
C15B  1    0.271370    0.169168    0.236149    11.00000    0.07107    0.09796 =
         0.07732   -0.01143    0.00791   -0.00878
AFIX  43
H15B  2    0.259203    0.128316    0.267448    11.00000   -1.20000
AFIX   0
C18B  1    0.599297    0.195650    0.127323    11.00000    0.06195    0.11028 =
         0.05981    0.00126   -0.00034   -0.03602
AFIX  43
H18B  2    0.630575    0.202767    0.163768    11.00000   -1.20000
AFIX   0
PART 1
C20A  1    0.814678    0.158403    0.226597    31.00000    0.07597    0.10067 =
         0.05373   -0.00980    0.00214   -0.03649
AFIX  43
H20A  2    0.856633    0.133388    0.198049    31.00000   -1.20000
AFIX   0
C10A  1    0.444029    0.112482    0.391782    31.00000    0.05450    0.06464 =
         0.07917   -0.02378    0.02210   -0.00847
PART 0
C5A   1   -0.004509   -0.121793    0.425175    11.00000    0.11103    0.08430 =
         0.06032   -0.01080    0.02441   -0.03589
AFIX  43
H5A   2    0.007999   -0.178048    0.427181    11.00000   -1.20000
AFIX   0
C1B   1   -0.130506    0.464479    0.571895    11.00000    0.09520    0.08961 =
         0.07775   -0.01737    0.01796   -0.02624
AFIX  43
H1B   2   -0.134230    0.448707    0.618025    11.00000   -1.20000
AFIX   0
C26B  1    1.228265   -0.079926    0.093924    11.00000    0.06335    0.09085 =
         0.08440   -0.02884   -0.00258   -0.01092
AFIX  43
H26B  2    1.248062   -0.136691    0.106356    11.00000   -1.20000
AFIX   0
C6C   1    0.271341    0.140685    0.564787    11.00000    0.08170
AFIX  43
H6C   2    0.230518    0.111010    0.570663    11.00000   -1.20000
AFIX   0
C30B  1    1.257513    0.037315    0.065287    11.00000    0.05811    0.12088 =
         0.12430   -0.05786    0.01236   -0.03162
AFIX  43
H30B  2    1.299304    0.065745    0.057204    11.00000   -1.20000
AFIX   0
C27C  1    0.747816    0.305487   -0.277402    11.00000    0.09743    0.11961 =
         0.06798   -0.01797    0.00155   -0.04207
AFIX  43
H27C  2    0.686759    0.324372   -0.272119    11.00000   -1.20000
AFIX   0
PART 1
C18A  1    0.721881    0.280863    0.258173    31.00000    0.05336    0.07670 =
         0.06395    0.00041    0.00179   -0.02852
AFIX  43
H18A  2    0.701244    0.337828    0.251401    31.00000   -1.20000
AFIX   0
PART 0
C20B  1    0.592557    0.179447    0.015084    11.00000    0.05326    0.16786 =
         0.07527   -0.04137    0.00799   -0.01559
AFIX  43
H20B  2    0.619153    0.174790   -0.025986    11.00000   -1.20000
AFIX   0
C7C   1    0.375340    0.192900    0.585807    11.00000    0.09734
AFIX  43
H7C   2    0.420017    0.205416    0.607971    11.00000   -1.20000
AFIX   0
C9C   1    0.368331    0.273364    0.468397    11.00000    0.08235
AFIX  43
H9C   2    0.410826    0.299164    0.475383    11.00000   -1.20000
AFIX   0
PART 1
C16A  1    0.728846    0.151659    0.319707    31.00000    0.05123    0.07191 =
         0.04850    0.00780   -0.00609   -0.02198
PART 0
C5B   1   -0.180129    0.551779    0.476890    11.00000    0.08520    0.08550 =
         0.09460   -0.00766    0.02060   -0.01313
AFIX  43
H5B   2   -0.220967    0.599214    0.453931    11.00000   -1.20000
AFIX   0
C26A  1    0.939910    0.674022    0.021361    11.00000    0.10949    0.08403 =
         0.09152   -0.01864   -0.02446   -0.02726
AFIX  43
H26A  2    0.959276    0.704691    0.048353    11.00000   -1.20000
AFIX   0
C27A  1    0.923386    0.603907    0.052253    11.00000    0.09907    0.08413 =
         0.07264   -0.01423   -0.01834   -0.02456
AFIX  43
H27A  2    0.930281    0.587807    0.098841    11.00000   -1.20000
AFIX   0
C21B  1    0.505965    0.181252    0.020893    11.00000    0.05354    0.18610 =
         0.08277   -0.06257    0.00432   -0.02006
AFIX  43
H21B  2    0.473566    0.176985   -0.016138    11.00000   -1.20000
AFIX   0
PART 1
C17A  1    0.696581    0.234982    0.310489    31.00000    0.05378    0.07555 =
         0.07504   -0.00464   -0.00220   -0.01581
AFIX  43
H17A  2    0.657020    0.260098    0.340438    31.00000   -1.20000
AFIX   0
C21A  1    0.789125    0.112912    0.279280    31.00000    0.06676    0.07446 =
         0.04843   -0.00125   -0.00595   -0.02100
AFIX  43
H21A  2    0.812548    0.056084    0.287552    31.00000   -1.20000
AFIX   0
PART 0
C26C  1    0.780824    0.291570   -0.338314    11.00000    0.12644    0.13414 =
         0.07422   -0.03034    0.00553   -0.04879
AFIX  43
H26C  2    0.739988    0.301437   -0.374336    11.00000   -1.20000
AFIX   0
C29C  1    0.893683    0.264585   -0.235812    11.00000    0.09965    0.14120 =
         0.07229   -0.03054    0.01680   -0.05843
AFIX  43
H29C  2    0.936076    0.255235   -0.200958    11.00000   -1.20000
AFIX   0
PART 1
C15A  1    0.498249    0.102689    0.445277    31.00000    0.06099    0.07592 =
         0.07710    0.02500    0.00759   -0.00706
AFIX  43
H15A  2    0.476389    0.097035    0.488231    31.00000   -1.20000
AFIX   0
C13A  1    0.617068    0.109077    0.377282    31.00000    0.04856    0.05844 =
         0.06861   -0.00232   -0.00197   -0.01306
C14A  1    0.584064    0.100813    0.438392    31.00000    0.06123    0.08534 =
         0.06621    0.02231   -0.00310   -0.01406
AFIX  43
H14A  2    0.620632    0.093705    0.476509    31.00000   -1.20000
AFIX   0
PART 0
C30C  1    0.918098    0.251976   -0.298399    11.00000    0.10306    0.17374 =
         0.08334   -0.04568    0.02927   -0.06681
AFIX  43
H30C  2    0.978711    0.231676   -0.304870    11.00000   -1.20000
AFIX   0
PART 1
C3C   1    0.335352    0.094765    0.676700    71.00000    0.06559
C2C   1    0.262201    0.085121    0.708662    71.00000    0.06819
AFIX  43
H2C   2    0.205666    0.105403    0.687390    71.00000   -1.20000
AFIX   0
N1C   6    0.354192    0.015890    0.805184    71.00000    0.10447
C12A  1    0.562695    0.125525    0.323762    31.00000    0.06129    0.14990 =
         0.06762   -0.04522    0.01709   -0.03302
AFIX  43
H12A  2    0.583402    0.135998    0.280873    31.00000   -1.20000
AFIX   0
C1C   1    0.275647    0.044164    0.773615    71.00000    0.08398
AFIX  43
H1C   2    0.226713    0.035951    0.796530    71.00000   -1.20000
AFIX   0
C4C   1    0.417430    0.066850    0.708143    71.00000    0.08174
AFIX  43
H4C   2    0.467485    0.074542    0.686613    71.00000   -1.20000
AFIX   0
C11A  1    0.477274    0.127152    0.331214    31.00000    0.08171    0.18192 =
         0.07536   -0.06173    0.01753   -0.05222
AFIX  43
H11A  2    0.439788    0.138908    0.292873    31.00000   -1.20000
AFIX   0
C5C   1    0.422721    0.026768    0.773219    71.00000    0.10498
AFIX  43
H5C   2    0.478415    0.006186    0.795802    71.00000   -1.20000
AFIX   0
C19C  1    0.598358    0.407201    0.072379    21.00000    0.04333    0.05696 =
         0.05247    0.00358    0.00537   -0.01178
C10C  1    0.361283    0.338881    0.362813    21.00000    0.06627    0.08898 =
         0.04483   -0.01047    0.00038   -0.01861
C15C  1    0.300786    0.405131    0.325050    21.00000    0.05677    0.07694 =
         0.05750   -0.02109   -0.00061   -0.01873
AFIX  43
H15C  2    0.240201    0.414467    0.331456    21.00000   -1.20000
AFIX   0
C14C  1    0.328580    0.457448    0.278208    21.00000    0.06214    0.08441 =
         0.06203   -0.00374   -0.00168   -0.01444
AFIX  43
H14C  2    0.286386    0.502729    0.253682    21.00000   -1.20000
AFIX   0
C13C  1    0.415247    0.445621    0.266327    21.00000    0.06774    0.06820 =
         0.05499   -0.00640    0.00935   -0.01812
C11C  1    0.448190    0.326884    0.349399    21.00000    0.07008    0.08658 =
         0.05812    0.00685    0.01444   -0.00795
AFIX  43
H11C  2    0.490608    0.280983    0.372939    21.00000   -1.20000
AFIX   0
C12C  1    0.475596    0.379544    0.302762    21.00000    0.06528    0.08860 =
         0.06716    0.00322    0.01728   -0.00854
AFIX  43
H12C  2    0.536065    0.370180    0.295822    21.00000   -1.20000
AFIX   0
O1C   7    0.440644    0.501128    0.220520    21.00000    0.06496    0.07699 =
         0.06967   -0.01282    0.01296   -0.01882
C16C  1    0.492235    0.468325    0.170035    21.00000    0.04657    0.06770 =
         0.05801   -0.00439    0.00211   -0.01562
C17C  1    0.465229    0.422506    0.131380    21.00000    0.06805    0.07764 =
         0.06523   -0.01247    0.01728   -0.03397
AFIX  43
H17C  2    0.410860    0.411946    0.137876    21.00000   -1.20000
AFIX   0
C18C  1    0.518042    0.392620    0.083634    21.00000    0.06133    0.07975 =
         0.06043   -0.01390    0.01087   -0.03426
AFIX  43
H18C  2    0.499626    0.360862    0.057173    21.00000   -1.20000
AFIX   0
C20C  1    0.623008    0.454303    0.111598    21.00000    0.04462    0.08145 =
         0.06345   -0.01502    0.00697   -0.01842
AFIX  43
H20C  2    0.677571    0.464592    0.105546    21.00000   -1.20000
AFIX   0
C21C  1    0.569349    0.486800    0.159660    21.00000    0.05269    0.07537 =
         0.06509   -0.01451    0.00305   -0.01896
AFIX  43
H21C  2    0.585593    0.521026    0.184793    21.00000   -1.20000
AFIX   0

PART 0
F5    5    0.044002    0.487817    0.186713    11.00000    0.07834    0.11070 =
         0.08237   -0.00822   -0.00508   -0.02501
F7    5    0.112814    0.537956    0.258073    11.00000    0.08874    0.12947 =
         0.06896   -0.02627   -0.01441   -0.00335
F6    5    0.167387    0.521910    0.156682    11.00000    0.13166    0.14203 =
         0.07545   -0.02446    0.00472   -0.06925
F8    5    0.045812    0.619220    0.162577    11.00000    0.17823    0.09733 =
         0.11943   -0.01204   -0.07563   -0.01855
B2    3    0.090609    0.542798    0.191413    11.00000    0.09905    0.08227 =
         0.08255   -0.02214   -0.03946   -0.00103

PART 1
F12A  5    0.746617    0.569543    0.307996    51.00000    0.11075    0.12836 =
         0.10479   -0.03481    0.00597   -0.06100
F9A   5    0.843189    0.463939    0.278454    51.00000    0.08289    0.42251 =
         0.19635   -0.21593   -0.04510    0.02578
F10A  5    0.711532    0.460960    0.292406    51.00000    0.18019    0.10704 =
         0.14975   -0.02740    0.01619   -0.06096
F11A  5    0.729502    0.543631    0.207778    51.00000    0.08891    0.22615 =
         0.10111   -0.04498    0.00920   -0.07331
B3A   3    0.759464    0.510258    0.271474    51.00000    0.07977    0.16070 =
         0.09749   -0.05270    0.00481   -0.04679

PART 0
N1S1  6    0.915361    0.245798    0.421038    11.00000    0.07664    0.09950 =
         0.13382   -0.01556    0.01101   -0.02500
C1S1  1    0.850558    0.285526    0.430664    11.00000    0.08497    0.09010 =
         0.09627   -0.01445    0.00760   -0.03179
C2S1  1    0.765289    0.337270    0.445121    11.00000    0.09426    0.11990 =
         0.19221   -0.05077    0.03582   -0.04337
AFIX 137
H2SA  2    0.748085    0.385984    0.411456    11.00000   -1.50000
H2SB  2    0.769019    0.351946    0.488646    11.00000   -1.50000
H2SC  2    0.721763    0.308471    0.444927    11.00000   -1.50000
AFIX   0

PART 1
O1ET  7    0.035752    0.067349    0.212537    91.00000    0.10100
C1ET  1    0.037649    0.199964    0.217000    91.00000    0.09426
C2ET  1    0.048891    0.115406    0.250207    91.00000    0.10570
C3ET  1    0.046360   -0.014160    0.242391    91.00000    0.10199
C4ET  1    0.138461   -0.058525    0.262299    91.00000    0.13390

N1S2  6    0.865720   -0.275384    0.370808    81.00000    0.08666    0.07333 =
         0.06638   -0.00310    0.00309   -0.00094
C1S2  1    0.881095   -0.304318    0.324057    81.00000    0.07795    0.07429 =
         0.06959   -0.00319    0.00581   -0.02223
C2S2  1    0.898101   -0.337382    0.263501    81.00000    0.12364    0.10883 =
         0.08557   -0.02316    0.02500   -0.04822
AFIX 137
H2SD  2    0.903266   -0.295469    0.227399    81.00000   -1.50000
H2SE  2    0.849886   -0.357201    0.252709    81.00000   -1.50000
H2SF  2    0.952607   -0.381752    0.269603    81.00000   -1.50000
AFIX   0

PART 2
C10F  1    0.350342    0.333011    0.355305   -21.00000    0.06292    0.10212 =
         0.05270    0.00897    0.00299   -0.03132
C15F  1    0.289960    0.406343    0.332221   -21.00000    0.07377    0.08054 =
         0.05238   -0.00870    0.01733   -0.02222
AFIX  43
H15F  2    0.235926    0.422893    0.352606   -21.00000   -1.20000
AFIX   0
C14F  1    0.310220    0.454910    0.278768   -21.00000    0.05813    0.06942 =
         0.05562   -0.01074    0.00783   -0.01307
AFIX  43
H14F  2    0.271229    0.506603    0.262447   -21.00000   -1.20000
AFIX   0
C13F  1    0.388133    0.427077    0.249417   -21.00000    0.06785    0.08244 =
         0.06206    0.00731    0.02082   -0.02183
C11F  1    0.428246    0.305078    0.326747   -21.00000    0.07078    0.11059 =
         0.08388    0.02739    0.01244   -0.00835
AFIX  43
H11F  2    0.467534    0.253629    0.343373   -21.00000   -1.20000
AFIX   0
C12F  1    0.447698    0.353698    0.273447   -21.00000    0.07336    0.11148 =
         0.08692    0.02655    0.03340    0.00041
AFIX  43
H12F  2    0.501824    0.336943    0.253225   -21.00000   -1.20000
AFIX   0
C19F  1    0.584121    0.393225    0.065528   -21.00000    0.06599    0.07000 =
         0.06165    0.01534    0.01112   -0.01994
O1F   7    0.403366    0.481844    0.198296   -21.00000    0.08420    0.07616 =
         0.07976    0.02133    0.04096    0.00745
C16F  1    0.465089    0.449908    0.152671   -21.00000    0.05845    0.06723 =
         0.06658    0.01232    0.02217   -0.00965
C17F  1    0.439422    0.423061    0.099801   -21.00000    0.06413    0.07094 =
         0.07772    0.00661    0.01792   -0.01822
AFIX  43
H17F  2    0.380257    0.424788    0.093615   -21.00000   -1.20000
AFIX   0
C18F  1    0.499509    0.393737    0.055946   -21.00000    0.06286    0.06757 =
         0.06793   -0.00088    0.01075   -0.01972
AFIX  43
H18F  2    0.482910    0.374026    0.019409   -21.00000   -1.20000
AFIX   0
C20F  1    0.609830    0.420678    0.119208   -21.00000    0.05424    0.09892 =
         0.06350    0.00838    0.00888   -0.02210
AFIX  43
H20F  2    0.669124    0.418207    0.125972   -21.00000   -1.20000
AFIX   0
C21F  1    0.548524    0.451588    0.162662   -21.00000    0.06846    0.08660 =
         0.06158    0.00285    0.00812   -0.01712
AFIX  43
H21F  2    0.563878    0.473350    0.198400   -21.00000   -1.20000
AFIX   0
O1D   7    0.702142    0.066728    0.354652   -31.00000    0.05808    0.15206 =
         0.09251    0.05391    0.02362   -0.00634
C19D  1    0.777446    0.228209    0.209105   -31.00000    0.04964    0.12563 =
         0.03122    0.02385   -0.00629   -0.01852
C20D  1    0.811647    0.145744    0.214263   -31.00000    0.04211    0.12563 =
         0.04584    0.02204   -0.00578   -0.01208
AFIX  43
H20D  2    0.854395    0.125054    0.184530   -31.00000   -1.20000
AFIX   0
C18D  1    0.715789    0.256500    0.254131   -31.00000    0.06451    0.10699 =
         0.06247    0.00771    0.01054   -0.02969
AFIX  43
H18D  2    0.689027    0.312580    0.251226   -31.00000   -1.20000
AFIX   0
C16D  1    0.725888    0.121358    0.305919   -31.00000    0.05428    0.11486 =
         0.06570    0.02610   -0.00241   -0.01381
C17D  1    0.693493    0.202988    0.303082   -31.00000    0.05700    0.12522 =
         0.05681    0.02386    0.01205   -0.01374
AFIX  43
H17D  2    0.654868    0.223169    0.335499   -31.00000   -1.20000
AFIX   0
C21D  1    0.785664    0.091953    0.261482   -31.00000    0.05617    0.12875 =
         0.05808    0.01653    0.00328   -0.01916
AFIX  43
H21D  2    0.809020    0.035732    0.262867   -31.00000   -1.20000
AFIX   0
C13D  1    0.613227    0.079667    0.362185   -31.00000    0.05972    0.10510 =
         0.06607    0.01914    0.02085   -0.00671
C10D  1    0.444713    0.092811    0.382534   -31.00000    0.05810    0.08428 =
         0.06895   -0.00952    0.01205   -0.00137
C15D  1    0.502125    0.073615    0.434673   -31.00000    0.06545    0.07191 =
         0.05998    0.01374    0.01307   -0.01251
AFIX  43
H15D  2    0.483180    0.064143    0.478272   -31.00000   -1.20000
AFIX   0
C14D  1    0.586947    0.067913    0.424550   -31.00000    0.06184    0.07435 =
         0.05951    0.00397    0.00937   -0.01059
AFIX  43
H14D  2    0.627654    0.055746    0.460998   -31.00000   -1.20000
AFIX   0
C12D  1    0.557194    0.096571    0.310539   -31.00000    0.06208    0.28351 =
         0.06288   -0.02634    0.02476   -0.02129
AFIX  43
H12D  2    0.577125    0.102869    0.266992   -31.00000   -1.20000
AFIX   0
C11D  1    0.470784    0.104880    0.320222   -31.00000    0.05729    0.27530 =
         0.05921   -0.04779    0.02097   -0.02022
AFIX  43
H11D  2    0.429883    0.118900    0.283703   -31.00000   -1.20000
AFIX   6

PART 1
B1A   3    0.606800    0.218042    0.569941    41.00000    0.09037    0.09722 =
         0.13699   -0.00334   -0.02844   -0.00684
F3A   5    0.592404    0.259453    0.623341    41.00000    0.11016    0.14319 =
         0.17573   -0.06324    0.02143   -0.00179
F4A   5    0.561208    0.268623    0.513251    41.00000    0.13983    0.11467 =
         0.19501    0.02204   -0.09317   -0.02882
F1A   5    0.696399    0.193851    0.558929    41.00000    0.09038    0.07488 =
         0.08979   -0.01057   -0.01808   -0.01557
F2A   5    0.577418    0.150274    0.584203    41.00000    0.09256    0.09266 =
         0.22313   -0.01581   -0.01852   -0.01229
AFIX   6

PART 2
B1B   3    0.610620    0.213182    0.544252   -41.00000    0.10887    0.08204 =
         0.16619   -0.00243   -0.03186   -0.02912
F3B   5    0.550603    0.270191    0.574525   -41.00000    0.13961    0.11274 =
         0.27186   -0.03961    0.02000   -0.00456
F4B   5    0.599783    0.236624    0.475492   -41.00000    0.14489    0.12148 =
         0.16835    0.03126   -0.05031   -0.06615
F1B   5    0.695691    0.207691    0.564638   -41.00000    0.10106    0.12240 =
         0.12249   -0.04723    0.00409   -0.03824
F2B   5    0.596350    0.138232    0.562392   -41.00000    0.08564    0.08606 =
         0.15306    0.00254   -0.00430   -0.02365
AFIX   0

F12B  5    0.776391    0.523818    0.322503   -51.00000    0.20436    0.25062 =
         0.08880   -0.06750    0.00270   -0.09479
B3B   3    0.782207    0.496000    0.265125   -51.00000    0.10079    0.14642 =
         0.07451   -0.02597   -0.02175   -0.04883
F9B   5    0.864640    0.448704    0.261416   -51.00000    0.07705    0.25749 =
         0.05767   -0.01493   -0.00115   -0.07385
F10B  5    0.721187    0.461559    0.252114   -51.00000    0.06949    0.18441 =
         0.17073   -0.07571    0.01436   -0.04691
F11B  5    0.775697    0.555118    0.211264   -51.00000    0.20269    0.13220 =
         0.09781   -0.02843    0.01729   -0.04373
PART 1
AFIX   6
B4A   3    0.902130   -0.144027    0.125821    61.00000    0.09471    0.07069 =
         0.05958    0.00329    0.01772   -0.02196
F13A  5    0.981849   -0.152586    0.095280    61.00000    0.07763    0.08640 =
         0.07309    0.00226    0.01992   -0.02180
F14A  5    0.845091   -0.067176    0.102733    61.00000    0.07931    0.06991 =
         0.07626    0.00532    0.01692   -0.02343
F15A  5    0.865309   -0.202036    0.110900    61.00000    0.10547    0.08083 =
         0.11685   -0.01489    0.01930   -0.03126
F16A  5    0.916383   -0.154279    0.194381    61.00000    0.09528    0.14085 =
         0.06033   -0.00354    0.01525   -0.02899
AFIX   6

PART 2
B4B   3    0.910622   -0.125363    0.129636   -61.00000    0.14346    0.14644 =
         0.12799    0.02692    0.03529   -0.06284
F13B  5    0.986573   -0.136213    0.093888   -61.00000    0.16269    0.07332 =
         0.17189    0.00682    0.08310   -0.01902
F14B  5    0.839153   -0.074712    0.088996   -61.00000    0.17750    0.09404 =
         0.09376   -0.01595    0.04348   -0.00552
F15B  5    0.896651   -0.199933    0.151004   -61.00000    0.09949    0.14775 =
         0.26337    0.11239    0.00304   -0.02905
F16B  5    0.920080   -0.090575    0.184458   -61.00000    0.18050    0.29652 =
         0.09250   -0.01765    0.04548   -0.04824
AFIX   0

C3F   1    0.356257    0.128795    0.686385   -71.00000    0.07959
C2F   1    0.296925    0.108656    0.730177   -71.00000    0.08554
AFIX  43
H2F   2    0.238566    0.116439    0.715334   -71.00000   -1.20000
AFIX   0
N1F   6    0.403882    0.061955    0.820506   -71.00000    0.13664
C1F   1    0.323774    0.076931    0.796089   -71.00000    0.11243
AFIX  43
H1F   2    0.281490    0.065348    0.825324   -71.00000   -1.20000
AFIX   0
C4F   1    0.438427    0.117531    0.713376   -71.00000    0.11058
AFIX  43
H4F   2    0.481005    0.132971    0.686609   -71.00000   -1.20000
AFIX   0
C5F   1    0.459229    0.083911    0.779145   -71.00000    0.13467
AFIX  43
H5F   2    0.516861    0.076079    0.795684   -71.00000   -1.20000
AFIX   6

PART -1
C7    1    0.611025    0.474988    0.588436    10.33333    0.12941
C11   1    0.588503    0.466096    0.519006    10.33333    0.20624
O4    7    0.496443    0.495818    0.507347    10.33333    0.11622
C12   1    0.468171    0.490327    0.443468    10.33333    0.22469
C13   1    0.369240    0.523708    0.436679    10.33333    0.13307
AFIX   0

PART 2
N1T2  6    0.880504   -0.293595    0.373242   -81.00000    0.10052    0.07882 =
         0.09186    0.00742   -0.00744    0.01003
C1T2  1    0.848265   -0.289897    0.322005   -81.00000    0.08797    0.07593 =
         0.06800    0.01066   -0.00617   -0.01754
C2T2  1    0.829959   -0.300406    0.255290   -81.00000    0.18332    0.10378 =
         0.07222   -0.01112   -0.02797   -0.06005
AFIX 137
H2TA  2    0.819812   -0.249211    0.225019   -81.00000   -1.50000
H2TB  2    0.777906   -0.318434    0.254630   -81.00000   -1.50000
H2TC  2    0.879855   -0.340636    0.241377   -81.00000   -1.50000
AFIX   6

PART 1
N1S3  6    0.351842   -0.023368    0.271873    10.50000    0.09093
C1S3  1    0.366340   -0.091055    0.269233    10.50000    0.10877
C2S3  1    0.384485   -0.175707    0.265940    10.50000    0.19179
AFIX   0
PART 2
O1EU  7    0.153597    0.024563    0.247670   -91.00000    0.09975
C2EU  1    0.063795    0.057230    0.245425   -91.00000    0.10442
C3EU  1    0.187115   -0.060549    0.259513   -91.00000    0.11530
C1EU  1    0.046762    0.146978    0.228272   -91.00000    0.11293
C4EU  1    0.284965   -0.087492    0.261958   -91.00000    0.10394

PART 1
AFIX   6
N1S4  6    0.316313    0.384348   -0.018182   101.00000    0.09000
C1S4  1    0.309951    0.338547   -0.050840   101.00000    0.10328
C2S4  1    0.302038    0.281305   -0.091658   101.00000    0.15975
AFIX 137
H2SG  2    0.272649    0.310283   -0.134168   101.00000   -1.50000
H2SH  2    0.267848    0.247980   -0.069267   101.00000   -1.50000
H2SI  2    0.360281    0.247048   -0.099069   101.00000   -1.50000
AFIX   6

PART 2
N1T4  6    0.324141    0.428137   -0.004739  -101.00000    0.07955
C1T4  1    0.348470    0.402698   -0.052239  -101.00000    0.08672
C2T4  1    0.378849    0.370879   -0.111680  -101.00000    0.13159
AFIX 137
H2TD  2    0.338736    0.401310   -0.149201  -101.00000   -1.50000
H2TE  2    0.380951    0.314259   -0.105704  -101.00000   -1.50000
H2TF  2    0.437336    0.375621   -0.120198  -101.00000   -1.50000
AFIX   0
HKLF 4


REM  cut83_a.res in P-1
REM wR2 = 0.2925, GooF = S = 1.044, Restrained GooF = 1.038 for all data
REM R1 = 0.0914 for 15394 Fo > 4sig(Fo) and 0.1052 for all 19708 data
REM 1727 parameters refined using 1021 restraints

END

WGHT      0.1860      4.4970

REM Highest difference peak  1.174,  deepest hole -0.803,  1-sigma level  0.081
Q1    1   0.3849  0.1547 -0.1310  11.00000  0.05    1.17
Q2    1   0.3368  0.1730  0.6279  11.00000  0.05    1.02
Q3    1   0.3192  0.2082 -0.1695  11.00000  0.05    0.94
Q4    1  -0.0059  0.5991  0.2006  11.00000  0.05    0.88
Q5    1   0.3652  0.2386  0.5913  11.00000  0.05    0.79
Q6    1   0.6015  0.5203  0.5094  11.00000  0.05    0.72
Q7    1   0.4562  0.4618  0.4623  11.00000  0.05    0.71
Q8    1   0.7659  0.3386  0.0224  11.00000  0.05    0.67
Q9    1   0.4186 -0.1547  0.2202  11.00000  0.05    0.62
Q10   1   0.0193  0.2158  0.2469  11.00000  0.05    0.61
Q11   1   0.0138 -0.0546  0.2464  11.00000  0.05    0.61
Q12   1   0.0873  0.0052  0.2499  11.00000  0.05    0.60
Q13   1   0.3711 -0.0738  0.2489  11.00000  0.05    0.58
Q14   1   0.0364  0.0863  0.2442  11.00000  0.05    0.57
Q15   1   0.2577  0.1533  0.4397  11.00000  0.05    0.57
Q16   1   0.3351  0.2535  0.5315  11.00000  0.05    0.56
Q17   1   0.3769 -0.0366  0.2835  11.00000  0.05    0.54
Q18   1   0.7651  0.4501  0.3385  11.00000  0.05    0.53
Q19   1   0.0587  0.1832  0.1963  11.00000  0.05    0.52
Q20   1   0.5061  0.4490  0.4078  11.00000  0.05    0.52
Q21   1   0.0966  0.1204  0.2355  11.00000  0.05    0.52
Q22   1   0.2353  0.2921  0.3700  11.00000  0.05    0.51
Q23   1   0.3564  0.1868  0.5132  11.00000  0.05    0.50
Q24   1   0.3840  0.1636  0.5780  11.00000  0.05    0.49
Q25   1   0.3220  0.1237  0.6003  11.00000  0.05    0.48
Q26   1   0.3563  0.3097  0.4733  11.00000  0.05    0.47
Q27   1   0.7911  0.2229  0.0815  11.00000  0.05    0.45
Q28   1   0.3142 -0.1532  0.2822  11.00000  0.05    0.45
Q29   1   0.3205  0.0149  0.8025  11.00000  0.05    0.44
Q30   1   0.3879  0.5528  0.4299  11.00000  0.05    0.44
Q31   1   0.2613  0.1055  0.4571  11.00000  0.05    0.44
Q32   1   0.3823  0.2396  0.4631  11.00000  0.05    0.44
Q33   1   0.5674  0.4736  0.4576  11.00000  0.05    0.44
Q34   1   0.3183 -0.0265  0.2530  11.00000  0.05    0.42
Q35   1   0.7607  0.3912  0.0029  11.00000  0.05    0.42
Q36   1   0.2811  0.1618  0.5823  11.00000  0.05    0.39
Q37   1   0.7860  0.1777  0.1005  11.00000  0.05    0.39
Q38   1   0.7966  0.2428  0.0303  11.00000  0.05    0.37
;
_shelx_res_checksum                81248
_shelx_hkl_file
;
   0   0  -1  120.27    3.04
   0   0  -1  121.06    3.04
   0   0   1  119.01    2.97
   0   0   1  115.31    2.91
   0   0  -2 1172.27   44.12
   0   0  -2 1015.75   25.10
   0   0  -2 1052.07   25.96
   0   0   2 1026.98   25.36
   0   0   2 1036.22   25.62
   0   0  -3   77.54    2.97
   0   0  -3   78.00    2.11
   0   0  -3   73.77    2.05
   0   0   3   76.54    2.11
   0   0   3   77.60    2.11
   0   0  -4   88.30    3.37
   0   0  -4   88.89    2.44
   0   0  -4   94.51    2.58
   0   0   4   92.00    2.51
   0   0   4   92.06    2.58
   0   0  -5  240.27    9.11
   0   0  -5  246.74    9.31
   0   0  -5  234.12    6.08
   0   0  -5  245.81    6.34
   0   0   5  241.65    6.27
   0   0   5  249.18    6.41
   0   0   6 7535.57  185.71
   0   0   6 7898.81  194.63
   0   0  -7  161.41    6.14
   0   0  -7  168.68    4.62
   0   0  -7  162.27    4.42
   0   0   7  166.17    4.49
   0   0   7  165.44    4.49
   0   0  -8 2705.15   66.97
   0   0  -8 2584.29   64.00
   0   0   8 2646.37   65.58
   0   0   8 2682.69   66.37
   0   0  -9  636.59   16.11
   0   0  -9  658.45   16.71
   0   0   9  654.69   16.58
   0   0   9  627.08   15.92
   0   0 -10   94.24    2.91
   0   0 -10   90.88    2.91
   0   0  10   93.65    2.97
   0   0  10   93.25    2.91
   0   0 -11  531.72   13.74
   0   0 -11  517.65   13.34
   0   0  11  533.83   13.74
   0   0  11  504.31   13.01
   0   0 -12  177.39    5.09
   0   0 -12  177.26    5.02
   0   0  12  182.81    5.22
   0   0  12  179.04    5.09
   0   0 -14   34.61    1.72
   0   0 -14   34.01    1.78
   0   0  14   35.00    1.72
   0   0  14   34.61    1.72
   0   0 -15   26.68    1.59
   0   0 -15   26.88    1.59
   0   0 -16    1.52    0.86
   0   0 -16    1.45    0.92
   0   0  16    1.52    0.79
   0   0  16    0.59    0.86
   0   0 -17   84.73    3.24
   0   0 -17   88.23    3.17
   0   0  17   89.49    3.17
   0   0  17   85.59    3.04
   0   0 -18    7.46    1.12
   0   0 -18   10.50    1.25
   0   0  18    7.20    0.99
   0   0  18    6.87    1.06
   0   0 -19   99.20    3.76
   0   0 -19  109.57    3.90
   0   0  19  108.18    3.70
   0   0  19  108.38    3.76
   0   0 -20    3.10    1.19
   0   0 -20    3.43    0.99
   0   0  20    2.58    0.99
   0   0  20    2.44    0.92
   0   0 -21    0.33    0.99
   0   0 -21    0.13    1.06
   0   0  21   -1.12    0.86
   0   0  21    0.40    0.86
   0   0 -22    2.44    1.12
   0   0  22    0.33    0.99
   0   0  22    3.17    0.92
   0   0 -23    2.97    1.12
   0   0 -23    5.22    1.19
   0   0  23    4.69    1.06
   0   0  23    5.55    1.19
   0   0 -24    1.06    1.06
   0   0 -24    0.07    1.12
   0   0  24    2.31    1.06
   0   0  24    0.07    0.92
   0  -1  24    1.52    0.92
   0  -1  24    0.53    0.92
   0   1 -24    0.46    1.06
   0   1 -24    1.85    1.12
   0  -1  23   -0.13    0.86
   0  -1  23    0.13    1.06
   0   1 -23    0.07    1.12
   0  -1  22    0.53    0.99
   0  -1  22    0.40    0.79
   0   1 -22    0.73    1.12
   0   1 -22   -0.40    1.12
   0  -1  21    0.53    0.86
   0  -1  21    1.78    0.92
   0   1 -21    0.07    0.99
   0   1 -21    0.26    0.92
   0  -1  20    9.71    1.19
   0  -1  20    9.84    1.25
   0   1 -20   10.57    1.32
   0   1 -20    8.32    1.32
   0  -1  19   25.03    1.65
   0  -1  19   23.58    1.52
   0   1 -19   25.16    1.78
   0   1 -19   26.48    1.78
   0  -1  18    3.17    0.86
   0  -1  18    1.72    0.86
   0   1 -18    2.84    0.99
   0   1 -18    2.38    0.92
   0  -1  17   22.39    1.45
   0  -1  17   24.30    1.59
   0   1 -17   23.78    1.59
   0   1 -17   22.98    1.65
   0  -1  16   -0.86    0.79
   0  -1  16    0.73    0.73
   0   1 -16    2.58    0.92
   0   1 -16    0.13    0.86
   0  -1  15    0.79    0.66
   0  -1  15    0.59    0.86
   0   1 -15   -0.53    0.86
   0   1 -15    2.18    0.86
   0  -1  14   16.51    1.12
   0  -1  14   15.39    1.19
   0   1 -14   14.53    1.19
   0   1 -14   13.74    1.19
   0  -1  12   26.48    1.39
   0  -1  12   24.96    1.25
   0  -1  11  512.23   13.21
   0  -1  11  540.96   13.87
   0   1 -11  545.26   14.00
   0   1 -11  551.86   14.20
   0  -1  10  584.62   14.86
   0  -1  10  575.57   14.73
   0   1 -10  571.67   14.60
   0   1 -10  581.58   14.86
   0  -1   9   42.80    1.59
   0  -1   9   46.89    1.78
   0   1  -9   44.71    1.65
   0   1  -9   46.36    1.78
   0  -1   8   16.11    0.92
   0  -1   8   18.23    1.06
   0   1  -8   16.38    0.99
   0   1  -8   16.38    1.06
   0  -1   7    3.83    0.66
   0  -1   7    3.70    0.66
   0   1  -7    3.70    0.66
   0   1  -7    5.42    0.73
   0  -1   6 1043.49   25.96
   0  -1   6 1025.00   25.56
   0   1  -6 1044.81   26.02
   0   1  -6 1045.47   26.09
   0  -1   5 2094.90   51.78
   0  -1   5 2027.54   50.13
   0   1  -5 2098.21   51.91
   0   1  -5 2065.84   51.05
   0   1  -4  262.85    9.97
   0  -1   4  260.87    6.60
   0  -1   4  257.44    6.60
   0   1  -4  266.95    6.80
   0   1  -4  256.18    6.54
   0  -1   3 2964.70  111.48
   0  -1   3 2666.18  100.25
   0   1  -3 2904.60  109.24
   0   1  -3 2835.25  106.59
   0  -1   3 2861.67   70.53
   0  -1   3 2872.90   70.86
   0   1  -3 2782.42   68.62
   0   1  -3 2814.78   69.41
   0  -1   2   83.61    3.17
   0   1  -2   76.35    2.91
   0   1  -2   76.41    2.91
   0  -1   2   68.62    1.85
   0  -1   2   68.95    1.85
   0   1  -2   68.02    1.85
   0   1  -2   68.62    1.85
   0  -1   1   42.99    1.65
   0  -1   1   43.13    1.65
   0   1  -1   43.72    1.72
   0   1  -1   42.86    1.65
   0  -1   1   40.35    1.12
   0  -1   1   37.12    1.06
   0   1  -1   40.68    1.12
   0   1  -1   38.31    1.06
   0   1   0    6.47    0.33
   0  -1   0    4.82    0.26
   0  -1   0    4.89    0.26
   0   1   0    5.15    0.26
   0   1   0    4.82    0.26
   0  -1  -1 1960.83   73.64
   0  -1  -1 2055.28   77.20
   0   1   1 2027.54   76.21
   0   1   1 2009.71   75.49
   0  -1  -1 2153.68   53.10
   0  -1  -1 2178.12   53.69
   0   1   1 2181.42   53.76
   0   1   1 2197.27   54.16
   0  -1  -2  149.19    5.68
   0  -1  -2  142.06    5.42
   0   1   2  142.32    5.42
   0   1   2  146.22    5.55
   0  -1  -2  148.33    3.83
   0  -1  -2  147.87    3.83
   0   1   2  147.48    3.76
   0   1   2  145.96    3.76
   0  -1  -3  918.67   34.54
   0  -1  -3  927.91   34.94
   0   1   3  895.55   33.68
   0   1   3  951.69   35.80
   0  -1  -3  929.23   23.05
   0  -1  -3  928.57   23.05
   0   1   3  939.80   23.31
   0   1   3  923.95   22.92
   0  -1  -4 3040.65  114.26
   0  -1  -4 2788.36  104.81
   0  -1  -4 2894.69   71.46
   0  -1  -4 2870.25   70.80
   0   1   4 2892.71   71.33
   0   1   4 2937.62   72.52
   0  -1  -5  277.05   10.50
   0  -1  -5  286.70   10.83
   0   1   5  288.81   10.96
   0   1   5  296.07   11.23
   0  -1  -5  267.08    6.87
   0  -1  -5  262.79    6.80
   0   1   5  268.07    6.93
   0   1   5  264.70    6.87
   0  -1  -6 9827.29  369.25
   0  -1  -6 9398.00  353.14
   0   1   6 9417.82  353.80
   0   1   6 9999.00  375.72
   0  -1  -6 9549.90  235.18
   0  -1  -6 8968.72  220.85
   0   1   6 9602.74  236.37
   0   1   6 9252.71  227.92
   0   1   7  296.47   11.23
   0   1   7  301.89   11.43
   0  -1  -7  312.72    8.12
   0  -1  -7  297.46    7.73
   0   1   7  302.15    7.86
   0   1   7  310.74    8.06
   0   1   8 1331.44   50.13
   0   1   8 1271.34   47.88
   0  -1  -8 1302.38   32.49
   0  -1  -8 1231.71   30.78
   0   1   8 1273.98   31.77
   0   1   8 1255.49   31.37
   0  -1  -9   42.27    1.72
   0  -1  -9   40.88    1.65
   0   1   9   45.04    1.72
   0   1   9   43.72    1.72
   0   1  10  375.46   14.27
   0   1  10  376.84   14.27
   0  -1 -10  379.95    9.97
   0  -1 -10  366.81    9.58
   0   1  10  384.18    9.97
   0   1  10  367.99    9.64
   0  -1 -11   56.27    2.25
   0  -1 -11   55.34    2.25
   0  -1 -11   58.05    2.18
   0  -1 -11   57.72    2.11
   0  -1 -12 1296.44   48.94
   0  -1 -12 1401.44   52.90
   0   1  12 1491.92   56.27
   0   1  12 1402.11   52.90
   0  -1 -12 1439.09   36.06
   0  -1 -12 1355.88   34.01
   0   1  12 1426.54   35.80
   0   1  12 1408.71   35.33
   0   1  13   28.99    1.19
   0  -1 -14  560.97   14.66
   0  -1 -14  561.83   14.60
   0   1  14  563.95   14.66
   0   1  14  549.55   14.27
   0  -1 -15   22.06    1.52
   0  -1 -15   25.56    1.52
   0   1  15   26.95    1.59
   0   1  15   24.96    1.52
   0  -1 -16    7.99    1.12
   0  -1 -16    9.84    1.12
   0   1  16   10.17    1.12
   0   1  16    8.65    1.06
   0  -1 -17   16.58    1.45
   0  -1 -17   15.65    1.39
   0   1  17   17.11    1.39
   0   1  17   15.59    1.32
   0  -1 -18  102.43    3.70
   0  -1 -18  102.63    3.57
   0   1  18  100.78    3.43
   0   1  18  110.69    3.70
   0  -1 -19   -0.53    1.06
   0  -1 -19    1.45    0.99
   0   1  19    0.66    0.92
   0   1  19    0.99    0.92
   0  -1 -20   74.23    3.24
   0  -1 -20   80.64    3.17
   0   1  20   81.56    3.17
   0   1  20   84.73    3.24
   0  -1 -21    1.98    1.06
   0  -1 -21    1.32    0.99
   0   1  21    0.20    0.86
   0   1  21   -0.46    0.86
   0  -1 -22   -1.45    0.99
   0   1  22   -0.07    0.86
   0   1  22   -1.59    0.99
   0  -1 -23   13.21    1.52
   0  -1 -23    8.98    1.32
   0   1  23   12.22    1.32
   0   1  23    8.85    1.32
   0  -1 -24    0.86    1.06
   0  -1 -24    0.59    1.12
   0   1  24    0.46    0.99
   0   1  24    1.06    0.92
   0  -2  23   -0.46    0.99
   0  -2  23    0.07    0.86
   0   2 -23   -0.20    1.12
   0  -2  22    3.96    0.99
   0  -2  22    5.22    1.19
   0   2 -22    3.24    1.19
   0   2 -22    4.16    1.25
   0  -2  21    1.59    0.86
   0  -2  21   -0.40    0.92
   0   2 -21   -0.59    1.06
   0   2 -21    0.73    0.99
   0  -2  20   -0.59    0.86
   0  -2  20   -0.07    0.79
   0   2 -20   -0.13    0.99
   0   2 -20    0.00    1.06
   0  -2  19    1.06    0.92
   0  -2  19    1.65    0.86
   0   2 -19    1.65    1.06
   0   2 -19    2.18    0.99
   0  -2  18   14.20    1.19
   0  -2  18   13.01    1.32
   0   2 -18   15.52    1.39
   0   2 -18   14.79    1.45
   0  -2  17   13.41    1.25
   0  -2  17   12.88    1.12
   0   2 -17   12.09    1.19
   0   2 -17   12.88    1.25
   0  -2  16   57.52    2.25
   0  -2  16   56.20    2.38
   0   2 -16   54.62    2.31
   0   2 -16   53.43    2.38
   0  -2  15    1.12    0.73
   0  -2  15    1.85    0.86
   0   2 -15    1.92    0.86
   0   2 -15    0.79    0.86
   0  -2  14   -0.20    0.66
   0  -2  14    0.07    0.86
   0   2 -14    0.53    0.79
   0   2 -14   -0.07    0.79
   0  -2  12  127.93    3.76
   0  -2  12  128.12    3.90
   0   2 -12  134.33    4.03
   0   2 -12  122.05    3.63
   0  -2  11  169.34    4.76
   0  -2  11  175.41    4.95
   0   2 -11  161.28    4.56
   0   2 -11  167.16    4.82
   0  -2  10   38.44    1.65
   0  -2  10   37.51    1.52
   0   2 -10   35.93    1.52
   0   2 -10   36.59    1.59
   0  -2   9   59.37    1.98
   0  -2   9   58.25    2.05
   0   2  -9   58.91    1.98
   0   2  -9   57.26    1.98
   0  -2   8   65.38    2.05
   0  -2   8   62.61    2.11
   0   2  -7  108.25    4.16
   0   2  -7  110.16    4.23
   0  -2   7  107.65    3.04
   0  -2   7  106.33    3.10
   0   2  -7  104.88    3.04
   0   2  -7  105.14    2.97
   0  -2   6  336.36   12.75
   0  -2   6  317.67   12.02
   0   2  -6  320.38   12.15
   0   2  -6  316.02   11.95
   0  -2   6  335.24    8.59
   0  -2   6  325.99    8.32
   0   2  -6  333.06    8.59
   0   2  -6  339.53    8.65
   0  -2   5  113.00    4.36
   0  -2   5  113.13    4.36
   0   2  -5  110.95    4.29
   0   2  -5  110.69    4.23
   0  -2   5  103.03    2.84
   0  -2   5  106.20    2.97
   0   2  -5  109.17    3.04
   0   2  -5  107.06    2.97
   0  -2   4  644.72   24.30
   0  -2   4  657.00   24.77
   0   2  -4  632.24   23.84
   0   2  -4  635.41   23.97
   0  -2   4  611.43   15.32
   0  -2   4  622.92   15.52
   0   2  -4  631.64   15.78
   0   2  -4  622.26   15.52
   0  -2   3  215.50    8.19
   0  -2   3  209.23    7.93
   0   2  -3  213.25    8.12
   0   2  -3  225.80    8.59
   0  -2   3  214.18    5.48
   0  -2   3  218.14    5.61
   0   2  -3  219.66    5.68
   0   2  -3  213.06    5.48
   0  -2   2  292.90   11.10
   0  -2   2  295.08   11.16
   0   2  -2  286.03   10.83
   0   2  -2  262.85    9.97
   0  -2   2  275.34    7.00
   0  -2   2  283.92    7.20
   0   2  -2  268.86    6.80
   0   2  -2  281.28    7.13
   0  -2   1    0.99    0.33
   0  -2   1    0.79    0.33
   0   2  -1    1.65    0.33
   0   2  -1    1.06    0.40
   0  -2   1    1.19    0.40
   0  -2   1    1.32    0.46
   0   2  -1    1.32    0.40
   0   2  -1    1.06    0.46
   0  -2   0  112.34    4.36
   0  -2   0  110.03    4.23
   0   2   0  110.29    4.29
   0   2   0  112.80    4.36
   0  -2   0  103.69    2.71
   0  -2   0  101.31    2.64
   0   2   0   98.60    2.64
   0   2   0  103.49    2.71
   0  -2  -1   34.08    1.45
   0  -2  -1   35.14    1.45
   0   2   1   34.94    1.45
   0   2   1   32.36    1.39
   0  -2  -1   32.76    1.06
   0  -2  -1   32.36    1.06
   0   2   1   31.83    0.99
   0   2   1   33.81    1.06
   0  -2  -2  168.54    6.47
   0  -2  -2  167.29    6.41
   0   2   2  162.40    6.21
   0   2   2  171.71    6.60
   0  -2  -2  169.60    4.36
   0  -2  -2  171.98    4.42
   0   2   2  166.56    4.29
   0   2   2  167.42    4.36
   0  -2  -3   13.21    0.79
   0  -2  -3   15.59    0.86
   0   2   3   13.74    0.79
   0   2   3   13.47    0.79
   0  -2  -3   12.22    0.73
   0  -2  -3   13.74    0.73
   0   2   3   12.42    0.73
   0   2   3   12.28    0.73
   0  -2  -4  100.52    3.96
   0  -2  -4   92.06    3.63
   0   2   4   99.46    3.90
   0   2   4   98.21    3.83
   0  -2  -4  102.90    2.91
   0  -2  -4   97.68    2.77
   0   2   4  101.71    2.84
   0   2   4  101.91    2.84
   0  -2  -5    2.91    0.46
   0  -2  -5    3.30    0.46
   0   2   5    3.50    0.53
   0   2   5    2.77    0.53
   0  -2  -5    1.59    0.66
   0  -2  -5    3.24    0.66
   0   2   5    2.58    0.66
   0   2   5    3.43    0.66
   0  -2  -6 3291.61  123.70
   0  -2  -6 3118.58  117.23
   0   2   6 3251.99  122.25
   0   2   6 3194.53  120.07
   0  -2  -6 3239.44   80.04
   0  -2  -6 3114.62   77.01
   0   2   6 3243.40   80.11
   0   2   6 3265.20   80.71
   0   2   7   28.40    1.32
   0   2   7   27.28    1.32
   0  -2  -7   26.29    1.25
   0  -2  -7   29.32    1.32
   0   2   7   27.80    1.25
   0   2   7   26.81    1.25
   0   2   8  344.68   13.14
   0   2   8  339.99   12.94
   0  -2  -8  327.71    8.59
   0  -2  -8  342.96    8.98
   0   2   8  345.28    8.98
   0   2   8  340.65    8.92
   0   2   9    8.12    0.73
   0   2   9    9.11    0.66
   0  -2  -9    8.65    0.92
   0  -2  -9    9.84    0.92
   0   2   9   10.37    0.92
   0   2   9    8.98    0.92
   0   2  10   74.23    2.97
   0   2  10   72.12    2.97
   0  -2 -10   71.33    2.44
   0  -2 -10   67.83    2.31
   0   2  10   78.26    2.58
   0   2  10   76.02    2.51
   0   2  11  719.21   27.21
   0   2  11  747.61   28.27
   0  -2 -11  728.46   18.62
   0  -2 -11  704.02   17.96
   0   2  11  672.98   17.17
   0   2  11  695.44   17.77
   0   2  12  861.87   32.63
   0   2  12  838.09   31.70
   0  -2 -12  861.21   21.93
   0   2  12  828.85   21.07
   0   2  13   44.45    1.92
   0   2  13   45.83    2.05
   0  -2 -13   49.53    2.05
   0   2  13   45.17    1.98
   0  -2 -14    5.88    0.53
   0  -2 -14    6.01    0.53
   0   2  14    6.54    0.53
   0   2  14    6.14    0.59
   0  -2 -14    4.23    0.99
   0   2  14    7.00    0.99
   0   2  14    5.28    0.92
   0  -2 -15    0.99    0.40
   0  -2 -15    0.66    0.33
   0   2  15    1.45    0.40
   0   2  15    1.32    0.40
   0  -2 -15    1.25    0.86
   0  -2 -15    1.72    0.86
   0   2  15    1.12    0.79
   0   2  15    0.99    0.73
   0  -2 -16   18.56    0.86
   0  -2 -16   18.82    0.92
   0   2  16   18.62    0.92
   0  -2 -16   19.09    1.45
   0  -2 -16   18.56    1.32
   0   2  16   18.69    1.39
   0  -2 -17   21.13    1.45
   0  -2 -17   20.61    1.59
   0   2  17   18.62    1.45
   0   2  17   20.74    1.52
   0  -2 -18   22.79    1.72
   0  -2 -18   20.28    1.52
   0   2  18   20.87    1.52
   0   2  18   20.41    1.45
   0  -2 -19   -0.07    0.99
   0  -2 -19    0.73    0.92
   0   2  19    1.92    0.92
   0   2  19    0.26    0.86
   0  -2 -20   42.60    2.38
   0  -2 -20   39.10    2.11
   0   2  20   43.72    2.18
   0   2  20   43.72    2.25
   0  -2 -21   -0.40    0.92
   0  -2 -21   -0.53    0.99
   0   2  21    0.13    0.86
   0   2  21   -1.25    0.86
   0  -2 -23    3.24    1.19
   0  -2 -23    4.36    1.19
   0   2  23    2.97    1.06
   0   2  23    5.02    1.19
   0  -2 -24   -0.40    1.12
   0  -2 -24    2.71    1.12
   0   2  24    4.76    1.12
   0   2  24    4.09    1.12
   0  -3  23   -0.86    0.79
   0  -3  23    0.26    0.99
   0   3 -23   -0.73    1.06
   0   3 -23   -0.46    1.06
   0  -3  22    0.00    0.92
   0  -3  22   -0.66    0.86
   0   3 -22   -0.99    0.99
   0  -3  21    4.09    1.06
   0  -3  21    4.69    1.12
   0   3 -21    3.04    1.19
   0   3 -21    3.04    1.12
   0  -3  20    2.31    0.99
   0  -3  20    0.66    0.86
   0   3 -20    2.05    1.12
   0   3 -20    1.32    1.06
   0  -3  19   83.41    3.10
   0  -3  19   80.77    3.10
   0   3 -19   83.68    3.24
   0   3 -19   84.14    3.37
   0  -3  18   -0.20    0.86
   0  -3  18   -0.73    0.79
   0   3 -18    0.86    0.92
   0   3 -18    1.98    1.06
   0  -3  17    7.73    0.99
   0  -3  17    9.25    1.12
   0   3 -17   10.04    1.19
   0   3 -17   10.90    1.25
   0  -3  16    9.44    1.06
   0  -3  16   11.49    1.19
   0   3 -16    9.11    1.19
   0   3 -16    8.26    1.12
   0  -3  15   59.57    2.25
   0  -3  15   61.68    2.44
   0   3 -15   55.28    2.25
   0   3 -15   59.77    2.44
   0  -3  14   26.42    1.59
   0  -3  14   26.81    1.45
   0   3 -14   24.37    1.45
   0   3 -14   27.80    1.59
   0  -3  12    7.86    0.86
   0  -3  12    8.32    0.99
   0   3 -12    9.77    1.06
   0   3 -12    7.66    0.92
   0  -3  11    7.60    0.92
   0  -3  11    7.60    0.79
   0   3 -11    6.60    0.92
   0   3 -11    9.58    0.92
   0  -3  10  644.92   16.38
   0  -3  10  650.20   16.58
   0   3 -10  653.83   16.64
   0   3 -10  627.61   15.92
   0  -3   9   16.91    1.06
   0  -3   9   16.44    0.99
   0   3  -9   16.18    1.06
   0   3  -9   16.18    0.99
   0  -3   8  301.09   11.43
   0  -3   8  303.14   11.49
   0   3  -8  320.25   12.15
   0   3  -8  312.45   11.89
   0  -3   8  305.72    7.93
   0  -3   8  314.37    8.26
   0   3  -8  299.51    7.86
   0   3  -8  305.12    7.93
   0  -3   7  224.48    8.59
   0  -3   7  214.44    8.19
   0   3  -7  222.83    8.45
   0   3  -7  224.55    8.59
   0  -3   7  214.97    5.68
   0  -3   7  230.82    6.14
   0   3  -7  227.85    6.08
   0   3  -7  225.87    5.94
   0  -3   6   39.03    1.65
   0  -3   6   37.78    1.59
   0   3  -6   38.44    1.59
   0   3  -6   38.97    1.65
   0  -3   6   35.47    1.32
   0  -3   6   35.33    1.39
   0   3  -6   32.76    1.32
   0   3  -6   36.72    1.32
   0  -3   5  247.07    9.44
   0  -3   5  221.58    8.45
   0   3  -5  224.81    8.59
   0   3  -5  236.63    9.05
   0  -3   5  238.81    6.21
   0  -3   5  228.71    6.01
   0   3  -5  232.41    6.08
   0   3  -5  237.16    6.14
   0  -3   4  198.86    7.60
   0  -3   4  196.55    7.53
   0   3  -4  201.04    7.73
   0   3  -4  199.52    7.66
   0  -3   4  200.18    5.22
   0  -3   4  195.56    5.15
   0   3  -4  194.50    5.09
   0   3  -4  198.73    5.22
   0   3  -3 1816.86   68.36
   0   3  -3 1692.70   63.73
   0  -3   3 1581.08   39.16
   0  -3   3 1622.03   40.15
   0   3  -3 1577.78   39.03
   0   3  -3 1647.13   40.81
   0  -3   2  207.05    7.93
   0  -3   2  202.82    7.79
   0   3  -2  213.78    8.19
   0   3  -2  203.02    7.79
   0  -3   2  222.37    5.75
   0  -3   2  218.74    5.68
   0   3  -2  225.80    5.81
   0   3  -2  214.91    5.55
   0  -3   1  278.18   10.63
   0  -3   1  281.87   10.77
   0   3  -1  266.95   10.17
   0   3  -1  275.53   10.50
   0  -3   1  278.31    7.13
   0  -3   1  277.65    7.07
   0   3  -1  271.51    6.93
   0   3  -1  275.40    7.00
   0  -3   0  438.07   16.64
   0  -3   0  443.28   16.84
   0   3   0  431.46   16.38
   0   3   0  433.38   16.44
   0  -3   0  425.45   10.70
   0  -3   0  444.34   11.16
   0   3   0  433.44   10.90
   0   3   0  436.75   10.96
   0  -3  -1   80.38    3.24
   0  -3  -1   80.71    3.24
   0   3   1   76.08    3.10
   0   3   1   77.14    3.10
   0  -3  -1   83.61    2.38
   0  -3  -1   83.74    2.38
   0   3   1   83.28    2.38
   0   3   1   81.89    2.31
   0  -3  -2  561.04   21.27
   0  -3  -2  555.89   21.07
   0   3   2  560.51   21.20
   0   3   2  550.54   20.87
   0  -3  -2  550.34   13.80
   0  -3  -2  557.41   14.00
   0   3   2  541.82   13.60
   0   3   2  542.09   13.60
   0  -3  -3  618.10   23.38
   0  -3  -3  616.19   23.31
   0   3   3  608.00   22.98
   0   3   3  619.62   23.45
   0  -3  -3  617.31   15.45
   0  -3  -3  626.03   15.72
   0   3   3  596.70   14.99
   0   3   3  613.41   15.39
   0  -3  -4  459.66   17.44
   0  -3  -4  466.14   17.70
   0   3   4  469.70   17.83
   0   3   4  467.46   17.77
   0  -3  -4  453.46   11.49
   0  -3  -4  461.71   11.69
   0   3   4  449.16   11.36
   0   3   4  456.89   11.62
   0  -3  -5  134.00    5.28
   0  -3  -5  133.61    5.22
   0   3   5  132.88    5.22
   0   3   5  137.90    5.42
   0  -3  -5  139.42    3.83
   0  -3  -5  130.90    3.63
   0   3   5  134.46    3.76
   0   3   5  133.80    3.70
   0  -3  -6  130.96    5.15
   0  -3  -6  127.60    5.02
   0   3   6  122.44    4.82
   0   3   6  125.61    4.95
   0  -3  -6  129.45    3.63
   0  -3  -6  121.32    3.43
   0   3   6  126.08    3.57
   0   3   6  129.31    3.63
   0  -3  -7   82.75    3.37
   0  -3  -7   83.41    3.37
   0   3   7   88.83    3.63
   0   3   7   85.99    3.50
   0  -3  -7   81.96    2.58
   0  -3  -7   86.05    2.64
   0   3   7   85.20    2.64
   0   3   7   83.88    2.58
   0   3   8   98.07    3.90
   0   3   8  100.06    4.03
   0  -3  -8   90.74    2.84
   0  -3  -8   89.89    2.77
   0   3   8   97.15    2.97
   0   3   8   90.28    2.77
   0   3   9  402.47   15.39
   0   3   9  388.34   14.79
   0  -3  -9  381.73    9.97
   0  -3  -9  373.81    9.77
   0   3   9  379.55    9.91
   0   3   9  390.45   10.17
   0   3  10   32.36    1.65
   0   3  10   35.00    1.65
   0  -3 -10   33.75    1.59
   0  -3 -10   33.95    1.59
   0   3  10   33.02    1.59
   0   3  10   34.08    1.59
   0  -3 -11    0.79    0.53
   0  -3 -11   -0.20    0.26
   0   3  11    0.40    0.66
   0   3  11    0.79    0.53
   0  -3 -11    2.84    0.86
   0  -3 -11    1.32    0.86
   0   3  11   -0.73    0.73
   0   3  11    0.26    0.86
   0   3  12   13.27    0.92
   0   3  12   10.50    0.92
   0   3  13    5.02    0.73
   0   3  13    4.29    0.59
   0  -3 -13    6.60    0.99
   0  -3 -13    5.15    0.92
   0   3  13    6.34    0.99
   0   3  13    5.09    0.92
   0  -3 -14   -0.07    0.20
   0  -3 -14    0.53    0.53
   0   3  14    1.32    0.59
   0   3  14    1.06    0.46
   0  -3 -14    1.19    0.86
   0  -3 -14    0.73    0.86
   0   3  14    1.12    0.79
   0   3  14    0.40    0.86
   0   3  15    8.39    0.86
   0   3  15    8.19    0.73
   0  -3 -15    7.73    1.06
   0  -3 -15    6.80    1.06
   0   3  15    8.32    1.06
   0   3  15    8.26    1.06
   0   3  16   10.17    0.79
   0   3  16   10.90    0.86
   0  -3 -16   11.69    1.19
   0  -3 -16   13.74    1.32
   0   3  16   13.34    1.25
   0   3  16   14.13    1.25
   0  -3 -17   11.76    0.79
   0  -3 -17   10.10    0.79
   0   3  17   11.56    0.79
   0   3  17   11.16    0.86
   0  -3 -17   11.23    1.25
   0  -3 -17   12.68    1.25
   0   3  17   12.55    1.25
   0  -3 -18   19.09    0.99
   0  -3 -18   17.90    1.06
   0  -3 -18   18.03    1.45
   0  -3 -18   18.76    1.59
   0   3  18   20.28    1.52
   0   3  18   21.60    1.52
   0   3  19    7.93    0.53
   0  -3 -19    9.64    1.32
   0  -3 -19    9.38    1.19
   0   3  19    9.97    1.25
   0   3  19    8.59    1.12
   0  -3 -20    1.98    0.99
   0  -3 -20    0.86    1.06
   0   3  20    2.18    0.99
   0   3  20    0.53    0.99
   0  -3 -21    0.07    0.99
   0  -3 -21   -1.39    0.99
   0   3  21    0.13    0.99
   0   3  21    1.25    0.99
   0  -3 -22   -0.99    0.99
   0  -3 -23    1.19    0.99
   0  -3 -23    1.72    1.06
   0   3  23    1.06    0.92
   0   3  23    0.13    0.92
   0  -3 -24    9.25    1.59
   0  -3 -24    8.78    1.32
   0   3  24   12.09    1.45
   0   3  24    9.18    1.39
   0  -4  23   -0.46    0.92
   0  -4  23   -1.12    0.92
   0   4 -23    0.00    0.99
   0   4 -23   -0.07    0.99
   0  -4  22    2.51    1.19
   0  -4  22    1.85    0.99
   0   4 -22    1.78    1.06
   0  -4  21    8.78    1.19
   0  -4  21    7.79    1.19
   0   4 -21    7.66    1.32
   0   4 -21    6.01    1.25
   0  -4  20   10.17    1.25
   0  -4  20   10.90    1.25
   0   4 -20    8.12    1.39
   0   4 -20    7.79    1.32
   0  -4  19   -0.59    0.86
   0  -4  19    0.73    0.86
   0   4 -19    0.79    0.99
   0   4 -19    1.19    1.06
   0  -4  18   32.82    1.85
   0  -4  18   29.98    1.65
   0   4 -18   26.48    1.85
   0   4 -18   32.30    1.85
   0  -4  17   30.97    1.85
   0  -4  17   32.10    1.72
   0   4 -17   30.91    1.78
   0   4 -17   27.61    1.78
   0  -4  16   72.71    2.77
   0  -4  16   79.05    2.84
   0   4 -16   73.04    2.91
   0   4 -16   74.03    2.77
   0  -4  15    2.11    0.86
   0  -4  15    2.25    0.79
   0   4 -15    0.86    0.92
   0   4 -15    0.53    0.79
   0  -4  14   17.96    1.32
   0  -4  14   19.55    1.25
   0   4 -14   18.36    1.25
   0   4 -14   17.57    1.32
   0  -4  13  130.30    4.03
   0  -4  13  126.74    3.90
   0   4 -13  128.26    3.90
   0  -4  12   16.71    1.19
   0   4 -12   19.15    1.32
   0  -4  11  148.60    5.68
   0  -4  11  148.00    4.36
   0  -4  11  150.18    4.29
   0   4 -11  151.31    4.29
   0   4 -11  151.77    4.49
   0  -4  10    1.25    0.40
   0  -4  10    1.25    0.33
   0   4 -10    1.12    0.33
   0   4 -10    1.65    0.40
   0  -4  10    0.13    0.73
   0  -4  10    0.07    0.59
   0   4 -10   -0.46    0.73
   0   4  -9    3.17    0.46
   0   4  -9    3.96    0.53
   0  -4   9    2.11    0.66
   0  -4   9    2.77    0.73
   0   4  -9    2.58    0.73
   0   4  -9    3.24    0.66
   0  -4   8   36.39    1.59
   0  -4   8   39.30    1.72
   0   4  -8   37.78    1.65
   0   4  -8   40.88    1.78
   0  -4   8   37.78    1.52
   0  -4   8   38.44    1.52
   0   4  -8   37.84    1.45
   0   4  -8   35.60    1.52
   0  -4   7  417.99   15.85
   0  -4   7  436.35   16.58
   0  -4   7  455.11   11.69
   0  -4   7  450.22   11.49
   0   4  -7  459.93   11.82
   0   4  -7  454.18   11.56
   0  -4   6    8.98    0.73
   0  -4   6    8.12    0.66
   0   4  -6    9.11    0.66
   0   4  -6    8.06    0.66
   0  -4   6    8.72    0.79
   0  -4   6    7.86    0.73
   0   4  -6    8.06    0.73
   0   4  -6    8.19    0.86
   0  -4   5  272.89   10.43
   0  -4   5  251.36    9.64
   0   4  -5  279.96   10.70
   0   4  -5  271.84   10.43
   0  -4   5  266.09    7.00
   0  -4   5  259.88    6.74
   0   4  -5  264.37    6.87
   0   4  -5  269.52    7.07
   0  -4   4  248.19    9.51
   0  -4   4  240.66    9.25
   0   4  -4  243.24    9.31
   0   4  -4  241.72    9.31
   0  -4   4  250.64    6.54
   0  -4   4  257.24    6.67
   0   4  -4  249.64    6.54
   0   4  -4  243.24    6.34
   0  -4   3   90.35    3.63
   0  -4   3   83.28    3.37
   0   4  -3   78.33    3.17
   0   4  -3   84.67    3.43
   0  -4   3   86.32    2.58
   0  -4   3   84.54    2.44
   0   4  -3   82.42    2.44
   0   4  -3   85.79    2.51
   0  -4   2 2320.11   87.31
   0  -4   2 2206.52   83.02
   0   4  -2 2216.42   83.41
   0   4  -2 2260.67   85.06
   0  -4   2 2313.51   57.26
   0  -4   2 2216.42   54.82
   0   4  -2 2215.10   54.82
   0   4  -2 2326.06   57.52
   0  -4   1 2013.01   75.75
   0  -4   1 2013.01   75.75
   0   4  -1 2028.20   76.35
   0   4  -1 2022.92   76.15
   0  -4   1 2121.98   52.50
   0  -4   1 2001.12   49.47
   0   4  -1 2074.43   51.32
   0   4  -1 2043.39   50.59
   0  -4   0  124.89    4.95
   0  -4   0  118.42    4.69
   0   4   0  123.50    4.89
   0   4   0  122.71    4.89
   0  -4   0  124.36    3.43
   0  -4   0  127.07    3.43
   0   4   0  123.57    3.43
   0   4   0  125.35    3.43
   0  -4  -1    5.68    0.66
   0  -4  -1    4.03    0.66
   0   4   1    4.16    0.66
   0   4   1    5.35    0.73
   0  -4  -1    5.15    0.73
   0  -4  -1    3.90    0.66
   0   4   1    5.22    0.73
   0   4   1    4.89    0.66
   0  -4  -2  609.91   23.12
   0  -4  -2  632.63   23.97
   0   4   2  615.46   23.31
   0   4   2  598.16   22.72
   0  -4  -2  599.08   15.12
   0  -4  -2  594.13   14.93
   0   4   2  585.67   14.79
   0   4   2  581.05   14.60
   0  -4  -3 2210.48   83.21
   0  -4  -3 2247.46   84.60
   0   4   3 2211.80   83.28
   0   4   3 2218.40   83.55
   0  -4  -3 2250.11   55.67
   0  -4  -3 2221.05   54.95
   0   4   3 2246.14   55.61
   0   4   3 2147.08   53.17
   0  -4  -4 2172.83   81.76
   0  -4  -4 2203.21   82.95
   0   4   4 2199.91   82.82
   0   4   4 2188.02   82.36
   0  -4  -4 2238.88   55.48
   0  -4  -4 2217.08   54.88
   0   4   4 2154.34   53.36
   0   4   4 2252.75   55.81
   0  -4  -5   92.79    3.76
   0  -4  -5   93.06    3.76
   0   4   5   92.13    3.76
   0   4   5   89.56    3.70
   0  -4  -5   89.89    2.71
   0  -4  -5   93.91    2.77
   0   4   5   90.35    2.77
   0   4   5   92.59    2.77
   0  -4  -6  252.22    9.77
   0  -4  -6  251.49    9.71
   0   4   6  245.68    9.51
   0   4   6  254.60    9.84
   0  -4  -6  247.33    6.60
   0  -4  -6  249.31    6.60
   0   4   6  251.30    6.67
   0   4   6  252.15    6.74
   0  -4  -7  402.14   15.39
   0  -4  -7  408.88   15.59
   0   4   7  403.79   15.39
   0   4   7  421.03   16.11
   0  -4  -7  405.05   10.50
   0  -4  -7  405.11   10.50
   0   4   7  400.29   10.37
   0   4   7  403.86   10.50
   0   4   8   45.31    2.05
   0   4   8   45.37    2.11
   0  -4  -8   40.35    1.65
   0  -4  -8   44.05    1.72
   0   4   8   44.71    1.78
   0   4   8   40.02    1.65
   0   4   9   42.53    1.98
   0   4   9   39.03    1.92
   0  -4  -9   39.56    1.72
   0  -4  -9   35.53    1.59
   0   4   9   38.57    1.65
   0   4   9   37.25    1.65
   0   4  10    8.19    0.79
   0   4  10    7.00    0.86
   0  -4 -10    7.13    0.92
   0  -4 -10    5.48    0.92
   0   4  10    6.54    0.92
   0   4  10    8.78    0.99
   0   4  11   95.43    3.90
   0   4  11   94.44    3.96
   0  -4 -12   73.37    2.64
   0  -4 -12   72.05    2.64
   0   4  12   74.10    2.64
   0   4  12   76.28    2.71
   0   4  13   13.27    0.99
   0   4  13   15.45    1.19
   0  -4 -13   15.78    1.19
   0  -4 -13   15.98    1.25
   0   4  13   14.40    1.19
   0   4  13   13.60    1.19
   0   4  14   14.53    0.99
   0   4  14   13.14    1.12
   0  -4 -14   16.84    1.25
   0  -4 -14   17.04    1.32
   0   4  14   15.85    1.25
   0   4  14   18.89    1.32
   0   4  15   38.70    1.92
   0   4  15   39.03    2.11
   0   4  15   41.28    1.98
   0   4  15   40.75    1.98
   0  -4 -16    0.26    0.26
   0  -4 -16    0.33    0.53
   0   4  16    0.00    0.53
   0   4  16    0.00    0.66
   0  -4 -16   -0.33    0.79
   0  -4 -16    1.65    0.92
   0   4  16    0.86    0.86
   0   4  16    0.20    0.86
   0   4  17    4.36    0.73
   0   4  17    5.55    0.79
   0  -4 -17    5.15    0.99
   0  -4 -17    5.28    1.06
   0   4  17    4.89    1.12
   0   4  17    5.68    1.06
   0   4  18    1.06    0.53
   0   4  18    1.19    0.66
   0  -4 -18    3.90    0.92
   0  -4 -18    0.99    0.99
   0   4  18    3.70    1.06
   0   4  18    1.98    0.92
   0  -4 -19   28.27    1.78
   0  -4 -19   24.24    1.85
   0   4  19   36.19    2.25
   0   4  19   31.57    1.85
   0  -4 -20    4.09    0.59
   0  -4 -20    2.84    0.59
   0  -4 -20    3.24    1.06
   0  -4 -20    1.32    1.12
   0   4  20    5.61    1.06
   0   4  20    3.04    1.06
   0  -4 -21    4.09    0.53
   0   4  21    5.22    0.46
   0  -4 -21    4.23    1.19
   0   4  21    5.09    1.19
   0  -4 -22    1.12    0.99
   0  -4 -22    0.86    1.12
   0   4  22   -0.86    0.92
   0   4  22    0.40    0.92
   0  -4 -23   -0.07    0.92
   0  -4 -23    0.20    0.99
   0   4  23    0.92    0.99
   0   4  23    0.20    0.92
   0  -4 -24   -0.40    0.86
   0  -4 -24    1.45    1.06
   0   4  24    0.13    0.99
   0   4  24   -0.46    0.99
   0  -5  21    4.42    1.12
   0  -5  21    4.89    0.99
   0   5 -21    2.77    1.12
   0   5 -21    4.69    1.19
   0  -5  20    2.25    0.99
   0  -5  20    0.20    0.86
   0   5 -20   -0.33    0.99
   0   5 -20    0.73    0.92
   0  -5  19   30.25    1.85
   0  -5  19   28.20    1.72
   0   5 -19   26.68    1.92
   0   5 -19   28.20    1.85
   0  -5  18   25.36    1.65
   0  -5  18   22.72    1.52
   0   5 -18   26.15    1.72
   0   5 -18   25.62    1.85
   0  -5  17    3.43    0.99
   0  -5  17    3.17    0.86
   0   5 -17    3.24    1.06
   0   5 -17    2.64    0.92
   0  -5  16    2.91    0.79
   0  -5  16    2.25    0.92
   0   5 -16    2.11    0.99
   0   5 -16    2.51    0.92
   0  -5  15    9.97    1.06
   0  -5  15    9.58    1.12
   0   5 -15   10.30    1.19
   0   5 -15   10.30    1.06
   0  -5  14   28.27    1.59
   0  -5  14   28.27    1.45
   0   5 -14   26.95    1.65
   0   5 -14   32.23    1.65
   0  -5  13    7.13    0.99
   0  -5  13    7.93    0.92
   0   5 -13    8.12    1.06
   0   5 -13    8.39    0.92
   0  -5  12    6.01    0.40
   0  -5  12    6.47    0.53
   0   5 -12    5.55    0.92
   0  -5  11   52.44    2.18
   0  -5  11   53.76    2.31
   0   5 -11   53.30    2.18
   0   5 -11   53.76    2.25
   0  -5  11   51.45    2.05
   0  -5  11   51.45    1.92
   0   5 -11   50.59    2.05
   0  -5  10  182.87    7.13
   0  -5  10  179.90    6.93
   0   5 -10  192.19    7.46
   0   5 -10  184.13    7.13
   0  -5  10  179.24    5.02
   0  -5  10  184.99    5.22
   0   5 -10  190.34    5.42
   0   5 -10  183.93    5.09
   0  -5   9   51.78    2.31
   0  -5   9   51.78    2.18
   0   5  -9   54.62    2.38
   0   5  -9   53.23    2.25
   0  -5   9   58.58    2.05
   0  -5   9   54.62    1.92
   0  -5   8  779.31   29.52
   0  -5   8  773.37   29.26
   0   5  -8  759.50   28.73
   0   5  -8  820.92   31.11
   0  -5   8  764.12   19.28
   0  -5   8  768.75   19.42
   0   5  -8  764.12   19.35
   0   5  -8  764.78   19.28
   0  -5   7    0.53    0.59
   0  -5   7    1.85    0.53
   0   5  -7    1.12    0.53
   0   5  -7    0.59    0.53
   0  -5   7    1.98    0.66
   0  -5   7    1.72    0.66
   0   5  -7    3.50    0.79
   0   5  -7    1.85    0.59
   0  -5   6  174.62    6.87
   0  -5   6  162.73    6.34
   0   5  -6  179.37    7.07
   0   5  -6  162.14    6.34
   0  -5   6  165.97    4.62
   0  -5   6  161.74    4.42
   0   5  -6  173.83    4.82
   0   5  -6  167.75    4.56
   0  -5   5   12.09    0.92
   0  -5   5   11.62    0.86
   0   5  -5   13.14    0.92
   0   5  -5   13.21    0.92
   0  -5   5   11.36    0.92
   0  -5   5   13.01    0.86
   0   5  -5   13.41    0.86
   0   5  -5   13.01    0.99
   0  -5   4  179.24    7.00
   0  -5   4  170.99    6.67
   0   5  -4  171.78    6.74
   0   5  -4  170.39    6.67
   0  -5   4  173.30    4.69
   0  -5   4  172.44    4.76
   0   5  -4  174.29    4.69
   0   5  -4  171.45    4.69
   0  -5   3   87.64    3.57
   0  -5   3   88.10    3.63
   0   5  -3   88.37    3.63
   0   5  -3   83.88    3.50
   0  -5   3   97.22    2.77
   0  -5   3   92.73    2.77
   0   5  -3   96.16    2.84
   0   5  -3   92.66    2.71
   0  -5   2  573.59   21.79
   0  -5   2  596.84   22.65
   0   5  -2  609.38   23.18
   0   5  -2  585.48   22.26
   0  -5   2  619.22   15.65
   0  -5   2  617.84   15.59
   0   5  -2  632.57   15.92
   0   5  -2  619.22   15.65
   0  -5   1  165.77    6.54
   0  -5   1  164.51    6.47
   0   5  -1  163.06    6.41
   0   5  -1  157.98    6.21
   0  -5   1  174.75    4.69
   0  -5   1  171.25    4.69
   0   5  -1  172.44    4.62
   0   5  -1  174.16    4.76
   0  -5   0  872.44   33.02
   0  -5   0  865.17   32.76
   0   5   0  862.53   32.69
   0   5   0  863.85   32.69
   0  -5   0  857.25   21.46
   0  -5   0  879.04   22.06
   0   5   0  877.06   21.99
   0   5   0  877.72   21.99
   0  -5  -1  320.38   12.28
   0  -5  -1  322.62   12.42
   0   5   1  321.30   12.35
   0   5   1  310.87   11.95
   0  -5  -1  321.17    8.32
   0  -5  -1  324.80    8.39
   0   5   1  322.23    8.32
   0   5   1  316.81    8.26
   0  -5  -2  665.72   25.29
   0  -5  -2  644.19   24.44
   0   5   2  641.88   24.37
   0   5   2  631.18   23.97
   0  -5  -2  634.35   15.98
   0  -5  -2  642.08   16.25
   0   5   2  609.52   15.39
   0   5   2  631.31   15.98
   0  -5  -3  489.91   18.69
   0  -5  -3  487.27   18.56
   0   5   3  492.09   18.76
   0   5   3  498.36   19.02
   0  -5  -3  511.11   13.01
   0  -5  -3  508.27   12.94
   0   5   3  501.47   12.81
   0   5   3  510.45   13.01
   0  -5  -4   29.06    1.52
   0  -5  -4   28.07    1.45
   0   5   4   25.23    1.45
   0   5   4   24.90    1.39
   0  -5  -4   28.99    1.32
   0  -5  -4   29.39    1.32
   0   5   4   30.38    1.32
   0   5   4   30.12    1.39
   0  -5  -5   42.47    1.98
   0  -5  -5   42.73    1.98
   0   5   5   42.93    1.98
   0   5   5   43.99    2.05
   0  -5  -5   43.99    1.65
   0  -5  -5   42.27    1.65
   0   5   5   37.38    1.52
   0   5   5   39.63    1.65
   0  -5  -6   21.20    1.25
   0  -5  -6   23.51    1.32
   0   5   6   17.63    1.19
   0   5   6   16.44    1.12
   0  -5  -6   19.61    1.19
   0  -5  -6   18.62    1.19
   0   5   6   14.20    1.12
   0   5   6   13.41    1.06
   0  -5  -7   74.10    3.17
   0  -5  -7   74.83    3.17
   0   5   7   72.65    3.10
   0   5   7   76.28    3.30
   0  -5  -7   74.70    2.44
   0  -5  -7   68.22    2.31
   0   5   7   70.86    2.38
   0   5   7   66.90    2.31
   0  -5  -8  208.83    8.19
   0  -5  -8  206.32    8.06
   0   5   8  206.85    8.12
   0   5   8  199.45    7.79
   0  -5  -8  199.91    5.55
   0  -5  -8  197.87    5.48
   0   5   8  198.26    5.48
   0   5   8  196.28    5.48
   0   5   9  120.13    4.95
   0   5   9  115.11    4.69
   0  -5  -9  119.94    3.63
   0  -5  -9  120.93    3.63
   0   5   9  120.40    3.70
   0   5   9  119.47    3.63
   0   5  10  117.82    4.76
   0   5  10  120.07    4.95
   0   5  11    2.64    0.73
   0   5  11    2.31    0.66
   0  -5 -11    2.44    0.79
   0  -5 -11    1.45    0.79
   0   5  11   -0.20    0.73
   0   5  11    0.66    0.86
   0   5  12  138.56    5.68
   0  -5 -12  136.84    4.16
   0  -5 -12  138.49    4.16
   0   5  12  136.31    4.16
   0   5  12  140.74    4.29
   0   5  13   13.60    1.19
   0   5  13   13.01    1.06
   0  -5 -13   13.41    1.19
   0  -5 -13   14.66    1.25
   0   5  13   13.41    1.25
   0   5  13   14.40    1.25
   0   5  14  205.40    8.26
   0   5  14  204.07    8.06
   0  -5 -14  206.12    5.94
   0  -5 -14  195.95    5.75
   0   5  14  195.82    5.68
   0   5  14  208.90    6.08
   0   5  15   47.95    2.31
   0   5  15   46.30    2.44
   0  -5 -15   45.24    2.18
   0  -5 -15   46.16    2.11
   0   5  15   45.64    2.11
   0   5  15   47.88    2.18
   0  -5 -16   -0.07    0.26
   0  -5 -16    0.40    0.59
   0   5  16   -0.07    0.79
   0   5  16    0.59    0.66
   0  -5 -16   -0.53    0.86
   0  -5 -16    0.73    0.86
   0   5  16   -0.33    0.86
   0   5  16   -0.40    0.86
   0   5  17   26.55    1.78
   0   5  17   24.04    1.59
   0  -5 -17   25.16    1.59
   0  -5 -17   24.44    1.72
   0   5  17   27.47    1.78
   0   5  17   25.49    1.65
   0   5  18   21.53    1.59
   0   5  18   21.86    1.52
   0  -5 -18   20.01    1.65
   0  -5 -18   20.54    1.52
   0   5  18   21.53    1.59
   0   5  19   12.61    1.25
   0   5  19   10.30    1.12
   0  -5 -19   10.43    1.32
   0  -5 -19   11.56    1.19
   0   5  19   11.43    1.39
   0   5  19    9.05    1.19
   0   5  20    8.65    0.99
   0   5  20    6.67    0.86
   0  -5 -20    7.07    1.32
   0  -5 -20    7.26    1.19
   0   5  20    7.60    1.32
   0   5  20    9.84    1.25
   0   5  21   13.08    1.06
   0   5  21   12.81    1.12
   0  -5 -21   10.90    1.39
   0  -5 -22    0.46    0.53
   0  -5 -22    0.59    0.53
   0  -5 -22    0.92    1.12
   0  -5 -22   -0.46    0.86
   0   5  22   -0.86    0.92
   0   5  22   -0.20    0.99
   0  -5 -23    0.73    0.99
   0  -5 -23    2.31    0.92
   0   5  23    0.73    0.92
   0   5  23    1.19    0.99
   0  -5 -24    2.91    1.12
   0  -5 -24    2.51    0.99
   0   5  24    1.72    1.06
   0   5  24    0.46    1.06
   0  -6  22    0.40    0.92
   0  -6  22   -0.26    0.92
   0   6 -22    0.79    1.06
   0  -6  21    1.45    0.92
   0  -6  21    3.50    1.06
   0   6 -21    2.71    1.19
   0   6 -21    2.51    1.06
   0  -6  20    0.59    0.86
   0  -6  20    1.19    0.99
   0   6 -20    2.25    1.06
   0   6 -20    1.32    1.06
   0  -6  19    7.66    1.25
   0  -6  19    7.00    1.06
   0   6 -19    4.76    1.19
   0   6 -19    5.61    1.19
   0  -6  18    1.52    0.92
   0  -6  18    2.71    0.86
   0   6 -18    3.43    1.06
   0   6 -18    2.91    1.12
   0  -6  17    7.00    1.19
   0  -6  17    5.48    0.92
   0   6 -17    6.34    1.12
   0   6 -17    7.53    1.19
   0  -6  16    5.75    1.06
   0  -6  16    4.09    0.86
   0   6 -16    5.02    0.99
   0   6 -16    2.77    0.99
   0  -6  15   26.88    1.65
   0  -6  15   27.80    1.52
   0   6 -15   27.87    1.59
   0   6 -15   24.70    1.65
   0  -6  14    4.29    0.99
   0  -6  14    4.23    0.86
   0   6 -14    4.36    0.99
   0   6 -14    4.36    0.86
   0  -6  13    0.73    0.46
   0  -6  13    0.66    0.33
   0   6 -13    0.00    0.46
   0   6 -13    0.79    0.33
   0  -6  13    0.46    0.79
   0  -6  13    0.59    0.66
   0   6 -13   -0.79    0.79
   0   6 -13    0.86    0.73
   0  -6  12    7.73    0.73
   0  -6  12    8.06    0.66
   0   6 -12    8.59    0.66
   0   6 -12    8.59    0.73
   0  -6  12    7.20    0.99
   0  -6  12    8.26    0.86
   0   6 -12    8.85    1.06
   0   6 -12    7.60    0.92
   0  -6  11   -0.26    0.53
   0  -6  11    0.40    0.40
   0   6 -11    0.13    0.46
   0   6 -11    0.79    0.59
   0  -6  10   45.77    2.05
   0  -6  10   49.40    2.25
   0   6 -10   52.64    2.38
   0   6 -10   46.89    2.05
   0  -6  10   43.46    1.85
   0  -6  10   48.74    1.85
   0   6 -10   48.41    1.98
   0  -6   9   87.05    3.57
   0  -6   9   87.90    3.70
   0   6  -9   86.19    3.57
   0   6  -9   81.96    3.37
   0  -6   9   85.79    2.71
   0  -6   9   87.18    2.84
   0   6  -9   87.57    2.91
   0   6  -9   90.35    2.84
   0   6  -8   40.81    1.92
   0   6  -8   35.66    1.65
   0  -6   8   37.64    1.59
   0  -6   8   37.05    1.52
   0  -6   7  143.45    5.68
   0  -6   7  153.35    6.14
   0   6  -7  158.17    6.27
   0   6  -7  152.76    6.01
   0  -6   7  147.94    4.23
   0  -6   7  147.15    4.16
   0   6  -7  150.05    4.29
   0   6  -7  141.66    3.96
   0  -6   6   95.30    3.90
   0  -6   6   93.12    3.90
   0  -6   6   96.09    2.97
   0  -6   6   96.75    2.91
   0   6  -6   95.17    2.97
   0   6  -6   93.85    2.77
   0  -6   5   23.18    1.25
   0  -6   5   20.87    1.25
   0  -6   5   21.33    1.19
   0  -6   5   20.14    1.06
   0   6  -5   18.16    1.12
   0   6  -5   21.07    1.12
   0  -6   4    3.37    0.66
   0  -6   4    1.85    0.66
   0   6  -4    2.84    0.66
   0   6  -4    2.97    0.66
   0  -6   4    3.50    0.66
   0  -6   4    4.42    0.79
   0   6  -4    1.85    0.79
   0   6  -4    2.77    0.66
   0  -6   3   38.64    1.85
   0  -6   3   42.33    1.98
   0   6  -3   42.33    1.98
   0   6  -3   42.80    2.05
   0  -6   3   39.76    1.65
   0  -6   3   41.34    1.52
   0   6  -3   40.62    1.65
   0   6  -3   40.48    1.52
   0  -6   2  313.18   12.09
   0  -6   2  316.02   12.22
   0   6  -2  310.01   11.95
   0   6  -2  330.02   12.75
   0  -6   2  320.91    8.39
   0  -6   2  320.25    8.32
   0   6  -2  323.75    8.39
   0   6  -2  324.80    8.52
   0  -6   1  113.26    4.62
   0  -6   1  111.94    4.56
   0   6  -1  108.77    4.42
   0   6  -1  109.37    4.49
   0  -6   1  115.11    3.37
   0  -6   1  112.74    3.24
   0   6  -1  111.75    3.30
   0   6  -1  112.08    3.24
   0  -6   0   32.30    1.65
   0  -6   0   33.81    1.72
   0   6   0   33.15    1.72
   0   6   0   32.56    1.65
   0  -6   0   29.46    1.32
   0  -6   0   29.72    1.25
   0   6   0   28.27    1.25
   0   6   0   28.07    1.32
   0  -6  -1  158.11    6.27
   0  -6  -1  158.57    6.27
   0   6   1  155.73    6.21
   0   6   1  156.59    6.27
   0  -6  -1  153.35    4.29
   0  -6  -1  157.91    4.36
   0   6   1  151.77    4.29
   0   6   1  149.13    4.16
   0  -6  -2  154.08    6.14
   0  -6  -2  155.66    6.21
   0   6   2  145.63    5.81
   0   6   2  146.09    5.88
   0  -6  -2  137.44    3.96
   0  -6  -2  131.43    3.76
   0  -6  -3  987.35   37.38
   0  -6  -3  994.62   37.64
   0   6   3  958.29   36.32
   0   6   3  991.97   37.58
   0  -6  -3  989.33   24.83
   0  -6  -3 1010.47   25.29
   0   6   3 1019.71   25.62
   0   6   3 1001.22   25.10
   0  -6  -4   50.72    2.31
   0  -6  -4   51.51    2.38
   0   6   4   49.73    2.31
   0   6   4   51.25    2.31
   0  -6  -4   52.83    1.92
   0  -6  -4   55.87    1.98
   0   6   4   55.54    1.92
   0   6   4   56.34    2.05
   0  -6  -5  305.25   11.82
   0  -6  -5  297.92   11.56
   0   6   5  297.46   11.56
   0   6   5  295.55   11.43
   0  -6  -5  301.95    7.99
   0  -6  -5  299.97    7.93
   0   6   5  300.83    7.99
   0   6   5  293.43    7.79
   0  -6  -6    7.46    0.86
   0  -6  -6    7.66    0.86
   0   6   6    6.67    0.86
   0   6   6    6.34    0.86
   0  -6  -6    6.27    0.86
   0  -6  -6    6.60    0.86
   0   6   6    6.08    0.92
   0   6   6    7.66    0.86
   0  -6  -7  250.37    9.77
   0  -6  -7  244.96    9.58
   0   6   7  233.93    9.18
   0   6   7  252.35    9.91
   0  -6  -7  231.09    6.34
   0  -6  -7  227.85    6.27
   0   6   7  231.22    6.34
   0   6   7  230.95    6.34
   0  -6  -8    2.18    0.73
   0  -6  -8    2.44    0.66
   0   6   8    0.92    0.79
   0   6   8    1.45    0.66
   0  -6  -8    0.46    0.79
   0  -6  -8    0.13    0.73
   0   6   8    1.59    0.79
   0   6   8   -0.07    0.73
   0  -6  -9   68.69    2.97
   0  -6  -9   74.50    3.24
   0   6   9   71.72    3.10
   0   6   9   71.72    3.24
   0   6  10  170.79    6.80
   0   6  10  183.73    7.40
   0  -6 -10  184.99    5.28
   0  -6 -10  184.39    5.28
   0   6  10  180.23    5.15
   0   6  10  182.35    5.28
   0   6  11   56.60    2.71
   0   6  11   56.20    2.58
   0  -6 -11   53.63    2.18
   0  -6 -11   54.95    2.18
   0   6  11   55.87    2.25
   0   6  11   53.96    2.18
   0   6  12   50.59    2.51
   0   6  12   50.33    2.38
   0  -6 -12   49.47    2.05
   0  -6 -12   45.11    1.98
   0   6  12   50.66    2.11
   0   6  12   46.10    2.05
   0   6  13   19.22    1.39
   0   6  13   17.57    1.25
   0  -6 -13   18.82    1.32
   0  -6 -13   18.16    1.32
   0   6  13   21.00    1.45
   0   6  13   18.76    1.32
   0   6  14    9.84    0.99
   0   6  14    8.52    1.12
   0  -6 -14    7.53    1.06
   0  -6 -14    8.12    1.12
   0   6  14    9.64    1.12
   0   6  14    9.91    1.19
   0   6  15   54.49    2.64
   0   6  15   52.97    2.77
   0  -6 -15   56.40    2.38
   0  -6 -15   60.63    2.58
   0   6  15   50.19    2.31
   0   6  15   52.64    2.25
   0   6  16   46.82    2.38
   0   6  16   47.49    2.64
   0  -6 -16   43.39    2.18
   0   6  16   47.55    2.18
   0   6  16   49.40    2.31
   0  -6 -17   56.47    2.58
   0  -6 -17   59.70    2.51
   0   6  17   55.87    2.58
   0   6  17   56.53    2.51
   0   6  18   37.05    2.31
   0   6  18   34.28    2.11
   0  -6 -18   39.03    1.98
   0  -6 -18   38.37    2.18
   0   6  18   36.26    2.11
   0  -6 -19   16.58    1.52
   0  -6 -19   16.05    1.32
   0   6  19   15.26    1.39
   0   6  19   17.24    1.59
   0   6  20   12.68    1.25
   0   6  20   13.34    1.32
   0  -6 -20   10.83    1.45
   0  -6 -21   -0.07    0.40
   0  -6 -21    0.99    0.73
   0   6  21    1.32    0.79
   0   6  21    0.46    0.66
   0  -6 -21    0.79    0.92
   0  -6 -21    0.00    0.99
   0   6  21    1.32    1.06
   0   6  21    1.52    0.99
   0   6  22    4.23    0.86
   0   6  22    7.33    1.06
   0  -6 -22    6.14    1.06
   0  -6 -22    5.02    1.19
   0   6  22    5.42    1.06
   0   6  22    5.22    1.25
   0  -6 -23    0.33    0.92
   0  -6 -23   -0.13    0.92
   0   6  23    1.06    0.86
   0   6  23    0.53    0.99
   0  -6 -24    1.85    0.92
   0  -6 -24    1.59    1.06
   0   6  24    0.99    1.06
   0   6  24    0.40    1.12
   0  -7  20    4.16    1.06
   0  -7  20    3.96    0.99
   0   7 -20    3.63    1.19
   0   7 -20    3.04    1.12
   0  -7  19   10.90    1.32
   0  -7  19    9.11    1.12
   0   7 -19    8.65    1.32
   0   7 -19    9.77    1.32
   0  -7  18   40.35    2.11
   0  -7  18   44.65    2.18
   0   7 -18   44.65    2.25
   0   7 -18   39.96    2.31
   0  -7  17    1.65    0.92
   0  -7  17    0.86    0.79
   0   7 -17   -1.32    0.92
   0   7 -17    0.73    0.99
   0  -7  16    4.03    0.86
   0  -7  16    3.76    0.99
   0   7 -16    2.44    0.92
   0   7 -16    2.84    0.99
   0  -7  15    8.45    0.99
   0  -7  15   12.35    1.25
   0   7 -15   10.30    1.25
   0   7 -15   10.10    1.12
   0  -7  14   16.18    0.86
   0  -7  14   17.83    1.06
   0   7 -14   17.30    0.99
   0   7 -14   18.23    0.99
   0  -7  14   16.71    1.19
   0  -7  14   14.86    1.25
   0   7 -14   17.70    1.45
   0   7 -14   17.63    1.25
   0  -7  13    0.20    0.59
   0  -7  13    0.20    0.46
   0   7 -13    0.86    0.59
   0   7 -13   -0.13    0.53
   0  -7  13   -0.33    0.66
   0  -7  13   -0.73    0.79
   0   7 -13   -0.86    0.86
   0   7 -13   -0.92    0.73
   0  -7  12    2.38    0.66
   0  -7  12    2.58    0.53
   0   7 -12    3.43    0.73
   0   7 -12    2.38    0.59
   0  -7  12    2.18    0.66
   0  -7  12    3.43    0.86
   0   7 -12    3.17    0.92
   0   7 -12    1.72    0.73
   0  -7  11   20.74    1.19
   0  -7  11   19.68    1.32
   0   7 -11   19.15    1.19
   0   7 -11   18.16    1.25
   0  -7  11   20.80    1.25
   0  -7  11   21.46    1.32
   0   7 -11   22.92    1.25
   0   7 -11   20.47    1.39
   0  -7  10   42.47    2.11
   0  -7  10   39.43    1.85
   0   7 -10   42.00    1.92
   0   7 -10   44.18    2.11
   0   7 -10   43.26    1.78
   0  -7   9    0.13    0.53
   0  -7   9    0.40    0.53
   0   7  -9    0.26    0.53
   0   7  -9    0.73    0.53
   0   7  -9    0.66    0.79
   0  -7   8    1.72    0.59
   0  -7   8    1.98    0.66
   0   7  -8    2.71    0.66
   0   7  -8    1.32    0.53
   0  -7   8    0.86    0.66
   0  -7   8    1.92    0.59
   0   7  -8    2.31    0.79
   0   7  -8    2.51    0.59
   0  -7   7    1.45    0.66
   0  -7   7    2.18    0.73
   0   7  -7    3.10    0.66
   0   7  -7    1.78    0.59
   0  -7   7    3.04    0.66
   0  -7   7    3.04    0.73
   0   7  -7    2.77    0.73
   0   7  -7    3.50    0.66
   0  -7   6    3.76    0.79
   0  -7   6    3.37    0.66
   0  -7   6    5.15    0.86
   0  -7   6    4.69    0.73
   0   7  -6    4.09    0.79
   0   7  -6    4.23    0.66
   0  -7   5    5.28    0.86
   0  -7   5    5.81    0.79
   0  -7   5    4.56    0.86
   0  -7   5    6.01    0.73
   0   7  -5    5.35    0.79
   0   7  -5    6.87    0.73
   0  -7   4   67.76    2.97
   0  -7   4   66.18    2.97
   0  -7   4   65.25    2.25
   0  -7   4   69.54    2.25
   0   7  -4   68.29    2.25
   0   7  -4   67.50    2.31
   0  -7   3  148.99    6.01
   0  -7   3  152.30    6.08
   0   7  -3  149.79    6.08
   0   7  -3  142.92    5.75
   0  -7   3  152.56    4.36
   0  -7   3  144.31    4.03
   0   7  -3  147.21    4.23
   0   7  -3  154.94    4.36
   0  -7   2   73.51    3.17
   0  -7   2   70.27    3.10
   0   7  -2   70.27    3.10
   0   7  -2   70.40    3.04
   0  -7   2   71.19    2.31
   0  -7   2   71.26    2.38
   0   7  -2   73.18    2.44
   0   7  -2   72.45    2.38
   0  -7   1    3.90    0.73
   0  -7   1    3.24    0.79
   0   7  -1    4.95    0.86
   0   7  -1    4.62    0.79
   0  -7   1    4.56    0.86
   0  -7   1    4.42    0.73
   0   7  -1    3.30    0.73
   0   7  -1    4.16    0.79
   0  -7   0   44.71    2.11
   0  -7   0   45.04    2.18
   0   7   0   48.48    2.31
   0   7   0   46.43    2.18
   0   7   0   45.04    1.78
   0   7   0   45.11    1.72
   0  -7  -1    6.67    0.86
   0  -7  -1    6.60    0.86
   0   7   1    6.41    0.92
   0   7   1    5.28    0.79
   0  -7  -1    6.87    0.79
   0  -7  -1    6.21    0.86
   0   7   1    6.14    0.79
   0   7   1    4.62    0.86
   0  -7  -2   56.53    2.58
   0  -7  -2   52.90    2.44
   0   7   2   53.36    2.44
   0   7   2   54.68    2.58
   0  -7  -2   56.47    2.05
   0  -7  -2   58.45    2.05
   0   7   2   56.86    2.05
   0   7   2   52.90    1.92
   0  -7  -3   25.49    1.45
   0  -7  -3   28.27    1.59
   0   7   3   25.96    1.59
   0   7   3   27.28    1.52
   0  -7  -3   24.90    1.32
   0  -7  -3   26.09    1.25
   0   7   3   25.62    1.39
   0   7   3   23.25    1.25
   0  -7  -4   15.12    1.12
   0  -7  -4   15.32    1.12
   0   7   4   15.72    1.12
   0   7   4   14.73    1.19
   0  -7  -4   14.27    1.06
   0  -7  -4   15.39    1.06
   0   7   4   14.40    1.06
   0   7   4   15.19    1.12
   0  -7  -5   10.04    0.92
   0  -7  -5   10.37    0.92
   0   7   5   10.17    0.99
   0   7   5    9.91    0.99
   0   7   5   11.76    1.06
   0   7   5   10.96    0.92
   0  -7  -6   57.00    2.64
   0  -7  -6   53.30    2.44
   0   7   6   53.36    2.58
   0   7   6   57.66    2.64
   0  -7  -6   54.16    2.05
   0  -7  -6   52.70    2.05
   0   7   6   53.36    1.98
   0   7   6   51.91    2.05
   0  -7  -7   91.14    3.90
   0  -7  -7   89.49    3.76
   0   7   7   91.80    3.90
   0   7   7   86.91    3.83
   0  -7  -8    1.06    0.73
   0  -7  -8    0.53    0.66
   0   7   8    0.26    0.73
   0   7   8    1.19    0.66
   0  -7  -8    0.79    0.79
   0   7   8    0.53    0.73
   0  -7  -9    7.99    0.92
   0  -7  -9    6.87    0.86
   0   7   9    6.01    0.92
   0   7   9    6.80    0.86
   0  -7  -9    7.73    0.92
   0  -7  -9    7.99    0.99
   0   7   9    6.47    0.92
   0   7   9    6.74    0.92
   0   7  10   13.34    1.19
   0   7  10   10.30    1.06
   0  -7 -10   13.54    1.12
   0  -7 -10   13.27    1.12
   0   7  10   12.94    1.12
   0   7  10   12.15    1.12
   0  -7 -11   41.08    2.25
   0   7  11   41.54    2.31
   0  -7 -11   47.55    2.05
   0  -7 -11   48.28    2.05
   0   7  11   45.31    2.05
   0   7  11   46.10    2.11
   0  -7 -12   47.75    2.51
   0  -7 -12   57.39    2.31
   0  -7 -12   54.49    2.25
   0   7  12   52.97    2.25
   0   7  12   52.77    2.25
   0  -7 -13    2.44    0.79
   0  -7 -13    1.32    0.79
   0   7  13    0.46    0.86
   0   7  13    2.18    0.86
   0  -7 -14    9.38    1.12
   0  -7 -14    9.91    1.06
   0   7  14    8.12    1.12
   0   7  14    8.65    1.06
   0  -7 -15   18.03    1.39
   0  -7 -15   17.37    1.45
   0   7  15   16.71    1.32
   0   7  15   17.11    1.45
   0  -7 -16   47.16    2.18
   0  -7 -16   47.68    2.31
   0   7  16   45.50    2.18
   0   7  16   48.15    2.31
   0   7  17    4.69    0.99
   0  -7 -17    4.29    0.99
   0  -7 -17    4.95    1.06
   0   7  17    3.96    0.99
   0   7  17    6.08    1.19
   0   7  18    2.84    0.92
   0   7  18    3.63    1.19
   0  -7 -18    5.94    1.06
   0  -7 -18    4.29    1.06
   0   7  18    4.69    1.06
   0   7  18    3.24    1.06
   0   7  19   29.92    2.44
   0   7  19   28.27    2.25
   0   7  19   28.99    1.92
   0   7  19   24.50    2.11
   0  -7 -20   -0.07    0.33
   0  -7 -20   -0.33    0.79
   0  -7 -20   -2.11    1.06
   0   7  20    0.00    1.06
   0   7  20   -0.59    0.92
   0  -7 -21   25.49    1.72
   0  -7 -21   27.61    1.98
   0   7  21   24.96    1.78
   0   7  21   23.84    1.92
   0  -7 -22    0.13    0.73
   0  -7 -22    0.53    0.92
   0  -7 -22   -1.25    0.79
   0   7  22   -2.58    0.99
   0   7  22    0.00    0.86
   0   7  23   -0.33    0.73
   0  -7 -23    0.99    0.92
   0  -7 -23   -0.26    0.99
   0   7  23   -0.79    1.06
   0   7  23    1.52    0.92
   0  -7 -24    0.73    0.92
   0  -7 -24    0.59    0.99
   0   7  24    1.65    1.12
   0  -8  20   -1.52    0.92
   0  -8  20   -0.33    0.79
   0   8 -20   -2.05    0.99
   0  -8  19    1.59    0.99
   0  -8  19    0.00    0.86
   0   8 -19    0.86    1.12
   0   8 -19    0.73    1.06
   0  -8  18   10.30    1.25
   0  -8  18    7.73    1.06
   0   8 -18   12.55    1.39
   0   8 -18    9.58    1.32
   0  -8  17    0.79    0.92
   0  -8  17    0.73    0.79
   0   8 -17    0.79    0.99
   0   8 -17    1.06    1.06
   0  -8  16    0.79    0.92
   0  -8  16    0.92    0.79
   0   8 -16    0.86    0.99
   0   8 -16    1.92    0.92
   0  -8  15   31.30    1.72
   0  -8  15   31.63    1.72
   0   8 -15   33.35    1.98
   0   8 -15   31.57    1.72
   0   8 -14   42.99    2.11
   0   8 -14   39.43    1.92
   0  -8  14   44.12    1.92
   0  -8  14   44.78    2.05
   0   8 -14   45.04    1.98
   0   8 -14   46.56    2.25
   0  -8  13   15.12    1.06
   0  -8  13   14.40    1.12
   0   8 -13   14.99    1.12
   0   8 -13   16.25    1.12
   0  -8  13   14.53    1.12
   0  -8  13   16.05    1.25
   0   8 -13   16.25    1.19
   0   8 -13   13.41    1.25
   0  -8  12   37.84    2.05
   0  -8  12   37.25    1.85
   0   8 -12   39.76    1.98
   0   8 -12   42.53    2.18
   0  -8  12   46.30    2.05
   0  -8  12   41.01    1.78
   0   8 -12   42.27    1.78
   0   8 -12   43.26    2.05
   0  -8  11  104.02    4.29
   0  -8  11  107.78    4.56
   0   8 -11  103.82    4.42
   0   8 -11  111.22    4.56
   0  -8  11  101.97    3.30
   0  -8  11  103.36    3.24
   0   8 -11  102.17    3.37
   0   8 -11  105.34    3.30
   0  -8  10   15.59    1.19
   0  -8  10   16.18    1.12
   0   8 -10   14.20    1.19
   0   8 -10   16.25    1.12
   0   8 -10   17.50    1.19
   0   8 -10   15.26    1.19
   0  -8   9    0.40    0.53
   0  -8   9    0.40    0.66
   0   8  -9    0.46    0.59
   0   8  -9    0.07    0.59
   0  -8   9    0.86    0.66
   0   8  -9    1.45    0.66
   0   8  -9    0.46    0.73
   0  -8   8    2.18    0.59
   0  -8   8    2.84    0.79
   0   8  -8    1.25    0.59
   0   8  -8    0.92    0.66
   0   8  -8    2.44    0.73
   0  -8   7  120.93    5.15
   0  -8   6    0.73    0.66
   0  -8   6    1.19    0.73
   0   8  -6    0.26    0.46
   0   8  -6    1.25    0.66
   0  -8   6    0.59    0.73
   0  -8   6    1.25    0.59
   0   8  -6    0.86    0.73
   0  -8   5  423.47   16.31
   0  -8   5  428.16   16.51
   0  -8   5  418.72   10.96
   0  -8   5  412.97   10.70
   0   8  -5  432.32   11.29
   0   8  -5  423.93   11.03
   0  -8   4   71.00    3.10
   0  -8   4   67.89    3.10
   0  -8   4   69.21    2.44
   0  -8   4   69.02    2.31
   0   8  -4   70.86    2.38
   0   8  -4   75.49    2.58
   0  -8   3    3.90    0.86
   0  -8   3    6.93    0.86
   0   8  -3    6.34    0.79
   0   8  -3    5.61    0.79
   0  -8   3    5.88    0.92
   0  -8   3    6.21    0.79
   0   8  -3    5.28    0.86
   0   8  -3    6.54    0.79
   0  -8   2   15.12    1.19
   0  -8   2   13.67    1.19
   0   8  -2   14.73    1.25
   0   8  -2   15.59    1.12
   0  -8   2   12.22    1.06
   0  -8   2   13.14    0.99
   0   8  -2   12.15    1.06
   0   8  -2   11.56    0.99
   0  -8   1  544.93   20.87
   0  -8   1  571.48   21.86
   0   8  -1  529.54   20.28
   0   8  -1  584.35   22.39
   0  -8   1  590.96   15.12
   0  -8   1  565.80   14.53
   0   8  -1  584.82   14.99
   0   8  -1  590.03   15.19
   0  -8   0  211.80    8.39
   0  -8   0  210.15    8.32
   0   8   0  208.43    8.32
   0   8   0  205.86    8.12
   0  -8   0  206.45    5.68
   0  -8   0  198.20    5.55
   0   8   0  201.70    5.68
   0   8   0  195.22    5.42
   0  -8  -1   30.64    1.65
   0  -8  -1   29.79    1.72
   0   8   1   30.58    1.78
   0   8   1   30.31    1.65
   0  -8  -1   28.00    1.39
   0  -8  -1   28.33    1.45
   0   8   1   28.66    1.45
   0   8   1   29.52    1.45
   0  -8  -2  411.91   15.92
   0  -8  -2  392.36   15.12
   0   8   2  402.01   15.52
   0   8   2  407.36   15.78
   0  -8  -2  403.00   10.50
   0  -8  -2  399.43   10.50
   0   8   2  393.36   10.30
   0   8   2  397.85   10.43
   0  -8  -3    1.06    0.73
   0  -8  -3    1.06    0.66
   0   8   3    1.52    0.73
   0   8   3    2.71    0.79
   0  -8  -3    1.65    0.66
   0  -8  -3    1.85    0.79
   0   8   3    1.85    0.73
   0   8   3    2.31    0.79
   0  -8  -4  110.76    4.62
   0   8   4  108.25    4.62
   0  -8  -4  106.79    3.30
   0   8   4  109.50    3.43
   0  -8  -6   22.39    1.39
   0   8   6   21.40    1.32
   0  -8  -7   24.50    1.39
   0  -8  -7   25.29    1.45
   0   8   7   23.97    1.45
   0   8   7   23.91    1.32
   0  -8  -8   61.62    2.84
   0   8   8   60.50    2.91
   0  -8  -8   61.75    2.38
   0  -8  -8   65.32    2.38
   0   8   8   63.40    2.44
   0   8   8   65.78    2.44
   0  -8  -9   -0.13    0.66
   0   8   9   -0.99    0.73
   0   8   9   -0.40    0.86
   0  -8  -9   -0.66    0.73
   0  -8  -9   -0.73    0.66
   0   8   9    1.06    0.79
   0   8   9   -1.32    0.73
   0  -8 -10   66.57    3.04
   0  -8 -10   64.66    3.04
   0   8  10   68.88    3.10
   0   8  10   65.71    3.17
   0  -8 -10   62.48    2.44
   0  -8 -10   65.45    2.44
   0   8  10   56.67    2.38
   0   8  10   61.22    2.44
   0   8  11   40.15    2.11
   0   8  11   35.93    2.11
   0  -8 -11   37.64    1.85
   0  -8 -11   37.71    1.85
   0   8  11   34.34    1.85
   0   8  11   34.54    1.78
   0  -8 -12    0.86    0.79
   0  -8 -12    0.20    0.46
   0   8  12    1.25    0.73
   0   8  12    0.59    0.86
   0  -8 -12    0.33    0.79
   0  -8 -12    0.86    0.79
   0   8  12    1.12    0.86
   0   8  12    0.46    0.79
   0  -8 -13    0.79    0.73
   0  -8 -13   -0.40    0.46
   0   8  13   -0.66    0.73
   0  -8 -13    0.99    0.79
   0  -8 -13    0.73    0.79
   0   8  13    1.98    0.92
   0   8  13    1.45    0.79
   0  -8 -14    3.76    0.92
   0  -8 -14    4.42    0.92
   0   8  14    2.91    0.92
   0   8  14    5.55    1.06
   0   8  15   17.30    1.52
   0   8  15   13.60    1.25
   0  -8 -15   15.19    1.39
   0  -8 -15   14.66    1.25
   0   8  15   16.31    1.32
   0   8  15   16.78    1.45
   0   8  16   10.30    1.32
   0   8  16   11.03    1.12
   0  -8 -16   12.15    1.19
   0  -8 -16    9.77    1.19
   0   8  16    9.71    1.19
   0   8  16    8.92    1.25
   0   8  17   27.01    1.98
   0   8  17   24.50    1.65
   0  -8 -17   22.32    1.65
   0   8  17   25.49    1.65
   0   8  17   25.43    1.72
   0   8  18   28.66    2.11
   0   8  18   27.87    1.85
   0  -8 -18   29.46    1.85
   0  -8 -18   30.05    1.85
   0   8  18   30.78    1.85
   0   8  18   32.30    1.98
   0   8  19    5.94    1.12
   0   8  19    8.32    1.25
   0  -8 -19    7.93    1.19
   0  -8 -20   -0.26    0.33
   0  -8 -20   -1.25    0.79
   0   8  20    1.39    0.99
   0   8  20   -0.79    0.99
   0  -8 -20    1.12    0.92
   0  -8 -20   -1.45    0.79
   0   8  20    1.25    0.92
   0   8  20    1.12    1.06
   0  -8 -21    0.53    0.86
   0  -8 -21   -0.13    0.33
   0   8  21   -0.79    0.99
   0   8  21   -0.99    1.06
   0  -8 -21   -0.13    0.86
   0  -8 -21   -0.20    1.06
   0   8  21    0.13    1.06
   0   8  21    1.06    0.92
   0   8  22    4.29    1.06
   0   8  22    2.38    1.32
   0  -8 -22    3.90    1.06
   0  -8 -22    4.09    1.12
   0   8  22    2.18    1.12
   0   8  22    2.05    0.99
   0   8  23    0.73    0.79
   0   8  23    0.73    0.99
   0  -8 -23    1.32    0.92
   0  -8 -23    1.39    0.99
   0   8  23    0.26    0.92
   0   8  23    0.00    1.06
   0  -8 -24    0.53    0.92
   0  -8 -24    1.85    0.99
   0   8  24    0.53    1.12
   0   8  24    1.32    0.99
   0  -9  19    1.72    0.86
   0  -9  19    1.72    1.06
   0   9 -19    2.38    0.99
   0   9 -19    0.59    1.06
   0  -9  18   21.99    1.59
   0  -9  18   23.18    1.65
   0   9 -18   20.54    1.72
   0   9 -18   26.29    1.78
   0  -9  17    3.76    0.92
   0  -9  17    5.55    1.06
   0   9 -17    5.22    1.12
   0   9 -17    5.55    1.12
   0  -9  16   18.82    1.39
   0  -9  16   21.60    1.59
   0   9 -16   21.07    1.65
   0   9 -16   19.68    1.45
   0  -9  15   10.24    0.99
   0  -9  15   11.36    0.86
   0   9 -15   12.42    1.06
   0   9 -15   10.37    0.86
   0  -9  15   11.43    1.12
   0  -9  15   12.35    1.25
   0   9 -15   15.26    1.25
   0   9 -15   12.75    1.32
   0  -9  14    5.55    0.73
   0  -9  14    6.08    0.92
   0   9 -14    5.81    0.79
   0   9 -14    6.60    0.86
   0  -9  14    4.56    0.92
   0  -9  14    5.02    0.92
   0   9 -14    7.33    1.12
   0   9 -14    4.56    0.92
   0  -9  13   20.47    1.52
   0  -9  13   20.47    1.32
   0   9 -13   19.02    1.45
   0   9 -13   20.08    1.39
   0  -9  13   22.06    1.45
   0  -9  13   20.67    1.32
   0   9 -13   23.25    1.39
   0   9 -13   22.45    1.59
   0  -9  12   51.78    2.71
   0  -9  12   48.41    2.38
   0   9 -12   46.89    2.44
   0   9 -12   44.05    2.25
   0  -9  12   48.74    1.98
   0  -9  12   52.50    2.18
   0  -9  11   51.84    2.64
   0  -9  11   56.07    2.64
   0   9 -11   52.70    2.51
   0   9 -11   53.69    2.71
   0  -9  11   50.52    2.05
   0  -9  11   56.93    2.31
   0   9 -11   49.07    2.18
   0   9 -11   55.34    2.18
   0  -9  10   78.26    3.57
   0  -9  10   80.90    3.50
   0   9 -10   81.96    3.70
   0   9 -10   92.66    3.96
   0  -9  10   79.58    2.84
   0  -9  10   79.65    2.71
   0   9 -10   76.68    2.64
   0   9 -10   73.51    2.71
   0  -9   9   17.37    1.32
   0  -9   9   16.91    1.19
   0   9  -9   21.27    1.25
   0   9  -9   19.95    1.39
   0  -9   8   91.67    4.09
   0  -9   8   86.72    3.76
   0  -9   8   95.63    3.04
   0  -9   8   92.53    3.17
   0   9  -8   96.36    3.24
   0   9  -8   98.21    3.10
   0  -9   7  498.50   13.08
   0  -9   7  498.10   12.88
   0   9  -7  497.77   12.94
   0   9  -7  508.01   13.27
   0  -9   6   10.43    1.06
   0  -9   6   11.29    1.12
   0  -9   6   12.09    0.99
   0  -9   6   11.56    1.06
   0   9  -6    9.18    1.06
   0   9  -6    9.38    1.19
   0  -9   5   20.87    1.52
   0  -9   5   20.21    1.39
   0   9  -4   -0.53    0.53
   0  -9   0  125.75    5.35
   0   9   0  114.52    4.82
   0  -9  -1  504.84   19.42
   0   9   1  478.42   18.36
   0  -9  -2    2.97    0.86
   0  -9  -2    3.83    0.79
   0   9   2    5.15    0.99
   0   9   2    3.70    0.79
   0  -9  -3  147.87    6.08
   0  -9  -3  156.06    6.34
   0   9   3  136.25    5.68
   0   9   3  143.05    5.88
   0  -9  -3  149.39    4.42
   0   9   3  143.45    4.29
   0  -9  -4    1.72    0.73
   0  -9  -4    1.98    0.73
   0   9   4    2.64    0.79
   0   9   4    2.58    0.73
   0  -9  -4    1.65    0.79
   0  -9  -4    3.76    0.73
   0   9   4    3.76    0.79
   0   9   4    4.29    0.86
   0  -9  -5   26.15    1.59
   0  -9  -5   29.13    1.72
   0   9   5   27.61    1.72
   0   9   5   29.65    1.72
   0  -9  -5   26.35    1.39
   0  -9  -5   29.98    1.52
   0   9   5   29.98    1.52
   0   9   5   27.14    1.52
   0  -9  -6   97.41    4.16
   0  -9  -6   95.63    4.09
   0   9   6  102.10    4.29
   0   9   6   99.00    4.29
   0  -9  -6  100.32    3.24
   0  -9  -6  101.31    3.30
   0   9   6   99.00    3.30
   0   9   6   98.54    3.24
   0  -9  -7  179.77    7.26
   0  -9  -7  167.75    6.80
   0   9   7  177.33    7.26
   0   9   7  178.85    7.20
   0  -9  -7  169.47    5.02
   0  -9  -7  176.67    5.15
   0  -9  -8  192.91    7.79
   0  -9  -8  186.44    7.46
   0   9   8  196.02    7.86
   0   9   8  205.00    8.32
   0  -9  -8  198.00    5.68
   0  -9  -8  196.28    5.68
   0   9   8  193.57    5.55
   0   9   8  198.53    5.75
   0  -9  -9   21.66    1.45
   0  -9  -9   19.48    1.39
   0   9   9   20.80    1.45
   0   9   9   18.89    1.52
   0  -9  -9   19.02    1.32
   0  -9  -9   21.20    1.39
   0   9   9   18.03    1.39
   0   9   9   20.08    1.39
   0  -9 -10  186.24    7.53
   0  -9 -10  190.47    7.73
   0   9  10  197.01    7.93
   0   9  10  193.97    7.93
   0  -9 -10  197.87    5.81
   0  -9 -10  189.02    5.48
   0   9  10  198.39    5.75
   0   9  10  192.72    5.68
   0  -9 -11    0.99    0.79
   0  -9 -11    2.77    0.79
   0   9  11    1.85    0.92
   0   9  11    1.32    0.79
   0  -9 -11    0.46    0.79
   0  -9 -11    1.78    0.86
   0   9  11    0.33    0.79
   0   9  11    0.07    0.86
   0  -9 -12    0.73    0.59
   0  -9 -12   -0.99    0.73
   0   9  12   -0.20    0.86
   0   9  12    0.99    0.73
   0  -9 -12    0.79    0.86
   0  -9 -12   -1.06    0.79
   0   9  12    1.19    0.86
   0   9  12   -0.33    0.73
   0   9  13   11.10    1.39
   0  -9 -13   17.44    1.39
   0  -9 -13   17.90    1.39
   0   9  13   14.40    1.25
   0   9  13   17.50    1.45
   0   9  14    6.21    0.92
   0   9  14    6.93    1.12
   0  -9 -14    6.34    1.06
   0  -9 -14    5.28    0.99
   0   9  14    4.82    0.99
   0   9  14    4.23    1.06
   0   9  15   47.16    2.64
   0   9  15   42.80    2.31
   0  -9 -15   42.86    2.11
   0  -9 -15   42.20    2.05
   0   9  15   42.99    2.18
   0   9  15   46.56    2.18
   0  -9 -16    1.78    0.86
   0  -9 -16    0.20    0.46
   0   9  16   -0.46    0.92
   0   9  16    2.44    0.86
   0  -9 -16    1.25    0.86
   0  -9 -16    0.40    0.92
   0   9  16    2.31    0.86
   0   9  16    2.18    0.99
   0   9  17   13.01    1.32
   0   9  17   12.02    1.45
   0  -9 -17   12.42    1.32
   0  -9 -17   11.89    1.25
   0   9  17   13.21    1.32
   0   9  17   15.06    1.45
   0   9  18   22.12    1.85
   0   9  18   24.44    1.78
   0  -9 -18   19.15    1.59
   0   9  18   15.45    1.78
   0   9  19    4.36    1.06
   0   9  19    3.43    1.12
   0  -9 -19    2.38    1.06
   0  -9 -19    3.10    0.92
   0   9  19    1.65    0.99
   0   9  19    1.32    0.92
   0   9  20    6.01    1.25
   0   9  20    7.13    1.25
   0  -9 -20    6.14    1.06
   0  -9 -20    5.75    1.19
   0   9  20    6.93    1.12
   0   9  20    5.22    1.19
   0   9  21    3.50    1.12
   0   9  21    3.17    1.25
   0  -9 -21    2.84    1.06
   0  -9 -21    2.71    0.92
   0   9  21    2.51    0.92
   0   9  21    4.36    1.12
   0  -9 -22   -0.13    0.86
   0  -9 -22   -0.20    0.33
   0   9  22   -0.53    1.19
   0   9  22   -1.39    0.99
   0  -9 -22    0.40    0.99
   0  -9 -22    0.40    0.92
   0   9  22   -0.46    1.06
   0   9  22    0.86    0.86
   0   9  23    0.99    1.12
   0   9  23   -0.86    0.92
   0  -9 -23    0.99    0.99
   0  -9 -23   -0.66    0.92
   0   9  23   -0.59    0.99
   0   9  23   -0.66    1.06
   0  10 -19   -0.59    0.99
   0 -10  18    4.09    1.19
   0 -10  18    1.98    0.86
   0  10 -18    2.77    0.99
   0  10 -18    3.37    1.19
   0 -10  17    3.76    0.99
   0 -10  17    4.16    1.06
   0  10 -17    3.83    1.06
   0  10 -17    3.50    1.12
   0 -10  16    6.41    0.92
   0  10 -16    5.94    0.79
   0  10 -16    5.61    0.66
   0 -10  16    4.76    0.99
   0 -10  16    5.55    1.12
   0  10 -16    6.08    1.12
   0  10 -16    7.07    1.19
   0 -10  15   19.42    1.32
   0 -10  15   20.61    1.52
   0  10 -15   20.34    1.32
   0  10 -15   19.75    1.45
   0 -10  15   26.09    1.65
   0 -10  15   22.65    1.52
   0 -10  14    4.49    0.99
   0 -10  14    3.96    0.73
   0  10 -14    1.92    0.73
   0  10 -14    3.37    0.86
   0 -10  14    3.24    0.86
   0 -10  14    3.76    0.99
   0  10 -14    5.81    0.99
   0  10 -14    5.02    1.06
   0 -10  13    7.66    0.92
   0 -10  13    6.60    1.06
   0  10 -13    8.52    1.06
   0  10 -13    8.06    1.12
   0 -10  13    8.92    0.99
   0 -10  13    8.98    1.06
   0  10 -13    7.20    1.12
   0  10 -13    8.59    0.99
   0 -10  12    0.33    0.66
   0 -10  12    0.07    0.79
   0  10 -12    0.20    0.66
   0  10 -12    0.20    0.79
   0 -10  12    1.19    0.86
   0 -10  12    0.20    0.73
   0  10 -12    0.73    0.73
   0  10 -12   -0.26    0.86
   0  10 -11   28.13    1.92
   0  10 -11   30.58    1.59
   0  10 -11   26.22    1.65
   0 -10  10    3.04    0.79
   0 -10  10    1.25    0.79
   0  10 -10    2.84    0.92
   0  10 -10    2.11    0.73
   0  10  -9   73.11    3.43
   0 -10   9   84.47    2.97
   0 -10   9   84.14    2.84
   0  10  -9   84.73    2.84
   0  10  -9   86.58    3.10
   0 -10   8   67.96    3.37
   0 -10   8   74.63    3.37
   0  10  -8   80.90    3.57
   0 -10   8   78.92    2.71
   0 -10   8   78.00    2.84
   0  10  -8   82.42    2.84
   0  10  -8   79.71    2.91
   0 -10   7   73.90    2.58
   0 -10   7   74.17    2.77
   0  10  -7   76.35    2.77
   0  10  -7   71.06    2.58
   0 -10   6  101.64    3.37
   0 -10   6  104.28    3.24
   0  10  -6  101.38    3.37
   0  10  -6  102.63    3.30
   0 -10   5   19.22    1.52
   0 -10   5   18.10    1.32
   0 -10   5   17.44    1.19
   0 -10   5   18.16    1.32
   0  10  -5   16.05    1.39
   0 -10   4  318.26   12.55
   0 -10   4  306.11   11.95
   0 -10   4  283.92    7.66
   0 -10   4  276.92    7.60
   0 -10   3    2.51    0.73
   0 -10   3    1.92    0.86
   0 -10   3    2.71    0.73
   0 -10   3    1.72    0.79
   0  10  -3    3.37    0.86
   0  10  -3    2.64    0.79
   0 -10   2   15.59    1.32
   0 -10   2   17.50    1.32
   0  10  -2   15.26    1.32
   0  10  -2   14.93    1.19
   0 -10   2   16.38    1.19
   0 -10   2   15.45    1.12
   0  10  -2   14.40    1.12
   0  10  -2   16.84    1.25
   0 -10   1    3.24    0.79
   0 -10   1    4.09    0.86
   0  10  -1    5.15    0.92
   0  10  -1    4.69    0.79
   0 -10   1    5.75    0.86
   0 -10   1    5.88    0.86
   0  10  -1    5.09    0.92
   0  10  -1    3.76    0.79
   0 -10   0  144.24    5.94
   0 -10   0  149.65    6.21
   0  10   0  141.14    5.81
   0  10   0  141.60    5.94
   0 -10   0  154.01    4.56
   0 -10   0  146.95    4.29
   0  10   0  150.38    4.49
   0  10   0  149.98    4.42
   0 -10  -1   28.40    1.72
   0 -10  -1   28.13    1.72
   0  10   1   28.66    1.72
   0  10   1   27.21    1.78
   0 -10  -1   30.25    1.52
   0 -10  -1   29.52    1.59
   0  10   1   27.87    1.59
   0  10   1   27.67    1.52
   0 -10  -2  739.69   28.27
   0 -10  -2  731.10   28.00
   0  10   2  756.20   28.86
   0  10   2  740.35   28.33
   0 -10  -2  739.03   18.89
   0 -10  -2  735.07   18.82
   0  10   2  739.69   18.95
   0  10   2  751.58   19.28
   0 -10  -3   13.27    1.19
   0 -10  -3   12.42    1.19
   0  10   3   10.70    1.19
   0  10   3   14.33    1.25
   0 -10  -3   10.77    1.12
   0 -10  -3   13.74    1.12
   0  10   3   11.36    1.19
   0  10   3    9.97    1.06
   0 -10  -4    6.41    0.92
   0 -10  -4    5.48    0.92
   0  10   4    4.23    0.92
   0  10   4    7.20    0.99
   0 -10  -4    3.37    0.79
   0 -10  -4    5.75    0.92
   0  10   4    4.23    0.86
   0  10   4    4.16    0.92
   0 -10  -5  335.44   13.14
   0 -10  -5  345.01   13.47
   0  10   5  362.18   14.07
   0  10   5  347.98   13.67
   0 -10  -5  361.72    9.71
   0 -10  -5  368.59    9.84
   0  10   5  359.81    9.71
   0  10   5  361.52    9.71
   0 -10  -6    3.43    0.79
   0 -10  -6    3.70    0.79
   0  10   6    4.03    0.92
   0  10   6    3.37    0.79
   0 -10  -6    2.71    0.86
   0 -10  -6    3.70    0.86
   0  10   6    3.57    0.92
   0  10   6    2.18    0.79
   0 -10  -7  279.30   11.03
   0 -10  -7  289.60   11.36
   0  10   7  291.45   11.43
   0  10   7  290.66   11.56
   0 -10  -7  288.15    7.86
   0 -10  -7  292.51    8.06
   0  10   7  304.06    8.39
   0  10   7  302.61    8.32
   0 -10  -8   58.58    2.84
   0 -10  -8   64.00    2.97
   0  10   8   64.00    3.17
   0  10   8   64.46    2.97
   0 -10  -8   67.30    2.51
   0 -10  -8   63.40    2.51
   0  10   8   61.62    2.44
   0  10   8   67.10    2.64
   0 -10  -9    3.76    0.86
   0 -10  -9    4.56    0.86
   0  10   9    4.49    0.99
   0  10   9    5.28    0.92
   0 -10  -9    4.76    0.92
   0 -10  -9    4.82    0.92
   0  10   9    3.04    0.99
   0  10   9    4.42    0.92
   0 -10 -10   52.83    2.64
   0 -10 -10   49.07    2.51
   0  10  10   48.67    2.51
   0  10  10   52.17    2.77
   0 -10 -10   53.10    2.18
   0 -10 -10   58.91    2.44
   0  10  10   51.51    2.25
   0  10  10   47.16    2.18
   0 -10 -11  176.86    7.26
   0 -10 -11  176.80    7.26
   0  10  11  182.02    7.53
   0  10  11  166.30    6.80
   0 -10 -11  172.77    5.22
   0 -10 -11  167.82    5.02
   0  10  11  168.61    5.15
   0  10  11  179.18    5.35
   0 -10 -12    6.87    1.06
   0 -10 -12    5.88    0.99
   0  10  12    6.87    0.99
   0  10  12    5.81    1.06
   0 -10 -12    6.60    0.99
   0 -10 -12    5.48    0.99
   0  10  12    3.43    0.99
   0  10  12    4.36    0.99
   0  10  13  170.46    7.07
   0  10  13  184.99    7.73
   0 -10 -13  176.80    5.35
   0 -10 -13  175.08    5.28
   0  10  13  181.29    5.55
   0  10  13  176.73    5.35
   0 -10 -14    0.99    0.86
   0 -10 -14   -0.26    0.53
   0  10  14    1.32    0.92
   0  10  14    1.45    0.79
   0 -10 -14    1.78    0.86
   0 -10 -14    1.85    0.86
   0  10  14    1.39    0.86
   0  10  14    0.73    0.92
   0  10  15    7.20    1.06
   0  10  15    7.07    1.19
   0 -10 -15    6.34    1.06
   0 -10 -15    7.40    1.06
   0  10  15    7.86    1.12
   0  10  15    6.34    1.12
   0 -10 -16   -0.07    0.53
   0 -10 -16   -0.20    0.86
   0  10  16    2.91    0.99
   0  10  16    0.79    0.86
   0 -10 -16   -0.59    0.86
   0 -10 -16    0.20    0.86
   0  10  16    0.59    0.92
   0  10  16   -0.59    0.92
   0 -10 -17    2.84    0.86
   0 -10 -17    0.20    0.46
   0  10  17    1.39    0.86
   0  10  17    0.40    0.99
   0 -10 -17    2.05    0.92
   0  10  17   -0.46    0.86
   0  10  18    4.03    1.06
   0  10  18    2.44    1.12
   0 -10 -18    2.31    1.12
   0  10  18    2.31    0.99
   0  10  18    2.77    1.06
   0  10  19   17.37    1.65
   0  10  19   13.94    1.59
   0 -10 -19   15.45    1.52
   0 -10 -19   13.94    1.32
   0  10  19   12.09    1.32
   0  10  19   16.44    1.52
   0 -10 -20   -0.33    0.92
   0 -10 -20    0.07    0.46
   0  10  20    0.92    1.12
   0  10  20    0.00    0.92
   0 -10 -20    1.25    0.92
   0 -10 -20   -0.13    0.86
   0  10  20   -0.53    0.92
   0  10  21    3.76    1.32
   0  10  21    3.83    1.19
   0 -10 -21    4.23    1.06
   0 -10 -21    5.22    1.06
   0  10  21    4.03    1.06
   0  10  21    3.76    1.19
   0  10  22    2.44    1.19
   0  10  22    4.42    1.39
   0 -10 -22    4.56    1.06
   0 -10 -22    4.95    1.19
   0  10  22    3.96    1.25
   0  10  22    4.03    1.06
   0  10  23    1.59    1.06
   0  10  23    0.26    1.12
   0 -10 -23    0.66    0.99
   0 -10 -23    1.59    0.99
   0  10  23   -0.26    0.99
   0  10  23    0.73    1.06
   0 -11  18    1.98    1.06
   0 -11  18    1.19    0.92
   0  11 -18    0.20    0.92
   0 -11  17   -0.13    0.79
   0 -11  17   -0.13    0.92
   0  11 -17   -0.46    0.92
   0 -11  16    4.95    0.99
   0 -11  16    4.16    1.06
   0  11 -16    3.30    1.12
   0  11 -16    3.57    0.99
   0 -11  15    0.79    0.92
   0 -11  15    3.50    0.86
   0  11 -15    1.92    0.86
   0  11 -15    3.96    0.92
   0 -11  15    2.77    1.06
   0 -11  15    3.17    0.92
   0  11 -15    2.44    0.99
   0  11 -15    2.71    1.12
   0 -11  14    4.82    0.92
   0  11 -14    2.71    0.92
   0 -11  14    3.70    0.92
   0 -11  14    4.16    0.99
   0  11 -14    4.36    0.99
   0  11 -14    3.96    1.06
   0  11 -13    1.65    0.86
   0 -11  13    1.72    0.92
   0 -11  13    2.51    0.86
   0 -11  12   11.23    1.19
   0 -11  12   13.08    1.39
   0  11 -12   12.02    1.39
   0  11 -12   11.10    1.19
   0 -11  12   14.27    1.19
   0 -11  12   15.06    1.32
   0  11 -12   13.87    1.19
   0  11 -12   10.77    1.25
   0 -11  11    4.09    0.99
   0 -11  11    4.62    0.86
   0  11 -11    2.97    0.86
   0  11 -11    1.45    0.86
   0 -11  11    3.50    0.92
   0 -11  11    4.09    0.86
   0  11 -11    3.30    0.86
   0  11 -11    4.56    1.06
   0 -11  10   20.08    1.65
   0 -11  10   19.81    1.45
   0 -11  10   22.92    1.39
   0 -11  10   22.65    1.45
   0  11 -10   21.60    1.52
   0  11 -10   22.26    1.32
   0 -11   9  131.23    5.48
   0 -11   9  136.58    5.88
   0 -11   9  141.66    4.42
   0 -11   9  137.90    4.23
   0  11  -9  147.28    4.62
   0  11  -9  140.67    4.29
   0 -11   8   42.53    2.25
   0 -11   8   37.84    2.25
   0 -11   8   43.99    1.92
   0 -11   8   44.45    2.05
   0  11  -8   45.70    2.11
   0  11  -8   40.88    1.92
   0 -11   7   18.62    1.59
   0 -11   7   16.31    1.25
   0 -11   7   20.41    1.25
   0 -11   7   17.04    1.32
   0  11  -7   17.70    1.39
   0  11  -7   17.11    1.25
   0 -11   6    4.49    0.86
   0 -11   6    5.22    1.06
   0 -11   6    5.48    0.86
   0 -11   6    4.89    0.92
   0  11  -6    6.54    0.99
   0  11  -6    5.42    0.86
   0 -11   5    0.40    0.86
   0 -11   5    1.78    0.79
   0  11  -5    2.05    0.79
   0  11  -5    0.26    0.46
   0 -11   5    0.92    0.73
   0 -11   5    2.58    0.79
   0  11  -5    2.31    0.86
   0  11  -5    0.73    0.73
   0 -11   4   19.81    1.52
   0 -11   4   19.81    1.39
   0 -11   4   18.23    1.19
   0 -11   4   20.80    1.39
   0 -11   3  269.59   10.77
   0 -11   3  274.48   10.83
   0 -11   3  282.27    7.79
   0 -11   3  268.00    7.33
   0  11  -3  276.85    7.60
   0  11  -3  280.16    7.79
   0 -11   2    7.86    1.06
   0 -11   2    7.93    0.99
   0  11  -2    6.14    0.92
   0  11  -2    3.90    0.86
   0 -11   2    7.86    0.99
   0 -11   2    8.19    0.92
   0  11  -2    7.46    0.92
   0  11  -2    9.11    1.12
   0 -11   1   89.56    4.03
   0 -11   1   95.70    4.16
   0  11  -1   96.36    4.16
   0  11  -1   96.29    4.36
   0 -11   1   95.90    3.24
   0 -11   1   87.64    2.97
   0  11  -1   89.36    3.04
   0  11  -1   91.60    3.17
   0 -11   0   77.87    3.50
   0 -11   0   77.93    3.57
   0  11   0   80.97    3.76
   0  11   0   77.73    3.50
   0 -11   0   80.44    2.91
   0 -11   0   77.14    2.71
   0  11   0   80.71    2.84
   0  11   0   76.41    2.84
   0 -11  -1    6.27    0.99
   0 -11  -1    7.00    0.92
   0  11   1    7.73    1.12
   0  11   1    7.00    0.99
   0 -11  -1    6.08    0.99
   0 -11  -1    5.75    0.86
   0  11   1    5.61    0.99
   0  11   1    6.87    0.99
   0 -11  -2   20.94    1.45
   0 -11  -2   18.76    1.45
   0  11   2   17.70    1.52
   0  11   2   19.61    1.45
   0 -11  -2   17.44    1.32
   0 -11  -2   17.90    1.25
   0  11   2   15.78    1.25
   0  11   2   18.56    1.39
   0 -11  -3  127.73    5.35
   0 -11  -3  121.45    5.15
   0  11   3  115.97    4.89
   0  11   3  118.68    5.15
   0 -11  -3  120.00    3.83
   0 -11  -3  122.31    3.76
   0  11   3  120.53    3.90
   0  11   3  127.40    3.96
   0 -11  -4   21.07    1.52
   0 -11  -4   22.65    1.52
   0  11   4   23.91    1.59
   0  11   4   22.59    1.72
   0 -11  -4   21.60    1.45
   0 -11  -4   21.13    1.32
   0  11   4   20.54    1.39
   0  11   4   18.43    1.39
   0 -11  -5   51.58    2.58
   0 -11  -5   56.34    2.71
   0  11   5   49.60    2.64
   0  11   5   54.35    2.64
   0 -11  -5   54.55    2.31
   0 -11  -5   54.68    2.18
   0  11   5   51.12    2.25
   0  11   5   54.75    2.25
   0 -11  -6   16.78    1.32
   0 -11  -6   19.55    1.45
   0  11   6   17.77    1.52
   0  11   6   19.75    1.39
   0 -11  -6   17.63    1.32
   0 -11  -6   21.33    1.39
   0  11   6   17.70    1.45
   0  11   6   21.07    1.39
   0 -11  -7   16.58    1.32
   0 -11  -7   17.63    1.39
   0  11   7   19.88    1.39
   0  11   7   18.62    1.59
   0 -11  -7   17.83    1.32
   0 -11  -7   19.75    1.32
   0  11   7   17.77    1.32
   0  11   7   19.48    1.45
   0 -11  -8   50.79    2.58
   0 -11  -8   52.24    2.64
   0  11   8   49.47    2.71
   0  11   8   51.65    2.58
   0 -11  -8   52.04    2.18
   0 -11  -8   49.80    2.25
   0  11   8   50.59    2.25
   0  11   8   50.79    2.31
   0 -11  -9    9.25    1.06
   0 -11  -9    9.91    1.12
   0  11   9    7.73    1.19
   0  11   9    8.92    1.06
   0 -11  -9    9.58    1.12
   0 -11  -9   12.02    1.19
   0  11   9   10.30    1.12
   0  11   9    8.19    1.19
   0 -11 -10   43.85    2.38
   0 -11 -10   39.82    2.25
   0  11  10   39.76    2.38
   0  11  10   42.80    2.31
   0 -11 -10   40.88    2.05
   0 -11 -10   39.89    1.92
   0  11  10   38.37    2.05
   0  11  10   38.44    1.98
   0 -11 -11    7.20    1.06
   0 -11 -11    5.88    0.99
   0  11  11    6.27    1.12
   0  11  11    7.13    1.06
   0 -11 -11    7.79    1.06
   0 -11 -11    4.23    0.92
   0  11  11    4.23    0.99
   0  11  11    3.43    0.99
   0 -11 -12    0.66    0.86
   0  11  12    2.31    0.86
   0  11  12    3.24    0.99
   0 -11 -12    3.70    0.92
   0 -11 -12    1.78    0.86
   0  11  12    3.43    0.99
   0  11  12    1.39    0.86
   0 -11 -13    6.21    1.06
   0 -11 -13    4.95    0.99
   0  11  13    6.93    1.06
   0  11  13    4.89    1.12
   0 -11 -13    6.60    0.99
   0 -11 -13    5.75    0.99
   0  11  13    5.28    0.99
   0  11  13    3.96    1.06
   0  11  14   33.42    2.11
   0  11  14   34.74    2.31
   0 -11 -14   35.60    1.92
   0 -11 -14   31.37    1.78
   0  11  14   36.65    2.05
   0  11  14   34.21    1.92
   0  11  15    7.79    1.06
   0  11  15    7.46    1.25
   0 -11 -15    5.35    1.06
   0  11  15    5.68    1.19
   0 -11 -16    0.26    0.59
   0 -11 -16    2.31    0.99
   0  11  16   -0.13    0.99
   0  11  16    1.52    0.79
   0 -11 -16   -0.59    0.86
   0 -11 -16   -0.46    0.86
   0  11  16    0.20    0.92
   0  11  16    0.20    0.86
   0 -11 -17    1.78    0.86
   0 -11 -17    0.07    0.59
   0  11  17    2.58    0.92
   0  11  17    1.19    0.92
   0 -11 -17    0.92    0.92
   0 -11 -17    0.99    0.86
   0  11  17    2.44    0.99
   0  11  17    2.11    0.86
   0 -11 -18    0.00    0.53
   0 -11 -18    0.59    0.86
   0  11  18   -0.92    0.86
   0  11  18    0.59    0.99
   0 -11 -18   -1.32    0.92
   0 -11 -18    0.99    0.86
   0  11  18    1.45    0.86
   0  11  18   -0.13    0.92
   0  11  19   34.47    2.31
   0  11  19   30.97    2.38
   0 -11 -19   28.80    1.78
   0 -11 -19   33.29    2.11
   0  11  19   27.61    1.78
   0  11  19   32.10    2.05
   0 -11 -20    0.07    0.53
   0 -11 -20    0.00    0.99
   0  11  20   -0.20    1.06
   0  11  20    0.26    1.06
   0 -11 -20    0.99    0.86
   0 -11 -20    0.79    0.92
   0  11  20    0.07    0.99
   0  11  20   -0.46    0.99
   0  11  21    4.09    1.19
   0  11  21    4.09    1.32
   0 -11 -21    5.35    1.12
   0 -11 -21    7.07    1.19
   0  11  21    4.09    1.19
   0  11  21    5.28    1.12
   0 -11 -22    2.18    0.92
   0 -11 -22    0.20    0.46
   0  11  22    1.78    1.19
   0  11  22    2.71    1.12
   0 -11 -22    3.50    1.12
   0 -11 -22    2.31    1.06
   0  11  22    2.64    1.12
   0  11  22    2.31    1.06
   0 -12  17    2.97    0.99
   0 -12  17    2.51    0.99
   0  12 -17    3.43    1.06
   0  12 -17    2.38    1.12
   0  12 -15    6.93    0.99
   0  12 -15    7.20    1.32
   0  12 -15    8.72    1.19
   0 -12  14    1.78    0.99
   0 -12  14    1.12    0.79
   0  12 -14    3.57    0.92
   0  12 -14    2.97    0.86
   0 -12  14    2.31    0.99
   0 -12  14    1.45    0.92
   0  12 -14    1.92    0.92
   0  12 -14    1.45    0.99
   0 -12  13    0.59    0.79
   0 -12  13   -1.72    0.86
   0  12 -13    1.39    0.79
   0  12 -13    0.73    0.79
   0 -12  13    1.19    0.86
   0 -12  13    1.92    0.86
   0  12 -13   -0.59    0.79
   0  12 -13    0.86    0.92
   0 -12  12    1.45    0.92
   0 -12  12    1.59    0.79
   0  12 -12    0.53    0.79
   0  12 -12    0.59    0.79
   0 -12  12    2.11    0.92
   0 -12  12    0.92    0.79
   0  12 -12   -0.46    0.92
   0  12 -12    0.00    0.79
   0 -12  11   17.90    1.45
   0 -12  11   16.84    1.59
   0 -12  11   14.46    1.32
   0 -12  11   15.65    1.25
   0  12 -11   14.33    1.25
   0  12 -11   15.78    1.45
   0 -12  10    6.14    0.99
   0 -12  10    4.29    1.12
   0 -12  10    7.66    1.06
   0 -12  10    7.40    0.99
   0  12 -10    6.14    0.92
   0  12 -10    6.47    1.12
   0 -12   9   52.24    2.64
   0 -12   9   51.05    2.84
   0 -12   9   52.90    2.31
   0 -12   9   54.95    2.18
   0  12  -9   51.84    2.38
   0  12  -9   53.89    2.18
   0 -12   8   38.37    2.38
   0 -12   8   44.58    2.38
   0 -12   8   42.73    2.11
   0 -12   8   41.81    1.92
   0  12  -8   47.09    2.25
   0  12  -8   41.67    1.92
   0 -12   7   26.62    1.72
   0 -12   7   29.39    2.05
   0 -12   7   30.91    1.85
   0 -12   7   27.74    1.52
   0  12  -7   26.95    1.59
   0  12  -7   28.53    1.72
   0 -12   6   17.96    1.59
   0 -12   6   14.66    1.25
   0 -12   6   17.83    1.39
   0 -12   6   16.78    1.25
   0  12  -6   20.28    1.32
   0  12  -6   15.92    1.32
   0 -12   5    0.26    0.79
   0  12  -5   -0.33    0.53
   0  12  -5    1.12    0.79
   0 -12   5   -0.13    0.79
   0 -12   5   -0.20    0.73
   0  12  -5    0.07    0.86
   0  12  -5    0.26    0.73
   0 -12   4   79.78    3.63
   0 -12   4   78.72    3.76
   0 -12   4   75.82    2.91
   0 -12   4   79.38    2.77
   0 -12   3   45.97    2.58
   0 -12   3   44.51    2.38
   0  12  -3   42.33    2.38
   0 -12   3   46.30    2.18
   0 -12   3   41.87    1.85
   0 -12   2    0.13    0.73
   0 -12   2    0.46    0.79
   0  12  -2    1.25    0.73
   0  12  -2    0.79    0.66
   0 -12   2    0.26    0.66
   0 -12   2   -0.07    0.73
   0  12  -2   -0.07    0.73
   0  12  -2   -0.79    0.79
   0 -12   1    0.66    0.73
   0 -12   1    0.99    0.79
   0  12  -1    0.20    0.73
   0  12  -1    1.59    0.86
   0 -12   1    0.33    0.79
   0 -12   1    0.92    0.73
   0  12  -1    1.12    0.86
   0  12  -1    1.39    0.73
   0 -12   0  141.00    5.94
   0 -12   0  136.78    5.68
   0  12   0  135.26    5.68
   0  12   0  137.24    5.88
   0 -12   0  139.68    4.23
   0 -12   0  132.48    4.16
   0  12   0  141.00    4.36
   0  12   0  135.98    4.29
   0 -12  -1   15.32    1.25
   0 -12  -1   14.20    1.32
   0  12   1   14.20    1.45
   0  12   1   13.80    1.25
   0 -12  -1   13.74    1.25
   0 -12  -1   12.75    1.06
   0  12   1   12.35    1.19
   0  12   1   14.73    1.25
   0 -12  -2   95.57    4.16
   0 -12  -2   84.87    3.90
   0  12   2   90.41    3.96
   0  12   2   89.75    4.23
   0 -12  -2   90.48    3.17
   0 -12  -2   89.56    3.04
   0  12   2   91.47    3.17
   0  12   2   91.27    3.24
   0 -12  -3   43.59    2.31
   0 -12  -3   42.73    2.38
   0  12   3   42.66    2.25
   0  12   3   41.67    2.44
   0 -12  -3   42.66    1.92
   0 -12  -3   41.74    1.98
   0  12   3   40.68    1.98
   0  12   3   44.18    2.11
   0 -12  -4    5.94    0.92
   0 -12  -4    4.23    0.92
   0  12   4    5.75    1.12
   0  12   4    5.68    0.92
   0 -12  -4    4.49    0.92
   0 -12  -4    5.22    0.86
   0  12   4    3.57    0.99
   0  12   4    2.64    0.86
   0 -12  -5   67.17    3.17
   0 -12  -5   64.92    3.17
   0  12   5   68.29    3.43
   0  12   5   69.94    3.30
   0 -12  -5   68.82    2.58
   0 -12  -5   61.95    2.58
   0  12   5   71.72    2.84
   0  12   5   67.23    2.71
   0 -12  -6   26.15    1.72
   0 -12  -6   28.60    1.78
   0  12   6   29.32    1.78
   0  12   6   25.56    1.85
   0 -12  -6   28.80    1.59
   0 -12  -6   31.97    1.72
   0  12   6   28.20    1.72
   0  12   6   26.62    1.65
   0 -12  -7   19.61    1.52
   0 -12  -7   21.60    1.52
   0  12   7   22.19    1.52
   0  12   7   20.61    1.65
   0 -12  -7   21.13    1.39
   0 -12  -7   21.66    1.52
   0  12   7   21.60    1.52
   0  12   7   19.28    1.52
   0 -12  -8    3.30    0.86
   0 -12  -8    3.50    0.86
   0  12   8    4.69    0.92
   0  12   8    1.32    0.92
   0 -12  -8    1.12    0.79
   0 -12  -8    2.05    0.86
   0  12   8    4.03    0.99
   0  12   8    3.70    0.92
   0 -12  -9   11.29    1.12
   0 -12  -9   10.77    1.19
   0  12   9   11.23    1.32
   0  12   9   11.43    1.12
   0 -12  -9   10.70    1.19
   0 -12  -9   11.76    1.19
   0  12   9   11.69    1.25
   0  12   9    9.71    1.19
   0 -12 -10    8.52    1.12
   0 -12 -10    8.52    1.06
   0  12  10    7.93    1.06
   0  12  10    7.86    1.25
   0 -12 -10    8.85    1.12
   0 -12 -10    9.51    1.12
   0  12  10    8.26    1.19
   0  12  10    7.99    1.12
   0 -12 -11  107.19    4.76
   0 -12 -11  100.91    4.56
   0  12  11  105.14    4.62
   0  12  11  100.65    4.69
   0 -12 -11  101.44    3.63
   0 -12 -11  101.58    3.43
   0  12  11  103.16    3.70
   0  12  11  103.56    3.70
   0  12  12    2.71    0.99
   0  12  12    1.39    0.79
   0 -12 -12    0.07    0.79
   0 -12 -12    0.26    0.79
   0  12  12   -0.59    0.86
   0  12  12    1.45    0.92
   0 -12 -13   17.90    1.59
   0 -12 -13   15.78    1.45
   0  12  13   16.51    1.45
   0  12  13   13.80    1.52
   0 -12 -13   14.07    1.39
   0 -12 -13   15.72    1.32
   0  12  13   17.24    1.52
   0  12  13   18.10    1.45
   0 -12 -14    0.99    0.79
   0 -12 -14    2.25    0.92
   0  12  14    0.00    0.86
   0  12  14   -0.66    0.99
   0 -12 -15    6.47    1.06
   0 -12 -15   10.37    1.25
   0  12  15   12.88    1.52
   0  12  15   10.70    1.25
   0 -12 -15   10.77    1.19
   0 -12 -15   11.16    1.19
   0  12  15   10.77    1.19
   0  12  15   12.28    1.32
   0  12  16    2.91    1.12
   0  12  16    3.63    0.99
   0 -12 -16    4.23    0.99
   0 -12 -16    3.43    0.92
   0  12  16    3.10    1.06
   0  12  16    2.71    0.92
   0 -12 -17   -0.13    0.59
   0 -12 -17    0.92    0.86
   0  12  17   -0.33    0.92
   0  12  17   -1.59    0.92
   0 -12 -17    0.73    0.86
   0 -12 -17    0.33    0.86
   0  12  17    3.04    0.92
   0  12  17    1.32    0.99
   0 -12 -18    1.45    0.92
   0 -12 -18    0.66    0.66
   0  12  18    1.52    1.12
   0  12  18    3.63    1.06
   0 -12 -18    1.65    0.86
   0 -12 -18    2.84    0.99
   0  12  18    2.64    0.92
   0  12  18    1.19    0.92
   0 -12 -19   -0.40    0.59
   0 -12 -19    2.38    1.12
   0  12  19    3.50    1.12
   0  12  19    1.45    1.25
   0 -12 -19    2.97    1.06
   0  12  19    3.17    1.06
   0  12  19    1.98    1.06
   0 -12 -20    2.71    1.06
   0 -12 -20    0.40    0.53
   0  12  20    4.76    1.25
   0  12  20    1.65    1.32
   0 -12 -20    3.70    0.99
   0 -12 -20    3.90    0.99
   0  12  20    3.43    1.06
   0  12  20    2.11    1.12
   0 -12 -21    0.79    0.92
   0  12  21    1.06    1.06
   0  12  21    0.20    1.32
   0 -12 -21   -1.25    0.92
   0 -12 -21   -0.33    0.99
   0  12  21    0.26    1.06
   0  12  21    0.20    0.92
   0 -12 -22    0.86    0.99
   0 -12 -22    3.70    1.06
   0  12  22    1.59    1.06
   0 -13  16   -0.07    0.86
   0 -13  16   -1.19    0.86
   0  13 -16    0.73    0.92
   0  13 -16   -1.25    0.92
   0 -13  15   10.24    1.25
   0 -13  15   11.43    1.25
   0 -13  15    7.07    1.19
   0 -13  15   10.24    1.32
   0  13 -15    9.77    1.32
   0 -13  14    2.18    0.99
   0 -13  14    2.91    0.92
   0  13 -14    3.76    0.99
   0  13 -14    1.85    0.92
   0  13 -14    4.76    1.12
   0 -13  13    7.46    1.32
   0 -13  13    9.84    1.25
   0  13 -13    8.19    1.25
   0  13 -13   10.10    1.32
   0 -13  13   10.70    1.32
   0 -13  13    9.05    1.12
   0  13 -13   11.89    1.32
   0  13 -13    9.05    1.19
   0 -13  12    3.17    0.92
   0 -13  12    5.88    1.19
   0 -13  12    3.83    0.99
   0 -13  12    4.82    0.99
   0  13 -12    4.82    0.92
   0  13 -12    5.61    1.12
   0 -13  11    1.12    0.92
   0 -13  11   -0.13    0.79
   0  13 -11    1.98    0.86
   0  13 -11   -0.40    0.59
   0 -13  11    0.59    0.92
   0 -13  11    0.79    0.79
   0  13 -11    1.32    0.92
   0  13 -11    0.26    0.79
   0 -13  10    2.25    0.86
   0 -13  10    0.86    0.92
   0 -13  10    0.33    0.79
   0 -13  10    3.10    0.92
   0  13 -10    1.32    0.79
   0  13 -10    2.38    0.99
   0 -13   9    8.12    1.19
   0 -13   9    6.80    1.06
   0 -13   9    6.60    0.99
   0 -13   9    7.53    1.12
   0  13  -9   10.70    1.25
   0  13  -9    7.13    0.99
   0 -13   8   62.35    3.30
   0 -13   8   62.54    3.10
   0 -13   8   66.04    2.77
   0 -13   8   59.18    2.38
   0  13  -8   61.55    2.51
   0  13  -8   68.22    2.84
   0 -13   7    5.42    1.06
   0 -13   7    5.55    0.92
   0 -13   7    9.58    1.12
   0 -13   7    7.73    0.99
   0  13  -7    7.20    1.12
   0  13  -7    7.79    1.06
   0 -13   6    1.06    0.99
   0 -13   6   -0.20    0.73
   0  13  -6    0.20    0.53
   0  13  -6    1.06    0.79
   0 -13   6    0.79    0.73
   0 -13   6    1.45    0.86
   0  13  -6   -0.59    0.73
   0  13  -6    0.53    0.92
   0 -13   5    1.45    1.06
   0 -13   5    0.33    0.73
   0  13  -5    0.33    0.79
   0  13  -5    0.92    0.53
   0 -13   5   -0.86    0.73
   0 -13   5    0.59    0.79
   0  13  -5   -0.46    0.86
   0  13  -5    0.73    0.73
   0 -13   4    1.92    0.86
   0 -13   4    3.70    1.12
   0 -13   4    2.77    0.92
   0 -13   4    2.84    0.79
   0  13  -4    1.65    0.79
   0  13  -4    2.71    0.92
   0 -13   3    9.58    1.12
   0 -13   3    6.87    1.12
   0 -13   3    7.66    1.12
   0 -13   3    8.65    0.99
   0  13  -3    7.46    1.12
   0  13  -3    7.93    1.06
   0 -13   2   10.04    1.25
   0 -13   2   10.57    1.12
   0 -13   2    8.59    0.99
   0 -13   2    8.52    1.06
   0 -13   1   -0.46    0.73
   0 -13   1   -1.39    0.86
   0  13  -1    0.13    0.79
   0  13  -1   -0.13    0.73
   0 -13   1   -0.99    0.66
   0 -13   1   -0.59    0.79
   0  13  -1   -0.26    0.79
   0  13  -1    0.00    0.73
   0 -13   0    8.45    1.19
   0 -13   0    9.97    1.12
   0  13   0   11.23    1.19
   0  13   0   11.16    1.32
   0 -13   0    9.77    1.12
   0 -13   0   10.96    1.06
   0  13   0    9.58    1.12
   0  13   0    8.19    1.12
   0 -13  -1    3.96    0.99
   0 -13  -1    4.42    0.86
   0  13   1    4.62    0.92
   0  13   1    4.69    1.06
   0 -13  -1    2.51    0.79
   0 -13  -1    4.42    0.99
   0  13   1    4.09    0.92
   0  13   1    3.76    0.99
   0 -13  -2   47.22    2.44
   0 -13  -2   44.58    2.58
   0  13   2   42.86    2.31
   0  13   2   42.00    2.58
   0 -13  -2   43.92    1.98
   0 -13  -2   43.59    2.11
   0  13   2   43.85    2.18
   0  13   2   41.15    2.05
   0 -13  -3    3.96    0.92
   0 -13  -3    3.17    0.86
   0  13   3    3.17    0.86
   0  13   3    4.62    1.06
   0 -13  -3    3.96    0.99
   0 -13  -3    3.70    0.86
   0  13   3    3.37    0.99
   0  13   3    2.91    0.92
   0 -13  -4    2.84    0.79
   0 -13  -4    0.20    0.79
   0  13   4    0.73    0.79
   0  13   4    0.66    0.99
   0 -13  -4    2.18    0.79
   0 -13  -4    1.19    0.79
   0  13   4    1.06    0.79
   0  13   4    2.25    0.92
   0 -13  -5   12.81    1.19
   0 -13  -5   12.22    1.25
   0  13   5   10.90    1.32
   0  13   5   13.27    1.19
   0 -13  -5   13.14    1.12
   0 -13  -5   11.23    1.19
   0  13   5   12.75    1.32
   0  13   5   11.89    1.19
   0 -13  -6   13.27    1.32
   0 -13  -6   14.13    1.25
   0  13   6   14.40    1.45
   0  13   6   16.71    1.32
   0 -13  -6   12.48    1.25
   0 -13  -6   14.46    1.19
   0  13   6   15.06    1.32
   0  13   6   13.54    1.39
   0 -13  -7   13.54    1.25
   0 -13  -7   12.09    1.25
   0  13   7   13.87    1.45
   0  13   7   12.02    1.19
   0 -13  -7   12.81    1.12
   0 -13  -7   12.42    1.25
   0  13   7   13.54    1.32
   0  13   7   13.67    1.39
   0 -13  -8   51.84    2.77
   0 -13  -8   49.73    2.58
   0  13   8   53.43    2.71
   0  13   8   48.34    2.77
   0 -13  -8   47.95    2.18
   0 -13  -8   50.85    2.31
   0  13   8   49.99    2.38
   0  13   8   52.04    2.38
   0 -13  -9    0.66    0.86
   0 -13  -9    0.59    0.79
   0  13   9    1.72    0.86
   0  13   9    3.24    0.99
   0 -13  -9    1.78    0.86
   0 -13  -9    2.44    0.86
   0  13   9    2.11    0.92
   0  13   9    3.17    0.99
   0 -13 -10   16.71    1.45
   0 -13 -10   18.10    1.45
   0  13  10   13.54    1.45
   0  13  10   17.17    1.45
   0 -13 -10   15.92    1.32
   0 -13 -10   16.18    1.39
   0  13  10   14.27    1.39
   0  13  10   18.69    1.52
   0 -13 -11   -1.52    0.79
   0 -13 -11    1.52    0.86
   0  13  11   -1.65    0.92
   0  13  11    0.59    0.86
   0 -13 -11    0.66    0.73
   0 -13 -11   -1.85    0.86
   0  13  11   -0.46    0.92
   0  13  11   -0.79    0.86
   0 -13 -12    9.64    1.19
   0 -13 -12    8.52    1.39
   0  13  12   10.96    1.32
   0  13  12   10.83    1.19
   0 -13 -13    5.61    1.12
   0 -13 -13    3.63    0.99
   0  13  13    4.95    1.19
   0  13  13    4.69    0.99
   0 -13 -13    3.76    0.99
   0 -13 -13    4.82    0.92
   0  13  13    3.70    0.99
   0  13  13    3.76    1.06
   0  13  14   56.00    2.97
   0 -13 -14   54.55    2.38
   0 -13 -14   57.19    2.58
   0  13  14   56.40    2.58
   0  13  14   56.34    2.58
   0 -13 -15    1.78    0.92
   0  13  15   -1.72    0.99
   0  13  15   -0.07    0.86
   0 -13 -15   -0.33    0.73
   0 -13 -15    0.73    0.79
   0  13  15    1.32    0.92
   0  13  15    1.92    0.86
   0 -13 -16    2.05    0.99
   0 -13 -16    2.91    0.86
   0 -13 -16    2.38    0.86
   0  13  16    3.04    0.92
   0  13  16    3.96    0.99
   0 -13 -17    4.09    0.99
   0 -13 -17    6.27    1.06
   0  13  17    6.41    1.06
   0  13  17    3.96    1.06
   0 -13 -18   -0.59    0.66
   0  13  18    0.59    0.99
   0  13  18    0.13    1.25
   0 -13 -18    0.40    0.86
   0 -13 -18    0.59    0.86
   0  13  18    1.52    0.99
   0  13  18    2.18    0.99
   0 -13 -19   -0.86    0.59
   0 -13 -19   -0.46    0.99
   0  13  19   -0.59    1.19
   0  13  19    0.07    0.99
   0 -13 -19    1.72    0.92
   0 -13 -19   -1.12    1.06
   0  13  19    0.73    0.92
   0  13  19    1.39    0.99
   0 -13 -20   -0.33    0.59
   0 -13 -20    1.12    0.99
   0  13  20    0.79    1.19
   0  13  20   -0.33    1.06
   0 -13 -20    0.53    0.92
   0 -13 -20    0.40    0.92
   0  13  20    2.05    1.06
   0  13  20    2.44    0.99
   0 -13 -21    0.20    0.92
   0 -13 -21   -0.40    0.53
   0  13  21    0.59    1.12
   0  13  21    1.39    1.06
   0 -13 -21   -0.46    0.92
   0 -14  14    1.59    0.86
   0 -14  14    1.59    0.86
   0 -14  14    1.25    0.92
   0 -14  14    2.58    0.92
   0  14 -14   -0.86    0.99
   0  14 -14    0.92    0.92
   0 -14  13    4.76    0.99
   0 -14  13    3.63    1.12
   0  14 -13    2.18    0.99
   0  14 -13   -0.20    0.59
   0 -14  13    3.90    1.06
   0 -14  13    1.45    0.92
   0  14 -13    3.04    1.06
   0 -14  12    0.20    0.99
   0 -14  12    0.26    0.79
   0  14 -12    0.46    0.86
   0  14 -12   -0.46    0.66
   0 -14  11    4.49    1.19
   0 -14  11    4.36    0.99
   0 -14  11    5.09    1.12
   0 -14  11    4.76    0.99
   0  14 -11    3.76    1.06
   0 -14  10    1.72    0.99
   0 -14  10    1.12    0.86
   0  14 -10   -0.59    0.59
   0  14 -10    0.33    0.86
   0 -14  10    2.25    0.86
   0 -14  10    1.65    0.92
   0  14 -10    1.39    0.92
   0  14 -10    0.99    0.86
   0 -14   9    6.54    1.12
   0 -14   9    5.48    1.12
   0 -14   9    3.90    0.86
   0 -14   9    4.56    1.06
   0  14  -9    5.75    1.06
   0  14  -9    5.09    0.99
   0 -14   8    2.11    0.79
   0 -14   8    2.25    0.92
   0  14  -8    0.73    0.92
   0  14  -8   -0.66    0.53
   0 -14   8    0.46    0.79
   0 -14   8    0.86    0.92
   0  14  -8    1.19    0.92
   0  14  -8    0.40    0.86
   0 -14   7    0.79    0.73
   0 -14   7    0.26    0.79
   0  14  -7   -0.46    0.46
   0  14  -7    0.99    0.86
   0 -14   7    0.00    0.73
   0 -14   7    0.13    0.86
   0  14  -7    0.73    0.92
   0  14  -7    0.99    0.79
   0 -14   6    8.32    1.06
   0 -14   6   12.28    1.45
   0 -14   6   10.24    1.06
   0 -14   6   11.16    1.19
   0  14  -6   12.48    1.32
   0  14  -6   13.14    1.19
   0 -14   5    5.68    0.99
   0 -14   5    6.47    1.25
   0 -14   5    5.68    0.92
   0 -14   5    4.42    0.99
   0  14  -5    5.75    1.06
   0  14  -5    6.21    0.99
   0 -14   4    5.15    1.25
   0 -14   4    5.48    0.92
   0 -14   4    6.67    0.92
   0 -14   4    6.08    1.06
   0  14  -4    6.54    0.99
   0  14  -4    5.35    1.06
   0 -14   3    0.33    0.73
   0 -14   3    1.39    0.99
   0  14  -3   -0.66    0.73
   0  14  -3    0.00    0.53
   0 -14   3    0.86    0.73
   0 -14   3   -0.13    0.86
   0  14  -3    0.92    0.86
   0  14  -3    0.00    0.79
   0 -14   2    2.91    0.99
   0 -14   2    2.58    0.86
   0 -14   2    3.57    0.99
   0 -14   2    0.66    0.79
   0  14  -2    1.25    0.86
   0  14  -2    0.66    0.86
   0 -14   1    5.09    0.92
   0 -14   1    4.89    1.06
   0  14  -1    1.85    0.79
   0  14  -1    3.50    0.92
   0 -14   1    4.89    0.86
   0 -14   1    3.96    0.99
   0 -14   0   11.29    1.32
   0 -14   0   10.96    1.19
   0  14   0   11.03    1.19
   0  14   0    8.39    1.12
   0 -14   0   10.43    1.19
   0 -14   0   10.17    1.06
   0  14   0    9.11    1.19
   0  14   0   10.83    1.19
   0 -14  -1   23.25    1.65
   0 -14  -1   22.12    1.78
   0  14   1   24.04    1.65
   0  14   1   20.34    1.72
   0 -14  -1   22.06    1.45
   0 -14  -1   21.86    1.59
   0  14   1   21.00    1.52
   0  14   1   22.65    1.59
   0 -14  -2    6.67    1.12
   0 -14  -2    6.67    0.99
   0  14   2    8.92    1.12
   0  14   2    8.12    1.19
   0 -14  -2    8.45    1.12
   0 -14  -2    6.60    0.92
   0  14   2    9.25    1.19
   0  14   2    9.31    1.12
   0 -14  -3    0.46    0.73
   0 -14  -3    0.66    0.79
   0  14   3   -0.59    0.79
   0  14   3   -1.12    0.79
   0 -14  -3    0.00    0.66
   0 -14  -3    0.92    0.79
   0  14   3    0.73    0.79
   0  14   3   -0.86    0.86
   0 -14  -4    0.33    0.73
   0 -14  -4    1.25    0.86
   0  14   4   -0.13    0.92
   0  14   4   -0.33    0.79
   0 -14  -4    0.86    0.73
   0 -14  -4    0.07    0.79
   0  14   4   -0.20    0.79
   0  14   4   -0.66    0.86
   0 -14  -5    4.62    0.92
   0 -14  -5    5.15    1.06
   0  14   5    4.82    1.06
   0  14   5    3.83    0.92
   0 -14  -5    4.69    0.86
   0 -14  -5    4.69    0.99
   0  14   5    4.42    0.99
   0  14   5    5.42    1.12
   0 -14  -6    5.28    1.06
   0 -14  -6    5.22    0.92
   0  14   6    4.82    1.12
   0  14   6    6.14    1.06
   0 -14  -6    4.56    0.99
   0 -14  -6    5.61    0.92
   0  14   6    6.34    1.12
   0  14   6    3.63    0.99
   0 -14  -7   16.44    1.52
   0 -14  -7   17.90    1.45
   0  14   7   16.18    1.52
   0  14   7   16.91    1.45
   0 -14  -7   15.59    1.25
   0 -14  -7   17.37    1.45
   0  14   7   16.84    1.39
   0  14   7   17.90    1.52
   0 -14  -8    4.49    0.99
   0 -14  -8    5.28    0.99
   0  14   8    4.95    0.99
   0  14   8    2.77    1.06
   0 -14  -8    2.18    0.86
   0 -14  -8    3.63    0.92
   0  14   8    3.96    0.99
   0  14   8    3.10    1.06
   0 -14  -9   -0.59    0.73
   0 -14  -9    0.33    0.86
   0  14   9    0.92    0.86
   0  14   9   -0.07    0.92
   0 -14  -9   -1.12    0.86
   0  14   9    0.73    0.99
   0 -14 -10    0.73    0.92
   0  14  10   -0.13    0.99
   0 -14 -11   19.61    1.52
   0 -14 -11   22.92    1.52
   0  14  11   19.81    1.65
   0  14  11   21.13    1.59
   0 -14 -12    4.82    0.92
   0 -14 -12    6.47    1.06
   0  14  12    6.87    1.12
   0  14  12    5.55    1.06
   0 -14 -13    4.09    0.99
   0  14  13    4.03    1.06
   0 -14 -13    2.58    0.86
   0 -14 -13    4.62    0.99
   0  14  13    3.90    0.99
   0  14  13    2.97    0.99
   0 -14 -14    4.69    0.99
   0 -14 -14    7.33    1.19
   0  14  14    6.47    1.25
   0 -14 -14    5.09    0.92
   0 -14 -14    4.95    1.06
   0  14  14    6.34    1.12
   0  14  14    4.56    1.06
   0 -14 -15    0.13    0.79
   0 -14 -15    0.33    0.86
   0  14  15    0.46    1.06
   0  14  15    0.66    0.92
   0 -14 -15    0.92    0.79
   0 -14 -15    0.53    0.73
   0  14  15    0.26    0.86
   0  14  15   -0.13    0.86
   0 -14 -16    2.05    0.99
   0 -14 -16    1.39    0.86
   0  14  16    1.19    1.12
   0  14  16    1.19    0.92
   0 -14 -16    0.99    0.86
   0 -14 -16    0.99    0.86
   0  14  16    0.33    0.86
   0  14  16    0.86    0.86
   0 -14 -17    1.06    0.86
   0 -14 -17    1.06    0.86
   0  14  17    1.59    0.92
   0  14  17    0.92    1.12
   0 -14 -17    1.92    0.92
   0 -14 -17    1.25    0.86
   0  14  17    1.45    0.86
   0  14  17    2.77    0.99
   0 -14 -18    2.51    0.92
   0 -14 -18    0.86    0.99
   0  14  18    0.99    0.99
   0  14  18    3.17    1.19
   0 -14 -18    4.03    0.99
   0 -14 -18    1.32    0.92
   0  14  18    1.25    0.99
   0  14  18    2.11    0.99
   0 -14 -19    0.46    0.73
   0 -14 -19    0.99    0.99
   0  14  19    0.46    1.06
   0  14  19    0.13    1.19
   0 -14 -19    2.58    0.92
   0 -14 -19    0.79    0.86
   0  14  19    1.72    0.99
   0  14  19   -0.20    0.99
   0 -14 -20    2.11    0.99
   0 -14 -20    0.46    0.59
   0 -15  13    0.26    0.86
   0 -15  13    0.86    0.86
   0  15 -13    0.53    0.99
   0 -15  13    1.92    0.86
   0 -15  13   -0.13    0.92
   0  15 -13    0.79    0.92
   0  15 -13   -0.92    0.92
   0 -15  12    1.45    0.92
   0 -15  12    0.00    0.92
   0  15 -12    0.26    0.59
   0  15 -12    0.79    0.92
   0 -15  12    0.33    0.92
   0 -15  12   -0.07    0.86
   0  15 -12    0.07    0.92
   0  15 -12    0.59    0.92
   0 -15  11    2.77    1.06
   0 -15  11    2.05    0.99
   0  15 -11    3.76    1.06
   0  15 -11   -0.26   21.60
   0 -15  11    2.51    0.99
   0 -15  11    1.39    0.86
   0  15 -11    2.38    0.92
   0  15 -11    2.31    1.06
   0 -15  10    1.98    0.99
   0 -15  10    1.78    0.92
   0 -15  10   -0.73    0.99
   0 -15  10   -0.46    0.73
   0  15 -10    1.85    0.86
   0 -15   9    5.75    1.12
   0 -15   9    6.47    1.25
   0 -15   8    2.38    0.92
   0 -15   8    3.17    1.06
   0  15  -8    2.11    0.99
   0  15  -8    0.13    0.53
   0 -15   8    2.11    0.92
   0  15  -8    1.92    0.99
   0 -15   7    8.92    1.32
   0 -15   7    9.11    1.19
   0 -15   7    8.92    1.32
   0 -15   7    9.51    1.12
   0  15  -7    9.18    1.19
   0  15  -7   10.77    1.39
   0 -15   6    3.57    0.99
   0 -15   6    5.15    0.99
   0 -15   6    3.70    1.06
   0 -15   6    3.70    0.92
   0  15  -6    3.96    1.06
   0  15  -6    6.80    1.06
   0 -15   5    7.07    1.25
   0 -15   5    5.15    0.99
   0 -15   5    5.02    1.12
   0 -15   5    6.47    0.99
   0  15  -5    6.93    1.12
   0  15  -5    9.51    1.25
   0 -15   4   11.82    1.52
   0 -15   4    9.31    1.12
   0 -15   4   10.83    1.25
   0 -15   4    8.65    1.06
   0 -15   3   -0.26    1.19
   0  15  -3    0.73    0.79
   0  15  -3    0.53    0.59
   0 -15   3    1.52    0.92
   0 -15   3    2.84    0.79
   0  15  -3    1.45    0.92
   0  15  -3    0.99    0.86
   0 -15   2    4.29    1.12
   0 -15   2    2.58    0.86
   0 -15   2    2.84    0.99
   0 -15   2    2.91    0.79
   0  15  -2    2.44    0.92
   0  15  -2    1.65    0.99
   0 -15   1    4.09    1.19
   0 -15   1    4.29    0.92
   0 -15   1    3.50    0.99
   0 -15   1    3.43    0.86
   0  15  -1    4.36    0.99
   0  15  -1    4.62    1.06
   0 -15   0    5.48    1.06
   0 -15   0    5.35    1.19
   0  15   0    3.96    1.06
   0  15   0    5.88    1.06
   0 -15   0    4.76    0.99
   0 -15   0    4.36    0.86
   0  15   0    4.42    1.12
   0 -15  -1    2.18    0.92
   0 -15  -1    1.25    1.06
   0  15   1    0.73    0.92
   0  15   1   -0.07    0.86
   0 -15  -1    2.05    0.73
   0 -15  -1    1.06    0.86
   0  15   1    1.25    0.92
   0  15   1   -0.66    0.92
   0 -15  -2   -0.86    0.86
   0 -15  -2    1.39    0.99
   0  15   2    2.91    0.99
   0 -15  -2    0.07    0.73
   0 -15  -2    0.13    0.86
   0  15   2   -0.20    0.86
   0  15   2    0.92    0.92
   0 -15  -3    1.32    0.99
   0  15   3    1.32    0.99
   0 -15  -3    3.10    0.92
   0 -15  -3    2.71    0.79
   0  15   3    2.11    0.92
   0  15   3    2.11    0.92
   0 -15  -4    8.12    1.19
   0 -15  -4    9.64    1.06
   0  15   4    9.64    1.25
   0  15   4    9.31    1.19
   0 -15  -5    2.97    1.06
   0 -15  -5    4.23    0.92
   0  15   5    5.15    1.12
   0 -15  -6   21.33    1.98
   0 -15  -7    3.96    0.99
   0  15   7    4.36    0.99
   0 -15  -7    1.65    1.19
   0  15   7    2.25    1.06
   0 -15  -8   12.22    1.25
   0 -15  -8    8.12    1.25
   0  15   8    8.98    1.32
   0  15   8   11.03    1.19
   0 -15  -8    8.85    1.12
   0 -15  -8    9.77    1.19
   0  15   8    9.05    1.19
   0  15   8    9.31    1.25
   0 -15  -9    0.13    0.79
   0 -15  -9    0.20    0.86
   0  15   9    0.73    0.99
   0  15   9   -0.92    0.79
   0 -15  -9   -1.32    0.79
   0 -15  -9    1.06    0.73
   0  15   9   -0.73    0.92
   0  15   9    1.39    0.86
   0 -15 -10   -0.13    0.73
   0 -15 -10    0.00    0.92
   0  15  10    0.86    0.79
   0  15  10    0.13    0.99
   0 -15 -10    1.52    0.86
   0 -15 -10   -1.12    0.79
   0  15  10   -0.07    0.92
   0  15  10    0.79    0.86
   0 -15 -11    3.76    0.92
   0 -15 -11    4.82    1.12
   0  15  11    2.97    0.92
   0  15  11    6.34    1.19
   0 -15 -11    6.27    1.06
   0 -15 -11    3.90    0.92
   0  15  11    3.24    1.06
   0  15  11    5.22    1.06
   0 -15 -12   -0.46    0.73
   0 -15 -12    0.20    0.86
   0  15  12   -0.86    0.92
   0  15  12    0.20    0.79
   0 -15 -12   -0.20    0.79
   0 -15 -12    0.59    0.73
   0  15  12   -0.07    0.86
   0  15  12   -1.45    0.79
   0 -15 -13    1.12    0.86
   0 -15 -13    1.39    0.92
   0  15  13    0.07    0.86
   0  15  13    1.72    1.06
   0 -15 -13    1.59    0.73
   0 -15 -13    0.99    0.86
   0  15  13    0.00    0.86
   0  15  13    2.31    0.86
   0 -15 -14    2.84    0.92
   0 -15 -14    4.49    1.06
   0  15  14    1.98    1.19
   0 -15 -14    4.16    0.92
   0 -15 -14    4.16    0.86
   0  15  14    1.52    0.86
   0  15  14    4.29    0.99
   0 -15 -15    1.12    0.92
   0 -15 -15    0.07    0.86
   0  15  15    0.59    1.06
   0  15  15    1.45    0.99
   0 -15 -15    0.00    0.79
   0 -15 -15   -0.53    0.73
   0  15  15   -0.20    0.86
   0  15  15    0.73    0.86
   0 -15 -16    5.42    1.12
   0 -15 -16    7.40    1.25
   0  15  16    6.08    1.19
   0  15  16    7.40    1.39
   0 -15 -16    4.95    1.06
   0 -15 -16    7.93    1.06
   0  15  16    3.76    1.06
   0  15  16    5.75    1.12
   0 -15 -17   -0.46    0.92
   0 -15 -17    0.92    0.92
   0  15  17    0.26    0.99
   0  15  17   -0.99    1.06
   0 -15 -17    0.59    0.86
   0 -15 -17    1.19    0.92
   0  15  17    0.53    0.99
   0  15  17    0.07    0.92
   0 -15 -18    0.99    0.86
   0 -15 -18    0.73    0.99
   0  15  18    1.25    1.12
   0  15  18   -0.46    0.99
   0 -15 -18    0.86    0.86
   0 -15 -18   -0.20    0.86
   0  15  18    0.66    0.92
   0  15  18    0.07    0.99
   0 -15 -19    1.32    0.92
   0 -15 -19    0.07    0.86
   0  15  19    0.13    0.99
   0  15  19   -0.46    1.06
   0  16 -11    0.13    0.59
   0 -16  11    0.20    0.86
   0 -16  11   -0.20    0.92
   0  16 -11    1.25    0.92
   0  16 -11   -1.25    0.92
   0  16 -10    0.20    0.66
   0 -16  10    0.99    0.86
   0 -16  10    2.51    0.92
   0  16 -10    1.59    1.06
   0  16 -10    1.98    0.92
   0 -16   9    6.14    0.99
   0 -16   9    7.86    1.19
   0  16  -9    5.22    1.06
   0  16  -9    6.08    1.19
   0  16  -8   -0.46    0.99
   0 -16   8    0.86    0.79
   0 -16   8    0.99    0.92
   0  16  -8    0.00    0.86
   0  16  -8   -0.33    0.99
   0  16  -7    2.58    0.99
   0 -16   7    3.57    0.99
   0 -16   7    3.04    0.86
   0  16  -7    3.10    1.06
   0  16  -7    5.15    1.06
   0 -16   6   -0.40    0.86
   0  16  -6   -0.13    0.86
   0 -16   6    0.99    0.79
   0 -16   6   -0.53    0.92
   0  16  -6   -0.73    0.92
   0  16  -6    0.46    0.99
   0 -16   5    6.01    1.12
   0 -16   5    5.22    1.19
   0  16  -5    5.81    1.12
   0 -16   5    7.99    1.25
   0 -16   5    6.47    1.06
   0  16  -5   10.50    1.32
   0 -16   4    8.72    1.19
   0 -16   4    8.32    1.39
   0  16  -4    7.26    1.12
   0 -16   4    9.18    1.39
   0  16  -4   11.49    1.32
   0 -16   3   15.92    1.78
   0 -16   3   15.52    1.52
   0  16  -3   14.07    1.45
   0 -16   2    3.96    0.92
   0 -16   2    2.25    1.12
   0  16  -2    2.11    0.86
   0  16  -2   -0.13    0.59
   0  16  -2    1.32    1.06
   0 -16   1    1.12    0.79
   0 -16   1    1.45    0.99
   0  16  -1    0.00    0.66
   0  16  -1   -0.13    0.99
   0 -16   0   11.82    1.25
   0 -16   0   14.53    1.59
   0  16   0   13.01    1.32
   0  16   0   13.14    1.52
   0  16   0   12.15    1.52
   0 -16  -1    5.81    0.99
   0 -16  -1    5.35    1.19
   0  16   1    4.76    0.92
   0  16   1    5.55    1.25
   0 -16  -1    5.35    1.19
   0 -16  -2    1.32    0.79
   0 -16  -2    1.45    0.92
   0  16   2   -0.53    0.79
   0  16   2   -0.20    0.92
   0 -16  -2   -0.40    0.86
   0  16   2    0.26    0.92
   0 -16  -3    5.42    0.99
   0 -16  -3    5.15    1.12
   0  16   3    4.82    1.06
   0  16   3    4.23    1.12
   0 -16  -3    4.09    0.99
   0 -16  -3    3.43    0.86
   0  16   3    4.69    1.12
   0  16   3    3.04    0.99
   0 -16  -4    8.45    1.12
   0 -16  -4    6.01    1.19
   0  16   4    6.27    1.06
   0  16   4    6.41    1.25
   0 -16  -4    5.88    0.92
   0 -16  -4    9.51    1.25
   0  16   4    6.87    1.19
   0  16   4    9.38    1.19
   0 -16  -5    4.76    0.92
   0 -16  -5    4.76    1.12
   0  16   5    5.55    0.99
   0  16   5    5.35    1.19
   0 -16  -5    3.96    0.86
   0 -16  -5    3.04    1.06
   0  16   5    3.57    0.99
   0  16   5    2.91    1.06
   0 -16  -6   27.61    1.92
   0 -16  -6   27.80    2.05
   0  16   6   30.78    1.98
   0  16   6   27.87    2.18
   0 -16  -6   28.40    1.85
   0 -16  -6   26.35    1.59
   0  16   6   28.53    1.85
   0  16   6   26.42    1.85
   0 -16  -7    0.40    0.73
   0 -16  -7    0.13    0.86
   0  16   7   -0.40    0.73
   0  16   7   -0.40    0.92
   0 -16  -7    0.66    0.86
   0 -16  -7    0.20    0.73
   0  16   7   -0.33    0.99
   0  16   7    0.53    0.86
   0 -16  -8   11.43    1.19
   0 -16  -8    9.58    1.25
   0  16   8   11.56    1.25
   0  16   8    9.97    1.39
   0 -16  -8   10.10    1.32
   0 -16  -8   12.09    1.19
   0  16   8    8.98    1.25
   0  16   8   12.28    1.32
   0 -16  -9    1.85    0.79
   0 -16  -9    2.05    0.92
   0  16   9    1.85    0.86
   0  16   9    1.39    0.99
   0 -16  -9    0.73    0.79
   0 -16  -9    1.12    0.86
   0  16   9    1.52    0.92
   0  16   9    1.59    0.92
   0 -16 -10    6.27    1.06
   0 -16 -10    6.34    1.12
   0  16  10    6.60    1.06
   0  16  10    6.27    1.25
   0 -16 -10    2.97    0.92
   0 -16 -10    5.81    0.99
   0  16  10    6.27    1.12
   0  16  10    7.40    1.12
   0 -16 -11    0.99    0.86
   0 -16 -11    0.53    0.86
   0  16  11   -0.40    0.79
   0  16  11    1.98    1.06
   0 -16 -11    1.45    0.86
   0 -16 -11    0.66    0.79
   0  16  11    0.00    0.92
   0  16  11    1.59    0.86
   0 -16 -12    0.46    0.86
   0 -16 -12    0.79    0.92
   0  16  12    0.33    0.86
   0  16  12    0.99    1.06
   0 -16 -12    2.05    0.79
   0 -16 -12    1.92    0.86
   0  16  12    1.52    0.92
   0  16  12    0.66    0.86
   0 -16 -13    0.40    0.86
   0 -16 -13    0.92    0.99
   0  16  13   -0.79    0.86
   0  16  13    0.73    0.99
   0 -16 -13    1.72    0.79
   0 -16 -13    1.19    0.79
   0  16  13    1.65    0.92
   0  16  13    0.59    0.86
   0 -16 -14    0.13    0.86
   0 -16 -14    0.20    0.99
   0  16  14    0.13    1.12
   0 -16 -14    0.79    0.86
   0 -16 -14    0.73    0.73
   0  16  14    0.40    0.86
   0  16  14    1.78    0.92
   0 -16 -15    1.78    0.99
   0 -16 -15    2.58    0.99
   0  16  15    1.45    0.99
   0  16  15    1.12    1.12
   0 -16 -15   -0.40    0.73
   0 -16 -15    0.20    0.92
   0  16  15    0.59    0.86
   0  16  15   -0.40    0.92
   0 -16 -16    0.73    0.86
   0 -16 -16   -0.59    0.99
   0  16  16   -0.13    0.99
   0  16  16    0.66    1.06
   0 -16 -16    0.26    0.86
   0 -16 -16    0.92    0.92
   0  16  16    0.86    0.92
   0  16  16    0.33    0.92
   0 -16 -17    0.92    0.99
   0 -16 -17   -0.33    0.86
   0  16  17   -0.40    0.99
   0  16  17    0.33    1.06
   0 -16 -18    0.99    0.92
   0 -16 -18    1.98    0.86
   0  16  18   -0.46    1.06
   0  16  18    1.06    1.06
   0 -17   9    1.39    0.99
   0 -17   9    0.53    0.92
   0  17  -9    1.32    0.99
   0  17  -9    0.00    0.53
   0 -17   9   -0.13    0.92
   0 -17   9    1.59    0.92
   0  17  -9    0.86    0.86
   0  17  -9    3.04    1.06
   0 -17   8   10.17    1.59
   0 -17   8   12.09    1.45
   0 -17   8   11.89    1.25
   0 -17   8   10.43    1.32
   0  17  -8   10.57    1.25
   0  17  -8   11.89    1.39
   0 -17   7    2.05    1.12
   0 -17   7    4.23    1.06
   0 -17   7   -0.33    0.79
   0 -17   7    1.39    0.99
   0  17  -7    2.44    0.99
   0  17  -7    1.25    0.92
   0 -17   6   -0.46    0.92
   0 -17   6   -0.79    0.86
   0  17  -6    0.66    0.86
   0  17  -6   -0.59    0.53
   0 -17   6    0.40    0.86
   0 -17   6    0.79    0.79
   0  17  -6   -0.46    0.92
   0  17  -6    1.59    0.86
   0 -17   5    1.72    1.06
   0 -17   5    3.83    0.92
   0  17  -5    2.11    0.99
   0  17  -5   -0.13    0.53
   0 -17   5    2.71    0.92
   0 -17   5    3.76    0.92
   0  17  -5    2.77    0.99
   0  17  -5    3.50    0.99
   0 -17   4   -0.86    0.86
   0 -17   4    0.07    0.79
   0  17  -4    0.00    0.86
   0  17  -4   -0.20    0.53
   0 -17   4    0.53    0.86
   0 -17   4   -0.40    0.73
   0  17  -4    0.13    0.86
   0  17  -4    2.44    0.92
   0 -17   3    9.44    1.39
   0 -17   3    8.98    1.19
   0 -17   3    9.38    1.06
   0 -17   3    8.12    1.25
   0  17  -3    9.38    1.25
   0  17  -3    9.11    1.19
   0 -17   2    3.04    1.19
   0 -17   2    4.69    1.06
   0 -17   2    4.36    1.12
   0 -17   2    3.76    0.86
   0  17  -2    3.24    0.92
   0  17  -2    2.77    1.06
   0 -17   1    0.73    0.99
   0 -17   1    1.12    0.86
   0  17  -1    1.39    0.86
   0  17  -1    0.59    0.79
   0 -17   1    2.18    1.06
   0 -17   1    1.25    0.79
   0  17  -1    1.39    0.99
   0  17  -1    0.79    0.86
   0 -17   0    1.25    0.92
   0 -17   0    1.19    0.86
   0  17   0    1.19    0.86
   0 -17   0    0.26    0.73
   0  17   0    1.72    0.86
   0  17   0    0.99    0.99
   0 -17  -1   11.16    1.25
   0 -17  -1   10.83    1.39
   0  17   1   10.50    1.25
   0  17   1   10.57    1.45
   0 -17  -1   11.36    1.32
   0 -17  -1   10.30    1.12
   0  17   1   11.10    1.25
   0  17   1    9.51    1.39
   0 -17  -2    6.08    1.19
   0 -17  -2    7.07    1.06
   0  17   2    6.01    1.25
   0  17   2    5.42    1.06
   0 -17  -2    5.75    1.12
   0 -17  -2    6.01    0.92
   0  17   2    6.34    1.12
   0 -17  -3   15.45    1.45
   0 -17  -3   15.12    1.59
   0  17   3   13.54    1.39
   0  17   3   15.06    1.65
   0 -17  -3   14.13    1.25
   0 -17  -3   14.93    1.52
   0 -17  -4    0.66    0.86
   0 -17  -4    0.40    0.79
   0  17   4    0.79    0.92
   0  17   4    0.40    0.79
   0 -17  -4    0.33    0.73
   0 -17  -4   -1.25    0.86
   0  17   4    0.07    0.92
   0  17   4   -0.79    0.99
   0 -17  -5    0.26    0.86
   0 -17  -5    0.00    0.79
   0  17   5   -0.07    0.92
   0  17   5   -0.73    0.79
   0 -17  -5    0.46    0.73
   0 -17  -5    2.11    0.92
   0  17   5    1.98    0.92
   0  17   5    0.99    0.92
   0 -17  -6    1.85    0.92
   0 -17  -6    0.40    0.86
   0  17   6    1.25    0.86
   0  17   6    0.53    1.06
   0 -17  -6    0.79    0.79
   0 -17  -6    1.32    0.92
   0 -17  -7    4.95    1.06
   0 -17  -7    6.74    1.12
   0  17   7    6.87    1.25
   0  17   7    5.68    0.99
   0 -17  -7    6.08    0.99
   0 -17  -7    9.77    1.25
   0  17   7    6.14    1.12
   0  17   7    5.88    1.12
   0 -17  -8    2.18    0.92
   0 -17  -8    0.66    0.86
   0  17   8    2.51    0.86
   0  17   8    1.85    0.99
   0 -17  -8    1.78    0.92
   0 -17  -8    1.39    0.86
   0  17   8    2.71    0.99
   0  17   8    2.05    0.99
   0 -17  -9    6.67    1.12
   0 -17  -9    5.61    1.06
   0  17   9    3.50    1.12
   0  17   9    3.83    0.99
   0 -17  -9    3.96    0.92
   0 -17  -9    5.22    1.06
   0  17   9    5.61    1.12
   0  17   9    5.09    1.12
   0 -17 -10    6.80    1.19
   0 -17 -10    5.81    1.12
   0  17  10    7.46    1.12
   0  17  10    5.15    1.25
   0 -17 -10    5.15    0.92
   0 -17 -10    3.10    1.06
   0  17  10    6.93    1.19
   0  17  10    3.63    0.99
   0 -17 -11    3.96    1.06
   0 -17 -11    1.98    0.86
   0  17  11    1.78    1.06
   0  17  11    1.52    0.92
   0 -17 -11    1.92    0.79
   0 -17 -11    3.17    0.92
   0  17  11    2.64    0.99
   0  17  11    3.17    0.92
   0 -17 -12    1.19    0.92
   0 -17 -12    1.98    0.86
   0  17  12   -0.46    0.92
   0  17  12    1.19    0.92
   0 -17 -12    2.38    0.86
   0 -17 -12    0.73    0.66
   0  17  12    2.11    0.92
   0  17  12    0.07    0.86
   0 -17 -13   -0.53    0.86
   0  17  13    0.33    0.99
   0  17  13    0.40    0.86
   0 -17 -13    2.51    0.79
   0 -17 -13   -0.20    0.86
   0  17  13   -0.73    0.86
   0  17  13    0.99    0.86
   0 -17 -14    0.20    0.92
   0 -17 -14    1.72    0.92
   0  17  14    1.78    1.12
   0 -17 -14    0.40    0.79
   0 -17 -14    0.40    0.92
   0  17  14    1.72    0.92
   0  17  14    0.53    0.86
   0 -17 -15    0.53    0.86
   0 -17 -15    0.20    0.99
   0  17  15    1.39    0.99
   0  17  15    1.85    1.19
   0 -17 -16    0.86    0.99
   0 -17 -16    2.18    0.92
   0  17  16    0.26    1.06
   0  17  16    2.64    1.12
   0 -17 -17    1.59    0.99
   0 -17 -17    2.58    0.99
   0  17  17    1.45    1.19
   0  17  17    4.62    1.32
   0 -18   7    0.07    0.99
   0 -18   7   -0.40    0.73
   0  18  -7   -0.73    0.46
   0  18  -7    1.32    1.06
   0 -18   7   -0.66    0.92
   0 -18   7    0.00    0.92
   0  18  -7    0.66    0.92
   0  18  -7    0.13    0.86
   0 -18   6   -1.12    0.92
   0 -18   6    0.86    0.86
   0  18  -6    0.46    0.92
   0  18  -6    0.13    0.59
   0 -18   6    0.86    0.92
   0 -18   6    0.13    0.86
   0  18  -6    0.86    0.92
   0  18  -6    1.45    0.92
   0 -18   5    0.86    1.06
   0 -18   5    1.12    0.92
   0  18  -5    0.13    0.66
   0  18  -5    0.33    0.92
   0 -18   5    0.99    0.92
   0 -18   5    0.59    0.79
   0  18  -5    0.40    0.86
   0  18  -5    0.20    0.86
   0 -18   4    5.48    1.19
   0 -18   4    5.55    1.12
   0 -18   4    4.09    1.06
   0 -18   4    4.09    0.99
   0  18  -4    5.02    1.06
   0  18  -4    4.56    1.12
   0 -18   3    1.72    0.92
   0 -18   3    2.51    0.92
   0  18  -3   -0.53    0.59
   0  18  -3    2.25    0.99
   0 -18   3    2.97    0.99
   0 -18   3    4.09    0.86
   0  18  -3    4.56    0.99
   0  18  -3    1.12    0.92
   0 -18   2    5.55    1.12
   0 -18   2    5.61    1.12
   0 -18   2    4.62    1.06
   0 -18   2    5.35    0.92
   0  18  -2    6.14    1.12
   0  18  -2    6.80    1.19
   0 -18   1   -1.12    1.06
   0  18  -1    0.73    0.73
   0  18  -1   -0.73    0.86
   0 -18   1    0.53    0.92
   0 -18   1   -0.73    0.73
   0  18  -1    1.25    0.86
   0  18  -1    0.26    0.99
   0 -18   0    4.23    1.19
   0 -18   0    4.76    1.06
   0 -18   0    5.94    1.12
   0 -18   0    5.61    0.99
   0  18   0    4.76    0.99
   0  18   0    5.48    1.19
   0 -18  -1   -1.25    0.92
   0 -18  -1   -0.26    0.79
   0  18   1    0.59    0.99
   0  18   1    0.86    0.86
   0 -18  -1    0.92    0.92
   0  18   1    1.78    0.86
   0  18   1    0.86    0.99
   0 -18  -2   -0.99    0.92
   0 -18  -2   -0.86    0.73
   0  18   2    0.07    0.86
   0  18   2    0.26    0.99
   0 -18  -2    1.06    0.79
   0 -18  -2   -0.53    0.79
   0  18   2    1.72    0.86
   0  18   2    0.20    0.99
   0 -18  -3   -0.26    0.92
   0 -18  -3    0.86    0.86
   0  18   3   -0.53    0.92
   0  18   3    0.46    0.86
   0 -18  -3    0.00    0.86
   0 -18  -3    1.12    0.73
   0  18   3    0.73    0.86
   0  18   3   -1.12    1.06
   0 -18  -4    1.85    0.99
   0 -18  -4    2.18    0.92
   0  18   4    1.98    0.92
   0  18   4    0.92    1.06
   0 -18  -4    2.84    0.99
   0 -18  -4    2.84    0.86
   0  18   4    0.46    0.99
   0  18   4    2.18    1.12
   0 -18  -5    1.98    0.92
   0 -18  -5    0.13    0.73
   0  18   5    1.92    0.99
   0  18   5    0.53    0.86
   0 -18  -5   -0.20    0.92
   0 -18  -5    0.20    0.79
   0  18   5   -0.26    0.92
   0  18   5    0.13    0.99
   0 -18  -6    0.79    0.92
   0 -18  -6   -0.79    0.66
   0  18   6    1.32    0.86
   0  18   6    0.13    0.99
   0 -18  -6    0.53    0.92
   0 -18  -6    0.59    0.79
   0  18   6    0.73    0.99
   0  18   6    0.79    0.92
   0 -18  -7    3.04    0.99
   0 -18  -7    1.85    0.79
   0  18   7    1.45    0.99
   0  18   7    2.38    0.86
   0 -18  -7    2.84    0.99
   0 -18  -7    2.58    0.86
   0  18   7    0.92    1.06
   0  18   7    3.76    0.99
   0 -18  -8    1.25    0.92
   0 -18  -8    1.12    0.79
   0  18   8    0.59    0.86
   0  18   8    1.52    1.06
   0 -18  -8   -1.19    0.92
   0 -18  -8    1.25    0.79
   0  18   8    0.13    0.92
   0  18   8    0.26    0.86
   0 -18  -9    5.28    1.12
   0 -18  -9    3.96    0.99
   0  18   9    5.42    1.19
   0  18   9    5.09    1.06
   0 -18  -9    2.71    1.06
   0 -18  -9    4.69    0.92
   0  18   9    3.04    1.06
   0  18   9    5.35    1.06
   0 -18 -10    1.06    0.86
   0 -18 -10   -0.20    0.86
   0  18  10    1.45    0.86
   0  18  10   -0.99    0.99
   0 -18 -10   -0.59    0.86
   0 -18 -10    0.79    0.79
   0  18  10    1.52    0.92
   0  18  10   -0.99    0.86
   0 -18 -11   -1.39    0.86
   0 -18 -11   -0.53    0.79
   0  18  11    0.59    0.99
   0  18  11    0.59    0.86
   0 -18 -11   -0.26    0.86
   0 -18 -11    0.59    0.73
   0  18  11   -0.59    0.92
   0  18  11    0.59    0.92
   0 -18 -12    0.40    0.92
   0 -18 -12    3.24    1.12
   0  18  12    1.78    1.19
   0  18  12    2.25    0.99
   0 -18 -12    0.99    0.99
   0 -18 -12    2.05    0.79
   0  18  12    2.38    0.99
   0  18  12    3.10    1.06
   0 -18 -13    1.98    1.12
   0  18  13    1.12    0.99
   0  18  13    1.52    1.19
   0 -18 -14    1.85    1.06
   0  18  14    1.06    1.12
   0 -19   4    0.46    0.86
   0 -19   4   -0.53    0.86
   0  19  -4    0.46    0.79
   0  19  -4    0.59    0.92
   0 -19   4    0.20    0.92
   0 -19   4   -1.19    0.79
   0  19  -4    0.00    0.86
   0  19  -4    0.26    0.92
   0 -19   3    0.99    0.92
   0 -19   3    1.78    0.86
   0  19  -3    1.06    0.99
   0  19  -3   -0.46    0.73
   0 -19   3    0.13    0.99
   0 -19   3   -0.73    0.79
   0  19  -3    1.45    0.92
   0  19  -3    1.85    0.99
   0 -19   2   -0.33    0.92
   0 -19   2   -1.59    0.79
   0  19  -2    0.40    0.92
   0  19  -2    0.40    0.66
   0 -19   2    1.59    0.99
   0 -19   2    0.73    0.79
   0  19  -2   -0.20    0.86
   0  19  -2   -1.25    0.92
   0 -19   1    1.32    1.06
   0 -19   1    0.59    0.86
   0  19  -1    0.40    0.73
   0  19  -1   -0.13    0.86
   0 -19   1   -0.46    0.92
   0 -19   1    1.25    0.79
   0  19  -1   -1.06    0.86
   0  19  -1    0.59    1.06
   0 -19   0    0.66    1.06
   0 -19   0    2.38    0.99
   0  19   0    3.10    1.06
   0  19   0    0.86    0.79
   0 -19   0    3.10    1.06
   0 -19   0    2.84    0.86
   0  19   0    0.73    0.92
   0  19   0    0.92    1.12
   0 -19  -1    4.82    1.19
   0 -19  -1    3.96    1.06
   0  19   1    1.32    1.06
   0 -19  -1    2.58    1.12
   0 -19  -1    4.23    0.86
   0  19   1    5.48    1.12
   0  19   1    3.50    1.19
   0 -19  -2    0.92    0.86
   0 -19  -2    1.39    1.06
   0  19   2    0.13    0.86
   0  19   2    0.33    1.12
   0 -19  -2    1.12    0.86
   0 -19  -2   -0.99    0.92
   0  19   2   -0.40    0.86
   0  19   2    1.32    1.06
   0 -19  -3    2.44    0.92
   0 -19  -3   -0.13    0.92
   0  19   3    0.07    0.86
   0  19   3   -0.07    1.06
   0 -19  -3    0.46    0.92
   0 -19  -3   -0.26    0.73
   0  19   3    1.98    0.99
   0  19   3    0.20    1.06
   0 -19  -4    2.64    1.06
   0 -19  -4    1.72    0.92
   0  19   4    1.78    1.06
   0  19   4    0.99    0.92
   0 -19  -4    0.40    0.99
   0 -19  -4    2.58    0.79
   0  19   4    1.52    1.06
   0  19   4    1.25    0.99
   0 -19  -5    0.79    0.92
   0 -19  -5    0.92    0.79
   0  19   5   -1.92    0.99
   0  19   5    0.33    0.86
   0 -19  -5   -0.40    0.99
   0 -19  -5    0.26    0.73
   0  19   5    0.73    1.06
   0 -19  -6   -0.26    0.86
   0 -19  -6    0.13    0.86
   0  19   6   -0.07    0.86
   0  19   6   -0.92    0.99
   0 -19  -6   -0.33    0.73
   0 -19  -6   -0.20    0.99
   0  19   6   -1.39    0.92
   0  19   6    0.20    0.92
   0 -19  -7    0.59    0.79
   0 -19  -7    1.19    0.99
   0  19   7   -0.40    0.92
   0  19   7    0.99    1.06
   0 -19  -7    0.07    0.99
   0 -19  -7    0.46    0.79
   0  19   7    0.73    0.92
   0  19   7    0.07    0.92
   0 -19  -8   -0.07    0.99
   0  19   8    0.46    0.99
   0  19   8    0.86    1.06
   0 -19  -8    0.53    0.92
   0 -19  -8    0.92    0.79
   0  19   8    1.19    0.99
   0  19   8    1.32    0.92
   0 -19  -9   -1.25    0.92
   0 -19  -9    0.46    0.79
   0  19   9   -1.72    0.99
   0 -20   0   -0.07    0.99
   0 -20   0   -0.86    0.79
   0  20   0    0.13    0.86
   0  20   0    1.25    1.06
   0 -20  -1   -0.66    0.99
   0 -20  -1    1.06    0.86
   0  20   1    1.72    1.12
   0  20   1    0.00    0.92
   0 -20  -2   -1.32    0.92
   0 -20  -2   -0.59    0.86
   0  20   2   -0.86    0.92
   0 -20  -3   -0.33    0.86
   0  20   3   -0.66    0.99
   0 -20  -4   -0.59    0.79
   0  20   4   -0.73    0.92
  -1  19   7   -0.99    0.92
   1 -19  -7   -0.99    0.79
  -1  19   6    0.40    1.06
   1 -19  -6    0.79    0.99
  -1  19   6    1.65    0.99
  -1  19   6   -0.26    0.92
   1 -19  -6    0.92    0.99
   1 -19  -6   -0.26    0.73
  -1  19   5    1.32    0.99
   1 -19  -5    0.33    0.99
  -1  19   5   -0.59    0.86
  -1  19   5    1.78    0.99
   1 -19  -5   -0.33    0.92
   1 -19  -5    0.00    0.73
  -1  19   4    1.78    1.12
  -1  19   4    2.11    1.06
   1 -19  -4    3.04    0.99
   1 -19  -4    3.43    1.19
  -1  19   4    2.05    1.12
   1 -19  -4    2.18    1.12
   1 -19  -4    2.58    0.79
  -1  19   3   -0.53    0.92
  -1  19   3    0.40    1.06
   1 -19  -3    0.00    1.06
   1 -19  -3    2.38    0.92
  -1  19   3   -0.92    0.86
  -1  19   3   -0.33    1.06
   1 -19  -3   -0.26    0.73
   1 -19  -3    0.66    0.99
  -1  19   2    6.87    1.52
  -1  19   2    8.26    1.32
   1 -19  -2    8.45    1.52
   1 -19  -2    7.86    1.32
  -1  19   2    8.39    1.19
  -1  19   2    5.81    1.39
   1 -19  -2    5.61    1.25
   1 -19  -2    6.80    0.99
  -1  19   1   -0.73    0.86
  -1  19   1   -0.46    0.92
   1 -19  -1    2.51    1.12
   1 -19  -1    0.79    0.92
  -1  19   1    0.59    0.86
  -1  19   1   -0.59    1.06
   1 -19  -1   -1.12    0.79
   1 -19  -1   -0.59    0.92
   1 -19   0    2.64    1.25
  -1  19   0    3.10    0.99
  -1  19   0    3.57    1.19
   1 -19   0    2.31    0.92
   1 -19   0    2.05    1.12
  -1  19  -1    0.53    0.99
  -1  19  -1   -0.73    0.79
   1 -19   1    1.12    1.12
   1 -19   1    2.18    0.92
  -1  19  -1    3.04    0.92
  -1  19  -1    1.59    0.99
   1 -19   1    3.76    1.06
   1 -19   1    2.25    0.86
  -1  19  -2   -0.66    0.92
  -1  19  -2    0.26    0.79
   1 -19   2    0.00    0.79
   1 -19   2    1.52    1.06
  -1  19  -2   -0.13    0.79
  -1  19  -2   -0.07    0.99
   1 -19   2    0.92    0.79
   1 -19   2    0.66    0.99
   1 -19   3    6.87    1.25
   1 -19   3    6.14    1.39
  -1  19  -3    6.27    1.12
  -1  19  -3    6.74    1.25
   1 -19   3    6.08    1.06
   1 -19   3    5.28    1.19
  -1  18  12    0.86    0.99
  -1  18  12   -0.53    1.12
   1 -18 -12    0.66    0.99
  -1  18  11   10.43    1.45
  -1  18  11    9.25    1.52
   1 -18 -11    7.60    1.39
   1 -18 -11    8.92    1.32
  -1  18  11    7.33    1.25
   1 -18 -11    7.46    1.06
  -1  18  10    0.92    0.92
  -1  18  10    0.46    0.92
   1 -18 -10    0.86    0.92
   1 -18 -10    2.18    0.92
  -1  18  10   -0.66    0.92
  -1  18  10   -0.26    0.86
   1 -18 -10    0.07    0.92
   1 -18 -10    1.06    0.79
  -1  18   9    0.92    0.99
  -1  18   9    0.33    0.92
   1 -18  -9    1.85    0.86
   1 -18  -9    0.33    0.86
  -1  18   9    0.40    0.92
  -1  18   9    0.79    0.92
   1 -18  -9   -0.40    0.79
   1 -18  -9    0.20    0.92
  -1  18   8    1.85    0.99
  -1  18   8    1.25    0.99
   1 -18  -8    0.40    0.86
   1 -18  -8    1.06    0.86
  -1  18   8    3.17    0.99
  -1  18   8    1.92    0.92
   1 -18  -8    0.92    0.79
   1 -18  -8   -0.20    0.92
  -1  18   7    2.84    0.99
  -1  18   7    2.11    1.06
   1 -18  -7    1.45    0.99
   1 -18  -7    4.42    1.06
  -1  18   7   -0.46    0.92
  -1  18   7    2.58    1.06
   1 -18  -7    4.89    1.06
   1 -18  -7    2.38    0.79
  -1  18   6    0.46    0.99
  -1  18   6   -0.26    0.86
   1 -18  -6   -0.46    0.79
   1 -18  -6    0.07    0.86
  -1  18   6   -0.20    0.92
  -1  18   6   -0.46    0.92
   1 -18  -6    0.66    0.92
   1 -18  -6    0.33    0.73
  -1  18   5    1.78    0.99
  -1  18   5    1.06    0.92
   1 -18  -5    2.25    0.92
   1 -18  -5    2.31    0.86
  -1  18   5    1.92    0.99
  -1  18   5    0.40    1.06
   1 -18  -5    2.05    0.99
   1 -18  -5    1.19    0.79
  -1  18   4   -0.46    0.86
  -1  18   4    0.92    0.99
   1 -18  -4    0.13    0.86
   1 -18  -4    0.26    0.86
  -1  18   4    0.33    0.86
  -1  18   4   -0.20    1.06
   1 -18  -4   -1.32    0.66
   1 -18  -4   -0.20    0.92
  -1  18   3   -0.26    0.99
  -1  18   3    0.66    0.92
   1 -18  -3    0.66    0.79
   1 -18  -3    2.64    0.99
  -1  18   3    1.72    0.92
  -1  18   3    0.73    1.06
   1 -18  -3    1.12    0.86
   1 -18  -3    0.26    0.73
  -1  18   2    3.10    1.06
  -1  18   2    2.44    0.99
   1 -18  -2    3.43    1.06
   1 -18  -2    1.06    0.92
  -1  18   2    0.53    0.92
  -1  18   2    1.25    1.19
   1 -18  -2    1.45    0.92
   1 -18  -2    3.04    0.86
  -1  18   1   -0.86    1.06
  -1  18   1   -0.33    0.86
   1 -18  -1    0.20    0.86
   1 -18  -1    0.40    0.92
  -1  18   1    0.07    0.86
  -1  18   1   -0.40    0.99
   1 -18  -1   -1.39    0.73
   1 -18  -1   -0.46    0.86
  -1  18   0   -0.40    0.66
  -1  18   0    1.32    0.92
   1 -18   0    1.39    0.86
   1 -18   0    0.99    0.92
  -1  18   0    1.32    0.86
  -1  18   0    0.86    0.99
   1 -18   0    0.40    0.92
  -1  18  -1    0.07    0.86
  -1  18  -1   -0.66    0.66
   1 -18   1    0.66    0.86
  -1  18  -1    0.40    0.99
  -1  18  -1    1.25    0.86
   1 -18   1   -0.13    0.99
   1 -18   1    1.59    0.79
   1 -18   2    4.82    1.12
   1 -18   2    5.28    1.25
  -1  18  -2    4.42    1.06
  -1  18  -2    4.69    1.12
   1 -18   2    4.76    0.92
   1 -18   2    4.16    1.06
  -1  18  -3    0.33    0.73
  -1  18  -3    0.73    0.92
   1 -18   3    1.06    1.12
   1 -18   3    1.32    0.92
  -1  18  -3   -0.66    0.92
  -1  18  -3   -0.33    0.86
   1 -18   3    0.86    0.79
   1 -18   3   -0.20    0.92
   1 -18   4    5.09    1.12
   1 -18   4    6.27    1.39
  -1  18  -4    4.62    1.06
  -1  18  -4    4.23    1.12
   1 -18   4    5.22    1.12
   1 -18   4    5.88    0.99
  -1  18  -5    0.00    0.66
  -1  18  -5    0.00    0.92
   1 -18   5   -0.86    0.92
   1 -18   5    0.59    0.86
  -1  18  -5    1.25    0.86
  -1  18  -5   -0.13    0.86
   1 -18   5    0.07    0.92
   1 -18   5   -1.06    0.79
  -1  18  -6   -1.12    6.01
  -1  18  -6    4.49    1.25
   1 -18   6    3.30    1.12
   1 -18   6    4.69    1.12
  -1  18  -6    6.54    1.19
  -1  18  -6    8.59    1.25
   1 -18   6    4.62    1.19
   1 -18   6    4.89    1.12
  -1  17  16    6.34    1.32
  -1  17  16    5.68    1.32
   1 -17 -16    3.90    1.06
   1 -17 -16    6.08    1.32
  -1  17  15    0.92    1.06
  -1  17  15    1.19    0.99
   1 -17 -15   -0.79    0.92
   1 -17 -15    0.20    0.99
  -1  17  14    0.79    1.12
  -1  17  14    0.99    1.12
   1 -17 -14    1.19    0.99
   1 -17 -14    2.31    1.06
  -1  17  14    2.51    0.92
   1 -17 -14    1.52    0.79
  -1  17  13    1.98    1.06
  -1  17  13    1.92    0.99
   1 -17 -13    1.45    0.99
  -1  17  13    1.39    0.99
  -1  17  13    2.58    0.92
   1 -17 -13    0.99    0.73
   1 -17 -13    0.53    0.99
  -1  17  12    1.52    0.99
  -1  17  12   -0.53    0.99
   1 -17 -12    0.40    0.92
   1 -17 -12    0.66    0.92
  -1  17  12    0.99    0.92
  -1  17  12    0.59    0.99
   1 -17 -12    0.86    0.92
   1 -17 -12    2.25    0.79
  -1  17  11    1.52    0.99
  -1  17  11    1.39    0.92
   1 -17 -11    1.32    0.92
   1 -17 -11   -0.20    0.86
  -1  17  11    0.92    0.86
  -1  17  11    1.39    0.92
   1 -17 -11    0.99    0.73
   1 -17 -11    0.99    0.92
  -1  17  10    0.33    0.86
  -1  17  10    0.99    0.99
   1 -17 -10    1.12    0.86
   1 -17 -10    1.19    0.86
  -1  17  10    0.53    0.92
  -1  17  10   -0.20    0.86
   1 -17 -10    1.45    0.86
   1 -17 -10    0.40    0.73
  -1  17   9    1.85    0.92
  -1  17   9    0.07    0.92
   1 -17  -9    1.65    0.86
   1 -17  -9    1.59    0.92
  -1  17   9    1.39    0.92
  -1  17   9    0.92    0.86
   1 -17  -9    2.31    0.99
   1 -17  -9    1.06    0.79
  -1  17   8    8.06    1.32
  -1  17   8    5.75    1.06
   1 -17  -8    9.05    1.25
   1 -17  -8    7.40    1.19
  -1  17   8    5.48    1.12
  -1  17   8    8.59    1.19
   1 -17  -8    5.94    1.12
   1 -17  -8    8.72    1.06
  -1  17   7    5.28    1.12
  -1  17   7    3.96    0.92
   1 -17  -7    5.22    1.06
   1 -17  -7    3.50    0.92
  -1  17   7    2.05    0.99
  -1  17   7    4.09    1.06
   1 -17  -7    2.38    0.99
   1 -17  -7    2.84    0.86
  -1  17   6    7.20    1.25
  -1  17   6    8.26    1.19
   1 -17  -6    7.73    1.12
   1 -17  -6    7.79    1.19
  -1  17   6    6.87    1.19
  -1  17   6    8.26    1.32
   1 -17  -6    6.41    1.19
   1 -17  -6    7.53    1.06
  -1  17   5    4.49    1.12
  -1  17   5    6.87    1.06
   1 -17  -5    4.95    1.06
   1 -17  -5    6.14    1.06
  -1  17   5    4.76    1.19
  -1  17   5    5.42    1.06
   1 -17  -5    5.88    0.92
   1 -17  -5    5.09    1.06
  -1  17   4   -0.07    0.79
  -1  17   4    0.99    0.92
   1 -17  -4    0.46    0.79
   1 -17  -4    1.12    0.86
  -1  17   4    0.00    0.99
  -1  17   4   -1.59    0.79
   1 -17  -4    0.66    0.73
   1 -17  -4    0.07    0.92
  -1  17   3   -0.13    0.92
  -1  17   3   -0.66    0.79
   1 -17  -3    0.53    0.79
   1 -17  -3   -0.53    0.86
  -1  17   3   -0.26    0.99
  -1  17   3    0.53    0.86
   1 -17  -3   -0.20    0.92
   1 -17  -3    0.59    0.73
  -1  17   2   -0.20    0.99
  -1  17   2   -0.26    0.86
   1 -17  -2    0.26    0.79
   1 -17  -2    0.07    0.92
  -1  17   2    0.13    0.99
  -1  17   2    0.53    0.86
   1 -17  -2    0.00    0.92
   1 -17  -2   -0.79    0.66
  -1  17   1    4.69    0.99
  -1  17   1    3.04    1.12
   1 -17  -1    3.70    1.06
   1 -17  -1    3.30    0.92
  -1  17   1    1.78    1.19
  -1  17   1    3.24    0.92
   1 -17  -1    2.18    0.79
   1 -17  -1    4.36    1.06
  -1  17   0    1.06    0.73
   1 -17   0    0.33    0.92
   1 -17   0   -0.13    0.79
  -1  17   0    0.86    0.99
  -1  17   0    0.20    0.86
   1 -17   0    1.12    0.92
   1 -17   0    0.20    0.73
   1 -17   1    5.55    1.19
   1 -17   1    6.93    1.19
  -1  17  -1    2.44    1.12
  -1  17  -1    3.96    0.92
   1 -17   1    3.57    0.99
   1 -17   1    0.26    1.19
  -1  17  -2   -0.40    0.79
  -1  17  -2   -0.20    0.66
   1 -17   2    1.06    1.06
   1 -17   2    0.86    0.92
  -1  17  -2    0.07    0.86
  -1  17  -2   -0.92    0.79
   1 -17   2    0.92    0.73
   1 -17   2   -0.46    0.92
  -1  17  -3   -0.07    0.59
  -1  17  -3   -0.20    0.79
   1 -17   3    1.19    0.86
   1 -17   3   -0.59    0.99
  -1  17  -3    1.06    0.86
  -1  17  -3   -0.40    0.86
   1 -17   3    0.73    0.86
   1 -17   3   -1.59    0.73
  -1  17  -4    0.79    0.59
  -1  17  -4    0.73    0.92
   1 -17   4    0.26    0.86
   1 -17   4    0.99    0.99
  -1  17  -4    0.53    0.92
  -1  17  -4   -0.26    0.86
   1 -17   4    0.33    0.73
   1 -17   4    2.11    0.92
  -1  17  -5    0.92    0.73
  -1  17  -5    1.52    0.86
   1 -17   5   -0.79    0.79
   1 -17   5    0.46    0.99
  -1  17  -5   -0.73    0.92
  -1  17  -5    1.65    0.92
   1 -17   5    0.20    0.73
   1 -17   5   -0.07    0.86
  -1  17  -6   -0.66    0.53
  -1  17  -6   -0.20    0.92
   1 -17   6   -0.20    0.86
   1 -17   6    1.45    0.92
  -1  17  -6   -0.07    0.92
  -1  17  -6    0.79    0.86
   1 -17   6    0.40    0.86
   1 -17   6    0.99    0.73
   1 -17   7    3.96    1.06
   1 -17   7    2.64    1.19
  -1  17  -7    4.62    1.06
  -1  17  -7    3.83    0.99
   1 -17   7    3.70    0.92
   1 -17   7    5.68    1.12
  -1  17  -8    2.11    1.06
  -1  17  -8    0.20    0.53
   1 -17   8    1.85    0.99
   1 -17   8   -0.92    0.86
  -1  17  -8    0.20    0.86
  -1  17  -8   -1.19    0.86
   1 -17   8    0.92    0.86
   1 -17   8    0.99    0.99
  -1  17  -9   -0.53    0.53
  -1  17  -9    1.12    0.99
   1 -17   9    2.58    0.99
   1 -17   9    0.73    0.86
  -1  17  -9   -0.33    0.92
  -1  17  -9    0.66    0.92
   1 -17   9    2.05    0.99
   1 -17   9    2.71    0.92
  -1  16  18    1.52    1.19
  -1  16  18    0.20    1.12
   1 -16 -18    1.19    0.92
   1 -16 -18    1.32    0.99
  -1  16  17   -0.13    1.06
  -1  16  17   -0.07    1.19
   1 -16 -17    1.39    1.06
   1 -16 -17    0.13    0.86
  -1  16  16   11.43    1.59
  -1  16  16   10.37    1.45
   1 -16 -16    9.51    1.52
   1 -16 -16    7.40    1.32
  -1  16  16    8.45    1.25
  -1  16  16    5.09    1.32
   1 -16 -16    9.44    1.25
  -1  16  15    2.44    0.99
  -1  16  15   -0.66    1.06
   1 -16 -15    0.13    0.92
   1 -16 -15    1.65    0.92
  -1  16  15    0.33    0.92
  -1  16  15   -0.33    0.92
   1 -16 -15    0.92    0.79
   1 -16 -15    1.19    0.92
  -1  16  14    1.78    1.12
   1 -16 -14    0.66    0.99
   1 -16 -14    1.92    0.92
  -1  16  14    1.52    0.86
  -1  16  14    0.13    0.92
  -1  16  13    0.33    0.99
  -1  16  13    0.59    0.92
   1 -16 -13    1.06    0.92
   1 -16 -13    0.46    0.92
  -1  16  13    0.86    0.86
  -1  16  13    1.45    0.92
   1 -16 -13   -0.07    0.73
   1 -16 -13    0.92    0.79
  -1  16  12   -0.13    0.86
  -1  16  12   -1.65    0.92
   1 -16 -12   -1.12    0.79
   1 -16 -12    0.26    0.86
  -1  16  12   -1.45    0.86
  -1  16  12   -1.25    0.86
   1 -16 -12   -0.73    0.73
   1 -16 -12    0.40    0.86
  -1  16  11    3.50    1.06
  -1  16  11    4.29    0.99
   1 -16 -11    1.92    0.92
   1 -16 -11    3.04    0.92
  -1  16  11    1.98    0.92
  -1  16  11    2.84    0.99
   1 -16 -11    4.36    0.99
   1 -16 -11    3.50    0.86
  -1  16  10   -0.40    0.79
  -1  16  10    0.20    0.92
   1 -16 -10    0.20    0.79
   1 -16 -10   -0.07    0.79
  -1  16  10   -0.40    0.86
  -1  16  10   -0.46    0.79
   1 -16 -10    0.07    0.86
   1 -16 -10    0.26    0.79
  -1  16   9    0.33    0.86
  -1  16   9    0.46    0.79
   1 -16  -9    0.13    0.73
   1 -16  -9   -0.99    0.73
  -1  16   9   -0.40    0.86
  -1  16   9   -0.46    0.92
   1 -16  -9   -0.20    0.79
   1 -16  -9   -0.26    0.73
  -1  16   8    0.40    0.92
  -1  16   8    0.59    0.79
   1 -16  -8    0.26    0.79
   1 -16  -8    0.53    0.79
  -1  16   8   -0.46    0.86
  -1  16   8    0.00    0.86
   1 -16  -8    1.06    0.73
   1 -16  -8    0.73    0.86
  -1  16   7    5.15    1.06
  -1  16   7    4.36    1.06
   1 -16  -7    3.83    0.99
   1 -16  -7    3.37    0.92
  -1  16   7    4.42    1.06
  -1  16   7    6.67    1.12
   1 -16  -7    6.01    0.92
   1 -16  -7    6.41    1.12
  -1  16   6   13.47    1.52
  -1  16   6   13.94    1.45
   1 -16  -6   13.01    1.39
   1 -16  -6   15.12    1.39
  -1  16   6   17.70    1.52
  -1  16   6   14.27    1.45
   1 -16  -6   12.68    1.19
   1 -16  -6   15.19    1.45
  -1  16   5   -1.39    0.73
  -1  16   5   -0.40    0.92
   1 -16  -5    0.26    0.73
   1 -16  -5    0.13    0.79
  -1  16   5   -0.40    0.86
  -1  16   5    0.13    0.86
   1 -16  -5    1.06    0.73
   1 -16  -5   -0.26    0.86
  -1  16   4   12.02    1.25
  -1  16   4   14.27    1.52
   1 -16  -4   10.96    1.32
   1 -16  -4   11.16    1.25
  -1  16   4   14.86    1.39
  -1  16   4   15.78    1.52
   1 -16  -4   10.96    1.32
   1 -16  -4   14.27    1.19
  -1  16   3    2.97    1.06
  -1  16   3    0.33    0.79
   1 -16  -3    0.79    0.86
   1 -16  -3    1.92    0.79
  -1  16   3    1.19    0.99
  -1  16   3    0.33    0.86
   1 -16  -3    1.39    0.92
   1 -16  -3    1.25    0.73
  -1  16   2   17.24    1.52
  -1  16   2   15.12    1.65
   1 -16  -2   16.91    1.52
   1 -16  -2   18.16    1.65
  -1  16   2   15.06    1.59
  -1  16   2   17.17    1.45
   1 -16  -2   15.45    1.45
   1 -16  -2   13.67    1.19
  -1  16   1    0.86    0.86
  -1  16   1    0.86    0.99
   1 -16  -1    1.52    0.92
   1 -16  -1    0.99    0.79
  -1  16   1    0.26    0.86
  -1  16   1   -0.40    0.99
   1 -16  -1    0.13    0.92
   1 -16  -1    1.25    0.73
  -1  16   0    0.53    0.86
  -1  16   0    2.38    0.92
   1 -16   0    1.65    0.79
   1 -16   0    2.31    0.99
  -1  16   0    0.92    0.92
   1 -16   0    3.37    0.79
   1 -16   0    3.50    0.99
  -1  16  -1    1.98    0.92
  -1  16  -1   -0.33    0.59
   1 -16   1    1.72    0.92
   1 -16   1    0.33    0.79
  -1  16  -1    0.92    0.86
  -1  16  -1    0.53    0.99
   1 -16   1    0.92    0.92
   1 -16   1    1.85    0.73
   1 -16   2    7.46    1.39
  -1  16  -2    7.26    1.19
  -1  16  -2    7.93    1.12
   1 -16   2    5.68    0.99
  -1  16  -3    0.99    0.79
  -1  16  -3   -0.40    0.53
   1 -16   3    0.86    0.99
   1 -16   3    0.92    0.86
  -1  16  -3    0.26    0.92
  -1  16  -3    1.39    0.86
   1 -16   3    2.11    0.92
   1 -16   3    0.33    0.73
  -1  16  -4    3.90    0.99
  -1  16  -4    4.95    0.99
   1 -16   4    5.68    1.19
   1 -16   4    3.76    0.99
  -1  16  -4    4.69    0.99
  -1  16  -4    3.57    1.06
   1 -16   4    3.37    0.86
   1 -16   4    3.63    1.06
  -1  16  -5    0.73    0.79
  -1  16  -5    0.00    0.59
   1 -16   5    1.12    0.79
   1 -16   5   -0.26    0.99
  -1  16  -5    1.25    0.92
  -1  16  -5    0.13    0.86
   1 -16   5    0.46    0.92
   1 -16   5    0.20    0.79
  -1  16  -6    0.20    0.59
  -1  16  -6    1.59    0.86
   1 -16   6    1.78    0.86
   1 -16   6    1.32    1.12
  -1  16  -6    0.13    0.92
  -1  16  -6    2.31    0.92
   1 -16   6    2.51    0.92
   1 -16   6    2.71    0.86
  -1  16  -7    0.20    0.53
  -1  16  -7    2.25    0.92
   1 -16   7    0.59    0.79
   1 -16   7    0.86    0.92
  -1  16  -7    0.79    0.92
  -1  16  -7    0.46    0.99
   1 -16   7    0.20    0.79
   1 -16   7    0.92    0.79
   1 -16   8    5.22    1.12
   1 -16   8    3.17    1.12
  -1  16  -8    2.77    0.99
  -1  16  -8    4.29    1.12
   1 -16   8    4.03    0.92
   1 -16   8    3.70    1.06
   1 -16   9    4.89    1.19
   1 -16   9    2.58    1.19
  -1  16  -9    3.04    0.99
  -1  16  -9    4.36    1.06
   1 -16   9    5.02    0.99
   1 -16   9    5.02    1.12
  -1  16 -10    0.00    0.86
   1 -16  10    1.85    1.06
   1 -16  10    0.00    0.86
  -1  16 -10   -0.20    0.79
  -1  16 -10   -0.33    0.92
   1 -16  10   -1.06    0.86
   1 -16  10    1.78    0.92
  -1  16 -11    2.84    1.06
   1 -16  11    2.77    1.25
  -1  16 -11    3.70    1.06
  -1  16 -11    3.04    1.06
   1 -16  11    4.36    1.06
   1 -16  11    4.16    0.99
  -1  15  19    3.24    1.12
  -1  15  19    1.98    1.19
   1 -15 -19    0.66    0.73
   1 -15 -19    1.92    0.99
  -1  15  18    2.77    1.19
  -1  15  18    2.38    1.06
   1 -15 -18    1.92    0.92
   1 -15 -18    1.85    1.06
  -1  15  18    0.33    0.99
   1 -15 -18    0.00    0.86
  -1  15  17   -1.45    1.06
  -1  15  17    1.19    0.99
   1 -15 -17    0.20    0.92
   1 -15 -17    0.99    0.99
  -1  15  17   -0.07    0.92
  -1  15  17   -0.07    0.92
   1 -15 -17    0.59    0.86
   1 -15 -17    0.59    0.86
  -1  15  16   -0.86    1.06
  -1  15  16    0.40    0.99
   1 -15 -16   -0.26    0.86
   1 -15 -16    0.00    0.92
  -1  15  16   -0.40    0.86
  -1  15  16   -1.19    0.92
   1 -15 -16   -1.12    0.86
   1 -15 -16    0.79    0.79
  -1  15  15    0.00    1.06
  -1  15  15    1.65    0.99
   1 -15 -15   -0.59    0.86
   1 -15 -15    0.73    0.92
  -1  15  15   -0.07    0.86
  -1  15  15    0.26    0.86
   1 -15 -15    0.59    0.73
   1 -15 -15   -0.73    0.79
  -1  15  14   -0.59    0.99
   1 -15 -14    0.07    0.92
   1 -15 -14   -0.20    0.79
  -1  15  14    0.66    0.86
  -1  15  14   -1.65    0.86
   1 -15 -14   -0.20    0.73
   1 -15 -14   -0.40    0.79
  -1  15  13    0.46    0.99
  -1  15  13    0.07    0.86
   1 -15 -13    0.66    0.86
   1 -15 -13   -0.26    0.86
  -1  15  13    0.73    0.86
  -1  15  13    0.33    0.79
   1 -15 -13   -0.86    0.66
   1 -15 -13   -0.53    0.79
  -1  15  12    1.59    0.99
  -1  15  12   -0.46    0.79
   1 -15 -12   -0.07    0.79
   1 -15 -12   -0.13    0.86
  -1  15  12    0.53    0.86
  -1  15  12    0.07    0.86
   1 -15 -12    0.26    0.79
   1 -15 -12   -1.45    0.79
  -1  15  11    7.26    1.25
  -1  15  11    7.33    1.19
   1 -15 -11    6.80    1.12
   1 -15 -11    8.19    1.19
  -1  15  11    6.60    1.12
  -1  15  11    7.46    1.19
   1 -15 -11    5.48    0.99
   1 -15 -11    6.93    1.06
  -1  15  10   19.15    1.72
  -1  15  10   18.43    1.59
   1 -15 -10   18.56    1.59
   1 -15 -10   19.68    1.65
  -1  15  10   17.63    1.59
  -1  15  10   16.25    1.52
   1 -15 -10   17.24    1.52
   1 -15 -10   18.76    1.39
  -1  15   9    1.52    0.99
  -1  15   9    1.06    0.86
   1 -15  -9    3.10    0.86
   1 -15  -9    2.77    0.92
  -1  15   9    1.92    0.92
  -1  15   9    3.30    0.99
   1 -15  -9    2.25    0.86
   1 -15  -9    1.85    0.92
  -1  15   8   -0.13    0.86
  -1  15   8   -0.59    0.73
   1 -15  -8   -0.20    0.73
   1 -15  -8   -0.53    0.79
  -1  15   8   -1.45    0.86
  -1  15   8    1.52    0.86
   1 -15  -8    0.13    0.86
   1 -15  -8    1.39    0.79
  -1  15   7    1.12    0.99
  -1  15   7    0.20    0.73
   1 -15  -7    0.73    0.73
   1 -15  -7    0.46    0.86
  -1  15   7    0.86    0.99
  -1  15   7    0.53    0.86
   1 -15  -7    1.32    0.86
   1 -15  -7    0.33    0.79
  -1  15   6   13.87    1.52
  -1  15   6   13.80    1.32
   1 -15  -6   15.39    1.32
   1 -15  -6   10.96    1.39
  -1  15   6    9.84    1.32
  -1  15   6   14.07    1.39
   1 -15  -6   14.13    1.32
   1 -15  -6   14.53    1.39
  -1  15   5    0.00    0.99
  -1  15   5   -0.46    0.73
   1 -15  -5   -0.07    0.73
   1 -15  -5   -0.40    0.86
  -1  15   5    0.73    0.92
   1 -15  -5   -1.12    0.92
  -1  15   4   16.38    1.45
   1 -15  -4   16.11    1.45
  -1  15   3   -1.39    0.79
   1 -15  -3   -0.13    0.86
  -1  15   2   24.63    1.78
   1 -15  -2   25.76    1.72
  -1  15   1    4.76    0.99
   1 -15  -1    2.51    0.86
  -1  15   0   -0.86    0.79
   1 -15   0    0.07    0.66
   1 -15   1    1.12    1.12
  -1  15  -1   -0.53    0.92
   1 -15   1    1.32    0.73
  -1  15  -2   -0.33    0.59
   1 -15   2    1.78    1.12
  -1  15  -2    1.72    0.92
   1 -15   2    3.30    0.79
  -1  15  -3    0.66    0.59
   1 -15   3   -0.20    0.79
  -1  15  -3   -0.13    0.86
  -1  15  -4    0.20    0.53
  -1  15  -4    1.98    0.99
   1 -15   4    2.05    0.86
   1 -15   4    2.58    1.06
  -1  15  -5   -0.33    0.53
  -1  15  -5   -0.13    0.92
   1 -15   5   -0.40    0.79
   1 -15   5    0.46    0.99
  -1  15  -6    0.33    0.53
  -1  15  -6    1.19    0.86
   1 -15   6    1.78    1.06
   1 -15   6    1.25    0.86
  -1  15  -6    0.92    0.92
   1 -15   6    1.45    0.99
  -1  15  -7    0.46    0.53
  -1  15  -7    1.59    0.86
   1 -15   7    1.78    0.86
   1 -15   7   -0.66    0.99
  -1  15  -7    0.13    0.86
  -1  15  -7    0.66    0.92
   1 -15   7   -0.53    0.92
   1 -15   7    1.12    0.73
   1 -15   8   11.82    1.39
   1 -15   8    8.06    1.32
  -1  15  -8   11.16    1.32
  -1  15  -8    7.46    1.25
   1 -15   8   10.04    1.12
   1 -15   8   10.77    1.32
   1 -15   9    3.76    1.06
   1 -15   9    2.31    1.06
  -1  15  -9    4.03    0.99
  -1  15  -9    3.90    1.06
   1 -15   9    5.09    1.06
   1 -15   9    2.25    0.79
  -1  15 -10    0.59    0.59
  -1  15 -10    1.65    0.92
   1 -15  10    0.20    0.92
   1 -15  10    2.51    1.12
  -1  15 -10    0.73    0.92
  -1  15 -10    1.25    0.86
   1 -15  10    1.78    0.79
   1 -15  10   -0.26    0.92
  -1  15 -11    0.20    0.92
  -1  15 -11   -0.20    0.59
   1 -15  11    1.25    0.92
   1 -15  11    1.12    0.99
  -1  15 -11    0.46    0.86
  -1  15 -11   -0.20    0.99
   1 -15  11    0.46    0.86
   1 -15  11    0.59    0.86
  -1  15 -12    2.51    1.06
  -1  15 -12    0.46    0.53
   1 -15  12    3.04    0.99
   1 -15  12    1.98    0.99
  -1  15 -12    1.45    1.06
  -1  15 -12    2.58    0.99
   1 -15  12    2.05    0.92
   1 -15  12    2.38    0.92
  -1  14  20    0.13    1.12
  -1  14  20    0.40    1.12
   1 -14 -20    1.78    0.92
   1 -14 -20    0.99    0.59
  -1  14  19    0.40    1.12
  -1  14  19    0.26    1.12
   1 -14 -19   -0.33    0.66
   1 -14 -19   -0.26    0.99
  -1  14  19   -0.13    0.99
  -1  14  19   -1.12    0.99
   1 -14 -19    1.85    0.92
   1 -14 -19   -0.07    0.86
  -1  14  18    4.09    1.12
  -1  14  18    2.51    1.19
   1 -14 -18    2.71    1.06
   1 -14 -18    0.20    0.66
  -1  14  18    3.83    1.12
  -1  14  18    3.43    1.12
   1 -14 -18    3.10    0.99
   1 -14 -18    3.83    0.99
  -1  14  17    0.99    0.92
  -1  14  17   -0.07    1.06
   1 -14 -17    0.86    0.92
   1 -14 -17   -0.40    0.73
  -1  14  17    1.92    1.06
  -1  14  17    0.26    0.86
   1 -14 -17   -0.59    0.86
   1 -14 -17    1.52    0.92
  -1  14  16    0.00    0.99
  -1  14  16    0.79    0.92
   1 -14 -16    0.73    0.86
   1 -14 -16    0.13    0.92
  -1  14  16   -0.99    0.86
  -1  14  16   -0.53    0.86
   1 -14 -16   -1.12    0.79
   1 -14 -16    0.26    0.86
  -1  14  15    4.82    1.12
  -1  14  15    5.42    1.32
   1 -14 -15    5.22    1.06
   1 -14 -15    5.09    1.06
  -1  14  15    5.88    1.06
  -1  14  15    4.76    0.99
   1 -14 -15    4.36    0.92
   1 -14 -15    4.23    0.99
  -1  14  14    0.07    1.06
   1 -14 -14    0.20    0.86
   1 -14 -14    0.53    0.79
  -1  14  14    0.26    0.86
  -1  14  14   -0.33    0.86
   1 -14 -14    0.86    0.73
   1 -14 -14   -0.79    0.79
  -1  14  13    4.82    1.12
  -1  14  13    5.88    1.12
   1 -14 -13    4.16    0.99
   1 -14 -13    4.36    0.99
  -1  14  13    4.36    0.99
  -1  14  13    3.43    0.99
   1 -14 -13    4.95    0.86
   1 -14 -13    3.24    0.99
  -1  14  12    1.32    1.06
  -1  14  12    0.66    0.86
   1 -14 -12    0.00    0.86
   1 -14 -12    1.52    0.92
  -1  14  12    0.20    0.92
  -1  14  12    1.12    0.92
   1 -14 -12    1.98    0.79
   1 -14 -12    0.00    0.86
  -1  14  11    4.62    1.06
   1 -14 -11    4.36    0.92
  -1  14  11    5.94    0.99
  -1  14  11    4.09    1.06
   1 -14 -11    4.76    0.99
   1 -14 -11    3.76    0.86
  -1  14  10    1.32    0.86
  -1  14  10    1.72    0.99
   1 -14 -10    1.25    0.79
   1 -14 -10    0.59    0.86
  -1  14   9    6.93    1.25
   1 -14  -9    6.27    1.25
  -1  14   8    0.13    0.92
   1 -14  -8   -0.59    0.86
  -1  14   7   16.64    1.52
  -1  14   7   20.61    1.78
   1 -14  -7   19.55    1.59
   1 -14  -7   17.11    1.52
  -1  14   7   20.54    1.59
  -1  14   7   19.35    1.59
   1 -14  -7   21.13    1.59
   1 -14  -7   22.98    1.45
  -1  14   6    1.78    0.79
  -1  14   6    3.24    0.99
   1 -14  -6    1.92    0.73
   1 -14  -6    0.99    0.79
  -1  14   6    2.11    0.92
  -1  14   6    1.72    0.92
   1 -14  -6    1.32    0.86
   1 -14  -6    1.52    0.79
  -1  14   5   12.09    1.25
  -1  14   5    9.58    1.32
   1 -14  -5   11.62    1.25
   1 -14  -5   10.63    1.19
  -1  14   5   11.29    1.25
  -1  14   5   12.55    1.32
   1 -14  -5   12.68    1.12
   1 -14  -5   10.90    1.19
  -1  14   4    5.55    0.99
  -1  14   4    7.07    1.19
   1 -14  -4    7.73    1.12
   1 -14  -4    8.19    1.06
  -1  14   4    7.46    1.12
  -1  14   4    8.12    1.12
   1 -14  -4    7.00    1.12
   1 -14  -4    7.40    0.99
  -1  14   3   -1.06    0.73
  -1  14   3   -0.73    0.92
   1 -14  -3    0.99    0.79
   1 -14  -3   -0.13    0.66
  -1  14   3   -0.59    0.79
  -1  14   3   -2.05    0.79
   1 -14  -3    0.99    0.73
   1 -14  -3   -0.07    0.79
  -1  14   2    1.25    0.79
  -1  14   2   -0.13    0.86
   1 -14  -2    0.13    0.79
   1 -14  -2    1.12    0.73
  -1  14   2    0.53    0.86
  -1  14   2    0.86    0.86
   1 -14  -2   -0.99    0.66
   1 -14  -2    0.46    0.86
  -1  14   1   12.61    1.25
  -1  14   1   14.40    1.52
   1 -14  -1   13.14    1.39
   1 -14  -1   13.94    1.32
  -1  14   1   14.46    1.45
  -1  14   1   16.51    1.39
   1 -14  -1   14.53    1.19
   1 -14  -1   15.39    1.39
  -1  14   0   -1.06    0.86
  -1  14   0   -1.59    0.73
   1 -14   0    0.79    0.86
   1 -14   0   -0.40    0.73
  -1  14   0    0.99    0.86
  -1  14   0    0.53    0.79
   1 -14   0    0.46    0.73
   1 -14   0   -0.66    0.79
   1 -14   1   11.82    1.25
   1 -14   1   14.00    1.45
  -1  14  -1   12.68    1.32
  -1  14  -1   13.08    1.32
   1 -14   1   12.68    1.12
   1 -14   1   16.11    1.45
  -1  14  -2    4.42    0.86
  -1  14  -2    5.75    1.12
   1 -14   2    6.27    0.92
   1 -14   2    6.67    1.12
  -1  14  -2    4.89    1.19
   1 -14   2    7.73    1.19
   1 -14   2    6.47    0.92
  -1  14  -3    0.20    0.53
  -1  14  -3    0.46    0.79
   1 -14   3    1.19    0.73
   1 -14   3    1.12    0.92
  -1  14  -3    0.79    0.86
  -1  14  -3   -0.33    0.79
   1 -14   3    0.73    0.86
   1 -14   3   -0.13    0.73
   1 -14   4    4.76    0.92
   1 -14   4    6.14    1.19
  -1  14  -4    4.89    0.92
  -1  14  -4    4.36    0.99
   1 -14   4    5.22    0.92
   1 -14   4    4.95    1.12
  -1  14  -5   -0.07    0.53
  -1  14  -5    0.99    0.86
   1 -14   5    1.32    0.79
   1 -14   5    2.18    0.99
  -1  14  -5    2.31    0.86
  -1  14  -5    0.40    0.79
   1 -14   5    0.40    0.86
   1 -14   5    0.40    0.73
  -1  14  -6    0.26    0.86
  -1  14  -6    0.40    0.53
   1 -14   6   -0.53    0.79
   1 -14   6   -0.07    0.92
  -1  14  -6    0.46    0.79
  -1  14  -6    0.33    0.92
   1 -14   6    0.53    0.92
   1 -14   6    0.40    0.73
  -1  14  -7    0.20    0.53
  -1  14  -7    2.71    0.99
   1 -14   7    3.30    0.92
   1 -14   7    2.25    1.06
  -1  14  -7    3.96    0.99
  -1  14  -7    2.38    0.92
   1 -14   7    2.64    0.86
   1 -14   7    2.38    0.99
  -1  14  -8    1.32    0.86
  -1  14  -8   -0.40    0.53
   1 -14   8    1.39    0.86
   1 -14   8    1.25    1.06
  -1  14  -8    1.85    0.92
   1 -14   8    1.12    0.79
   1 -14   8    0.40    0.99
  -1  14  -9    0.26    0.53
  -1  14  -9    1.45    0.92
   1 -14   9    2.25    0.92
   1 -14   9    1.12    0.86
  -1  14 -10   -0.46    0.59
  -1  14 -10   -0.33    0.79
   1 -14  10    0.66    0.79
   1 -14  10    0.46    0.99
  -1  14 -10   -0.46    0.92
   1 -14  10   -0.40    0.79
   1 -14  10    0.53    0.86
   1 -14  11    3.24    0.99
   1 -14  11    2.64    1.12
  -1  14 -11    2.51    0.99
  -1  14 -11    1.85    0.92
   1 -14  11    2.18    1.12
   1 -14  11    2.18    0.79
  -1  14 -12    0.00    0.86
  -1  14 -12    0.33    0.59
   1 -14  12    0.92    0.92
   1 -14  12    0.66    0.99
  -1  14 -12    1.72    0.99
  -1  14 -12    1.92    0.92
   1 -14  12    0.86    0.79
   1 -14  12    2.77    0.99
  -1  14 -13   -0.73    0.86
  -1  14 -13    0.86    0.59
   1 -14  13   -0.53    0.92
   1 -14  13    0.07    0.86
  -1  14 -13   -0.53    0.99
  -1  14 -13   -0.26    0.86
   1 -14  13    0.07    0.79
   1 -14  13    0.92    0.86
   1 -14  14   -0.59    0.79
   1 -14  14   -0.26    0.86
  -1  14 -14   -1.45    0.92
  -1  14 -14    0.53    0.92
   1 -14  14    0.33    0.86
   1 -14  14    0.13    0.79
  -1  13  21    6.41    1.39
  -1  13  21    8.26    1.52
  -1  13  20    0.20    0.99
  -1  13  20   -2.05    1.06
   1 -13 -20    0.00    0.59
   1 -13 -20   -0.26    0.92
  -1  13  20   -0.66    1.06
   1 -13 -20   -1.12    0.86
   1 -13 -20    0.33    0.86
  -1  13  19    2.58    1.25
  -1  13  19    5.15    1.25
   1 -13 -19    1.32    0.73
   1 -13 -19    3.17    1.06
  -1  13  19    6.80    1.12
  -1  13  19    3.83    1.12
   1 -13 -19    3.70    0.99
   1 -13 -19    1.85    0.99
  -1  13  18    4.36    1.32
  -1  13  18    6.27    1.19
  -1  13  18    4.42    1.06
  -1  13  18    3.96    1.12
   1 -13 -18    3.90    1.06
   1 -13 -18    4.23    1.19
  -1  13  17    8.19    1.19
  -1  13  17    9.97    1.59
  -1  13  17    7.33    1.19
  -1  13  17    8.65    1.19
   1 -13 -17    7.99    1.06
   1 -13 -17    6.74    1.12
  -1  13  16    2.51    1.12
  -1  13  16    5.94    1.06
  -1  13  16    5.48    1.12
   1 -13 -16    4.09    0.99
   1 -13 -16    5.42    0.92
  -1  13  15    7.66    1.19
  -1  13  15    4.56    1.06
   1 -13 -15    4.56    0.99
   1 -13 -15    6.80    0.99
   1 -13 -14    4.16    1.12
  -1  13  14    2.91    0.99
  -1  13  14    4.23    0.99
   1 -13 -14    5.28    1.06
   1 -13 -14    2.97    0.86
  -1  13  13    1.06    0.92
  -1  13  13    4.03    1.19
   1 -13 -13    5.35    1.06
   1 -13 -13    2.58    1.06
  -1  13  13    3.17    0.99
  -1  13  13    4.76    1.06
   1 -13 -13    2.31    0.79
   1 -13 -13    3.37    0.92
  -1  13  12    6.54    1.25
  -1  13  12    5.35    1.06
   1 -13 -12    5.48    1.06
   1 -13 -12    4.82    1.06
  -1  13  12    6.54    1.06
   1 -13 -12    5.88    1.06
  -1  13  11   12.02    1.25
  -1  13  11   11.03    1.45
   1 -13 -11    7.40    1.12
   1 -13 -11   11.16    1.25
  -1  13  10   40.09    2.51
  -1  13  10   43.19    2.44
   1 -13 -10   38.97    2.25
   1 -13 -10   39.69    2.31
  -1  13  10   43.13    2.25
  -1  13  10   44.12    2.25
   1 -13 -10   42.07    1.98
   1 -13 -10   42.47    2.18
  -1  13   9   15.06    1.39
  -1  13   9   14.66    1.52
   1 -13  -9   13.80    1.32
   1 -13  -9   14.13    1.32
  -1  13   9   14.73    1.39
  -1  13   9   15.32    1.39
   1 -13  -9   14.79    1.39
   1 -13  -9   15.06    1.25
  -1  13   8    1.59    0.92
  -1  13   8    3.04    0.86
   1 -13  -8    0.40    0.73
   1 -13  -8    1.52    0.79
  -1  13   8    2.84    0.99
  -1  13   8    2.77    0.92
   1 -13  -8    2.44    0.86
   1 -13  -8    1.32    0.86
  -1  13   7    2.51    0.79
  -1  13   7    0.66    0.86
   1 -13  -7   -0.59    0.79
   1 -13  -7    0.59    0.73
  -1  13   7    1.19    0.92
  -1  13   7    0.66    0.86
   1 -13  -7   -0.59    0.73
   1 -13  -7    1.39    0.86
  -1  13   6   28.80    1.98
  -1  13   6   29.79    1.85
   1 -13  -6   27.80    1.85
   1 -13  -6   26.95    1.78
  -1  13   6   28.27    1.78
  -1  13   6   28.93    1.78
   1 -13  -6   29.19    1.65
   1 -13  -6   29.52    1.78
  -1  13   5    5.61    0.92
  -1  13   5    3.76    1.06
   1 -13  -5    4.89    0.86
   1 -13  -5    5.28    0.92
  -1  13   5    3.83    0.99
  -1  13   5    4.36    0.99
   1 -13  -5    7.53    0.92
   1 -13  -5    5.48    0.99
  -1  13   4    9.71    1.12
  -1  13   4   12.48    1.39
   1 -13  -4   10.77    1.19
   1 -13  -4   11.82    1.12
  -1  13   4   11.10    1.25
  -1  13   4   10.30    1.19
   1 -13  -4    9.84    1.19
   1 -13  -4    9.97    1.06
  -1  13   3    0.66    0.92
  -1  13   3    0.40    0.73
   1 -13  -3    0.66    0.79
   1 -13  -3    1.59    0.73
  -1  13   3    0.86    0.79
  -1  13   3   -0.73    0.86
   1 -13  -3   -0.26    0.66
   1 -13  -3   -0.07    0.79
  -1  13   2    5.55    0.92
  -1  13   2    5.61    1.12
   1 -13  -2    5.81    0.92
   1 -13  -2    6.93    1.06
  -1  13   2    4.56    0.99
  -1  13   2    7.07    1.06
   1 -13  -2    6.60    1.06
   1 -13  -2    4.49    0.86
  -1  13   1   14.33    1.25
  -1  13   1   14.86    1.52
   1 -13  -1   13.94    1.32
   1 -13  -1   12.75    1.19
  -1  13   1   15.59    1.39
  -1  13   1   15.19    1.32
   1 -13  -1   14.07    1.19
   1 -13  -1   13.94    1.32
  -1  13   0    4.09    0.99
  -1  13   0    4.76    0.86
   1 -13   0    6.34    0.92
   1 -13   0    5.15    0.99
  -1  13   0    6.21    1.06
  -1  13   0    5.61    0.99
   1 -13   0    6.14    0.92
   1 -13   0    6.27    0.99
  -1  13  -1   39.23    2.25
  -1  13  -1   41.94    2.44
   1 -13   1   40.42    2.38
   1 -13   1   38.31    2.18
  -1  13  -1   42.27    2.11
  -1  13  -1   40.09    2.05
   1 -13   1   40.55    2.11
   1 -13   1   45.31    2.05
  -1  13  -2    1.52    0.79
  -1  13  -2    1.45    0.79
   1 -13   2   -0.20    0.86
   1 -13   2    0.33    0.66
  -1  13  -2    0.33    0.79
  -1  13  -2   -0.79    0.86
   1 -13   2    1.19    0.86
   1 -13   2    1.25    0.79
  -1  13  -3    0.53    0.73
  -1  13  -3   -0.20    0.53
   1 -13   3    0.59    0.73
   1 -13   3    1.39    0.92
  -1  13  -3   -0.73    0.99
   1 -13   3   -1.12    0.73
   1 -13   3   -0.20    0.79
   1 -13   4    5.88    1.25
  -1  13  -4    8.72    1.06
  -1  13  -4    6.41    1.06
   1 -13   4    7.40    0.92
   1 -13   4    7.73    1.06
   1 -13   5   46.69    2.77
   1 -13   5   48.67    2.58
  -1  13  -5   44.45    2.18
  -1  13  -5   44.18    2.11
   1 -13   6    3.43    0.86
   1 -13   6    4.62    1.12
  -1  13  -6    2.58    0.86
  -1  13  -6    3.17    0.92
   1 -13   6    2.11    0.86
   1 -13   6    2.18    0.79
   1 -13   7   46.49    2.77
   1 -13   7   47.29    2.51
  -1  13  -7   43.06    2.11
  -1  13  -7   44.32    2.18
   1 -13   7   44.18    2.25
   1 -13   7   46.23    2.05
   1 -13   8   11.95    1.52
   1 -13   8   13.80    1.32
  -1  13  -8   14.60    1.32
  -1  13  -8   15.39    1.39
   1 -13   8   15.12    1.45
   1 -13   8   13.87    1.19
  -1  13  -9   -0.40    0.92
  -1  13  -9   -0.33    0.53
   1 -13   9    0.20    0.86
   1 -13   9    0.13    0.92
  -1  13  -9   -0.46    0.79
  -1  13  -9   -0.59    0.86
   1 -13   9    0.73    0.86
   1 -13   9   -0.33    0.73
  -1  13 -10    1.25    0.86
  -1  13 -10    0.26    0.53
   1 -13  10    2.51    0.99
   1 -13  10    1.19    0.79
  -1  13 -10    4.62    0.99
  -1  13 -10    2.71    0.99
   1 -13  10    2.38    0.79
   1 -13  10    1.59    0.92
  -1  13 -11    0.13    0.59
  -1  13 -11    2.38    0.92
   1 -13  11    3.10    0.92
   1 -13  11    3.30    1.06
  -1  13 -11    2.64    0.99
   1 -13  11    4.62    0.86
   1 -13  11    1.72    0.99
  -1  13 -12   -0.20    0.59
  -1  13 -12    2.31    0.99
   1 -13  12    3.10    0.92
   1 -13  12    3.50    1.06
   1 -13  13    4.29    1.12
   1 -13  13    2.84    0.99
  -1  13 -13    2.84    0.99
  -1  13 -13    2.38    0.99
   1 -13  13    4.69    1.12
   1 -13  13    3.43    0.86
  -1  13 -14    0.33    0.59
  -1  13 -14   -0.73    0.86
   1 -13  14    0.73    0.79
   1 -13  14    0.26    0.86
  -1  13 -14    1.52    0.99
  -1  13 -14    0.26    0.86
   1 -13  14    1.12    0.92
   1 -13  14    0.59    0.79
   1 -13  15   -1.32    0.66
   1 -13  15    0.66    0.86
  -1  13 -15   -0.26    0.99
  -1  13 -15   -0.26    0.99
   1 -13  15    1.85    0.86
   1 -13  15   -1.19    0.92
  -1  12  22    0.00    1.12
  -1  12  22    0.86    1.12
   1 -12 -22    0.13    0.53
  -1  12  22    0.26    1.06
   1 -12 -22    1.78    0.92
   1 -12 -21   -0.59    0.53
  -1  12  21   -0.33    0.99
  -1  12  21    0.53    0.92
   1 -12 -21    2.51    0.99
   1 -12 -21    0.40    0.92
  -1  12  20    4.16    1.06
   1 -12 -20    4.36    1.06
   1 -12 -20    3.37    1.06
   1 -12 -19    0.00    0.99
  -1  12  19    0.26    0.92
  -1  12  19   -0.92    0.92
   1 -12 -19    2.38    0.92
   1 -12 -19    0.40    0.86
  -1  12  18    5.35    1.19
  -1  12  18    5.02    1.32
   1 -12 -18    5.35    1.19
  -1  12  18    5.15    1.12
  -1  12  18    6.60    1.06
   1 -12 -18    4.69    1.06
  -1  12  17    1.25    1.06
  -1  12  17    0.92    0.86
   1 -12 -17   -0.07    0.59
   1 -12 -17   -0.59    0.86
   1 -12 -17   -0.40    0.86
   1 -12 -17    0.20    0.86
  -1  12  16   11.23    1.39
  -1  12  16    9.58    1.39
  -1  12  16    9.51    1.25
  -1  12  16   12.48    1.32
   1 -12 -16   13.54    1.32
   1 -12 -16   11.82    1.19
  -1  12  15   29.59    2.18
  -1  12  15   32.63    2.11
  -1  12  15   34.41    1.98
  -1  12  15   34.41    1.98
   1 -12 -15   34.21    1.85
   1 -12 -15   31.90    1.85
  -1  12  14   11.36    1.25
  -1  12  14    9.51    1.45
  -1  12  14    9.58    1.19
   1 -12 -14   10.70    1.25
  -1  12  13    0.66    0.86
  -1  12  13    0.99    0.99
   1 -12 -13   -0.33    0.79
   1 -12 -13    1.78    0.79
  -1  12  13    1.92    1.06
   1 -12 -13    1.85    0.86
  -1  12  12   -0.26    0.86
  -1  12  12   -0.46    0.79
   1 -12 -12    0.59    0.79
  -1  12  12    1.12    0.86
  -1  12  12   -0.59    0.86
   1 -12 -12    1.52    0.86
   1 -12 -12   -1.06    0.79
  -1  12  11   20.01    1.52
  -1  12  11   20.80    1.72
   1 -12 -11   18.49    1.52
   1 -12 -11   21.27    1.65
  -1  12  11   22.39    1.59
  -1  12  11   21.07    1.59
   1 -12 -11   21.79    1.52
   1 -12 -11   20.01    1.45
  -1  12  10    7.53    1.06
  -1  12  10    8.72    1.25
   1 -12 -10    8.52    1.12
   1 -12 -10    8.19    1.06
  -1  12  10    6.74    1.19
  -1  12  10    7.86    1.12
   1 -12 -10    6.60    0.99
   1 -12 -10    7.93    1.12
  -1  12   9   66.77    3.24
  -1  12   9   74.83    3.70
   1 -12  -9   71.19    3.43
   1 -12  -9   70.01    3.37
  -1  12   9   74.96    2.97
  -1  12   9   69.21    2.84
   1 -12  -9   72.71    2.71
   1 -12  -9   76.28    2.97
  -1  12   8    6.27    0.92
  -1  12   8    5.55    1.06
   1 -12  -8    4.76    0.92
   1 -12  -8    5.81    0.92
  -1  12   8    5.42    1.12
  -1  12   8    6.27    0.99
   1 -12  -8    7.00    1.06
   1 -12  -8    6.01    0.92
  -1  12   7   23.91    1.78
  -1  12   7   20.67    1.45
   1 -12  -7   24.57    1.65
   1 -12  -7   25.23    1.65
  -1  12   7   25.29    1.65
  -1  12   7   24.70    1.72
   1 -12  -7   27.14    1.52
   1 -12  -7   28.73    1.72
  -1  12   6   22.39    1.52
  -1  12   6   22.26    1.72
   1 -12  -6   23.91    1.65
   1 -12  -6   22.65    1.59
  -1  12   6   23.71    1.59
  -1  12   6   23.58    1.59
   1 -12  -6   24.50    1.45
   1 -12  -6   26.68    1.65
  -1  12   5    7.46    0.99
  -1  12   5    8.32    1.19
   1 -12  -5    9.51    1.06
   1 -12  -5   10.63    1.12
  -1  12   5    9.31    1.19
  -1  12   5   10.70    1.19
   1 -12  -5   11.49    1.19
   1 -12  -5   13.67    1.12
  -1  12   4   63.47    3.04
  -1  12   4   64.85    3.30
   1 -12  -4   65.12    3.17
   1 -12  -4   67.76    3.24
  -1  12   4   68.69    2.71
  -1  12   4   64.33    2.64
   1 -12  -4   62.74    2.58
   1 -12  -4   65.98    2.51
  -1  12   3   14.73    1.25
  -1  12   3   14.66    1.45
   1 -12  -3   13.27    1.25
   1 -12  -3   15.59    1.32
  -1  12   3   12.09    1.25
  -1  12   3   14.46    1.25
   1 -12  -3   14.40    1.19
   1 -12  -3   13.21    1.25
  -1  12   2    0.07    0.66
  -1  12   2   -0.53    0.79
   1 -12  -2   -0.46    0.73
   1 -12  -2   -1.25    0.66
  -1  12   2    0.92    0.86
  -1  12   2    0.07    0.73
   1 -12  -2   -0.92    0.79
   1 -12  -2    0.66    0.66
  -1  12   1   28.13    1.78
  -1  12   1   29.85    2.05
   1 -12  -1   30.51    1.85
   1 -12  -1   27.34    1.85
  -1  12   1   29.46    1.72
  -1  12   1   29.46    1.78
   1 -12  -1   32.23    1.65
   1 -12  -1   30.97    1.72
  -1  12   0   29.52    1.98
  -1  12   0   25.16    1.72
   1 -12   0   28.20    1.78
   1 -12   0   29.06    1.92
  -1  12   0   25.82    1.59
  -1  12   0   29.98    1.78
   1 -12   0   28.27    1.65
   1 -12   0   28.66    1.59
  -1  12  -1    7.60    1.06
  -1  12  -1    8.65    1.06
   1 -12   1    7.13    1.06
   1 -12   1    8.26    0.99
  -1  12  -1    7.20    0.99
  -1  12  -1    6.80    1.06
   1 -12   1    7.20    0.99
   1 -12   1    9.11    0.99
   1 -12   2   51.78    2.71
   1 -12   2   51.05    2.58
  -1  12  -2   50.52    2.31
  -1  12  -2   55.08    2.31
   1 -12   2   53.76    2.38
   1 -12   2   55.34    2.25
  -1  12  -3    0.26    0.53
   1 -12   3    3.70    0.92
   1 -12   3    0.92    0.73
   1 -12   3    1.98    0.86
   1 -12   3    1.85    0.79
   1 -12   4   11.10    1.32
   1 -12   4   11.16    1.12
  -1  12  -4   12.09    1.45
   1 -12   4   13.27    1.12
   1 -12   4   12.94    1.25
  -1  12  -5    0.46    0.73
  -1  12  -5   -0.13    0.46
   1 -12   5    1.19    0.92
   1 -12   5    0.79    0.66
  -1  12  -5   -0.26    0.86
  -1  12  -5    0.26    0.73
   1 -12   5    0.73    0.73
   1 -12   5   -0.13    0.79
   1 -12   6    3.90    0.86
   1 -12   6    3.76    1.06
  -1  12  -6    3.17    0.92
  -1  12  -6    4.36    0.92
   1 -12   6    2.44    0.92
   1 -12   6    2.91    0.86
  -1  12  -7    1.25    0.79
  -1  12  -7    0.59    0.46
   1 -12   7    1.78    0.99
   1 -12   7    2.05    0.79
  -1  12  -7    1.52    0.79
  -1  12  -7    2.84    0.92
   1 -12   7    2.11    0.86
   1 -12   7    1.98    0.79
   1 -12   8   17.24    1.39
   1 -12   8   17.30    1.65
  -1  12  -8   19.95    1.52
  -1  12  -8   17.90    1.32
   1 -12   8   17.96    1.32
   1 -12   8   15.45    1.39
   1 -12   9   17.11    1.45
   1 -12   9   17.70    1.65
  -1  12  -9   16.11    1.39
  -1  12  -9   15.32    1.25
   1 -12   9   15.65    1.32
   1 -12   9   16.71    1.25
   1 -12  10   11.36    1.19
   1 -12  10   12.28    1.39
  -1  12 -10   12.42    1.19
  -1  12 -10   12.15    1.32
   1 -12  10   14.07    1.32
   1 -12  10   11.29    1.12
  -1  12 -11    0.53    0.79
  -1  12 -11   -0.86    0.53
   1 -12  11   -0.46    0.73
   1 -12  11    0.33    0.86
  -1  12 -11    0.59    0.86
  -1  12 -11    0.07    0.92
   1 -12  11    0.53    0.92
   1 -12  11   -0.40    0.79
  -1  12 -12   -0.26    0.53
  -1  12 -12    0.26    0.86
   1 -12  12    0.20    0.86
   1 -12  12   -0.59    0.79
  -1  12 -12    0.26    0.86
  -1  12 -12   -1.12    0.86
   1 -12  12    0.13    0.79
   1 -12  12    0.26    0.92
   1 -12  13   18.82    1.65
   1 -12  13   25.56    2.05
  -1  12 -13   19.55    1.59
  -1  12 -13   23.71    1.65
   1 -12  14    7.33    1.32
   1 -12  14    9.05    1.12
   1 -12  15    4.16    0.86
   1 -12  15    2.64    1.06
  -1  12 -15    4.95    1.12
  -1  12 -15    3.50    1.06
   1 -12  15    3.90    1.06
   1 -12  15    3.17    0.92
  -1  12 -16    0.79    0.99
  -1  12 -16    2.05    1.06
   1 -12  16    1.39    0.99
   1 -12  16    1.98    0.86
  -1  11  22    0.99    1.06
  -1  11  22   -1.25    0.99
   1 -11 -22   -0.26    0.40
   1 -11 -22    0.46    0.86
  -1  11  22   -0.40    0.99
  -1  11  22   -0.26    0.99
   1 -11 -22    0.40    0.92
   1 -11 -22    0.00    0.92
  -1  11  21    1.85    1.25
  -1  11  21    1.32    1.12
  -1  11  21    2.58    1.06
  -1  11  21    3.57    1.06
   1 -11 -21    2.38    0.99
   1 -11 -21    2.64    0.99
  -1  11  20    1.19    1.12
  -1  11  20   -0.07    1.12
   1 -11 -20    0.40    0.86
   1 -11 -20    0.00    0.46
  -1  11  20    0.20    0.92
  -1  11  20    1.85    1.06
   1 -11 -20    1.25    0.92
   1 -11 -20    1.78    0.99
  -1  11  19    1.78    0.99
  -1  11  19    0.07    1.06
   1 -11 -19    1.25    0.92
   1 -11 -19    0.46    0.53
  -1  11  19   -0.86    0.92
  -1  11  19    2.25    1.06
   1 -11 -19   -1.32    0.92
   1 -11 -19    0.86    0.86
  -1  11  18    4.09    1.19
  -1  11  18    6.87    1.32
  -1  11  18    6.34    1.19
  -1  11  18    6.21    1.12
   1 -11 -18    5.15    1.12
   1 -11 -18    6.01    1.12
  -1  11  17    2.91    0.99
  -1  11  17    4.29    1.06
  -1  11  17    5.35    1.06
  -1  11  17    2.77    0.99
   1 -11 -17    3.70    0.99
   1 -11 -17    4.09    0.99
  -1  11  16    1.45    0.99
  -1  11  16    0.33    0.86
   1 -11 -16    1.65    0.92
   1 -11 -16   -0.26    0.59
  -1  11  16    1.45    0.92
  -1  11  16    1.85    0.92
   1 -11 -16   -0.13    0.86
   1 -11 -16   -0.20    0.79
  -1  11  15   23.25    1.92
  -1  11  15   22.32    1.72
  -1  11  14   35.93    2.38
  -1  11  14   29.59    1.98
  -1  11  14   32.03    1.92
  -1  11  14   32.56    1.92
   1 -11 -14   30.91    1.78
   1 -11 -14   29.59    1.72
  -1  11  13    1.65    0.99
  -1  11  13    1.72    0.86
   1 -11 -13    0.79    0.59
   1 -11 -13    3.37    0.86
  -1  11  13    1.52    0.86
  -1  11  13    3.30    0.99
   1 -11 -13    2.18    0.92
   1 -11 -13    3.50    0.86
  -1  11  12   19.81    1.65
  -1  11  12   19.22    1.52
   1 -11 -12   16.91    1.52
  -1  11  12   18.10    1.45
  -1  11  12   18.95    1.45
   1 -11 -12   19.75    1.39
   1 -11 -12   20.28    1.45
  -1  11  11   22.45    1.78
  -1  11  11   26.68    1.78
   1 -11 -11   25.16    1.72
   1 -11 -11   25.43    1.72
  -1  11  11   27.08    1.72
  -1  11  11   28.33    1.72
   1 -11 -11   30.18    1.78
   1 -11 -11   28.99    1.65
  -1  11  10   30.71    1.85
  -1  11  10   32.76    2.11
   1 -11 -10   31.11    1.92
   1 -11 -10   30.64    1.92
  -1  11  10   34.94    1.92
  -1  11  10   34.21    1.85
   1 -11 -10   30.64    1.78
   1 -11 -10   30.12    1.65
  -1  11   9   31.37    1.85
  -1  11   9   31.30    2.05
   1 -11  -9   34.28    1.98
   1 -11  -9   32.43    1.92
  -1  11   9   39.10    1.98
  -1  11   9   36.39    1.92
   1 -11  -9   36.26    1.92
   1 -11  -9   36.13    1.78
  -1  11   8    5.88    0.86
  -1  11   8    5.15    0.99
   1 -11  -8    4.89    0.86
   1 -11  -8    6.14    0.99
  -1  11   8    7.13    0.99
  -1  11   8    4.89    1.06
   1 -11  -8    5.94    0.92
   1 -11  -8    7.53    1.06
  -1  11   7   -0.53    0.79
  -1  11   7   -0.79    0.66
   1 -11  -7    0.13    0.66
   1 -11  -7    0.13    0.73
  -1  11   7    0.99    0.79
  -1  11   7    1.25    0.92
   1 -11  -7   -0.92    0.73
   1 -11  -7   -0.92    0.79
  -1  11   6   56.67    2.91
  -1  11   6   57.39    2.84
   1 -11  -6   59.51    2.91
   1 -11  -6   57.19    2.77
  -1  11   6   55.94    2.38
  -1  11   6   55.08    2.38
   1 -11  -6   56.34    2.25
   1 -11  -6   55.81    2.38
  -1  11   5    0.86    0.73
  -1  11   5    0.59    0.79
   1 -11  -5   -0.07    0.66
   1 -11  -5    0.13    0.73
  -1  11   5   -0.46    0.73
  -1  11   5   -0.13    0.86
   1 -11  -5    0.33    0.73
   1 -11  -5    0.33    0.73
  -1  11   4  129.12    5.42
  -1  11   4  124.95    5.35
   1 -11  -4  134.60    5.61
   1 -11  -4  131.03    5.55
  -1  11   4  123.17    4.03
  -1  11   4  120.40    3.90
   1 -11  -4  124.69    3.90
   1 -11  -4  127.13    4.03
  -1  11   3  112.87    4.95
  -1  11   3  121.39    5.15
   1 -11  -3  120.13    5.09
   1 -11  -3  125.61    5.35
  -1  11   3  117.23    3.83
  -1  11   3  118.02    3.83
   1 -11  -3  123.77    3.96
   1 -11  -3  120.27    3.76
  -1  11   2    3.17    0.92
  -1  11   2    5.28    0.92
   1 -11  -2    4.82    0.86
   1 -11  -2    4.76    0.92
  -1  11   2    3.57    0.92
  -1  11   2    2.25    0.79
   1 -11  -2    0.99    0.73
   1 -11  -2    2.05    0.86
  -1  11   1  187.70    7.60
  -1  11   1  182.41    7.53
   1 -11  -1  186.11    7.53
   1 -11  -1  188.88    7.73
  -1  11   1  177.19    5.28
  -1  11   1  176.07    5.22
   1 -11  -1  178.32    5.28
   1 -11  -1  183.14    5.28
  -1  11   0   18.76    1.52
  -1  11   0   18.03    1.32
   1 -11   0   19.75    1.45
   1 -11   0   18.56    1.45
  -1  11   0   18.49    1.39
  -1  11   0   15.85    1.25
   1 -11   0   20.61    1.32
   1 -11   0   17.57    1.32
  -1  11  -1   89.62    4.09
  -1  11  -1   84.21    3.76
   1 -11   1   85.53    3.83
   1 -11   1   84.21    3.83
  -1  11  -1   84.67    2.91
  -1  11  -1   91.40    3.17
   1 -11   1   79.58    2.91
   1 -11   1   85.39    2.91
  -1  11  -2    0.00    0.66
  -1  11  -2    0.07    0.66
   1 -11   2    1.25    0.66
   1 -11   2    0.53    0.73
  -1  11  -2   -1.12    0.79
  -1  11  -2    0.46    0.73
   1 -11   2    0.13    0.73
   1 -11   2   -0.46    0.79
   1 -11   3   22.19    1.52
   1 -11   3   21.53    1.59
  -1  11  -3   25.03    1.59
  -1  11  -3   22.26    1.39
   1 -11   3   20.67    1.45
   1 -11   3   24.24    1.39
  -1  11  -4    0.46    0.53
  -1  11  -4    0.73    0.66
   1 -11   4    1.65    0.66
   1 -11   4    1.25    0.79
  -1  11  -4    1.78    0.73
  -1  11  -4    0.99    0.86
   1 -11   4    0.59    0.66
   1 -11   4    1.32    0.79
  -1  11  -5  144.44    4.62
   1 -11   5  161.34    4.76
   1 -11   5  147.48    4.62
   1 -11   6   16.58    1.32
   1 -11   6   19.22    1.59
  -1  11  -6   16.78    1.25
  -1  11  -6   18.49    1.39
   1 -11   6   17.63    1.19
   1 -11   6   17.04    1.32
   1 -11   7    5.81    0.92
   1 -11   7    9.31    1.19
  -1  11  -7    5.48    0.92
  -1  11  -7    6.80    1.06
   1 -11   7    6.21    1.06
   1 -11   7    7.00    0.92
   1 -11   8   24.17    1.59
   1 -11   8   23.91    1.78
  -1  11  -8   27.74    1.65
  -1  11  -8   25.69    1.45
   1 -11   8   22.98    1.59
   1 -11   8   24.57    1.45
   1 -11   9    6.74    1.19
   1 -11   9    7.07    0.99
  -1  11  -9    4.82    0.86
  -1  11  -9    8.19    1.12
   1 -11   9    4.23    0.92
   1 -11   9    6.41    0.92
   1 -11  10   40.42    2.25
   1 -11  10   39.63    2.38
  -1  11 -10   43.59    1.92
  -1  11 -10   44.71    2.18
   1 -11  10   46.10    1.98
   1 -11  10   42.99    2.05
   1 -11  11   17.44    1.39
   1 -11  11   15.32    1.52
  -1  11 -11   19.61    1.52
  -1  11 -11   19.75    1.39
   1 -11  11   21.73    1.52
   1 -11  11   17.83    1.32
   1 -11  12   48.28    2.58
   1 -11  12   49.07    2.77
  -1  11 -12   48.81    2.18
  -1  11 -12   45.77    2.25
  -1  11 -13   -0.66    0.79
  -1  11 -13   -0.07    0.79
   1 -11  13    0.13    0.79
   1 -11  13    0.07    0.86
  -1  11 -13    0.07    0.86
  -1  11 -13    1.78    0.99
   1 -11  13    2.11    0.79
   1 -11  13    0.33    0.86
  -1  11 -14   19.68    1.45
  -1  11 -14   16.31    1.45
   1 -11  14   18.16    1.39
   1 -11  14   18.95    1.52
  -1  11 -15    1.85    0.86
  -1  11 -15    2.91    0.79
   1 -11  15    1.65    0.79
   1 -11  15    3.70    0.99
  -1  11 -15    3.10    0.99
   1 -11  15    1.45    0.86
   1 -11  15    1.65    1.06
   1 -11  16   17.96    1.39
  -1  11 -16   19.68    1.59
  -1  11 -17    0.07    0.99
  -1  11 -17    0.07    0.99
   1 -11  17    1.25    0.79
   1 -11  17   -1.12    0.92
  -1  10  23    0.92    1.12
  -1  10  23    0.66    0.99
  -1  10  23    1.59    1.06
  -1  10  23    0.46    0.99
   1 -10 -23    1.19    0.99
   1 -10 -23   -0.33    0.92
  -1  10  22    2.31    1.12
  -1  10  22    0.13    1.12
   1 -10 -22   -0.40    0.26
   1 -10 -22    1.59    0.92
  -1  10  22    1.12    1.06
  -1  10  22    1.85    0.99
   1 -10 -22    1.92    0.99
   1 -10 -22    1.72    1.06
  -1  10  21    0.33    1.12
  -1  10  21    1.06    1.06
   1 -10 -21    0.59    0.99
   1 -10 -21   -0.26    0.33
  -1  10  21    0.73    0.99
  -1  10  21   -0.07    0.86
   1 -10 -21    0.46    0.92
   1 -10 -21    0.86    0.92
  -1  10  20   12.88    1.59
  -1  10  20   12.61    1.59
   1 -10 -20   12.02    1.45
   1 -10 -20    0.13    9.18
  -1  10  20   11.95    1.39
  -1  10  20   13.01    1.52
   1 -10 -20   13.87    1.39
   1 -10 -20   12.75    1.45
  -1  10  19   20.28    1.92
  -1  10  19   18.16    1.78
  -1  10  19   18.10    1.78
   1 -10 -19   20.67    1.65
   1 -10 -19   20.21    1.52
  -1  10  18    5.35    1.12
  -1  10  18    8.65    1.32
  -1  10  18    6.74    1.19
  -1  10  18    5.94    1.06
   1 -10 -18    6.80    1.12
   1 -10 -18    7.86    1.12
  -1  10  17    0.07    0.99
  -1  10  17    1.12    0.86
   1 -10 -17   -0.20    0.53
   1 -10 -17    0.53    0.86
  -1  10  17    0.59    0.86
   1 -10 -17   -0.53    0.99
  -1  10  16    0.07    0.92
  -1  10  16   -0.26    0.79
   1 -10 -16    1.19    0.86
   1 -10 -16   -0.46    0.53
  -1  10  16    0.33    0.92
  -1  10  16   -1.19    0.92
   1 -10 -16    1.19    0.79
  -1  10  15    3.70    1.06
  -1  10  15    3.30    0.92
   1 -10 -15    0.33    0.53
   1 -10 -15    3.10    0.92
  -1  10  15    2.84    0.99
  -1  10  15    2.31    0.92
   1 -10 -15    3.43    0.99
   1 -10 -15    3.50    0.92
  -1  10  14   49.33    2.71
  -1  10  14   51.38    2.91
  -1  10  14   45.24    2.25
  -1  10  14   46.56    2.31
   1 -10 -14   54.75    2.38
   1 -10 -14   49.80    2.31
  -1  10  13   70.80    3.57
  -1  10  13   61.95    3.10
  -1  10  13   71.46    2.84
  -1  10  13   67.43    2.77
   1 -10 -13   69.48    2.71
   1 -10 -13   66.97    2.71
  -1  10  12    5.42    0.92
  -1  10  12    4.49    0.99
  -1  10  12    5.94    0.99
  -1  10  12    4.76    0.99
   1 -10 -12    4.62    0.86
   1 -10 -12    4.49    0.92
  -1  10  11   37.58    2.25
  -1  10  11   36.32    2.05
   1 -10 -11   38.77    2.18
   1 -10 -11   38.04    2.11
  -1  10  11   37.64    1.92
  -1  10  11   39.63    1.98
   1 -10 -11   35.99    1.85
   1 -10 -11   37.38    1.85
  -1  10  10    1.19    0.79
  -1  10  10    0.99    0.73
   1 -10 -10    1.45    0.79
   1 -10 -10   -0.73    0.73
  -1  10  10    1.52    0.86
  -1  10  10    0.86    0.92
   1 -10 -10    1.25    0.79
   1 -10 -10    1.65    0.79
  -1  10   9  139.35    5.88
  -1  10   9  140.54    5.81
   1 -10  -9  144.70    6.01
   1 -10  -9  140.41    5.88
  -1  10   9  153.75    4.69
  -1  10   9  149.52    4.62
   1 -10  -9  143.91    4.36
   1 -10  -9  142.85    4.49
  -1  10   8    4.82    0.92
  -1  10   8    4.29    0.86
   1 -10  -8    5.55    0.86
   1 -10  -8    5.09    0.86
  -1  10   8    4.89    0.99
  -1  10   8    6.34    0.99
   1 -10  -8    6.80    0.92
   1 -10  -8    4.29    0.92
  -1  10   7   19.28    1.52
  -1  10   7   15.12    1.25
   1 -10  -7   15.72    1.25
   1 -10  -7   15.39    1.25
  -1  10   7   16.11    1.39
  -1  10   7   14.00    1.25
   1 -10  -7   14.99    1.25
   1 -10  -7   16.18    1.25
  -1  10   6   16.97    1.39
  -1  10   6   19.35    1.39
   1 -10  -6   19.42    1.39
   1 -10  -6   18.69    1.39
  -1  10   6   19.88    1.39
  -1  10   6   19.88    1.32
   1 -10  -6   20.61    1.39
   1 -10  -6   19.22    1.25
  -1  10   5  136.91    5.75
  -1  10   5  138.96    5.75
   1 -10  -5  135.85    5.61
   1 -10  -5  136.78    5.68
  -1  10   5  125.61    4.03
  -1  10   5  130.11    4.03
   1 -10  -5  134.20    4.09
   1 -10  -5  126.41    3.96
  -1  10   4   97.61    4.29
  -1  10   4  105.27    4.49
   1 -10  -4  101.31    4.36
   1 -10  -4  105.14    4.49
  -1  10   4   92.59    3.17
  -1  10   4   95.63    3.30
   1 -10  -4   99.92    3.24
   1 -10  -4  101.38    3.37
  -1  10   3   27.47    1.78
  -1  10   3   28.73    1.72
   1 -10  -3   26.62    1.65
   1 -10  -3   25.23    1.65
  -1  10   3   24.11    1.45
  -1  10   3   25.29    1.52
   1 -10  -3   23.64    1.45
   1 -10  -3   27.61    1.45
  -1  10   2    2.51    0.86
  -1  10   2    1.25    0.73
   1 -10  -2    1.06    0.66
   1 -10  -2   -0.07    0.73
  -1  10   2    3.50    0.86
  -1  10   2    1.19    0.73
   1 -10  -2    2.25    0.73
   1 -10  -2    1.32    0.79
  -1  10   1    0.46    0.66
  -1  10   1    0.13    0.79
   1 -10  -1    0.26    0.73
   1 -10  -1    0.07    0.73
  -1  10   1    0.20    0.79
  -1  10   1    1.45    0.73
   1 -10  -1    0.79    0.66
   1 -10  -1    0.00    0.73
  -1  10   0  227.92    9.05
  -1  10   0  240.60    9.64
   1 -10   0  236.30    9.38
   1 -10   0  244.49    9.77
  -1  10   0  229.37    6.47
  -1  10   0  224.28    6.27
   1 -10   0  238.29    6.60
   1 -10   0  226.20    6.41
  -1  10  -1   21.40    1.45
  -1  10  -1   18.62    1.45
   1 -10   1   17.90    1.32
   1 -10   1   18.29    1.45
  -1  10  -1   17.96    1.25
  -1  10  -1   15.65    1.25
   1 -10   1   17.90    1.19
   1 -10   1   16.05    1.25
  -1  10  -2  124.95    5.35
  -1  10  -2  124.69    5.22
   1 -10   2  113.00    4.76
   1 -10   2  124.56    5.28
  -1  10  -2  118.75    3.83
  -1  10  -2  119.27    3.76
   1 -10   2  119.60    3.83
   1 -10   2  116.77    3.63
   1 -10   3   48.54    2.38
   1 -10   3   49.99    2.58
  -1  10  -3   42.66    1.92
  -1  10  -3   47.55    2.11
   1 -10   3   52.44    2.05
   1 -10   3   46.89    2.05
   1 -10   4   25.69    1.59
   1 -10   4   23.31    1.65
   1 -10   4   24.44    1.45
   1 -10   4   22.85    1.32
   1 -10   5  119.27    5.02
   1 -10   5  123.96    5.28
  -1  10  -5  121.78    3.83
  -1  10  -5  118.55    3.83
   1 -10   5  121.59    3.70
   1 -10   5  116.17    3.76
   1 -10   6   55.67    2.71
  -1  10  -6   55.61    2.38
   1 -10   6   62.41    2.25
   1 -10   6   59.57    2.44
   1 -10   7    6.27    1.06
   1 -10   7    6.93    0.92
  -1  10  -7   10.24    1.12
  -1  10  -7    7.26    0.92
   1 -10   7    9.38    0.99
   1 -10   7    6.34    0.99
   1 -10   8   25.23    1.59
   1 -10   8   21.99    1.65
  -1  10  -8   25.43    1.59
  -1  10  -8   20.01    1.25
   1 -10   9   57.00    2.77
   1 -10   9   57.00    2.91
  -1  10  -9   57.00    2.25
  -1  10  -9   55.34    2.38
   1 -10   9   63.01    2.58
   1 -10   9   62.01    2.38
  -1  10 -10  259.29   10.30
  -1  10 -11  161.67    5.02
  -1  10 -11  169.07    5.02
   1 -10  11  159.03    4.76
   1 -10  11  165.37    5.02
  -1  10 -12   -0.13    0.59
  -1  10 -12    3.37    0.99
  -1  10 -12    1.19    0.79
   1 -10  12    1.72    0.79
   1 -10  12    1.25    0.86
  -1  10 -13   64.06    3.10
  -1  10 -13   59.51    2.97
   1 -10  13   66.24    3.10
   1 -10  13   62.21    3.10
  -1  10 -14    1.32    0.79
  -1  10 -14   -0.07    0.66
   1 -10  14    0.73    0.66
   1 -10  14    0.86    0.86
  -1  10 -14    0.79    0.86
  -1  10 -14    0.66    0.92
   1 -10  14    0.79    0.79
   1 -10  14    0.13    0.92
  -1  10 -15   -0.26    0.66
  -1  10 -15    0.73    0.59
   1 -10  15    0.79    0.79
   1 -10  15    0.99    0.59
  -1  10 -15    0.46    0.92
  -1  10 -15    0.20    0.86
   1 -10  15   -1.45    0.92
   1 -10  15    0.79    0.79
  -1  10 -16    0.92    0.59
  -1  10 -16    1.32    0.66
   1 -10  16    1.12    0.53
   1 -10  16    0.73    0.73
  -1  10 -16    0.59    0.92
  -1  10 -16    1.19    0.99
   1 -10  16    0.59    0.86
   1 -10  16    2.91    1.06
  -1  10 -18    1.52    0.99
  -1  10 -18    0.53    0.99
   1 -10  18   -0.26    0.92
   1 -10  18    1.92    0.86
  -1   9  23    1.72    0.92
  -1   9  23    1.92    1.06
  -1   9  23    1.98    1.06
  -1   9  23    0.53    1.06
   1  -9 -23    1.45    1.06
   1  -9 -23    3.83    1.06
  -1   9  22   -0.86    0.99
  -1   9  22    0.07    1.06
   1  -9 -22   -0.46    0.40
   1  -9 -22    0.86    0.86
  -1   9  22   -0.40    0.92
  -1   9  22    1.06    1.06
   1  -9 -22   -0.13    0.92
   1  -9 -22   -0.33    0.86
  -1   9  21    1.06    0.99
  -1   9  21   -0.26    1.12
   1  -9 -21    0.20    0.92
   1  -9 -21   -0.20    0.33
  -1   9  21   -0.86    0.99
  -1   9  21   -0.40    0.92
   1  -9 -21    0.86    0.99
   1  -9 -21    0.40    0.86
   1  -9 -20    2.25    0.92
   1  -9 -20   -0.13    3.37
  -1   9  20    1.52    0.92
  -1   9  20    1.25    0.99
   1  -9 -20   -0.20    0.86
   1  -9 -20    0.13    0.99
  -1   9  19   11.49    1.45
  -1   9  19   11.49    1.45
  -1   9  19   12.94    1.52
  -1   9  19   11.69    1.25
   1  -9 -19   12.68    1.32
   1  -9 -19   13.47    1.39
  -1   9  18    7.66    1.19
  -1   9  18    7.99    1.25
   1  -9 -18    5.88    1.19
  -1   9  17    0.79    0.99
  -1   9  17    1.39    0.86
  -1   9  17    0.53    0.99
  -1   9  17    1.45    0.86
   1  -9 -17   -0.07    0.92
   1  -9 -17    1.32    0.86
  -1   9  16   18.62    1.59
  -1   9  16   18.76    1.52
  -1   9  16   15.39    1.45
  -1   9  16   16.91    1.45
   1  -9 -16   16.38    1.39
   1  -9 -16   18.36    1.45
   1  -9 -15    0.79    0.79
   1  -9 -15    0.13    0.46
  -1   9  15    0.92    0.86
  -1   9  15    0.07    0.92
   1  -9 -15    1.85    0.86
   1  -9 -15    1.98    0.86
  -1   9  14   25.16    1.92
  -1   9  14   23.18    1.65
  -1   9  14   26.29    1.72
  -1   9  14   23.25    1.59
   1  -9 -14   27.34    1.72
   1  -9 -14   26.81    1.65
  -1   9  13   -0.40    0.86
  -1   9  13   -0.46    0.86
   1  -9 -13   -0.26    0.73
   1  -9 -13    0.99    0.53
  -1   9  13    0.33    0.79
  -1   9  13   -1.06    0.86
   1  -9 -13   -0.26    0.73
   1  -9 -13    0.59    0.86
  -1   9  12    4.69    0.86
  -1   9  12    3.63    0.99
  -1   9  12    3.83    0.92
  -1   9  12    2.91    0.92
   1  -9 -12    5.61    0.92
   1  -9 -12    3.24    0.92
  -1   9  11    0.99    0.73
  -1   9  11    0.07    0.79
   1  -9 -11    0.07    0.73
   1  -9 -11    0.33    0.53
  -1   9  11    1.59    0.92
  -1   9  11    0.86    0.79
   1  -9 -11    0.66    0.73
   1  -9 -11    2.05    0.86
  -1   9  10    1.45    0.73
  -1   9  10    1.78    0.79
   1  -9 -10    2.58    0.79
   1  -9 -10    3.37    0.79
  -1   9  10    1.85    0.92
  -1   9  10    1.72    0.79
   1  -9 -10    2.77    0.86
   1  -9 -10    3.17    0.86
  -1   9   9   10.77    1.12
  -1   9   9    9.31    0.99
   1  -9  -9    9.44    0.99
   1  -9  -9    8.39    0.99
  -1   9   9    9.58    1.06
  -1   9   9    8.59    1.12
   1  -9  -9    9.44    1.06
   1  -9  -9    7.99    0.99
  -1   9   8  215.10    8.59
  -1   9   8  234.06    9.38
   1  -9  -8  236.77    9.38
   1  -9  -8  243.37    9.64
  -1   9   8  236.96    6.74
  -1   9   8  235.91    6.67
   1  -9  -8  235.78    6.60
   1  -9  -8  238.09    6.74
  -1   9   7    7.46    0.92
  -1   9   7    6.93    0.99
   1  -9  -7    8.59    0.99
   1  -9  -7    7.60    0.92
  -1   9   7    7.60    0.92
  -1   9   7    5.68    0.99
   1  -9  -7    8.98    0.99
   1  -9  -7    8.19    0.99
  -1   9   6   43.72    2.31
  -1   9   6   41.21    2.18
   1  -9  -6   45.90    2.31
   1  -9  -6   42.60    2.18
  -1   9   6   41.41    1.85
  -1   9   6   39.49    1.92
   1  -9  -6   42.47    1.92
   1  -9  -6   43.26    1.85
  -1   9   5   82.69    3.70
  -1   9   5   91.01    3.96
   1  -9  -5   79.52    3.50
   1  -9  -5   86.91    3.76
  -1   9   5   78.86    2.77
  -1   9   5   82.62    2.84
   1  -9  -5   80.51    2.71
   1  -9  -5   81.96    2.84
  -1   9   4  220.06    8.78
  -1   9   4  227.19    8.98
   1  -9  -4  233.33    9.25
   1  -9  -4  233.60    9.25
  -1   9   4  223.36    6.27
  -1   9   4  223.56    6.27
   1  -9  -4  216.56    6.08
   1  -9  -4  226.73    6.27
  -1   9   3   14.66    1.25
  -1   9   3   14.99    1.19
   1  -9  -3   15.65    1.19
   1  -9  -3   17.50    1.25
  -1   9   3   14.07    1.12
  -1   9   3   15.52    1.25
   1  -9  -3   16.05    1.19
   1  -9  -3   14.53    1.06
  -1   9   2    2.38    0.79
  -1   9   2    1.25    0.73
   1  -9  -2    2.91    0.73
   1  -9  -2    2.31    0.73
  -1   9   2    3.37    0.79
  -1   9   2    2.71    0.86
   1  -9  -2    1.78    0.79
   1  -9  -2    1.72    0.73
  -1   9   1   34.61    1.85
  -1   9   1   36.13    1.98
   1  -9  -1   36.46    1.98
   1  -9  -1   32.96    1.78
  -1   9   1   32.49    1.65
  -1   9   1   33.95    1.65
   1  -9  -1   37.12    1.65
   1  -9  -1   31.90    1.65
  -1   9   0   77.07    3.37
  -1   9   0   78.86    3.50
   1  -9   0   79.12    3.50
   1  -9   0   76.28    3.37
  -1   9   0   74.96    2.64
  -1   9   0   81.37    2.71
  -1   9  -1    9.31    1.06
  -1   9  -1   11.16    1.06
   1  -9   1   10.63    0.99
   1  -9   1   10.37    1.06
  -1   9  -1   10.63    0.99
  -1   9  -1   10.37    1.12
   1  -9   1   11.95    1.12
   1  -9   1   12.75    1.06
  -1   9  -2   19.42    1.32
   1  -9   2   16.78    1.45
   1  -9   2   19.28    1.32
  -1   9  -2   19.35    1.25
  -1   9  -2   21.20    1.39
   1  -9   2   19.02    1.32
   1  -9   2   19.68    1.25
  -1   9  -3   27.74    1.65
   1  -9   3   25.69    1.59
   1  -9   3   28.86    1.45
   1  -9   3   28.73    1.52
  -1   9  -4   24.44    1.59
  -1   9  -4   26.88    1.52
  -1   9  -4   26.62    1.39
   1  -9   4   30.31    1.45
   1  -9   4   27.87    1.52
  -1   9  -5   12.61    1.06
  -1   9  -5   16.58    1.25
   1  -9   5   14.20    1.12
   1  -9   5   13.47    1.06
  -1   9  -6   76.94    2.77
  -1   9  -6   77.60    2.71
   1  -9   6   81.63    2.71
   1  -9   6   79.38    2.84
  -1   9  -7    0.00    0.46
  -1   9  -7   -1.12    0.66
  -1   9  -7   -0.07    0.79
   1  -9   7   -0.53    0.73
   1  -9   7    0.00    0.66
   1  -9   8   69.28    3.30
  -1   9  -8   71.59    2.64
  -1   9  -8   74.70    2.58
   1  -9   8   72.38    2.51
   1  -9   8   65.71    2.51
  -1   9  -9    0.59    0.46
  -1   9  -9   -0.20    0.73
   1  -9   9    0.59    0.66
   1  -9   9    0.13    0.79
  -1   9  -9    0.73    0.79
  -1   9  -9    0.73    0.66
   1  -9   9    0.99    0.73
  -1   9 -10    0.00    0.53
  -1   9 -10    1.98    0.73
   1  -9  10    2.05    0.92
   1  -9  10    2.11    0.66
  -1   9 -10    2.91    0.86
  -1   9 -10    1.85    0.79
   1  -9  10    2.51    0.73
   1  -9  10    2.77    0.86
   1  -9  11   33.55    1.98
   1  -9  11   32.69    1.85
  -1   9 -11   36.85    1.72
  -1   9 -11   32.30    1.78
   1  -9  11   33.15    1.65
   1  -9  11   33.81    1.78
  -1   9 -12    6.01    0.86
  -1   9 -12    3.04    0.86
   1  -9  12    4.49    0.92
   1  -9  12    6.21    0.86
  -1   9 -12    5.15    0.86
  -1   9 -12    5.61    1.06
   1  -9  12    5.35    0.92
   1  -9  12    5.88    0.86
  -1   9 -13    9.71    1.06
  -1   9 -13   12.68    1.12
   1  -9  13   10.70    0.99
   1  -9  13   13.01    1.25
  -1   9 -13   10.10    1.19
  -1   9 -13   11.69    1.06
   1  -9  13   10.83    1.06
   1  -9  13   11.82    1.19
  -1   9 -14   31.24    1.72
  -1   9 -14   29.79    1.78
   1  -9  14   32.36    1.72
   1  -9  14   31.50    1.92
  -1   9 -14   37.45    1.85
  -1   9 -14   32.63    1.92
   1  -9  14   32.96    1.72
   1  -9  14   37.05    1.92
  -1   9 -15    7.40    0.92
  -1   9 -15    7.73    0.79
   1  -9  15    9.44    0.99
   1  -9  15    8.06    0.86
  -1   9 -15    8.39    1.06
  -1   9 -15    8.85    1.19
   1  -9  15    7.40    0.99
   1  -9  15    9.58    1.19
   1  -9  16    9.44    0.92
   1  -9  16   10.70    0.86
  -1   9 -16   10.24    1.25
  -1   9 -16    8.52    1.25
   1  -9  16    8.19    1.12
   1  -9  16   12.09    1.32
  -1   9 -17   26.35    1.78
  -1   9 -17   30.31    1.85
  -1   9 -19    0.92    1.06
  -1   9 -19    0.79    0.92
   1  -9  19   -0.66    0.92
   1  -9  19    0.92    0.79
  -1   8  23   -1.25    1.06
  -1   8  23   -0.73    0.79
  -1   8  23    1.32    1.06
  -1   8  23   -0.07    0.99
   1  -8 -23   -0.26    0.92
   1  -8 -23   -0.07    0.92
  -1   8  22    1.32    0.86
  -1   8  22    0.99    1.19
   1  -8 -22   -0.40    0.40
   1  -8 -22    1.12    0.92
  -1   8  22    0.20    0.86
  -1   8  22    1.52    1.12
   1  -8 -22    2.38    0.99
   1  -8 -22    2.51    0.99
  -1   8  21    0.66    1.12
  -1   8  21   -0.53    0.99
   1  -8 -21    0.20    0.46
   1  -8 -21   -0.92    0.86
  -1   8  21    1.12    0.92
  -1   8  21    0.00    1.12
   1  -8 -21    0.33    0.86
   1  -8 -21    0.79    1.06
  -1   8  20    6.21    1.25
  -1   8  20    4.76    1.19
  -1   8  20    5.48    1.06
  -1   8  20    4.69    1.25
   1  -8 -20    4.69    1.12
   1  -8 -20    6.47    1.06
  -1   8  19   18.95    1.72
  -1   8  19   17.17    1.65
   1  -8 -19   17.24    1.65
  -1   8  18    0.40    0.92
  -1   8  18   -1.06    0.92
   1  -8 -18    0.40    0.86
   1  -8 -18   -0.07    0.33
  -1   8  18   -0.53    0.92
   1  -8 -18    1.12    0.92
   1  -8 -18   -0.99    0.86
  -1   8  17   14.53    1.45
  -1   8  17   10.96    1.25
  -1   8  17   10.70    1.32
  -1   8  17   10.90    1.19
   1  -8 -17   12.42    1.32
   1  -8 -17   12.09    1.25
  -1   8  16   19.02    1.45
  -1   8  16   17.96    1.52
  -1   8  16   17.90    1.39
  -1   8  16   17.63    1.45
   1  -8 -16   16.44    1.39
  -1   8  15   23.91    1.72
  -1   8  15   23.51    1.59
  -1   8  15   22.92    1.65
  -1   8  15   27.34    1.65
   1  -8 -15   26.35    1.65
   1  -8 -15   24.57    1.59
  -1   8  14   50.33    2.77
  -1   8  14   55.15    2.77
  -1   8  14   49.73    2.25
  -1   8  14   50.26    2.25
   1  -8 -14   49.20    2.18
   1  -8 -14   48.94    2.25
  -1   8  13   52.04    2.31
  -1   8  13   50.46    2.18
   1  -8 -13   52.24    2.25
   1  -8 -13   53.23    2.31
  -1   8  12    7.13    0.99
  -1   8  12    8.12    1.12
  -1   8  12    9.11    1.06
  -1   8  12    8.92    1.12
   1  -8 -12    9.64    1.06
   1  -8 -12    9.77    1.12
  -1   8  11  203.94    8.26
  -1   8  11  199.19    7.99
  -1   8  11  200.31    5.88
  -1   8  11  208.30    6.01
   1  -8 -11  192.32    5.55
   1  -8 -11  199.45    5.81
  -1   8  10   16.31    1.32
  -1   8  10   17.44    1.32
  -1   8  10   18.16    1.39
  -1   8  10   21.60    1.45
   1  -8 -10   21.53    1.39
   1  -8 -10   19.42    1.32
  -1   8   9   54.62    2.64
  -1   8   9   52.57    2.64
   1  -8  -9   58.38    2.77
   1  -8  -9   51.78    2.58
  -1   8   9   54.88    2.25
  -1   8   9   52.37    2.25
   1  -8  -9   55.28    2.25
   1  -8  -9   57.19    2.31
  -1   8   8  145.69    6.01
  -1   8   8  135.26    5.55
   1  -8  -8  147.28    6.01
   1  -8  -8  142.98    5.88
  -1   8   8  148.66    4.49
  -1   8   8  138.03    4.16
   1  -8  -8  148.07    4.36
   1  -8  -8  136.64    4.16
  -1   8   7  195.82    7.79
  -1   8   7  201.23    8.06
   1  -8  -7  200.31    7.99
   1  -8  -7  201.70    8.06
  -1   8   7  200.77    5.75
  -1   8   7  196.28    5.55
   1  -8  -7  200.18    5.61
   1  -8  -7  198.86    5.68
  -1   8   6    6.47    0.86
   1  -8  -6    5.81    0.86
  -1   8   6    4.42    0.79
  -1   8   6    5.22    0.92
   1  -8  -6    4.62    0.86
   1  -8  -6    4.16    0.86
  -1   8   5   44.38    2.38
   1  -8  -5   51.65    2.58
  -1   8   5   48.34    1.98
   1  -8  -5   47.88    2.05
  -1   8   2   26.81    1.52
   1  -8  -2   25.82    1.39
  -1   8   1   76.08    3.43
   1  -8  -1   82.29    3.63
  -1   8   1   77.01    2.71
   1  -8  -1   78.86    2.64
  -1   8   0  104.08    4.42
   1  -8   0   94.90    4.16
   1  -8   0   97.22    4.16
  -1   8   0  101.18    3.24
   1  -8   0  101.77    3.10
  -1   8  -1    9.58    0.99
  -1   8  -1   10.77    1.06
   1  -8   1    8.45    0.99
   1  -8   1   11.03    1.06
  -1   8  -1   11.29    1.06
   1  -8   1   12.28    0.99
  -1   8  -2  480.40   18.43
  -1   8  -2  515.07   19.81
   1  -8   2  519.30   19.88
   1  -8   2  505.30   19.42
  -1   8  -2  475.05   12.42
   1  -8   2  468.84   12.15
  -1   8  -3    0.86    0.59
  -1   8  -3    3.04    0.73
   1  -8   3    1.72    0.66
   1  -8   3    2.44    0.73
   1  -8   4  191.46    7.66
   1  -8   4  195.75    7.79
   1  -8   5  118.02    4.89
   1  -8   5  111.68    4.69
  -1   8  -5  102.24    3.24
   1  -8   6   30.25    1.65
   1  -8   6   28.99    1.65
  -1   8  -6   33.42    1.52
  -1   8  -6   30.58    1.65
   1  -8   6   29.92    1.39
   1  -8   6   29.52    1.52
   1  -8   7   72.65    3.24
  -1   8  -7   78.39    2.64
  -1   8  -7   79.78    2.77
   1  -8   7   81.23    2.64
   1  -8   7   78.66    2.71
   1  -8   8  231.81    9.11
   1  -8   8  239.41    9.44
  -1   8  -8  227.65    6.27
  -1   8  -8  230.10    6.47
   1  -8   8  228.38    6.41
   1  -8   8  219.07    6.08
  -1   8  -9   35.40    1.78
  -1   8  -9   40.81    1.78
   1  -8   9   36.26    1.59
   1  -8   9   36.72    1.78
  -1   8 -10    3.76    0.79
  -1   8 -10    2.18    0.86
  -1   8 -11    3.43    0.73
  -1   8 -11    1.78    0.66
   1  -8  11    2.31    0.73
   1  -8  11    2.31    0.66
  -1   8 -11    2.84    0.79
  -1   8 -11    2.58    0.86
   1  -8  11    3.37    0.73
   1  -8  11    4.42    0.86
  -1   8 -12   33.29    1.78
  -1   8 -12   29.59    1.72
   1  -8  12   33.75    1.92
   1  -8  12   36.32    1.92
  -1   8 -12   37.25    1.72
  -1   8 -12   33.22    1.85
  -1   8 -13   20.80    1.32
  -1   8 -13   23.38    1.45
   1  -8  13   23.45    1.52
  -1   8 -13   26.68    1.45
  -1   8 -13   24.90    1.65
   1  -8  13   27.01    1.45
   1  -8  13   30.31    1.65
  -1   8 -14    7.00    0.73
  -1   8 -14    6.01    0.86
   1  -8  14    6.67    0.86
   1  -8  14    5.48    0.66
  -1   8 -14    7.13    1.12
  -1   8 -14    8.45    0.99
   1  -8  14    6.01    0.92
   1  -8  14    8.32    1.06
  -1   8 -15   18.49    1.06
  -1   8 -15   21.07    1.25
   1  -8  15   20.54    1.25
   1  -8  15   21.60    1.19
  -1   8 -15   24.11    1.52
  -1   8 -15   20.14    1.65
   1  -8  15   23.71    1.52
   1  -8  15   21.73    1.45
  -1   8 -16    8.52    1.25
  -1   8 -16    9.71    1.12
   1  -8  16    8.78    1.19
   1  -8  16    8.78    1.06
  -1   8 -17   10.10    1.25
  -1   8 -17    9.91    1.32
   1  -8  17    8.78    1.12
   1  -8  17    9.44    1.25
  -1   8 -20    4.36    1.19
  -1   8 -20    6.21    1.25
   1  -8  20    5.28    1.12
   1  -8  20    5.35    1.06
  -1   7  24   -0.66    1.06
  -1   7  24   -0.59    0.99
   1  -7 -24    2.38    1.06
   1  -7 -24   -0.20    0.99
  -1   7  23    0.33    1.06
  -1   7  23    2.31    0.92
   1  -7 -23    0.59    0.92
   1  -7 -23    1.12    0.99
  -1   7  22    0.53    1.06
  -1   7  22    0.00    0.73
   1  -7 -22    0.07    0.40
  -1   7  22   -0.07    1.06
  -1   7  22    0.79    0.79
   1  -7 -22    0.86    0.92
   1  -7 -22    0.33    0.99
  -1   7  21   -0.66    0.99
  -1   7  21    1.12    0.86
   1  -7 -21   -0.99    0.73
   1  -7 -21   -0.40    0.40
  -1   7  21   -0.53    0.99
  -1   7  21    1.06    0.92
   1  -7 -21   -0.73    0.86
   1  -7 -21   -0.33    0.99
  -1   7  20    0.59    0.99
  -1   7  20    1.72    0.99
   1  -7 -20    0.40    0.40
   1  -7 -20    2.64    0.86
   1  -7 -20    0.99    0.99
  -1   7  19    6.01    1.19
  -1   7  19    6.80    1.19
  -1   7  19    7.73    1.25
  -1   7  19    6.74    1.06
   1  -7 -19    5.88    1.12
   1  -7 -19    7.53    1.19
  -1   7  18    7.66    1.19
  -1   7  18    6.80    1.19
  -1   7  18    7.33    1.06
   1  -7 -18    7.20    1.06
   1  -7 -18    8.26    1.19
  -1   7  17   18.76    1.52
  -1   7  17   18.95    1.59
  -1   7  17   16.84    1.39
  -1   7  17   18.49    1.59
   1  -7 -17   19.48    1.52
   1  -7 -17   15.59    1.39
  -1   7  16    2.51    0.92
  -1   7  16    1.78    0.79
  -1   7  16    2.44    0.99
  -1   7  16    1.32    0.86
   1  -7 -16    0.59    0.86
   1  -7 -16    1.92    0.92
  -1   7  15    4.95    0.99
  -1   7  15    3.63    0.86
  -1   7  15    3.17    0.86
  -1   7  15    4.16    0.99
   1  -7 -15    4.56    0.99
   1  -7 -15    2.71    0.92
  -1   7  14   60.69    3.04
  -1   7  14   55.61    2.71
  -1   7  14   56.40    2.44
  -1   7  14   52.90    2.25
   1  -7 -14   59.77    2.44
   1  -7 -14   56.67    2.38
  -1   7  13    3.57    0.79
  -1   7  13    2.38    1.12
  -1   7  13    6.21    0.99
  -1   7  13    5.75    0.99
   1  -7 -13    4.49    0.86
   1  -7 -13    4.82    0.92
  -1   7  12   34.47    1.78
  -1   7  12   32.89    1.72
   1  -7 -12   33.48    1.72
   1  -7 -12   34.54    1.72
  -1   7  11    5.55    0.92
  -1   7  11    6.74    1.06
   1  -7 -11    7.13    0.92
   1  -7 -11    5.61    0.92
  -1   7  10   53.23    2.18
  -1   7  10   56.00    2.25
   1  -7 -10   55.28    2.18
   1  -7 -10   58.38    2.31
   1  -7  -9  197.67    7.93
  -1   7   9  206.32    5.81
  -1   7   9  195.75    5.61
   1  -7  -9  198.20    5.61
   1  -7  -9  198.92    5.68
  -1   7   8   -0.92    0.66
   1  -7  -8    0.46    0.66
  -1   7   8   -0.66    0.66
  -1   7   8    1.39    0.86
   1  -7  -8    0.46    0.79
   1  -7  -8    0.20    0.79
  -1   7   7  185.05    7.40
  -1   7   7  182.41    7.33
   1  -7  -7  187.17    7.46
   1  -7  -7  188.82    7.53
  -1   7   6   40.15    2.05
  -1   7   6   38.11    1.92
   1  -7  -6   39.63    1.98
   1  -7  -6   36.79    1.92
  -1   7   6   34.94    1.65
   1  -7  -6   36.39    1.65
  -1   7   5   11.36    0.99
  -1   7   5   14.00    1.12
   1  -7  -5   11.23    0.99
   1  -7  -5   12.48    1.06
  -1   7   5   13.14    1.06
  -1   7   5   12.55    0.99
   1  -7  -5   14.46    1.06
   1  -7  -5   13.34    1.06
  -1   7   4   66.90    2.97
  -1   7   4   66.18    2.97
   1  -7  -4   69.21    3.04
   1  -7  -4   67.56    2.97
  -1   7   4   65.52    2.38
  -1   7   4   62.81    2.25
   1  -7  -4   70.34    2.44
   1  -7  -4   71.86    2.38
  -1   7   3  181.62    7.26
  -1   7   3  191.13    7.60
   1  -7  -3  180.56    7.20
   1  -7  -3  182.08    7.26
  -1   7   3  177.79    4.95
  -1   7   3  185.19    5.22
   1  -7  -3  186.18    5.15
   1  -7  -3  187.96    5.28
  -1   7   2  151.90    6.08
  -1   7   2  152.43    6.14
   1  -7  -2  150.05    6.08
   1  -7  -2  154.15    6.21
  -1   7   2  151.70    4.36
  -1   7   2  151.04    4.29
   1  -7  -2  161.61    4.56
   1  -7  -2  149.72    4.29
  -1   7   1   30.38    1.65
  -1   7   1   30.31    1.72
  -1   7   1   30.05    1.45
  -1   7   1   30.25    1.45
   1  -7  -1   29.06    1.45
   1  -7  -1   32.36    1.45
  -1   7   0  254.93    9.97
  -1   7   0  251.82    9.91
   1  -7   0  249.64    9.77
   1  -7   0  257.90   10.10
  -1   7   0  263.51    7.07
  -1   7   0  263.98    7.13
   1  -7   0  267.94    7.26
   1  -7   0  258.56    6.93
  -1   7  -1   24.30    1.45
  -1   7  -1   20.80    1.39
   1  -7   1   24.37    1.45
   1  -7   1   24.44    1.45
  -1   7  -1   21.33    1.32
  -1   7  -1   18.69    1.12
   1  -7   1   24.24    1.25
   1  -7   1   22.92    1.32
  -1   7  -2   13.67    1.06
  -1   7  -2   15.72    1.19
   1  -7   2   16.84    1.19
   1  -7   2   14.99    1.12
  -1   7  -2   14.73    1.06
  -1   7  -2   16.64    1.12
   1  -7   2   15.78    1.06
   1  -7   2   16.58    1.19
  -1   7  -3  289.80   11.23
  -1   7  -3  300.83   11.69
   1  -7   3  288.94   11.23
   1  -7   3  308.03   11.95
  -1   7  -3  295.81    7.93
  -1   7  -3  295.74    7.86
   1  -7   3  297.33    7.86
   1  -7   3  289.01    7.73
   1  -7   4   14.13    1.12
   1  -7   4   14.93    1.12
  -1   7  -4   16.64    1.19
  -1   7  -4   15.45    1.06
   1  -7   4   15.12    1.06
   1  -7   4   16.25    1.19
   1  -7   5  164.12    6.60
   1  -7   5  154.81    6.21
  -1   7  -5  154.81    4.49
  -1   7  -5  145.96    4.23
   1  -7   5  159.30    4.49
   1  -7   5  154.21    4.49
   1  -7   6  133.08    5.42
   1  -7   6  128.12    5.22
  -1   7  -6  133.01    3.96
   1  -7   6  129.78    3.83
   1  -7   7   31.11    1.65
   1  -7   7   30.31    1.65
   1  -7   8   24.57    1.39
   1  -7   8   24.37    1.45
  -1   7  -8   22.52    1.25
   1  -7   8   20.54    1.39
   1  -7   8   21.99    1.32
   1  -7   9   18.49    1.25
   1  -7   9   17.44    1.12
  -1   7  -9   15.92    1.25
  -1   7  -9   18.56    1.12
   1  -7   9   17.04    1.19
   1  -7   9   17.83    1.12
  -1   7 -10   -0.07    0.46
  -1   7 -10    0.07    0.53
   1  -7  10   -0.40    0.46
   1  -7  10    0.53    0.66
  -1   7 -10   -1.25    0.79
  -1   7 -10   -1.52    0.66
   1  -7  10    0.46    0.73
   1  -7  10   -0.73    0.59
  -1   7 -11   23.71    1.39
  -1   7 -11   25.69    1.52
   1  -7  11   23.12    1.39
   1  -7  11   25.62    1.45
  -1   7 -11   22.72    1.52
  -1   7 -11   26.35    1.39
   1  -7  11   22.65    1.45
  -1   7 -12  202.16    7.99
  -1   7 -12  193.57    7.66
  -1   7 -13   38.83    1.98
  -1   7 -13   38.44    1.85
   1  -7  13   41.61    2.11
   1  -7  13   38.97    1.85
  -1   7 -14    0.46    0.46
  -1   7 -14    0.53    0.53
   1  -7  14   -0.07    0.53
   1  -7  14    0.46    0.40
  -1   7 -14    0.73    0.92
  -1   7 -14    0.00    0.79
   1  -7  14   -0.07    0.73
   1  -7  14    0.46    0.86
   1  -7  15   19.09    0.99
  -1   7 -15   17.83    1.52
  -1   7 -15   16.44    1.25
   1  -7  15   19.02    1.39
   1  -7  15   16.25    1.25
  -1   7 -16   -0.26    0.92
  -1   7 -16   -0.20    0.79
   1  -7  16    0.99    0.79
   1  -7  16    0.66    0.92
  -1   7 -17    0.73    0.99
  -1   7 -17    0.13    0.99
   1  -7  17    0.33    0.92
   1  -7  17   -0.46    0.79
  -1   7 -18    3.17    1.06
  -1   7 -18    0.99    0.99
   1  -7  18    1.85    0.99
   1  -7  18    2.25    0.92
  -1   7 -19    0.20    0.99
  -1   7 -19   -2.11    0.92
   1  -7  19    0.20    0.79
   1  -7  19    0.92    0.92
  -1   7 -20   -0.46    1.12
  -1   7 -21    0.66    0.99
  -1   7 -21    1.39    0.99
   1  -7  21   -0.53    0.92
   1  -7  21    0.59    0.92
  -1   6  24   -0.20    0.99
  -1   6  24    0.20    1.06
   1  -6 -24   -0.07    1.06
   1  -6 -24    0.00    0.92
  -1   6  23    1.12    1.06
  -1   6  23    1.65    0.92
   1  -6 -23   -0.33    0.92
   1  -6 -23   -1.52    0.92
  -1   6  22    2.97    0.79
  -1   6  22    1.85    0.86
   1  -6 -22    0.07    0.46
   1  -6 -22    1.85    0.73
  -1   6  22    1.32    0.86
  -1   6  22    2.71    1.12
   1  -6 -22    1.78    0.92
   1  -6 -22    2.84    1.06
  -1   6  21   -0.13    0.66
  -1   6  21   -1.19    0.86
   1  -6 -21    0.13    1.32
   1  -6 -21    0.86    0.79
  -1   6  21    0.13    0.92
  -1   6  21   -0.07    0.99
   1  -6 -21    0.59    0.99
  -1   6  20    7.73    1.06
  -1   6  20    8.59    1.19
  -1   6  20    6.01    1.32
  -1   6  20    7.53    1.19
   1  -6 -20    6.08    1.32
   1  -6 -20    6.01    1.25
  -1   6  19    1.06    0.86
  -1   6  19   -0.20    0.79
   1  -6 -19    0.79    0.73
  -1   6  19    0.73    0.99
  -1   6  19   -0.46    0.86
   1  -6 -19   -0.79    0.92
   1  -6 -19    0.92    0.86
  -1   6  18   14.27    1.45
  -1   6  18   15.78    1.52
   1  -6 -18   18.89    1.45
  -1   6  18   17.90    1.45
  -1   6  18   15.78    1.52
   1  -6 -18   18.62    1.45
   1  -6 -18   15.78    1.52
   1  -6 -17   35.47    2.05
  -1   6  17   34.74    2.05
  -1   6  17   30.64    1.85
   1  -6 -17   33.02    1.92
   1  -6 -17   33.68    1.85
  -1   6  16    6.80    1.06
  -1   6  16    7.40    1.06
   1  -6 -16    9.05    1.06
  -1   6  16    9.25    1.19
  -1   6  16    9.31    1.12
   1  -6 -16   10.37    1.19
   1  -6 -16    8.65    1.19
  -1   6  15   22.45    1.52
  -1   6  15   25.96    1.78
   1  -6 -15   28.93    1.72
  -1   6  15   28.07    1.72
  -1   6  15   24.24    1.59
   1  -6 -15   26.81    1.72
  -1   6  14    9.51    1.12
  -1   6  14    6.93    0.92
  -1   6  14    8.65    1.12
  -1   6  14    7.53    1.06
   1  -6 -14    7.93    1.06
   1  -6 -14    6.60    1.06
  -1   6  13  122.97    5.09
  -1   6  13  130.77    5.48
  -1   6  13  121.52    3.90
  -1   6  13  119.87    3.90
   1  -6 -13  123.04    3.90
   1  -6 -13  118.94    3.83
  -1   6  12   14.53    1.19
  -1   6  12   17.37    1.32
  -1   6  12   16.78    1.25
  -1   6  12   16.71    1.32
   1  -6 -12   16.78    1.25
   1  -6 -12   14.99    1.19
  -1   6  11   65.32    2.97
  -1   6  11   62.68    2.91
  -1   6  11   61.42    2.38
  -1   6  11   64.33    2.44
   1  -6 -11   63.47    2.38
   1  -6 -11   64.39    2.38
  -1   6  10  121.52    5.02
  -1   6  10  132.29    5.42
  -1   6  10  117.16    3.63
  -1   6  10  117.69    3.70
   1  -6 -10  124.23    3.76
   1  -6 -10  122.97    3.76
  -1   6   9  297.92   11.56
  -1   6   9  305.32   11.89
  -1   6   8   11.23    1.06
  -1   6   8   11.69    0.99
   1  -6  -8   12.15    1.06
   1  -6  -8   10.70    0.92
  -1   6   8   10.37    1.06
   1  -6  -8   13.74    1.06
  -1   6   7    2.25    0.66
  -1   6   7    2.97    0.79
   1  -6  -7    3.24    0.73
   1  -6  -7    3.76    0.73
  -1   6   7    3.37    0.86
  -1   6   7    4.49    0.79
   1  -6  -7    3.30    0.79
   1  -6  -7    4.56    0.79
  -1   6   6  203.41    7.99
  -1   6   6  204.07    8.06
   1  -6  -6  219.26    8.59
   1  -6  -6  204.60    8.06
  -1   6   6  202.89    5.68
  -1   6   6  205.13    5.68
   1  -6  -6  201.63    5.55
   1  -6  -6  211.60    5.88
  -1   6   5    0.20    0.66
  -1   6   5   -0.66    0.73
   1  -6  -5   -0.53    0.59
   1  -6  -5   -0.20    0.59
  -1   6   5    1.39    0.73
  -1   6   5    0.00    0.66
   1  -6  -5    1.39    0.73
   1  -6  -5    0.73    0.66
  -1   6   4    0.40    0.66
  -1   6   4   -1.25    0.66
   1  -6  -4   -0.59    0.66
   1  -6  -4    0.66    0.59
  -1   6   4    0.00    0.66
  -1   6   4   -1.32    0.73
   1  -6  -4   -0.07    0.59
   1  -6  -4    0.53    0.73
  -1   6   3   27.74    1.59
  -1   6   3   29.13    1.52
   1  -6  -3   29.79    1.59
   1  -6  -3   28.00    1.52
  -1   6   3   25.82    1.32
  -1   6   3   26.48    1.25
   1  -6  -3   29.13    1.32
   1  -6  -3   28.80    1.39
  -1   6   2  124.76    5.09
  -1   6   2  128.19    5.15
   1  -6  -2  117.56    4.76
   1  -6  -2  119.87    4.89
  -1   6   2  121.19    3.57
  -1   6   2  121.45    3.57
   1  -6  -2  126.61    3.70
   1  -6  -2  125.28    3.57
  -1   6   1   15.59    1.12
  -1   6   1   17.90    1.19
   1  -6  -1   14.66    1.06
   1  -6  -1   15.59    1.06
  -1   6   1   13.60    0.99
  -1   6   1   15.12    1.06
   1  -6  -1   16.71    1.12
   1  -6  -1   15.72    0.99
  -1   6   0  253.87    9.84
  -1   6   0  258.63   10.10
   1  -6   0  255.26    9.91
   1  -6   0  253.87    9.91
  -1   6   0  256.38    6.80
  -1   6   0  254.66    6.80
   1  -6   0  254.14    6.74
   1  -6   0  254.07    6.80
  -1   6  -1   54.22    2.44
  -1   6  -1   54.09    2.44
   1  -6   1   53.89    2.44
   1  -6   1   53.56    2.38
  -1   6  -1   55.94    1.92
  -1   6  -1   54.16    1.98
   1  -6   1   58.05    1.98
   1  -6   1   55.87    1.98
  -1   6  -2  205.33    8.06
  -1   6  -2  195.29    7.66
   1  -6   2  200.90    7.86
   1  -6   2  211.14    8.26
  -1   6  -2  194.50    5.35
  -1   6  -2  196.35    5.35
   1  -6   2  201.10    5.42
   1  -6   2  203.94    5.61
  -1   6  -3   16.18    1.12
  -1   6  -3   15.78    1.06
   1  -6   3   16.25    1.12
   1  -6   3   15.45    1.06
  -1   6  -3   15.32    0.99
  -1   6  -3   15.39    1.06
   1  -6   3   15.59    1.06
   1  -6   3   15.39    0.99
   1  -6   4  123.44    4.95
   1  -6   4  128.06    5.15
  -1   6  -4  133.61    3.83
  -1   6  -4  132.09    3.90
   1  -6   4  133.28    3.90
   1  -6   4  133.14    3.83
  -1   6  -5    0.40    0.40
  -1   6  -5    1.52    0.59
   1  -6   5    1.78    0.66
   1  -6   5    0.99    0.66
  -1   6  -5    2.05    0.79
  -1   6  -5    2.18    0.73
   1  -6   5    2.38    0.66
   1  -6   5    1.52    0.79
   1  -6   6   16.11    1.06
   1  -6   6   18.23    1.19
  -1   6  -6   17.83    1.06
  -1   6  -6   18.03    1.12
   1  -6   6   16.97    1.19
   1  -6   6   19.55    1.12
  -1   6  -7   21.27    1.25
  -1   6  -7   19.68    1.12
   1  -6   7   21.20    1.19
   1  -6   7   21.86    1.25
  -1   6  -8   -0.13    0.33
  -1   6  -8    1.06    0.53
   1  -6   8    1.32    0.59
  -1   6  -8    1.39    0.73
   1  -6   8    1.45    0.59
   1  -6   8    0.26    0.73
   1  -6   9  161.54    6.41
   1  -6   9  156.99    6.21
  -1   6 -10    0.92    0.53
  -1   6 -10    0.66    0.53
   1  -6  10    0.59    0.46
   1  -6  10    1.85    0.66
  -1   6 -10    0.86    0.79
  -1   6 -10    0.40    0.59
   1  -6  10   -0.46    0.59
   1  -6  10    1.85    0.73
  -1   6 -11   86.25    3.63
  -1   6 -11   93.12    3.83
   1  -6  11   86.25    3.57
   1  -6  11   82.03    3.43
  -1   6 -11   78.33    2.84
  -1   6 -11   83.28    2.77
   1  -6  11   78.06    2.64
   1  -6  11   76.94    2.71
  -1   6 -12    8.72    0.73
  -1   6 -12    8.19    0.79
   1  -6  12    7.79    0.66
   1  -6  12    8.98    0.79
  -1   6 -12    8.92    1.12
  -1   6 -12    9.64    0.99
   1  -6  12    9.44    0.99
   1  -6  12   12.81    1.12
  -1   6 -13    1.52    0.46
  -1   6 -13    1.85    0.53
   1  -6  13    1.72    0.40
   1  -6  13    1.25    0.53
  -1   6 -13    1.78    0.79
  -1   6 -13    2.25    0.92
   1  -6  13    3.10    0.86
   1  -6  13    0.92    0.73
   1  -6  14   12.81    0.73
  -1   6 -14   13.74    1.12
  -1   6 -14   12.02    1.25
   1  -6  14   10.30    1.06
   1  -6  14   13.27    1.19
  -1   6 -15    4.69    1.06
  -1   6 -15    3.30    0.79
   1  -6  15    5.02    0.99
   1  -6  15    3.90    0.86
  -1   6 -16    0.59    0.86
  -1   6 -16    1.25    0.92
   1  -6  16    2.11    0.92
   1  -6  16    1.78    0.79
  -1   6 -17   14.13    1.45
  -1   6 -17   16.44    1.39
   1  -6  17   15.78    1.32
   1  -6  17   15.32    1.39
  -1   6 -18    4.82    1.06
  -1   6 -18    3.50    1.12
   1  -6  18    3.04    0.92
   1  -6  18    3.04    0.92
  -1   6 -19   13.60    1.39
  -1   6 -19   14.60    1.45
   1  -6  19   13.60    1.39
   1  -6  19   11.82    1.32
  -1   6 -20    3.90    1.12
  -1   6 -21    1.59    1.12
  -1   6 -21    0.40    1.06
   1  -6  21   -1.52    0.79
   1  -6  21    0.92    0.99
  -1   5  24    0.79    0.99
  -1   5  24    0.13    1.06
   1  -5 -24    2.31    1.06
   1  -5 -24    2.18    0.92
  -1   5  23    1.32    0.99
  -1   5  23    1.25    0.92
   1  -5 -23    1.25    1.06
   1  -5 -23    2.58    1.06
  -1   5  22    0.40    0.59
  -1   5  22    0.20    0.66
   1  -5 -22    0.86    0.53
   1  -5 -22    0.33    0.66
  -1   5  22    0.86    0.92
   1  -5 -22   -0.20    0.92
   1  -5 -22    1.19    1.06
  -1   5  21    3.70    0.86
  -1   5  21    1.98    0.79
   1  -5 -21    5.94    0.86
   1  -5 -21    3.83    0.79
   1  -5 -21    1.59    1.12
  -1   5  20    1.72    0.79
  -1   5  20    1.59    0.66
   1  -5 -20    1.65    0.66
   1  -5 -20   -0.33    0.40
  -1   5  20    1.12    0.92
  -1   5  20    2.77    1.12
   1  -5 -20    2.64    0.92
   1  -5 -20    1.52    0.99
  -1   5  19    4.69    0.99
  -1   5  19    2.51    0.73
  -1   5  19    3.83    0.99
  -1   5  19    3.43    1.12
   1  -5 -19    4.23    0.99
   1  -5 -19    3.37    1.19
  -1   5  18    0.20    0.66
  -1   5  18    1.19    0.86
   1  -5 -18    0.86    0.66
   1  -5 -18    0.07    0.40
  -1   5  18   -0.66    0.86
  -1   5  18    0.53    0.99
   1  -5 -18   -1.25    0.79
   1  -5 -18    1.39    0.99
  -1   5  17    7.73    0.99
  -1   5  17    9.05    1.12
  -1   5  17    5.42    1.12
   1  -5 -17    7.46    1.06
   1  -5 -17    8.06    1.19
  -1   5  16   17.24    1.32
  -1   5  16   14.46    1.32
  -1   5  16   15.92    1.39
  -1   5  16   17.04    1.39
   1  -5 -16   14.79    1.32
   1  -5 -16   14.86    1.39
  -1   5  15    1.39    0.73
  -1   5  15    2.77    0.79
   1  -5 -15   -0.53    0.26
   1  -5 -15    1.52    0.73
  -1   5  15    0.79    0.86
  -1   5  15    1.06    0.86
   1  -5 -15    0.79    0.86
   1  -5 -15    2.31    0.92
  -1   5  14   -0.46    0.73
  -1   5  14    1.19    0.66
   1  -5 -14    0.00    0.59
   1  -5 -14   -0.07    0.33
  -1   5  14    1.19    0.86
  -1   5  14    1.32    0.79
   1  -5 -14    0.07    0.79
   1  -5 -14    0.92    0.86
  -1   5  13   98.87    4.16
  -1   5  13   98.40    4.23
  -1   5  13   87.11    3.04
  -1   5  13   87.77    3.04
   1  -5 -13   87.77    3.04
   1  -5 -13   91.07    3.10
  -1   5  12   28.86    1.65
  -1   5  12   32.10    1.78
  -1   5  12   30.25    1.65
  -1   5  12   32.30    1.65
   1  -5 -12   28.33    1.52
   1  -5 -12   29.92    1.59
  -1   5  11  398.31   15.32
  -1   5  11  409.93   15.78
  -1   5  11  400.22   10.57
   1  -5 -11  386.09   10.24
  -1   5  10  115.25    4.76
  -1   5  10  117.76    4.82
  -1   5   9   29.79    1.59
  -1   5   9   31.30    1.72
  -1   5   9   32.10    1.52
  -1   5   9   30.51    1.52
   1  -5  -9   32.23    1.52
   1  -5  -9   34.67    1.59
  -1   5   8   41.34    1.98
  -1   5   8   46.63    2.25
   1  -5  -8   48.08    2.18
   1  -5  -8   44.32    2.11
  -1   5   8   43.99    1.85
  -1   5   8   38.17    1.65
  -1   5   7   96.95    4.03
  -1   5   7  107.98    4.42
   1  -5  -7  112.01    4.56
   1  -5  -7  108.71    4.42
  -1   5   7   98.54    3.10
  -1   5   7   95.96    2.97
   1  -5  -7  107.65    3.30
   1  -5  -7  103.75    3.17
  -1   5   6    8.65    0.92
  -1   5   6   10.43    0.92
   1  -5  -6   10.57    0.92
   1  -5  -6   10.10    0.92
  -1   5   6    7.53    0.92
  -1   5   6    7.99    0.86
   1  -5  -6    7.20    0.86
   1  -5  -6    7.33    0.86
  -1   5   5  223.03    8.72
  -1   5   5  225.94    8.85
   1  -5  -5  225.34    8.78
   1  -5  -5  235.64    9.18
  -1   5   5  226.73    6.14
  -1   5   5  228.71    6.14
   1  -5  -5  230.23    6.21
   1  -5  -5  230.69    6.21
  -1   5   4   -1.32    0.59
  -1   5   4    0.00    0.66
   1  -5  -4   -0.07    0.59
   1  -5  -4    0.00    0.59
  -1   5   4   -0.13    0.73
  -1   5   4    0.13    0.66
   1  -5  -4    0.13    0.66
   1  -5  -4   -0.40    0.59
  -1   5   3   20.94    1.25
  -1   5   3   21.99    1.32
   1  -5  -3   24.96    1.39
   1  -5  -3   25.82    1.39
  -1   5   3   22.92    1.25
  -1   5   3   21.20    1.12
   1  -5  -3   21.73    1.19
   1  -5  -3   23.45    1.19
  -1   5   2  528.41   20.14
  -1   5   2  530.33   20.21
   1  -5  -2  555.95   21.13
   1  -5  -2  532.58   20.28
  -1   5   2  526.70   13.41
  -1   5   2  526.57   13.41
   1  -5  -2  525.24   13.41
   1  -5  -2  521.08   13.21
  -1   5   1  440.64   16.84
  -1   5   1  456.56   17.44
   1  -5  -1  446.39   17.04
   1  -5  -1  449.36   17.17
  -1   5   1  454.45   11.62
  -1   5   1  454.64   11.62
   1  -5  -1  453.26   11.62
   1  -5  -1  453.39   11.56
  -1   5   0  503.52   19.15
  -1   5   0  532.25   20.28
   1  -5   0  522.07   19.88
   1  -5   0  512.56   19.55
  -1   5   0  525.31   13.41
  -1   5   0  544.07   13.80
   1  -5   0  534.16   13.60
   1  -5   0  534.89   13.54
  -1   5  -1  908.10   34.34
  -1   5  -1  948.39   35.86
   1  -5   1  917.35   34.67
   1  -5   1  931.88   35.27
  -1   5  -1  956.31   23.97
  -1   5  -1  956.31   23.91
   1  -5   1  949.05   23.78
   1  -5   1  957.63   23.97
  -1   5  -2  356.97   13.67
  -1   5  -2  370.83   14.20
   1  -5   2  369.18   14.13
   1  -5   2  372.62   14.27
  -1   5  -2  363.97    9.44
  -1   5  -2  375.19    9.64
   1  -5   2  379.02    9.84
   1  -5   2  365.49    9.38
  -1   5  -3  159.17    6.27
  -1   5  -3  160.82    6.34
   1  -5   3  155.53    6.14
   1  -5   3  159.03    6.27
  -1   5  -3  153.09    4.29
  -1   5  -3  159.69    4.42
   1  -5   3  149.13    4.23
   1  -5   3  156.39    4.29
  -1   5  -4    2.25    0.59
  -1   5  -4    2.58    0.59
   1  -5   4    3.17    0.59
   1  -5   4    3.10    0.59
  -1   5  -4    2.38    0.73
  -1   5  -4    3.24    0.66
   1  -5   4    2.64    0.73
   1  -5   4    2.58    0.66
   1  -5   5   35.66    1.65
   1  -5   5   37.45    1.78
  -1   5  -5   37.18    1.59
  -1   5  -5   37.12    1.52
   1  -5   5   37.31    1.59
   1  -5   5   37.05    1.45
   1  -5   6  118.75    4.76
   1  -5   6  120.40    4.82
  -1   5  -6  118.75    3.57
  -1   5  -6  123.96    3.57
   1  -5   6  124.56    3.63
   1  -5   6  121.19    3.50
   1  -5   7  145.30    5.75
   1  -5   7  148.80    5.88
  -1   5  -7  140.67    4.09
  -1   5  -7  141.53    4.03
   1  -5   7  146.22    4.23
   1  -5   7  145.36    4.09
   1  -5   8  117.03    4.69
   1  -5   8  120.33    4.82
  -1   5  -8  121.85    3.70
  -1   5  -8  123.04    3.57
   1  -5   8  124.49    3.70
   1  -5   8  121.85    3.57
  -1   5  -9    1.06    0.40
  -1   5  -9    0.86    0.46
   1  -5   9    1.25    0.59
   1  -5   9    1.78    0.53
  -1   5  -9    0.73    0.73
  -1   5  -9    0.59    0.59
   1  -5   9    1.98    0.73
   1  -5   9    1.06    0.66
  -1   5 -10   49.00    2.11
  -1   5 -10   48.08    2.11
   1  -5  10   49.27    2.18
   1  -5  10   49.73    2.11
  -1   5 -11   31.17    1.52
  -1   5 -11   30.45    1.39
   1  -5  11   29.65    1.39
   1  -5  11   30.25    1.45
  -1   5 -11   28.40    1.59
  -1   5 -11   32.56    1.52
   1  -5  11   31.44    1.59
   1  -5  11   30.58    1.45
  -1   5 -12   -0.13    0.33
  -1   5 -12    0.86    0.40
   1  -5  12    0.26    0.40
   1  -5  12    0.46    0.33
  -1   5 -12    0.20    0.79
  -1   5 -12    0.33    0.73
   1  -5  12   -0.40    0.79
   1  -5  12   -0.92    0.66
   1  -5  13   54.75    2.18
  -1   5 -13   54.95    2.31
  -1   5 -13   55.34    2.18
   1  -5  13   55.01    2.25
   1  -5  13   55.08    2.18
  -1   5 -14   -0.99    0.86
  -1   5 -14   -0.59    0.73
   1  -5  14    0.00    0.86
   1  -5  14   -0.26    0.73
  -1   5 -15   33.48    1.72
  -1   5 -15   31.57    1.85
   1  -5  15   31.70    1.78
   1  -5  15   28.27    1.59
  -1   5 -16    7.26    1.06
  -1   5 -16    5.61    1.06
   1  -5  16    5.88    1.06
   1  -5  16    4.29    0.92
  -1   5 -17   11.16    1.19
  -1   5 -17    9.51    1.32
   1  -5  17    8.85    1.19
   1  -5  17    8.12    1.06
  -1   5 -18    9.97    1.39
  -1   5 -18   10.77    1.25
   1  -5  18   12.15    1.25
   1  -5  18   10.96    1.12
  -1   5 -19    3.24    1.06
  -1   5 -19    3.50    1.12
   1  -5  19    2.91    0.99
   1  -5  19    3.90    0.99
   1  -5  20   -0.79    0.99
   1  -5  20    0.92    0.86
  -1   5 -21   -1.19    0.99
  -1   5 -22   -0.66    0.99
  -1   5 -22   -0.79    1.06
   1  -5  22    0.26    0.86
   1  -5  22   -0.26    0.92
  -1   4  24    1.25    0.99
  -1   4  24    1.32    1.06
   1  -4 -24   -0.73    1.06
   1  -4 -24    0.86    0.92
  -1   4  23    0.53    0.86
  -1   4  23   -0.92    0.92
   1  -4 -23    0.59    0.99
   1  -4 -23   -0.40    0.92
   1  -4 -22    3.70    1.12
  -1   4  21    0.07    0.53
  -1   4  21    0.13    0.59
   1  -4 -21    0.33    0.59
   1  -4 -21    0.33    0.46
  -1   4  21   -0.20    0.92
  -1   4  21   -1.06    0.92
   1  -4 -21    0.20    1.06
   1  -4 -21   -0.07    0.92
  -1   4  20    0.73    0.59
  -1   4  20    0.40    0.59
   1  -4 -20    0.59    0.53
   1  -4 -20    0.40    0.59
  -1   4  20    0.73    0.99
  -1   4  20    0.92    0.92
   1  -4 -20   -0.07    0.86
   1  -4 -20    0.46    0.99
  -1   4  19    1.85    0.59
  -1   4  19    2.25    0.79
   1  -4 -19    0.46    0.66
   1  -4 -19    1.39    0.59
  -1   4  19    0.92    0.99
  -1   4  19    0.92    0.92
   1  -4 -19    1.65    0.99
   1  -4 -19    1.52    0.86
  -1   4  18    7.26    0.79
  -1   4  18    6.41    0.92
  -1   4  18    7.86    1.12
  -1   4  18    6.34    1.12
   1  -4 -18    8.06    1.12
   1  -4 -18    6.80    1.12
  -1   4  17    3.63    0.86
  -1   4  17    4.42    0.73
  -1   4  17    3.96    1.06
  -1   4  17    5.88    1.06
   1  -4 -17    3.57    1.06
   1  -4 -17    5.48    0.99
  -1   4  16    7.66    0.92
  -1   4  16    7.33    0.92
  -1   4  16    6.74    1.06
  -1   4  16    4.89    1.06
   1  -4 -16    7.79    1.06
   1  -4 -16    7.46    1.12
  -1   4  15    0.46    0.73
  -1   4  15    0.92    0.59
   1  -4 -15    0.26    0.59
   1  -4 -15    0.07    0.33
  -1   4  15   -0.20    0.79
  -1   4  15    1.39    0.79
   1  -4 -15    1.59    0.86
   1  -4 -15    0.73    0.79
  -1   4  14   -0.40    0.59
  -1   4  14    0.59    0.73
   1  -4 -14   -0.33    0.26
   1  -4 -14   -0.33    0.59
  -1   4  14   -0.92    0.79
  -1   4  14   -1.25    0.79
  -1   4  13   30.05    1.65
  -1   4  13   30.71    1.72
  -1   4  13   33.15    1.72
  -1   4  13   31.63    1.72
   1  -4 -13   31.77    1.72
   1  -4 -13   34.41    1.72
   1  -4 -12    0.66    0.66
   1  -4 -12    0.07    0.33
  -1   4  12    1.12    0.86
   1  -4 -12    1.19    0.86
  -1   4  11   13.94    0.99
  -1   4  11   13.87    1.06
  -1   4  11   10.37    1.12
   1  -4 -11   11.62    1.06
  -1   4  10  176.27    7.00
  -1   4  10  172.70    6.80
   1  -4 -10   -0.53    0.33
  -1   4  10  163.33    4.69
  -1   4  10  170.00    4.89
  -1   4   9   91.80    3.76
  -1   4   9   89.95    3.76
  -1   4   9   96.49    3.04
  -1   4   9   92.06    2.91
   1  -4  -9   93.91    2.97
   1  -4  -9   87.18    2.77
  -1   4   8   13.21    0.99
  -1   4   8   13.01    0.92
  -1   4   8   11.62    0.99
  -1   4   8   12.94    0.99
   1  -4  -8   13.67    1.06
   1  -4  -8   12.55    0.99
  -1   4   7   45.31    2.11
  -1   4   7   43.06    1.98
  -1   4   7   42.86    1.72
  -1   4   7   40.42    1.59
   1  -4  -7   44.25    1.72
   1  -4  -7   46.69    1.78
  -1   4   6   14.73    0.99
  -1   4   6   15.32    0.99
   1  -4  -6   18.62    1.12
   1  -4  -6   16.64    1.06
  -1   4   6   15.26    1.06
  -1   4   6   13.47    0.92
   1  -4  -6   15.92    1.06
   1  -4  -6   15.52    0.99
  -1   4   5    4.49    0.66
  -1   4   5    5.35    0.73
   1  -4  -5    4.09    0.66
   1  -4  -5    5.42    0.73
  -1   4   5    4.36    0.79
  -1   4   5    4.09    0.73
   1  -4  -5    4.76    0.73
   1  -4  -5    2.77    0.73
  -1   4   4  207.11    8.06
  -1   4   4  200.51    7.79
   1  -4  -4  203.35    7.93
   1  -4  -4  202.09    7.86
  -1   4   4  206.12    5.55
  -1   4   4  215.83    5.75
   1  -4  -4  208.83    5.61
   1  -4  -4  216.95    5.75
  -1   4   3 1838.65   69.28
  -1   4   3 1792.42   67.56
   1  -4  -3 1748.83   65.91
   1  -4  -3 1878.28   70.73
  -1   4   3 1797.05   44.65
  -1   4   3 1861.77   46.16
   1  -4  -3 1854.50   45.97
   1  -4  -3 1891.49   46.89
  -1   4   2 3864.87  145.30
  -1   4   2 3895.91  146.48
   1  -4  -2 3895.91  146.48
   1  -4  -2 3935.54  147.94
  -1   4   2 3924.31   96.89
  -1   4   2 4006.20   98.87
   1  -4  -2 3928.93   97.02
   1  -4  -2 3954.69   97.61
  -1   4   1   18.43    1.12
  -1   4   1   17.63    1.12
   1  -4  -1   20.21    1.12
   1  -4  -1   20.94    1.19
  -1   4   1   21.40    1.06
  -1   4   1   20.08    0.99
   1  -4  -1   19.95    1.06
   1  -4  -1   20.08    0.99
  -1   4   0   10.30    0.86
  -1   4   0    9.44    0.79
   1  -4   0   11.43    0.86
   1  -4   0   10.90    0.86
  -1   4   0    8.92    0.86
  -1   4   0   11.56    0.79
   1  -4   0    9.51    0.86
   1  -4   0    9.77    0.79
  -1   4  -1   19.81    1.12
  -1   4  -1   21.07    1.12
   1  -4   1   18.10    1.06
   1  -4   1   21.20    1.19
  -1   4  -1   17.50    0.99
  -1   4  -1   19.81    0.99
   1  -4   1   18.76    1.06
   1  -4   1   18.23    0.92
  -1   4  -2 1109.53   41.87
  -1   4  -2 1130.67   42.66
   1  -4   2 1142.55   43.13
   1  -4   2 1130.67   42.66
  -1   4  -2 1124.06   28.07
  -1   4  -2 1135.95   28.27
   1  -4   2 1124.06   28.00
   1  -4   2 1131.33   28.27
  -1   4  -3  463.23   17.63
  -1   4  -3  474.52   18.03
   1  -4   3  480.07   18.23
   1  -4   3  483.24   18.36
  -1   4  -3  476.44   12.15
  -1   4  -3  474.92   12.09
   1  -4   3  483.31   12.35
   1  -4   3  459.53   11.69
  -1   4  -4  177.59    6.93
  -1   4  -4  191.46    7.40
   1  -4   4  179.77    7.00
   1  -4   4  179.51    7.00
  -1   4  -4  190.93    5.22
  -1   4  -4  185.65    5.02
   1  -4   4  195.09    5.28
   1  -4   4  184.00    4.95
   1  -4   5    2.64    0.53
   1  -4   5    2.11    0.53
  -1   4  -5    0.53    0.73
  -1   4  -5    2.58    0.66
   1  -4   5    2.84    0.73
   1  -4   5    1.78    0.66
   1  -4   6    9.05    0.73
   1  -4   6    9.77    0.73
  -1   4  -6    7.53    0.86
  -1   4  -6    9.97    0.86
   1  -4   6   10.30    0.86
   1  -4   6   10.57    0.92
   1  -4   7  385.17   14.66
   1  -4   7  429.15   16.31
  -1   4  -7  415.41   10.77
  -1   4  -7  413.30   10.63
   1  -4   7  411.12   10.57
   1  -4   7  409.40   10.63
   1  -4   8   12.48    0.79
   1  -4   8   12.81    0.86
  -1   4  -8   15.98    1.12
  -1   4  -8   14.13    0.92
   1  -4   8   14.60    0.99
   1  -4   8   17.11    1.06
  -1   4  -9  203.81    7.86
  -1   4  -9  194.50    7.53
   1  -4   9  179.97    6.93
   1  -4   9  178.98    6.93
  -1   4  -9  207.64    5.81
  -1   4  -9  194.56    5.35
   1  -4   9  200.57    5.55
   1  -4   9  191.99    5.28
  -1   4 -10    6.41    0.53
  -1   4 -10    6.41    0.53
   1  -4  10    6.74    0.53
   1  -4  10    6.21    0.53
  -1   4 -10    9.31    0.99
  -1   4 -10    8.26    0.86
   1  -4  10    8.06    0.86
   1  -4  10    8.92    0.92
  -1   4 -11    8.06    0.53
  -1   4 -11    8.32    0.59
   1  -4  11    8.59    0.59
   1  -4  11    7.79    0.53
  -1   4 -12   41.34    1.92
  -1   4 -12   46.43    1.92
   1  -4  12   49.73    1.98
   1  -4  12   47.68    1.98
  -1   4 -13   19.68    1.45
  -1   4 -13   21.73    1.39
   1  -4  13   18.29    1.25
  -1   4 -14    9.05    1.12
  -1   4 -14    9.44    1.06
   1  -4  14    7.66    0.92
   1  -4  14    9.44    1.12
  -1   4 -15   16.58    1.25
  -1   4 -15   14.46    1.39
   1  -4  15   18.16    1.39
   1  -4  15   15.52    1.19
  -1   4 -16   26.29    1.59
  -1   4 -16   25.69    1.72
   1  -4  16   25.82    1.52
   1  -4  16   28.27    1.72
  -1   4 -17    3.10    0.92
  -1   4 -17    4.29    1.12
   1  -4  17    7.60    1.06
   1  -4  17    5.61    0.92
  -1   4 -18    9.25    1.19
  -1   4 -18    8.59    1.32
   1  -4  18   10.24    1.25
   1  -4  18   11.89    1.19
  -1   4 -19    2.77    1.19
  -1   4 -19    5.88    1.12
   1  -4  19    4.36    0.99
   1  -4  19    4.62    1.12
  -1   4 -20    4.95    1.19
  -1   4 -20    3.43    1.06
   1  -4  20    2.44    0.99
   1  -4  20    5.15    1.12
  -1   4 -22    3.76    1.32
  -1   4 -22    2.25    1.06
   1  -4  22    4.49    1.12
   1  -4  22    3.24    0.99
  -1   3  24    1.52    1.06
  -1   3  24    1.45    1.12
   1  -3 -24    0.86    0.99
   1  -3 -24    1.52    1.12
  -1   3  23    0.66    0.92
  -1   3  23   -2.71    0.99
   1  -3 -23    0.00    0.99
   1  -3 -23    0.66    1.06
  -1   3  22   -0.59    0.92
   1  -3 -22   -0.07    1.06
  -1   3  21    3.30    1.06
  -1   3  21    1.72    0.99
   1  -3 -21    2.84    0.99
   1  -3 -21    2.38    1.12
  -1   3  20    2.05    0.40
  -1   3  20    2.97    1.06
  -1   3  20    1.72    0.99
   1  -3 -20    2.25    1.06
   1  -3 -20    4.16    0.99
  -1   3  19    6.27    0.66
  -1   3  19    5.81    0.66
   1  -3 -19    5.28    0.66
   1  -3 -19    4.95    0.53
  -1   3  19    3.37    0.99
  -1   3  19    5.48    1.06
   1  -3 -19    4.42    1.12
   1  -3 -19    6.21    1.06
  -1   3  18    1.12    0.53
  -1   3  18    0.79    0.53
   1  -3 -18    0.66    0.59
   1  -3 -18    1.59    0.53
  -1   3  18    3.17    0.99
  -1   3  18    1.59    0.92
   1  -3 -18    0.07    0.99
   1  -3 -18    1.78    0.86
  -1   3  17   12.94    0.99
  -1   3  17   11.82    0.99
   1  -3 -17   13.14    0.92
   1  -3 -17   13.08    0.99
  -1   3  17   13.60    1.25
  -1   3  17   12.22    1.25
   1  -3 -17   11.16    1.25
   1  -3 -17   13.01    1.25
  -1   3  16   11.82    0.99
  -1   3  16   15.19    1.06
   1  -3 -16   12.48    0.92
   1  -3 -16   13.27    0.99
  -1   3  16   13.34    1.32
   1  -3 -16   16.78    1.32
   1  -3 -16   12.75    1.25
  -1   3  15    1.45    0.53
  -1   3  15    0.86    0.59
   1  -3 -15    0.00    0.53
   1  -3 -15    0.33    0.33
  -1   3  15    0.40    0.79
  -1   3  15    1.12    0.86
   1  -3 -15    1.12    0.79
   1  -3 -15    2.25    0.79
  -1   3  14   47.29    2.11
  -1   3  14   49.93    2.11
   1  -3 -14   50.26    2.11
   1  -3 -14   46.36    2.05
  -1   3  13   33.35    1.78
  -1   3  13   37.05    1.78
   1  -3 -13   39.96    1.85
  -1   3  12    0.00    0.53
  -1   3  12   -0.79    0.59
   1  -3 -12    0.33    0.26
   1  -3 -12   -0.07    0.46
  -1   3  12    0.40    0.92
   1  -3 -12   -0.40    0.79
  -1   3  11   75.42    3.17
  -1   3  11   86.91    3.57
  -1   3  11   78.00    2.64
  -1   3  11   78.00    2.64
   1  -3 -11   76.41    2.58
   1  -3 -11   76.08    2.58
  -1   3  10  148.53    4.29
  -1   3  10  149.06    4.36
   1  -3 -10  140.61    4.09
   1  -3 -10  149.65    4.29
  -1   3   9   50.59    2.25
  -1   3   9   52.57    2.25
  -1   3   9   46.49    1.85
  -1   3   9   51.05    1.92
   1  -3  -9   51.25    1.92
   1  -3  -9   49.73    1.85
  -1   3   8  548.62   20.87
  -1   3   8  540.63   20.54
  -1   3   8  549.35   14.07
  -1   3   8  539.25   13.80
   1  -3  -8  525.31   13.41
   1  -3  -8  540.24   13.80
  -1   3   7    3.10    0.59
  -1   3   7    3.57    0.66
   1  -3  -7    2.97    0.53
   1  -3  -7    2.25    0.59
  -1   3   7    4.36    0.79
  -1   3   7    2.31    0.73
   1  -3  -7    2.25    0.73
   1  -3  -7    3.43    0.73
  -1   3   6  103.75    4.16
  -1   3   6  102.90    4.09
   1  -3  -6  103.89    4.16
   1  -3  -6  102.50    4.09
  -1   3   6  103.09    3.04
  -1   3   6   96.49    2.91
   1  -3  -6   99.79    2.91
   1  -3  -6  102.63    3.04
  -1   3   5    3.17    0.59
  -1   3   5    2.84    0.59
   1  -3  -5    3.17    0.59
   1  -3  -5    1.59    0.59
  -1   3   5    3.50    0.73
  -1   3   5    3.90    0.66
   1  -3  -5    4.49    0.73
   1  -3  -5    3.96    0.73
   1  -3  -4   14.13    0.92
   1  -3  -4   12.48    0.86
   1  -3  -4    9.84    0.79
   1  -3  -4   10.77    0.86
  -1   3   3  589.17   22.32
  -1   3   3  585.74   22.19
   1  -3  -3  580.92   21.99
   1  -3  -3  573.52   21.73
  -1   3   3  582.50   14.66
  -1   3   3  580.72   14.60
   1  -3  -3  581.12   14.66
   1  -3  -3  588.78   14.79
  -1   3   2  139.62    5.48
  -1   3   2  137.77    5.42
   1  -3  -2  142.06    5.55
   1  -3  -2  141.20    5.55
  -1   3   2  138.63    3.76
  -1   3   2  139.42    3.76
   1  -3  -2  136.51    3.70
   1  -3  -2  141.53    3.83
  -1   3   1  263.98   10.10
  -1   3   1  269.39   10.30
   1  -3  -1  263.12   10.10
   1  -3  -1  279.76   10.70
  -1   3   1  259.22    6.74
  -1   3   1  263.18    6.80
   1  -3  -1  268.34    6.87
   1  -3  -1  270.25    7.00
  -1   3   0 1614.11   60.76
  -1   3   0 1670.24   62.87
   1  -3   0 1726.38   64.99
   1  -3   0 1582.40   59.57
  -1   3   0 1639.86   40.62
  -1   3   0 1657.03   41.01
   1  -3   0 1681.47   41.67
   1  -3   0 1655.05   40.95
  -1   3  -1  801.11   30.25
  -1   3  -1  806.39   30.45
   1  -3   1  802.43   30.31
   1  -3   1  819.60   30.91
  -1   3  -1  802.43   20.01
  -1   3  -1  794.50   19.88
   1  -3   1  798.47   19.95
   1  -3   1  796.49   19.88
  -1   3  -2  290.26   11.10
  -1   3  -2  293.43   11.23
   1  -3   2  293.37   11.23
   1  -3   2  286.89   10.96
  -1   3  -2  304.13    7.86
  -1   3  -2  308.62    7.93
   1  -3   2  304.53    7.79
   1  -3   2  306.64    7.93
  -1   3  -3   38.11    1.65
  -1   3  -3   36.52    1.65
   1  -3   3   38.04    1.65
   1  -3   3   37.38    1.65
  -1   3  -3   35.73    1.32
  -1   3  -3   33.48    1.39
   1  -3   3   35.07    1.32
   1  -3   3   37.64    1.45
  -1   3  -4    0.66    0.46
  -1   3  -4    1.92    0.46
   1  -3   4    1.45    0.46
   1  -3   4    0.46    0.46
  -1   3  -4    0.00    0.66
  -1   3  -4    0.73    0.59
   1  -3   4    0.33    0.59
   1  -3   4    2.31    0.73
   1  -3   5  231.81    8.85
   1  -3   5  223.03    8.52
  -1   3  -5  223.43    5.88
  -1   3  -5  217.09    5.81
   1  -3   5  220.92    5.88
   1  -3   5  221.05    5.81
   1  -3   6  232.28    8.92
   1  -3   6  226.79    8.65
  -1   3  -6  246.08    6.47
  -1   3  -6  245.95    6.54
   1  -3   6  245.09    6.41
   1  -3   6  244.56    6.47
   1  -3   7    7.13    0.53
   1  -3   7    7.40    0.53
  -1   3  -7    7.99    0.92
  -1   3  -7    7.99    0.73
   1  -3   7    6.67    0.79
   1  -3   7    7.20    0.79
   1  -3   8  213.65    8.19
   1  -3   8  209.62    7.99
  -1   3  -8  226.73    6.14
  -1   3  -8  231.95    6.21
   1  -3   8  218.34    5.88
   1  -3   8  225.87    6.14
  -1   3  -9   34.47    1.45
  -1   3  -9   34.01    1.45
   1  -3   9   33.02    1.39
   1  -3   9   30.25    1.32
  -1   3  -9   37.98    1.65
  -1   3  -9   36.59    1.52
   1  -3   9   36.72    1.59
   1  -3   9   36.65    1.52
   1  -3  10   11.69    0.59
  -1   3 -10   13.14    0.99
  -1   3 -10   14.66    1.06
   1  -3  10   11.16    1.06
   1  -3  10   11.56    0.99
  -1   3 -11  122.78    3.76
   1  -3  11  118.35    3.57
  -1   3 -12    7.86    0.92
   1  -3  12    8.32    1.06
  -1   3 -13    7.13    0.99
  -1   3 -13    5.81    0.86
   1  -3  13    7.13    0.99
   1  -3  13    4.62    0.79
  -1   3 -14    2.38    0.92
  -1   3 -14    1.78    0.79
   1  -3  14    1.39    0.92
  -1   3 -15   32.76    1.85
  -1   3 -15   34.87    1.78
   1  -3  15   37.98    1.78
   1  -3  15   35.60    1.85
  -1   3 -16   -0.53    0.86
  -1   3 -16   -0.46    0.92
   1  -3  16    0.00    0.86
   1  -3  16    0.40    0.79
  -1   3 -17    2.97    1.06
  -1   3 -17    3.96    0.92
   1  -3  17    3.17    0.99
   1  -3  17    2.18    0.79
  -1   3 -18   96.36    3.57
  -1   3 -18   98.40    3.50
   1  -3  18  102.50    3.57
   1  -3  18  102.04    3.50
  -1   3 -19    1.78    0.99
  -1   3 -19   -1.59    1.06
   1  -3  19    0.53    0.92
   1  -3  19    0.99    0.86
  -1   3 -20   -0.26    0.92
  -1   3 -20   -0.07    1.06
   1  -3  20   -0.40    0.86
   1  -3  20    0.20    0.92
  -1   3 -21    0.59    1.06
   1  -3  21    2.71    1.06
   1  -3  21    2.84    0.92
  -1   3 -22   -0.33    1.06
  -1   3 -22    1.12    1.06
   1  -3  22    0.53    0.86
   1  -3  22   -0.53    0.92
  -1   3 -23    4.16    1.32
  -1   3 -23    2.31    1.12
   1  -3  23    4.95    1.12
   1  -3  23    6.93    1.12
  -1   2  24    9.38    1.32
  -1   2  24   11.10    1.45
   1  -2 -23    1.12    0.99
  -1   2  22    0.99    0.99
  -1   2  22   -0.20    0.92
   1  -2 -22    1.85    1.12
   1  -2 -22   -0.46    0.92
  -1   2  21   -0.92    0.86
  -1   2  21    0.20    0.92
   1  -2 -21    0.00    1.06
   1  -2 -21   -0.13    0.92
  -1   2  20    3.43    1.06
  -1   2  20    3.90    1.06
   1  -2 -20    7.33    1.19
   1  -2 -20    3.83    1.12
  -1   2  19    0.92    0.92
  -1   2  19    0.20    0.92
   1  -2 -19    0.86    0.92
   1  -2 -19    2.64    0.99
  -1   2  18   97.28    3.43
  -1   2  18   95.83    3.43
   1  -2 -18   94.11    3.37
   1  -2 -18   91.93    3.50
   1  -2 -17   27.87    1.25
   1  -2 -17   28.99    1.32
  -1   2  17   28.73    1.72
  -1   2  17   26.42    1.59
   1  -2 -17   25.36    1.65
   1  -2 -17   25.62    1.65
  -1   2  16    7.40    0.73
  -1   2  16    7.79    0.66
   1  -2 -16    5.94    0.66
   1  -2 -16    6.80    0.59
  -1   2  16    8.59    1.12
  -1   2  16    6.41    1.06
   1  -2 -16    7.33    1.12
   1  -2 -16    6.74    0.99
  -1   2  15   22.85    1.25
  -1   2  15   26.42    1.32
   1  -2 -15   22.72    1.19
   1  -2 -15   22.06    1.19
  -1   2  15   26.02    1.59
  -1   2  15   21.66    1.52
   1  -2 -15   21.73    1.52
   1  -2 -15   24.77    1.52
  -1   2  14   15.32    0.99
  -1   2  14   14.33    0.86
   1  -2 -14   15.45    0.92
   1  -2 -14   13.80    0.92
  -1   2  14   13.94    1.19
  -1   2  14   14.93    1.19
   1  -2 -14   14.93    1.19
   1  -2 -14   15.39    1.25
  -1   2  13   57.00    2.44
  -1   2  13   50.66    2.25
   1  -2 -13   53.56    2.31
   1  -2 -13   51.51    2.25
  -1   2  12  476.31   18.16
  -1   2  12  463.96   17.70
  -1   2  12  476.17   12.42
  -1   2  12  484.56   12.61
   1  -2 -12  493.74   12.88
   1  -2 -12  464.48   12.09
  -1   2  11   74.83    3.10
  -1   2  11   69.41    2.91
  -1   2  11   71.66    2.44
  -1   2  11   72.19    2.44
   1  -2 -11   72.38    2.44
   1  -2 -11   78.66    2.64
  -1   2  10   21.60    1.19
  -1   2  10   25.16    1.25
  -1   2  10   26.29    1.32
  -1   2  10   26.15    1.39
   1  -2 -10   24.11    1.32
   1  -2 -10   26.68    1.39
  -1   2   9  105.41    4.16
  -1   2   9  105.21    4.16
  -1   2   9  102.70    3.10
  -1   2   9  103.03    3.10
   1  -2  -9  106.00    3.24
   1  -2  -9  100.72    3.04
  -1   2   8    3.24    0.53
  -1   2   8    1.98    0.53
  -1   2   8    2.97    0.73
  -1   2   8    1.85    0.73
   1  -2  -8    2.58    0.73
   1  -2  -8    2.64    0.73
  -1   2   7  719.21   27.21
  -1   2   7  709.31   26.81
   1  -2  -7  736.39   27.80
   1  -2  -7  716.57   27.08
  -1   2   7  735.07   18.49
  -1   2   7  731.76   18.43
   1  -2  -7  704.02   17.70
   1  -2  -7  729.78   18.36
  -1   2   6  568.17   21.53
  -1   2   6  574.71   21.73
   1  -2  -6  577.29   21.86
   1  -2  -6  593.07   22.45
  -1   2   6  572.86   14.46
  -1   2   6  567.51   14.33
   1  -2  -6  574.38   14.53
   1  -2  -6  563.29   14.27
  -1   2   5  650.27   24.57
  -1   2   5  617.84   23.38
   1  -2  -5  664.40   25.16
   1  -2  -5  618.63   23.38
  -1   2   5  615.72   15.45
  -1   2   5  619.42   15.59
   1  -2  -5  621.27   15.59
   1  -2  -5  614.73   15.45
  -1   2   4  105.67    4.16
  -1   2   4  102.63    4.03
   1  -2  -4  103.82    4.09
   1  -2  -4  108.05    4.23
  -1   2   4  104.75    2.91
  -1   2   4  108.64    3.04
   1  -2  -4  104.35    2.91
   1  -2  -4  104.35    2.91
  -1   2   3   19.28    0.99
  -1   2   3   21.46    1.06
   1  -2  -3   20.54    1.06
   1  -2  -3   23.38    1.12
   1  -2  -3   21.46    0.92
   1  -2  -3   23.58    0.99
  -1   2   2 2258.03   84.93
  -1   2   2 2287.75   86.05
   1  -2  -2 2347.85   88.30
   1  -2  -2 2287.75   86.05
  -1   2   2 2290.39   56.53
  -1   2   2 2297.66   56.73
   1  -2  -2 2344.55   57.85
   1  -2  -2 2386.15   58.91
  -1   2   1  328.90   12.48
  -1   2   1  312.25   11.89
   1  -2  -1  329.36   12.48
   1  -2  -1  345.94   13.14
  -1   2   1  335.57    8.45
  -1   2   1  325.20    8.26
   1  -2  -1  340.39    8.59
   1  -2  -1  345.28    8.72
  -1   2   0 1806.95   67.96
  -1   2   0 1865.73   70.20
   1  -2   0 1906.02   71.66
   1  -2   0 1851.20   69.61
  -1   2   0 1750.82   43.26
  -1   2   0 1848.56   45.64
   1  -2   0 1888.19   46.63
   1  -2   0 1816.20   44.84
  -1   2  -1  241.72    9.25
  -1   2  -1  250.11    9.51
   1  -2   1  256.98    9.77
   1  -2   1  252.55    9.64
  -1   2  -1  244.49    6.27
  -1   2  -1  242.18    6.21
   1  -2   1  244.16    6.27
   1  -2   1  245.81    6.27
  -1   2  -2  360.80   13.67
  -1   2  -2  343.10   13.01
   1  -2   2  367.07   13.94
   1  -2   2  359.08   13.60
  -1   2  -2  365.68    9.25
  -1   2  -2  375.39    9.51
   1  -2   2  368.19    9.31
   1  -2   2  377.11    9.51
  -1   2  -3 4920.25  184.86
  -1   2  -3 4844.96  182.02
   1  -2   3 4734.00  177.92
   1  -2   3 4940.06  185.65
  -1   2  -3 4772.97  117.62
  -1   2  -3 4776.93  117.76
   1  -2   3 4752.50  117.16
   1  -2   3 4755.14  117.23
  -1   2  -4  278.77   10.57
  -1   2  -4  289.40   10.96
   1  -2   4  280.55   10.63
   1  -2   4  278.37   10.57
  -1   2  -4  290.06    7.46
  -1   2  -4  296.87    7.66
   1  -2   4  289.93    7.46
   1  -2   4  294.88    7.53
  -1   2  -5  265.89   10.10
  -1   2  -5  264.31   10.04
   1  -2   5  263.12    9.97
   1  -2   5  278.51   10.57
  -1   2  -5  265.83    6.93
  -1   2  -5  263.32    6.80
   1  -2   5  268.73    6.93
   1  -2   5  260.54    6.80
   1  -2   6  243.11    9.25
   1  -2   6  260.67    9.91
  -1   2  -6  256.45    6.74
  -1   2  -6  250.44    6.54
   1  -2   6  249.45    6.54
   1  -2   6  260.81    6.87
   1  -2   7  254.40    9.64
   1  -2   7  263.32    9.97
  -1   2  -7  267.08    7.00
  -1   2  -7  269.06    7.13
   1  -2   7  270.05    7.07
   1  -2   7  275.60    7.26
  -1   2  -8   18.62    0.86
  -1   2  -8   19.75    0.86
  -1   2  -8   20.54    1.19
  -1   2  -8   19.09    1.06
   1  -2   8   20.28    1.12
   1  -2   8   21.33    1.12
  -1   2  -9  191.53    5.28
  -1   2  -9  186.90    5.09
   1  -2   9  192.25    5.35
   1  -2   9  196.22    5.35
  -1   2 -10   75.29    2.51
  -1   2 -10   69.28    2.38
   1  -2  10   70.40    2.31
   1  -2  10   69.41    2.38
  -1   2 -11   28.46    1.39
  -1   2 -11   26.88    1.45
   1  -2  11   28.46    1.39
   1  -2  11   27.34    1.45
  -1   2 -13    9.91    1.06
  -1   2 -13   10.77    1.12
   1  -2  13   11.69    1.12
   1  -2  13   12.42    0.99
  -1   2 -14   19.22    1.39
  -1   2 -14   17.11    1.25
   1  -2  14   19.55    1.25
   1  -2  14   18.76    1.39
  -1   2 -15  134.46    4.29
  -1   2 -15  128.26    4.03
   1  -2  15  128.59    4.09
   1  -2  15  129.64    4.03
  -1   2 -16    3.96    1.06
  -1   2 -16    3.70    0.99
   1  -2  16    6.14    0.92
   1  -2  16    4.69    0.99
  -1   2 -17   -0.33    0.79
  -1   2 -17    0.13    0.92
   1  -2  17   -0.07    0.73
   1  -2  17    0.73    0.86
  -1   2 -18    9.18    1.19
  -1   2 -18    8.19    1.25
   1  -2  18    6.54    1.06
   1  -2  18    8.59    1.06
  -1   2 -19    5.61    1.06
  -1   2 -19    3.10    1.19
   1  -2  19    5.61    1.06
   1  -2  19    5.94    0.99
  -1   2 -20    4.62    1.19
  -1   2 -20    4.23    1.06
   1  -2  20    3.63    0.92
   1  -2  20    4.89    1.06
  -1   2 -21    0.99    1.06
  -1   2 -21    0.66    1.06
   1  -2  21    1.52    0.99
   1  -2  21    3.70    0.99
  -1   2 -22   -1.06    1.06
   1  -2  22    0.53    0.79
   1  -2  22   -0.13    0.99
  -1   2 -23    1.72    1.12
  -1   2 -23   -0.33    1.06
   1  -2  23    1.25    0.99
   1  -2  23   -0.79    0.86
  -1   1  24    2.97    1.12
  -1   1  24    3.57    1.06
   1  -1 -24    3.63    1.19
   1  -1 -24    3.83    1.19
  -1   1  22    0.66    0.99
  -1   1  22   -0.46    0.92
   1  -1 -22    2.97    1.12
   1  -1 -22   -0.33    1.06
  -1   1  21    7.73    1.12
  -1   1  21    7.73    1.19
   1  -1 -21    7.07    1.19
   1  -1 -21    8.19    1.39
  -1   1  20    0.53    0.92
  -1   1  20    0.79    0.92
   1  -1 -20    1.45    0.99
   1  -1 -20    1.59    1.12
  -1   1  19   13.67    1.32
  -1   1  19   13.41    1.25
   1  -1 -19   13.14    1.32
   1  -1 -19   15.72    1.45
  -1   1  18   80.51    3.04
  -1   1  18   75.49    2.91
   1  -1 -18   74.17    2.91
   1  -1 -18   77.93    3.10
  -1   1  17   50.06    2.18
  -1   1  17   48.08    2.18
   1  -1 -17   49.80    2.18
   1  -1 -17   48.67    2.25
  -1   1  16    3.37    0.92
  -1   1  16    3.10    0.86
   1  -1 -16    2.77    0.86
   1  -1 -16    2.77    0.92
  -1   1  15   47.16    1.92
   1  -1 -15   45.57    1.85
   1  -1 -15   49.66    1.98
   1  -1 -15   48.15    2.18
   1  -1 -15   45.37    2.05
  -1   1  14   17.77    0.92
  -1   1  14   18.03    0.92
   1  -1 -14   16.18    0.86
   1  -1 -14   18.03    0.86
  -1   1  14   16.05    1.39
   1  -1 -14   16.31    1.25
  -1   1  13  160.42    6.21
  -1   1  13  169.67    6.54
   1  -1 -13  162.67    6.27
   1  -1 -13  151.44    5.81
  -1   1  13  159.50    4.69
  -1   1  13  169.86    4.89
   1  -1 -13  170.79    5.02
  -1   1  12  696.10   26.29
  -1   1  12  687.51   26.02
   1  -1 -12  667.04   25.23
   1  -1 -12  680.25   25.69
  -1   1  12  696.76   17.77
  -1   1  12  717.23   18.29
   1  -1 -12  689.50   17.70
   1  -1 -12  682.23   17.44
   1  -1 -11   69.28    2.77
   1  -1 -11   68.36    2.71
  -1   1  11   69.61    2.38
  -1   1  11   69.28    2.31
   1  -1 -11   70.07    2.38
   1  -1 -11   66.51    2.38
  -1   1  10 2122.64   79.91
  -1   1  10 2115.38   79.65
   1  -1 -10 2101.51   79.12
   1  -1 -10 2083.68   78.39
  -1   1  10 2049.99   50.92
  -1   1  10 2025.56   50.33
   1  -1 -10 1970.08   49.00
   1  -1 -10 2049.99   50.99
  -1   1   9   37.05    1.59
  -1   1   9   36.52    1.59
   1  -1  -9   33.35    1.52
   1  -1  -9   30.05    1.39
  -1   1   9   35.93    1.45
  -1   1   9   36.72    1.52
   1  -1  -9   34.21    1.45
   1  -1  -9   34.74    1.45
   1  -1  -8  179.04    6.87
   1  -1  -8  170.19    6.54
  -1   1   8  175.94    4.82
  -1   1   8  169.27    4.62
   1  -1  -8  173.83    4.76
   1  -1  -8  171.25    4.69
  -1   1   7  188.49    7.20
  -1   1   7  191.20    7.33
   1  -1  -7  194.63    7.46
   1  -1  -7  192.52    7.40
  -1   1   7  194.76    5.22
  -1   1   7  188.09    5.02
   1  -1  -7  196.35    5.22
   1  -1  -7  188.42    5.02
  -1   1   6 1688.73   63.53
  -1   1   6 1655.71   62.28
   1  -1  -6 1707.89   64.26
   1  -1  -6 1683.45   63.34
  -1   1   6 1612.78   39.96
  -1   1   6 1671.56   41.41
   1  -1  -6 1601.56   39.69
   1  -1  -6 1608.82   39.89
  -1   1   5   86.65    3.43
  -1   1   5   83.81    3.30
   1  -1  -5   80.44    3.17
   1  -1  -5   87.97    3.43
  -1   1   5   82.55    2.38
  -1   1   5   82.88    2.38
   1  -1  -5   77.80    2.25
   1  -1  -5   81.83    2.38
  -1   1   4   46.76    1.92
  -1   1   4   44.78    1.85
   1  -1  -4   40.29    1.65
   1  -1  -4   44.38    1.85
  -1   1   4   42.66    1.39
  -1   1   4   42.99    1.39
   1  -1  -4   43.52    1.39
   1  -1  -4   43.13    1.39
   1  -1  -3    7.60    0.53
   1  -1  -3    7.40    0.53
  -1   1   3    8.98    0.59
  -1   1   3    8.39    0.59
   1  -1  -3    8.12    0.59
   1  -1  -3    7.33    0.59
  -1   1   2   19.22    0.92
  -1   1   2   17.77    0.86
   1  -1  -2   19.48    0.92
   1  -1  -2   18.76    0.86
  -1   1   2   18.69    0.66
  -1   1   2   18.89    0.73
   1  -1  -2   18.43    0.73
   1  -1  -2   19.09    0.73
  -1   1   1  796.49   29.98
  -1   1   1  797.15   30.05
   1  -1  -1  811.02   30.51
   1  -1  -1  774.03   29.19
  -1   1   1  791.86   19.61
  -1   1   1  790.54   19.55
   1  -1  -1  806.39   20.01
   1  -1  -1  786.58   19.48
  -1   1   0   91.54    3.57
  -1   1   0   88.30    3.43
   1  -1   0   88.89    3.43
   1  -1   0   88.76    3.43
  -1   1   0   96.75    2.51
  -1   1   0   95.63    2.51
   1  -1   0   98.80    2.58
   1  -1   0   92.46    2.44
  -1   1  -1 1433.15   53.89
  -1   1  -1 1380.31   51.91
   1  -1   1 1446.35   54.42
   1  -1   1 1395.50   52.50
  -1   1  -1 1415.31   35.00
  -1   1  -1 1378.33   34.08
   1  -1   1 1405.41   34.74
   1  -1   1 1404.75   34.74
  -1   1  -2  316.55   11.95
  -1   1  -2  330.88   12.55
   1  -1   2  317.74   12.02
   1  -1   2  321.96   12.15
  -1   1  -2  326.06    8.26
  -1   1  -2  312.19    7.86
   1  -1   2  314.76    7.93
   1  -1   2  316.08    7.99
  -1   1  -3  621.14   23.38
  -1   1  -3  640.89   24.17
   1  -1   3  644.78   24.30
   1  -1   3  689.50   25.96
  -1   1  -3  658.06   16.38
  -1   1  -3  646.90   16.18
   1  -1   3  645.31   16.11
   1  -1   3  659.12   16.44
  -1   1  -4 1729.68   42.86
  -1   1  -4 1690.72   41.81
   1  -1   4 1686.09   41.74
   1  -1   4 1723.74   42.66
  -1   1  -5  259.68    9.84
  -1   1  -5  254.40    9.64
   1  -1   5  269.46   10.17
   1  -1   5  260.94    9.91
  -1   1  -5  273.62    7.07
  -1   1  -5  279.63    7.26
   1  -1   5  270.51    7.00
   1  -1   5  277.38    7.20
   1  -1   6  410.92   15.52
   1  -1   6  417.66   15.78
  -1   1  -6  406.63   10.43
  -1   1  -6  409.80   10.43
   1  -1   6  416.40   10.63
   1  -1   6  404.85   10.37
  -1   1  -7  615.99   15.52
  -1   1  -7  642.87   16.25
   1  -1   7  637.92   16.18
   1  -1   7  639.90   16.11
  -1   1  -8   79.25    2.51
  -1   1  -8   81.04    2.51
   1  -1   8   81.04    2.58
   1  -1   8   81.43    2.51
  -1   1  -9   18.56    1.06
  -1   1  -9   17.30    1.12
   1  -1   9   16.97    1.12
   1  -1   9   16.38    1.06
  -1   1 -10  586.14   14.93
  -1   1 -10  616.45   15.78
   1  -1  10  610.04   15.65
   1  -1  10  614.67   15.65
  -1   1 -11  375.19    9.84
  -1   1 -11  390.32   10.30
   1  -1  11  387.87   10.17
   1  -1  11  375.13    9.91
  -1   1 -13  407.75   10.90
   1  -1  13  392.03   10.43
   1  -1  13  404.05   10.63
  -1   1 -14    3.10    0.86
  -1   1 -14    2.91    0.86
   1  -1  14    2.77    0.86
   1  -1  14    2.31    0.73
  -1   1 -15   11.23    1.12
  -1   1 -15   12.15    1.19
   1  -1  15    9.77    1.06
  -1   1 -16   99.79    3.50
  -1   1 -16  107.92    3.57
   1  -1  16  111.15    3.70
   1  -1  16  103.42    3.43
  -1   1 -17   15.92    1.32
  -1   1 -17   15.45    1.39
   1  -1  17   17.44    1.39
   1  -1  17   15.39    1.25
  -1   1 -18  213.06    6.21
  -1   1 -18  210.08    6.27
   1  -1  18  203.48    6.01
   1  -1  18  211.87    6.14
  -1   1 -19   -0.79    0.92
  -1   1 -19    0.20    1.06
   1  -1  19   -0.07    0.86
   1  -1  19    0.26    0.79
  -1   1 -20    4.36    1.12
  -1   1 -20    5.28    1.25
   1  -1  20    4.49    1.06
   1  -1  20    4.62    0.99
  -1   1 -21   -0.46    0.99
  -1   1 -21   -1.12    0.99
   1  -1  21    1.52    0.86
   1  -1  21    2.97    0.92
  -1   1 -22    6.27    1.32
   1  -1  22    5.68    1.32
   1  -1  22    5.48    1.06
  -1   1 -23    8.19    1.39
  -1   1 -23    7.00    1.39
   1  -1  23    7.99    1.25
   1  -1  23    8.12    1.12
  -1   1 -24    2.91    1.19
  -1   1 -24    0.26    1.06
   1  -1  24    2.44    0.99
   1  -1  24    1.32    0.99
  -1   0  24    2.11    1.12
  -1   0  24    4.36    1.06
   1   0 -24    3.04    1.25
   1   0 -24    3.37    1.19
  -1   0  23    2.84    1.12
  -1   0  23    1.85    0.92
   1   0 -23    4.03    1.12
  -1   0  22    0.73    0.86
  -1   0  22    1.32    0.99
   1   0 -22    1.32    1.12
   1   0 -22    0.73    1.06
  -1   0  21    1.85    0.92
  -1   0  21    0.99    0.86
   1   0 -21    1.32    0.99
   1   0 -21    1.72    1.12
  -1   0  20    1.92    0.92
  -1   0  20    2.11    0.86
   1   0 -20    1.92    1.06
   1   0 -20    1.25    1.12
  -1   0  19    4.56    0.99
  -1   0  19    6.27    0.99
   1   0 -19    4.29    1.12
   1   0 -19    5.55    1.19
  -1   0  18   34.01    1.85
  -1   0  18   32.76    1.78
   1   0 -18   34.87    1.92
   1   0 -18   30.84    1.92
  -1   0  17   26.02    1.59
  -1   0  17   24.04    1.52
   1   0 -17   22.12    1.52
   1   0 -17   24.96    1.65
  -1   0  16   32.23    1.72
  -1   0  16   34.80    1.78
   1   0 -16   29.92    1.72
   1   0 -16   30.45    1.72
  -1   0  15   92.66    3.10
  -1   0  15   84.87    2.97
   1   0 -15   78.46    2.91
   1   0 -15   84.60    2.97
  -1   0  13   17.83    1.19
  -1   0  13   18.49    1.25
   1   0 -13   18.10    1.25
   1   0 -13   18.89    1.25
  -1   0  12   10.70    0.99
  -1   0  12   10.90    0.92
   1   0 -12   11.62    1.06
   1   0 -12    9.97    0.99
   1   0 -11  281.41   10.70
   1   0 -11  283.79   10.77
  -1   0  11  259.29    7.00
  -1   0  11  258.89    6.93
   1   0 -11  286.03    7.66
   1   0 -11  282.60    7.53
  -1   0  10   91.87    3.57
  -1   0  10   92.99    3.63
   1   0 -10   90.15    3.50
   1   0 -10   88.30    3.43
  -1   0  10   88.37    2.77
  -1   0  10   82.88    2.64
   1   0 -10   86.98    2.77
   1   0 -10   81.10    2.58
  -1   0   9  244.23    9.25
  -1   0   9  251.69    9.58
   1   0  -9  238.95    9.11
   1   0  -9  246.61    9.38
  -1   0   9  241.92    6.41
  -1   0   9  250.11    6.60
   1   0  -9  237.23    6.34
   1   0  -9  243.90    6.47
  -1   0   8  114.59    4.42
  -1   0   8  116.10    4.49
   1   0  -8  115.44    4.42
   1   0  -8  108.91    4.23
  -1   0   8  114.65    3.24
  -1   0   8  112.08    3.24
   1   0  -8  107.39    3.10
   1   0  -8  111.35    3.17
  -1   0   7 1536.83   57.85
  -1   0   7 1433.81   53.96
   1   0  -7 1421.26   53.50
   1   0  -7 1441.07   54.22
  -1   0   7 1466.17   36.39
  -1   0   7 1445.69   35.93
  -1   0   6 1859.13   69.87
  -1   0   6 1769.97   66.57
   1   0  -6 1835.35   69.02
   1   0  -6 1905.36   71.66
  -1   0   6 1779.87   44.05
  -1   0   6 1836.01   45.44
   1   0  -6 1788.46   44.32
   1   0  -6 1837.99   45.50
  -1   0   5  132.88    5.09
  -1   0   5  142.85    5.48
   1   0  -5  130.30    4.95
   1   0  -5  127.07    4.89
  -1   0   5  134.79    3.57
  -1   0   5  133.87    3.57
   1   0  -5  128.72    3.43
   1   0  -5  132.62    3.57
  -1   0   4 1372.39   51.65
  -1   0   4 1395.50   52.50
   1   0  -4 1344.65   50.59
   1   0  -4 1389.56   52.24
  -1   0   4 1372.39   33.95
  -1   0   4 1389.56   34.34
   1   0  -4 1333.42   33.02
   1   0  -4 1355.88   33.55
  -1   0   3   34.47    1.39
  -1   0   3   32.43    1.32
   1   0  -3   30.97    1.25
   1   0  -3   32.43    1.32
  -1   0   3   34.54    1.06
  -1   0   3   34.41    1.06
   1   0  -3   32.89    0.99
   1   0  -3   34.34    1.06
   1   0  -2  399.89   15.12
   1   0  -2  393.09   14.86
  -1   0   2  401.48    9.97
  -1   0   2  401.41    9.97
   1   0  -2  397.85    9.91
   1   0  -2  393.36    9.77
  -1   0   1  830.17   31.24
  -1   0   1  843.38   31.70
   1   0  -1  855.26   32.16
   1   0  -1  833.47   31.37
  -1   0   1  777.99   19.22
  -1   0   1  782.62   19.28
   1   0  -1  789.22   19.48
   1   0  -1  774.69   19.09
  -1   0   0  572.47   21.53
  -1   0   0  575.37   21.66
   1   0   0  564.94   21.27
   1   0   0  559.19   21.07
  -1   0   0  579.14   14.33
  -1   0   0  587.52   14.53
   1   0   0  571.08   14.13
   1   0   0  588.91   14.53
  -1   0  -1   28.93    1.19
  -1   0  -1   27.87    1.12
   1   0   1   30.25    1.19
   1   0   1   27.21    1.12
  -1   0  -1   32.30    0.92
  -1   0  -1   31.17    0.92
   1   0   1   31.04    0.92
   1   0   1   31.57    0.92
  -1   0  -2 2099.53   78.92
  -1   0  -2 2297.66   86.32
   1   0   2 2273.22   85.46
   1   0   2 2254.07   84.73
  -1   0  -2 2384.83   58.84
  -1   0  -2 2372.29   58.51
   1   0   2 2376.25   58.58
   1   0   2 2382.85   58.78
  -1   0  -3  215.37    8.19
  -1   0  -3  212.33    8.06
   1   0   3  213.98    8.12
   1   0   3  219.93    8.32
  -1   0  -3  222.37    5.68
  -1   0  -3  227.45    5.81
   1   0   3  221.51    5.68
   1   0   3  226.33    5.81
  -1   0  -4 2494.47   93.78
  -1   0  -4 2427.10   91.27
   1   0   4 2634.48   99.07
   1   0   4 2502.39   94.05
  -1   0  -4 2495.13   61.62
  -1   0  -4 2543.34   62.81
   1   0   4 2606.74   64.39
   1   0   4 2577.68   63.67
  -1   0  -5  737.05   27.80
  -1   0  -5  797.15   30.05
   1   0   5  820.26   30.91
   1   0   5  798.47   30.05
  -1   0  -5  810.35   20.21
  -1   0  -5  817.62   20.47
   1   0   5  806.39   20.14
   1   0   5  824.88   20.61
  -1   0  -6  688.83   25.96
  -1   0  -6  646.70   24.37
   1   0   6  694.12   26.15
   1   0   6  677.61   25.56
  -1   0  -6  669.02   16.84
  -1   0  -6  657.93   16.51
   1   0   6  663.08   16.64
   1   0   6  667.04   16.84
  -1   0  -7  778.65   29.39
  -1   0  -7  785.26   29.65
  -1   0  -7  805.73   20.28
  -1   0  -7  793.84   19.88
   1   0   7  813.66   20.47
   1   0   7  809.03   20.34
  -1   0  -8 1073.21   26.88
  -1   0  -8 1027.64   25.69
   1   0   8 1061.32   26.62
   1   0   8 1087.74   27.21
  -1   0  -9  218.80    5.94
  -1   0  -9  203.35    5.55
   1   0   9  210.81    5.75
   1   0   9  206.52    5.68
  -1   0 -10   79.78    2.64
  -1   0 -10   78.00    2.58
  -1   0 -11  143.05    4.23
  -1   0 -11  132.29    3.90
   1   0  11  137.37    4.09
   1   0  11  140.28    4.09
  -1   0 -13  755.54   19.35
  -1   0 -13  729.12   18.62
   1   0  13  740.35   18.89
   1   0  13  717.89   18.36
  -1   0 -14    1.06    0.79
  -1   0 -14    0.13    0.86
   1   0  14    1.98    0.86
   1   0  14    1.85    0.79
  -1   0 -15  289.54    7.99
  -1   0 -15  280.69    7.86
   1   0  15  280.55    7.79
   1   0  15  270.05    7.46
  -1   0 -16    0.86    0.86
  -1   0 -16    2.05    0.92
   1   0  16    0.00    0.86
  -1   0 -17   70.60    2.77
[truncated: 3,769,521 more chars]
