# Supplementary material for: Investigating the Conformations of a Family of [M2L3]4+ Helicates Using Single Crystal X-ray Diffraction
Source: Molecules. 2023 Feb 1;28(3):1404. doi: 10.3390/molecules28031404 (PMC9921459; doi:10.3390/molecules28031404)
Supplement: Supplementary file 1 [file molecules-28-01404-s001.zip › Final cifs/2224287.cif]

####################################################################### 
# 
# This file contains crystal structure data downloaded from the 
# Cambridge Structural Database (CSD) hosted by the Cambridge 
# Crystallographic Data Centre (CCDC).
# 
# Full information about CCDC data access policies and citation 
# guidelines are available at http://www.ccdc.cam.ac.uk/access/V1 
# 
# Audit and citation data items may have been added by the CCDC. 
# Please retain this information to preserve the provenance of 
# this file and to allow appropriate attribution of the data. 
# 
#######################################################################
data_cut81_a
_audit_creation_date               2022-12-05
_audit_creation_method
;
Olex2 1.5
(compiled 2022.04.07 svn.rca3783a0 for OlexSys, GUI svn.r6498)
;
_shelx_SHELXL_version_number       2018/3
loop_
  _audit_author_name
  _audit_author_address
 'Matthew Wallis'
;
Western Sydney University
Australia
;

_audit_contact_author_address      ?
_audit_contact_author_email        ?
_audit_contact_author_name         ''
_audit_contact_author_phone        ?
_audit_update_record
;
2022-12-05 deposited with the CCDC.	2022-12-05 downloaded from the CCDC.
;
_publ_contact_author_id_orcid      ?
_publ_section_references
;
Dolomanov, O.V., Bourhis, L.J., Gildea, R.J, Howard, J.A.K. & Puschmann, H.
 (2009), J. Appl. Cryst. 42, 339-341.

Sheldrick, G.M. (2015). Acta Cryst. C71, 3-8.
;
_chemical_name_common              ?
_chemical_name_systematic          ?
_chemical_formula_moiety          
 'C90 H64 N24 Ni2 O3, 4(B F4), 1.5(C2 N), 2(C2 H3 N), C4 O, 0.25(O)'
_chemical_formula_sum              'C101 H70 B4 F16 N27.50 Ni2 O4.25'
_chemical_formula_weight           2201.50
_chemical_melting_point            ?
# end Validation Reply Form
_chemical_properties_physical      Efflorescent
loop_
  _atom_type_symbol
  _atom_type_description
  _atom_type_scat_dispersion_real
  _atom_type_scat_dispersion_imag
  _atom_type_scat_source
 C C 0.0033 0.0016 'International Tables Vol C Tables 4.2.6.8 and 6.1.1.4'
 H H 0.0000 0.0000 'International Tables Vol C Tables 4.2.6.8 and 6.1.1.4'
 B B 0.0013 0.0007 'International Tables Vol C Tables 4.2.6.8 and 6.1.1.4'
 F F 0.0171 0.0103 'International Tables Vol C Tables 4.2.6.8 and 6.1.1.4'
 N N 0.0061 0.0033 'International Tables Vol C Tables 4.2.6.8 and 6.1.1.4'
 Ni Ni 0.3393 1.1124 'International Tables Vol C Tables 4.2.6.8 and 6.1.1.4'
 O O 0.0106 0.0060 'International Tables Vol C Tables 4.2.6.8 and 6.1.1.4'

_shelx_space_group_comment
;
The symmetry employed for this shelxl refinement is uniquely defined
by the following loop, which should always be used as a source of
symmetry information in preference to the above space-group names.
They are only intended as comments.
;
_space_group_crystal_system        'triclinic'
_space_group_IT_number             2
_space_group_name_H-M_alt          'P -1'
_space_group_name_Hall             '-P 1'
loop_
  _space_group_symop_operation_xyz
 'x, y, z'
 '-x, -y, -z'

_cell_length_a                     16.230(3)
_cell_length_b                     17.690(4)
_cell_length_c                     20.430(4)
_cell_angle_alpha                  80.45(3)
_cell_angle_beta                   89.74(3)
_cell_angle_gamma                  72.24(3)
_cell_volume                       5502(2)
_cell_formula_units_Z              2
_cell_measurement_reflns_used      3296
_cell_measurement_temperature      100
_cell_measurement_theta_max        20.00
_cell_measurement_theta_min        2.40
_shelx_estimated_absorpt_T_max     0.991
_shelx_estimated_absorpt_T_min     0.919
_exptl_absorpt_coefficient_mu      0.432
_exptl_absorpt_correction_T_max    ?
_exptl_absorpt_correction_T_min    ?
_exptl_absorpt_correction_type     none
_exptl_absorpt_process_details     ?
_exptl_absorpt_special_details     ?
_exptl_crystal_colour              'clear light yellow'
_exptl_crystal_colour_lustre       clear
_exptl_crystal_colour_modifier     light
_exptl_crystal_colour_primary      yellow
_exptl_crystal_density_diffrn      1.329
_exptl_crystal_density_meas        ?
_exptl_crystal_density_method      ?
_exptl_crystal_description         plate
_exptl_crystal_F_000               2245
_exptl_crystal_recrystallization_method 
 'Vapour diffusion of diethyl ether into acetonitrile'
_exptl_crystal_size_max            0.2
_exptl_crystal_size_mid            0.1
_exptl_crystal_size_min            0.02
_exptl_transmission_factor_max     ?
_exptl_transmission_factor_min     ?
_diffrn_reflns_av_R_equivalents    0.0280
_diffrn_reflns_av_unetI/netI       0.0181
_diffrn_reflns_Laue_measured_fraction_full  0.979
_diffrn_reflns_Laue_measured_fraction_max  0.953
_diffrn_reflns_limit_h_max         20
_diffrn_reflns_limit_h_min         -20
_diffrn_reflns_limit_k_max         21
_diffrn_reflns_limit_k_min         -21
_diffrn_reflns_limit_l_max         25
_diffrn_reflns_limit_l_min         -25
_diffrn_reflns_number              127821
_diffrn_reflns_point_group_measured_fraction_full  0.979
_diffrn_reflns_point_group_measured_fraction_max  0.953
_diffrn_reflns_theta_full          25.242
_diffrn_reflns_theta_max           26.022
_diffrn_reflns_theta_min           1.012
_diffrn_ambient_temperature        100
_diffrn_detector_area_resol_mean   ?
_diffrn_measured_fraction_theta_full  0.979
_diffrn_measured_fraction_theta_max  0.953
_diffrn_measurement_device_type    'Australian Synchrotron MX1'
_diffrn_measurement_method         '\w scans'
_diffrn_radiation_type             MoK\a
_diffrn_radiation_wavelength       0.71073
_diffrn_source                     ?
_diffrn_special_details            ?
_diffrn_standards_number           0
_reflns_Friedel_coverage           0.000
_reflns_Friedel_fraction_full      .
_reflns_Friedel_fraction_max       .
_reflns_number_gt                  16141
_reflns_number_total               20663
_reflns_special_details
;
 Reflections were merged by SHELXL according to the crystal
 class for the calculation of statistics and refinement.
 
 Structure factors included contributions from the .fab file.
 
 _reflns_Friedel_fraction is defined as the number of unique
 Friedel pairs measured divided by the number that would be
 possible theoretically, ignoring centric projections and
 systematic absences.
;
_reflns_threshold_expression       'I > 2\s(I)'
_computing_cell_refinement         ?
_computing_data_collection         ?
_computing_data_reduction          ?
_computing_molecular_graphics      'Olex2 1.5 (Dolomanov et al., 2009)'
_computing_publication_material    'Olex2 1.5 (Dolomanov et al., 2009)'
_computing_structure_refinement    'SHELXL 2018/3 (Sheldrick, 2015)'
_computing_structure_solution      'SHELXT 2018/2 (Sheldrick, 2018)'
_refine_diff_density_max           1.328
_refine_diff_density_min           -0.811
_refine_diff_density_rms           0.107
_refine_ls_extinction_coef         .
_refine_ls_extinction_method       none
_refine_ls_goodness_of_fit_ref     1.725
_refine_ls_hydrogen_treatment      constr
_refine_ls_matrix_type             full
_refine_ls_number_parameters       1435
_refine_ls_number_reflns           20663
_refine_ls_number_restraints       912
_refine_ls_R_factor_all            0.1239
_refine_ls_R_factor_gt             0.1109
_refine_ls_restrained_S_all        1.732
_refine_ls_shift/su_max            0.001
_refine_ls_shift/su_mean           0.000
_refine_ls_structure_factor_coef   Fsqd
_refine_ls_weighting_details      
 'w=1/[\s^2^(Fo^2^)+(0.2000P)^2^] where P=(Fo^2^+2Fc^2^)/3'
_refine_ls_weighting_scheme        calc
_refine_ls_wR_factor_gt            0.3683
_refine_ls_wR_factor_ref           0.3899
_refine_special_details            SQUEEZE
_olex2_refinement_description
;
1. Shared sites
{C15F, C15C}
{C14F, C14C}
2. Others
 Fixed Sof: O1W(0.25) N1S3(0.5) C1S3(0.5) C2S3(0.5)
 Fixed Uiso: H25A(0.077) H2A(0.073) H6B(0.081) H22B(0.081) H6A(0.08)
 H1A(0.083) H24B(0.08) H7A(0.082) H22C(0.086) H24A(0.088) H25B(0.081)
 H9B(0.087) H4A(0.083) H29A(0.095) H7B(0.086) H15C(0.075) H5A(0.093)
 H27A(0.093) H25C(0.089) H30A(0.096) H15B(0.101) H22A(0.095) H11B(0.101)
 H14C(0.076) H24C(0.1) H17C(0.083) H2B(0.102) H6C(0.092) H14B(0.107)
 H20A(0.082) H27B(0.095) H29B(0.106) H1B(0.105) H15A(0.073) H9C(0.099)
 H20B(0.104) H26A(0.101) H21B(0.102) H18C(0.088) H4B(0.102) H21A(0.081)
 H29C(0.118) H17B(0.12) H30B(0.123) H5B(0.116) H20C(0.083) H14A(0.076)
 H18A(0.075) H26B(0.106) H18B(0.115) H7C(0.127) H30C(0.132) H2C(0.121)
 H21C(0.093) H17A(0.076) H27C(0.139) H26C(0.15) H11C(0.081) H1C(0.152)
 H11A(0.087) H12A(0.088) H12C(0.089) H4C(0.163) H5C(0.195) H2SA(0.241)
 H2SB(0.241) H2SC(0.241) H17F(0.103) H18F(0.099) H20F(0.102) H21F(0.114)
 H15F(0.114) H14F(0.115) H11F(0.138) H12F(0.129) H15D(0.065) H14D(0.061)
 H12D(0.127) H20D(0.066) H21D(0.075) H18D(0.098) H17D(0.088) H11D(0.11)
 H2SD(0.283) H2SE(0.283) H2SF(0.283) H2TA(0.255) H2TB(0.255) H2TC(0.255)
 N1S3(0.15) C1S3(0.15) C2S3(0.15)
 Fixed X: H25A(0.154408) H2A(1.049403) H6B(0.908051) H22B(0.227627)
 H6A(0.942983) H1A(1.158229) H24B(0.039599) H7A(0.768333) H22C(0.428746)
 H24A(0.109972) H25B(-0.008766) H9B(0.884188) H4A(0.876907) H29A(0.140998)
 H7B(1.017959) H15C(0.765878) H5A(0.993488) H27A(0.056271) H25C(0.123186)
 H30A(0.107078) H15B(0.737293) H22A(0.161778) H11B(0.74713) H14C(0.720361)
 H24C(0.358613) H17C(0.591439) H2B(1.025053) H6C(0.772256) H14B(0.660712)
 H20A(0.154231) H27B(-0.102857) H29B(-0.145463) H1B(1.136263) H15A(0.527722)
 H9C(0.603538) H20B(0.381496) H26A(0.030956) H21B(0.525477) H18C(0.504724)
 H4B(1.109984) H21A(0.190551) H29C(0.07312) H17B(0.510205) H30B(-0.293136)
 H5B(1.222339) H20C(0.331891) H14A(0.384758) H18A(0.305762) H26B(-0.249927)
 H18B(0.367477) H7C(0.596334) H30C(0.033731) H2C(0.800994) H21C(0.416277)
 H17A(0.351012) H27C(0.322076) H26C(0.270214) H11C(0.516421) H1C(0.783082)
 H11A(0.563152) H12A(0.418245) H12C(0.47271) H4C(0.539585) H5C(0.529566)
 H2SA(0.231114) H2SB(0.249541) H2SC(0.276599) H17F(0.612968) H18F(0.509759)
 H20F(0.330253) H21F(0.435183) H15F(0.75468) H14F(0.719036) H11F(0.537823)
 H12F(0.503655) H15D(0.519119) H14D(0.37608) H12D(0.416917) H20D(0.138344)
 H21D(0.181115) H18D(0.32342) H17D(0.356437) H11D(0.555713) O1W(0.5)
 H2SD(0.766966) H2SE(0.703935) H2SF(0.666032) H2TA(0.636152) H2TB(0.562618)
 H2TC(0.656248)
 Fixed Y: H25A(0.062033) H2A(0.399859) H6B(0.191156) H22B(0.431991)
 H6A(0.349038) H1A(0.459888) H24B(0.502382) H7A(0.566982) H22C(0.0891)
 H24A(0.020231) H25B(0.291364) H9B(0.14736) H4A(0.6224) H29A(-0.057442)
 H7B(0.059853) H15C(0.081892) H5A(0.672402) H27A(-0.075758) H25C(0.26042) H30A(-
 0.171815) H15B(0.376739) H22A(0.153228) H11B(0.143866) H14C(-0.003824)
 H24C(0.124503) H17C(0.08682) H2B(0.132596) H6C(0.394076) H14B(0.409429)
 H20A(0.359601) H27B(0.566748) H29B(0.350299) H1B(0.052172) H15A(0.403306)
 H9C(0.194621) H20B(0.312232) H26A(-0.193753) H21B(0.311074) H18C(0.136824)
 H4B(-0.024207) H21A(0.438932) H29C(0.235907) H17B(0.30799) H30B(0.418823) H5B(-
 0.097312) H20C(0.029711) H14A(0.399321) H18A(0.159301) H26B(0.626661)
 H18B(0.305425) H7C(0.290367) H30C(0.254861) H2C(0.392075) H21C(-0.020132)
 H17A(0.238643) H27C(0.184061) H26C(0.211636) H11C(0.218668) H1C(0.461802)
 H11A(0.3573) H12A(0.361167) H12C(0.130683) H4C(0.428083) H5C(0.499677)
 H2SA(0.153866) H2SB(0.107748) H2SC(0.187628) H17F(0.078902) H18F(0.13192)
 H20F(0.068112) H21F(0.012429) H15F(0.075074) H14F(-0.011241) H11F(0.257281)
 H12F(0.171389) H15D(0.428944) H14D(0.431532) H12D(0.413934) H20D(0.380046)
 H21D(0.46377) H18D(0.188547) H17D(0.271415) H11D(0.414477) O1W(0)
 H2SD(0.212155) H2SE(0.185632) H2SF(0.261858) H2TA(0.094594) H2TB(0.165734)
 H2TC(0.175109)
 Fixed Z: H25A(0.5391) H2A(0.086091) H6B(-0.010837) H22B(0.432785)
 H6A(0.084265) H1A(0.075672) H24B(0.431824) H7A(0.087577) H22C(0.546061)
 H24A(0.356328) H25B(0.443471) H9B(0.243591) H4A(0.078846) H29A(0.583474)
 H7B(0.16561) H15C(0.163949) H5A(0.074) H27A(0.403505) H25C(0.596058)
 H30A(0.62584) H15B(0.232708) H22A(0.287452) H11B(0.29172) H14C(0.244942)
 H24C(0.674474) H17C(0.354233) H2B(-0.061251) H6C(-0.069776) H14B(0.328309)
 H20A(0.30145) H27B(0.405915) H29B(0.463079) H1B(-0.113796) H15A(0.009709)
 H9C(0.019211) H20B(0.528508) H26A(0.452238) H21B(0.52065) H18C(0.437417)
 H4B(0.109885) H21A(0.208794) H29C(0.7025) H17B(0.324106) H30B(0.45268)
 H5B(0.051433) H20C(0.393409) H14A(0.019491) H18A(0.243874) H26B(0.401188)
 H18B(0.33305) H7C(-0.113329) H30C(0.808785) H2C(-0.189663) H21C(0.308883)
 H17A(0.157564) H27C(0.768427) H26C(0.870258) H11C(0.123229) H1C(-0.30014)
 H11A(0.21059) H12A(0.221605) H12C(0.2035) H4C(-0.187923) H5C(-0.298061)
 H2SA(0.002567) H2SB(0.077875) H2SC(0.055489) H17F(0.394701) H18F(0.468589)
 H20F(0.372113) H21F(0.299029) H15F(0.138237) H14F(0.225741) H11F(0.159872)
 H12F(0.249486) H15D(0.020754) H14D(0.034873) H12D(0.228187) H20D(0.309212)
 H21D(0.224299) H18D(0.262482) H17D(0.170832) H11D(0.211664) O1W(0)
 H2SD(0.585717) H2SE(0.638909) H2SF(0.581172) H2TA(0.647309) H2TB(0.602389)
 H2TC(0.613823)
;
_atom_sites_solution_hydrogens     geom
_atom_sites_solution_primary       ?
_atom_sites_solution_secondary     ?
loop_
  _atom_site_label
  _atom_site_type_symbol
  _atom_site_fract_x
  _atom_site_fract_y
  _atom_site_fract_z
  _atom_site_U_iso_or_equiv
  _atom_site_adp_type
  _atom_site_occupancy
  _atom_site_site_symmetry_order
  _atom_site_calc_flag
  _atom_site_refinement_flags_posn
  _atom_site_refinement_flags_adp
  _atom_site_refinement_flags_occupancy
  _atom_site_disorder_assembly
  _atom_site_disorder_group
 Ni2 Ni 0.21919(3) 0.21678(3) 0.44757(3) 0.0666(2) Uani 1 1 d . . . . .
 Ni1 Ni 0.75433(4) 0.28991(4) 0.09142(3) 0.0717(2) Uani 1 1 d . . . . .
 N7A N 0.1223(2) 0.0173(2) 0.45918(18) 0.0655(8) Uani 1 1 d . . . . .
 N2A N 0.8813(2) 0.4712(2) 0.08454(16) 0.0629(8) Uani 1 1 d . . . . .
 O1B O 0.6137(2) 0.3169(3) 0.42046(19) 0.1003(13) Uani 1 1 d . . . . .
 N6B N 0.1054(2) 0.3132(2) 0.44127(19) 0.0684(9) Uani 1 1 d . . . . .
 N6A N 0.1660(2) 0.1241(2) 0.44984(18) 0.0665(9) Uani 1 1 d . . . . .
 N2B N 0.9872(3) 0.1094(2) 0.06415(18) 0.0686(9) Uani 1 1 d . . . . .
 N5B N 0.2692(2) 0.3164(2) 0.43550(19) 0.0680(9) Uani 1 1 d . . . . .
 N7B N -0.0184(2) 0.4110(2) 0.43831(18) 0.0667(9) Uani 1 1 d . . . . .
 N5C N 0.3469(2) 0.1332(2) 0.4698(2) 0.0719(10) Uani 1 1 d D . . . .
 N3B N 0.8669(3) 0.2023(2) 0.08125(18) 0.0703(9) Uani 1 1 d . . . . .
 N3A N 0.8132(2) 0.3791(2) 0.08964(18) 0.0682(9) Uani 1 1 d . . . . .
 N1A N 1.0867(3) 0.5708(3) 0.07483(18) 0.0763(10) Uani 1 1 d . . . . .
 N6C N 0.2281(2) 0.2052(2) 0.55069(19) 0.0683(9) Uani 1 1 d . . . . .
 N4B N 0.7926(3) 0.2385(3) 0.19391(18) 0.0741(10) Uani 1 1 d . . . . .
 N7C N 0.2310(3) 0.1978(3) 0.6590(2) 0.0775(10) Uani 1 1 d . . . . .
 N5A N 0.2041(3) 0.2140(3) 0.3435(2) 0.0786(11) Uani 1 1 d D . . . .
 N3C N 0.7225(3) 0.3169(3) -0.01037(18) 0.0730(10) Uani 1 1 d D . . . .
 N4C N 0.6732(3) 0.2165(3) 0.08514(18) 0.0763(10) Uani 1 1 d D . . . .
 N4A N 0.6450(3) 0.3904(3) 0.1041(2) 0.0822(11) Uani 1 1 d D . . . .
 N8A N 0.0665(3) -0.1935(3) 0.5436(2) 0.0811(11) Uani 1 1 d . . . . .
 O1A O 0.2998(3) 0.3921(4) 0.1227(3) 0.0690(15) Uiso 0.589(8) 1 d D . P A 1
 N2C N 0.6823(3) 0.3558(3) -0.1157(2) 0.0927(14) Uani 1 1 d D . . . .
 C28A C 0.1034(2) -0.0549(3) 0.4879(2) 0.0655(10) Uani 1 1 d . . . . .
 C25A C 0.1490(3) 0.0675(3) 0.4921(2) 0.0638(10) Uani 1 1 d . . . . .
 H25A H 0.154408 0.062033 0.539100 0.077 Uiso 1 1 calc R U . . .
 C2A C 1.0357(3) 0.4566(3) 0.08239(18) 0.0605(9) Uani 1 1 d . . . . .
 H2A H 1.049403 0.399859 0.086091 0.073 Uiso 1 1 calc R U . . .
 C8B C 0.9052(3) 0.1559(3) 0.1415(2) 0.0716(11) Uani 1 1 d . . . . .
 N1B N 1.1879(4) -0.0315(3) -0.0366(2) 0.0937(13) Uani 1 1 d D . . . .
 C3A C 0.9507(3) 0.5050(3) 0.08187(18) 0.0621(9) Uani 1 1 d . . . . .
 C6B C 0.9180(3) 0.1720(3) 0.0356(2) 0.0678(10) Uani 1 1 d . . . . .
 H6B H 0.908051 0.191156 -0.010837 0.081 Uiso 1 1 calc R U . . .
 C22B C 0.2120(3) 0.3841(3) 0.4350(2) 0.0677(10) Uani 1 1 d . . . . .
 H22B H 0.227627 0.431991 0.432785 0.081 Uiso 1 1 calc R U . . .
 C6A C 0.8897(3) 0.3902(3) 0.0859(2) 0.0663(10) Uani 1 1 d . . . . .
 H6A H 0.942983 0.349038 0.084265 0.080 Uiso 1 1 calc R U . . .
 N8B N -0.2852(3) 0.5313(3) 0.4249(3) 0.0977(14) Uani 1 1 d . . . . .
 O1C O 0.5646(6) -0.0023(5) 0.2741(4) 0.066(2) Uani 0.519(19) 1 d D . P B 1
 C1A C 1.1002(3) 0.4932(3) 0.0774(2) 0.0696(11) Uani 1 1 d . . . . .
 H1A H 1.158229 0.459888 0.075672 0.083 Uiso 1 1 calc R U . . .
 C28B C -0.1083(3) 0.4515(3) 0.4344(2) 0.0698(11) Uani 1 1 d . . . . .
 C24B C 0.0466(3) 0.4465(3) 0.4352(2) 0.0665(10) Uani 1 1 d . . . . .
 H24B H 0.039599 0.502382 0.431824 0.080 Uiso 1 1 calc R U . . .
 C3B C 1.0562(3) 0.0619(3) 0.0304(2) 0.0703(10) Uani 1 1 d D . . . .
 C7A C 0.7945(3) 0.5110(3) 0.0880(2) 0.0686(11) Uani 1 1 d . . . . .
 H7A H 0.768333 0.566982 0.087577 0.082 Uiso 1 1 calc R U . . .
 C22C C 0.3714(3) 0.1210(3) 0.5312(2) 0.0717(11) Uani 1 1 d . . . . .
 H22C H 0.428746 0.089100 0.546061 0.086 Uiso 1 1 calc R U . . .
 C24A C 0.1243(3) 0.0435(3) 0.3917(2) 0.0731(11) Uani 1 1 d . . . . .
 H24A H 0.109972 0.020231 0.356328 0.088 Uiso 1 1 calc R U . . .
 C8A C 0.7539(3) 0.4540(3) 0.0921(2) 0.0725(12) Uani 1 1 d . . . . .
 C25B C 0.0211(3) 0.3302(3) 0.4414(2) 0.0676(10) Uani 1 1 d . . . . .
 H25B H -0.008766 0.291364 0.443471 0.081 Uiso 1 1 calc R U . . .
 C23B C 0.1229(3) 0.3859(3) 0.4379(2) 0.0662(10) Uani 1 1 d . . . . .
 C9A C 0.6627(3) 0.4580(4) 0.0985(2) 0.0797(14) Uani 1 1 d . . . . .
 C23A C 0.1515(3) 0.1101(3) 0.3870(2) 0.0733(12) Uani 1 1 d . . . . .
 C9B C 0.8622(3) 0.1773(3) 0.2009(2) 0.0723(11) Uani 1 1 d . . . . .
 H9B H 0.884188 0.147360 0.243591 0.087 Uiso 1 1 calc R U . . .
 C19C C 0.4072(9) 0.0911(13) 0.4247(7) 0.067(4) Uani 0.519(19) 1 d D . P B 1
 C10B C 0.7485(3) 0.2574(3) 0.2533(2) 0.0759(12) Uani 1 1 d D . . . .
 C4A C 0.9343(3) 0.5872(3) 0.0788(2) 0.0694(11) Uani 1 1 d . . . . .
 H4A H 0.876907 0.622400 0.078846 0.083 Uiso 1 1 calc R U . . .
 C23C C 0.3095(3) 0.1572(3) 0.5777(2) 0.0734(11) Uani 1 1 d . . . . .
 C29A C 0.1178(3) -0.0841(4) 0.5551(3) 0.0790(13) Uani 1 1 d . . . . .
 H29A H 0.140998 -0.057442 0.583474 0.095 Uiso 1 1 calc R U . . .
 C10C C 0.6455(8) 0.1582(9) 0.1331(8) 0.060(3) Uani 0.519(19) 1 d D . P B 1
 C7B C 0.9796(3) 0.0986(3) 0.1326(2) 0.0719(11) Uani 1 1 d . . . . .
 H7B H 1.017959 0.059853 0.165610 0.086 Uiso 1 1 calc R U . . .
 C15C C 0.7058(8) 0.0919(8) 0.1708(8) 0.062(4) Uani 0.519(19) 1 d D . P B 1
 H15C H 0.765878 0.081892 0.163949 0.075 Uiso 0.519(19) 1 calc R U P B 1
 C5A C 1.0046(4) 0.6162(3) 0.0757(2) 0.0777(12) Uani 1 1 d . . . . .
 H5A H 0.993488 0.672402 0.074000 0.093 Uiso 1 1 calc R U . . .
 C27A C 0.0690(3) -0.0953(3) 0.4497(3) 0.0774(12) Uani 1 1 d . . . . .
 H27A H 0.056271 -0.075758 0.403505 0.093 Uiso 1 1 calc R U . . .
 N8C N 0.1477(4) 0.2346(4) 0.8492(3) 0.1120(17) Uani 1 1 d D . . . .
 C25C C 0.1821(3) 0.2278(3) 0.6000(2) 0.0741(11) Uani 1 1 d . . . . .
 H25C H 0.123186 0.260420 0.596058 0.089 Uiso 1 1 calc R U . . .
 C19A C 0.2292(4) 0.2535(5) 0.2823(3) 0.0556(18) Uiso 0.589(8) 1 d D . P A 1
 C16B C 0.5296(3) 0.3126(4) 0.4217(2) 0.0790(13) Uani 1 1 d D . . . .
 C30A C 0.0977(3) -0.1524(3) 0.5794(3) 0.0803(13) Uani 1 1 d . . . . .
 H30A H 0.107078 -0.171815 0.625840 0.096 Uiso 1 1 calc R U . . .
 C15B C 0.7238(3) 0.3362(4) 0.2635(2) 0.0840(13) Uani 1 1 d D . . . .
 H15B H 0.737293 0.376739 0.232708 0.101 Uiso 1 1 calc R U . . .
 C19B C 0.3594(3) 0.3142(3) 0.4308(2) 0.0688(10) Uani 1 1 d D . . . .
 C22A C 0.1718(3) 0.1598(4) 0.3316(2) 0.0788(13) Uani 1 1 d . . . . .
 H22A H 0.161778 0.153228 0.287452 0.095 Uiso 1 1 calc R U . . .
 C11B C 0.7291(3) 0.1982(4) 0.2986(2) 0.0841(13) Uani 1 1 d D . . . .
 H11B H 0.747130 0.143866 0.291720 0.101 Uiso 1 1 calc R U . . .
 C14C C 0.6784(8) 0.0402(7) 0.2185(7) 0.063(4) Uani 0.519(19) 1 d D . P B 1
 H14C H 0.720361 -0.003824 0.244942 0.076 Uiso 0.519(19) 1 calc R U P B 1
 C8C C 0.6652(3) 0.2784(3) -0.0254(2) 0.0805(13) Uani 1 1 d D . . . .
 C24C C 0.3110(4) 0.1531(3) 0.6440(3) 0.0832(13) Uani 1 1 d . . . . .
 H24C H 0.358613 0.124503 0.674474 0.100 Uiso 1 1 calc R U . . .
 C28C C 0.2026(4) 0.2096(3) 0.7236(3) 0.0829(13) Uani 1 1 d D . . . .
 C17C C 0.5381(8) 0.0758(9) 0.3617(7) 0.069(3) Uani 0.519(19) 1 d D . P B 1
 H17C H 0.591439 0.086820 0.354233 0.083 Uiso 0.519(19) 1 calc R U P B 1
 C2B C 1.0642(4) 0.0848(3) -0.0369(2) 0.0851(13) Uani 1 1 d D . . . .
 H2B H 1.025053 0.132596 -0.061251 0.102 Uiso 1 1 calc R U . . .
 C12B C 0.6835(4) 0.2186(4) 0.3537(2) 0.0899(15) Uani 1 1 d D . . . .
 C13B C 0.6595(3) 0.2949(4) 0.3644(2) 0.0847(14) Uani 1 1 d D . . . .
 C6C C 0.7342(3) 0.3622(3) -0.0655(2) 0.0763(12) Uani 1 1 d D . . . .
 H6C H 0.772256 0.394076 -0.069776 0.092 Uiso 1 1 calc R U . . .
 C14B C 0.6784(3) 0.3556(4) 0.3202(3) 0.0892(14) Uani 1 1 d D . . . .
 H14B H 0.660712 0.409429 0.328309 0.107 Uiso 1 1 calc R U . . .
 C20A C 0.1944(5) 0.3347(5) 0.2716(4) 0.068(2) Uiso 0.589(8) 1 d D . P A 1
 H20A H 0.154231 0.359601 0.301450 0.082 Uiso 0.589(8) 1 calc R U P A 1
 C27B C -0.1406(3) 0.5350(3) 0.4160(3) 0.0790(12) Uani 1 1 d . . . . .
 H27B H -0.102857 0.566748 0.405915 0.095 Uiso 1 1 calc R U . . .
 C29B C -0.1658(3) 0.4071(4) 0.4493(3) 0.0880(14) Uani 1 1 d . . . . .
 H29B H -0.145463 0.350299 0.463079 0.106 Uiso 1 1 calc R U . . .
 C1B C 1.1308(4) 0.0362(4) -0.0676(3) 0.0878(14) Uani 1 1 d D . . . .
 H1B H 1.136263 0.052172 -0.113796 0.105 Uiso 1 1 calc R U . . .
 C10A C 0.5560(4) 0.3852(5) 0.1093(3) 0.0578(17) Uiso 0.589(8) 1 d D . P A 1
 C15A C 0.5047(4) 0.3958(5) 0.0523(4) 0.0609(18) Uiso 0.589(8) 1 d D . P A 1
 H15A H 0.527722 0.403306 0.009709 0.073 Uiso 0.589(8) 1 calc R U P A 1
 C9C C 0.6416(4) 0.2237(4) 0.0279(2) 0.0826(14) Uani 1 1 d D . . . .
 H9C H 0.603538 0.194621 0.019211 0.099 Uiso 1 1 calc R U . . .
 C20B C 0.4071(3) 0.3127(4) 0.4866(3) 0.0868(14) Uani 1 1 d D . . . .
 H20B H 0.381496 0.312232 0.528508 0.104 Uiso 1 1 calc R U . . .
 C26A C 0.0529(4) -0.1649(3) 0.4794(3) 0.0844(14) Uani 1 1 d . . . . .
 H26A H 0.030956 -0.193753 0.452238 0.101 Uiso 1 1 calc R U . . .
 C21B C 0.4926(3) 0.3120(4) 0.4820(3) 0.0854(14) Uani 1 1 d D . . . .
 H21B H 0.525477 0.311074 0.520650 0.102 Uiso 1 1 calc R U . . .
 C18C C 0.4859(9) 0.1052(12) 0.4111(7) 0.073(4) Uani 0.519(19) 1 d D . P B 1
 H18C H 0.504724 0.136824 0.437417 0.088 Uiso 0.519(19) 1 calc R U P B 1
 C4B C 1.1142(4) -0.0068(3) 0.0638(3) 0.0853(13) Uani 1 1 d D . . . .
 H4B H 1.109984 -0.024207 0.109885 0.102 Uiso 1 1 calc R U . . .
 C21A C 0.2167(5) 0.3821(5) 0.2172(4) 0.067(2) Uiso 0.589(8) 1 d D . P A 1
 H21A H 0.190551 0.438932 0.208794 0.081 Uiso 0.589(8) 1 calc R U P A 1
 C29C C 0.1158(4) 0.2299(4) 0.7363(3) 0.0980(17) Uani 1 1 d D . . . .
 H29C H 0.073120 0.235907 0.702500 0.118 Uiso 1 1 calc R U . . .
 C16A C 0.2762(4) 0.3459(4) 0.1766(3) 0.0581(17) Uiso 0.589(8) 1 d D . P A 1
 C17B C 0.4837(3) 0.3097(5) 0.3656(2) 0.100(2) Uani 1 1 d D . . . .
 H17B H 0.510205 0.307990 0.324106 0.120 Uiso 1 1 calc R U . . .
 C16C C 0.5105(9) 0.0302(9) 0.3236(6) 0.061(3) Uani 0.519(19) 1 d D . P B 1
 C30B C -0.2532(4) 0.4484(5) 0.4435(4) 0.1022(19) Uani 1 1 d . . . . .
 H30B H -0.293136 0.418823 0.452680 0.123 Uiso 1 1 calc R U . . .
 C5B C 1.1804(4) -0.0508(4) 0.0279(3) 0.0969(17) Uani 1 1 d D . . . .
 H5B H 1.222339 -0.097312 0.051433 0.116 Uiso 1 1 calc R U . . .
 C13A C 0.3874(4) 0.3885(5) 0.1207(3) 0.0618(18) Uiso 0.589(8) 1 d D . P A 1
 C20C C 0.3842(9) 0.0425(8) 0.3853(6) 0.069(3) Uani 0.519(19) 1 d D . P B 1
 H20C H 0.331891 0.029711 0.393409 0.083 Uiso 0.519(19) 1 calc R U P B 1
 C14A C 0.4199(4) 0.3952(5) 0.0578(4) 0.0630(18) Uiso 0.589(8) 1 d D . P A 1
 H14A H 0.384758 0.399321 0.019491 0.076 Uiso 0.589(8) 1 calc R U P A 1
 C18A C 0.2848(5) 0.2164(5) 0.2386(3) 0.0626(18) Uiso 0.589(8) 1 d D . P A 1
 H18A H 0.305762 0.159301 0.243874 0.075 Uiso 0.589(8) 1 calc R U P A 1
 C26B C -0.2285(4) 0.5696(4) 0.4130(3) 0.0882(15) Uani 1 1 d . . . . .
 H26B H -0.249927 0.626661 0.401188 0.106 Uiso 1 1 calc R U . . .
 C18B C 0.3989(3) 0.3092(4) 0.3709(2) 0.0962(19) Uani 1 1 d D . . . .
 H18B H 0.367477 0.305425 0.333050 0.115 Uiso 1 1 calc R U . . .
 C7C C 0.6383(4) 0.3049(5) -0.0902(3) 0.106(2) Uani 1 1 d D . . . .
 H7C H 0.596334 0.290367 -0.113329 0.127 Uiso 1 1 calc R U . . .
 C13C C 0.5912(7) 0.0514(6) 0.2285(5) 0.061(3) Uani 0.519(19) 1 d D . P B 1
 C30C C 0.0935(5) 0.2412(5) 0.8000(3) 0.110(2) Uani 1 1 d D . . . .
 H30C H 0.033731 0.254861 0.808785 0.132 Uiso 1 1 calc R U . . .
 C2C C 0.7454(5) 0.4127(4) -0.2120(3) 0.1012(17) Uiso 1 1 d D . . . .
 H2C H 0.800994 0.392075 -0.189663 0.121 Uiso 1 1 calc R U . . .
 C21C C 0.4341(9) 0.0123(10) 0.3350(7) 0.078(4) Uani 0.519(19) 1 d D . P B 1
 H21C H 0.416277 -0.020132 0.308883 0.093 Uiso 0.519(19) 1 calc R U P B 1
 C17A C 0.3098(5) 0.2636(4) 0.1868(4) 0.0633(18) Uiso 0.589(8) 1 d D . P A 1
 H17A H 0.351012 0.238643 0.157564 0.076 Uiso 0.589(8) 1 calc R U P A 1
 C27C C 0.2616(5) 0.2003(6) 0.7747(3) 0.116(2) Uani 1 1 d D . . . .
 H27C H 0.322076 0.184061 0.768427 0.139 Uiso 1 1 calc R U . . .
 C26C C 0.2296(6) 0.2154(6) 0.8356(3) 0.125(2) Uani 1 1 d D . . . .
 H26C H 0.270214 0.211636 0.870258 0.150 Uiso 1 1 calc R U . . .
 C3C C 0.6727(4) 0.4030(4) -0.1806(3) 0.1009(17) Uiso 1 1 d D . . . .
 C11C C 0.5586(6) 0.1723(6) 0.1468(5) 0.068(3) Uani 0.519(19) 1 d D . P B 1
 H11C H 0.516421 0.218668 0.123229 0.081 Uiso 0.519(19) 1 calc R U P B 1
 C1C C 0.7346(6) 0.4537(5) -0.2772(4) 0.126(2) Uiso 1 1 d D . . . .
 H1C H 0.783082 0.461802 -0.300140 0.152 Uiso 1 1 calc R U . . .
 C11A C 0.5254(5) 0.3694(5) 0.1723(4) 0.072(2) Uiso 0.589(8) 1 d D . P A 1
 H11A H 0.563152 0.357300 0.210590 0.087 Uiso 0.589(8) 1 calc R U P A 1
 C12A C 0.4404(5) 0.3712(5) 0.1790(4) 0.073(2) Uiso 0.589(8) 1 d D . P A 1
 H12A H 0.418245 0.361167 0.221605 0.088 Uiso 0.589(8) 1 calc R U P A 1
 N1C N 0.6566(6) 0.4813(6) -0.3069(5) 0.164(3) Uiso 1 1 d D . . . .
 C12C C 0.5323(7) 0.1194(6) 0.1945(5) 0.074(3) Uani 0.519(19) 1 d D . P B 1
 H12C H 0.472710 0.130683 0.203500 0.089 Uiso 0.519(19) 1 calc R U P B 1
 C4C C 0.5892(6) 0.4343(6) -0.2102(5) 0.136(3) Uiso 1 1 d D . . . .
 H4C H 0.539585 0.428083 -0.187923 0.163 Uiso 1 1 calc R U . . .
 C5C C 0.5846(9) 0.4753(7) -0.2753(6) 0.162(4) Uiso 1 1 d D . . . .
 H5C H 0.529566 0.499677 -0.298061 0.195 Uiso 1 1 calc R U . . .
 F7 F 0.8879(2) -0.0386(2) 0.23936(16) 0.1052(10) Uani 1 1 d D . . . .
 F5 F 0.9505(2) 0.0150(2) 0.31140(17) 0.0979(9) Uani 1 1 d D . . . .
 F6 F 0.8256(3) -0.0134(4) 0.3381(2) 0.1362(16) Uani 1 1 d D . . . .
 F8 F 0.9449(4) -0.1127(3) 0.3402(2) 0.151(2) Uani 1 1 d D . . . .
 B2 B 0.9041(5) -0.0376(4) 0.3058(3) 0.0969(18) Uani 1 1 d D . . . .
 F14 F 0.1430(2) 0.56985(19) 0.40152(17) 0.0963(9) Uani 1 1 d D . . . .
 F16 F 0.0749(3) 0.6593(4) 0.3092(2) 0.1492(19) Uani 1 1 d D . . . .
 F13 F 0.0068(3) 0.6449(3) 0.4057(3) 0.157(2) Uani 1 1 d D . . . .
 F15 F 0.1150(5) 0.7033(3) 0.3925(3) 0.177(2) Uani 1 1 d D . . . .
 B4 B 0.0829(5) 0.6420(5) 0.3769(3) 0.118(2) Uani 1 1 d D . . . .
 N1S2 N 0.1182(8) 0.7756(8) 0.1294(5) 0.095(4) Uiso 0.63(2) 1 d D . P C 1
 N1S1 N 0.0797(4) 0.2501(3) 0.0785(3) 0.1077(16) Uani 1 1 d D . . . .
 C1S2 C 0.1129(8) 0.8032(5) 0.1773(4) 0.071(2) Uiso 0.63(2) 1 d D . P C 1
 C1S1 C 0.1455(4) 0.2113(4) 0.0666(4) 0.1020(18) Uani 1 1 d D . . . .
 C2S2 C 0.1008(8) 0.8338(7) 0.2402(5) 0.102(4) Uiso 0.63(2) 1 d D . P C 1
 C2S1 C 0.2334(6) 0.1607(7) 0.0491(7) 0.160(4) Uani 1 1 d D . . . .
 H2SA H 0.231114 0.153866 0.002567 0.241 Uiso 1 1 calc R U . . .
 H2SB H 0.249541 0.107748 0.077875 0.241 Uiso 1 1 calc R U . . .
 H2SC H 0.276599 0.187628 0.055489 0.241 Uiso 1 1 calc R U . . .
 O1ET O -0.0398(6) 0.4275(6) 0.2780(5) 0.189(3) Uiso 1 1 d D . . . .
 C1ET C -0.0308(8) 0.2908(7) 0.2784(6) 0.163(4) Uiso 1 1 d D . . . .
 C2ET C -0.0632(8) 0.3739(6) 0.2589(6) 0.151(3) Uiso 1 1 d D . . . .
 C3ET C -0.0531(9) 0.5153(7) 0.2569(7) 0.169(4) Uiso 1 1 d D . . . .
 C4ET C -0.1560(11) 0.5514(12) 0.2486(11) 0.250(8) Uiso 1 1 d D . . . .
 O1F O 0.5908(9) 0.0173(8) 0.2936(8) 0.101(5) Uani 0.481(19) 1 d D . P B 2
 C19F C 0.4111(9) 0.1061(14) 0.4249(10) 0.082(5) Uani 0.481(19) 1 d D . P B 2
 C17F C 0.5547(9) 0.0791(9) 0.3896(10) 0.086(5) Uani 0.481(19) 1 d D . P B 2
 H17F H 0.612968 0.078902 0.394701 0.103 Uiso 0.481(19) 1 calc R U P B 2
 C18F C 0.4946(8) 0.1092(10) 0.4332(11) 0.082(4) Uani 0.481(19) 1 d D . P B 2
 H18F H 0.509759 0.131920 0.468589 0.099 Uiso 0.481(19) 1 calc R U P B 2
 C16F C 0.5291(10) 0.0492(12) 0.3383(9) 0.087(5) Uani 0.481(19) 1 d D . P B 2
 C20F C 0.3876(9) 0.0708(11) 0.3758(7) 0.085(5) Uani 0.481(19) 1 d D . P B 2
 H20F H 0.330253 0.068112 0.372113 0.102 Uiso 0.481(19) 1 calc R U P B 2
 C13F C 0.6059(9) 0.0732(9) 0.2434(7) 0.077(4) Uani 0.481(19) 1 d D . P B 2
 C21F C 0.4483(10) 0.0395(13) 0.3321(8) 0.095(5) Uani 0.481(19) 1 d D . P B 2
 H21F H 0.435183 0.012429 0.299029 0.114 Uiso 0.481(19) 1 calc R U P B 2
 C10F C 0.6498(11) 0.1712(12) 0.1429(10) 0.088(7) Uani 0.481(19) 1 d D . P B
 2
 C15F C 0.7033(13) 0.0936(12) 0.1611(11) 0.095(7) Uani 0.481(19) 1 d D . P B
 2
 H15F H 0.754680 0.075074 0.138237 0.114 Uiso 0.481(19) 1 calc R U P B 2
 C14F C 0.6826(11) 0.0426(12) 0.2122(10) 0.096(8) Uani 0.481(19) 1 d D . P B
 2
 H14F H 0.719036 -0.011241 0.225741 0.115 Uiso 0.481(19) 1 calc R U P B 2
 C11F C 0.5739(9) 0.2034(12) 0.1736(10) 0.115(7) Uani 0.481(19) 1 d D . P B 2
 H11F H 0.537823 0.257281 0.159872 0.138 Uiso 0.481(19) 1 calc R U P B 2
 C12F C 0.5540(9) 0.1520(10) 0.2256(9) 0.108(7) Uani 0.481(19) 1 d D . P B 2
 H12F H 0.503655 0.171389 0.249486 0.129 Uiso 0.481(19) 1 calc R U P B 2
 O1D O 0.2949(4) 0.4246(5) 0.1383(3) 0.0577(18) Uiso 0.411(8) 1 d D . P A 2
 C10D C 0.5544(6) 0.4143(7) 0.1154(5) 0.063(3) Uiso 0.411(8) 1 d D . P A 2
 C15D C 0.4990(5) 0.4236(6) 0.0645(5) 0.054(2) Uiso 0.411(8) 1 d D . P A 2
 H15D H 0.519119 0.428944 0.020754 0.065 Uiso 0.411(8) 1 calc R U P A 2
 C13D C 0.3829(6) 0.4204(7) 0.1333(4) 0.060(2) Uiso 0.411(8) 1 d D . P A 2
 C14D C 0.4130(5) 0.4260(6) 0.0725(4) 0.051(2) Uiso 0.411(8) 1 d D . P A 2
 H14D H 0.376080 0.431532 0.034873 0.061 Uiso 0.411(8) 1 calc R U P A 2
 C12D C 0.4372(8) 0.4161(11) 0.1844(7) 0.106(5) Uiso 0.411(8) 1 d D . P A 2
 H12D H 0.416917 0.413934 0.228187 0.127 Uiso 0.411(8) 1 calc R U P A 2
 C19D C 0.2259(6) 0.2773(6) 0.2929(5) 0.055(3) Uiso 0.411(8) 1 d D . P A 2
 C20D C 0.1841(6) 0.3579(6) 0.2821(5) 0.055(3) Uiso 0.411(8) 1 d D . P A 2
 H20D H 0.138344 0.380046 0.309212 0.066 Uiso 0.411(8) 1 calc R U P A 2
 C21D C 0.2089(6) 0.4072(7) 0.2311(5) 0.063(3) Uiso 0.411(8) 1 d D . P A 2
 H21D H 0.181115 0.463770 0.224299 0.075 Uiso 0.411(8) 1 calc R U P A 2
 C16D C 0.2728(5) 0.3757(5) 0.1906(4) 0.052(2) Uiso 0.411(8) 1 d D . P A 2
 C18D C 0.2926(8) 0.2445(8) 0.2533(6) 0.082(3) Uiso 0.411(8) 1 d D . P A 2
 H18D H 0.323420 0.188547 0.262482 0.098 Uiso 0.411(8) 1 calc R U P A 2
 C17D C 0.3139(8) 0.2938(6) 0.2002(6) 0.074(3) Uiso 0.411(8) 1 d D . P A 2
 H17D H 0.356437 0.271415 0.170832 0.088 Uiso 0.411(8) 1 calc R U P A 2
 C11D C 0.5204(8) 0.4149(10) 0.1746(6) 0.091(4) Uiso 0.411(8) 1 d D . P A 2
 H11D H 0.555713 0.414477 0.211664 0.110 Uiso 0.411(8) 1 calc R U P A 2
 O1W O 0.500000 0.000000 0.000000 0.149(6) Uiso 0.5 2 d S . P . .
 B3A B 0.2366(3) -0.0116(3) 0.2299(2) 0.103(3) Uani 0.596(12) 1 d DG . P D 1
 F11A F 0.2706(5) -0.0449(5) 0.2950(2) 0.118(3) Uani 0.596(12) 1 d DG . P D 1
 F9A F 0.1470(4) 0.0254(6) 0.2310(4) 0.149(4) Uani 0.596(12) 1 d DG . P D 1
 F10A F 0.2761(6) 0.0459(4) 0.2024(4) 0.152(4) Uani 0.596(12) 1 d DG . P D 1
 F12A F 0.2526(5) -0.0727(5) 0.1914(3) 0.109(3) Uani 0.596(12) 1 d DG . P D 1
 B1 B 0.2093(5) -0.0067(5) 0.2451(3) 0.112(5) Uani 0.404(12) 1 d DG . P D 2
 F11B F 0.2097(9) -0.0674(6) 0.2990(4) 0.132(5) Uani 0.404(12) 1 d DG . P D 2
 F9B F 0.1301(4) 0.0552(7) 0.2405(5) 0.121(5) Uani 0.404(12) 1 d DG . P D 2
 F10B F 0.2773(4) 0.0243(6) 0.2546(6) 0.120(5) Uani 0.404(12) 1 d DG . P D 2
 F12B F 0.2199(10) -0.0389(8) 0.1862(4) 0.150(7) Uani 0.404(12) 1 d DG . P D
 2
 B1A B 0.4105(5) 0.2868(4) -0.0853(4) 0.126(6) Uiso 0.508(13) 1 d DG . P E 1
 F2A F 0.4414(7) 0.3528(5) -0.1034(6) 0.148(4) Uiso 0.508(13) 1 d DG . P E 1
 F1A F 0.3253(5) 0.3138(7) -0.0653(6) 0.171(6) Uiso 0.508(13) 1 d DG . P E 1
 F3A F 0.4123(8) 0.2476(6) -0.1398(5) 0.171(5) Uiso 0.508(13) 1 d DG . P E 1
 F4A F 0.4632(6) 0.2330(5) -0.0326(5) 0.152(4) Uiso 0.508(13) 1 d DG . P E 1
 B1B B 0.3967(4) 0.2859(3) -0.0536(4) 0.107(5) Uiso 0.492(13) 1 d DG . P E 2
 F2B F 0.4182(5) 0.3578(4) -0.0666(5) 0.107(3) Uiso 0.492(13) 1 d DG . P E 2
 F1B F 0.3071(4) 0.3030(5) -0.0639(4) 0.102(3) Uiso 0.492(13) 1 d DG . P E 2
 F3B F 0.4401(6) 0.2343(6) -0.0966(7) 0.227(8) Uiso 0.492(13) 1 d DG . P E 2
 F4B F 0.4216(7) 0.2485(6) 0.0123(5) 0.171(5) Uiso 0.492(13) 1 d DG . P E 2
 N1S4 N 0.6780(6) 0.1140(5) 0.5156(4) 0.083(2) Uiso 0.542(12) 1 d DG . P F 1
 C1S4 C 0.6916(6) 0.1559(6) 0.5497(5) 0.106(4) Uiso 0.542(12) 1 d DG . P F 1
 C2S4 C 0.7085(14) 0.2081(11) 0.5924(9) 0.189(9) Uiso 0.542(12) 1 d DG . P F
 1
 H2SD H 0.766966 0.212155 0.585717 0.283 Uiso 0.542(12) 1 calc R U P F 1
 H2SE H 0.703935 0.185632 0.638909 0.283 Uiso 0.542(12) 1 calc R U P F 1
 H2SF H 0.666032 0.261858 0.581172 0.283 Uiso 0.542(12) 1 calc R U P F 1
 N1T4 N 0.6772(6) 0.0728(6) 0.5028(5) 0.082(3) Uiso 0.458(12) 1 d DG . P F 2
 C1T4 C 0.6540(7) 0.1014(6) 0.5495(5) 0.103(4) Uiso 0.458(12) 1 d DG . P F 2
 C2T4 C 0.6249(14) 0.1371(13) 0.6080(8) 0.170(10) Uiso 0.458(12) 1 d DG . P F
 2
 H2TA H 0.636152 0.094594 0.647309 0.255 Uiso 0.458(12) 1 calc R U P F 2
 H2TB H 0.562618 0.165734 0.602389 0.255 Uiso 0.458(12) 1 calc R U P F 2
 H2TC H 0.656248 0.175109 0.613823 0.255 Uiso 0.458(12) 1 calc R U P F 2
 N1T2 N 0.1304(11) 0.7879(11) 0.1319(7) 0.074(5) Uiso 0.37(2) 1 d D . P C 2
 C1T2 C 0.1465(19) 0.7920(13) 0.1855(8) 0.093(6) Uiso 0.37(2) 1 d D . P C 2
 C2T2 C 0.1631(18) 0.8046(14) 0.2522(9) 0.118(8) Uiso 0.37(2) 1 d D . P C 2
 N1S3 N 0.6435(11) 0.5237(9) 0.2288(8) 0.150 Uiso 0.5 1 d G U P G 1
 C1S3 C 0.6172(8) 0.5911(9) 0.2343(6) 0.150 Uiso 0.5 1 d G U P G 1
 C2S3 C 0.5844(13) 0.6754(9) 0.2411(11) 0.150 Uiso 0.5 1 d G U P G 1

loop_
  _atom_site_aniso_label
  _atom_site_aniso_U_11
  _atom_site_aniso_U_22
  _atom_site_aniso_U_33
  _atom_site_aniso_U_23
  _atom_site_aniso_U_13
  _atom_site_aniso_U_12
 Ni2 0.0495(3) 0.0770(4) 0.0646(4) 0.0081(3) 0.0064(2) -0.0173(3)
 Ni1 0.0564(4) 0.1031(5) 0.0553(4) -0.0010(3) 0.0051(2) -0.0306(3)
 N7A 0.0478(17) 0.086(2) 0.0598(19) -0.0048(17) 0.0054(14) -0.0212(16)
 N2A 0.0574(19) 0.075(2) 0.0484(17) 0.0018(14) 0.0051(14) -0.0150(15)
 O1B 0.0588(19) 0.179(4) 0.077(2) -0.038(2) 0.0176(16) -0.048(2)
 N6B 0.0528(19) 0.076(2) 0.070(2) 0.0037(17) 0.0040(16) -0.0186(16)
 N6A 0.0509(18) 0.082(2) 0.061(2) -0.0005(17) 0.0086(15) -0.0180(16)
 N2B 0.071(2) 0.080(2) 0.0556(19) -0.0010(16) 0.0055(16) -0.0293(18)
 N5B 0.0505(19) 0.083(2) 0.065(2) 0.0075(17) 0.0049(15) -0.0234(17)
 N7B 0.0554(19) 0.080(2) 0.0594(19) -0.0060(16) 0.0020(15) -0.0162(16)
 N5C 0.056(2) 0.081(2) 0.068(2) 0.0170(18) 0.0040(16) -0.0208(17)
 N3B 0.072(2) 0.086(2) 0.0534(19) 0.0022(17) 0.0029(17) -0.0322(19)
 N3A 0.055(2) 0.091(2) 0.0554(19) -0.0038(17) 0.0066(15) -0.0224(18)
 N1A 0.087(3) 0.093(3) 0.0525(19) 0.0047(17) 0.0052(17) -0.043(2)
 N6C 0.060(2) 0.080(2) 0.065(2) -0.0002(17) 0.0103(16) -0.0287(17)
 N4B 0.063(2) 0.114(3) 0.0493(18) -0.0062(18) 0.0029(16) -0.037(2)
 N7C 0.087(3) 0.084(2) 0.065(2) 0.0016(18) 0.0105(19) -0.039(2)
 N5A 0.057(2) 0.105(3) 0.062(2) 0.010(2) 0.0096(17) -0.020(2)
 N3C 0.063(2) 0.098(3) 0.0540(19) 0.0099(18) 0.0033(16) -0.0305(19)
 N4C 0.068(2) 0.111(3) 0.0498(19) 0.0038(19) 0.0032(16) -0.037(2)
 N4A 0.056(2) 0.111(3) 0.071(2) 0.004(2) 0.0061(18) -0.025(2)
 N8A 0.056(2) 0.086(3) 0.096(3) -0.003(2) -0.011(2) -0.0210(18)
 N2C 0.083(3) 0.114(3) 0.068(2) 0.022(2) 0.001(2) -0.032(3)
 C28A 0.0412(19) 0.085(3) 0.067(2) -0.007(2) 0.0048(17) -0.0182(18)
 C25A 0.050(2) 0.077(2) 0.057(2) -0.0024(19) 0.0067(16) -0.0134(18)
 C2A 0.061(2) 0.070(2) 0.0448(18) 0.0069(16) 0.0052(16) -0.0205(18)
 C8B 0.073(3) 0.094(3) 0.051(2) 0.001(2) -0.0003(19) -0.036(2)
 N1B 0.101(3) 0.091(3) 0.089(3) -0.013(2) 0.020(2) -0.032(2)
 C3A 0.063(2) 0.076(2) 0.0408(18) 0.0073(16) 0.0079(16) -0.0213(19)
 C6B 0.064(2) 0.086(3) 0.054(2) -0.0002(19) 0.0034(18) -0.031(2)
 C22B 0.063(2) 0.079(3) 0.060(2) -0.0016(19) 0.0093(19) -0.026(2)
 C6A 0.057(2) 0.084(3) 0.055(2) 0.0002(19) 0.0076(17) -0.0223(19)
 N8B 0.071(3) 0.107(4) 0.107(4) -0.036(3) 0.006(2) -0.004(3)
 O1C 0.069(5) 0.074(4) 0.061(4) -0.008(3) 0.023(3) -0.032(3)
 C1A 0.065(2) 0.096(3) 0.046(2) 0.0037(19) 0.0037(17) -0.032(2)
 C28B 0.057(2) 0.090(3) 0.057(2) -0.011(2) 0.0004(18) -0.016(2)
 C24B 0.058(2) 0.080(3) 0.057(2) -0.0028(19) 0.0023(17) -0.0194(19)
 C3B 0.068(3) 0.079(3) 0.066(2) -0.007(2) 0.010(2) -0.030(2)
 C7A 0.057(2) 0.084(3) 0.051(2) 0.0036(19) 0.0103(17) -0.009(2)
 C22C 0.061(2) 0.077(3) 0.064(2) 0.012(2) 0.0035(19) -0.015(2)
 C24A 0.058(2) 0.102(3) 0.061(2) -0.005(2) 0.0110(19) -0.032(2)
 C8A 0.054(2) 0.099(3) 0.054(2) -0.001(2) 0.0119(17) -0.014(2)
 C25B 0.054(2) 0.075(3) 0.067(2) 0.003(2) -0.0016(18) -0.0185(19)
 C23B 0.057(2) 0.077(3) 0.060(2) -0.0011(19) 0.0057(18) -0.0199(19)
 C9A 0.047(2) 0.121(4) 0.053(2) 0.007(2) 0.0004(17) -0.010(2)
 C23A 0.048(2) 0.106(3) 0.059(2) 0.002(2) 0.0087(17) -0.021(2)
 C9B 0.064(3) 0.100(3) 0.054(2) -0.002(2) 0.0033(19) -0.033(2)
 C19C 0.064(7) 0.077(9) 0.049(7) 0.014(5) 0.011(5) -0.020(6)
 C10B 0.053(2) 0.115(3) 0.058(2) -0.007(2) 0.0033(18) -0.028(2)
 C4A 0.071(3) 0.080(3) 0.053(2) -0.0024(19) 0.0099(18) -0.022(2)
 C23C 0.069(3) 0.078(3) 0.066(3) 0.010(2) -0.002(2) -0.024(2)
 C29A 0.065(3) 0.102(3) 0.074(3) -0.001(2) 0.001(2) -0.041(2)
 C10C 0.059(5) 0.075(6) 0.044(5) 0.002(5) -0.002(4) -0.026(5)
 C7B 0.074(3) 0.088(3) 0.054(2) -0.002(2) 0.0059(19) -0.031(2)
 C15C 0.059(7) 0.073(7) 0.054(7) -0.004(5) -0.002(5) -0.023(5)
 C5A 0.099(4) 0.078(3) 0.058(2) -0.001(2) 0.011(2) -0.035(3)
 C27A 0.070(3) 0.087(3) 0.069(3) -0.009(2) -0.006(2) -0.018(2)
 N8C 0.140(5) 0.140(5) 0.074(3) -0.018(3) 0.016(3) -0.070(4)
 C25C 0.066(3) 0.084(3) 0.071(3) 0.002(2) 0.004(2) -0.030(2)
 C16B 0.053(2) 0.116(4) 0.068(3) -0.008(2) 0.0065(19) -0.031(2)
 C30A 0.069(3) 0.104(4) 0.073(3) -0.007(3) -0.001(2) -0.039(3)
 C15B 0.059(3) 0.116(4) 0.066(3) -0.002(3) 0.003(2) -0.018(2)
 C19B 0.053(2) 0.077(3) 0.070(2) 0.005(2) 0.0068(18) -0.0201(19)
 C22A 0.058(2) 0.116(4) 0.064(3) -0.002(2) 0.010(2) -0.037(3)
 C11B 0.074(3) 0.124(4) 0.057(2) -0.005(2) 0.008(2) -0.040(3)
 C14C 0.071(6) 0.058(6) 0.059(8) -0.001(5) 0.004(6) -0.023(5)
 C8C 0.079(3) 0.109(4) 0.053(2) 0.012(2) -0.003(2) -0.041(3)
 C24C 0.083(3) 0.084(3) 0.072(3) 0.003(2) 0.000(2) -0.020(3)
 C28C 0.104(4) 0.091(3) 0.069(3) -0.013(2) 0.021(2) -0.052(3)
 C17C 0.053(6) 0.092(9) 0.065(8) -0.006(6) 0.007(5) -0.030(5)
 C2B 0.097(4) 0.090(3) 0.062(3) 0.000(2) 0.007(2) -0.027(3)
 C12B 0.084(3) 0.146(4) 0.056(2) -0.018(3) 0.008(2) -0.060(3)
 C13B 0.052(2) 0.148(4) 0.060(2) -0.018(3) 0.0095(19) -0.040(3)
 C6C 0.065(3) 0.091(3) 0.064(3) 0.004(2) 0.008(2) -0.021(2)
 C14B 0.055(3) 0.128(4) 0.077(3) -0.015(3) 0.003(2) -0.019(3)
 C27B 0.068(3) 0.091(3) 0.069(3) -0.020(2) 0.003(2) -0.009(2)
 C29B 0.058(3) 0.101(4) 0.102(4) -0.024(3) 0.000(2) -0.018(2)
 C1B 0.087(3) 0.101(4) 0.072(3) -0.011(2) 0.009(2) -0.025(3)
 C9C 0.088(3) 0.112(4) 0.054(2) 0.004(2) 0.002(2) -0.050(3)
 C20B 0.059(3) 0.124(4) 0.078(3) -0.028(3) 0.016(2) -0.024(3)
 C26A 0.075(3) 0.090(3) 0.088(3) -0.011(3) -0.012(3) -0.027(3)
 C21B 0.061(3) 0.133(4) 0.066(3) -0.029(3) 0.014(2) -0.030(3)
 C18C 0.082(8) 0.085(8) 0.063(7) -0.013(6) 0.018(5) -0.041(6)
 C4B 0.098(4) 0.081(3) 0.069(3) 0.005(2) 0.013(2) -0.026(3)
 C29C 0.099(4) 0.129(5) 0.079(3) -0.026(3) 0.020(3) -0.051(4)
 C17B 0.070(3) 0.176(6) 0.055(2) 0.006(3) 0.005(2) -0.056(4)
 C16C 0.060(6) 0.068(6) 0.056(5) -0.001(4) 0.012(4) -0.025(5)
 C30B 0.057(3) 0.135(5) 0.121(5) -0.054(4) 0.005(3) -0.023(3)
 C5B 0.096(4) 0.088(3) 0.096(4) -0.005(3) 0.028(3) -0.018(3)
 C20C 0.070(6) 0.079(8) 0.058(6) 0.011(5) 0.015(4) -0.035(5)
 C26B 0.070(3) 0.098(4) 0.091(4) -0.028(3) -0.004(3) -0.011(3)
 C18B 0.064(3) 0.165(6) 0.058(2) 0.014(3) -0.002(2) -0.051(3)
 C7C 0.102(4) 0.152(6) 0.069(3) 0.013(3) -0.021(3) -0.064(4)
 C13C 0.069(5) 0.055(5) 0.063(5) -0.012(4) 0.017(4) -0.024(4)
 C30C 0.114(5) 0.152(6) 0.079(3) -0.027(4) 0.027(3) -0.061(5)
 C21C 0.066(6) 0.097(9) 0.082(7) -0.018(7) 0.019(5) -0.043(6)
 C27C 0.109(5) 0.185(7) 0.078(3) -0.022(4) 0.019(3) -0.081(5)
 C26C 0.136(5) 0.178(8) 0.080(4) -0.035(4) 0.016(4) -0.070(6)
 C11C 0.067(5) 0.070(5) 0.059(5) 0.005(4) 0.012(4) -0.020(4)
 C12C 0.069(5) 0.083(6) 0.063(6) 0.006(4) 0.019(4) -0.025(4)
 F7 0.102(2) 0.125(3) 0.0711(18) -0.0104(17) -0.0153(16) -0.0123(19)
 F5 0.092(2) 0.101(2) 0.090(2) 0.0041(16) -0.0063(16) -0.0247(17)
 F6 0.133(3) 0.206(5) 0.097(3) -0.048(3) 0.020(2) -0.082(3)
 F8 0.217(5) 0.118(3) 0.113(3) 0.011(2) -0.075(3) -0.059(3)
 B2 0.112(5) 0.087(4) 0.082(4) -0.012(3) -0.019(3) -0.016(3)
 F14 0.114(2) 0.0847(18) 0.088(2) 0.0030(15) 0.0253(18) -0.0363(17)
 F16 0.120(3) 0.200(5) 0.094(3) 0.023(3) 0.024(2) -0.026(3)
 F13 0.141(4) 0.133(3) 0.137(4) 0.039(3) 0.064(3) 0.011(3)
 F15 0.253(7) 0.101(3) 0.181(5) -0.023(3) 0.083(5) -0.060(4)
 B4 0.143(6) 0.111(5) 0.078(4) 0.021(4) 0.029(4) -0.027(4)
 N1S1 0.084(3) 0.089(3) 0.143(5) -0.006(3) 0.001(3) -0.023(2)
 C1S1 0.071(3) 0.093(4) 0.140(6) -0.024(4) -0.003(3) -0.021(3)
 C2S1 0.097(5) 0.149(8) 0.231(13) -0.051(8) 0.024(6) -0.022(5)
 O1F 0.092(8) 0.093(7) 0.096(8) 0.017(6) 0.042(6) -0.016(5)
 C19F 0.050(7) 0.073(9) 0.090(10) 0.036(6) 0.019(6) 0.002(6)
 C17F 0.056(7) 0.072(7) 0.105(11) 0.029(7) 0.017(7) -0.009(5)
 C18F 0.058(6) 0.064(8) 0.105(11) 0.026(7) 0.026(6) -0.010(5)
 C16F 0.065(8) 0.090(15) 0.084(12) 0.030(7) 0.026(8) -0.015(7)
 C20F 0.056(6) 0.100(11) 0.067(7) 0.043(6) 0.021(4) -0.007(6)
 C13F 0.083(8) 0.079(7) 0.072(8) -0.005(6) 0.039(6) -0.034(5)
 C21F 0.068(9) 0.127(14) 0.071(7) 0.018(7) 0.017(6) -0.020(8)
 C10F 0.075(8) 0.140(13) 0.057(9) -0.004(8) 0.014(6) -0.052(7)
 C15F 0.107(14) 0.122(12) 0.072(11) -0.030(9) 0.047(11) -0.054(9)
 C14F 0.086(11) 0.123(14) 0.070(11) -0.013(9) 0.045(10) -0.021(9)
 C11F 0.079(8) 0.114(11) 0.124(14) 0.036(10) 0.027(8) -0.021(7)
 C12F 0.073(7) 0.120(10) 0.099(11) 0.036(9) 0.022(7) -0.012(7)
 B3A 0.084(6) 0.133(9) 0.087(7) -0.022(6) 0.000(6) -0.024(6)
 F11A 0.102(5) 0.163(7) 0.090(4) -0.018(4) -0.001(3) -0.043(5)
 F9A 0.077(4) 0.253(11) 0.114(7) -0.087(7) -0.006(4) -0.017(5)
 F10A 0.182(9) 0.134(6) 0.150(9) -0.008(6) 0.001(7) -0.072(6)
 F12A 0.115(6) 0.121(6) 0.100(5) -0.023(4) 0.011(4) -0.047(5)
 B1 0.097(10) 0.170(14) 0.083(9) -0.026(7) -0.022(9) -0.057(8)
 F11B 0.148(12) 0.154(9) 0.107(7) -0.024(6) -0.009(6) -0.064(7)
 F9B 0.077(5) 0.238(12) 0.055(5) -0.012(7) 0.005(4) -0.066(6)
 F10B 0.052(4) 0.146(9) 0.166(12) -0.040(9) -0.004(5) -0.029(5)
 F12B 0.23(2) 0.116(10) 0.100(7) -0.026(7) -0.028(9) -0.052(11)

_geom_special_details
;
 All esds (except the esd in the dihedral angle between two l.s. planes)
 are estimated using the full covariance matrix.  The cell esds are taken
 into account individually in the estimation of esds in distances, angles
 and torsion angles; correlations between esds in cell parameters are only
 used when they are defined by crystal symmetry.  An approximate (isotropic)
 treatment of cell esds is used for estimating esds involving l.s. planes.
;
loop_
  _geom_bond_atom_site_label_1
  _geom_bond_atom_site_label_2
  _geom_bond_distance
  _geom_bond_site_symmetry_2
  _geom_bond_publ_flag
 Ni2 N6B 2.085(4) . ?
 Ni2 N6A 2.067(4) . ?
 Ni2 N5B 2.134(4) . ?
 Ni2 N5C 2.146(4) . ?
 Ni2 N6C 2.084(4) . ?
 Ni2 N5A 2.151(4) . ?
 Ni1 N3B 2.040(4) . ?
 Ni1 N3A 2.075(4) . ?
 Ni1 N4B 2.152(4) . ?
 Ni1 N3C 2.085(4) . ?
 Ni1 N4C 2.130(4) . ?
 Ni1 N4A 2.145(5) . ?
 N7A C28A 1.434(6) . ?
 N7A C25A 1.366(6) . ?
 N7A C24A 1.384(6) . ?
 N2A C3A 1.425(6) . ?
 N2A C6A 1.393(6) . ?
 N2A C7A 1.377(6) . ?
 O1B C16B 1.389(6) . ?
 O1B C13B 1.408(6) . ?
 N6B C25B 1.307(6) . ?
 N6B C23B 1.390(6) . ?
 N6A C25A 1.306(6) . ?
 N6A C23A 1.382(6) . ?
 N2B C6B 1.365(6) . ?
 N2B C3B 1.431(6) . ?
 N2B C7B 1.390(6) . ?
 N5B C22B 1.270(6) . ?
 N5B C19B 1.455(6) . ?
 N7B C28B 1.412(6) . ?
 N7B C24B 1.380(6) . ?
 N7B C25B 1.367(6) . ?
 N5C C22C 1.280(6) . ?
 N5C C19C 1.463(11) . ?
 N5C C19F 1.412(12) . ?
 N3B C8B 1.392(6) . ?
 N3B C6B 1.316(6) . ?
 N3A C6A 1.315(6) . ?
 N3A C8A 1.389(7) . ?
 N1A C1A 1.315(7) . ?
 N1A C5A 1.332(7) . ?
 N6C C23C 1.392(6) . ?
 N6C C25C 1.295(7) . ?
 N4B C9B 1.294(7) . ?
 N4B C10B 1.441(6) . ?
 N7C C25C 1.379(7) . ?
 N7C C24C 1.363(7) . ?
 N7C C28C 1.424(7) . ?
 N5A C19A 1.448(7) . ?
 N5A C22A 1.281(7) . ?
 N5A C19D 1.516(9) . ?
 N3C C8C 1.371(6) . ?
 N3C C6C 1.319(6) . ?
 N4C C10C 1.474(10) . ?
 N4C C9C 1.251(6) . ?
 N4C C10F 1.431(12) . ?
 N4A C9A 1.300(8) . ?
 N4A C10A 1.477(8) . ?
 N4A C10D 1.430(10) . ?
 N8A C30A 1.314(7) . ?
 N8A C26A 1.320(7) . ?
 O1A C16A 1.384(8) . ?
 O1A C13A 1.403(8) . ?
 N2C C6C 1.370(7) . ?
 N2C C7C 1.352(7) . ?
 N2C C3C 1.426(8) . ?
 C28A C29A 1.379(7) . ?
 C28A C27A 1.366(7) . ?
 C25A H25A 0.9500 . ?
 C2A H2A 0.9500 . ?
 C2A C3A 1.383(6) . ?
 C2A C1A 1.384(6) . ?
 C8B C9B 1.444(7) . ?
 C8B C7B 1.353(7) . ?
 N1B C1B 1.331(7) . ?
 N1B C5B 1.319(7) . ?
 C3A C4A 1.387(7) . ?
 C6B H6B 0.9500 . ?
 C22B H22B 0.9500 . ?
 C22B C23B 1.438(6) . ?
 C6A H6A 0.9500 . ?
 N8B C30B 1.385(9) . ?
 N8B C26B 1.300(8) . ?
 O1C C16C 1.415(11) . ?
 O1C C13C 1.382(10) . ?
 C1A H1A 0.9500 . ?
 C28B C27B 1.395(8) . ?
 C28B C29B 1.396(8) . ?
 C24B H24B 0.9500 . ?
 C24B C23B 1.363(6) . ?
 C3B C2B 1.384(6) . ?
 C3B C4B 1.365(7) . ?
 C7A H7A 0.9500 . ?
 C7A C8A 1.353(7) . ?
 C22C H22C 0.9500 . ?
 C22C C23C 1.457(7) . ?
 C24A H24A 0.9500 . ?
 C24A C23A 1.368(8) . ?
 C8A C9A 1.468(7) . ?
 C25B H25B 0.9500 . ?
 C23A C22A 1.416(7) . ?
 C9B H9B 0.9500 . ?
 C19C C18C 1.392(11) . ?
 C19C C20C 1.397(11) . ?
 C10B C15B 1.380(7) . ?
 C10B C11B 1.388(7) . ?
 C4A H4A 0.9500 . ?
 C4A C5A 1.382(7) . ?
 C23C C24C 1.344(7) . ?
 C29A H29A 0.9500 . ?
 C29A C30A 1.361(7) . ?
 C10C C15C 1.391(10) . ?
 C10C C11C 1.391(11) . ?
 C7B H7B 0.9500 . ?
 C15C H15C 0.9500 . ?
 C15C C14C 1.390(10) . ?
 C5A H5A 0.9500 . ?
 C27A H27A 0.9500 . ?
 C27A C26A 1.378(8) . ?
 N8C C30C 1.306(8) . ?
 N8C C26C 1.309(9) . ?
 C25C H25C 0.9500 . ?
 C19A C20A 1.354(10) . ?
 C19A C18A 1.367(9) . ?
 C16B C21B 1.367(6) . ?
 C16B C17B 1.387(7) . ?
 C30A H30A 0.9500 . ?
 C15B H15B 0.9500 . ?
 C15B C14B 1.404(7) . ?
 C19B C20B 1.373(7) . ?
 C19B C18B 1.383(7) . ?
 C22A H22A 0.9500 . ?
 C11B H11B 0.9500 . ?
 C11B C12B 1.382(7) . ?
 C14C H14C 0.9500 . ?
 C14C C13C 1.386(11) . ?
 C8C C9C 1.463(6) . ?
 C8C C7C 1.356(7) . ?
 C24C H24C 0.9500 . ?
 C28C C29C 1.378(8) . ?
 C28C C27C 1.374(8) . ?
 C17C H17C 0.9500 . ?
 C17C C18C 1.380(11) . ?
 C17C C16C 1.375(11) . ?
 C2B H2B 0.9500 . ?
 C2B C1B 1.381(7) . ?
 C12B C13B 1.341(8) . ?
 C13B C14B 1.391(7) . ?
 C6C H6C 0.9500 . ?
 C14B H14B 0.9500 . ?
 C20A H20A 0.9500 . ?
 C20A C21A 1.395(9) . ?
 C27B H27B 0.9500 . ?
 C27B C26B 1.367(8) . ?
 C29B H29B 0.9500 . ?
 C29B C30B 1.379(8) . ?
 C1B H1B 0.9500 . ?
 C10A C15A 1.389(8) . ?
 C10A C11A 1.393(9) . ?
 C15A H15A 0.9500 . ?
 C15A C14A 1.384(8) . ?
 C9C H9C 0.9500 . ?
 C20B H20B 0.9500 . ?
 C20B C21B 1.387(6) . ?
 C26A H26A 0.9500 . ?
 C21B H21B 0.9500 . ?
 C18C H18C 0.9500 . ?
 C4B H4B 0.9500 . ?
 C4B C5B 1.404(7) . ?
 C21A H21A 0.9500 . ?
 C21A C16A 1.350(9) . ?
 C29C H29C 0.9500 . ?
 C29C C30C 1.380(8) . ?
 C16A C17A 1.370(9) . ?
 C17B H17B 0.9500 . ?
 C17B C18B 1.383(6) . ?
 C16C C21C 1.380(10) . ?
 C30B H30B 0.9500 . ?
 C5B H5B 0.9500 . ?
 C13A C14A 1.388(9) . ?
 C13A C12A 1.407(9) . ?
 C20C H20C 0.9500 . ?
 C20C C21C 1.381(11) . ?
 C14A H14A 0.9500 . ?
 C18A H18A 0.9500 . ?
 C18A C17A 1.374(8) . ?
 C26B H26B 0.9500 . ?
 C18B H18B 0.9500 . ?
 C7C H7C 0.9500 . ?
 C13C C12C 1.368(10) . ?
 C30C H30C 0.9500 . ?
 C2C H2C 0.9500 . ?
 C2C C3C 1.384(8) . ?
 C2C C1C 1.391(10) . ?
 C21C H21C 0.9500 . ?
 C17A H17A 0.9500 . ?
 C27C H27C 0.9500 . ?
 C27C C26C 1.381(8) . ?
 C26C H26C 0.9500 . ?
 C3C C4C 1.395(10) . ?
 C11C H11C 0.9500 . ?
 C11C C12C 1.394(9) . ?
 C1C H1C 0.9500 . ?
 C1C N1C 1.320(11) . ?
 C11A H11A 0.9500 . ?
 C11A C12A 1.377(9) . ?
 C12A H12A 0.9500 . ?
 N1C C5C 1.356(12) . ?
 C12C H12C 0.9500 . ?
 C4C H4C 0.9500 . ?
 C4C C5C 1.395(11) . ?
 C5C H5C 0.9500 . ?
 F7 B2 1.388(7) . ?
 F5 B2 1.382(7) . ?
 F6 B2 1.412(8) . ?
 F8 B2 1.363(7) . ?
 F14 B4 1.366(8) . ?
 F16 B4 1.364(8) . ?
 F13 B4 1.355(8) . ?
 F15 B4 1.417(9) . ?
 N1S2 C1S2 1.155(10) . ?
 N1S1 C1S1 1.130(7) . ?
 C1S2 C2S2 1.466(10) . ?
 C1S1 C2S1 1.513(10) . ?
 C2S1 H2SA 0.9800 . ?
 C2S1 H2SB 0.9800 . ?
 C2S1 H2SC 0.9800 . ?
 O1ET C2ET 1.242(10) . ?
 O1ET C3ET 1.490(12) . ?
 C1ET C2ET 1.390(13) . ?
 C3ET C4ET 1.595(15) . ?
 O1F C16F 1.405(13) . ?
 O1F C13F 1.377(11) . ?
 C19F C18F 1.385(12) . ?
 C19F C20F 1.378(12) . ?
 C17F H17F 0.9500 . ?
 C17F C18F 1.365(12) . ?
 C17F C16F 1.369(13) . ?
 C18F H18F 0.9500 . ?
 C16F C21F 1.382(12) . ?
 C20F H20F 0.9500 . ?
 C20F C21F 1.378(12) . ?
 C13F C14F 1.396(12) . ?
 C13F C12F 1.381(12) . ?
 C21F H21F 0.9500 . ?
 C10F C15F 1.372(12) . ?
 C10F C11F 1.386(12) . ?
 C15F H15F 0.9500 . ?
 C15F C14F 1.373(12) . ?
 C14F H14F 0.9500 . ?
 C11F H11F 0.9500 . ?
 C11F C12F 1.383(11) . ?
 C12F H12F 0.9500 . ?
 O1D C13D 1.412(10) . ?
 O1D C16D 1.378(10) . ?
 C10D C15D 1.333(10) . ?
 C10D C11D 1.328(11) . ?
 C15D H15D 0.9500 . ?
 C15D C14D 1.394(10) . ?
 C13D C14D 1.332(10) . ?
 C13D C12D 1.347(12) . ?
 C14D H14D 0.9500 . ?
 C12D H12D 0.9500 . ?
 C12D C11D 1.358(12) . ?
 C19D C20D 1.359(11) . ?
 C19D C18D 1.389(11) . ?
 C20D H20D 0.9500 . ?
 C20D C21D 1.385(10) . ?
 C21D H21D 0.9500 . ?
 C21D C16D 1.366(11) . ?
 C16D C17D 1.377(11) . ?
 C18D H18D 0.9500 . ?
 C18D C17D 1.387(11) . ?
 C17D H17D 0.9500 . ?
 C11D H11D 0.9500 . ?
 B3A F11A 1.4032 . ?
 B3A F9A 1.4028 . ?
 B3A F10A 1.4024 . ?
 B3A F12A 1.4025 . ?
 B1 F11B 1.4034 . ?
 B1 F9B 1.4023 . ?
 B1 F10B 1.4010 . ?
 B1 F12B 1.4030 . ?
 B1A F2A 1.4021 . ?
 B1A F1A 1.4019 . ?
 B1A F3A 1.4024 . ?
 B1A F4A 1.4021 . ?
 B1B F2B 1.4029 . ?
 B1B F1B 1.4020 . ?
 B1B F3B 1.4030 . ?
 B1B F4B 1.4013 . ?
 N1S4 C1S4 1.1631 . ?
 C1S4 C2S4 1.4537 . ?
 C2S4 H2SD 0.9800 . ?
 C2S4 H2SE 0.9800 . ?
 C2S4 H2SF 0.9800 . ?
 N1T4 C1T4 1.1615 . ?
 C1T4 C2T4 1.4544 . ?
 C2T4 H2TA 0.9800 . ?
 C2T4 H2TB 0.9800 . ?
 C2T4 H2TC 0.9800 . ?
 N1T2 C1T2 1.145(12) . ?
 C1T2 C2T2 1.456(13) . ?
 N1S3 C1S3 1.1629 . ?
 C1S3 C2S3 1.4530 . ?

loop_
  _geom_angle_atom_site_label_1
  _geom_angle_atom_site_label_2
  _geom_angle_atom_site_label_3
  _geom_angle
  _geom_angle_site_symmetry_1
  _geom_angle_site_symmetry_3
  _geom_angle_publ_flag
 N6B Ni2 N5B 78.83(15) . . ?
 N6B Ni2 N5C 166.10(17) . . ?
 N6B Ni2 N5A 90.49(17) . . ?
 N6A Ni2 N6B 99.13(15) . . ?
 N6A Ni2 N5B 174.44(14) . . ?
 N6A Ni2 N5C 91.67(15) . . ?
 N6A Ni2 N6C 93.89(15) . . ?
 N6A Ni2 N5A 78.14(16) . . ?
 N5B Ni2 N5C 91.17(15) . . ?
 N5B Ni2 N5A 96.64(17) . . ?
 N5C Ni2 N5A 100.32(16) . . ?
 N6C Ni2 N6B 91.53(16) . . ?
 N6C Ni2 N5B 91.35(15) . . ?
 N6C Ni2 N5C 78.97(16) . . ?
 N6C Ni2 N5A 171.99(16) . . ?
 N3B Ni1 N3A 94.17(15) . . ?
 N3B Ni1 N4B 79.26(16) . . ?
 N3B Ni1 N3C 93.23(16) . . ?
 N3B Ni1 N4C 95.15(17) . . ?
 N3B Ni1 N4A 173.41(17) . . ?
 N3A Ni1 N4B 94.10(15) . . ?
 N3A Ni1 N3C 94.38(15) . . ?
 N3A Ni1 N4C 169.24(16) . . ?
 N3A Ni1 N4A 79.37(17) . . ?
 N3C Ni1 N4B 169.06(18) . . ?
 N3C Ni1 N4C 79.76(15) . . ?
 N3C Ni1 N4A 88.57(17) . . ?
 N4C Ni1 N4B 92.90(15) . . ?
 N4C Ni1 N4A 91.40(18) . . ?
 N4A Ni1 N4B 99.79(17) . . ?
 C25A N7A C28A 127.1(4) . . ?
 C25A N7A C24A 108.1(4) . . ?
 C24A N7A C28A 124.6(4) . . ?
 C6A N2A C3A 125.6(4) . . ?
 C7A N2A C3A 127.2(4) . . ?
 C7A N2A C6A 107.2(4) . . ?
 C16B O1B C13B 115.8(4) . . ?
 C25B N6B Ni2 142.2(3) . . ?
 C25B N6B C23B 106.5(4) . . ?
 C23B N6B Ni2 111.3(3) . . ?
 C25A N6A Ni2 140.3(3) . . ?
 C25A N6A C23A 106.9(4) . . ?
 C23A N6A Ni2 112.4(3) . . ?
 C6B N2B C3B 126.6(4) . . ?
 C6B N2B C7B 108.3(4) . . ?
 C7B N2B C3B 125.1(4) . . ?
 C22B N5B Ni2 114.0(3) . . ?
 C22B N5B C19B 118.4(4) . . ?
 C19B N5B Ni2 127.5(3) . . ?
 C24B N7B C28B 126.1(4) . . ?
 C25B N7B C28B 127.1(4) . . ?
 C25B N7B C24B 106.7(4) . . ?
 C22C N5C Ni2 113.3(3) . . ?
 C22C N5C C19C 118.0(8) . . ?
 C22C N5C C19F 117.0(9) . . ?
 C19C N5C Ni2 128.6(8) . . ?
 C19F N5C Ni2 127.9(10) . . ?
 C8B N3B Ni1 113.3(3) . . ?
 C6B N3B Ni1 141.4(3) . . ?
 C6B N3B C8B 105.3(4) . . ?
 C6A N3A Ni1 141.5(3) . . ?
 C6A N3A C8A 106.1(4) . . ?
 C8A N3A Ni1 112.4(3) . . ?
 C1A N1A C5A 116.4(4) . . ?
 C23C N6C Ni2 112.4(3) . . ?
 C25C N6C Ni2 140.9(3) . . ?
 C25C N6C C23C 106.7(4) . . ?
 C9B N4B Ni1 112.8(3) . . ?
 C9B N4B C10B 117.1(4) . . ?
 C10B N4B Ni1 129.8(3) . . ?
 C25C N7C C28C 126.5(5) . . ?
 C24C N7C C25C 107.2(4) . . ?
 C24C N7C C28C 126.3(5) . . ?
 C19A N5A Ni2 135.7(4) . . ?
 C22A N5A Ni2 113.9(3) . . ?
 C22A N5A C19A 110.1(5) . . ?
 C22A N5A C19D 127.0(6) . . ?
 C19D N5A Ni2 118.9(5) . . ?
 C8C N3C Ni1 110.2(3) . . ?
 C6C N3C Ni1 141.9(4) . . ?
 C6C N3C C8C 107.7(4) . . ?
 C10C N4C Ni1 134.6(9) . . ?
 C9C N4C Ni1 113.6(3) . . ?
 C9C N4C C10C 111.7(9) . . ?
 C9C N4C C10F 123.9(11) . . ?
 C10F N4C Ni1 122.0(11) . . ?
 C9A N4A Ni1 113.6(3) . . ?
 C9A N4A C10A 123.0(5) . . ?
 C9A N4A C10D 102.5(6) . . ?
 C10A N4A Ni1 122.9(4) . . ?
 C10D N4A Ni1 143.9(6) . . ?
 C30A N8A C26A 116.5(5) . . ?
 C16A O1A C13A 117.0(5) . . ?
 C6C N2C C3C 123.4(5) . . ?
 C7C N2C C6C 107.9(4) . . ?
 C7C N2C C3C 128.4(5) . . ?
 C29A C28A N7A 120.7(4) . . ?
 C27A C28A N7A 121.0(4) . . ?
 C27A C28A C29A 118.3(4) . . ?
 N7A C25A H25A 124.9 . . ?
 N6A C25A N7A 110.3(4) . . ?
 N6A C25A H25A 124.9 . . ?
 C3A C2A H2A 120.9 . . ?
 C3A C2A C1A 118.2(4) . . ?
 C1A C2A H2A 120.9 . . ?
 N3B C8B C9B 116.9(5) . . ?
 C7B C8B N3B 111.4(4) . . ?
 C7B C8B C9B 131.7(4) . . ?
 C5B N1B C1B 116.6(5) . . ?
 C2A C3A N2A 120.7(4) . . ?
 C2A C3A C4A 118.7(4) . . ?
 C4A C3A N2A 120.6(4) . . ?
 N2B C6B H6B 124.7 . . ?
 N3B C6B N2B 110.7(4) . . ?
 N3B C6B H6B 124.7 . . ?
 N5B C22B H22B 121.0 . . ?
 N5B C22B C23B 117.9(4) . . ?
 C23B C22B H22B 121.0 . . ?
 N2A C6A H6A 124.9 . . ?
 N3A C6A N2A 110.1(4) . . ?
 N3A C6A H6A 124.9 . . ?
 C26B N8B C30B 116.7(5) . . ?
 C13C O1C C16C 116.7(9) . . ?
 N1A C1A C2A 124.5(5) . . ?
 N1A C1A H1A 117.8 . . ?
 C2A C1A H1A 117.8 . . ?
 C27B C28B N7B 121.2(4) . . ?
 C27B C28B C29B 119.4(5) . . ?
 C29B C28B N7B 119.4(5) . . ?
 N7B C24B H24B 126.7 . . ?
 C23B C24B N7B 106.6(4) . . ?
 C23B C24B H24B 126.7 . . ?
 C2B C3B N2B 120.3(4) . . ?
 C4B C3B N2B 120.5(4) . . ?
 C4B C3B C2B 119.2(5) . . ?
 N2A C7A H7A 127.0 . . ?
 C8A C7A N2A 106.0(4) . . ?
 C8A C7A H7A 127.0 . . ?
 N5C C22C H22C 120.7 . . ?
 N5C C22C C23C 118.6(4) . . ?
 C23C C22C H22C 120.7 . . ?
 N7A C24A H24A 127.6 . . ?
 C23A C24A N7A 104.9(4) . . ?
 C23A C24A H24A 127.6 . . ?
 N3A C8A C9A 117.3(5) . . ?
 C7A C8A N3A 110.5(4) . . ?
 C7A C8A C9A 132.2(5) . . ?
 N6B C25B N7B 111.3(4) . . ?
 N6B C25B H25B 124.4 . . ?
 N7B C25B H25B 124.4 . . ?
 N6B C23B C22B 117.6(4) . . ?
 C24B C23B N6B 108.9(4) . . ?
 C24B C23B C22B 133.4(4) . . ?
 N4A C9A C8A 116.9(5) . . ?
 N6A C23A C22A 118.2(5) . . ?
 C24A C23A N6A 109.8(4) . . ?
 C24A C23A C22A 131.8(5) . . ?
 N4B C9B C8B 117.7(4) . . ?
 N4B C9B H9B 121.2 . . ?
 C8B C9B H9B 121.2 . . ?
 C18C C19C N5C 122.5(10) . . ?
 C18C C19C C20C 115.2(9) . . ?
 C20C C19C N5C 121.8(10) . . ?
 C15B C10B N4B 118.5(4) . . ?
 C15B C10B C11B 120.4(5) . . ?
 C11B C10B N4B 121.1(5) . . ?
 C3A C4A H4A 121.2 . . ?
 C5A C4A C3A 117.6(5) . . ?
 C5A C4A H4A 121.2 . . ?
 N6C C23C C22C 116.3(4) . . ?
 C24C C23C N6C 109.2(5) . . ?
 C24C C23C C22C 134.4(5) . . ?
 C28A C29A H29A 121.0 . . ?
 C30A C29A C28A 117.9(5) . . ?
 C30A C29A H29A 121.0 . . ?
 C15C C10C N4C 121.0(9) . . ?
 C11C C10C N4C 120.7(8) . . ?
 C11C C10C C15C 117.9(8) . . ?
 N2B C7B H7B 127.8 . . ?
 C8B C7B N2B 104.3(4) . . ?
 C8B C7B H7B 127.8 . . ?
 C10C C15C H15C 120.0 . . ?
 C14C C15C C10C 120.1(10) . . ?
 C14C C15C H15C 120.0 . . ?
 N1A C5A C4A 124.6(5) . . ?
 N1A C5A H5A 117.7 . . ?
 C4A C5A H5A 117.7 . . ?
 C28A C27A H27A 120.6 . . ?
 C28A C27A C26A 118.8(5) . . ?
 C26A C27A H27A 120.6 . . ?
 C30C N8C C26C 115.8(6) . . ?
 N6C C25C N7C 110.2(5) . . ?
 N6C C25C H25C 124.9 . . ?
 N7C C25C H25C 124.9 . . ?
 C20A C19A N5A 113.6(6) . . ?
 C20A C19A C18A 120.4(7) . . ?
 C18A C19A N5A 126.0(6) . . ?
 C21B C16B O1B 116.5(4) . . ?
 C21B C16B C17B 120.5(4) . . ?
 C17B C16B O1B 123.0(4) . . ?
 N8A C30A C29A 125.0(5) . . ?
 N8A C30A H30A 117.5 . . ?
 C29A C30A H30A 117.5 . . ?
 C10B C15B H15B 120.6 . . ?
 C10B C15B C14B 118.9(5) . . ?
 C14B C15B H15B 120.6 . . ?
 C20B C19B N5B 120.2(4) . . ?
 C20B C19B C18B 119.5(4) . . ?
 C18B C19B N5B 120.2(4) . . ?
 N5A C22A C23A 117.4(5) . . ?
 N5A C22A H22A 121.3 . . ?
 C23A C22A H22A 121.3 . . ?
 C10B C11B H11B 120.1 . . ?
 C12B C11B C10B 119.8(6) . . ?
 C12B C11B H11B 120.1 . . ?
 C15C C14C H14C 119.2 . . ?
 C13C C14C C15C 121.6(10) . . ?
 C13C C14C H14C 119.2 . . ?
 N3C C8C C9C 118.5(4) . . ?
 C7C C8C N3C 108.4(4) . . ?
 C7C C8C C9C 133.0(5) . . ?
 N7C C24C H24C 126.7 . . ?
 C23C C24C N7C 106.7(5) . . ?
 C23C C24C H24C 126.7 . . ?
 C29C C28C N7C 120.7(5) . . ?
 C27C C28C N7C 120.5(5) . . ?
 C27C C28C C29C 118.8(5) . . ?
 C18C C17C H17C 121.0 . . ?
 C16C C17C H17C 121.0 . . ?
 C16C C17C C18C 117.9(10) . . ?
 C3B C2B H2B 120.9 . . ?
 C1B C2B C3B 118.2(5) . . ?
 C1B C2B H2B 120.9 . . ?
 C13B C12B C11B 120.3(5) . . ?
 C12B C13B O1B 121.2(5) . . ?
 C12B C13B C14B 121.3(5) . . ?
 C14B C13B O1B 117.4(6) . . ?
 N3C C6C N2C 108.8(4) . . ?
 N3C C6C H6C 125.6 . . ?
 N2C C6C H6C 125.6 . . ?
 C15B C14B H14B 120.4 . . ?
 C13B C14B C15B 119.2(6) . . ?
 C13B C14B H14B 120.4 . . ?
 C19A C20A H20A 119.6 . . ?
 C19A C20A C21A 120.8(8) . . ?
 C21A C20A H20A 119.6 . . ?
 C28B C27B H27B 121.2 . . ?
 C26B C27B C28B 117.7(6) . . ?
 C26B C27B H27B 121.2 . . ?
 C28B C29B H29B 121.1 . . ?
 C30B C29B C28B 117.8(6) . . ?
 C30B C29B H29B 121.1 . . ?
 N1B C1B C2B 124.0(5) . . ?
 N1B C1B H1B 118.0 . . ?
 C2B C1B H1B 118.0 . . ?
 C15A C10A N4A 120.1(5) . . ?
 C15A C10A C11A 121.2(6) . . ?
 C11A C10A N4A 118.6(6) . . ?
 C10A C15A H15A 120.2 . . ?
 C14A C15A C10A 119.6(7) . . ?
 C14A C15A H15A 120.2 . . ?
 N4C C9C C8C 117.8(5) . . ?
 N4C C9C H9C 121.1 . . ?
 C8C C9C H9C 121.1 . . ?
 C19B C20B H20B 119.9 . . ?
 C19B C20B C21B 120.2(5) . . ?
 C21B C20B H20B 119.9 . . ?
 N8A C26A C27A 123.4(5) . . ?
 N8A C26A H26A 118.3 . . ?
 C27A C26A H26A 118.3 . . ?
 C16B C21B C20B 119.9(5) . . ?
 C16B C21B H21B 120.0 . . ?
 C20B C21B H21B 120.0 . . ?
 C19C C18C H18C 118.1 . . ?
 C17C C18C C19C 123.9(10) . . ?
 C17C C18C H18C 118.1 . . ?
 C3B C4B H4B 121.1 . . ?
 C3B C4B C5B 117.8(5) . . ?
 C5B C4B H4B 121.1 . . ?
 C20A C21A H21A 120.6 . . ?
 C16A C21A C20A 118.7(8) . . ?
 C16A C21A H21A 120.6 . . ?
 C28C C29C H29C 121.4 . . ?
 C28C C29C C30C 117.2(6) . . ?
 C30C C29C H29C 121.4 . . ?
 C21A C16A O1A 119.5(6) . . ?
 C21A C16A C17A 120.2(6) . . ?
 C17A C16A O1A 120.2(6) . . ?
 C16B C17B H17B 120.4 . . ?
 C18B C17B C16B 119.2(5) . . ?
 C18B C17B H17B 120.4 . . ?
 C17C C16C O1C 118.5(10) . . ?
 C17C C16C C21C 121.5(9) . . ?
 C21C C16C O1C 119.9(9) . . ?
 N8B C30B H30B 118.6 . . ?
 C29B C30B N8B 122.7(6) . . ?
 C29B C30B H30B 118.6 . . ?
 N1B C5B C4B 124.0(6) . . ?
 N1B C5B H5B 118.0 . . ?
 C4B C5B H5B 118.0 . . ?
 O1A C13A C12A 121.8(6) . . ?
 C14A C13A O1A 115.6(6) . . ?
 C14A C13A C12A 122.3(6) . . ?
 C19C C20C H20C 118.6 . . ?
 C21C C20C C19C 122.9(9) . . ?
 C21C C20C H20C 118.6 . . ?
 C15A C14A C13A 118.3(7) . . ?
 C15A C14A H14A 120.8 . . ?
 C13A C14A H14A 120.8 . . ?
 C19A C18A H18A 120.7 . . ?
 C19A C18A C17A 118.6(7) . . ?
 C17A C18A H18A 120.7 . . ?
 N8B C26B C27B 125.7(6) . . ?
 N8B C26B H26B 117.2 . . ?
 C27B C26B H26B 117.2 . . ?
 C19B C18B C17B 120.4(5) . . ?
 C19B C18B H18B 119.8 . . ?
 C17B C18B H18B 119.8 . . ?
 N2C C7C C8C 107.1(5) . . ?
 N2C C7C H7C 126.4 . . ?
 C8C C7C H7C 126.4 . . ?
 O1C C13C C14C 121.1(8) . . ?
 C12C C13C O1C 120.7(8) . . ?
 C12C C13C C14C 118.2(8) . . ?
 N8C C30C C29C 125.5(7) . . ?
 N8C C30C H30C 117.2 . . ?
 C29C C30C H30C 117.2 . . ?
 C3C C2C H2C 121.0 . . ?
 C3C C2C C1C 117.9(7) . . ?
 C1C C2C H2C 121.0 . . ?
 C16C C21C C20C 118.6(10) . . ?
 C16C C21C H21C 120.7 . . ?
 C20C C21C H21C 120.7 . . ?
 C16A C17A C18A 121.1(7) . . ?
 C16A C17A H17A 119.4 . . ?
 C18A C17A H17A 119.4 . . ?
 C28C C27C H27C 121.2 . . ?
 C28C C27C C26C 117.5(7) . . ?
 C26C C27C H27C 121.2 . . ?
 N8C C26C C27C 125.1(7) . . ?
 N8C C26C H26C 117.4 . . ?
 C27C C26C H26C 117.4 . . ?
 C2C C3C N2C 119.4(6) . . ?
 C2C C3C C4C 123.4(7) . . ?
 C4C C3C N2C 117.1(6) . . ?
 C10C C11C H11C 119.5 . . ?
 C10C C11C C12C 121.0(8) . . ?
 C12C C11C H11C 119.5 . . ?
 C2C C1C H1C 120.2 . . ?
 N1C C1C C2C 119.6(9) . . ?
 N1C C1C H1C 120.2 . . ?
 C10A C11A H11A 120.0 . . ?
 C12A C11A C10A 120.0(7) . . ?
 C12A C11A H11A 120.0 . . ?
 C13A C12A H12A 121.1 . . ?
 C11A C12A C13A 117.8(7) . . ?
 C11A C12A H12A 121.1 . . ?
 C1C N1C C5C 122.6(11) . . ?
 C13C C12C C11C 120.9(8) . . ?
 C13C C12C H12C 119.6 . . ?
 C11C C12C H12C 119.6 . . ?
 C3C C4C H4C 122.7 . . ?
 C3C C4C C5C 114.5(9) . . ?
 C5C C4C H4C 122.7 . . ?
 N1C C5C C4C 121.7(11) . . ?
 N1C C5C H5C 119.1 . . ?
 C4C C5C H5C 119.1 . . ?
 F7 B2 F6 110.5(5) . . ?
 F5 B2 F7 110.2(5) . . ?
 F5 B2 F6 109.1(5) . . ?
 F8 B2 F7 112.0(5) . . ?
 F8 B2 F5 111.5(5) . . ?
 F8 B2 F6 103.3(6) . . ?
 F14 B4 F15 107.1(7) . . ?
 F16 B4 F14 114.1(6) . . ?
 F16 B4 F15 102.1(6) . . ?
 F13 B4 F14 108.8(5) . . ?
 F13 B4 F16 113.3(7) . . ?
 F13 B4 F15 111.1(7) . . ?
 N1S2 C1S2 C2S2 174.5(11) . . ?
 N1S1 C1S1 C2S1 178.7(10) . . ?
 C1S1 C2S1 H2SA 109.5 . . ?
 C1S1 C2S1 H2SB 109.5 . . ?
 C1S1 C2S1 H2SC 109.5 . . ?
 H2SA C2S1 H2SB 109.5 . . ?
 H2SA C2S1 H2SC 109.5 . . ?
 H2SB C2S1 H2SC 109.5 . . ?
 C2ET O1ET C3ET 137.8(11) . . ?
 O1ET C2ET C1ET 129.1(12) . . ?
 O1ET C3ET C4ET 102.3(11) . . ?
 C13F O1F C16F 115.2(11) . . ?
 C18F C19F N5C 121.6(13) . . ?
 C20F C19F N5C 116.0(11) . . ?
 C20F C19F C18F 122.3(11) . . ?
 C18F C17F H17F 120.8 . . ?
 C18F C17F C16F 118.3(13) . . ?
 C16F C17F H17F 120.8 . . ?
 C19F C18F H18F 120.6 . . ?
 C17F C18F C19F 118.8(14) . . ?
 C17F C18F H18F 120.6 . . ?
 C17F C16F O1F 118.7(13) . . ?
 C17F C16F C21F 123.7(12) . . ?
 C21F C16F O1F 117.1(14) . . ?
 C19F C20F H20F 120.5 . . ?
 C21F C20F C19F 119.1(12) . . ?
 C21F C20F H20F 120.5 . . ?
 O1F C13F C14F 112.6(11) . . ?
 O1F C13F C12F 125.4(10) . . ?
 C12F C13F C14F 121.9(10) . . ?
 C16F C21F H21F 121.4 . . ?
 C20F C21F C16F 117.3(13) . . ?
 C20F C21F H21F 121.4 . . ?
 C15F C10F N4C 115.4(12) . . ?
 C15F C10F C11F 123.8(11) . . ?
 C11F C10F N4C 120.6(12) . . ?
 C10F C15F H15F 119.9 . . ?
 C10F C15F C14F 120.2(14) . . ?
 C14F C15F H15F 119.9 . . ?
 C13F C14F H14F 121.4 . . ?
 C15F C14F C13F 117.1(14) . . ?
 C15F C14F H14F 121.4 . . ?
 C10F C11F H11F 122.1 . . ?
 C12F C11F C10F 115.7(11) . . ?
 C12F C11F H11F 122.1 . . ?
 C13F C12F C11F 121.2(11) . . ?
 C13F C12F H12F 119.4 . . ?
 C11F C12F H12F 119.4 . . ?
 C16D O1D C13D 118.1(7) . . ?
 C15D C10D N4A 118.2(8) . . ?
 C11D C10D N4A 125.3(9) . . ?
 C11D C10D C15D 115.5(10) . . ?
 C10D C15D H15D 118.5 . . ?
 C10D C15D C14D 123.1(9) . . ?
 C14D C15D H15D 118.5 . . ?
 C14D C13D O1D 117.0(8) . . ?
 C14D C13D C12D 117.5(9) . . ?
 C12D C13D O1D 125.3(9) . . ?
 C15D C14D H14D 120.3 . . ?
 C13D C14D C15D 119.5(8) . . ?
 C13D C14D H14D 120.3 . . ?
 C13D C12D H12D 119.4 . . ?
 C13D C12D C11D 121.2(13) . . ?
 C11D C12D H12D 119.4 . . ?
 C20D C19D N5A 126.4(8) . . ?
 C20D C19D C18D 120.6(9) . . ?
 C18D C19D N5A 112.9(8) . . ?
 C19D C20D H20D 120.4 . . ?
 C19D C20D C21D 119.3(10) . . ?
 C21D C20D H20D 120.4 . . ?
 C20D C21D H21D 119.6 . . ?
 C16D C21D C20D 120.9(10) . . ?
 C16D C21D H21D 119.6 . . ?
 C21D C16D O1D 120.7(8) . . ?
 C21D C16D C17D 120.1(9) . . ?
 C17D C16D O1D 119.2(8) . . ?
 C19D C18D H18D 120.2 . . ?
 C17D C18D C19D 119.7(11) . . ?
 C17D C18D H18D 120.2 . . ?
 C16D C17D C18D 119.3(10) . . ?
 C16D C17D H17D 120.3 . . ?
 C18D C17D H17D 120.3 . . ?
 C10D C11D C12D 122.8(12) . . ?
 C10D C11D H11D 118.6 . . ?
 C12D C11D H11D 118.6 . . ?
 F9A B3A F11A 109.4 . . ?
 F10A B3A F11A 109.4 . . ?
 F10A B3A F9A 109.5 . . ?
 F10A B3A F12A 109.5 . . ?
 F12A B3A F11A 109.5 . . ?
 F12A B3A F9A 109.5 . . ?
 F9B B1 F11B 109.5 . . ?
 F9B B1 F12B 109.5 . . ?
 F10B B1 F11B 109.4 . . ?
 F10B B1 F9B 109.5 . . ?
 F10B B1 F12B 109.4 . . ?
 F12B B1 F11B 109.5 . . ?
 F2A B1A F3A 109.4 . . ?
 F2A B1A F4A 109.5 . . ?
 F1A B1A F2A 109.4 . . ?
 F1A B1A F3A 109.5 . . ?
 F1A B1A F4A 109.5 . . ?
 F4A B1A F3A 109.5 . . ?
 F2B B1B F3B 109.4 . . ?
 F1B B1B F2B 109.5 . . ?
 F1B B1B F3B 109.4 . . ?
 F4B B1B F2B 109.5 . . ?
 F4B B1B F1B 109.5 . . ?
 F4B B1B F3B 109.4 . . ?
 N1S4 C1S4 C2S4 179.98(6) . . ?
 C1S4 C2S4 H2SD 109.5 . . ?
 C1S4 C2S4 H2SE 109.5 . . ?
 C1S4 C2S4 H2SF 109.5 . . ?
 H2SD C2S4 H2SE 109.5 . . ?
 H2SD C2S4 H2SF 109.5 . . ?
 H2SE C2S4 H2SF 109.5 . . ?
 N1T4 C1T4 C2T4 179.94(9) . . ?
 C1T4 C2T4 H2TA 109.5 . . ?
 C1T4 C2T4 H2TB 109.5 . . ?
 C1T4 C2T4 H2TC 109.5 . . ?
 H2TA C2T4 H2TB 109.5 . . ?
 H2TA C2T4 H2TC 109.5 . . ?
 H2TB C2T4 H2TC 109.5 . . ?
 N1T2 C1T2 C2T2 175(2) . . ?
 N1S3 C1S3 C2S3 179.94(7) . . ?

loop_
  _geom_torsion_atom_site_label_1
  _geom_torsion_atom_site_label_2
  _geom_torsion_atom_site_label_3
  _geom_torsion_atom_site_label_4
  _geom_torsion
  _geom_torsion_site_symmetry_1
  _geom_torsion_site_symmetry_2
  _geom_torsion_site_symmetry_3
  _geom_torsion_site_symmetry_4
  _geom_torsion_publ_flag
 Ni2 N6B C25B N7B 177.0(4) . . . . ?
 Ni2 N6B C23B C22B 3.9(5) . . . . ?
 Ni2 N6B C23B C24B -178.8(3) . . . . ?
 Ni2 N6A C25A N7A -171.8(3) . . . . ?
 Ni2 N6A C23A C24A 174.1(3) . . . . ?
 Ni2 N6A C23A C22A -1.6(5) . . . . ?
 Ni2 N5B C22B C23B -4.1(5) . . . . ?
 Ni2 N5B C19B C20B -94.3(5) . . . . ?
 Ni2 N5B C19B C18B 82.2(6) . . . . ?
 Ni2 N5C C22C C23C 5.9(5) . . . . ?
 Ni2 N5C C19C C18C 114.6(11) . . . . ?
 Ni2 N5C C19C C20C -56(2) . . . . ?
 Ni2 N5C C19F C18F 128.3(11) . . . . ?
 Ni2 N5C C19F C20F -57(2) . . . . ?
 Ni2 N6C C23C C22C -2.9(5) . . . . ?
 Ni2 N6C C23C C24C 179.3(3) . . . . ?
 Ni2 N6C C25C N7C -179.1(4) . . . . ?
 Ni2 N5A C19A C20A -61.3(8) . . . . ?
 Ni2 N5A C19A C18A 116.3(8) . . . . ?
 Ni2 N5A C22A C23A -0.4(6) . . . . ?
 Ni2 N5A C19D C20D -65.3(10) . . . . ?
 Ni2 N5A C19D C18D 118.5(9) . . . . ?
 Ni1 N3B C8B C9B -1.6(5) . . . . ?
 Ni1 N3B C8B C7B 180.0(3) . . . . ?
 Ni1 N3B C6B N2B -179.4(4) . . . . ?
 Ni1 N3A C6A N2A 177.5(3) . . . . ?
 Ni1 N3A C8A C7A -177.4(3) . . . . ?
 Ni1 N3A C8A C9A 2.7(5) . . . . ?
 Ni1 N4B C9B C8B 3.4(5) . . . . ?
 Ni1 N4B C10B C15B -54.6(6) . . . . ?
 Ni1 N4B C10B C11B 123.7(4) . . . . ?
 Ni1 N3C C8C C9C -4.0(7) . . . . ?
 Ni1 N3C C8C C7C 172.8(5) . . . . ?
 Ni1 N3C C6C N2C -172.0(5) . . . . ?
 Ni1 N4C C10C C15C -56.4(17) . . . . ?
 Ni1 N4C C10C C11C 117.1(14) . . . . ?
 Ni1 N4C C9C C8C 1.2(7) . . . . ?
 Ni1 N4C C10F C15F -92.2(15) . . . . ?
 Ni1 N4C C10F C11F 93.1(19) . . . . ?
 Ni1 N4A C9A C8A -6.6(5) . . . . ?
 Ni1 N4A C10A C15A -85.1(7) . . . . ?
 Ni1 N4A C10A C11A 94.6(7) . . . . ?
 Ni1 N4A C10D C15D -76.7(11) . . . . ?
 Ni1 N4A C10D C11D 91.1(13) . . . . ?
 N7A C28A C29A C30A 179.3(4) . . . . ?
 N7A C28A C27A C26A 179.3(4) . . . . ?
 N7A C24A C23A N6A 0.2(5) . . . . ?
 N7A C24A C23A C22A 175.1(5) . . . . ?
 N2A C3A C4A C5A -179.4(4) . . . . ?
 N2A C7A C8A N3A -1.4(5) . . . . ?
 N2A C7A C8A C9A 178.4(4) . . . . ?
 O1B C16B C21B C20B 176.1(6) . . . . ?
 O1B C16B C17B C18B -177.0(7) . . . . ?
 O1B C13B C14B C15B -179.8(4) . . . . ?
 N6A C23A C22A N5A 1.4(7) . . . . ?
 N2B C3B C2B C1B -178.8(5) . . . . ?
 N2B C3B C4B C5B 180.0(5) . . . . ?
 N5B C22B C23B N6B 0.1(6) . . . . ?
 N5B C22B C23B C24B -176.3(5) . . . . ?
 N5B C19B C20B C21B -178.9(5) . . . . ?
 N5B C19B C18B C17B 177.9(6) . . . . ?
 N7B C28B C27B C26B 179.7(4) . . . . ?
 N7B C28B C29B C30B -178.6(5) . . . . ?
 N7B C24B C23B N6B 1.3(5) . . . . ?
 N7B C24B C23B C22B 178.0(5) . . . . ?
 N5C C22C C23C N6C -2.1(7) . . . . ?
 N5C C22C C23C C24C 175.0(6) . . . . ?
 N5C C19C C18C C17C -170.0(18) . . . . ?
 N5C C19C C20C C21C 169.6(15) . . . . ?
 N5C C19F C18F C17F 177(2) . . . . ?
 N5C C19F C20F C21F -177.0(15) . . . . ?
 N3B C8B C9B N4B -1.3(7) . . . . ?
 N3B C8B C7B N2B -0.7(5) . . . . ?
 N3A C8A C9A N4A 2.7(6) . . . . ?
 N6C C23C C24C N7C 0.3(6) . . . . ?
 N4B C10B C15B C14B 178.0(4) . . . . ?
 N4B C10B C11B C12B -177.3(4) . . . . ?
 N7C C28C C29C C30C -179.3(6) . . . . ?
 N7C C28C C27C C26C 177.8(6) . . . . ?
 N5A C19A C20A C21A 175.6(7) . . . . ?
 N5A C19A C18A C17A -172.3(7) . . . . ?
 N5A C19D C20D C21D -176.2(9) . . . . ?
 N5A C19D C18D C17D 173.4(11) . . . . ?
 N3C C8C C9C N4C 2.0(9) . . . . ?
 N3C C8C C7C N2C 3.3(8) . . . . ?
 N4C C10C C15C C14C 176.2(17) . . . . ?
 N4C C10C C11C C12C -176.8(13) . . . . ?
 N4C C10F C15F C14F -174(2) . . . . ?
 N4C C10F C11F C12F 174.7(19) . . . . ?
 N4A C10A C15A C14A -176.4(7) . . . . ?
 N4A C10A C11A C12A 174.3(7) . . . . ?
 N4A C10D C15D C14D 162.8(10) . . . . ?
 N4A C10D C11D C12D -161.2(14) . . . . ?
 O1A C16A C17A C18A -177.6(7) . . . . ?
 O1A C13A C14A C15A 177.1(7) . . . . ?
 O1A C13A C12A C11A -179.6(8) . . . . ?
 N2C C3C C4C C5C -175.9(8) . . . . ?
 C28A N7A C25A N6A 175.4(4) . . . . ?
 C28A N7A C24A C23A -175.2(4) . . . . ?
 C28A C29A C30A N8A 0.8(8) . . . . ?
 C28A C27A C26A N8A 2.3(8) . . . . ?
 C25A N7A C28A C29A -5.0(6) . . . . ?
 C25A N7A C28A C27A 173.4(4) . . . . ?
 C25A N7A C24A C23A -0.8(5) . . . . ?
 C25A N6A C23A C24A 0.5(5) . . . . ?
 C25A N6A C23A C22A -175.2(4) . . . . ?
 C2A C3A C4A C5A 0.7(6) . . . . ?
 C8B N3B C6B N2B -0.7(5) . . . . ?
 C3A N2A C6A N3A 178.7(3) . . . . ?
 C3A N2A C7A C8A -177.7(4) . . . . ?
 C3A C2A C1A N1A 2.9(6) . . . . ?
 C3A C4A C5A N1A 0.6(7) . . . . ?
 C6B N2B C3B C2B 9.7(7) . . . . ?
 C6B N2B C3B C4B -169.7(5) . . . . ?
 C6B N2B C7B C8B 0.2(5) . . . . ?
 C6B N3B C8B C9B 179.3(4) . . . . ?
 C6B N3B C8B C7B 0.9(5) . . . . ?
 C22B N5B C19B C20B 82.8(6) . . . . ?
 C22B N5B C19B C18B -100.7(6) . . . . ?
 C6A N2A C3A C2A -2.0(6) . . . . ?
 C6A N2A C3A C4A 178.1(4) . . . . ?
 C6A N2A C7A C8A 0.7(4) . . . . ?
 C6A N3A C8A C7A 1.6(5) . . . . ?
 C6A N3A C8A C9A -178.3(4) . . . . ?
 O1C C16C C21C C20C 177.7(14) . . . . ?
 O1C C13C C12C C11C -177.8(10) . . . . ?
 C1A N1A C5A C4A -0.2(7) . . . . ?
 C1A C2A C3A N2A 177.8(3) . . . . ?
 C1A C2A C3A C4A -2.3(6) . . . . ?
 C28B N7B C24B C23B -177.3(4) . . . . ?
 C28B N7B C25B N6B 176.8(4) . . . . ?
 C28B C27B C26B N8B -1.0(9) . . . . ?
 C28B C29B C30B N8B -1.3(9) . . . . ?
 C24B N7B C28B C27B 10.5(7) . . . . ?
 C24B N7B C28B C29B -169.3(5) . . . . ?
 C24B N7B C25B N6B 0.7(5) . . . . ?
 C3B N2B C6B N3B -179.9(4) . . . . ?
 C3B N2B C7B C8B -179.5(4) . . . . ?
 C3B C2B C1B N1B 0.1(9) . . . . ?
 C3B C4B C5B N1B -2.7(10) . . . . ?
 C7A N2A C3A C2A 176.2(4) . . . . ?
 C7A N2A C3A C4A -3.7(6) . . . . ?
 C7A N2A C6A N3A 0.2(5) . . . . ?
 C7A C8A C9A N4A -177.1(5) . . . . ?
 C22C N5C C19C C18C -64.5(17) . . . . ?
 C22C N5C C19C C20C 124.6(15) . . . . ?
 C22C N5C C19F C18F -36(2) . . . . ?
 C22C N5C C19F C20F 139.4(15) . . . . ?
 C22C C23C C24C N7C -177.0(5) . . . . ?
 C24A N7A C28A C29A 168.3(4) . . . . ?
 C24A N7A C28A C27A -13.3(6) . . . . ?
 C24A N7A C25A N6A 1.2(5) . . . . ?
 C24A C23A C22A N5A -173.2(5) . . . . ?
 C8A N3A C6A N2A -1.1(5) . . . . ?
 C25B N6B C23B C22B -178.1(4) . . . . ?
 C25B N6B C23B C24B -0.8(5) . . . . ?
 C25B N7B C28B C27B -164.8(5) . . . . ?
 C25B N7B C28B C29B 15.4(7) . . . . ?
 C25B N7B C24B C23B -1.2(5) . . . . ?
 C23B N6B C25B N7B 0.1(5) . . . . ?
 C9A N4A C10A C15A 86.1(8) . . . . ?
 C9A N4A C10A C11A -94.1(8) . . . . ?
 C9A N4A C10D C15D 101.1(9) . . . . ?
 C9A N4A C10D C11D -91.1(12) . . . . ?
 C23A N6A C25A N7A -1.1(5) . . . . ?
 C9B N4B C10B C15B 132.2(5) . . . . ?
 C9B N4B C10B C11B -49.5(6) . . . . ?
 C9B C8B C7B N2B -178.8(5) . . . . ?
 C19C N5C C22C C23C -174.9(9) . . . . ?
 C19C C20C C21C C16C 1(2) . . . . ?
 C10B N4B C9B C8B 177.7(4) . . . . ?
 C10B C15B C14B C13B 0.0(7) . . . . ?
 C10B C11B C12B C13B -1.4(8) . . . . ?
 C23C N6C C25C N7C 1.3(5) . . . . ?
 C29A C28A C27A C26A -2.3(7) . . . . ?
 C10C N4C C9C C8C -178.6(7) . . . . ?
 C10C C15C C14C C13C 2.1(14) . . . . ?
 C10C C11C C12C C13C -1.0(19) . . . . ?
 C7B N2B C6B N3B 0.4(5) . . . . ?
 C7B N2B C3B C2B -170.7(5) . . . . ?
 C7B N2B C3B C4B 9.9(7) . . . . ?
 C7B C8B C9B N4B 176.7(5) . . . . ?
 C15C C10C C11C C12C -3(2) . . . . ?
 C15C C14C C13C O1C 177.2(11) . . . . ?
 C15C C14C C13C C12C -6.2(18) . . . . ?
 C5A N1A C1A C2A -1.6(6) . . . . ?
 C27A C28A C29A C30A 0.8(7) . . . . ?
 C25C N6C C23C C22C 176.8(4) . . . . ?
 C25C N6C C23C C24C -1.0(6) . . . . ?
 C25C N7C C24C C23C 0.5(6) . . . . ?
 C25C N7C C28C C29C 22.0(7) . . . . ?
 C25C N7C C28C C27C -158.5(6) . . . . ?
 C19A N5A C22A C23A 174.0(5) . . . . ?
 C19A C20A C21A C16A -2.4(10) . . . . ?
 C19A C18A C17A C16A -3.7(12) . . . . ?
 C16B O1B C13B C12B -68.0(7) . . . . ?
 C16B O1B C13B C14B 111.5(6) . . . . ?
 C16B C17B C18B C19B 2.1(11) . . . . ?
 C30A N8A C26A C27A -0.7(8) . . . . ?
 C15B C10B C11B C12B 1.1(7) . . . . ?
 C19B N5B C22B C23B 178.5(4) . . . . ?
 C19B C20B C21B C16B -0.1(9) . . . . ?
 C22A N5A C19A C20A 126.0(6) . . . . ?
 C22A N5A C19A C18A -56.4(9) . . . . ?
 C22A N5A C19D C20D 110.2(10) . . . . ?
 C22A N5A C19D C18D -66.0(11) . . . . ?
 C11B C10B C15B C14B -0.4(7) . . . . ?
 C11B C12B C13B O1B -179.5(4) . . . . ?
 C11B C12B C13B C14B 1.0(8) . . . . ?
 C14C C13C C12C C11C 5.6(17) . . . . ?
 C8C N3C C6C N2C 2.3(6) . . . . ?
 C24C N7C C25C N6C -1.1(6) . . . . ?
 C24C N7C C28C C29C -156.3(5) . . . . ?
 C24C N7C C28C C27C 23.1(8) . . . . ?
 C28C N7C C25C N6C -179.8(4) . . . . ?
 C28C N7C C24C C23C 179.1(4) . . . . ?
 C28C C29C C30C N8C 0.4(11) . . . . ?
 C28C C27C C26C N8C 3.1(13) . . . . ?
 C17C C16C C21C C20C 1(2) . . . . ?
 C2B C3B C4B C5B 0.5(8) . . . . ?
 C12B C13B C14B C15B -0.3(8) . . . . ?
 C13B O1B C16B C21B 162.8(6) . . . . ?
 C13B O1B C16B C17B -17.7(9) . . . . ?
 C6C N3C C8C C9C 179.7(5) . . . . ?
 C6C N3C C8C C7C -3.5(7) . . . . ?
 C6C N2C C7C C8C -1.9(8) . . . . ?
 C6C N2C C3C C2C 45.1(9) . . . . ?
 C6C N2C C3C C4C -137.7(7) . . . . ?
 C20A C19A C18A C17A 5.1(11) . . . . ?
 C20A C21A C16A O1A -179.4(7) . . . . ?
 C20A C21A C16A C17A 3.9(11) . . . . ?
 C27B C28B C29B C30B 1.6(8) . . . . ?
 C29B C28B C27B C26B -0.6(7) . . . . ?
 C1B N1B C5B C4B 3.3(10) . . . . ?
 C10A N4A C9A C8A -178.5(5) . . . . ?
 C10A C15A C14A C13A 3.5(11) . . . . ?
 C10A C11A C12A C13A 0.7(12) . . . . ?
 C15A C10A C11A C12A -6.0(12) . . . . ?
 C9C N4C C10C C15C 123.4(12) . . . . ?
 C9C N4C C10C C11C -63.1(18) . . . . ?
 C9C N4C C10F C15F 95.6(13) . . . . ?
 C9C N4C C10F C11F -79(2) . . . . ?
 C9C C8C C7C N2C 179.4(7) . . . . ?
 C20B C19B C18B C17B -5.5(9) . . . . ?
 C26A N8A C30A C29A -0.9(8) . . . . ?
 C21B C16B C17B C18B 2.4(10) . . . . ?
 C18C C19C C20C C21C -2(2) . . . . ?
 C18C C17C C16C O1C -178.2(12) . . . . ?
 C18C C17C C16C C21C -2(2) . . . . ?
 C4B C3B C2B C1B 0.6(7) . . . . ?
 C21A C16A C17A C18A -0.9(12) . . . . ?
 C29C C28C C27C C26C -2.8(10) . . . . ?
 C16A O1A C13A C14A 146.2(7) . . . . ?
 C16A O1A C13A C12A -27.9(11) . . . . ?
 C17B C16B C21B C20B -3.4(10) . . . . ?
 C16C O1C C13C C14C 124.5(14) . . . . ?
 C16C O1C C13C C12C -52.0(14) . . . . ?
 C16C C17C C18C C19C 0.2(17) . . . . ?
 C30B N8B C26B C27B 1.4(9) . . . . ?
 C5B N1B C1B C2B -2.0(9) . . . . ?
 C13A O1A C16A C21A 120.0(8) . . . . ?
 C13A O1A C16A C17A -63.2(10) . . . . ?
 C20C C19C C18C C17C 1.5(15) . . . . ?
 C14A C13A C12A C11A 6.8(12) . . . . ?
 C18A C19A C20A C21A -2.2(10) . . . . ?
 C26B N8B C30B C29B -0.2(9) . . . . ?
 C18B C19B C20B C21B 4.5(8) . . . . ?
 C7C N2C C6C N3C -0.3(7) . . . . ?
 C7C N2C C3C C2C -142.2(7) . . . . ?
 C7C N2C C3C C4C 35.1(11) . . . . ?
 C7C C8C C9C N4C -173.8(7) . . . . ?
 C13C O1C C16C C17C -54(2) . . . . ?
 C13C O1C C16C C21C 129.4(14) . . . . ?
 C30C N8C C26C C27C -1.6(13) . . . . ?
 C2C C3C C4C C5C 1.2(12) . . . . ?
 C2C C1C N1C C5C 3.6(15) . . . . ?
 C27C C28C C29C C30C 1.2(9) . . . . ?
 C26C N8C C30C C29C -0.2(12) . . . . ?
 C3C N2C C6C N3C 173.8(5) . . . . ?
 C3C N2C C7C C8C -175.6(6) . . . . ?
 C3C C2C C1C N1C -0.4(10) . . . . ?
 C3C C4C C5C N1C 2.0(16) . . . . ?
 C11C C10C C15C C14C 2.6(15) . . . . ?
 C1C C2C C3C N2C 175.0(6) . . . . ?
 C1C C2C C3C C4C -2.1(10) . . . . ?
 C1C N1C C5C C4C -4.6(18) . . . . ?
 C11A C10A C15A C14A 3.8(10) . . . . ?
 C12A C13A C14A C15A -8.9(12) . . . . ?
 C2ET O1ET C3ET C4ET 52(2) . . . . ?
 C3ET O1ET C2ET C1ET 166.4(13) . . . . ?
 O1F C16F C21F C20F -179.9(13) . . . . ?
 O1F C13F C14F C15F 179.7(18) . . . . ?
 O1F C13F C12F C11F -179.0(18) . . . . ?
 C19F N5C C22C C23C 172.2(11) . . . . ?
 C19F C20F C21F C16F -3(2) . . . . ?
 C17F C16F C21F C20F 8(2) . . . . ?
 C18F C19F C20F C21F -2(3) . . . . ?
 C18F C17F C16F O1F -179.3(13) . . . . ?
 C18F C17F C16F C21F -7(2) . . . . ?
 C16F O1F C13F C14F 163.4(17) . . . . ?
 C16F O1F C13F C12F -15(2) . . . . ?
 C16F C17F C18F C19F 1.9(14) . . . . ?
 C20F C19F C18F C17F 2.6(18) . . . . ?
 C13F O1F C16F C17F -83.1(19) . . . . ?
 C13F O1F C16F C21F 104.5(19) . . . . ?
 C10F N4C C9C C8C 173.9(10) . . . . ?
 C10F C15F C14F C13F 1(2) . . . . ?
 C10F C11F C12F C13F -2(3) . . . . ?
 C15F C10F C11F C12F 0(2) . . . . ?
 C14F C13F C12F C11F 3(2) . . . . ?
 C11F C10F C15F C14F 0.3(18) . . . . ?
 C12F C13F C14F C15F -2(2) . . . . ?
 O1D C13D C14D C15D 178.8(9) . . . . ?
 O1D C13D C12D C11D -177.8(13) . . . . ?
 O1D C16D C17D C18D 179.2(11) . . . . ?
 C10D N4A C9A C8A 174.8(5) . . . . ?
 C10D C15D C14D C13D 1.4(15) . . . . ?
 C15D C10D C11D C12D 6.9(19) . . . . ?
 C13D O1D C16D C21D 127.5(10) . . . . ?
 C13D O1D C16D C17D -54.7(13) . . . . ?
 C13D C12D C11D C10D -3(2) . . . . ?
 C14D C13D C12D C11D -2(2) . . . . ?
 C12D C13D C14D C15D 2.8(16) . . . . ?
 C19D N5A C22A C23A -176.1(6) . . . . ?
 C19D C20D C21D C16D 2.0(12) . . . . ?
 C19D C18D C17D C16D 5(2) . . . . ?
 C20D C19D C18D C17D -3.1(18) . . . . ?
 C20D C21D C16D O1D 177.4(9) . . . . ?
 C20D C21D C16D C17D -0.4(15) . . . . ?
 C21D C16D C17D C18D -3.0(18) . . . . ?
 C16D O1D C13D C14D 141.9(10) . . . . ?
 C16D O1D C13D C12D -42.4(16) . . . . ?
 C18D C19D C20D C21D -0.3(13) . . . . ?
 C11D C10D C15D C14D -6.1(14) . . . . ?

_smtbx_masks_special_details
;
A solvent mask was calculated and 121 electrons were 
found in a volume of 479 A^3 in 1 void per unit cell. 
This is attributed to the presence of an unknown
combination of solvent molecules per Asymmetric Unit 
which for which low residual electron density
prevented modelling.
;
loop_
  _smtbx_masks_void_nr
  _smtbx_masks_void_average_x
  _smtbx_masks_void_average_y
  _smtbx_masks_void_average_z
  _smtbx_masks_void_volume
  _smtbx_masks_void_count_electrons
  _smtbx_masks_void_content
 1 0.500 -0.156 0.156 479.4 121.1 '2 Unknown'

_smtbx_masks_void_probe_radius     1.2
_smtbx_masks_void_truncation_radius  1.2
_shelx_res_file
;
TITL cut81_a.res in P-1
    cut81_a.res
    created by SHELXL-2018/3 at 22:03:23 on 30-Nov-2022
REM Old TITL cut81 in P-1
REM SHELXT solution in P-1: R1 0.289, Rweak 0.015, Alpha 0.096
REM <I/s> 0.000 for 0 systematic absences, Orientation as input
REM Formula found by SHELXT: C231 B6 N54 O8 F1A Ni4
CELL 0.71073 16.23 17.69 20.43 80.452 89.74 72.245
ZERR 2 0.0033 0.0035 0.0041 0.03 0.03 0.03
LATT 1
SFAC C H B F N Ni O
UNIT 202 140 8 32 55 4 8.5
SADI N1C C1C N1C C5C
FLAT C2C C3C C1C N1C C4C C5C
RIGU C2C C3C C1C N1C C4C C5C
SADI C5C C4C C4C C3C C3C C2C C2C C1C
SADI N8C C26C N8C C30C
FLAT N8C C28C C29C C30C C27C C26C
RIGU N8C C28C C29C C30C C27C C26C
SADI C27C C26C C28C C27C C29C C28C C30C C29C
RIGU C10C C15C C14C C13C C11C C12C
SADI C11C C10C C15C C10C C15C C14C C14C C13C C13C C12C C12C C11C
SADI C21C C16C C17C C16C C18C C17C C19C C18C C20C C19C C21C C20C
FLAT C10C C15C C14C C13C C11C C12C
RIGU C19C C17C C18C C16C C20C C21C
FLAT C19C C17C C18C C16C C20C C21C
SADI C19C C18C C19F C18F
SADI 0.04 C14C C12C C14F C12F
SADI C19C C20C C19F C20F
SADI C10C C15C C10F C15F
SADI 0.04 C17C C21C C17F C21F
SADI 0.04 C18C C16C C18F C16F
SADI O1C C13C O1F C13F
SADI C15C C14C C15F C14F
SADI C14C C13C C14F C13F
SADI C17C C18C C17F C18F
SADI C17C C16C C17F C16F
SADI O1C C16C O1F C16F
SADI 0.04 C16C C13C C16F C13F
SADI N5C C19C N5C C19F
SADI N4C C10C N4C C10F
SADI 0.04 C10C C12C C10F C12F
SADI 0.04 C15C C11C C15F C11F
SADI C10C C11C C10F C11F
SADI 0.04 C10C C14C C10F C14F
SADI 0.04 C15C C13C C15F C13F
SADI C20C C21C C20F C21F
SADI C13C C12C C13F C12F
SADI 0.04 C18C C20C C18F C20F
SADI C11C C12C C11F C12F
SADI 0.04 N5C C18C N5C C18F
SADI 0.04 N5C C20C N5C C20F
SADI 0.04 N4C C15C N4C C15F
SADI 0.04 C13C C11C C13F C11F
SADI 0.04 N4C C11C N4C C11F
SADI 0.04 O1C C14C O1F C14F
SADI 0.04 O1C C17C O1F C17F
SADI 0.04 O1C C21C O1F C21F
SADI 0.04 O1C C12C O1F C12F
SADI 0.04 C19C C17C C19F C17F
SADI 0.04 C19C C21C C19F C21F
SADI 0.04 C16C C20C C16F C20F
SADI C16C C21C C16F C21F
SADI C21F C16F C17F C16F C18F C17F C19F C18F C20F C19F C21F C20F
RIGU C19F C17F C18F C16F C20F C21F
FLAT C13F C10F C15F C14F C12F C11F
RIGU C13F C10F C15F C14F C11F C12F
FLAT C19F C17F C18F C16F C20F C21F
SADI C11F C10F C15F C10F C15F C14F C14F C13F C13F C12F C12F C11F
SADI C20A C21A C20D C21D
SADI N4A C10A N4A C10D
SADI C10A C15A C10D C15D
SADI C19A C20A C19D C20D
SADI C10A C11A C10D C11D
SADI 0.04 C20A C16A C20D C16D
SADI C15A C14A C15D C14D
SADI C19A C18A C19D C18D
SADI 0.04 C19A C21A C19D C21D
SADI C21A C16A C21D C16D
SADI 0.04 C10A C12A C10D C12D
SADI 0.04 C15A C11A C15D C11D
SADI C16A C17A C16D C17D
SADI 0.04 C21A C17A C21D C17D
SADI O1A C16A O1D C16D
SADI O1A C13A O1D C13D
SADI 0.04 C19A C17A C19D C17D
SADI 0.04 C13A C11A C13D C11D
SADI 0.04 C20A C18A C20D C18D
SADI 0.04 C10A C14A C10D C14D
SADI 0.04 C15A C13A C15D C13D
SADI C13A C14A C13D C14D
SADI C13A C12A C13D C12D
SADI 0.04 C16A C18A C16D C18D
SADI N5A C19A N5A C19D
SADI C18A C17A C18D C17D
SADI 0.04 C14A C12A C14D C12D
SADI C11A C12A C11D C12D
SADI 0.04 N5A C20A N5A C20D
SADI 0.04 N5A C18A N5A C18D
SADI 0.04 N4A C15A N4A C15D
SADI 0.04 C16A C13A C16D C13D
SADI 0.04 N4A C11A N4A C11D
SADI 0.04 O1A C21A O1D C21D
SADI 0.04 O1A C14A O1D C14D
SADI 0.04 O1A C17A O1D C17D
SADI 0.04 O1A C12A O1D C12D
RIGU C19D C20D C21D C16D C18D C17D
FLAT C19D C20D C21D C16D C18D C17D
FLAT C10D C15D C13D C14D C12D C11D
FLAT C10A C15A C13A C14A C11A C12A
SADI C15A C10A C11A C10A C12A C11A C13A C12A C14A C13A C15A C14A
FLAT C19A C20A C21A C16A C18A C17A
RIGU C19A C20A C21A C16A C18A C17A
RIGU C10A C15A C13A C14A C11A C12A
SADI C17A C16A C18A C17A C19A C18A C20A C19A C21A C20A C21A C16A
RIGU C10D C15D C13D C14D C12D C11D
SADI C15D C10D C15D C14D C14D C13D C13D C12D C12D C11D C11D C10D
SADI C17D C16D C18D C17D C19D C18D C20D C19D C21D C20D C21D C16D
SADI C15B C10B C15B C14B C14B C13B C13B C12B C12B C11B C11B C10B
SADI C18B C17B C19B C18B C20B C19B C21B C20B C21B C16B C17B C16B
RIGU C10B C15B C11B C12B C13B C14B
FLAT C16B C19B C20B C21B C17B C18B
FLAT C10B C15B C11B C12B C13B C14B
RIGU C16B C19B C20B C21B C17B C18B
SADI N1B C1B N1B C5B
SADI C5B C4B C4B C3B C3B C2B C2B C1B
FLAT N1B C3B C2B C1B C4B C5B
RIGU N1B C3B C2B C1B C4B C5B
DFIX 1.37 N2C C6C
DFIX 1.28 N4C C9C
DFIX 1.36 C8C C7C
DFIX 1.44 C9C C8C
DFIX 1.38 N3C C8C
DFIX 1.37 N2C C7C
DFIX 1.32 N3C C6C
SADI B2 F7 B2 F5 B2 F6 B2 F8
SADI 0.04 F7 F5 F7 F6 F7 F8 F5 F6 F5 F8 F6 F8
RIGU B2 F7 F5 F6 F8
SADI 0.04 F14 F16 F14 F13 F14 F15 F16 F13 F16 F15 F13 F15
SADI B4 F14 B4 F16 B4 F13 B4 F15
RIGU B4 F14 F16 F13 F15
RIGU F11A B3A F9A F10A F12A
SADI 0.04 F9A F10A F9B F10B
SADI 0.04 F9A F12A F9B F12B
SADI 0.04 F10A F12A F10B F12B
SADI 0.04 F11A F10A F11B F10B
RIGU B1 F12B F11B F9B F10B
SADI B3A F11A B1 F11B
SADI 0.04 F11A F9A F11B F9B
SADI B3A F9A B1 F9B
SADI 0.04 F11A F12A F11B F12B
SADI B3A F10A B1 F10B
SADI B3A F12A B1 F12B
RIGU F3A B1A F2A F1A F4A
SADI 0.04 F1A F4A F1B F4B
SADI B1A F3A B1B F3B
SADI 0.04 F1A F3A F1B F3B
SADI 0.04 F2A F3A F2B F3B
RIGU B1B F3B F2B F1B F4B
SADI B1A F4A B1B F4B
SADI 0.04 F2A F1A F2B F1B
SADI 0.04 F2A F4A F2B F4B
SADI B1A F2A B1B F2B
SADI B1A F1A B1B F1B
SADI 0.04 F3A F4A F3B F4B
SADI 0.04 N1S4 C2S4 N1T4 C2T4
SADI N1S4 C1S4 N1T4 C1T4
SADI C1S4 C2S4 C1T4 C2T4
SADI 0.04 N1S2 C2S2 N1T2 C2T2
SADI N1S2 C1S2 N1T2 C1T2
SADI C1S2 C2S2 C1T2 C2T2
DANG 2.62 N1S2 C2S2
DANG 2.62 N1T2 C2T2
DFIX 1.45 C2T2 C1T2
DFIX 1.45 C2S2 C1S2
DFIX 1.16 N1T2 C1T2
DFIX 1.16 N1S2 C1S2
RIGU C2T2 C1T2 N1T2
RIGU N1S2 C1S2 C2S2
DANG 2.62 C2S1 N1S1
DFIX 1.16 N1S1 C1S1
DFIX 1.45 C1S1 C2S1
RIGU C2S1 N1S1 C1S1
RIGU C2S3 N1S3 C1S3
DANG 2.39 O1ET C1ET
DFIX 1.42 O1ET C2ET O1ET C3ET
DFIX 1.52 C4ET C3ET C2ET C1ET
DANG 2.38 C2ET C3ET
DANG 2.39 C4ET O1ET

L.S. 10
PLAN  30
SIZE 0.2 0.1 0.02
TEMP -173.15
CONF
LIST 6
MORE -1
BOND $H
ABIN
fmap 2
acta
REM <olex2.extras>
REM <HklSrc "%.\\cut81_a.hkl">
REM </olex2.extras>

WGHT    0.200000
FVAR       0.25944   0.51852   0.58871   0.59580   0.50770   0.54243   0.63342
NI2   6    0.219190    0.216779    0.447571    11.00000    0.04949    0.07703 =
         0.06458    0.00809    0.00635   -0.01731
NI1   6    0.754330    0.289905    0.091419    11.00000    0.05636    0.10308 =
         0.05531   -0.00103    0.00505   -0.03059
N7A   5    0.122277    0.017312    0.459182    11.00000    0.04779    0.08633 =
         0.05984   -0.00482    0.00544   -0.02124
N2A   5    0.881303    0.471237    0.084537    11.00000    0.05742    0.07471 =
         0.04839    0.00183    0.00512   -0.01496
O1B   7    0.613680    0.316864    0.420461    11.00000    0.05880    0.17859 =
         0.07697   -0.03776    0.01763   -0.04838
N6B   5    0.105368    0.313210    0.441266    11.00000    0.05278    0.07564 =
         0.07019    0.00365    0.00398   -0.01861
N6A   5    0.165970    0.124133    0.449836    11.00000    0.05091    0.08199 =
         0.06077   -0.00054    0.00856   -0.01805
N2B   5    0.987222    0.109375    0.064154    11.00000    0.07078    0.07977 =
         0.05560   -0.00103    0.00550   -0.02931
N5B   5    0.269231    0.316432    0.435503    11.00000    0.05054    0.08336 =
         0.06462    0.00748    0.00492   -0.02344
N7B   5   -0.018368    0.410961    0.438311    11.00000    0.05545    0.07990 =
         0.05937   -0.00604    0.00199   -0.01622
N5C   5    0.346889    0.133223    0.469848    11.00000    0.05564    0.08132 =
         0.06762    0.01700    0.00395   -0.02076
N3B   5    0.866941    0.202320    0.081248    11.00000    0.07190    0.08589 =
         0.05336    0.00220    0.00290   -0.03222
N3A   5    0.813245    0.379075    0.089643    11.00000    0.05484    0.09100 =
         0.05545   -0.00381    0.00657   -0.02240
N1A   5    1.086722    0.570799    0.074834    11.00000    0.08709    0.09324 =
         0.05246    0.00466    0.00516   -0.04272
N6C   5    0.228119    0.205167    0.550690    11.00000    0.06004    0.08002 =
         0.06524   -0.00019    0.01029   -0.02867
N4B   5    0.792599    0.238549    0.193908    11.00000    0.06271    0.11400 =
         0.04931   -0.00623    0.00291   -0.03686
N7C   5    0.230950    0.197799    0.658955    11.00000    0.08740    0.08383 =
         0.06475    0.00164    0.01046   -0.03910
N5A   5    0.204089    0.214050    0.343510    11.00000    0.05657    0.10510 =
         0.06207    0.00980    0.00959   -0.01992
N3C   5    0.722526    0.316878   -0.010367    11.00000    0.06292    0.09762 =
         0.05401    0.00992    0.00326   -0.03051
N4C   5    0.673237    0.216465    0.085142    11.00000    0.06806    0.11114 =
         0.04977    0.00381    0.00316   -0.03688
N4A   5    0.644989    0.390401    0.104091    11.00000    0.05634    0.11113 =
         0.07144    0.00427    0.00612   -0.02506
N8A   5    0.066456   -0.193514    0.543637    11.00000    0.05623    0.08558 =
         0.09620   -0.00258   -0.01106   -0.02100
PART 1
O1A   7    0.299791    0.392122    0.122723    31.00000    0.06901
PART 0
N2C   5    0.682280    0.355845   -0.115718    11.00000    0.08323    0.11435 =
         0.06835    0.02193    0.00112   -0.03224
C28A  1    0.103445   -0.054875    0.487852    11.00000    0.04119    0.08510 =
         0.06717   -0.00718    0.00480   -0.01816
C25A  1    0.148977    0.067517    0.492135    11.00000    0.04994    0.07696 =
         0.05688   -0.00239    0.00672   -0.01338
AFIX  43
H25A  2    0.154408    0.062033    0.539100    11.00000   -1.20000
AFIX   0
C2A   1    1.035704    0.456630    0.082394    11.00000    0.06091    0.07001 =
         0.04477    0.00695    0.00524   -0.02054
AFIX  43
H2A   2    1.049403    0.399859    0.086091    11.00000   -1.20000
AFIX   0
C8B   1    0.905221    0.155907    0.141532    11.00000    0.07270    0.09374 =
         0.05070    0.00062   -0.00025   -0.03574
N1B   5    1.187899   -0.031502   -0.036593    11.00000    0.10138    0.09087 =
         0.08899   -0.01307    0.01959   -0.03156
C3A   1    0.950724    0.505037    0.081871    11.00000    0.06271    0.07637 =
         0.04083    0.00726    0.00794   -0.02127
C6B   1    0.917999    0.172035    0.035609    11.00000    0.06423    0.08577 =
         0.05429   -0.00023    0.00338   -0.03061
AFIX  43
H6B   2    0.908051    0.191156   -0.010837    11.00000   -1.20000
AFIX   0
C22B  1    0.212031    0.384076    0.435016    11.00000    0.06272    0.07905 =
         0.06006   -0.00158    0.00928   -0.02569
AFIX  43
H22B  2    0.227627    0.431991    0.432785    11.00000   -1.20000
AFIX   0
C6A   1    0.889732    0.390228    0.085862    11.00000    0.05677    0.08361 =
         0.05462    0.00022    0.00757   -0.02227
AFIX  43
H6A   2    0.942983    0.349038    0.084265    11.00000   -1.20000
AFIX   0
N8B   5   -0.285206    0.531345    0.424911    11.00000    0.07064    0.10655 =
         0.10671   -0.03645    0.00618   -0.00436
PART 1
O1C   7    0.564592   -0.002258    0.274065    21.00000    0.06853    0.07421 =
         0.06128   -0.00805    0.02301   -0.03212
PART 0
C1A   1    1.100223    0.493154    0.077385    11.00000    0.06544    0.09563 =
         0.04647    0.00371    0.00374   -0.03163
AFIX  43
H1A   2    1.158229    0.459888    0.075672    11.00000   -1.20000
AFIX   0
C28B  1   -0.108259    0.451481    0.434364    11.00000    0.05696    0.09015 =
         0.05724   -0.01104    0.00042   -0.01625
C24B  1    0.046640    0.446532    0.435208    11.00000    0.05791    0.07973 =
         0.05744   -0.00279    0.00227   -0.01944
AFIX  43
H24B  2    0.039599    0.502382    0.431824    11.00000   -1.20000
AFIX   0
C3B   1    1.056179    0.061897    0.030354    11.00000    0.06818    0.07918 =
         0.06639   -0.00675    0.01002   -0.03007
C7A   1    0.794459    0.510978    0.087982    11.00000    0.05666    0.08373 =
         0.05148    0.00360    0.01030   -0.00940
AFIX  43
H7A   2    0.768333    0.566982    0.087577    11.00000   -1.20000
AFIX   0
C22C  1    0.371411    0.121040    0.531180    11.00000    0.06093    0.07712 =
         0.06384    0.01239    0.00349   -0.01482
AFIX  43
H22C  2    0.428746    0.089100    0.546061    11.00000   -1.20000
AFIX   0
C24A  1    0.124308    0.043452    0.391672    11.00000    0.05805    0.10245 =
         0.06055   -0.00521    0.01096   -0.03203
AFIX  43
H24A  2    0.109972    0.020231    0.356328    11.00000   -1.20000
AFIX   0
C8A   1    0.753936    0.454030    0.092059    11.00000    0.05354    0.09896 =
         0.05371   -0.00053    0.01188   -0.01361
C25B  1    0.021142    0.330181    0.441437    11.00000    0.05427    0.07524 =
         0.06699    0.00256   -0.00158   -0.01845
AFIX  43
H25B  2   -0.008766    0.291364    0.443471    11.00000   -1.20000
AFIX   0
C23B  1    0.122899    0.385902    0.437946    11.00000    0.05698    0.07710 =
         0.05999   -0.00105    0.00571   -0.01987
C9A   1    0.662652    0.458040    0.098450    11.00000    0.04665    0.12088 =
         0.05258    0.00674    0.00036   -0.00964
C23A  1    0.151482    0.110053    0.386978    11.00000    0.04784    0.10590 =
         0.05865    0.00229    0.00866   -0.02134
C9B   1    0.862190    0.177255    0.200900    11.00000    0.06392    0.09987 =
         0.05430   -0.00215    0.00334   -0.03275
AFIX  43
H9B   2    0.884188    0.147360    0.243591    11.00000   -1.20000
AFIX   0
PART 1
C19C  1    0.407168    0.091077    0.424662    21.00000    0.06411    0.07727 =
         0.04867    0.01408    0.01131   -0.02033
PART 0
C10B  1    0.748495    0.257367    0.253303    11.00000    0.05335    0.11525 =
         0.05760   -0.00726    0.00334   -0.02770
C4A   1    0.934347    0.587241    0.078800    11.00000    0.07078    0.08011 =
         0.05300   -0.00238    0.00986   -0.02194
AFIX  43
H4A   2    0.876907    0.622400    0.078846    11.00000   -1.20000
AFIX   0
C23C  1    0.309516    0.157202    0.577699    11.00000    0.06937    0.07788 =
         0.06587    0.01043   -0.00212   -0.02423
C29A  1    0.117814   -0.084120    0.555059    11.00000    0.06521    0.10239 =
         0.07434   -0.00084    0.00106   -0.04051
AFIX  43
H29A  2    0.140998   -0.057442    0.583474    11.00000   -1.20000
AFIX   0
PART 1
C10C  1    0.645468    0.158162    0.133109    21.00000    0.05903    0.07528 =
         0.04407    0.00223   -0.00182   -0.02571
PART 0
C7B   1    0.979627    0.098619    0.132592    11.00000    0.07379    0.08833 =
         0.05433   -0.00247    0.00591   -0.03117
AFIX  43
H7B   2    1.017959    0.059853    0.165610    11.00000   -1.20000
AFIX   0
PART 1
C15C  1    0.705835    0.091873    0.170810    21.00000    0.05896    0.07280 =
         0.05354   -0.00362   -0.00169   -0.02258
AFIX  43
H15C  2    0.765878    0.081892    0.163949    21.00000   -1.20000
AFIX   0
PART 0
C5A   1    1.004583    0.616174    0.075671    11.00000    0.09882    0.07825 =
         0.05769   -0.00125    0.01077   -0.03530
AFIX  43
H5A   2    0.993488    0.672402    0.074000    11.00000   -1.20000
AFIX   0
C27A  1    0.068963   -0.095282    0.449696    11.00000    0.07014    0.08677 =
         0.06936   -0.00884   -0.00600   -0.01784
AFIX  43
H27A  2    0.056271   -0.075758    0.403505    11.00000   -1.20000
AFIX   0
N8C   5    0.147684    0.234632    0.849228    11.00000    0.13973    0.14009 =
         0.07413   -0.01797    0.01623   -0.06975
C25C  1    0.182106    0.227818    0.599967    11.00000    0.06563    0.08431 =
         0.07147    0.00214    0.00430   -0.03007
AFIX  43
H25C  2    0.123186    0.260420    0.596058    11.00000   -1.20000
AFIX   0
PART 1
C19A  1    0.229172    0.253462    0.282274    31.00000    0.05564
PART 0
C16B  1    0.529634    0.312573    0.421745    11.00000    0.05314    0.11573 =
         0.06832   -0.00750    0.00646   -0.03097
C30A  1    0.097746   -0.152387    0.579402    11.00000    0.06888    0.10445 =
         0.07313   -0.00697   -0.00106   -0.03908
AFIX  43
H30A  2    0.107078   -0.171815    0.625840    11.00000   -1.20000
AFIX   0
C15B  1    0.723795    0.336230    0.263513    11.00000    0.05884    0.11637 =
         0.06602   -0.00204    0.00270   -0.01842
AFIX  43
H15B  2    0.737293    0.376739    0.232708    11.00000   -1.20000
AFIX   0
C19B  1    0.359409    0.314204    0.430841    11.00000    0.05285    0.07733 =
         0.06965    0.00539    0.00679   -0.02014
C22A  1    0.171759    0.159812    0.331640    11.00000    0.05800    0.11607 =
         0.06447   -0.00173    0.00952   -0.03732
AFIX  43
H22A  2    0.161778    0.153228    0.287452    11.00000   -1.20000
AFIX   0
C11B  1    0.729110    0.198212    0.298598    11.00000    0.07407    0.12412 =
         0.05698   -0.00520    0.00769   -0.04021
AFIX  43
H11B  2    0.747130    0.143866    0.291720    11.00000   -1.20000
AFIX   0
PART 1
C14C  1    0.678377    0.040210    0.218525    21.00000    0.07102    0.05832 =
         0.05859   -0.00098    0.00400   -0.02336
AFIX  43
H14C  2    0.720361   -0.003824    0.244942    21.00000   -1.20000
AFIX   0
PART 0
C8C   1    0.665249    0.278430   -0.025407    11.00000    0.07913    0.10873 =
         0.05285    0.01169   -0.00346   -0.04103
C24C  1    0.311000    0.153067    0.643975    11.00000    0.08337    0.08406 =
         0.07189    0.00318    0.00017   -0.01969
AFIX  43
H24C  2    0.358613    0.124503    0.674474    11.00000   -1.20000
AFIX   0
C28C  1    0.202607    0.209623    0.723634    11.00000    0.10356    0.09070 =
         0.06866   -0.01300    0.02123   -0.05155
PART 1
C17C  1    0.538089    0.075822    0.361691    21.00000    0.05251    0.09203 =
         0.06491   -0.00616    0.00728   -0.03020
AFIX  43
H17C  2    0.591439    0.086820    0.354233    21.00000   -1.20000
AFIX   0
PART 0
C2B   1    1.064250    0.084792   -0.036902    11.00000    0.09742    0.08996 =
         0.06153    0.00002    0.00693   -0.02651
AFIX  43
H2B   2    1.025053    0.132596   -0.061251    11.00000   -1.20000
AFIX   0
C12B  1    0.683530    0.218589    0.353719    11.00000    0.08445    0.14646 =
         0.05595   -0.01824    0.00770   -0.06021
C13B  1    0.659540    0.294924    0.364375    11.00000    0.05229    0.14811 =
         0.05966   -0.01820    0.00953   -0.03956
C6C   1    0.734172    0.362235   -0.065538    11.00000    0.06546    0.09112 =
         0.06368    0.00425    0.00805   -0.02096
AFIX  43
H6C   2    0.772256    0.394076   -0.069776    11.00000   -1.20000
AFIX   0
C14B  1    0.678368    0.355572    0.320214    11.00000    0.05515    0.12810 =
         0.07736   -0.01535    0.00264   -0.01942
AFIX  43
H14B  2    0.660712    0.409429    0.328309    11.00000   -1.20000
AFIX   0
PART 1
C20A  1    0.194365    0.334658    0.271555    31.00000    0.06816
AFIX  43
H20A  2    0.154231    0.359601    0.301450    31.00000   -1.20000
AFIX   0
PART 0
C27B  1   -0.140586    0.535020    0.415994    11.00000    0.06790    0.09114 =
         0.06912   -0.01998    0.00256   -0.00852
AFIX  43
H27B  2   -0.102857    0.566748    0.405915    11.00000   -1.20000
AFIX   0
C29B  1   -0.165824    0.407103    0.449339    11.00000    0.05836    0.10096 =
         0.10218   -0.02350    0.00023   -0.01766
AFIX  43
H29B  2   -0.145463    0.350299    0.463079    11.00000   -1.20000
AFIX   0
C1B   1    1.130833    0.036248   -0.067642    11.00000    0.08666    0.10078 =
         0.07161   -0.01084    0.00949   -0.02490
AFIX  43
H1B   2    1.136263    0.052172   -0.113796    11.00000   -1.20000
AFIX   0
PART 1
C10A  1    0.556009    0.385218    0.109337    31.00000    0.05781
C15A  1    0.504714    0.395757    0.052276    31.00000    0.06090
AFIX  43
H15A  2    0.527722    0.403306    0.009709    31.00000   -1.20000
AFIX   0
PART 0
C9C   1    0.641615    0.223693    0.027851    11.00000    0.08771    0.11221 =
         0.05429    0.00433    0.00225   -0.05016
AFIX  43
H9C   2    0.603538    0.194621    0.019211    11.00000   -1.20000
AFIX   0
C20B  1    0.407134    0.312737    0.486607    11.00000    0.05905    0.12430 =
         0.07772   -0.02793    0.01617   -0.02402
AFIX  43
H20B  2    0.381496    0.312232    0.528508    11.00000   -1.20000
AFIX   0
C26A  1    0.052910   -0.164886    0.479403    11.00000    0.07492    0.08976 =
         0.08798   -0.01144   -0.01174   -0.02659
AFIX  43
H26A  2    0.030956   -0.193753    0.452238    11.00000   -1.20000
AFIX   0
C21B  1    0.492644    0.311990    0.481985    11.00000    0.06134    0.13326 =
         0.06606   -0.02924    0.01368   -0.03032
AFIX  43
H21B  2    0.525477    0.311074    0.520650    11.00000   -1.20000
AFIX   0
PART 1
C18C  1    0.485861    0.105157    0.411105    21.00000    0.08156    0.08511 =
         0.06298   -0.01304    0.01752   -0.04119
AFIX  43
H18C  2    0.504724    0.136824    0.437417    21.00000   -1.20000
AFIX   0
PART 0
C4B   1    1.114219   -0.006764    0.063796    11.00000    0.09781    0.08128 =
         0.06908    0.00546    0.01300   -0.02599
AFIX  43
H4B   2    1.109984   -0.024207    0.109885    11.00000   -1.20000
AFIX   0
PART 1
C21A  1    0.216713    0.382135    0.217154    31.00000    0.06749
AFIX  43
H21A  2    0.190551    0.438932    0.208794    31.00000   -1.20000
AFIX   0
PART 0
C29C  1    0.115819    0.229920    0.736259    11.00000    0.09928    0.12931 =
         0.07900   -0.02616    0.01979   -0.05101
AFIX  43
H29C  2    0.073120    0.235907    0.702500    11.00000   -1.20000
AFIX   0
PART 1
C16A  1    0.276216    0.345869    0.176599    31.00000    0.05805
PART 0
C17B  1    0.483717    0.309655    0.365626    11.00000    0.07046    0.17627 =
         0.05517    0.00621    0.00496   -0.05594
AFIX  43
H17B  2    0.510205    0.307990    0.324106    11.00000   -1.20000
AFIX   0
PART 1
C16C  1    0.510493    0.030188    0.323599    21.00000    0.05955    0.06759 =
         0.05642   -0.00078    0.01184   -0.02509
PART 0
C30B  1   -0.253220    0.448437    0.443531    11.00000    0.05720    0.13461 =
         0.12138   -0.05367    0.00510   -0.02285
AFIX  43
H30B  2   -0.293136    0.418823    0.452680    11.00000   -1.20000
AFIX   0
C5B   1    1.180389   -0.050782    0.027875    11.00000    0.09566    0.08827 =
         0.09591   -0.00548    0.02797   -0.01808
AFIX  43
H5B   2    1.222339   -0.097312    0.051433    11.00000   -1.20000
AFIX   0
PART 1
C13A  1    0.387358    0.388452    0.120712    31.00000    0.06176
C20C  1    0.384181    0.042505    0.385265    21.00000    0.06974    0.07880 =
         0.05790    0.01056    0.01492   -0.03504
AFIX  43
H20C  2    0.331891    0.029711    0.393409    21.00000   -1.20000
AFIX   0
C14A  1    0.419866    0.395194    0.057807    31.00000    0.06302
AFIX  43
H14A  2    0.384758    0.399321    0.019491    31.00000   -1.20000
AFIX   0
C18A  1    0.284807    0.216410    0.238570    31.00000    0.06261
AFIX  43
H18A  2    0.305762    0.159301    0.243874    31.00000   -1.20000
AFIX   0
PART 0
C26B  1   -0.228453    0.569649    0.412999    11.00000    0.07014    0.09754 =
         0.09086   -0.02799   -0.00442   -0.01061
AFIX  43
H26B  2   -0.249927    0.626661    0.401188    11.00000   -1.20000
AFIX   0
C18B  1    0.398859    0.309199    0.370876    11.00000    0.06401    0.16523 =
         0.05814    0.01447   -0.00230   -0.05135
AFIX  43
H18B  2    0.367477    0.305425    0.333050    11.00000   -1.20000
AFIX   0
C7C   1    0.638274    0.304894   -0.090203    11.00000    0.10166    0.15232 =
         0.06913    0.01338   -0.02076   -0.06367
AFIX  43
H7C   2    0.596334    0.290367   -0.113329    11.00000   -1.20000
AFIX   0
PART 1
C13C  1    0.591246    0.051399    0.228480    21.00000    0.06935    0.05484 =
         0.06277   -0.01224    0.01744   -0.02374
PART 0
C30C  1    0.093532    0.241183    0.799984    11.00000    0.11380    0.15204 =
         0.07913   -0.02745    0.02735   -0.06063
AFIX  43
H30C  2    0.033731    0.254861    0.808785    11.00000   -1.20000
AFIX   0
C2C   1    0.745408    0.412750   -0.211966    11.00000    0.10121
AFIX  43
H2C   2    0.800994    0.392075   -0.189663    11.00000   -1.20000
AFIX   0
PART 1
C21C  1    0.434124    0.012291    0.335026    21.00000    0.06639    0.09731 =
         0.08204   -0.01830    0.01907   -0.04324
AFIX  43
H21C  2    0.416277   -0.020132    0.308883    21.00000   -1.20000
AFIX   0
C17A  1    0.309775    0.263553    0.186793    31.00000    0.06330
AFIX  43
H17A  2    0.351012    0.238643    0.157564    31.00000   -1.20000
AFIX   0
PART 0
C27C  1    0.261572    0.200308    0.774734    11.00000    0.10863    0.18535 =
         0.07782   -0.02246    0.01880   -0.08107
AFIX  43
H27C  2    0.322076    0.184061    0.768427    11.00000   -1.20000
AFIX   0
C26C  1    0.229587    0.215446    0.835582    11.00000    0.13625    0.17836 =
         0.07955   -0.03451    0.01641   -0.07015
AFIX  43
H26C  2    0.270214    0.211636    0.870258    11.00000   -1.20000
AFIX   0
C3C   1    0.672656    0.403032   -0.180610    11.00000    0.10089
PART 1
C11C  1    0.558559    0.172266    0.146773    21.00000    0.06722    0.07006 =
         0.05942    0.00528    0.01232   -0.02013
AFIX  43
H11C  2    0.516421    0.218668    0.123229    21.00000   -1.20000
AFIX   0
PART 0
C1C   1    0.734618    0.453729   -0.277155    11.00000    0.12639
AFIX  43
H1C   2    0.783082    0.461802   -0.300140    11.00000   -1.20000
AFIX   0
PART 1
C11A  1    0.525394    0.369373    0.172290    31.00000    0.07236
AFIX  43
H11A  2    0.563152    0.357300    0.210590    31.00000   -1.20000
AFIX   0
C12A  1    0.440380    0.371209    0.179015    31.00000    0.07349
AFIX  43
H12A  2    0.418245    0.361167    0.221605    31.00000   -1.20000
AFIX   0
PART 0
N1C   5    0.656581    0.481335   -0.306878    11.00000    0.16440
PART 1
C12C  1    0.532320    0.119364    0.194485    21.00000    0.06906    0.08305 =
         0.06312    0.00619    0.01915   -0.02464
AFIX  43
H12C  2    0.472710    0.130683    0.203500    21.00000   -1.20000
AFIX   0
PART 0
C4C   1    0.589226    0.434257   -0.210227    11.00000    0.13620
AFIX  43
H4C   2    0.539585    0.428083   -0.187923    11.00000   -1.20000
AFIX   0
C5C   1    0.584602    0.475307   -0.275291    11.00000    0.16248
AFIX  43
H5C   2    0.529566    0.499677   -0.298061    11.00000   -1.20000
AFIX   0

F7    4    0.887889   -0.038611    0.239359    11.00000    0.10192    0.12477 =
         0.07112   -0.01038   -0.01529   -0.01228
F5    4    0.950463    0.015005    0.311400    11.00000    0.09159    0.10104 =
         0.09021    0.00413   -0.00627   -0.02468
F6    4    0.825582   -0.013408    0.338108    11.00000    0.13342    0.20604 =
         0.09709   -0.04807    0.02037   -0.08205
F8    4    0.944878   -0.112726    0.340237    11.00000    0.21656    0.11836 =
         0.11319    0.01138   -0.07483   -0.05929
B2    3    0.904074   -0.037597    0.305811    11.00000    0.11189    0.08674 =
         0.08184   -0.01235   -0.01867   -0.01638
F14   4    0.143003    0.569850    0.401524    11.00000    0.11351    0.08474 =
         0.08788    0.00296    0.02525   -0.03633
F16   4    0.074860    0.659343    0.309178    11.00000    0.12037    0.19979 =
         0.09381    0.02301    0.02438   -0.02605
F13   4    0.006839    0.644864    0.405725    11.00000    0.14087    0.13321 =
         0.13737    0.03939    0.06431    0.01117
F15   4    0.114997    0.703251    0.392451    11.00000    0.25314    0.10085 =
         0.18073   -0.02338    0.08335   -0.06020
B4    3    0.082871    0.641982    0.376891    11.00000    0.14337    0.11136 =
         0.07782    0.02057    0.02948   -0.02708
PART 1
N1S2  5    0.118179    0.775557    0.129438    71.00000    0.09507

PART 0
N1S1  5    0.079746    0.250092    0.078511    11.00000    0.08392    0.08914 =
         0.14290   -0.00634    0.00117   -0.02347

PART 1
C1S2  1    0.112920    0.803243    0.177277    71.00000    0.07091

PART 0
C1S1  1    0.145516    0.211306    0.066587    11.00000    0.07115    0.09318 =
         0.13985   -0.02427   -0.00281   -0.02060

PART 1
C2S2  1    0.100753    0.833754    0.240241    71.00000    0.10177

PART 0
C2S1  1    0.233432    0.160680    0.049089    11.00000    0.09651    0.14921 =
         0.23100   -0.05122    0.02371   -0.02168
AFIX 137
H2SA  2    0.231114    0.153866    0.002567    11.00000   -1.50000
H2SB  2    0.249541    0.107748    0.077875    11.00000   -1.50000
H2SC  2    0.276599    0.187628    0.055489    11.00000   -1.50000
AFIX   0

O1ET  7   -0.039761    0.427495    0.278038    11.00000    0.18932
C1ET  1   -0.030809    0.290786    0.278357    11.00000    0.16326
C2ET  1   -0.063207    0.373895    0.258871    11.00000    0.15088
C3ET  1   -0.053095    0.515307    0.256917    11.00000    0.16863
C4ET  1   -0.156007    0.551360    0.248551    11.00000    0.25014
PART 2
O1F   7    0.590836    0.017335    0.293633   -21.00000    0.09182    0.09272 =
         0.09638    0.01744    0.04239   -0.01644
C19F  1    0.411144    0.106068    0.424929   -21.00000    0.05019    0.07330 =
         0.08957    0.03587    0.01908    0.00195
C17F  1    0.554747    0.079106    0.389590   -21.00000    0.05594    0.07242 =
         0.10513    0.02902    0.01742   -0.00930
AFIX  43
H17F  2    0.612968    0.078902    0.394701   -21.00000   -1.20000
AFIX   0
C18F  1    0.494631    0.109213    0.433199   -21.00000    0.05786    0.06399 =
         0.10462    0.02553    0.02570   -0.00999
AFIX  43
H18F  2    0.509759    0.131920    0.468589   -21.00000   -1.20000
AFIX   0
C16F  1    0.529083    0.049211    0.338307   -21.00000    0.06489    0.09027 =
         0.08398    0.02960    0.02604   -0.01518
C20F  1    0.387579    0.070810    0.375793   -21.00000    0.05617    0.09953 =
         0.06697    0.04263    0.02055   -0.00729
AFIX  43
H20F  2    0.330253    0.068112    0.372113   -21.00000   -1.20000
AFIX   0
C13F  1    0.605885    0.073181    0.243432   -21.00000    0.08289    0.07924 =
         0.07172   -0.00507    0.03919   -0.03370
C21F  1    0.448303    0.039537    0.332089   -21.00000    0.06763    0.12747 =
         0.07101    0.01780    0.01677   -0.01969
AFIX  43
H21F  2    0.435183    0.012429    0.299029   -21.00000   -1.20000
AFIX   0
C10F  1    0.649831    0.171225    0.142941   -21.00000    0.07544    0.13968 =
         0.05698   -0.00373    0.01422   -0.05211
C15F  1    0.703259    0.093581    0.161104   -21.00000    0.10704    0.12197 =
         0.07162   -0.02963    0.04728   -0.05360
AFIX  43
H15F  2    0.754680    0.075074    0.138237   -21.00000   -1.20000
AFIX   0
C14F  1    0.682639    0.042562    0.212215   -21.00000    0.08567    0.12331 =
         0.07037   -0.01309    0.04462   -0.02125
AFIX  43
H14F  2    0.719036   -0.011241    0.225741   -21.00000   -1.20000
AFIX   0
C11F  1    0.573891    0.203402    0.173641   -21.00000    0.07945    0.11443 =
         0.12426    0.03605    0.02693   -0.02092
AFIX  43
H11F  2    0.537823    0.257281    0.159872   -21.00000   -1.20000
AFIX   0
C12F  1    0.553954    0.152050    0.225625   -21.00000    0.07310    0.12004 =
         0.09864    0.03559    0.02217   -0.01196
AFIX  43
H12F  2    0.503655    0.171389    0.249486   -21.00000   -1.20000
AFIX   0
O1D   7    0.294889    0.424606    0.138287   -31.00000    0.05770
C10D  1    0.554407    0.414279    0.115388   -31.00000    0.06349
C15D  1    0.499020    0.423628    0.064509   -31.00000    0.05424
AFIX  43
H15D  2    0.519119    0.428944    0.020754   -31.00000   -1.20000
AFIX   0
C13D  1    0.382911    0.420351    0.133308   -31.00000    0.06036
C14D  1    0.412983    0.425971    0.072500   -31.00000    0.05066
AFIX  43
H14D  2    0.376080    0.431532    0.034873   -31.00000   -1.20000
AFIX   0
C12D  1    0.437194    0.416114    0.184432   -31.00000    0.10609
AFIX  43
H12D  2    0.416917    0.413934    0.228187   -31.00000   -1.20000
AFIX   0
C19D  1    0.225901    0.277298    0.292927   -31.00000    0.05504
C20D  1    0.184088    0.357850    0.282111   -31.00000    0.05488
AFIX  43
H20D  2    0.138344    0.380046    0.309212   -31.00000   -1.20000
AFIX   0
C21D  1    0.208898    0.407226    0.231145   -31.00000    0.06266
AFIX  43
H21D  2    0.181115    0.463770    0.224299   -31.00000   -1.20000
AFIX   0
C16D  1    0.272815    0.375668    0.190584   -31.00000    0.05237
C18D  1    0.292574    0.244497    0.253297   -31.00000    0.08167
AFIX  43
H18D  2    0.323420    0.188547    0.262482   -31.00000   -1.20000
AFIX   0
C17D  1    0.313914    0.293838    0.200223   -31.00000    0.07360
AFIX  43
H17D  2    0.356437    0.271415    0.170832   -31.00000   -1.20000
AFIX   0
C11D  1    0.520361    0.414900    0.174587   -31.00000    0.09149
AFIX  43
H11D  2    0.555713    0.414477    0.211664   -31.00000   -1.20000
AFIX   0

PART 0
O1W   7    0.500000    0.000000    0.000000    10.25000    0.14899

PART 1
AFIX   6
B3A   3    0.236592   -0.011593    0.229909    41.00000    0.08411    0.13301 =
         0.08651   -0.02174   -0.00040   -0.02449
F11A  4    0.270632   -0.044912    0.294999    41.00000    0.10167    0.16253 =
         0.09012   -0.01771   -0.00060   -0.04279
F9A   4    0.146992    0.025398    0.231038    41.00000    0.07695    0.25279 =
         0.11416   -0.08732   -0.00581   -0.01732
F10A  4    0.276123    0.045885    0.202378    41.00000    0.18216    0.13449 =
         0.15012   -0.00776    0.00099   -0.07233
F12A  4    0.252601   -0.072735    0.191360    41.00000    0.11495    0.12081 =
         0.10039   -0.02300    0.01062   -0.04727
AFIX   6

PART 2
B1    3    0.209260   -0.006670    0.245068   -41.00000    0.09655    0.16950 =
         0.08342   -0.02625   -0.02225   -0.05732
F11B  4    0.209719   -0.067408    0.298959   -41.00000    0.14776    0.15355 =
         0.10715   -0.02432   -0.00876   -0.06431
F9B   4    0.130141    0.055241    0.240477   -41.00000    0.07672    0.23814 =
         0.05513   -0.01248    0.00531   -0.06623
F10B  4    0.277271    0.024289    0.254647   -41.00000    0.05181    0.14593 =
         0.16589   -0.04043   -0.00419   -0.02900
F12B  4    0.219930   -0.038922    0.186179   -41.00000    0.23497    0.11580 =
         0.10002   -0.02646   -0.02767   -0.05165
AFIX   6

PART 1
B1A   3    0.410522    0.286779   -0.085283    51.00000    0.12587
F2A   4    0.441430    0.352820   -0.103403    51.00000    0.14809
F1A   4    0.325272    0.313767   -0.065312    51.00000    0.17055
F3A   4    0.412302    0.247588   -0.139823    51.00000    0.17137
F4A   4    0.463154    0.232989   -0.032613    51.00000    0.15205
AFIX   6

PART 2
B1B   3    0.396720    0.285939   -0.053631   -51.00000    0.10720
F2B   4    0.418242    0.357838   -0.066553   -51.00000    0.10739
F1B   4    0.307079    0.302991   -0.063870   -51.00000    0.10221
F3B   4    0.440138    0.234337   -0.096600   -51.00000    0.22723
F4B   4    0.421590    0.248510    0.012339   -51.00000    0.17055
AFIX   6

PART 1
N1S4  5    0.678041    0.114026    0.515632    61.00000    0.08325
C1S4  1    0.691579    0.155866    0.549722    61.00000    0.10649
C2S4  1    0.708507    0.208136    0.592353    61.00000    0.18852
AFIX 137
H2SD  2    0.766966    0.212155    0.585717    61.00000   -1.50000
H2SE  2    0.703935    0.185632    0.638909    61.00000   -1.50000
H2SF  2    0.666032    0.261858    0.581172    61.00000   -1.50000
AFIX   6

PART 2
N1T4  5    0.677204    0.072804    0.502800   -61.00000    0.08249
C1T4  1    0.654002    0.101382    0.549521   -61.00000    0.10273
C2T4  1    0.624880    0.137119    0.608032   -61.00000    0.17008
AFIX 137
H2TA  2    0.636152    0.094594    0.647309   -61.00000   -1.50000
H2TB  2    0.562618    0.165734    0.602389   -61.00000   -1.50000
H2TC  2    0.656248    0.175109    0.613823   -61.00000   -1.50000
AFIX   0

N1T2  5    0.130449    0.787899    0.131916   -71.00000    0.07445
C1T2  1    0.146468    0.791994    0.185510   -71.00000    0.09336
C2T2  1    0.163056    0.804559    0.252201   -71.00000    0.11782
PART 1
AFIX   6
N1S3  5    0.643504    0.523683    0.228756    10.50000   10.15000
C1S3  1    0.617249    0.591131    0.234292    10.50000   10.15000
C2S3  1    0.584386    0.675422    0.241150    10.50000   10.15000
AFIX   0
HKLF 4


REM  cut81_a.res in P-1
REM wR2 = 0.3899, GooF = S = 1.725, Restrained GooF = 1.732 for all data
REM R1 = 0.1109 for 16141 Fo > 4sig(Fo) and 0.1239 for all 20663 data
REM 1435 parameters refined using 912 restraints

END

WGHT      0.2000      0.0000

REM Highest difference peak  1.328,  deepest hole -0.811,  1-sigma level  0.107
Q1    1  -0.1534  0.4741  0.2533  11.00000  0.05    1.33
Q2    1   0.2222  0.2378  0.4617  11.00000  0.05    1.29
Q3    1   0.5564 -0.0021  0.0367  11.00000  0.05    1.00
Q4    1   0.7423  0.3234  0.0921  11.00000  0.05    0.99
Q5    1  -0.0055  0.5483  0.2546  11.00000  0.05    0.97
Q6    1   0.7150  0.5851  0.2437  11.00000  0.05    0.96
Q7    1   0.5731 -0.0199  0.0156  11.00000  0.05    0.93
Q8    1   0.3000  0.4536  0.1550  11.00000  0.05    0.88
Q9    1   1.0076 -0.1048  0.3047  11.00000  0.05    0.83
Q10   1   0.2595  0.3123  0.0162  11.00000  0.05    0.83
Q11   1   0.2215  0.1362  0.1007  11.00000  0.05    0.78
Q12   1   0.4119  0.1787  0.0386  11.00000  0.05    0.77
Q13   1   0.8892 -0.0627  0.3415  11.00000  0.05    0.76
Q14   1   0.3254  0.3432 -0.1482  11.00000  0.05    0.75
Q15   1   0.3257  0.2758  0.0171  11.00000  0.05    0.75
Q16   1   0.6609  0.5612  0.2417  11.00000  0.05    0.74
Q17   1   0.0634  0.5847  0.3153  11.00000  0.05    0.74
Q18   1   0.6264  0.4264 -0.3165  11.00000  0.05    0.72
Q19   1  -0.0320  0.4086  0.2494  11.00000  0.05    0.72
Q20   1   0.7137  0.2791  0.6469  11.00000  0.05    0.70
Q21   1   0.5732  0.6429  0.2998  11.00000  0.05    0.70
Q22   1   0.6602  0.3625 -0.2000  11.00000  0.05    0.69
Q23   1   0.3813  0.2762  0.0333  11.00000  0.05    0.65
Q24   1   0.4273  0.2233 -0.0078  11.00000  0.05    0.65
Q25   1   0.5883  0.3745 -0.2238  11.00000  0.05    0.65
Q26   1   0.7165  0.3884 -0.2296  11.00000  0.05    0.62
Q27   1   0.5227  0.6991  0.1788  11.00000  0.05    0.62
Q28   1   0.6818  0.1411  0.5261  11.00000  0.05    0.61
Q29   1  -0.0569  0.3167  0.2978  11.00000  0.05    0.59
Q30   1   0.5751  0.4113 -0.2933  11.00000  0.05    0.59
;
_shelx_res_checksum                92126
_shelx_hkl_file
;
   0   0  -1  132.62    4.71
   0   0  -1  132.22    4.71
   0   0   1  134.91    4.78
   0   0   1  135.05    4.78
   0   0  -1  129.73    3.03
   0   0  -1  132.15    3.10
   0   0  -2 1030.85   36.47
   0   0  -2 1030.85   36.47
   0   0   2 1028.83   36.40
   0   0   2  985.77   34.86
   0   0  -2 1017.39   23.48
   0   0  -2 1001.92   23.08
   0   0   2 1009.99   23.28
   0   0   2  984.42   22.74
   0   0  -3  198.90    7.07
   0   0  -3  205.23    7.33
   0   0   3  199.78    7.13
   0   0   3  204.49    7.27
   0   0  -3  201.86    4.78
   0   0  -3  201.59    4.78
   0   0   3  200.65    4.78
   0   0   3  205.23    4.91
   0   0  -4  103.49    3.77
   0   0  -4  105.24    3.84
   0   0   4   99.12    3.63
   0   0   4  103.83    3.77
   0   0  -4  100.06    2.49
   0   0  -4   97.37    2.49
   0   0   4   99.45    2.49
   0   0   4   99.05    2.56
   0   0  -5  509.91   18.10
   0   0  -5  515.76   18.37
   0   0   5  522.22   18.57
   0   0   5  512.73   18.24
   0   0  -5  517.18   12.11
   0   0  -5  521.28   12.25
   0   0   5  514.75   12.04
   0   0   5  524.58   12.31
   0   0  -6 7556.44  266.93
   0   0  -6 7462.24  263.70
   0   0   6 7428.60  262.36
   0   0   6 7516.07  265.45
   0   0  -6 7583.36  174.34
   0   0  -6 7401.68  170.31
   0   0   6 7502.61  172.53
   0   0   6 7529.53  173.27
   0   0  -7   57.67    2.22
   0   0  -7   60.22    2.36
   0   0   7   64.80    2.56
   0   0   7   57.80    2.22
   0   0  -7   62.38    1.82
   0   0  -7   64.87    1.95
   0   0   7   72.60    2.02
   0   0   7   67.42    2.02
   0   0  -8 2730.55   96.63
   0   0  -8 2515.90   89.02
   0   0   8 2665.28   94.34
   0   0   8 2563.00   90.64
   0   0  -8 2709.69   62.58
   0   0  -8 2681.43   61.97
   0   0   8 2661.24   61.43
   0   0   8 2638.36   61.03
   0   0  -9  756.99   26.92
   0   0  -9  742.19   26.44
   0   0   9  744.88   26.58
   0   0   9  733.44   26.04
   0   0  -9  754.30   17.76
   0   0  -9  761.03   17.97
   0   0   9  756.32   17.76
   0   0   9  745.55   17.63
   0   0 -10   62.51    2.42
   0   0 -10   64.53    2.62
   0   0  10   66.48    2.56
   0   0  10   67.02    2.69
   0   0 -10   62.85    2.02
   0   0 -10   59.68    2.02
   0   0  10   65.74    2.02
   0   0  10   66.55    2.22
   0   0 -11  624.70   22.34
   0   0  11  612.86   21.87
   0   0 -11  674.90   16.08
   0   0 -11  665.95   15.88
   0   0  11  633.58   15.07
   0   0  11  648.19   15.54
   0   0 -12  173.47    6.39
   0   0 -12  167.14    6.19
   0   0  12  163.11    6.12
   0   0  12  176.63    6.46
   0   0 -12  175.69    4.71
   0   0 -12  167.01    4.51
   0   0  12  165.80    4.37
   0   0  12  164.86    4.58
   0   0 -13   70.85    2.83
   0   0 -13   78.26    3.10
   0   0  13   82.16    3.30
   0   0  13   76.24    2.96
   0   0 -13   85.79    2.76
   0   0 -13   82.63    2.69
   0   0  13   86.53    2.83
   0   0  13   81.49    2.56
   0   0 -14   28.46    1.35
   0   0 -14   27.45    1.35
   0   0  14   25.23    1.35
   0   0  14   27.39    1.21
   0   0 -14   25.50    1.41
   0   0  14   20.39    1.41
   0   0 -15   41.72    1.82
   0   0 -15   40.10    1.82
   0   0  15   38.76    1.88
   0   0  15   40.84    1.68
   0   0 -15   36.87    1.68
   0   0  15   34.92    1.55
   0   0 -16    0.07    0.34
   0   0 -16   -0.20    0.47
   0   0  16    1.01    0.54
   0   0  16    0.13    0.34
   0   0 -16    0.20    0.74
   0   0 -16    0.87    0.74
   0   0  16    0.27    0.67
   0   0  16    0.94    0.81
   0   0 -17  136.39    5.18
   0   0 -17  132.76    5.11
   0   0  17  139.02    5.45
   0   0  17  137.00    5.11
   0   0 -17  136.59    4.17
   0   0 -17  135.32    4.10
   0   0  17  142.79    4.10
   0   0  17  138.55    4.37
   0   0 -18   27.59    1.41
   0   0 -18   26.51    1.41
   0   0  18   25.64    1.48
   0   0  18   28.33    1.35
   0   0 -18   24.63    1.55
   0   0 -18   27.39    1.68
   0   0  18   24.36    1.41
   0   0  18   26.31    1.82
   0   0 -19  108.00    4.31
   0   0 -19  115.26    4.58
   0   0  19  117.35    4.78
   0   0  19  113.31    4.31
   0   0 -19  113.78    3.84
   0   0 -19  120.78    3.97
   0   0  19  120.71    3.77
   0   0  19  117.22    4.17
   0   0 -20    0.40    0.40
   0   0 -20    0.61    0.54
   0   0  20    1.08    0.61
   0   0  20    0.67    0.40
   0   0 -20    0.00    0.81
   0   0 -20    1.28    0.94
   0   0  20    0.20    0.81
   0   0  20    2.02    1.08
   0   0 -21   -0.40    0.54
   0   0  21    0.81    0.40
   0   0  21    1.14    0.61
   0   0 -21    1.01    0.94
   0   0 -21    2.22    0.94
   0   0  21    0.13    0.81
   0   0  21    1.35    1.01
   0   0 -22    5.92    0.67
   0   0 -22    4.98    0.74
   0   0  22    4.51    0.54
   0   0  22    5.18    0.74
   0   0 -22    4.31    1.08
   0   0 -22    4.10    1.08
   0   0  22    3.57    1.01
   0   0  22    4.44    1.14
   0   0 -23    9.02    0.81
   0   0 -23    9.29    0.87
   0   0  23    8.34    0.94
   0   0  23    9.15    0.74
   0   0 -23    9.22    1.41
   0   0 -23    8.07    1.28
   0   0  23    8.21    1.21
   0   0  23    6.33    1.35
   0   0 -24    1.95    1.01
   0   0 -24   -0.94    1.01
   0   0  24    1.28    1.08
   0   0  24    0.87    1.01
   0  -1  24   -0.13    0.94
   0  -1  24    0.13    0.94
   0   1 -24   -0.34    0.94
   0   1 -24    0.47    1.01
   0  -1  23    1.08    0.61
   0  -1  23    0.67    0.40
   0   1 -23    0.67    0.54
   0   1 -23    0.67    0.40
   0  -1  23   -0.61    0.94
   0  -1  23    2.09    1.08
   0   1 -23   -0.07    0.87
   0   1 -23   -1.21    0.94
   0  -1  22    4.24    0.54
   0  -1  22    4.91    0.74
   0   1 -22    4.17    0.61
   0  -1  22    4.64    1.08
   0  -1  22    3.77    1.14
   0   1 -22    2.83    0.94
   0   1 -22    1.14    1.08
   0  -1  21    0.34    0.34
   0  -1  21    0.27    0.54
   0   1 -21    0.20    0.54
   0   1 -21    0.07    0.40
   0  -1  21   -0.87    0.74
   0  -1  21   -1.08    0.94
   0   1 -21   -0.87    0.81
   0   1 -21   -0.34    0.87
   0  -1  20    9.82    0.67
   0  -1  20   10.09    0.87
   0   1 -20   10.30    0.87
   0   1 -20   11.04    0.81
   0  -1  20   12.25    1.14
   0  -1  20    9.02    1.35
   0   1 -20    7.94    1.14
   0   1 -20   10.83    1.28
   0  -1  19   29.54    1.41
   0  -1  19   28.26    1.61
   0   1 -19   26.85    1.48
   0   1 -19   31.22    1.55
   0  -1  19   30.15    1.68
   0  -1  19   32.63    2.02
   0   1 -19   29.54    1.75
   0   1 -19   28.19    1.75
   0  -1  18   10.09    0.94
   0   1 -18   10.90    0.81
   0  -1  18   12.38    1.14
   0  -1  18   11.84    1.28
   0   1 -18    9.89    1.14
   0   1 -18    8.81    1.21
   0  -1  17   23.48    1.41
   0  -1  17   22.74    1.14
   0   1 -17   22.74    1.28
   0   1 -17   23.55    1.21
   0  -1  17   21.73    1.35
   0  -1  17   22.88    1.61
   0  -1  16    4.17    0.47
   0  -1  16    3.23    0.61
   0   1 -16    3.97    0.61
   0   1 -16    4.37    0.54
   0  -1  16    2.76    0.74
   0  -1  16    3.43    0.94
   0   1 -16    1.61    0.74
   0   1 -16    2.69    0.87
   0  -1  15    2.76    0.40
   0  -1  15    3.57    0.61
   0   1 -15    3.10    0.54
   0   1 -15    2.83    0.47
   0   1 -15    2.69    0.94
   0  -1  14   33.64    1.48
   0  -1  14   33.58    1.68
   0   1 -14   33.31    1.61
   0   1 -14   32.84    1.48
   0  -1  14   33.24    1.48
   0  -1  14   32.10    1.68
   0  -1  13   36.60    1.55
   0  -1  13   35.53    1.68
   0   1 -13   33.24    1.61
   0   1 -13   35.66    1.61
   0   1 -13   34.59    1.55
   0   1 -13   34.52    1.61
   0  -1  12   18.24    0.94
   0  -1  12   20.32    1.14
   0   1 -12   17.49    1.01
   0   1 -12   17.36    0.94
   0  -1  12   18.24    1.21
   0  -1  12   20.19    1.08
   0   1 -12   20.99    1.14
   0   1 -12   19.18    1.21
   0  -1  11  761.03   27.12
   0  -1  11  792.65   28.33
   0   1 -11  763.72   27.25
   0   1 -11  780.54   27.79
   0  -1  11  804.09   18.98
   0  -1  11  808.80   19.24
   0   1 -11  805.44   19.04
   0   1 -11  792.65   18.84
   0  -1  10  557.75   13.26
   0  -1  10  562.66   13.52
   0   1 -10  577.06   13.73
   0   1 -10  555.93   13.32
   0  -1   9  148.24    5.45
   0  -1   9  137.27    5.18
   0   1  -9  142.92    5.32
   0   1  -9  146.69    5.38
   0  -1   9  130.07    3.43
   0  -1   9  129.26    3.50
   0   1  -9  127.04    3.36
   0   1  -9  130.14    3.57
   0  -1   8   64.80    2.49
   0  -1   8   65.74    2.62
   0  -1   8   65.61    1.88
   0  -1   8   63.72    2.02
   0   1  -7    4.37    0.54
   0   1  -7    2.89    0.34
   0  -1   7    5.18    0.54
   0  -1   7    5.32    0.67
   0   1  -7    3.57    0.54
   0   1  -7    3.63    0.67
   0  -1   6 1197.73   42.39
   0  -1   6 1168.79   41.52
   0   1  -6 1178.89   41.85
   0   1  -6 1201.76   42.59
   0  -1   6 1160.72   26.92
   0  -1   6 1159.37   26.98
   0   1  -6 1181.58   27.39
   0   1  -6 1175.52   27.32
   0  -1   5 2929.72  103.56
   0  -1   5 2816.68   99.65
   0   1  -5 2866.47  101.40
   0   1  -5 2881.27  101.87
   0  -1   5 2850.32   65.67
   0  -1   5 2801.20   64.60
   0   1  -5 2839.55   65.40
   0   1  -5 2849.65   65.67
   0  -1   4  425.26   15.14
   0  -1   4  419.00   14.94
   0   1  -4  417.79   14.87
   0   1  -4  423.17   15.07
   0  -1   4  416.51    9.76
   0  -1   4  412.41    9.69
   0   1  -4  403.80    9.49
   0   1  -4  399.56    9.42
   0   1  -3 3774.86  133.43
   0   1  -3 4015.75  141.84
   0  -1   3 3830.03   88.08
   0  -1   3 3690.75   84.92
   0   1  -3 3817.92   87.74
   0   1  -3 3747.94   86.20
   0  -1   2   92.66    3.36
   0  -1   2   96.09    3.50
   0   1  -2   94.61    3.43
   0   1  -2   91.31    3.30
   0  -1   2   92.45    2.22
   0  -1   2   95.35    2.36
   0   1  -2   93.80    2.29
   0   1  -2   94.07    2.29
   0  -1   1   53.36    1.95
   0  -1   1   54.10    1.95
   0   1  -1   52.48    1.88
   0   1  -1   51.48    1.88
   0  -1   1   52.89    1.28
   0  -1   1   53.36    1.35
   0   1  -1   53.02    1.35
   0   1  -1   53.02    1.28
   0  -1   0    8.41    0.34
   0  -1   0    8.81    0.34
   0   1   0    8.81    0.34
   0   1   0    8.48    0.34
   0  -1   0    8.95    0.34
   0  -1   0    8.81    0.27
   0   1   0    8.28    0.27
   0   1   0    8.68    0.27
   0  -1  -1 1864.55   65.87
   0  -1  -1 1928.47   68.10
   0   1   1 2059.01   72.74
   0  -1  -1 2052.96   47.24
   0  -1  -1 2109.48   48.51
   0   1   1 2056.32   47.30
   0   1   1 2158.60   49.66
   0  -1  -2  118.09    4.24
   0  -1  -2  114.79    4.10
   0   1   2  121.99    4.37
   0   1   2  116.21    4.17
   0  -1  -2  122.13    2.96
   0  -1  -2  123.14    2.96
   0   1   2  126.50    3.03
   0   1   2  121.19    2.96
   0  -1  -3 1098.81   38.89
   0  -1  -3 1059.11   37.48
   0   1   3 1047.67   37.08
   0   1   3 1069.21   37.82
   0  -1  -3 1047.67   24.22
   0  -1  -3 1030.18   23.82
   0   1   3 1018.07   23.55
   0   1   3 1044.31   24.16
   0  -1  -4 2625.58   92.79
   0  -1  -4 2672.01   94.47
   0   1   4 2724.49   96.29
   0   1   4 2654.51   93.80
   0  -1  -4 2722.47   62.71
   0  -1  -4 2597.99   59.89
   0   1   4 2695.56   62.11
   0   1   4 2764.86   63.72
   0  -1  -5  298.36   10.63
   0  -1  -5  313.36   11.17
   0   1   5  299.43   10.70
   0   1   5  312.08   11.10
   0  -1  -5  316.66    7.54
   0  -1  -5  312.69    7.47
   0   1   5  314.91    7.54
   0   1   5  309.59    7.47
   0  -1  -6 8377.36  295.93
   0  -1  -6 8148.58  287.79
   0   1   6 8175.49  288.87
   0   1   6 8088.02  285.64
   0  -1  -6 8451.38  194.33
   0  -1  -6 8162.04  187.67
   0   1   6 8310.07  191.03
   0   1   6 8538.85  196.28
   0  -1  -7  304.48   10.90
   0  -1  -7  301.18   10.83
   0   1   7  310.20   11.17
   0   1   7  297.95   10.63
   0  -1  -7  311.61    7.54
   0  -1  -7  309.12    7.54
   0   1   7  311.95    7.54
   0   1   7  314.57    7.67
   0  -1  -8 1144.57   40.57
   0  -1  -8 1102.18   39.09
   0   1   8 1168.79   41.52
   0   1   8 1124.38   39.83
   0  -1  -8 1163.41   27.12
   0  -1  -8 1143.22   26.71
   0   1   8 1149.28   26.78
   0   1   8 1143.90   26.78
   0  -1  -9   20.52    0.94
   0  -1  -9   20.52    1.01
   0   1   9   19.24    1.01
   0   1   9   20.59    0.94
   0  -1  -9   20.25    1.01
   0  -1  -9   19.24    1.08
   0  -1 -10  314.37   11.30
   0  -1 -10  307.17   11.10
   0   1  10  317.94   11.51
   0   1  10  320.43   11.51
   0  -1 -10  324.46    8.01
   0  -1 -10  314.24    7.74
   0   1  10  312.69    7.67
   0   1  10  309.93    7.74
   0  -1 -11   91.38    2.76
   0  -1 -11   86.06    2.62
   0   1  11   82.76    2.49
   0   1  11   85.39    2.76
   0  -1 -12 1579.92   56.05
   0  -1 -12 1525.42   54.10
   0   1  12 1548.97   55.04
   0   1  12 1511.29   53.56
   0   1  12 1613.57   37.61
   0   1  12 1618.28   37.88
   0  -1 -13   36.67    1.61
   0  -1 -13   37.01    1.68
   0   1  13   36.40    1.75
   0   1  13   37.41    1.55
   0  -1 -13   35.66    1.55
   0  -1 -13   33.17    1.55
   0   1  13   35.66    1.48
   0   1  13   33.91    1.61
   0  -1 -14  495.78   17.83
   0  -1 -14  507.28   18.24
   0   1  14  502.71   18.17
   0   1  14  478.62   17.16
   0  -1 -15   22.54    1.14
   0  -1 -15   22.68    1.21
   0   1  15   21.33    1.21
   0   1  15   21.60    1.08
   0  -1 -15   21.80    1.35
   0  -1 -15   24.69    1.41
   0   1  15   21.87    1.28
   0   1  15   23.48    1.48
   0  -1 -16   15.41    0.94
   0  -1 -16   16.62    1.08
   0   1  16   16.49    1.08
   0   1  16   16.01    0.87
   0  -1 -16   14.13    1.21
   0  -1 -16   17.49    1.35
   0   1  16   15.41    1.14
   0   1  16   14.33    1.35
   0  -1 -17   15.34    0.94
   0  -1 -17   17.43    1.08
   0   1  17   17.90    1.21
   0   1  17   17.49    0.94
   0  -1 -17   15.88    1.28
   0  -1 -17   16.55    1.41
   0   1  17   15.21    1.14
   0   1  17   18.44    1.48
   0  -1 -18   94.47    3.70
   0  -1 -18   98.78    3.90
   0   1  18   95.95    3.90
   0   1  18   98.24    3.77
   0  -1 -18   94.81    3.23
   0  -1 -18   96.36    3.36
   0   1  18   97.50    3.16
   0   1  18   98.17    3.57
   0  -1 -19    0.47    0.61
   0  -1 -19    1.01    0.87
   0  -1 -19    0.87    0.87
   0   1  19    0.47    0.74
   0   1  19    2.69    1.08
   0  -1 -20   80.01    3.30
   0  -1 -20   82.16    3.36
   0   1  20   75.03    3.23
   0   1  20   79.40    3.10
   0  -1 -20   76.78    3.03
   0  -1 -20   70.85    2.96
   0   1  20   72.54    2.76
   0   1  20   73.41    3.16
   0  -1 -21   -0.27    0.40
   0   1  21    0.67    0.54
   0   1  21    0.61    0.40
   0  -1 -21   -0.87    0.87
   0  -1 -21   -1.08    0.87
   0   1  21    0.74    0.81
   0   1  21   -0.67    1.01
   0  -1 -22   -0.13    0.40
   0  -1 -22   -0.87    0.47
   0   1  22    0.47    0.61
   0   1  22    0.34    0.40
   0  -1 -22    0.81    0.87
   0  -1 -22    1.75    0.94
   0   1  22    0.61    0.87
   0   1  22    0.20    1.01
   0  -1 -23   23.08    1.41
   0  -1 -23   23.01    1.35
   0   1  23   22.00    1.48
   0  -1 -23   20.12    1.75
   0  -1 -23   19.78    1.75
   0   1  23   21.13    1.68
   0   1  23   19.72    1.88
   0  -1 -24    0.94    0.47
   0   1  24    0.74    0.67
   0  -1 -24    0.40    0.94
   0  -1 -25   14.60    1.68
   0  -1 -25   10.16    1.61
   0   1  25   13.79    1.68
   0   1  25   11.30    1.61
   0  -2  24    1.21    1.08
   0  -2  24    1.61    1.01
   0  -2  23    0.81    0.40
   0  -2  23    1.08    0.54
   0   2 -23    1.75    0.47
   0  -2  23    1.41    0.94
   0  -2  23    0.47    0.94
   0   2 -23    1.82    0.87
   0   2 -23    0.40    0.94
   0  -2  22    2.62    0.67
   0  -2  22    2.76    0.47
   0   2 -22    1.55    0.61
   0  -2  22    2.22    1.14
   0  -2  22    3.10    1.01
   0   2 -22    4.51    1.14
   0   2 -22    2.42    0.94
   0  -2  21    1.08    0.40
   0  -2  21    0.61    0.61
   0   2 -21   -0.34    0.54
   0   2 -21    0.81    0.40
   0  -2  21   -0.54    0.81
   0  -2  21    0.20    0.94
   0   2 -21    0.20    0.94
   0   2 -21    0.87    0.81
   0  -2  20    1.55    0.40
   0  -2  20    1.01    0.54
   0   2 -20    0.61    0.54
   0   2 -20    2.02    0.47
   0  -2  20    1.41    0.87
   0  -2  20    1.21    1.01
   0   2 -20    2.09    1.08
   0   2 -20    0.34    0.81
   0  -2  19    0.61    0.47
   0  -2  19    0.00    0.34
   0   2 -19    0.00    0.54
   0   2 -19    0.47    0.40
   0  -2  19    0.54    0.81
   0  -2  19    0.61    0.94
   0   2 -19   -0.94    0.74
   0   2 -19    1.08    0.94
   0   2 -18   28.33    1.61
   0  -2  18   29.74    1.61
   0  -2  18   31.15    1.88
   0   2 -18   27.25    1.82
   0   2 -18   33.31    1.75
   0  -2  17   10.63    0.87
   0  -2  17   12.65    0.81
   0   2 -17   11.98    0.94
   0   2 -17   11.91    0.81
   0  -2  17    9.82    1.01
   0  -2  17    9.08    1.14
   0   2 -17    9.02    1.21
   0   2 -17    9.89    1.08
   0  -2  16   67.42    2.69
   0  -2  16   69.51    2.96
   0   2 -16   71.19    2.96
   0   2 -16   66.55    2.69
   0  -2  16   68.16    2.42
   0  -2  16   68.97    2.62
   0   2 -16   73.41    2.62
   0   2 -16   72.27    2.69
   0  -2  15    0.54    0.27
   0  -2  15   -0.13    0.40
   0   2 -15    0.40    0.47
   0   2 -15    0.20    0.34
   0  -2  14    5.11    0.47
   0  -2  14    4.64    0.61
   0   2 -14    5.72    0.67
   0   2 -14    4.78    0.54
   0  -2  14    4.64    0.74
   0  -2  14    4.91    0.87
   0   2 -14    4.31    0.74
   0   2 -14    3.63    0.87
   0  -2  13    1.88    0.34
   0  -2  13    2.83    0.54
   0   2 -13    2.76    0.54
   0   2 -13    2.42    0.40
   0  -2  13    2.96    0.61
   0  -2  13    2.02    0.74
   0   2 -13    1.75    0.74
   0   2 -13    1.88    0.67
   0  -2  12  212.76    7.74
   0  -2  12  207.85    7.74
   0   2 -12  219.16    8.14
   0   2 -12  225.75    8.28
   0  -2  12  219.09    5.65
   0  -2  12  218.82    5.79
   0   2 -12  224.74    5.92
   0   2 -12  228.04    5.85
   0  -2  11  177.64    6.53
   0  -2  11  183.83    6.86
   0   2 -11  189.15    7.07
   0   2 -11  181.95    6.73
   0  -2  11  183.63    4.71
   0  -2  11  188.94    5.05
   0   2 -11  182.62    4.78
   0   2 -11  179.86    4.84
   0  -2  10  100.26    3.77
   0   2 -10   92.39    3.63
   0  -2  10   91.85    2.62
   0  -2  10   91.71    2.76
   0  -2   9   53.43    2.22
   0  -2   9   53.02    2.09
   0   2  -9   53.43    2.22
   0   2  -9   54.03    2.15
   0  -2   9   54.50    1.82
   0  -2   9   53.49    1.68
   0  -2   8  116.00    4.31
   0  -2   8  114.32    4.31
   0   2  -8  119.17    4.51
   0   2  -8  112.51    4.17
   0  -2   8  115.40    3.03
   0  -2   8  108.20    2.96
   0   2  -8  111.83    3.10
   0   2  -8  108.47    2.89
   0  -2   7  161.49    5.85
   0  -2   7  164.12    6.06
   0   2  -7  159.47    5.92
   0   2  -7  157.45    5.79
   0  -2   7  170.64    4.24
   0  -2   7  164.92    4.24
   0   2  -7  161.36    4.17
   0   2  -7  162.23    4.10
   0  -2   6  257.44    9.22
   0  -2   6  263.84    9.55
   0   2  -6  270.50    9.82
   0   2  -6  263.97    9.49
   0  -2   6  271.64    6.53
   0  -2   6  271.37    6.59
   0   2  -6  270.23    6.53
   0   2  -6  270.09    6.59
   0  -2   5  339.13   12.11
   0  -2   5  329.71   11.84
   0   2  -5  339.80   12.18
   0   2  -5  334.76   11.98
   0  -2   5  328.90    7.81
   0  -2   5  323.18    7.74
   0   2  -5  329.37    7.81
   0   2  -5  318.81    7.67
   0  -2   4  630.56   22.41
   0  -2   4  623.63   22.21
   0   2  -4  626.45   22.27
   0   2  -4  646.17   22.95
   0  -2   4  623.15   14.53
   0  -2   4  623.42   14.53
   0   2  -4  606.47   14.20
   0   2  -4  612.05   14.27
   0  -2   3  214.99    7.67
   0  -2   3  226.29    8.14
   0   2  -3  217.74    7.87
   0   2  -3  222.12    7.94
   0  -2   3  224.20    5.32
   0  -2   3  219.90    5.25
   0   2  -3  219.29    5.25
   0   2  -3  219.09    5.18
   0  -2   2  277.83    9.96
   0  -2   2  276.49    9.82
   0   2  -2  270.23    9.62
   0  -2   2  272.99    6.39
   0  -2   2  275.28    6.53
   0   2  -2  272.05    6.46
   0   2  -2  270.16    6.33
   0  -2   1    1.21    0.20
   0  -2   1    1.28    0.27
   0   2  -1    1.48    0.20
   0   2  -1    0.87    0.27
   0  -2   1    0.87    0.34
   0  -2   1    1.21    0.27
   0   2  -1    0.87    0.34
   0   2  -1    0.87    0.27
   0  -2   0  137.33    4.91
   0  -2   0  137.54    4.91
   0   2   0  139.42    4.98
   0   2   0  133.70    4.78
   0  -2   0  136.46    3.30
   0  -2   0  137.74    3.30
   0   2   0  137.47    3.30
   0   2   0  135.92    3.30
   0  -2  -1   47.77    1.75
   0  -2  -1   51.07    1.88
   0   2   1   47.71    1.75
   0   2   1   48.72    1.75
   0  -2  -1   46.03    1.28
   0  -2  -1   46.43    1.28
   0   2   1   48.85    1.35
   0   2   1   48.51    1.28
   0  -2  -2  158.80    5.65
   0  -2  -2  155.50    5.52
   0   2   2  155.10    5.52
   0   2   2  155.10    5.52
   0  -2  -2  168.96    4.10
   0  -2  -2  166.87    4.04
   0   2   2  167.41    4.04
   0   2   2  162.97    3.97
   0  -2  -3   53.36    1.95
   0  -2  -3   52.75    1.95
   0   2   3   55.71    2.09
   0   2   3   53.56    1.95
   0  -2  -3   53.70    1.55
   0  -2  -3   53.70    1.55
   0   2   3   56.12    1.61
   0   2   3   55.31    1.55
   0  -2  -4  151.73    5.45
   0  -2  -4  164.72    5.92
   0   2   4  156.78    5.65
   0   2   4  155.91    5.58
   0  -2  -4  150.86    3.77
   0  -2  -4  149.99    3.77
   0   2   4  146.55    3.70
   0   2   4  148.03    3.70
   0  -2  -5   11.78    0.61
   0  -2  -5   11.51    0.61
   0  -2  -5   10.16    0.74
   0  -2  -5   12.11    0.74
   0   2   5   12.85    0.74
   0   2   5   11.98    0.81
   0  -2  -6 2091.31   74.02
   0  -2  -6 2176.77   76.98
   0   2   6 2104.10   74.42
   0   2   6 2097.37   74.15
   0  -2  -6 2248.77   51.95
   0  -2  -6 2217.14   51.27
   0   2   6 2284.43   52.82
   0   2   6 2141.78   49.52
   0  -2  -7   68.70    2.62
   0  -2  -7   75.70    2.83
   0   2   7   72.47    2.76
   0   2   7   72.67    2.69
   0  -2  -7   63.12    1.88
   0  -2  -7   61.23    1.88
   0   2   7   64.87    1.88
   0   2   7   63.86    2.02
   0  -2  -8  467.32   16.69
   0  -2  -8  464.83   16.62
   0   2   8  471.42   16.89
   0   2   8  468.19   16.69
   0  -2  -8  506.88   12.11
   0  -2  -8  494.70   11.84
   0   2   8  485.48   11.64
   0   2   8  484.41   11.57
   0  -2  -9   13.19    0.74
   0  -2  -9   12.78    0.67
   0   2   9   12.85    0.81
   0   2   9   12.18    0.67
   0  -2  -9   11.51    0.81
   0  -2  -9   12.92    0.94
   0   2   9   14.13    0.87
   0   2   9   12.85    0.94
   0  -2 -10   33.78    1.48
   0  -2 -10   32.63    1.41
   0   2  10   32.97    1.35
   0   2  10   37.55    1.68
   0  -2 -10   36.34    1.41
   0  -2 -10   37.34    1.48
   0   2  10   36.07    1.55
   0   2  10   36.87    1.41
   0  -2 -11  763.05   18.10
   0  -2 -11  777.85   18.50
   0   2  11  732.77   17.36
   0   2  11  746.90   17.90
   0  -2 -12  573.97   20.52
   0  -2 -12  586.21   20.93
   0   2  12  590.45   21.20
   0   2  12  573.29   20.46
   0  -2 -12  623.36   15.01
   0  -2 -12  609.76   14.67
   0   2  12  593.61   14.27
   0   2  12  628.20   15.21
   0  -2 -13   53.22    2.22
   0  -2 -13   51.48    2.09
   0   2  13   53.56    2.15
   0   2  13   49.32    2.15
   0  -2 -13   50.13    1.95
   0  -2 -14    1.88    0.47
   0  -2 -14    1.82    0.40
   0   2  14    2.36    0.54
   0   2  14    1.48    0.34
   0  -2 -14    1.82    0.74
   0   2  14    1.28    0.61
   0   2  14    1.82    0.87
   0  -2 -15    1.88    0.47
   0  -2 -15    2.02    0.40
   0   2  15    2.83    0.40
   0   2  15    2.09    0.54
   0  -2 -15    2.36    0.74
   0  -2 -15    1.35    0.74
   0   2  15    0.94    0.67
   0  -2 -16   25.17    1.28
   0  -2 -16   25.84    1.28
   0   2  16   26.24    1.48
   0   2  16   26.92    1.21
   0  -2 -16   26.58    1.48
   0  -2 -16   21.94    1.48
   0   2  16   24.76    1.41
   0   2  16   24.16    1.61
   0  -2 -17   16.69    1.01
   0  -2 -17   16.01    0.94
   0   2  17   17.56    0.94
   0   2  17   16.01    1.08
   0  -2 -17   14.80    1.35
   0  -2 -17   17.70    1.35
   0   2  17   17.63    1.48
   0   2  17   16.75    1.21
   0  -2 -18   22.00    1.21
   0  -2 -18   21.67    1.14
   0   2  18   19.51    1.21
   0   2  18   20.66    1.08
   0  -2 -18   21.60    1.55
   0  -2 -18   20.12    1.41
   0   2  18   21.60    1.68
   0   2  18   21.46    1.35
   0  -2 -19    2.49    0.94
   0  -2 -19    2.69    0.94
   0   2  19    2.09    0.81
   0   2  19    3.10    1.08
   0  -2 -20   38.49    1.95
   0   2  20   43.54    2.15
   0   2  20   41.99    1.82
   0  -2 -20   43.47    2.36
   0  -2 -20   38.09    2.02
   0   2  20   43.60    2.09
   0   2  20   45.62    2.49
   0  -2 -21   -0.13    0.47
   0  -2 -21    0.34    0.40
   0   2  21    0.94    0.54
   0   2  21   -0.13    0.40
   0  -2 -21    0.81    0.94
   0  -2 -21   -1.01    0.87
   0   2  21    1.08    0.87
   0   2  21    1.21    1.08
   0  -2 -22    4.71    0.61
   0  -2 -22    5.72    0.74
   0   2  22    5.18    0.81
   0   2  22    5.99    0.61
   0  -2 -22    4.71    1.08
   0  -2 -22    5.25    1.14
   0   2  22    4.98    1.28
   0   2  22    6.53    1.14
   0   2  23    3.43    0.54
   0  -2 -23    2.62    1.08
   0  -2 -23    3.84    1.28
   0   2  23    2.36    1.14
   0   2  23    5.58    1.21
   0   2  24    6.46    0.67
   0   2  24    4.91    0.87
   0  -2 -24    4.91    1.21
   0  -2 -25   -0.13    1.08
   0  -2 -25    1.61    1.08
   0   2  25    0.20    1.08
   0   2  25   -0.07    1.08
   0  -3  23   -0.13    0.87
   0  -3  23   -0.07    0.94
   0   3 -23    0.27    0.94
   0   3 -23    1.35    0.81
   0  -3  22    0.07    0.40
   0  -3  22    0.07    0.54
   0   3 -22   -0.34    0.47
   0   3 -22   -0.27    0.40
   0  -3  22   -1.48    1.08
   0  -3  22    1.28    0.87
   0   3 -22    0.07    0.74
   0   3 -22    0.47    0.94
   0  -3  21    1.82    0.61
   0  -3  21    2.09    0.40
   0   3 -21    1.75    0.47
   0   3 -21    1.88    0.61
   0  -3  21    1.95    1.08
   0  -3  21    1.08    0.87
   0   3 -21    3.57    1.08
   0   3 -21    0.87    0.74
   0  -3  20    1.08    0.54
   0  -3  20    0.34    0.34
   0   3 -20    0.94    0.40
   0   3 -20    0.81    0.61
   0  -3  20    1.82    1.01
   0  -3  20    0.47    0.81
   0   3 -20    0.67    1.01
   0   3 -20    1.48    0.81
   0  -3  19   83.77    3.57
   0  -3  19   84.24    3.30
   0   3 -19   83.44    3.50
   0   3 -19   83.37    3.36
   0   3 -19   83.30    3.23
   0   3 -19   82.29    3.03
   0  -3  18   -0.67    0.47
   0  -3  18    0.00    0.34
   0   3 -18    0.54    0.40
   0   3 -18    0.27    0.61
   0  -3  18    0.40    0.94
   0  -3  18    0.40    0.74
   0   3 -18   -0.27    0.74
   0   3 -18    0.47    1.01
   0  -3  17    0.47    0.47
   0  -3  17    0.07    0.34
   0   3 -17    0.13    0.40
   0  -3  17    1.95    0.87
   0  -3  17   -0.20    0.74
   0   3 -17    0.74    0.94
   0   3 -17    0.74    0.67
   0  -3  16    5.25    0.47
   0  -3  16    7.60    0.81
   0   3 -16    5.79    0.67
   0   3 -16    4.84    0.54
   0  -3  16    6.46    1.01
   0  -3  16    6.46    0.94
   0   3 -16    6.26    1.08
   0   3 -16    7.60    0.94
   0  -3  15   83.03    3.43
   0  -3  15   80.21    3.10
   0   3 -15   86.06    3.50
   0   3 -15   87.61    3.43
   0  -3  14   32.03    1.61
   0  -3  14   35.60    1.55
   0   3 -14   33.91    1.55
   0   3 -14   32.77    1.68
   0  -3  14   32.70    1.61
   0  -3  14   34.18    1.48
   0   3 -14   33.64    1.75
   0   3 -14   36.20    1.61
   0  -3  13   15.01    1.01
   0  -3  13   14.67    0.81
   0   3 -13   14.40    0.87
   0   3 -13   14.53    1.01
   0  -3  13   13.73    1.08
   0  -3  13   15.14    1.01
   0   3 -13   14.60    1.01
   0   3 -13   14.13    1.14
   0  -3  12    2.89    0.54
   0  -3  12    1.21    0.34
   0   3 -12    1.82    0.54
   0   3 -12    1.14    0.34
   0  -3  12    2.42    0.54
   0  -3  12    1.88    0.67
   0   3 -12   -0.27    0.67
   0   3 -12    1.55    0.54
   0  -3  11    6.93    0.67
   0  -3  11    5.58    0.47
   0   3 -11    5.79    0.67
   0   3 -11    4.91    0.47
   0  -3  11    7.47    0.67
   0  -3  11    8.88    0.87
   0   3 -11    8.21    0.87
   0   3 -11    7.94    0.74
   0  -3  10  747.57   26.78
   0  -3  10  726.71   25.91
   0   3 -10  730.75   26.04
   0   3 -10  762.37   27.32
   0  -3  10  750.93   17.83
   0  -3  10  750.93   17.76
   0   3 -10  783.91   18.50
   0   3 -10  771.79   18.37
   0  -3   9   19.58    1.08
   0  -3   9   20.66    1.01
   0   3  -9   20.99    1.14
   0   3  -9   17.76    0.94
   0  -3   8  388.45   14.06
   0  -3   8  387.58   13.93
   0   3  -8  369.81   13.32
   0   3  -8  384.35   13.93
   0  -3   8  382.47    9.15
   0  -3   8  381.79    9.29
   0   3  -8  379.37    9.15
   0   3  -8  371.97    9.08
   0  -3   7  243.31    8.88
   0  -3   7  242.44    8.75
   0   3  -7  241.29    8.81
   0   3  -7  231.47    8.41
   0  -3   7  244.05    5.99
   0  -3   7  242.30    5.99
   0   3  -7  235.84    5.92
   0   3  -7  235.17    5.79
   0  -3   6   48.25    2.02
   0  -3   6   48.18    1.88
   0   3  -6   46.56    1.95
   0   3  -6   45.49    1.82
   0  -3   6   46.36    1.41
   0  -3   6   44.54    1.48
   0   3  -6   43.06    1.48
   0   3  -6   46.50    1.41
   0  -3   5  340.01   12.25
   0  -3   5  339.60   12.18
   0   3  -5  340.28   12.18
   0   3  -5  340.88   12.25
   0  -3   5  324.13    7.81
   0  -3   5  325.07    7.74
   0   3  -5  322.38    7.74
   0   3  -5  328.03    7.81
   0  -3   4  199.44    7.20
   0  -3   4  191.70    7.00
   0   3  -4  193.86    7.00
   0   3  -4  194.73    7.07
   0  -3   4  192.58    4.64
   0  -3   4  188.54    4.64
   0   3  -4  191.84    4.71
   0   3  -4  190.02    4.64
   0  -3   3 1629.04   57.67
   0  -3   3 1677.49   59.42
   0   3  -3 1619.62   57.40
   0   3  -3 1585.98   56.12
   0  -3   3 1622.99   37.48
   0  -3   3 1643.85   38.02
   0   3  -3 1614.24   37.28
   0   3  -3 1635.77   37.82
   0  -3   2   58.14    2.15
   0  -3   2   57.93    2.22
   0   3  -2   57.06    2.15
   0   3  -2   56.79    2.22
   0  -3   2   60.02    1.61
   0  -3   2   58.94    1.68
   0   3  -2   62.04    1.68
   0   3  -2   59.55    1.68
   0  -3   1  366.32   13.05
   0  -3   1  365.10   12.99
   0   3  -1  371.56   13.26
   0   3  -1  358.85   12.78
   0  -3   1  367.19    8.68
   0  -3   1  361.61    8.55
   0   3  -1  364.63    8.61
   0   3  -1  369.68    8.68
   0  -3   0  652.56   23.15
   0  -3   0  637.15   22.61
   0   3   0  616.69   21.87
   0   3   0  623.15   22.07
   0  -3   0  614.27   14.33
   0  -3   0  614.07   14.33
   0   3   0  627.39   14.67
   0   3   0  625.44   14.60
   0  -3  -1   81.82    2.96
   0  -3  -1   79.67    2.89
   0   3   1   81.15    2.96
   0   3   1   82.36    2.96
   0  -3  -1   76.98    2.09
   0  -3  -1   81.62    2.15
   0   3   1   82.16    2.15
   0   3   1   83.03    2.22
   0  -3  -2  657.74   23.28
   0  -3  -2  627.86   22.21
   0   3   2  650.27   23.01
   0   3   2  621.00   22.00
   0  -3  -2  622.28   14.60
   0  -3  -2  621.20   14.53
   0   3   2  624.77   14.60
   0   3   2  646.64   15.14
   0  -3  -3  400.90   14.20
   0  -3  -3  391.89   13.93
   0   3   3  390.61   13.86
   0   3   3  407.03   14.47
   0  -3  -3  401.37    9.55
   0  -3  -3  401.31    9.49
   0   3   3  412.21    9.76
   0   3   3  402.65    9.55
   0  -3  -4  407.36   14.47
   0  -3  -4  414.76   14.74
   0   3   4  420.42   14.94
   0   3   4  420.48   14.94
   0  -3  -4  426.94   10.16
   0  -3  -4  431.92   10.23
   0   3   4  424.39   10.09
   0   3   4  437.51   10.36
   0  -3  -5  154.36    5.58
   0  -3  -5  161.49    5.79
   0   3   5  159.74    5.79
   0   3   5  164.18    5.92
   0  -3  -5  155.77    3.97
   0  -3  -5  154.49    3.97
   0   3   5  161.09    4.10
   0   3   5  159.88    4.04
   0  -3  -6   90.70    3.36
   0  -3  -6   89.36    3.30
   0   3   6   86.87    3.16
   0   3   6   86.80    3.23
   0  -3  -6   97.84    2.69
   0  -3  -6  102.14    2.83
   0   3   6   99.59    2.76
   0   3   6   96.22    2.62
   0  -3  -7   23.08    1.01
   0  -3  -7   21.53    0.94
   0   3   7   22.07    0.94
   0   3   7   22.07    1.01
   0  -3  -7   21.94    1.01
   0  -3  -7   23.35    1.08
   0   3   7   23.48    1.08
   0   3   7   24.29    1.14
   0  -3  -8   93.93    3.50
   0  -3  -8   98.85    3.70
   0   3   8   97.30    3.63
   0   3   8   96.49    3.57
   0  -3  -8   90.30    2.62
   0  -3  -8   95.21    2.76
   0   3   8   94.67    2.69
   0   3   8   96.96    2.83
   0  -3  -9  321.57   11.57
   0  -3  -9  338.86   12.18
   0   3   9  327.63   11.84
   0   3   9  329.31   11.78
   0  -3  -9  328.57    8.07
   0  -3  -9  323.12    7.94
   0   3   9  332.47    8.14
   0   3   9  333.08    8.28
   0  -3 -10   47.24    1.88
   0  -3 -10   46.90    1.88
   0   3  10   50.26    1.95
   0   3  10   47.51    1.95
   0  -3 -10   45.08    1.68
   0  -3 -10   44.75    1.68
   0   3  10   47.24    1.82
   0   3  10   45.76    1.61
   0  -3 -11    9.02    0.87
   0  -3 -11   10.16    0.87
   0   3  11   10.30    0.87
   0   3  11    9.42    0.94
   0  -3 -12   35.73    1.55
   0  -3 -12   35.46    1.55
   0   3  12   33.91    1.41
   0   3  12   32.30    1.48
   0  -3 -12   32.97    1.48
   0   3  12   29.88    1.55
   0  -3 -13    2.09    0.47
   0  -3 -13    2.42    0.40
   0   3  13    2.29    0.54
   0   3  13    2.83    0.40
   0  -3 -13    2.69    0.74
   0   3  13    2.56    0.74
   0  -3 -14    2.09    0.47
   0  -3 -14    1.75    0.40
   0   3  14    1.61    0.54
   0   3  14    1.88    0.34
   0  -3 -14    2.15    0.74
   0  -3 -14    2.09    0.67
   0   3  14    2.09    0.67
   0   3  14    2.02    0.81
   0  -3 -15    7.81    0.67
   0  -3 -15    7.87    0.61
   0  -3 -15    8.68    1.01
   0  -3 -15    7.47    1.01
   0   3  15    7.47    0.87
   0   3  15    8.68    1.14
   0  -3 -16    9.62    0.74
   0  -3 -16    9.96    0.74
   0   3  16    8.88    0.81
   0   3  16    9.55    0.67
   0  -3 -16   10.70    1.08
   0  -3 -16    8.88    1.08
   0   3  16    9.55    1.21
   0   3  16    9.55    1.01
   0  -3 -17   12.38    0.87
   0  -3 -17   12.72    0.81
   0   3  17   14.13    0.81
   0   3  17   13.39    1.01
   0  -3 -17   11.44    1.21
   0  -3 -17   13.73    1.21
   0   3  17   12.38    1.08
   0   3  17   12.18    1.35
   0  -3 -18   25.37    1.35
   0  -3 -18   24.36    1.28
   0   3  18   22.74    1.41
   0   3  18   23.01    1.14
   0  -3 -18   23.08    1.48
   0  -3 -18   21.33    1.55
   0   3  18   20.59    1.68
   0   3  18   21.73    1.41
   0  -3 -19    2.76    0.54
   0   3  19    3.63    0.74
   0  -3 -19    5.11    1.01
   0  -3 -19    3.84    1.08
   0   3  19    3.90    1.14
   0   3  19    5.65    0.94
   0   3  20    7.87    0.67
   0   3  20    7.67    0.87
   0  -3 -20    7.00    1.21
   0  -3 -20    7.67    1.21
   0   3  20    9.22    1.14
   0   3  20    6.12    1.21
   0  -3 -21    0.34    0.54
   0  -3 -21    0.07    0.20
   0   3  21    1.01    0.40
   0   3  21    1.28    0.54
   0  -3 -21    1.28    1.01
   0  -3 -21   -0.20    0.94
   0   3  21    2.29    1.14
   0   3  21    2.09    0.87
   0  -3 -22    0.54    0.47
   0  -3 -22   -0.13    0.20
   0   3  22   -0.07    0.54
   0  -3 -22    0.27    0.94
   0  -3 -22    2.29    1.01
   0   3  22    0.61    1.14
   0   3  22    0.20    0.87
   0  -3 -23    0.13    0.27
   0  -3 -23    0.20    0.47
   0   3  23    1.28    0.61
   0   3  23    0.61    0.40
   0  -3 -23   -0.54    0.94
   0   3  24    8.41    0.74
   0   3  24    9.35    1.08
   0  -3 -24    8.88    1.41
   0  -3 -24    7.47    1.28
   0   3  24    4.31    1.41
   0   3  24    8.34    1.35
   0  -3 -25    0.20    1.01
   0  -3 -25    1.08    1.08
   0   3  25   -0.34    1.08
   0   3  25    0.94    1.08
   0  -4  23    0.40    0.87
   0  -4  23    0.34    0.94
   0  -4  22    3.90    0.67
   0  -4  22    3.70    0.54
   0   4 -22    4.04    0.54
   0  -4  22    2.96    1.01
   0  -4  22    3.03    1.01
   0   4 -22    5.65    1.21
   0   4 -22    3.30    0.81
   0  -4  21   10.16    0.74
   0  -4  21    9.42    0.94
   0   4 -21    9.89    0.81
   0   4 -21    9.42    0.94
   0  -4  21   10.23    1.35
   0  -4  21    9.35    1.21
   0   4 -21    8.75    1.35
   0   4 -21   10.56    1.08
   0  -4  20   11.44    1.01
   0  -4  20   11.04    0.74
   0   4 -20   12.04    0.87
   0   4 -20   11.44    1.01
   0  -4  20   10.09    1.35
   0  -4  20   10.77    1.21
   0   4 -20   11.64    1.14
   0   4 -20   10.90    1.48
   0  -4  19    2.96    0.67
   0  -4  19    3.30    0.47
   0   4 -19    2.02    0.61
   0   4 -19    3.30    0.54
   0  -4  19    3.43    1.01
   0  -4  19    2.42    0.94
   0   4 -19    2.83    1.14
   0   4 -19    3.03    0.74
   0  -4  18   48.58    2.29
   0  -4  18   49.25    2.09
   0   4 -18   50.80    2.36
   0   4 -18   50.33    2.22
   0  -4  18   46.36    2.15
   0  -4  18   46.23    2.29
   0  -4  17   22.27    1.14
   0   4 -17   24.49    1.48
   0  -4  17   23.08    1.61
   0  -4  17   26.38    1.55
   0   4 -17   23.08    1.68
   0   4 -17   24.43    1.41
   0  -4  16   65.27    2.62
   0  -4  16   71.19    3.03
   0   4 -16   75.97    3.23
   0   4 -16   71.73    2.96
   0  -4  16   67.49    2.62
   0  -4  16   69.04    2.49
   0  -4  15    4.17    0.61
   0  -4  15    4.44    0.47
   0   4 -15    4.24    0.67
   0   4 -15    4.84    0.54
   0   4 -15    1.95    1.01
   0  -4  14   15.95    1.08
   0  -4  14   14.74    0.81
   0   4 -14   15.68    0.94
   0   4 -14   16.01    1.14
   0  -4  14   15.88    1.08
   0  -4  14   16.15    1.21
   0   4 -14   15.07    1.01
   0  -4  13  126.70    4.91
   0  -4  13  114.79    4.31
   0   4 -13  121.79    4.64
   0   4 -13  128.12    4.98
   0  -4  13  131.55    3.70
   0  -4  13  120.45    3.57
   0   4 -13  123.00    3.77
   0   4 -13  128.99    3.70
   0  -4  12   28.73    1.48
   0  -4  12   29.14    1.28
   0   4 -12   30.35    1.55
   0   4 -12   29.67    1.35
   0  -4  12   29.47    1.28
   0  -4  12   29.74    1.41
   0   4 -12   27.52    1.48
   0   4 -12   30.62    1.35
   0  -4  11  105.51    4.17
   0  -4  11   98.51    3.77
   0   4 -11  103.49    4.10
   0   4 -11  105.78    4.04
   0  -4  11   96.15    2.83
   0  -4  10    4.84    0.61
   0  -4  10    5.65    0.47
   0   4 -10    4.84    0.47
   0   4 -10    5.32    0.67
   0  -4  10    3.36    0.61
   0  -4  10    4.44    0.61
   0   4 -10    4.58    0.74
   0   4 -10    3.90    0.54
   0  -4   9    4.84    0.61
   0  -4   9    3.90    0.40
   0   4  -9    4.51    0.47
   0   4  -9    3.43    0.54
   0  -4   9    2.62    0.54
   0  -4   9    3.50    0.61
   0   4  -9    3.43    0.54
   0   4  -9    3.57    0.67
   0  -4   8   20.86    0.94
   0  -4   8   22.68    1.08
   0  -4   7  459.51   16.42
   0  -4   7  431.59   15.54
   0   4  -7  447.94   16.15
   0   4  -7  430.11   15.41
   0  -4   7  454.13   10.90
   0  -4   7  459.31   10.90
   0   4  -7  455.00   10.97
   0   4  -7  448.74   10.70
   0  -4   6   20.59    0.94
   0  -4   6   20.39    1.08
   0   4  -6   18.71    1.01
   0   4  -6   19.11    0.94
   0  -4   6   18.64    0.94
   0  -4   6   18.77    0.81
   0   4  -6   17.97    0.94
   0   4  -6   18.30    0.81
   0  -4   5  221.18    8.01
   0  -4   5  234.70    8.55
   0   4  -5  213.10    7.74
   0   4  -5  221.71    8.07
   0  -4   5  226.69    5.58
   0  -4   5  229.12    5.58
   0   4  -5  227.37    5.65
   0   4  -5  225.21    5.52
   0  -4   4   45.82    1.88
   0   4  -4   44.28    1.82
   0   4  -4   40.98    1.61
   0  -4   4   50.53    1.55
   0  -4   4   50.87    1.48
   0   4  -4   48.72    1.48
   0   4  -4   50.06    1.61
   0   4  -3   50.94    1.95
   0   4  -3   53.02    2.15
   0  -4   3   55.18    1.55
   0  -4   3   57.93    1.68
   0   4  -3   54.91    1.55
   0   4  -3   55.98    1.68
   0  -4   2 2950.58  104.30
   0  -4   2 2927.70  103.56
   0   4  -2 3050.17  107.80
   0   4  -2 2888.67  102.21
   0  -4   2 2902.13   66.95
   0  -4   2 2929.72   67.49
   0   4  -2 2918.28   67.29
   0   4  -2 2974.80   68.57
   0  -4   1 1810.72   64.06
   0  -4   1 1810.72   64.06
   0   4  -1 1822.16   64.46
   0   4  -1 1803.99   63.86
   0  -4   1 1824.18   42.12
   0  -4   1 1816.10   41.99
   0   4  -1 1835.62   42.46
   0   4  -1 1841.67   42.53
   0  -4   0  112.77    4.10
   0  -4   0  114.59    4.17
   0   4   0  117.48    4.31
   0   4   0  110.08    3.97
   0  -4   0  112.51    2.89
   0  -4   0  111.97    2.89
   0   4   0  102.21    2.69
   0   4   0  108.13    2.83
   0  -4  -1    5.38    0.34
   0  -4  -1    5.65    0.40
   0   4   1    6.12    0.40
   0   4   1    5.58    0.40
   0  -4  -1    4.58    0.61
   0  -4  -1    5.32    0.54
   0   4   1    5.05    0.61
   0   4   1    5.05    0.61
   0  -4  -2  450.09   16.01
   0  -4  -2  442.08   15.68
   0   4   2  434.08   15.41
   0   4   2  447.80   15.95
   0  -4  -2  462.07   10.97
   0  -4  -2  461.73   10.97
   0   4   2  469.87   11.17
   0   4   2  452.78   10.70
   0  -4  -3 2077.85   73.48
   0  -4  -3 2139.09   75.63
   0   4   3 2082.56   73.61
   0   4   3 2085.26   73.75
   0  -4  -3 2161.29   49.99
   0  -4  -3 2130.34   49.25
   0   4   3 2136.39   49.39
   0   4   3 2149.18   49.66
   0  -4  -4 2200.99   77.78
   0  -4  -4 2230.60   78.86
   0   4   4 2198.97   77.78
   0   4   4 2200.99   77.85
   0  -4  -4 2303.94   53.29
   0  -4  -4 2288.47   52.89
   0   4   4 2359.12   54.57
   0   4   4 2277.70   52.69
   0  -4  -5   81.75    3.03
   0  -4  -5   79.20    2.89
   0   4   5   78.93    2.89
   0   4   5   79.20    2.96
   0  -4  -5   77.18    2.22
   0  -4  -5   76.98    2.22
   0   4   5   76.24    2.22
   0   4   5   78.66    2.29
   0  -4  -6  221.58    7.94
   0  -4  -6  226.22    8.14
   0   4   6  215.05    7.74
   0   4   6  215.66    7.74
   0  -4  -6  229.79    5.72
   0  -4  -6  226.63    5.65
   0   4   6  229.25    5.79
   0   4   6  226.56    5.72
   0  -4  -7  326.21   11.64
   0  -4  -7  352.12   12.58
   0   4   7  339.60   12.18
   0   4   7  335.77   11.98
   0  -4  -7  365.17    8.88
   0  -4  -7  363.29    8.88
   0   4   7  371.16    9.02
   0   4   7  363.36    8.88
   0  -4  -8   58.68    2.29
   0  -4  -8   59.89    2.29
   0   4   8   56.52    2.22
   0   4   8   59.42    2.22
   0  -4  -8   57.40    1.88
   0  -4  -8   59.28    1.95
   0   4   8   59.35    1.95
   0   4   8   58.20    1.95
   0  -4  -9   26.78    1.21
   0  -4  -9   26.92    1.14
   0   4   9   26.24    1.14
   0   4   9   25.30    1.21
   0  -4  -9   30.89    1.35
   0  -4  -9   31.22    1.35
   0   4   9   26.65    1.35
   0   4   9   29.88    1.35
   0   4  10   13.39    0.67
   0   4  10   11.91    0.74
   0  -4 -10   11.37    0.94
   0  -4 -10   11.30    0.94
   0   4  10   14.80    1.08
   0   4  10   11.51    0.87
   0  -4 -11   98.31    3.77
   0  -4 -11   95.41    2.89
   0   4  11   97.43    3.03
   0  -4 -12   48.72    2.02
   0  -4 -12   48.78    2.02
   0   4  12   47.44    2.02
   0   4  12   50.67    2.02
   0  -4 -12   42.46    1.82
   0  -4 -13   12.85    0.81
   0  -4 -13   12.92    0.74
   0   4  13   13.39    0.74
   0   4  13   13.19    0.87
   0  -4 -13   11.57    1.01
   0  -4 -13   12.92    1.08
   0   4  13   10.97    1.08
   0   4  13   10.63    0.94
   0  -4 -14   11.57    0.74
   0  -4 -14   12.78    0.81
   0   4  14   10.09    0.81
   0   4  14   11.44    0.67
   0  -4 -14    8.48    1.01
   0   4  14   11.51    1.01
   0   4  14   10.16    1.08
   0  -4 -15   85.93    3.36
   0  -4 -15   84.65    3.30
   0   4  15   84.38    3.43
   0   4  15   83.64    3.23
   0  -4 -15   85.05    2.89
   0  -4 -15   83.77    2.89
   0   4  15   84.58    2.76
   0   4  15   81.75    2.96
   0   4  16    0.94    0.47
   0   4  16    1.08    0.34
   0  -4 -16    0.34    0.74
   0  -4 -16    1.35    0.81
   0   4  17   19.18    1.21
   0   4  17   17.70    0.94
   0  -4 -17   18.24    1.41
   0  -4 -17   20.46    1.41
   0   4  17   17.97    1.35
   0   4  17   17.76    1.55
   0   4  18    2.56    0.40
   0   4  18    3.50    0.67
   0  -4 -18    4.51    1.01
   0  -4 -18    3.57    0.94
   0   4  18    3.43    0.87
   0   4  18    3.63    1.08
   0   4  19   28.60    1.61
   0  -4 -19   25.57    1.82
   0  -4 -19   26.71    1.68
   0   4  19   26.11    1.88
   0   4  19   27.05    1.61
   0   4  20    3.03    0.74
   0   4  20    1.75    0.40
   0  -4 -20    2.62    0.94
   0  -4 -20    2.96    1.01
   0   4  20    2.36    1.21
   0   4  20    2.42    0.94
   0   4  21    9.62    0.94
   0   4  21   10.03    0.74
   0  -4 -21   10.43    1.35
   0  -4 -21    8.81    1.35
   0   4  21    8.01    1.41
   0   4  21    9.15    1.28
   0  -4 -22   -0.13    0.20
   0  -4 -22    0.13    0.47
   0   4  22    0.61    0.40
   0  -4 -22    1.35    1.01
   0   4  22   -0.34    0.87
   0   4  22    1.82    1.21
   0  -4 -23    0.27    0.47
   0  -4 -23    0.13    0.20
   0   4  23    0.54    0.40
   0   4  23    0.87    0.61
   0  -4 -23    0.54    1.01
   0   4  23   -1.21    1.01
   0   4  23    0.94    1.21
   0  -4 -24    0.00    0.27
   0  -4 -24   -0.07    0.47
   0   4  24    0.61    0.67
   0   4  24   -0.20    0.47
   0  -4 -24   -0.20    1.01
   0  -4 -24    0.74    1.01
   0   4  24    1.21    1.01
   0   4  24    1.28    1.08
   0  -4 -25    0.94    1.08
   0  -4 -25    0.74    1.14
   0   4  25    1.01    1.08
   0   4  25   -0.61    1.08
   0  -5  22    2.76    1.01
   0  -5  22    0.94    0.94
   0  -5  21    3.77    0.54
   0  -5  21    3.23    0.67
   0   5 -21    2.83    0.67
   0   5 -21    3.36    0.54
   0  -5  21    4.91    1.08
   0  -5  21    3.97    1.01
   0   5 -21    3.63    0.81
   0   5 -21    2.69    1.08
   0  -5  20    0.34    0.34
   0  -5  20    0.34    0.54
   0   5 -20    0.34    0.40
   0   5 -20    0.07    0.54
   0  -5  20   -0.47    0.81
   0  -5  20    1.35    0.87
   0   5 -20   -0.07    0.67
   0   5 -20    1.41    1.01
   0  -5  19   18.84    1.01
   0   5 -19   20.25    1.35
   0   5 -19   21.53    1.28
   0  -5  19   20.66    1.61
   0  -5  19   23.48    1.75
   0   5 -19   20.46    1.35
   0   5 -19   21.94    1.88
   0  -5  18   29.14    1.68
   0  -5  18   29.14    1.35
   0   5 -18   33.85    1.61
   0   5 -18   29.20    1.68
   0  -5  18   31.69    1.82
   0  -5  18   30.95    1.88
   0   5 -18   29.34    1.61
   0   5 -18   28.40    1.95
   0  -5  17    7.47    0.61
   0  -5  17    7.47    0.81
   0   5 -17    8.81    0.74
   0   5 -17    7.81    0.87
   0  -5  17    7.20    0.94
   0  -5  17    7.87    1.08
   0   5 -17    8.28    0.94
   0   5 -17    9.02    1.28
   0  -5  16   14.80    1.14
   0  -5  16   13.59    1.21
   0   5 -16   12.99    1.41
   0   5 -16   16.08    1.14
   0  -5  15   11.91    0.74
   0  -5  15   12.45    0.94
   0   5 -15   12.52    1.01
   0   5 -15   10.77    0.81
   0  -5  15    9.15    1.01
   0   5 -15   11.78    1.28
   0  -5  14   28.06    1.28
   0  -5  14   29.54    1.55
   0   5 -14   31.36    1.48
   0   5 -14   27.92    1.55
   0   5 -14   29.40    1.48
   0  -5  13    6.80    0.74
   0  -5  13    6.80    0.54
   0   5 -13    7.47    0.81
   0   5 -13    6.73    0.61
   0   5 -13    8.14    0.81
   0   5 -13    8.21    1.01
   0  -5  12   25.03    1.21
   0   5 -12   25.43    1.21
   0   5 -12   25.97    1.48
   0  -5  12   25.70    1.21
   0  -5  12   24.09    1.35
   0   5 -12   24.43    1.21
   0   5 -12   23.08    1.41
   0  -5  11   23.89    1.14
   0  -5  11   23.42    1.28
   0   5 -11   22.61    1.28
   0   5 -11   24.69    1.21
   0  -5  11   25.50    1.14
   0  -5  11   23.15    1.21
   0   5 -11   23.75    1.14
   0   5 -11   21.40    1.28
   0  -5  10  272.38    9.89
   0  -5  10  285.44   10.50
   0   5 -10  291.16   10.70
   0   5 -10  270.30    9.82
   0  -5  10  272.92    7.00
   0   5 -10  295.60    7.33
   0   5 -10  284.02    7.27
   0  -5   9   52.08    2.09
   0  -5   9   50.20    2.22
   0   5  -9   48.72    2.15
   0   5  -9   49.59    2.02
   0  -5   9   49.79    1.75
   0  -5   9   51.61    1.68
   0   5  -9   49.12    1.82
   0   5  -9   49.66    1.61
   0  -5   8  776.50   27.79
   0  -5   8  766.41   27.32
   0   5  -8  760.35   27.12
   0   5  -8  737.48   26.44
   0  -5   8  779.20   18.37
   0  -5   8  752.95   17.83
   0   5  -8  731.42   17.43
   0   5  -8  741.51   17.49
   0  -5   7    1.41    0.47
   0  -5   7    1.61    0.61
   0   5  -7    1.28    0.61
   0   5  -7    1.48    0.47
   0  -5   6   70.45    2.83
   0  -5   6   64.26    2.49
   0   5  -6   59.62    2.36
   0   5  -6   65.67    2.69
   0  -5   6   69.78    2.02
   0  -5   6   69.98    2.15
   0   5  -6   68.30    2.15
   0   5  -6   66.82    1.95
   0  -5   5    1.21    0.47
   0  -5   5    1.41    0.34
   0   5  -5    0.94    0.27
   0   5  -5    1.28    0.40
   0  -5   5    0.34    0.40
   0  -5   5    1.68    0.54
   0   5  -5    0.61    0.54
   0   5  -5    0.87    0.40
   0  -5   4  356.22   12.78
   0  -5   4  348.15   12.58
   0   5  -4  348.55   12.52
   0  -5   4  351.04    8.41
   0  -5   4  337.92    8.21
   0   5  -4  337.52    8.21
   0   5  -4  346.94    8.34
   0  -5   3  121.59    4.51
   0  -5   3  122.13    4.58
   0   5  -3  121.66    4.58
   0   5  -3  122.94    4.51
   0  -5   3  117.75    3.16
   0  -5   3  127.98    3.30
   0   5  -3  121.39    3.23
   0   5  -3  119.44    3.10
   0  -5   2  607.68   21.67
   0  -5   2  611.38   21.73
   0   5  -2  616.22   21.94
   0   5  -2  603.30   21.53
   0  -5   2  622.08   14.67
   0  -5   2  619.66   14.60
   0   5  -2  637.02   15.07
   0   5  -2  622.15   14.60
   0  -5   1  127.17    4.64
   0  -5   1  133.84    4.91
   0   5  -1  128.25    4.71
   0   5  -1  135.11    4.91
   0  -5   1  123.07    3.23
   0  -5   1  127.44    3.30
   0   5  -1  124.35    3.30
   0   5  -1  122.06    3.16
   0  -5   0  944.05   33.51
   0  -5   0  957.51   33.91
   0   5   0  976.35   34.65
   0   5   0  956.84   33.91
   0  -5   0  959.53   22.41
   0  -5   0  970.97   22.61
   0   5   0  986.44   23.08
   0   5   0  951.45   22.21
   0  -5  -1  422.64   15.07
   0  -5  -1  420.28   14.94
   0   5   1  421.56   15.01
   0   5   1  414.23   14.74
   0  -5  -1  410.26    9.82
   0  -5  -1  421.90   10.09
   0   5   1  412.41    9.89
   0   5   1  411.87    9.82
   0  -5  -2  802.75   28.46
   0  -5  -2  793.33   28.13
   0   5   2  767.08   27.18
   0   5   2  794.67   28.19
   0  -5  -2  784.58   18.44
   0  -5  -2  756.99   17.76
   0   5   2  784.58   18.44
   0   5   2  786.60   18.44
   0  -5  -3  204.29    7.33
   0  -5  -3  207.92    7.47
   0   5   3  205.83    7.40
   0   5   3  198.77    7.13
   0  -5  -3  218.48    5.52
   0  -5  -3  221.85    5.52
   0   5   3  212.23    5.32
   0   5   3  223.26    5.58
   0  -5  -4    7.00    0.47
   0  -5  -4    6.73    0.40
   0   5   4    7.54    0.47
   0   5   4    7.13    0.47
   0  -5  -4    8.95    0.81
   0  -5  -4    9.08    0.74
   0   5   4    8.81    0.81
   0   5   4    8.14    0.74
   0  -5  -5    4.98    0.40
   0  -5  -5    5.25    0.40
   0   5   5    4.91    0.40
   0   5   5    5.72    0.40
   0  -5  -5    6.46    0.74
   0  -5  -5    6.26    0.74
   0   5   5    5.92    0.74
   0   5   5    5.79    0.67
   0  -5  -6   20.72    0.87
   0  -5  -6   21.20    0.94
   0   5   6   20.66    0.94
   0   5   6   20.19    0.87
   0  -5  -6   19.65    1.08
   0  -5  -6   21.53    1.08
   0   5   6   22.00    1.08
   0   5   6   20.39    1.08
   0  -5  -7   49.12    1.88
   0  -5  -7   45.76    1.75
   0   5   7   45.02    1.75
   0   5   7   45.62    1.82
   0  -5  -7   40.37    1.55
   0  -5  -7   41.58    1.55
   0   5   7   40.91    1.55
   0   5   7   40.57    1.55
   0  -5  -8  131.88    4.84
   0  -5  -8  131.88    4.84
   0   5   8  129.26    4.71
   0   5   8  128.45    4.78
   0  -5  -8  129.53    3.63
   0  -5  -8  133.43    3.70
   0   5   8  131.48    3.63
   0   5   8  130.61    3.63
   0   5   9   81.55    3.03
   0   5   9   81.22    3.10
   0  -5  -9   80.68    2.56
   0  -5  -9   81.69    2.56
   0   5   9   82.83    2.56
   0   5   9   80.75    2.56
   0  -5 -10  102.08    3.84
   0   5  10   99.99    3.84
   0  -5 -10   88.42    2.76
   0   5  10   90.84    2.89
   0  -5 -11    7.20    0.54
   0  -5 -11    7.13    0.67
   0   5  11    6.19    0.67
   0   5  11    7.81    0.54
   0  -5 -11    8.81    0.94
   0   5  11    6.86    0.87
   0  -5 -12  169.36    6.26
   0  -5 -12  160.82    5.92
   0   5  12  160.28    5.85
   0   5  12  162.77    6.06
   0  -5 -12  163.78    4.51
   0  -5 -12  166.34    4.64
   0   5  12  162.64    4.51
   0   5  12  170.44    4.78
   0   5  13    5.58    0.47
   0   5  13    5.52    0.61
   0  -5 -13    6.12    0.87
   0  -5 -13    7.67    0.94
   0   5  13    6.59    0.87
   0   5  13    4.98    0.87
   0   5  14  138.61    5.11
   0   5  14  143.53    5.45
   0  -5 -14  152.81    4.44
   0  -5 -14  145.34    4.24
   0   5  14  148.03    4.24
   0   5  14  152.14    4.51
   0   5  15   46.97    1.88
   0   5  15   49.52    2.22
   0  -5 -15   45.35    2.09
   0  -5 -15   48.85    2.09
   0   5  15   47.44    2.02
   0   5  15   45.62    2.15
   0  -5 -16    0.67    0.47
   0  -5 -16   -0.07    0.20
   0   5  16    0.20    0.47
   0   5  16    0.20    0.34
   0  -5 -16    1.68    0.81
   0  -5 -16    0.54    0.81
   0   5  16    1.28    0.81
   0   5  16    2.09    0.94
   0   5  17   11.71    0.74
   0   5  17   10.70    0.94
   0  -5 -17   10.83    1.21
   0  -5 -17   10.03    1.14
   0   5  17   13.26    1.28
   0   5  17   10.50    1.41
   0  -5 -18   28.80    1.55
   0   5  18   33.17    1.48
   0   5  18   32.84    1.75
   0  -5 -18   29.07    1.88
   0  -5 -18   30.68    1.82
   0   5  18   32.03    1.75
   0   5  18   29.88    2.02
   0   5  19   15.14    1.28
   0  -5 -19   18.37    1.55
   0  -5 -19   19.11    1.41
   0   5  19   17.02    1.41
   0   5  19   17.70    1.61
   0   5  20    5.38    0.54
   0   5  20    4.58    0.74
   0  -5 -20    5.38    1.14
   0  -5 -20    5.72    1.08
   0   5  20    5.11    1.01
   0   5  20    4.10    1.28
   0   5  21   18.10    1.28
   0  -5 -22   -0.34    0.47
   0  -5 -22    0.20    0.27
   0   5  22    0.47    0.67
   0   5  22    0.74    0.40
   0  -5 -22    0.20    0.94
   0   5  23    2.22    0.74
   0   5  23    1.82    0.47
   0  -5 -23    1.68    1.08
   0  -5 -23    1.28    1.01
   0   5  23    0.74    0.94
   0   5  23    0.20    1.08
   0  -5 -24    1.48    0.54
   0  -5 -24    0.00    0.27
   0   5  24    2.42    0.54
   0   5  24    1.35    0.74
   0  -5 -24    0.07    1.01
   0  -5 -24    2.56    1.14
   0   5  24    2.02    1.08
   0   5  24    2.69    1.14
   0  -5 -25   -0.40    1.08
   0  -5 -25    1.61    1.08
   0   5  25    2.02    1.14
   0   5  25   -1.28    1.08
   0  -6  22    2.36    1.01
   0  -6  22   -0.74    0.81
   0  -6  21    2.83    0.81
   0   6 -21    2.76    0.54
   0  -6  21    3.90    1.01
   0  -6  21    4.58    1.01
   0   6 -21    3.30    1.14
   0   6 -21    4.78    0.81
   0  -6  20    0.67    0.34
   0  -6  20    0.81    0.61
   0   6 -20    0.54    0.40
   0   6 -20    0.00    0.54
   0  -6  20    0.94    0.81
   0  -6  20    0.74    0.81
   0   6 -20   -0.27    0.61
   0   6 -20    0.61    1.08
   0  -6  19   14.13    0.87
   0  -6  19   15.14    1.21
   0   6 -19   15.34    1.01
   0   6 -19   15.95    1.21
   0  -6  19   13.32    1.35
   0  -6  19   16.08    1.41
   0  -6  18    0.20    0.61
   0  -6  18    0.67    0.34
   0   6 -18    0.87    0.40
   0   6 -18   -0.07    0.61
   0  -6  18   -0.20    0.74
   0  -6  18   -0.61    0.87
   0   6 -18   -0.13    0.54
   0   6 -18    0.47    1.01
   0  -6  17   12.45    0.81
   0  -6  17   13.46    1.08
   0   6 -17   11.57    0.81
   0   6 -17   12.92    1.08
   0  -6  17   12.18    1.14
   0  -6  17   12.38    1.28
   0   6 -17   11.64    1.41
   0   6 -17   10.36    1.01
   0  -6  16    3.97    0.47
   0  -6  16    3.97    0.74
   0   6 -16    3.90    0.74
   0   6 -16    3.16    0.47
   0  -6  16    2.36    0.74
   0  -6  16    2.83    0.87
   0   6 -16    3.23    0.67
   0   6 -16    4.58    1.14
   0  -6  15   21.33    1.41
   0   6 -15   21.33    1.14
   0  -6  15   21.26    1.28
   0  -6  15   24.16    1.55
   0   6 -15   20.86    1.61
   0   6 -15   20.59    1.21
   0  -6  14    1.01    0.34
   0  -6  14    1.48    0.61
   0   6 -14    1.61    0.61
   0   6 -14    0.40    0.34
   0   6 -14    0.61    0.87
   0  -6  13    0.47    0.34
   0  -6  13    1.14    0.54
   0   6 -13    0.74    0.34
   0   6 -13    0.74    0.54
   0  -6  13    1.61    0.74
   0   6 -13    1.14    0.54
   0  -6  12   13.12    0.81
   0  -6  12   14.74    1.08
   0   6 -12   13.59    1.08
   0   6 -12   12.85    0.81
   0  -6  12   12.78    1.01
   0  -6  12   13.59    0.94
   0   6 -12   13.26    0.87
   0   6 -12   13.86    1.14
   0  -6  11    0.54    0.34
   0  -6  11    0.47    0.47
   0   6 -11    0.07    0.27
   0   6 -11    0.13    0.47
   0  -6  11    0.61    0.40
   0  -6  11   -0.54    0.54
   0   6 -11    0.87    0.47
   0   6 -11    0.47    0.67
   0  -6  10   60.90    2.42
   0  -6  10   62.58    2.69
   0   6 -10   64.19    2.76
   0   6 -10   63.99    2.56
   0  -6  10   60.42    1.95
   0  -6  10   61.97    2.09
   0   6 -10   58.41    2.15
   0   6 -10   61.10    1.95
   0  -6   9   86.73    3.36
   0  -6   9   90.64    3.63
   0   6  -9   89.09    3.43
   0   6  -9   87.54    3.57
   0  -6   9   90.64    2.62
   0  -6   9   88.21    2.69
   0   6  -9   87.14    2.56
   0   6  -9   87.95    2.76
   0  -6   8    3.84    0.47
   0  -6   8    4.10    0.61
   0   6  -8    3.57    0.40
   0   6  -8    3.70    0.61
   0  -6   8    4.58    0.54
   0  -6   8    5.38    0.67
   0   6  -8    3.50    0.67
   0   6  -8    4.10    0.54
   0  -6   7  288.53   10.56
   0  -6   7  281.67   10.23
   0   6  -7  284.29   10.43
   0   6  -7  280.52   10.16
   0  -6   7  282.88    7.00
   0  -6   7  273.59    6.86
   0  -6   6   31.83    1.35
   0  -6   6   33.64    1.28
   0   6  -6   33.44    1.28
   0   6  -6   29.94    1.35
   0  -6   5   30.01    1.35
   0  -6   5   31.49    1.48
   0   6  -5   32.10    1.41
   0   6  -5   29.94    1.41
   0  -6   5   30.01    1.14
   0  -6   5   27.72    1.21
   0   6  -5   29.00    1.14
   0   6  -5   26.92    1.21
   0  -6   4    1.35    0.47
   0  -6   4    1.61    0.34
   0   6  -4    1.14    0.34
   0   6  -4    0.54    0.47
   0  -6   4    1.68    0.61
   0  -6   4    2.56    0.47
   0   6  -4    1.61    0.47
   0   6  -4    1.21    0.61
   0  -6   3  107.59    4.04
   0  -6   3   96.76    3.70
   0   6  -3  101.20    3.90
   0   6  -3   99.25    3.70
   0  -6   3  102.48    2.89
   0  -6   3  102.14    2.76
   0   6  -3   99.92    2.83
   0   6  -3  104.36    2.83
   0  -6   2  417.25   14.94
   0  -6   2  420.42   15.07
   0   6  -2  411.26   14.80
   0   6  -2  431.52   15.41
   0  -6   2  417.19   10.03
   0  -6   2  416.45    9.96
   0   6  -2  405.14    9.69
   0   6  -2  420.75   10.16
   0  -6   1   74.76    2.83
   0  -6   1   77.99    2.96
   0   6  -1   83.03    3.10
   0   6  -1   79.87    3.10
   0  -6   1   87.34    2.49
   0  -6   1   81.35    2.29
   0   6  -1   82.02    2.29
   0   6  -1   88.82    2.56
   0  -6   0   26.58    1.14
   0  -6   0   27.32    1.21
   0   6   0   28.73    1.28
   0   6   0   27.99    1.14
   0   6   0   26.71    1.21
   0   6   0   28.87    1.14
   0  -6  -1  195.54    7.07
   0  -6  -1  203.61    7.33
   0   6   1  207.79    7.47
   0   6   1  202.60    7.33
   0  -6  -1  199.51    5.11
   0  -6  -1  200.85    5.05
   0   6   1  199.64    5.05
   0   6   1  209.33    5.32
   0  -6  -2  251.72    9.02
   0  -6  -2  246.41    8.81
   0   6   2  252.40    9.02
   0   6   2  248.83    8.95
   0  -6  -2  239.75    6.06
   0  -6  -2  241.16    5.99
   0   6   2  245.26    6.06
   0   6   2  252.60    6.33
   0  -6  -3  739.50   26.24
   0  -6  -3  785.25   27.86
   0   6   3  771.79   27.39
   0   6   3  763.05   27.05
   0  -6  -3  731.42   17.29
   0  -6  -3  775.16   18.30
   0   6   3  747.57   17.63
   0   6   3  768.43   18.17
   0  -6  -4   68.30    2.56
   0  -6  -4   68.57    2.56
   0   6   4   70.38    2.62
   0   6   4   69.58    2.56
   0  -6  -4   64.60    2.09
   0  -6  -4   70.59    2.15
   0   6   4   71.59    2.15
   0   6   4   69.84    2.22
   0  -6  -5  333.88   11.91
   0  -6  -5  345.39   12.31
   0   6   5  338.32   12.04
   0   6   5  327.76   11.71
   0  -6  -5  333.95    8.21
   0  -6  -5  335.16    8.21
   0   6   5  348.22    8.61
   0   6   5  341.49    8.41
   0  -6  -6   11.98    0.61
   0  -6  -6   11.98    0.61
   0  -6  -6   12.25    0.94
   0  -6  -6   10.56    0.87
   0   6   6   12.85    0.94
   0   6   6   12.85    1.01
   0  -6  -7  124.08    4.51
   0  -6  -7  126.64    4.64
   0   6   7  123.41    4.51
   0   6   7  127.85    4.71
   0  -6  -7  128.59    3.57
   0  -6  -7  123.41    3.43
   0   6   7  125.29    3.50
   0   6   7  123.81    3.50
   0  -6  -8    1.55    0.34
   0  -6  -8    1.28    0.34
   0   6   8    1.14    0.34
   0   6   8    0.74    0.40
   0  -6  -8    1.21    0.67
   0  -6  -8   -0.20    0.61
   0   6   8    0.94    0.67
   0   6   8   -0.40    0.61
   0  -6  -9   19.78    0.94
   0  -6  -9   21.46    1.01
   0   6   9   21.13    1.08
   0   6   9   20.19    0.94
   0  -6 -10  132.22    3.84
   0  -6 -10  128.12    3.63
   0   6  10  122.87    3.50
   0   6  10  119.10    3.57
   0  -6 -11   41.11    1.75
   0  -6 -11   40.51    1.68
   0   6  11   41.92    1.68
   0   6  11   38.49    1.75
   0  -6 -11   36.40    1.68
   0  -6 -11   40.91    1.75
   0   6  12   12.18    0.87
   0   6  12   11.10    0.67
   0  -6 -12   13.86    1.14
   0  -6 -12   14.60    1.08
   0   6  12   12.45    1.21
   0   6  12   13.59    1.08
   0   6  13   10.30    0.61
   0   6  13    9.42    0.74
   0  -6 -13   10.30    1.01
   0  -6 -13    9.15    1.01
   0   6  13    9.76    1.08
   0   6  13   10.09    1.01
   0   6  14    2.02    0.40
   0   6  14    3.36    0.61
   0  -6 -14    2.36    0.81
   0  -6 -14    3.97    0.81
   0   6  14    4.10    0.94
   0   6  14    2.62    0.81
   0   6  15   28.33    1.28
   0   6  15   27.72    1.48
   0   6  15   25.10    1.61
   0   6  15   28.53    1.55
   0   6  16   18.37    0.94
   0   6  16   18.64    1.14
   0  -6 -16   15.68    1.41
   0  -6 -16   20.19    1.41
   0   6  16   18.30    1.55
   0   6  16   18.24    1.35
   0  -6 -17   29.34    1.41
   0   6  17   29.07    1.55
   0   6  17   31.22    1.41
   0  -6 -17   26.98    1.82
   0  -6 -17   29.07    1.68
   0   6  18   16.75    1.21
   0   6  18   16.62    0.94
   0  -6 -18   18.71    1.41
   0  -6 -18   14.87    1.48
   0   6  18   18.03    1.75
   0   6  18   19.24    1.41
   0  -6 -19   11.71    1.35
   0  -6 -19   11.71    1.21
   0   6  19   10.83    1.21
   0   6  19    9.55    1.41
   0   6  20   19.31    1.08
   0   6  20   21.80    1.41
   0  -6 -20   19.11    1.68
   0  -6 -20   20.19    1.55
   0   6  20   18.24    1.75
   0   6  20   20.59    1.61
   0   6  21    0.61    0.40
   0   6  22    5.85    0.61
   0   6  22    5.65    0.87
   0  -6 -22    4.91    1.21
   0  -6 -22    4.91    1.08
   0   6  22    7.20    1.21
   0   6  22    5.32    1.41
   0  -6 -23    0.00    0.20
   0  -6 -23    0.81    0.47
   0   6  23    0.81    0.61
   0   6  23    0.34    0.40
   0  -6 -23    0.27    1.01
   0  -6 -23    0.47    1.01
   0   6  23    0.74    0.94
   0   6  23    1.48    1.08
   0   6  24    2.22    0.54
   0   6  24    3.36    0.81
   0  -6 -24    0.20    1.08
   0  -6 -24    1.95    1.14
   0   6  24    2.22    1.14
   0   6  24    3.97    1.14
   0  -6 -25   -1.35    1.08
   0  -6 -25    0.81    1.08
   0   6  25    0.67    1.14
   0   6  25    0.34    1.08
   0  -7  21    3.57    1.08
   0  -7  21    2.83    0.94
   0  -7  20    4.17    0.47
   0  -7  20    5.52    0.81
   0   7 -20    4.44    0.61
   0   7 -20    6.19    0.87
   0  -7  20    5.85    1.01
   0  -7  20    4.17    1.08
   0   7 -20    6.12    0.87
   0   7 -20    2.89    1.14
   0  -7  19    6.26    0.61
   0  -7  19    7.67    0.94
   0   7 -19    5.72    0.87
   0   7 -19    6.53    0.67
   0  -7  19    4.37    0.94
   0  -7  19    6.93    1.01
   0   7 -19    4.51    1.14
   0   7 -19    7.40    0.94
   0  -7  18   50.13    2.15
   0  -7  18   51.00    2.49
   0   7 -18   52.48    2.29
   0   7 -18   48.72    2.42
   0  -7  18   49.99    2.29
   0  -7  18   48.72    2.36
   0   7 -18   49.73    2.76
   0   7 -18   49.73    2.09
   0  -7  17    0.13    0.61
   0  -7  17    0.27    0.34
   0   7 -17   -0.20    0.34
   0   7 -17    0.27    0.61
   0  -7  17    0.07    0.74
   0  -7  17   -1.01    0.81
   0   7 -17    0.27    0.54
   0   7 -17    1.55    1.01
   0  -7  16    1.21    0.34
   0  -7  16    1.55    0.61
   0   7 -16    0.67    0.34
   0   7 -16    0.34    0.61
   0  -7  16    1.48    0.67
   0  -7  16    0.81    0.81
   0   7 -16    2.69    1.08
   0   7 -16    1.35    0.67
   0  -7  15   13.46    1.14
   0  -7  15   13.66    0.81
   0   7 -15   13.86    0.94
   0   7 -15   13.12    1.14
   0  -7  15   12.99    1.08
   0  -7  15   15.88    1.28
   0   7 -15   12.11    1.41
   0   7 -15   13.59    1.01
   0  -7  14   17.83    1.01
   0  -7  14   18.98    1.28
   0   7 -14   17.49    1.35
   0   7 -14   17.97    1.08
   0  -7  14   18.50    1.14
   0  -7  14   18.91    1.35
   0   7 -14   17.83    1.48
   0   7 -14   18.71    1.14
   0  -7  13    2.09    0.61
   0  -7  13    0.81    0.34
   0   7 -13    0.87    0.61
   0   7 -13    1.01    0.34
   0   7 -13    0.54    0.87
   0  -7  12    9.42    0.67
   0  -7  12   11.91    1.01
   0   7 -12    9.89    0.74
   0   7 -12   10.43    0.94
   0   7 -12   11.10    0.87
   0  -7  11    7.67    0.81
   0  -7  11    8.28    0.61
   0   7 -11    7.47    0.61
   0   7 -11    8.48    0.87
   0  -7  11    7.87    0.87
   0  -7  11    7.87    0.74
   0   7 -11    9.08    0.81
   0   7 -11    7.67    0.94
   0  -7  10   32.03    1.61
   0  -7  10   35.86    1.61
   0   7 -10   33.44    1.48
   0   7 -10   29.81    1.61
   0  -7  10   34.86    1.41
   0  -7  10   33.51    1.55
   0   7 -10   30.41    1.55
   0   7 -10   34.05    1.41
   0  -7   9    0.74    0.47
   0  -7   9    1.21    0.34
   0   7  -9    0.81    0.27
   0   7  -9    1.48    0.54
   0  -7   9    1.14    0.47
   0  -7   9    0.74    0.61
   0   7  -9    0.54    0.47
   0   7  -9    1.48    0.67
   0  -7   8   -0.13    0.34
   0  -7   8    0.20    0.40
   0   7  -8    0.07    0.47
   0   7  -8    0.20    0.27
   0  -7   8    0.07    0.40
   0  -7   8   -0.13    0.54
   0   7  -8   -0.40    0.40
   0   7  -8    0.34    0.61
   0  -7   7    3.84    0.47
   0  -7   7    3.30    0.54
   0   7  -7    3.36    0.40
   0   7  -7    3.57    0.61
   0  -7   7    3.10    0.54
   0  -7   7    4.24    0.67
   0   7  -7    3.97    0.54
   0   7  -7    3.63    0.67
   0  -7   6   10.83    0.74
   0  -7   6    9.08    0.87
   0  -7   5   44.21    1.82
   0   7  -5   44.28    1.95
   0   7  -5   45.35    1.88
   0  -7   5   42.66    1.61
   0  -7   5   47.30    1.61
   0   7  -5   43.94    1.55
   0   7  -5   45.42    1.75
   0  -7   4   15.48    1.01
   0  -7   4   14.53    0.87
   0   7  -4   14.40    0.87
   0   7  -4   14.94    1.01
   0  -7   3   76.04    2.89
   0  -7   3   76.17    2.96
   0   7  -3   77.99    2.96
   0   7  -3   77.25    3.10
   0  -7   3   81.01    2.42
   0  -7   3   80.61    2.36
   0   7  -3   78.12    2.42
   0   7  -3   74.22    2.22
   0  -7   2   12.92    0.81
   0  -7   2   13.39    0.74
   0   7  -2   13.52    0.87
   0   7  -2   15.07    0.74
   0  -7   2   14.87    0.94
   0  -7   2   14.13    0.87
   0   7  -2   13.52    0.94
   0   7  -2   13.32    0.81
   0  -7   1   12.04    0.67
   0  -7   1   12.85    0.74
   0   7  -1   12.04    0.67
   0   7  -1   12.25    0.81
   0  -7   1    9.49    0.81
   0  -7   1   10.03    0.81
   0   7  -1   10.30    0.74
   0   7  -1   11.30    0.87
   0  -7   0   82.29    3.10
   0  -7   0   84.04    3.16
   0   7   0   83.64    3.23
   0   7   0   85.72    3.16
   0   7   0   84.65    2.49
   0   7   0   81.89    2.49
   0  -7  -1    5.79    0.47
   0  -7  -1    6.19    0.47
   0  -7  -1    4.71    0.74
   0  -7  -1    5.11    0.67
   0   7   1    6.93    0.74
   0   7   1    6.46    0.81
   0  -7  -2   35.06    1.41
   0  -7  -2   34.99    1.41
   0   7   2   35.80    1.41
   0   7   2   33.37    1.41
   0  -7  -2   35.86    1.41
   0  -7  -2   32.63    1.41
   0   7   2   36.87    1.48
   0   7   2   36.07    1.41
   0  -7  -3    9.29    0.54
   0  -7  -3    8.41    0.54
   0   7   3    8.48    0.61
   0   7   3    8.21    0.47
   0  -7  -3    9.29    0.87
   0  -7  -3    6.73    0.74
   0   7   3    7.33    0.74
   0   7   3    7.27    0.81
   0  -7  -4    2.42    0.34
   0  -7  -4    1.88    0.34
   0   7   4    1.75    0.40
   0   7   4    3.10    0.34
   0  -7  -4    3.43    0.74
   0  -7  -4    2.69    0.67
   0   7   4    2.09    0.67
   0   7   4    1.61    0.61
   0  -7  -5    9.02    0.54
   0  -7  -5    8.68    0.54
   0   7   5    8.95    0.54
   0   7   5    8.75    0.54
   0  -7  -5    8.48    0.81
   0  -7  -5    7.94    0.81
   0   7   5    8.48    0.81
   0   7   5    6.73    0.81
   0  -7  -6  116.68    4.31
   0  -7  -6  115.13    4.24
   0   7   6  115.53    4.24
   0   7   6  110.96    4.10
   0  -7  -6  108.80    3.16
   0  -7  -6  110.42    3.16
   0   7   6  112.17    3.23
   0   7   6  107.46    3.16
   0  -7  -7  102.61    3.77
   0  -7  -7  101.20    3.77
   0   7   7  105.98    3.90
   0   7   7   98.64    3.70
   0   7   8   21.87    1.01
   0   7   8   21.94    1.08
   0  -7  -8   19.65    1.21
   0   7   8   20.66    1.28
   0  -7  -9    0.40    0.61
   0  -7  -9    0.47    0.61
   0   7   9    0.61    0.61
   0   7   9    1.01    0.67
   0  -7 -10   17.76    0.87
   0  -7 -10   20.05    1.01
   0   7  10   18.03    0.87
   0   7  10   18.64    1.01
   0  -7 -10   20.39    1.28
   0  -7 -10   19.92    1.21
   0   7  10   21.26    1.28
   0   7  10   21.46    1.28
   0   7  11   33.71    1.41
   0   7  11   32.50    1.55
   0  -7 -11   35.80    1.68
   0  -7 -11   34.45    1.61
   0   7  11   32.84    1.68
   0   7  11   33.31    1.61
   0   7  12   29.54    1.48
   0   7  12   31.63    1.35
   0  -7 -12   28.33    1.48
   0  -7 -12   26.58    1.48
   0   7  12   28.06    1.48
   0   7  12   28.19    1.55
   0  -7 -13    0.54    0.40
   0  -7 -13    0.07    0.20
   0   7  13    0.20    0.34
   0   7  13   -0.40    0.47
   0  -7 -13   -0.47    0.67
   0  -7 -13    0.00    0.74
   0   7  13    0.81    0.74
   0   7  13    1.41    0.74
   0  -7 -14    0.34    0.40
   0  -7 -14   -0.13    0.13
   0   7  14   -0.13    0.47
   0   7  14    0.07    0.34
   0  -7 -14    1.08    0.74
   0  -7 -14    0.67    0.67
   0   7  14    0.47    0.67
   0   7  14   -0.74    0.74
   0   7  15    5.45    0.47
   0   7  15    5.72    0.67
   0  -7 -15    5.38    1.01
   0  -7 -15    6.53    1.01
   0   7  15    5.58    0.94
   0   7  15    6.53    1.08
   0   7  16   43.06    1.82
   0   7  16   42.86    2.02
   0  -7 -16   46.36    2.29
   0  -7 -16   48.78    2.09
   0   7  16   41.99    2.15
   0   7  16   45.28    2.09
   0   7  17    3.36    0.67
   0   7  17    3.70    0.47
   0  -7 -17    2.69    0.94
   0  -7 -17    3.63    0.87
   0   7  17    1.95    1.01
   0   7  17    2.96    0.94
   0   7  18    2.96    0.67
   0   7  18    2.83    0.40
   0  -7 -18    2.15    0.94
   0  -7 -18    2.42    0.87
   0   7  18    3.63    1.14
   0   7  18    3.77    0.94
   0  -7 -19   21.67    1.28
   0  -7 -19   25.03    1.82
   0  -7 -19   27.99    1.75
   0   7  19   26.58    2.02
   0   7  19   27.92    1.75
   0  -7 -20   -0.07    0.20
   0  -7 -20    0.81    0.47
   0   7  20    1.35    0.47
   0   7  21   27.32    1.68
   0   7  21   28.06    1.35
   0  -7 -21   27.12    2.22
   0  -7 -21   26.11    1.75
   0   7  21   26.98    2.29
   0   7  21   26.58    1.88
   0   7  22    2.29    0.74
   0   7  22    1.68    0.40
   0  -7 -22    1.14    1.01
   0  -7 -22    1.48    0.87
   0   7  22    2.29    1.14
   0   7  22    2.22    1.01
   0  -7 -23    0.54    0.54
   0  -7 -23    0.07    3.97
   0   7  23    0.74    0.67
   0   7  23    0.61    0.40
   0  -7 -23    0.27    1.01
   0  -7 -23    1.01    1.08
   0   7  23    0.27    0.94
   0   7  23   -0.34    1.08
   0  -7 -24    0.47    0.54
   0  -7 -24    0.07    0.20
   0   7  24    0.07    0.61
   0   7  24    0.20    0.47
   0  -7 -24   -0.54    1.01
   0  -7 -24    0.00    1.01
   0   7  24    0.67    1.08
   0   7  24   -0.13    1.01
   0  -8  20    0.13    0.74
   0  -8  20    1.61    0.87
   0  -8  19    0.27    0.34
   0  -8  19   -0.07    0.54
   0   8 -19    0.67    0.67
   0   8 -19    0.13    0.40
   0  -8  19   -0.54    0.81
   0  -8  19   -0.07    0.81
   0   8 -19    0.81    0.61
   0   8 -19   -0.87    0.94
   0  -8  18    9.02    0.74
   0  -8  18    8.75    0.94
   0   8 -18    7.67    1.01
   0   8 -18    7.60    0.67
   0  -8  18    6.46    1.01
   0  -8  18    8.95    1.08
   0   8 -18    7.60    0.94
   0   8 -18    7.67    1.41
   0  -8  17    1.88    0.40
   0  -8  17    1.55    0.67
   0   8 -17    1.41    0.67
   0   8 -17    1.21    0.40
   0  -8  17    1.68    0.87
   0  -8  17    1.55    0.81
   0   8 -17    1.68    0.67
   0   8 -17    1.55    1.14
   0  -8  16    0.74    0.61
   0  -8  16    0.13    0.34
   0   8 -16   -0.27    0.34
   0   8 -16    0.87    0.67
   0  -8  16   -0.27    0.67
   0  -8  16    0.87    0.81
   0   8 -16    1.01    1.01
   0   8 -16   -0.27    0.61
   0  -8  15   36.87    1.68
   0  -8  15   35.19    1.88
   0   8 -15   35.86    1.68
   0   8 -15   31.89    1.88
   0  -8  15   34.99    1.88
   0  -8  15   34.99    1.68
   0   8 -15   37.01    1.68
   0   8 -15   34.86    2.15
   0  -8  14   51.54    2.56
   0  -8  14   50.47    2.15
   0   8 -14   48.04    2.15
   0   8 -14   55.04    2.62
   0  -8  14   52.08    2.02
   0  -8  14   51.88    2.29
   0   8 -14   50.74    2.02
   0   8 -14   50.40    2.49
   0  -8  13   11.30    1.01
   0  -8  13   11.44    0.81
   0   8 -13   11.10    0.81
   0   8 -13   10.43    1.01
   0  -8  13   10.70    0.94
   0  -8  13   11.78    1.14
   0   8 -13   12.65    1.28
   0   8 -13   11.91    0.94
   0  -8  12   22.14    1.35
   0  -8  12   23.48    1.21
   0   8 -12   22.34    1.48
   0   8 -12   22.07    1.14
   0  -8  12   21.20    1.55
   0  -8  12   20.99    1.21
   0   8 -12   21.46    1.55
   0  -8  11   74.49    2.96
   0  -8  11   71.53    3.03
   0   8 -11   79.53    3.43
   0   8 -11   72.20    2.89
   0  -8  10   25.43    1.41
   0  -8  10   23.42    1.21
   0   8 -10   21.73    1.08
   0   8 -10   22.54    1.41
   0  -8  10   18.57    1.35
   0   8 -10   23.15    1.21
   0  -8   9    0.61    0.34
   0  -8   9    0.20    0.47
   0   8  -9    0.20    0.54
   0   8  -9    0.81    0.34
   0  -8   9    0.74    0.47
   0  -8   9    0.74    0.61
   0   8  -9    0.94    0.47
   0   8  -9   -0.27    0.67
   0  -8   8    2.22    0.54
   0  -8   8    2.15    0.40
   0   8  -8    1.75    0.40
   0   8  -8    2.56    0.61
   0  -8   8    2.36    0.54
   0  -8   8    2.15    0.67
   0   8  -8    2.96    0.74
   0   8  -8    3.10    0.54
   0  -8   7   36.07    1.61
   0  -8   7   38.83    1.82
   0   8  -7   36.87    1.61
   0   8  -7   34.32    1.75
   0  -8   7   38.22    1.48
   0  -8   7   39.97    1.68
   0   8  -7   38.02    1.48
   0   8  -7   39.09    1.75
   0  -8   6   10.09    0.67
   0  -8   6    8.88    0.74
   0   8  -6    9.22    0.61
   0   8  -6    9.55    0.81
   0  -8   6    9.35    0.87
   0  -8   6   10.09    0.81
   0   8  -6    9.42    0.94
   0   8  -6    9.15    0.74
   0  -8   5  322.38   11.71
   0  -8   5  324.13   11.71
   0   8  -5  317.06   11.44
   0   8  -5  330.32   12.11
   0  -8   5  342.16    8.55
   0  -8   5  340.14    8.41
   0   8  -5  342.36    8.61
   0   8  -5  342.03    8.48
   0  -8   4   49.73    2.02
   0  -8   4   48.51    2.09
   0   8  -4   48.31    2.15
   0   8  -4   47.98    1.95
   0  -8   4   46.29    1.68
   0  -8   4   45.42    1.75
   0   8  -4   46.09    1.61
   0   8  -4   45.35    1.82
   0  -8   3    4.91    0.47
   0   8  -3    6.73    0.74
   0  -8   3    4.71    0.67
   0  -8   3    4.44    0.74
   0   8  -3    6.53    0.67
   0   8  -3    4.78    0.81
   0  -8   2    3.10    0.67
   0  -8   2    2.76    0.67
   0   8  -2    2.09    0.67
   0   8  -2    3.16    0.61
   0  -8   1  594.96   21.26
   0   8  -1  569.19   20.25
   0  -8   1  600.14   14.33
   0  -8   1  599.47   14.40
   0   8  -1  585.81   14.00
   0   8  -1  594.62   14.33
   0  -8   0  184.37    6.73
   0  -8   0  180.53    6.59
   0   8   0  182.22    6.59
   0   8   0  183.43    6.80
   0  -8   0  182.96    4.84
   0  -8   0  181.21    4.78
   0   8   0  188.54    4.91
   0   8   0  185.45    4.98
   0  -8  -1    7.67    0.61
   0  -8  -1    7.13    0.54
   0   8   1    7.60    0.54
   0   8   1    7.20    0.61
   0  -8  -1    6.93    0.81
   0  -8  -1    6.86    0.81
   0   8   1    7.40    0.87
   0   8   1    6.80    0.74
   0  -8  -2  345.66   12.38
   0  -8  -2  357.84   12.85
   0   8   2  358.58   12.92
   0   8   2  341.89   12.25
   0  -8  -2  354.00    8.75
   0  -8  -2  347.81    8.61
   0   8   2  360.46    8.95
   0   8   2  353.26    8.68
   0  -8  -3   12.58    1.01
   0  -8  -3   11.17    0.94
   0   8   3   14.06    1.01
   0   8   3   11.51    1.01
   0  -8  -4   86.67    3.23
   0  -8  -4   91.18    3.43
   0   8   4   91.44    3.43
   0   8   4   89.49    3.30
   0  -8  -4   83.30    2.62
   0   8   4   85.99    2.62
   0  -8  -5   21.94    1.01
   0  -8  -5   23.69    1.08
   0   8   5   20.99    1.01
   0   8   5   22.41    1.01
   0   8   6   45.28    1.82
   0   8   6   46.83    1.82
   0  -8  -6   46.16    1.75
   0   8   6   48.92    1.88
   0  -8  -7    4.64    0.81
   0  -8  -7    6.19    0.81
   0   8   7    5.52    0.87
   0   8   7    5.85    0.81
   0  -8  -8   13.46    0.74
   0   8   8   11.37    0.74
   0  -8  -8   14.80    1.08
   0  -8  -8   12.99    1.08
   0   8   8   14.80    1.14
   0   8   8   13.12    1.08
   0  -8  -9    7.87    0.54
   0  -8  -9    7.47    0.54
   0   8   9    7.87    0.61
   0   8   9    7.67    0.54
   0  -8  -9    5.52    0.81
   0  -8  -9    6.59    0.87
   0   8   9    7.74    0.94
   0   8   9    6.12    0.87
   0   8  10   72.60    2.89
   0   8  10   69.58    2.69
   0  -8 -10   66.14    2.42
   0  -8 -10   66.08    2.36
   0   8  10   70.18    2.56
   0   8  10   68.36    2.42
   0   8  11   26.78    1.21
   0   8  11   26.04    1.35
   0  -8 -11   24.90    1.48
   0  -8 -11   23.28    1.41
   0   8  11   27.18    1.55
   0   8  11   25.37    1.48
   0  -8 -12    0.67    0.34
   0  -8 -12    0.40    2.42
   0   8  12    0.47    0.34
   0   8  12    0.07    0.40
   0  -8 -12    0.74    0.74
   0  -8 -12    0.34    0.67
   0   8  12    1.14    0.74
   0   8  12    0.54    0.74
   0  -8 -13   -0.27    0.34
   0  -8 -13    0.00    0.20
   0   8  13    0.61    0.47
   0   8  13    0.74    0.34
   0  -8 -13    0.74    0.67
   0  -8 -13    0.47    0.74
   0   8  13    0.07    0.81
   0   8  13    0.54    0.74
   0   8  14    0.81    0.34
   0   8  14    1.41    0.54
   0  -8 -14    1.08    0.81
   0  -8 -14    1.35    0.81
   0   8  14    1.55    0.81
   0   8  14    2.09    0.94
   0   8  15   20.05    1.21
   0   8  15   22.61    1.08
   0  -8 -15   18.50    1.48
   0  -8 -15   23.01    1.48
   0   8  15   22.74    1.55
   0   8  15   22.34    1.61
   0  -8 -16    0.13    0.20
   0   8  16    1.95    0.61
   0   8  16    1.61    0.40
   0   8  16    3.84    0.94
   0   8  16    2.22    0.94
   0   8  17   17.23    1.14
   0   8  17   19.98    1.01
   0  -8 -17   17.83    1.41
   0  -8 -17   20.52    1.61
   0   8  17   19.31    1.48
   0   8  17   17.36    1.55
   0   8  18   19.58    1.01
   0   8  18   19.31    1.28
   0  -8 -18   21.80    1.48
   0  -8 -18   19.92    1.68
   0   8  18   15.75    1.68
   0   8  19    7.87    0.94
   0  -8 -20    0.40    0.54
   0  -8 -20   -0.20    0.20
   0   8  20    0.20    0.54
   0   8  20    0.87    0.40
   0  -8 -20    0.40    1.01
   0  -8 -20    0.47    0.87
   0   8  20   -0.34    0.94
   0   8  20    0.07    1.14
   0  -8 -21    1.48    0.54
   0  -8 -21    0.07    0.20
   0   8  21    2.62    0.67
   0   8  21    0.94    0.40
   0  -8 -21    1.35    1.01
   0  -8 -21    1.48    0.87
   0   8  21    1.61    1.01
   0   8  21   -0.13    1.08
   0   8  22    5.32    0.87
   0   8  22    4.91    0.54
   0  -8 -22    3.97    1.21
   0   8  22    4.64    1.28
   0   8  22    3.57    1.28
   0  -8 -23    1.01    0.61
   0  -8 -23   -0.13    0.20
   0   8  23    1.01    0.47
   0   8  23    1.14    0.67
   0  -8 -23    2.83    1.08
   0  -8 -23    0.47    1.01
   0   8  23    2.36    1.01
   0   8  23    0.67    1.14
   0   8  24    2.15    0.61
   0   8  24    2.62    0.61
   0  -8 -24    3.84    1.14
   0  -8 -24    1.55    1.21
   0   8  24    3.57    1.21
   0   8  24    2.29    1.14
   0  -9  20   -0.13    0.87
   0  -9  20    0.87    0.87
   0  -9  19    2.62    0.87
   0  -9  19    2.62    1.01
   0   9 -19    1.28    1.01
   0   9 -19    1.55    0.67
   0  -9  18   21.26    1.21
   0  -9  18   19.18    1.28
   0   9 -18   20.93    1.21
   0   9 -18   19.65    1.48
   0  -9  18   20.12    1.41
   0  -9  18   17.43    1.55
   0  -9  17    1.88    0.40
   0  -9  17    2.36    0.67
   0   9 -17    2.62    0.74
   0   9 -17    2.15    0.40
   0  -9  17    1.21    0.74
   0  -9  17    2.02    0.87
   0   9 -17    3.16    1.21
   0   9 -17    1.75    0.74
   0  -9  16   26.31    1.61
   0  -9  16   26.44    1.35
   0  -9  16   24.36    1.48
   0  -9  16   28.80    1.82
   0   9 -16   25.50    2.02
   0   9 -16   27.25    1.48
   0  -9  15   11.84    0.81
   0  -9  15   11.78    1.01
   0   9 -15    9.96    0.74
   0   9 -15   10.90    1.08
   0  -9  15   11.17    1.08
   0  -9  15   11.78    1.21
   0   9 -15   10.90    1.41
   0   9 -15   11.78    1.08
   0  -9  14    1.95    0.40
   0  -9  14    2.83    0.67
   0   9 -14    1.61    0.40
   0   9 -14    2.83    0.74
   0  -9  14    1.95    0.67
   0  -9  14    1.61    1.08
   0   9 -14    2.09    1.01
   0   9 -14    2.96    0.67
   0  -9  13   23.28    1.48
   0  -9  13   22.14    1.14
   0   9 -13   21.87    1.21
   0   9 -13   21.33    1.48
   0  -9  13   19.78    1.21
   0  -9  13   22.81    1.55
   0   9 -13   20.86    1.61
   0   9 -13   22.14    1.35
   0   9 -12   16.55    1.48
   0   9 -12   17.36    1.01
   0  -9  12   19.45    1.14
   0  -9  12   21.13    1.41
   0   9 -12   19.72    1.48
   0   9 -12   19.24    1.21
   0  -9  11   57.13    2.42
   0  -9  11   54.23    2.42
   0   9 -11   54.44    2.62
   0   9 -11   53.36    2.22
   0  -9  11   57.60    2.09
   0  -9  11   53.22    2.22
   0   9 -11   50.47    2.29
   0   9 -11   51.61    1.95
   0  -9  10  118.36    4.58
   0  -9  10  117.55    4.64
   0   9 -10  116.48    4.71
   0   9 -10  117.82    4.51
   0  -9  10  113.18    3.36
   0  -9  10  118.70    3.63
   0  -9   9   10.97    0.87
   0  -9   9   11.17    0.81
   0   9  -9   10.90    0.74
   0   9  -9   10.50    1.01
   0   9  -9    8.88    1.08
   0  -9   8   74.22    3.03
   0  -9   8   75.23    3.03
   0   9  -8   74.89    2.96
   0   9  -8   74.82    3.16
   0  -9   7  405.41   14.67
   0  -9   7  377.82   13.73
   0   9  -7  391.55   14.13
   0   9  -7  398.68   14.53
   0   9  -7  353.06    9.02
   0  -9   6   16.96    0.94
   0  -9   6   16.75    1.01
   0   9  -6   17.43    1.14
   0   9  -6   15.34    0.87
   0  -9   6   17.36    1.21
   0   9  -6   19.65    1.14
   0  -9   5    0.87    0.40
   0  -9   5    1.41    0.47
   0   9  -5    1.48    0.34
   0   9  -5    0.87    0.61
   0  -9   5    1.14    0.67
   0  -9   5    1.48    0.54
   0   9  -5    1.82    0.61
   0  -9   4   32.16    1.48
   0  -9   4   33.31    1.55
   0  -9   4   31.02    1.41
   0  -9   4   29.40    1.41
   0   9  -4   29.40    1.35
   0  -9   3  230.13    8.41
   0  -9   3  239.68    8.75
   0   9  -3  225.01    8.14
   0   9  -3  236.18    8.75
   0  -9   3  236.11    6.12
   0  -9   3  241.36    6.19
   0   9  -3  220.84    5.99
   0   9  -3  233.76    5.99
   0  -9   2   78.86    3.10
   0  -9   2   82.97    3.23
   0   9  -2   81.89    3.10
   0   9  -2   81.08    3.30
   0  -9   2   72.00    2.42
   0  -9   2   71.12    2.36
   0   9  -2   71.59    2.29
   0  -9   1  579.96   20.72
   0  -9   1  565.69   20.25
   0   9  -1  587.90   20.93
   0   9  -1  593.95   21.33
   0  -9   1  615.08   14.87
   0   9  -1  579.55   13.86
   0  -9   0   96.96    3.70
   0   9   0  107.39    4.10
   0   9   0  107.26    4.04
   0  -9   0   90.30    2.96
   0   9   0   99.99    2.96
   0  -9  -1  351.58   12.65
   0   9   1  432.53   15.68
   0  -9  -3  200.85    5.32
   0   9   3  208.79    5.58
   0  -9  -4    2.15    0.74
   0  -9  -4    2.49    0.67
   0   9   4    3.10    0.74
   0   9   4    2.69    0.81
   0  -9  -5   47.03    1.95
   0  -9  -5   44.68    1.75
   0  -9  -5   43.94    1.82
   0   9   5   44.01    1.75
   0   9   5   39.90    1.75
   0  -9  -6  115.06    4.31
   0   9   6  106.32    3.97
   0   9   6  108.74    4.04
   0  -9  -6  111.97    3.36
   0  -9  -6  118.36    3.50
   0   9   6  108.74    3.36
   0   9   6  116.00    3.43
   0  -9  -7  118.43    4.37
   0  -9  -7  124.15    4.58
   0   9   7  115.60    4.31
   0   9   7  126.17    4.64
   0  -9  -7  119.37    3.57
   0  -9  -7  126.70    3.70
   0   9   7  129.80    3.77
   0   9   7  122.67    3.70
   0  -9  -8   94.34    3.57
   0  -9  -8   98.71    3.70
   0   9   8   92.72    3.50
   0   9   8  100.53    3.77
   0  -9  -8  101.67    3.16
   0  -9  -8  100.80    3.16
   0   9   8   99.12    3.10
   0   9   8  100.80    3.23
   0  -9  -9   21.94    1.01
   0  -9  -9   19.85    0.94
   0   9   9   20.79    1.01
   0   9   9   19.24    1.01
   0  -9  -9   18.57    1.21
   0  -9  -9   17.76    1.28
   0   9   9   19.31    1.28
   0   9   9   18.17    1.35
   0   9  10   91.92    3.57
   0   9  10   92.05    3.50
   0  -9 -10   94.47    3.10
   0  -9 -10   94.47    3.10
   0   9  10   92.99    3.16
   0   9  10   96.22    3.10
   0  -9 -11    0.61    0.34
   0  -9 -11   -0.20    0.20
   0   9  11    1.41    0.47
   0   9  11    0.40    0.34
   0  -9 -11   -0.20    0.74
   0  -9 -11    0.00    0.74
   0   9  11    1.41    0.81
   0   9  11    0.87    0.74
   0  -9 -12    0.54    0.34
   0  -9 -12    0.07    0.20
   0   9  12   -0.13    0.34
   0   9  12    0.00    0.47
   0  -9 -12    0.40    0.74
   0  -9 -12    0.61    0.67
   0   9  12    0.81    0.74
   0   9  12    0.13    0.67
   0   9  13   15.68    0.81
   0   9  13   15.41    1.01
   0  -9 -13   16.22    1.28
   0  -9 -13   14.13    1.21
   0   9  13   16.89    1.35
   0   9  13   16.35    1.35
   0   9  14    9.49    0.87
   0   9  14   10.90    0.67
   0  -9 -14   10.09    1.14
   0  -9 -14   10.03    1.08
   0   9  14   10.36    1.21
   0   9  14    9.02    1.21
   0   9  15   46.77    1.95
   0   9  15   44.81    2.09
   0  -9 -15   39.30    2.02
   0  -9 -15   37.55    1.82
   0   9  15   42.12    2.15
   0   9  15   43.87    2.29
   0   9  16    1.68    0.40
   0   9  16    1.61    0.61
   0  -9 -16    1.35    0.81
   0  -9 -16    0.27    0.81
   0   9  16    2.22    0.94
   0   9  16    1.14    0.87
   0   9  17   12.31    1.01
   0   9  17   12.78    0.81
   0  -9 -17   12.58    1.41
   0  -9 -17   11.57    1.21
   0   9  17   12.38    1.41
   0   9  17   11.98    1.35
   0  -9 -19    0.00    0.40
   0  -9 -19    0.07    0.20
   0   9  19    0.34    0.40
   0   9  19   -0.20    0.61
   0  -9 -19   -0.94    0.94
   0  -9 -19   -0.07    0.74
   0   9  19    0.54    1.01
   0   9  19    0.74    0.94
   0  -9 -20    0.07    0.20
   0  -9 -20    0.81    0.47
   0   9  20    0.47    0.61
   0   9  20    0.34    0.40
   0  -9 -20    1.08    0.94
   0  -9 -20   -0.20    0.74
   0   9  20    0.40    0.87
   0   9  20   -0.20    1.08
   0  -9 -21   -0.13    0.20
   0  -9 -21    0.81    0.47
   0   9  21    1.14    0.61
   0   9  21    1.14    0.40
   0  -9 -21    0.47    1.01
   0  -9 -21    1.21    0.94
   0   9  21    1.68    1.14
   0   9  21   -0.61    1.01
   0  -9 -22    0.13    0.20
   0  -9 -22    0.13    0.54
   0   9  22    0.34    0.40
   0   9  22   -0.47    0.61
   0  -9 -22   -1.21    1.01
   0  -9 -22    1.08    0.94
   0   9  22    0.61    0.94
   0   9  22    2.56    1.14
   0  -9 -23   -0.34    0.20
   0  -9 -23    1.08    0.54
   0   9  23    0.47    0.47
   0   9  23    0.74    0.67
   0  -9 -23    0.47    0.94
   0  -9 -23    0.27    1.08
   0   9  23    1.08    1.08
   0   9  23   -0.13    1.01
   0  -9 -24    0.27    0.20
   0  -9 -24    0.81    1.08
   0  -9 -24    0.00    1.08
   0   9  24    0.00    1.08
   0   9  24    1.28    1.14
   0 -10  19    0.27    0.94
   0 -10  19   -0.40    0.81
   0 -10  18    3.63    1.01
   0 -10  18    2.02    0.81
   0  10 -18    1.82    1.08
   0  10 -18    1.55    0.67
   0 -10  17    2.76    0.47
   0 -10  17    3.30    0.67
   0  10 -17    2.49    0.81
   0  10 -17    3.43    0.54
   0 -10  17    3.97    0.87
   0 -10  17    3.43    1.08
   0  10 -17    3.90    0.81
   0  10 -17    4.51    1.14
   0 -10  16    1.95    0.47
   0 -10  16    1.68    0.67
   0  10 -16    2.02    0.47
   0  10 -16    0.54    0.74
   0 -10  16    2.62    0.74
   0 -10  16    2.42    0.94
   0  10 -16    2.83    1.14
   0  10 -16    0.81    0.67
   0 -10  15   21.94    1.41
   0 -10  15   21.87    1.21
   0  10 -15   23.75    1.28
   0  10 -15   20.52    1.48
   0 -10  15   22.00    1.41
   0 -10  15   20.52    1.61
   0  10 -15   21.87    1.41
   0  10 -15   20.59    1.82
   0 -10  14    5.72    0.61
   0 -10  14    7.27    0.87
   0  10 -14    5.92    0.87
   0  10 -14    5.72    0.61
   0 -10  14    6.86    0.87
   0 -10  14    5.79    1.08
   0 -10  13    8.21    0.87
   0 -10  13    8.28    0.67
   0  10 -13    7.94    0.67
   0  10 -13    7.87    0.94
   0 -10  13    9.22    0.87
   0 -10  13    7.54    1.14
   0  10 -13    9.49    0.94
   0  10 -13    9.69    1.28
   0 -10  12    9.29    0.94
   0 -10  12    7.40    0.67
   0  10 -12    7.94    0.67
   0  10 -12    7.20    0.94
   0 -10  12    7.00    0.81
   0 -10  12    6.39    1.08
   0  10 -12    8.61    1.21
   0  10 -12    8.41    0.94
   0 -10  11   19.85    1.35
   0  10 -11   18.84    1.14
   0 -10  11   23.69    1.35
   0 -10  11   23.21    1.48
   0  10 -11   22.81    1.35
   0  10 -11   23.95    1.68
   0 -10  10   -0.13    0.34
   0 -10  10    1.35    0.54
   0  10 -10    0.13    0.40
   0  10 -10    0.74    0.67
   0 -10  10    0.40    0.61
   0 -10  10    0.47    0.74
   0  10 -10    0.54    0.81
   0  10 -10    0.54    0.54
   0 -10   9   78.73    3.23
   0 -10   9   81.89    3.30
   0  10  -9   83.50    3.30
   0  10  -9   84.78    3.63
   0 -10   9   81.55    2.69
   0 -10   9   82.56    2.89
   0  10  -9   80.68    2.96
   0  10  -9   77.99    2.62
   0 -10   8   68.84    2.83
   0 -10   8   63.92    2.69
   0  10  -8   65.74    2.96
   0  10  -8   62.04    2.49
   0 -10   8   62.78    2.22
   0 -10   8   64.06    2.42
   0  10  -8   64.33    2.62
   0  10  -8   63.39    2.29
   0 -10   7   68.57    2.83
   0 -10   7   67.49    2.83
   0  10  -7   66.28    2.62
   0  10  -7   67.09    2.96
   0 -10   7   71.19    2.42
   0 -10   7   72.81    2.56
   0  10  -7   68.57    2.36
   0  10  -7   68.57    2.62
   0 -10   6  159.34    5.99
   0 -10   6  156.11    5.92
   0 -10   6  148.44    4.37
   0  10  -6  159.61    4.37
   0  10  -6  164.05    4.78
   0 -10   5    9.15    0.74
   0 -10   5    7.74    0.67
   0  10  -5    8.21    0.61
   0  10  -5    8.95    0.87
   0 -10   5    9.62    0.94
   0 -10   5    8.01    0.87
   0  10  -5    7.20    1.08
   0  10  -5    7.74    0.87
   0 -10   4  273.86   10.03
   0 -10   4  266.66    9.76
   0  10  -4  269.89    9.76
   0  10  -4  284.09   10.56
   0 -10   4  278.77    7.20
   0 -10   4  283.82    7.27
   0  10  -4  287.86    7.60
   0  10  -4  276.89    7.07
   0 -10   3    1.88    0.47
   0 -10   3    1.75    0.47
   0  10  -3    2.22    0.40
   0  10  -3    1.21    0.61
   0 -10   3    2.36    0.67
   0 -10   3    1.08    0.61
   0  10  -3    2.02    0.81
   0  10  -3    0.34    0.61
   0 -10   2   21.13    1.08
   0 -10   2   21.13    1.14
   0  10  -2   22.14    1.08
   0  10  -2   20.12    1.21
   0 -10   2   24.02    1.35
   0 -10   2   21.33    1.28
   0  10  -2   22.88    1.41
   0  10  -2   22.95    1.21
   0 -10   1    4.71    0.54
   0 -10   1    4.37    0.47
   0  10  -1    2.89    0.34
   0  10  -1    3.77    0.61
   0 -10   1    3.70    0.81
   0 -10   1    4.78    0.74
   0  10  -1    4.24    0.74
   0  10  -1    3.23    0.81
   0 -10   0  168.35    6.19
   0 -10   0  177.84    6.53
   0  10   0  174.88    6.53
   0  10   0  179.39    6.53
   0 -10   0  169.23    4.64
   0 -10   0  182.15    4.98
   0  10   0  174.21    4.64
   0  10   0  174.95    4.84
   0 -10  -1    4.17    0.47
   0 -10  -1    3.16    0.47
   0  10   1    3.57    0.54
   0  10   1    4.51    0.40
   0 -10  -1    5.52    0.87
   0 -10  -1    4.44    0.81
   0 -10  -2  915.12   32.57
   0 -10  -2  840.43   29.88
   0  10   2  845.14   30.01
   0  10   2  871.38   31.09
   0 -10  -2  868.69   20.72
   0 -10  -2  897.62   21.40
   0  10   2  884.84   21.20
   0  10   2  847.83   20.12
   0 -10  -3   24.90    1.14
   0 -10  -3   24.43    1.21
   0  10   3   27.45    1.21
   0  10   3   25.84    1.35
   0 -10  -4   20.25    1.01
   0 -10  -4   17.90    0.94
   0  10   4   19.58    0.94
   0  10   4   17.36    1.01
   0 -10  -4   16.35    1.21
   0 -10  -4   15.21    1.14
   0  10   4   16.75    1.14
   0  10   4   15.54    1.28
   0 -10  -5  299.10   10.77
   0 -10  -5  283.35   10.23
   0  10   5  292.16   10.56
   0  10   5  282.14   10.16
   0 -10  -5  277.70    7.20
   0 -10  -5  272.72    7.13
   0  10   5  287.05    7.33
   0  10   5  288.19    7.60
   0 -10  -6    0.34    0.34
   0 -10  -6    0.20    0.40
   0  10   6    0.07    0.40
   0  10   6    0.00    0.34
   0 -10  -6    0.07    0.81
   0 -10  -6   -0.74    0.67
   0  10   6   -0.07    0.74
   0  10   6    0.47    0.67
   0 -10  -7  192.04    7.00
   0 -10  -7  190.02    6.93
   0  10   7  180.40    6.59
   0  10   7  187.13    6.80
   0 -10  -7  204.29    5.58
   0 -10  -7  204.89    5.58
   0  10   7  188.68    5.18
   0  10   7  205.77    5.72
   0 -10  -8   55.58    2.22
   0 -10  -8   51.74    2.09
   0  10   8   50.26    2.09
   0  10   8   55.78    2.22
   0 -10  -8   56.86    2.22
   0 -10  -8   58.27    2.29
   0  10   8   50.80    2.15
   0  10   8   49.46    2.02
   0 -10  -9   12.31    0.74
   0 -10  -9   11.37    0.67
   0 -10  -9   12.85    1.08
   0 -10  -9   11.84    1.14
   0  10   9   12.85    1.14
   0  10   9   12.11    1.21
   0 -10 -10   55.92    2.22
   0 -10 -10   56.93    2.29
   0  10  10   57.40    2.36
   0  10  10   55.38    2.22
   0 -10 -10   52.42    2.09
   0 -10 -10   57.53    2.29
   0  10  10   51.41    2.22
   0  10  10   52.22    2.15
   0  10  11  113.45    4.24
   0  10  11  121.99    4.64
   0 -10 -11  117.96    3.70
   0 -10 -11  120.04    3.77
   0  10  11  123.00    3.84
   0  10  11  115.53    3.77
   0  10  12    1.55    0.40
   0  10  12    2.69    0.54
   0 -10 -12    2.02    0.81
   0 -10 -12    1.95    0.81
   0  10  12    1.28    0.81
   0  10  12    1.28    0.81
   0  10  13   81.35    3.10
   0  10  13   80.34    3.30
   0 -10 -13   85.25    3.03
   0 -10 -13   82.90    2.96
   0  10  13   78.86    3.03
   0  10  13   82.16    2.96
   0 -10 -14    0.00    0.20
   0  10  14    0.34    0.34
   0  10  14    0.61    0.54
   0 -10 -14    0.54    0.74
   0 -10 -14   -0.20    0.74
   0  10  14   -0.67    0.81
   0  10  14    1.35    0.81
   0  10  15    6.12    0.74
   0  10  15    5.45    0.54
   0 -10 -15    4.51    0.94
   0 -10 -15    5.79    1.01
   0  10  15    4.91    1.08
   0  10  15    4.44    1.08
   0 -10 -16    0.13    0.20
   0 -10 -16   -0.40    0.40
   0  10  16    0.13    0.34
   0  10  16   -0.34    0.54
   0 -10 -16    1.95    0.81
   0 -10 -16   -0.67    0.74
   0  10  16    0.20    0.94
   0  10  16   -1.08    0.87
   0 -10 -17    0.13    0.20
   0  10  17    2.36    0.67
   0 -10 -18   -0.07    0.20
   0 -10 -18    0.54    0.40
   0  10  18    0.00    0.40
   0  10  18    0.00    0.61
   0 -10 -18    0.40    1.01
   0 -10 -18   -0.20    0.81
   0  10  18    0.00    0.94
   0  10  18    0.87    1.01
   0 -10 -19   11.44    1.55
   0 -10 -19    9.96    1.28
   0  10  19   12.58    1.41
   0 -10 -20   -0.13    0.40
   0 -10 -20    0.40    0.27
   0  10  20    0.07    0.61
   0  10  20    0.00    0.40
   0 -10 -20   -0.27    0.87
   0 -10 -20   -0.13    0.94
   0  10  20   -1.01    0.94
   0  10  20   -0.34    1.08
   0  10  21    2.09    0.47
   0  10  21    1.82    0.67
   0 -10 -21    1.68    1.01
   0 -10 -21    1.48    1.01
   0  10  21    0.47    1.21
   0  10  21    2.09    1.08
   0  10  22    2.09    0.67
   0  10  22    3.23    0.54
   0 -10 -22    1.08    1.08
   0 -10 -22    1.35    1.08
   0  10  22    1.75    1.14
   0  10  22    2.15    1.01
   0 -10 -23    1.14    0.61
   0 -10 -23    0.07    0.27
   0  10  23    1.68    0.54
   0  10  23    1.28    0.67
   0 -10 -23    0.61    1.08
   0 -10 -23   -0.74    1.08
   0  10  23    1.88    1.14
   0  10  23    1.08    1.08
   0 -11  18    2.89    0.94
   0 -11  18    2.09    1.01
   0 -11  17    0.47    0.81
   0 -11  17    0.20    0.74
   0  11 -17   -0.94    0.87
   0  11 -17    0.20    0.67
   0 -11  16    2.22    0.47
   0 -11  16    1.41    0.67
   0  11 -16    0.74    0.74
   0  11 -16    2.56    0.54
   0 -11  16    2.36    1.01
   0 -11  16    4.24    0.87
   0  11 -16    3.43    1.21
   0  11 -16    2.29    0.74
   0 -11  15    0.34    0.61
   0 -11  15    0.67    0.40
   0  11 -15    0.07    0.40
   0  11 -15   -0.27    0.67
   0 -11  15    0.47    0.67
   0 -11  15   -0.94    0.81
   0  11 -15    1.68    0.67
   0  11 -15    0.20    1.01
   0 -11  14    7.00    0.67
   0 -11  14    8.68    0.94
   0  11 -14    7.60    0.94
   0  11 -14    8.21    0.74
   0 -11  14    7.33    0.87
   0 -11  14    8.07    1.21
   0  11 -14    9.22    1.35
   0  11 -14    8.01    0.94
   0 -11  13    3.16    0.54
   0 -11  13    3.97    0.67
   0  11 -13    2.76    0.74
   0  11 -13    3.23    0.54
   0 -11  13    3.70    0.74
   0 -11  13    3.70    1.08
   0  11 -13    3.63    0.81
   0  11 -13    3.90    1.08
   0 -11  12   13.12    0.94
   0 -11  12   13.46    1.08
   0  11 -12   13.12    1.21
   0  11 -12   13.32    0.87
   0 -11  12   14.40    1.35
   0 -11  12   14.87    1.08
   0  11 -12   13.66    1.21
   0  11 -12   17.23    1.55
   0 -11  11    0.74    0.40
   0 -11  11    0.20    0.54
   0  11 -11    0.74    0.67
   0  11 -11    0.13    0.40
   0 -11  11    1.01    0.61
   0 -11  11    1.41    0.87
   0  11 -11    1.28    0.94
   0  11 -11    1.01    0.81
   0 -11  10   13.73    1.08
   0 -11  10   13.59    1.28
   0  11 -10   14.60    1.41
   0  11 -10   14.47    1.21
   0 -11   9  138.55    5.38
   0 -11   9  139.35    5.38
   0  11  -9  142.52    5.38
   0  11  -9  148.37    5.92
   0 -11   9  132.89    3.90
   0 -11   9  139.62    4.31
   0  11  -9  140.97    4.51
   0  11  -9  144.40    4.24
   0 -11   8   27.79    1.48
   0 -11   8   28.06    1.48
   0  11  -8   29.27    1.41
   0  11  -8   30.01    1.75
   0 -11   8   32.37    1.61
   0 -11   8   29.67    1.68
   0  11  -8   33.91    1.95
   0  11  -8   31.29    1.55
   0 -11   7    7.47    0.74
   0 -11   7    6.39    0.67
   0  11  -7    6.19    0.87
   0  11  -7    6.19    0.54
   0 -11   7    7.60    0.87
   0 -11   7    5.72    0.94
   0  11  -7    6.26    1.14
   0  11  -7    4.44    0.81
   0 -11   6    7.81    0.67
   0 -11   6    9.89    0.81
   0  11  -6    8.21    0.61
   0  11  -6    9.42    0.94
   0 -11   6   10.97    1.01
   0 -11   6    8.68    1.08
   0  11  -6    9.55    1.14
   0  11  -6    9.96    0.94
   0 -11   5    7.94    0.74
   0 -11   5    8.55    0.74
   0  11  -5    8.07    0.61
   0  11  -5    7.60    0.94
   0  11  -5    7.67    1.08
   0  11  -5    6.73    0.87
   0 -11   4   11.84    0.81
   0 -11   4   12.52    0.87
   0  11  -4   11.37    0.67
   0  11  -4   12.38    1.08
   0 -11   4   11.51    1.01
   0 -11   4   12.52    1.08
   0  11  -4   12.38    1.28
   0  11  -4   13.32    1.01
   0 -11   3  259.19    9.49
   0 -11   3  279.78   10.23
   0  11  -3  276.02   10.30
   0  11  -3  249.77    9.08
   0 -11   3  278.51    7.27
   0 -11   3  262.36    6.86
   0  11  -3  278.64    7.47
   0  11  -3  283.82    7.27
   0 -11   2   14.40    0.87
   0 -11   2   13.39    0.87
   0  11  -2   15.81    0.87
   0  11  -2   13.66    1.08
   0 -11   2   16.42    1.21
   0 -11   2   13.05    1.01
   0  11  -2   14.27    1.28
   0  11  -2   13.32    1.08
   0 -11   1  112.64    4.31
   0 -11   1  107.53    4.10
   0  11  -1  107.53    4.04
   0  11  -1  110.96    4.44
   0 -11   1  102.08    3.16
   0 -11   1  101.74    3.23
   0  11  -1  102.88    3.36
   0  11  -1  103.89    3.16
   0 -11   0   85.46    3.30
   0 -11   0   82.83    3.23
   0  11   0   87.21    3.50
   0  11   0   83.91    3.16
   0 -11   0   78.66    2.69
   0 -11   0   81.28    2.76
   0  11   0   84.72    2.96
   0  11   0   85.99    2.69
   0 -11  -1    2.96    0.47
   0 -11  -1    4.17    0.47
   0  11   1    4.31    0.40
   0  11   1    4.24    0.61
   0 -11  -1    3.77    0.87
   0 -11  -1    2.56    0.74
   0  11   1    2.02    0.81
   0  11   1    3.84    0.74
   0 -11  -2   50.80    2.09
   0 -11  -2   51.88    2.15
   0  11   2   53.83    2.36
   0  11   2   48.78    1.95
   0 -11  -2   47.98    2.02
   0 -11  -2   41.31    1.88
   0  11   2   44.41    1.82
   0  11   2   43.20    2.09
   0 -11  -3  100.86    3.84
   0 -11  -3   98.71    3.70
   0  11   3  103.42    3.84
   0  11   3  101.81    3.97
   0 -11  -3  103.15    3.23
   0 -11  -3   98.85    3.16
   0  11   3  101.87    3.10
   0  11   3   98.44    3.30
   0 -11  -4   28.93    1.35
   0 -11  -4   31.02    1.35
   0  11   4   33.37    1.61
   0  11   4   31.22    1.35
   0 -11  -4   30.89    1.61
   0 -11  -4   34.38    1.68
   0  11   4   34.72    1.82
   0  11   4   31.36    1.55
   0 -11  -5   76.44    2.96
   0 -11  -5   76.10    2.89
   0  11   5   77.58    2.96
   0  11   5   72.81    2.89
   0 -11  -5   72.81    2.56
   0 -11  -5   77.92    2.69
   0  11   5   74.08    2.49
   0  11   5   76.71    2.83
   0 -11  -6   23.55    1.08
   0 -11  -6   23.75    1.14
   0  11   6   24.43    1.21
   0  11   6   26.98    1.21
   0 -11  -6   24.22    1.48
   0 -11  -6   22.88    1.48
   0 -11  -7    4.37    0.47
   0 -11  -7    4.31    0.47
   0  11   7    4.24    0.54
   0  11   7    3.77    0.47
   0 -11  -7    4.91    0.87
   0 -11  -7    3.90    0.87
   0  11   7    4.31    0.87
   0  11   7    4.91    0.94
   0 -11  -8   83.10    3.16
   0 -11  -8   80.68    3.10
   0  11   8   86.47    3.30
   0  11   8   80.34    3.16
   0 -11  -8   77.18    2.69
   0 -11  -8   86.06    3.10
   0  11   8   87.74    3.16
   0  11   8   81.75    2.76
   0 -11  -9    7.40    0.61
   0 -11  -9    6.53    0.61
   0  11   9    7.20    0.61
   0  11   9    7.47    0.61
   0 -11  -9    7.74    1.01
   0 -11  -9    7.74    1.01
   0  11   9    8.81    1.01
   0  11   9    7.07    1.08
   0 -11 -10    9.29    0.67
   0 -11 -10   10.23    0.74
   0  11  10   10.77    0.74
   0  11  10    8.88    0.74
   0 -11 -10    9.22    1.08
   0 -11 -10    9.49    1.08
   0  11  10   11.04    1.21
   0  11  10   10.97    1.08
   0 -11 -11    1.41    0.40
   0 -11 -11    1.08    0.40
   0  11  11    1.01    0.54
   0  11  11    0.47    0.40
   0 -11 -11    0.47    0.74
   0 -11 -11    1.35    0.81
   0  11  11   -0.47    0.74
   0  11  11    0.40    0.87
   0 -11 -12    0.00    0.20
   0 -11 -12    0.27    0.34
   0  11  12   -0.13    0.47
   0  11  12    0.47    0.34
   0 -11 -12   -1.28    0.67
   0 -11 -12    0.00    0.81
   0  11  12    0.74    0.81
   0  11  12   -0.20    0.81
   0 -11 -13   -0.40    0.20
   0  11  13    3.10    0.47
   0  11  13    3.30    0.61
   0 -11 -13    1.48    0.87
   0 -11 -13    2.42    0.94
   0  11  13    5.25    1.01
   0  11  13    4.37    1.01
   0  11  14   42.39    2.09
   0  11  14   42.73    1.82
   0 -11 -14   44.75    2.22
   0 -11 -14   39.63    2.02
   0  11  14   39.83    2.09
   0  11  14   40.24    2.22
   0 -11 -15    1.14    0.40
   0 -11 -15    0.34    0.20
   0  11  15    1.55    0.61
   0  11  15    2.22    0.40
   0 -11 -15    0.74    0.94
   0  11  15    0.87    1.08
   0  11  16    4.44    0.74
   0  11  16    3.77    0.54
   0  11  16    2.62    1.14
   0  11  16    4.17    1.14
   0 -11 -17    0.13    0.40
   0 -11 -17    0.00    0.87
   0 -11 -17    0.34    0.81
   0  11  17    0.20    0.94
   0  11  17    0.94    0.94
   0 -11 -18    0.00    0.20
   0 -11 -18    0.81    0.40
   0  11  18    0.74    0.61
   0  11  18    0.20    0.40
   0 -11 -18    1.82    1.01
   0 -11 -18    0.54    0.81
   0  11  18    1.14    0.94
   0  11  18    0.40    1.08
   0  11  19    8.34    0.94
   0  11  19    9.69    0.74
   0 -11 -19   10.97    1.55
   0 -11 -19    8.01    1.28
   0  11  19    9.62    1.55
   0 -11 -20    0.61    0.47
   0 -11 -20    0.20    0.27
   0  11  20    0.07    0.40
   0  11  20    0.61    0.61
   0 -11 -20    0.27    0.87
   0 -11 -20   -0.61    1.08
   0  11  20   -0.07    1.01
   0  11  20   -0.40    1.01
   0  11  21    1.01    0.67
   0  11  21    0.47    0.47
   0 -11 -21    1.68    1.08
   0 -11 -21    1.01    1.01
   0  11  21    1.35    1.08
   0  11  21    1.35    1.01
   0  11  22    3.23    0.61
   0  11  22    1.08    0.67
   0 -11 -22    1.95    1.08
   0 -11 -22    3.03    1.08
   0  11  22    2.83    1.14
   0  11  22    0.13    1.08
   0 -11 -23   -0.07    0.20
   0  11  23    0.87    0.54
   0  11  23    0.74    0.54
   0 -11 -23    1.48    1.08
   0 -11 -23    0.67    1.14
   0  11  23   -0.40    1.08
   0  11  23    0.20    1.08
   0 -12  17    5.85    1.01
   0 -12  17    3.97    1.08
   0 -12  16    3.23    0.94
   0 -12  16    1.75    0.74
   0  12 -16    3.97    0.94
   0  12 -16    3.30    1.08
   0 -12  15    9.29    0.94
   0 -12  15    8.34    0.74
   0  12 -15    8.81    1.08
   0  12 -15    7.81    0.74
   0 -12  15    8.41    1.28
   0 -12  15    8.68    1.08
   0  12 -15    9.15    1.41
   0  12 -15    8.48    1.14
   0 -12  14    0.94    0.54
   0 -12  14    0.20    0.40
   0  12 -14    1.48    0.47
   0  12 -14    1.35    0.74
   0 -12  14    2.15    0.94
   0 -12  14    1.01    0.67
   0  12 -14    1.21    0.81
   0  12 -14    0.54    0.94
   0 -12  13    0.54    0.54
   0 -12  13    0.00    0.40
   0  12 -13    0.07    0.67
   0  12 -13   -0.07    0.34
   0 -12  13   -0.74    0.87
   0 -12  13   -0.13    0.61
   0  12 -13   -0.54    0.74
   0  12 -13   -1.48    0.87
   0 -12  12    1.14    0.54
   0 -12  12    1.95    0.47
   0  12 -12    2.42    0.74
   0  12 -12    1.68    0.40
   0 -12  12    1.88    0.94
   0 -12  12    2.22    0.67
   0  12 -12    0.40    1.01
   0  12 -12    1.95    0.81
   0 -12  11   16.35    1.08
   0 -12  11   17.36    1.14
   0 -12  11   17.23    1.48
   0 -12  11   16.69    1.21
   0  12 -11   17.16    1.35
   0  12 -11   16.55    1.61
   0 -12  10    9.02    0.81
   0 -12  10   10.50    0.87
   0  12 -10   10.23    1.08
   0  12 -10    9.49    0.74
   0 -12  10   10.83    1.01
   0 -12  10   11.57    1.21
   0  12 -10    9.89    1.35
   0  12 -10   10.97    1.14
   0 -12   9   56.45    2.49
   0 -12   9   53.70    2.42
   0  12  -9   58.74    2.83
   0  12  -9   53.43    2.29
   0 -12   9   55.78    2.22
   0 -12   9   53.09    2.36
   0  12  -9   53.09    2.22
   0  12  -9   50.87    2.56
   0 -12   8   61.16    2.69
   0 -12   8   69.37    2.69
   0 -12   8   73.95    2.69
   0  12  -8   65.07    2.42
   0  12  -8   73.41    3.10
   0 -12   7   15.48    1.01
   0 -12   7   15.68    1.08
   0  12  -7   16.96    1.28
   0  12  -7   15.54    0.94
   0 -12   7   20.05    1.48
   0 -12   7   17.29    1.28
   0  12  -7   17.43    1.28
   0  12  -7   17.70    1.55
   0 -12   6   20.46    1.14
   0 -12   6   20.93    1.21
   0  12  -6   20.19    1.41
   0  12  -6   22.00    1.08
   0 -12   6   21.73    1.35
   0 -12   6   21.13    1.48
   0  12  -6   20.79    1.35
   0  12  -6   20.93    1.61
   0 -12   5    0.07    0.40
   0 -12   5    0.67    0.47
   0  12  -5   -0.47    0.34
   0  12  -5    0.13    0.67
   0 -12   5    0.07    0.74
   0 -12   5    0.00    0.67
   0  12  -5    0.07    0.67
   0  12  -5   -0.13    0.94
   0 -12   4   44.95    2.02
   0 -12   4   50.94    2.22
   0  12  -4   46.77    2.36
   0  12  -4   46.50    1.95
   0  12  -4   48.38    1.95
   0  12  -4   48.25    2.29
   0 -12   3   30.75    1.55
   0 -12   3   31.56    1.48
   0  12  -3   32.84    1.41
   0  12  -3   30.41    1.75
   0 -12   3   34.05    1.75
   0 -12   3   31.63    1.61
   0  12  -3   30.35    1.88
   0  12  -3   36.40    1.68
   0 -12   2    3.77    0.54
   0 -12   2    4.24    0.54
   0  12  -2    3.90    0.40
   0  12  -2    4.64    0.74
   0 -12   2    3.90    0.81
   0 -12   2    4.51    0.81
   0  12  -2    3.90    1.01
   0  12  -2    5.05    0.81
   0 -12   1   -0.27    0.40
   0 -12   1    0.20    0.40
   0  12  -1    0.47    0.34
   0  12  -1   -0.61    0.54
   0 -12   1   -0.74    0.67
   0 -12   1    0.00    0.67
   0  12  -1    0.87    0.87
   0  12  -1    0.61    0.67
   0 -12   0  133.97    4.98
   0 -12   0  134.64    5.11
   0  12   0  137.00    5.32
   0  12   0  129.66    4.78
   0 -12   0  130.54    3.90
   0 -12   0  131.41    3.97
   0  12   0  129.80    4.10
   0  12   0  130.74    3.84
   0 -12  -1    5.52    0.61
   0 -12  -1    4.98    0.54
   0  12   1    5.52    0.47
   0  12   1    5.38    0.67
   0 -12  -1    5.45    0.87
   0 -12  -1    5.58    0.87
   0  12   1    4.51    0.81
   0  12   1    5.45    1.01
   0 -12  -2   59.28    2.49
   0 -12  -2   61.16    2.42
   0  12   2   61.97    2.42
   0  12   2   61.70    2.62
   0 -12  -2   62.04    2.42
   0 -12  -2   57.60    2.29
   0  12   2   54.91    2.09
   0  12   2   59.15    2.49
   0 -12  -3   55.31    2.22
   0 -12  -3   57.60    2.36
   0  12   3   56.93    2.22
   0  12   3   58.81    2.49
   0 -12  -3   56.79    2.29
   0 -12  -3   57.73    2.22
   0  12   3   50.13    2.29
   0  12   3   50.06    1.95
   0 -12  -4    0.00    0.34
   0 -12  -4    0.67    0.34
   0  12   4    0.13    0.27
   0  12   4   -0.07    0.47
   0 -12  -4    0.00    0.74
   0 -12  -4   -0.07    0.74
   0  12   4   -0.47    0.67
   0  12   4    1.55    0.87
   0 -12  -5   32.90    1.55
   0 -12  -5   33.04    1.41
   0  12   5   33.24    1.61
   0  12   5   36.13    1.55
   0 -12  -5   37.61    1.82
   0 -12  -5   35.06    1.82
   0  12   5   35.19    1.68
   0  12   5   34.32    1.95
   0 -12  -6   20.32    1.08
   0 -12  -6   23.35    1.08
   0  12   6   21.40    1.14
   0  12   6   23.55    1.08
   0 -12  -6   23.42    1.48
   0 -12  -6   25.50    1.55
   0  12   6   25.77    1.68
   0  12   6   24.63    1.41
   0 -12  -7   11.98    0.74
   0 -12  -7   11.44    0.81
   0  12   7   13.66    0.87
   0  12   7   12.04    0.74
   0 -12  -7   13.86    1.21
   0 -12  -7   11.24    1.21
   0 -12  -8    1.35    0.40
   0 -12  -8    0.61    0.40
   0  12   8    1.41    0.40
   0  12   8    1.48    0.47
   0 -12  -8    1.14    0.81
   0 -12  -8    0.67    0.81
   0  12   8    2.49    0.81
   0  12   8    1.08    0.94
   0 -12  -9    8.34    0.61
   0 -12  -9    7.33    0.61
   0  12   9    8.68    0.67
   0  12   9    8.75    0.67
   0 -12  -9    6.39    1.01
   0 -12  -9    8.21    1.01
   0  12   9    6.86    1.14
   0  12   9    6.19    0.94
   0 -12 -10    0.07    0.40
   0 -12 -10    0.81    0.40
   0  12  10    0.13    0.40
   0  12  10    0.54    0.40
   0 -12 -10    0.40    0.81
   0 -12 -10   -0.13    0.74
   0  12  10    0.81    0.74
   0  12  10   -0.20    0.87
   0 -12 -11   52.35    2.22
   0  12  11   54.50    2.29
   0  12  11   55.18    2.36
   0 -12 -11   59.68    2.56
   0 -12 -11   58.27    2.36
   0  12  11   60.69    2.69
   0  12  11   57.33    2.36
   0 -12 -12    1.01    0.40
   0  12  12    0.81    0.40
   0  12  12    1.55    0.54
   0 -12 -12    1.95    0.81
   0 -12 -12    0.67    0.87
   0  12  12    1.35    0.87
   0  12  12    2.29    0.87
   0  12  13   13.12    1.01
   0  12  13   13.52    0.87
   0 -12 -13   12.99    1.28
   0  12  13    8.41    1.55
   0  12  13   11.78    1.28
   0  12  14    1.28    0.40
   0  12  14    1.21    0.61
   0 -12 -14    0.54    0.94
   0  12  15    7.87    0.94
   0 -12 -15    7.54    1.14
   0 -12 -15    6.73    1.14
   0  12  15    8.21    1.14
   0  12  15    7.20    1.28
   0 -12 -16    0.34    0.40
   0 -12 -16    1.28    0.94
   0 -12 -16    0.20    0.87
   0  12  16   -0.94    0.87
   0  12  16    0.34    0.94
   0  12  17    0.40    0.61
   0  12  17    1.14    0.40
   0 -12 -17    1.14    1.01
   0 -12 -17    1.55    0.94
   0  12  17    1.68    1.01
   0  12  17    1.21    1.01
   0 -12 -18    0.20    0.20
   0 -12 -18    1.08    0.40
   0  12  18    0.40    0.40
   0  12  18    0.40    0.61
   0 -12 -18   -1.95    1.08
   0  12  18    0.27    0.87
   0  12  18    1.28    1.01
   0  12  19    4.78    0.61
   0  12  19    4.17    0.81
   0 -12 -19    3.30    1.08
   0 -12 -19    3.57    1.14
   0  12  19    3.97    1.21
   0  12  19    3.84    1.21
   0  12  20    2.22    0.54
   0  12  20    2.69    0.74
   0 -12 -20    1.95    1.08
   0 -12 -20    2.69    1.14
   0  12  20    1.95    1.08
   0  12  20   -0.27    1.21
   0 -12 -21   -0.13    0.27
   0 -12 -21    0.00    0.54
   0  12  21    0.94    0.47
   0  12  21    0.61    0.61
   0 -12 -21   -1.35    1.08
   0 -12 -21    0.94    1.01
   0  12  21    0.54    1.01
   0  12  21   -0.20    1.01
   0 -12 -22   -0.07    0.20
   0 -12 -22    1.01    0.67
   0  12  22    0.67    0.61
   0  12  22    1.48    0.61
   0 -12 -22   -0.34    1.08
   0 -12 -22    1.14    1.08
   0  12  22    1.14    1.14
   0  12  22    2.15    1.14
   0 -13  16    0.13    0.94
   0 -13  16   -0.61    0.74
   0 -13  15    8.21    1.01
   0 -13  15    8.55    1.21
   0 -13  14    4.84    0.74
   0 -13  14    4.17    0.61
   0  13 -14    3.57    0.87
   0  13 -14    5.52    0.67
   0 -13  14    4.71    1.14
   0 -13  14    5.25    0.87
   0  13 -14    5.79    1.28
   0  13 -14    7.94    1.14
   0 -13  13   10.30    0.87
   0 -13  13    9.76    0.94
   0  13 -13    8.55    1.08
   0  13 -13    9.96    0.81
   0 -13  13    8.95    1.01
   0 -13  13    9.35    1.14
   0  13 -13   11.04    1.14
   0  13 -13    9.49    1.41
   0 -13  12    5.05    0.67
   0 -13  12    4.58    0.74
   0  13 -12    5.18    0.61
   0  13 -12    3.36    0.87
   0 -13  12    4.64    0.87
   0 -13  12    4.91    1.08
   0  13 -12    6.53    1.28
   0  13 -12    4.58    1.01
   0 -13  11    2.49    0.61
   0 -13  11    2.56    0.54
   0  13 -11    2.76    0.81
   0  13 -11    2.42    0.47
   0 -13  11    2.76    0.81
   0 -13  11    3.77    1.01
   0  13 -11    3.03    1.14
   0  13 -11    3.30    0.94
   0 -13  10    0.40    0.54
   0 -13  10    0.47    0.40
   0  13 -10    0.27    0.40
   0  13 -10    0.13    0.67
   0 -13  10    0.34    0.81
   0 -13  10   -0.13    0.61
   0  13 -10   -0.94    0.81
   0  13 -10    0.54    1.01
   0 -13   9   11.30    0.87
   0 -13   9   10.77    0.94
   0  13  -9   11.57    0.81
   0  13  -9   10.16    1.08
   0 -13   9    9.55    1.01
   0 -13   9   11.04    1.21
   0  13  -9    8.95    1.35
   0  13  -9   10.09    1.14
   0 -13   8   52.75    2.36
   0 -13   8   53.76    2.42
   0  13  -8   55.71    2.29
   0  13  -8   51.27    2.56
   0 -13   8   53.96    2.29
   0 -13   8   53.90    2.36
   0  13  -8   57.53    2.83
   0  13  -8   49.99    2.15
   0 -13   7    2.96    0.54
   0  13  -7    2.83    0.74
   0  13  -7    2.29    0.47
   0 -13   7    4.10    0.94
   0 -13   7    3.43    0.87
   0  13  -7    3.30    0.87
   0  13  -7    2.29    1.14
   0 -13   6    1.21    0.54
   0  13  -6    2.22    0.40
   0 -13   6    2.36    0.87
   0 -13   6    1.75    0.81
   0  13  -6    1.95    0.81
   0  13  -6    2.42    1.14
   0 -13   5    3.10    0.61
   0 -13   5    4.17    0.61
   0  13  -5    4.31    0.87
   0  13  -5    3.43    0.47
   0 -13   5    3.57    0.94
   0 -13   5    3.23    0.81
   0  13  -5    5.18    1.14
   0  13  -5    2.89    0.81
   0 -13   4    0.94    0.47
   0 -13   4    0.94    0.47
   0  13  -4    1.21    0.67
   0  13  -4    0.47    0.34
   0 -13   4    1.68    0.74
   0 -13   4    0.20    0.81
   0  13  -4    0.20    1.01
   0  13  -4    1.28    0.74
   0 -13   3   10.30    0.74
   0 -13   3   11.24    0.87
   0  13  -3   10.70    0.67
   0  13  -3   11.84    1.14
   0  13  -3    9.15    1.28
   0  13  -3   10.50    1.08
   0 -13   2   19.58    1.08
   0 -13   2   17.97    1.14
   0  13  -2   19.98    1.01
   0  13  -2   16.69    1.28
   0 -13   2   19.38    1.35
   0 -13   2   20.39    1.35
   0  13  -2   20.32    1.61
   0  13  -2   17.23    1.21
   0 -13   1    1.68    0.47
   0 -13   1    1.48    0.47
   0  13  -1    1.68    0.40
   0  13  -1    0.67    0.61
   0 -13   1    1.21    0.74
   0 -13   1   -0.20    0.74
   0  13  -1    1.75    0.74
   0  13  -1    1.41    1.01
   0 -13   0   12.92    0.81
   0 -13   0   12.72    0.94
   0  13   0   13.79    1.14
   0  13   0   12.92    0.74
   0 -13   0   14.00    1.21
   0 -13   0   12.45    1.21
   0  13   0   12.58    1.35
   0  13   0   11.51    1.08
   0 -13  -1    3.63    0.47
   0 -13  -1    3.10    0.54
   0  13   1    3.70    0.40
   0  13   1    3.70    0.67
   0 -13  -1    4.24    0.87
   0 -13  -1    4.44    0.87
   0  13   1    4.17    1.01
   0  13   1    4.24    0.81
   0 -13  -2   38.15    1.68
   0 -13  -2   33.78    1.68
   0  13   2   38.69    1.61
   0  13   2   38.89    1.95
   0  13   2   38.15    1.75
   0  13   2   37.68    2.09
   0 -13  -3    0.81    0.40
   0 -13  -3    0.94    0.40
   0  13   3    1.14    0.54
   0  13   3    1.68    0.34
   0 -13  -3    1.35    0.81
   0 -13  -3    0.67    0.81
   0  13   3    1.21    0.74
   0  13   3    1.48    0.94
   0 -13  -4    3.36    0.54
   0 -13  -4    3.50    0.47
   0  13   4    3.16    0.40
   0  13   4    3.97    0.61
   0 -13  -4    2.69    0.87
   0 -13  -4    3.50    0.87
   0  13   4    4.24    1.08
   0  13   4    4.64    0.81
   0 -13  -5    8.41    0.67
   0 -13  -5    7.54    0.61
   0  13   5    9.02    0.61
   0  13   5    8.28    0.81
   0 -13  -5    7.20    1.08
   0 -13  -5    9.42    1.01
   0  13   5    8.55    1.01
   0  13   5    7.60    1.21
   0 -13  -6   14.94    0.81
   0 -13  -6   15.34    0.94
   0  13   6   16.75    0.87
   0  13   6   16.96    1.08
   0 -13  -6   19.31    1.48
   0 -13  -6   18.24    1.28
   0  13   6   19.38    1.61
   0  13   6   19.04    1.28
   0 -13  -7    9.22    0.67
   0 -13  -7    8.34    0.67
   0  13   7    9.15    0.81
   0  13   7    9.62    0.67
   0 -13  -7   10.09    1.08
   0 -13  -7    8.61    1.14
   0  13   7   10.36    1.08
   0  13   7    9.02    1.28
   0 -13  -8   36.47    1.61
   0 -13  -8   39.43    1.75
   0  13   8   38.29    1.75
   0  13   8   38.83    1.68
   0 -13  -8   33.17    1.88
   0 -13  -8   35.53    1.82
   0  13   8   36.07    1.82
   0  13   8   37.82    2.15
   0 -13  -9    0.74    0.40
   0 -13  -9    0.40    0.40
   0  13   9    0.61    0.47
   0  13   9    1.35    0.47
   0 -13  -9    0.34    0.81
   0 -13  -9    0.87    0.74
   0  13   9    0.07    0.94
   0  13   9    1.28    0.74
   0 -13 -10    3.84    0.61
   0  13  10    5.58    0.61
   0  13  10    3.97    0.61
   0 -13 -10    6.26    1.01
   0 -13 -10    4.51    1.01
   0  13  10    4.04    0.94
   0  13  10    4.51    1.14
   0 -13 -11   -0.20    0.40
   0 -13 -11    0.00    0.40
   0  13  11    0.20    0.40
   0  13  11    0.47    0.54
   0 -13 -11    0.00    0.81
   0  13  11   -1.21    0.81
   0  13  11   -0.74    1.14
   0 -13 -12   16.22    1.01
   0 -13 -12   17.02    1.01
   0  13  12   16.82    1.14
   0  13  12   16.35    1.01
   0 -13 -13    4.84    0.61
   0 -13 -13    4.58    0.61
   0  13  13    4.84    0.61
   0  13  13    3.84    0.67
   0 -13 -13    5.25    1.08
   0 -13 -13    4.91    1.01
   0  13  13    3.97    1.01
   0  13  13    4.98    1.14
   0  13  14   28.26    1.75
   0 -13 -14   40.78    2.22
   0 -13 -14   36.40    2.02
   0  13  14   35.12    2.22
   0  13  14   33.98    2.02
   0 -13 -15    2.09    0.47
   0  13  15    1.61    0.54
   0 -13 -15    2.56    0.94
   0 -13 -15    1.48    0.94
   0  13  15    1.41    1.08
   0  13  15    1.61    0.94
   0 -13 -16    1.35    0.47
   0 -13 -16    0.13    0.20
   0  13  16    1.61    0.40
   0  13  16    1.08    0.67
   0 -13 -16    0.47    0.87
   0 -13 -16    2.29    1.01
   0  13  16    1.55    1.01
   0  13  16    0.40    0.94
   0  13  17    2.29    0.74
   0  13  17    2.83    0.47
   0 -13 -17    1.68    1.08
   0 -13 -17    3.77    1.08
   0  13  17    1.14    1.01
   0  13  17    4.44    1.01
   0 -13 -18    0.47    0.47
   0 -13 -18   -0.07    0.27
   0  13  18    0.54    0.47
   0  13  18    0.61    0.67
   0 -13 -18    0.40    1.08
   0 -13 -18   -0.20    0.94
   0  13  18    1.35    1.01
   0  13  18    2.89    1.14
   0 -13 -19    0.13    0.47
   0 -13 -19    0.07    0.27
   0  13  19    0.13    0.47
   0  13  19   -0.40    0.61
   0 -13 -19    1.68    1.08
   0 -13 -19    1.88    1.01
   0  13  19   -0.47    1.01
   0  13  19   -0.67    0.94
   0 -13 -20    0.07    0.27
   0 -13 -20    1.21    0.54
   0  13  20    1.88    0.54
   0  13  20    0.67    0.61
   0 -13 -20    1.95    1.14
   0 -13 -20    0.74    1.01
   0  13  20    1.28    1.14
   0  13  21    1.21    0.54
   0  13  21    0.74    0.67
   0 -13 -21    0.87    1.08
   0  13  21    1.82    1.14
   0 -13 -22    0.07    0.20
   0 -14  15   -0.20    0.67
   0 -14  15   -0.20    0.94
   0 -14  14    0.27    0.87
   0 -14  14    0.87    0.67
   0  14 -14    0.34    1.01
   0  14 -14    0.27    0.94
   0 -14  13    3.70    0.81
   0 -14  13    4.17    0.81
   0 -14  13    5.52    1.14
   0  14 -13    3.43    1.35
   0  14 -13    3.30    1.08
   0 -14  12    1.35    0.61
   0 -14  12    1.35    0.47
   0  14 -12   -0.54    0.67
   0  14 -12    1.55    0.47
   0 -14  12    0.61    0.74
   0 -14  12    0.94    0.87
   0  14 -12    0.94    1.08
   0  14 -12    0.94    0.81
   0 -14  11    6.46    0.81
   0 -14  11    6.19    0.74
   0  14 -11    6.06    0.61
   0  14 -11    5.92    1.01
   0 -14  11    6.33    0.94
   0 -14  11    6.59    1.08
   0  14 -11    6.19    1.01
   0  14 -11    5.32    1.35
   0 -14  10    2.09    0.54
   0 -14  10    2.22    0.61
   0  14 -10    2.09    0.81
   0  14 -10    2.29    0.47
   0 -14  10    2.36    0.74
   0 -14  10    1.01    0.94
   0  14 -10    0.67    1.08
   0  14 -10    1.75    0.94
   0 -14   9    2.42    0.54
   0 -14   9    2.62    0.61
   0  14  -9    3.36    0.47
   0  14  -9    2.76    0.81
   0 -14   9    2.42    0.94
   0 -14   9    2.15    0.74
   0 -14   8    1.68    0.54
   0 -14   8    1.28    0.47
   0  14  -8    2.02    0.40
   0  14  -8    1.08    0.67
   0 -14   8    1.01    0.81
   0 -14   8    1.48    0.94
   0  14  -8    0.74    1.21
   0  14  -8    2.22    0.94
   0 -14   7   -0.07    0.40
   0 -14   7    0.67    0.47
   0  14  -7    0.74    0.67
   0  14  -7    0.13    0.34
   0 -14   7   -0.27    0.74
   0 -14   7   -0.67    0.87
   0  14  -7    0.54    0.81
   0  14  -7    0.61    1.08
   0 -14   6   14.47    1.01
   0 -14   6   16.62    1.08
   0  14  -6   13.79    1.21
   0  14  -6   15.21    0.87
   0  14  -6   15.54    1.28
   0  14  -6   10.97    1.55
   0 -14   5    5.92    0.74
   0 -14   5    5.25    0.67
   0  14  -5    7.00    1.01
   0  14  -5    5.32    0.54
   0 -14   5    7.13    1.01
   0 -14   5    5.99    1.01
   0  14  -5    6.53    1.35
   0  14  -5    8.28    1.08
   0 -14   4    6.86    1.01
   0 -14   4    5.45    0.94
   0  14  -4    5.99    0.94
   0  14  -4    7.67    1.35
   0 -14   3    1.14    0.47
   0 -14   3    2.02    0.54
   0  14  -3    1.55    0.40
   0  14  -3    0.20    0.74
   0 -14   3    1.75    0.81
   0 -14   3    1.21    0.87
   0  14  -3    1.41    0.74
   0  14  -3    0.67    1.08
   0 -14   2    0.81    0.47
   0 -14   2    1.55    0.47
   0  14  -2    1.28    0.40
   0  14  -2    1.82    0.74
   0  14  -2    1.82    0.74
   0  14  -2    0.87    1.01
   0 -14   1    1.61    0.47
   0 -14   1    1.41    0.47
   0  14  -1    1.95    0.67
   0  14  -1    1.88    0.40
   0 -14   1    3.77    0.94
   0 -14   1    2.22    0.81
   0  14  -1    2.83    1.14
   0  14  -1    2.56    0.81
   0 -14   0    8.21    0.67
   0 -14   0    8.14    0.74
   0  14   0    9.02    1.01
   0  14   0    7.60    0.61
   0 -14   0    8.95    1.08
   0 -14   0    7.07    1.08
   0  14   0    9.08    1.01
   0  14   0    5.32    1.28
   0 -14  -1   18.77    1.01
   0 -14  -1   19.58    1.14
   0  14   1   19.98    1.01
   0  14   1   17.97    1.28
   0 -14  -1   18.10    1.48
   0 -14  -1   18.24    1.35
   0  14   1   18.24    1.28
   0  14   1   20.46    1.68
   0 -14  -2    2.89    0.54
   0 -14  -2    3.03    0.47
   0  14   2    1.41    0.61
   0  14   2    3.36    0.40
   0 -14  -2    1.55    0.87
   0 -14  -2    2.96    0.87
   0  14   2    0.87    1.01
   0  14   2    3.16    0.81
   0 -14  -3    0.47    0.40
   0 -14  -3    0.27    0.34
   0  14   3    0.40    0.34
   0  14   3    0.40    0.54
   0 -14  -3    1.68    0.74
   0 -14  -3    1.35    0.87
   0  14   3    0.74    0.67
   0  14   3    0.87    0.94
   0 -14  -4   -0.07    0.34
   0 -14  -4    0.87    0.47
   0  14   4    0.67    0.54
   0  14   4    0.40    0.34
   0 -14  -4    0.00    0.81
   0 -14  -4    1.35    0.74
   0  14   4   -0.13    0.67
   0  14   4   -0.20    0.94
   0 -14  -5    2.09    0.40
   0 -14  -5    1.88    0.47
   0  14   5    2.36    0.61
   0  14   5    1.82    0.40
   0 -14  -5    3.84    0.94
   0 -14  -5    2.02    0.81
   0  14   5    1.01    1.01
   0  14   5    2.49    0.81
   0 -14  -6    1.82    0.40
   0 -14  -6    1.61    0.47
   0  14   6    1.82    0.61
   0  14   6    2.15    0.40
   0 -14  -6    2.76    0.87
   0 -14  -6    1.21    0.87
   0  14   6    2.15    0.81
   0  14   6    2.29    1.08
   0 -14  -7    6.80    0.61
   0 -14  -7    7.33    0.74
   0  14   7    7.00    0.74
   0  14   7    7.47    0.61
   0 -14  -7    6.93    1.08
   0 -14  -7    8.48    1.08
   0  14   7    7.67    1.01
   0  14   7    7.33    1.28
   0 -14  -8    0.87    0.40
   0 -14  -8    1.82    0.47
   0  14   8    1.61    0.47
   0  14   8    2.56    0.47
   0 -14  -8    1.21    0.94
   0 -14  -8    1.68    0.81
   0  14   8    0.20    1.01
   0  14   8    1.95    0.81
   0 -14  -9    0.61    0.47
   0  14   9    0.61    0.47
   0  14   9    1.14    0.47
   0 -14 -10    4.44    0.61
   0 -14 -10    3.84    0.54
   0  14  10    3.84    0.61
   0  14  10    3.36    0.61
   0 -14 -10    3.03    1.01
   0  14  10    4.31    1.21
   0 -14 -11   15.68    1.01
   0 -14 -11   13.39    0.87
   0  14  11   15.54    1.01
   0  14  11   13.59    1.01
   0  14  11   12.25    1.28
   0  14  11   12.52    1.61
   0 -14 -12    2.02    0.54
   0  14  12    2.56    0.67
   0  14  12    1.28    0.47
   0 -14 -12    1.48    0.87
   0 -14 -12    1.28    0.81
   0  14  12    2.42    0.87
   0  14  12    0.61    1.01
   0 -14 -13    0.40    0.81
   0 -14 -13   -0.61    0.74
   0  14  13    0.20    1.01
   0  14  13   -0.87    0.81
   0 -14 -14    2.76    0.61
   0 -14 -14    3.10    0.54
   0  14  14    3.30    0.74
   0  14  14    2.09    0.54
   0 -14 -14    3.63    0.94
   0 -14 -14    3.36    1.08
   0  14  14    2.42    1.01
   0  14  14    1.08    1.21
   0 -14 -15    0.07    0.34
   0 -14 -15    0.67    0.47
   0  14  15    0.87    0.61
   0  14  15    0.20    0.47
   0 -14 -15   -0.20    0.94
   0 -14 -15    0.20    0.81
   0  14  15    0.87    0.87
   0  14  15   -1.01    1.01
   0 -14 -16   -0.67    0.40
   0 -14 -16    0.07    0.27
   0  14  16   -0.13    0.40
   0  14  16   -0.20    0.61
   0 -14 -16   -0.47    0.94
   0 -14 -16   -1.48    0.87
   0  14  16    0.94    1.01
   0  14  16    0.07    0.81
   0  14  17    2.62    0.54
   0  14  17    1.21    0.74
   0 -14 -17    1.41    0.94
   0 -14 -17    4.71    1.08
   0  14  17    2.22    1.08
   0  14  17    1.48    1.14
   0  14  18    1.28    0.67
   0  14  18    1.75    0.54
   0 -14 -18    1.14    1.01
   0 -14 -18    1.08    1.01
   0  14  18    1.28    1.08
   0  14  18    3.03    1.08
   0 -14 -19    1.41    0.54
   0 -14 -19   -0.20    0.27
   0  14  19    0.61    0.61
   0  14  19    0.94    0.47
   0 -14 -19    1.28    1.28
   0 -14 -19    1.68    1.08
   0  14  19    0.40    1.08
   0  14  19    1.61    1.01
   0  14  20    1.08    0.67
   0  14  20    3.36    0.67
   0 -14 -21   -0.13    0.27
   0  14  21   -0.13    0.61
   0  14  21    0.40    0.54
   0 -15  14   -0.67    0.74
   0 -15  14    0.27    0.94
   0 -15  13   -0.67    0.67
   0 -15  13    1.28    0.87
   0  15 -13   -0.54    0.94
   0  15 -13   -0.67    1.01
   0 -15  12    0.61    0.94
   0 -15  12    0.54    0.67
   0  15 -12    0.47    0.94
   0  15 -12    1.88    1.14
   0 -15  11    2.56    0.61
   0 -15  11    3.30    0.67
   0  15 -11    1.82    0.81
   0  15 -11    2.62    0.47
   0 -15  11    2.22    0.81
   0 -15  11    3.90    1.08
   0  15 -11    2.15    1.08
   0  15 -11    1.14    1.14
   0 -15  10    3.10    0.61
   0 -15  10    3.10    0.61
   0  15 -10    1.61    0.81
   0  15 -10    2.83    0.47
   0 -15  10    3.43    1.08
   0 -15  10    3.16    0.81
   0  15 -10    1.88    0.87
   0  15 -10    1.95    1.21
   0 -15   9    4.17    0.67
   0 -15   9    3.30    0.61
   0  15  -9    3.43    0.87
   0  15  -9    3.63    0.47
   0 -15   9    1.88    1.08
   0 -15   9    4.04    0.87
   0  15  -9    1.28    1.21
   0  15  -9    3.23    0.94
   0 -15   8    1.01    0.47
   0 -15   8    0.61    0.54
   0  15  -8    1.28    0.40
   0  15  -8   -0.54    0.67
   0 -15   8    0.74    0.81
   0 -15   8    1.28    0.94
   0  15  -8    0.81    0.87
   0  15  -8   -0.81    1.21
   0 -15   7    5.65    0.67
   0 -15   7    5.85    0.74
   0  15  -7    5.45    0.54
   0  15  -7    5.52    0.94
   0 -15   7    6.80    1.14
   0 -15   7    5.92    1.01
   0  15  -7    5.72    1.08
   0  15  -7    6.93    1.41
   0 -15   6   -0.20    0.47
   0 -15   6    0.61    0.47
   0  15  -6    0.67    0.67
   0  15  -6    0.87    0.40
   0 -15   6    0.20    0.87
   0 -15   6    0.81    0.81
   0  15  -6    1.08    1.08
   0  15  -6    1.82    0.81
   0 -15   5    4.44    0.67
   0 -15   5    5.05    0.61
   0  15  -5    4.10    0.87
   0  15  -5    3.84    0.47
   0 -15   5    4.71    1.01
   0 -15   5    4.58    1.01
   0  15  -5    5.52    0.94
   0  15  -5    6.86    1.41
   0 -15   4   11.91    0.87
   0 -15   4   11.10    0.94
   0  15  -4   12.25    0.81
   0  15  -4   12.78    1.28
   0 -15   4   11.24    1.28
   0 -15   4   14.47    1.35
   0  15  -4   14.20    1.21
   0  15  -4   12.52    1.61
   0 -15   3    2.42    0.54
   0 -15   3    2.15    0.61
   0  15  -3    2.89    0.87
   0  15  -3    2.96    0.47
   0 -15   3    2.49    0.87
   0 -15   3    1.82    0.94
   0  15  -3    2.09    1.14
   0  15  -3    3.16    0.87
   0 -15   2    1.75    0.54
   0 -15   2    1.75    0.54
   0  15  -2    1.14    0.81
   0  15  -2    1.82    0.40
   0 -15   2    3.97    0.94
   0 -15   2    1.75    0.87
   0  15  -2    1.95    1.14
   0  15  -2    1.68    0.81
   0 -15   1    4.51    1.01
   0  15  -1    2.69    0.81
   0  15  -1    2.36    1.14
   0 -15   0    7.74    0.67
   0 -15   0   11.91    1.28
   0 -15   0    8.95    1.08
   0  15   0    9.62    1.01
   0  15   0   11.84    1.55
   0 -15  -1    0.47    0.47
   0 -15  -1    0.87    0.40
   0  15   1    0.40    0.67
   0  15   1    0.40    0.34
   0 -15  -1    1.68    0.87
   0 -15  -1    0.00    0.81
   0  15   1   -0.40    1.08
   0  15   1    1.21    0.74
   0 -15  -2   -0.20    0.40
   0 -15  -2    0.87    0.47
   0  15   2    0.40    0.61
   0  15   2    0.27    0.34
   0 -15  -2   -0.27    0.74
   0 -15  -2   -0.40    0.87
   0  15   2    0.47    0.74
   0  15   2   -0.40    1.01
   0 -15  -3    0.47    0.34
   0 -15  -3   -0.34    0.40
   0  15   3    0.27    0.61
   0  15   3   -0.27    0.34
   0 -15  -3    0.61    0.94
   0 -15  -3   -0.87    0.74
   0  15   3    0.20    1.01
   0  15   3    0.20    0.74
   0 -15  -4    2.09    0.47
   0 -15  -4    0.81    0.40
   0  15   4    1.48    0.34
   0  15   4    1.82    0.61
   0 -15  -4    1.68    0.94
   0 -15  -4    0.87    0.81
   0  15   4    0.47    1.08
   0  15   4    2.76    0.81
   0 -15  -5    1.01    0.40
   0 -15  -5    1.21    0.47
   0  15   5    0.81    0.61
   0  15   5    0.74    0.34
   0 -15  -5   -0.54    0.94
   0 -15  -5   -0.07    0.81
   0  15   5    0.27    0.74
   0 -15  -6   11.04    0.74
   0 -15  -6    9.96    0.81
   0  15   6    9.69    0.87
   0  15   6   10.23    0.74
   0 -15  -7    3.16    0.54
   0  15   7    2.83    0.47
   0  15   7    2.15    0.61
   0 -15  -7    0.47    0.94
   0  15   7    1.68    1.14
   0 -15  -8    1.28    0.47
   0  15   8    1.68    0.40
   0  15   8    0.40    0.54
   0 -15  -8    1.41    0.81
   0 -15  -8    1.95    0.94
   0  15   8    0.94    0.94
   0  15   8    1.35    0.81
   0 -15  -9    0.00    0.40
   0  15   9    0.40    0.54
   0  15   9    0.27    0.47
   0 -15  -9    0.00    0.87
   0 -15  -9    0.87    0.74
   0  15   9   -0.13    0.74
   0  15   9   -0.40    0.94
   0 -15 -10    0.20    0.67
   0 -15 -10   -0.07    0.87
   0  15  10    0.40    0.74
   0  15  10    0.13    1.01
   0 -15 -11    5.92    0.74
   0  15  11    3.43    0.74
   0 -15 -11    4.98    0.94
   0 -15 -11    2.89    1.08
   0  15  11    5.85    1.28
   0  15  11    4.31    0.94
   0 -15 -12   -0.20    0.47
   0 -15 -12    0.20    0.47
   0  15  12    0.07    0.54
   0 -15 -12   -0.20    0.87
   0 -15 -12    0.00    0.74
   0  15  12    0.54    1.08
   0  15  12   -0.81    0.81
   0 -15 -13    1.48    0.47
   0 -15 -13    1.48    0.54
   0  15  13    2.29    0.54
   0  15  13    1.82    0.61
   0 -15 -13    0.87    0.94
   0 -15 -13    2.09    0.81
   0  15  13    2.83    0.87
   0  15  13    1.01    1.14
   0 -15 -14   -0.27    0.47
   0 -15 -14    0.54    0.47
   0  15  14    0.87    0.61
   0  15  14    0.74    0.47
   0 -15 -14    0.81    0.81
   0 -15 -14    0.20    0.87
   0  15  14    0.00    1.08
   0  15  14    1.01    0.94
   0 -15 -15   -0.07    0.40
   0 -15 -15   -0.47    0.47
   0  15  15    0.07    0.61
   0  15  15    0.34    0.40
   0 -15 -15    0.13    0.87
   0 -15 -15   -0.07    0.87
   0  15  15   -0.34    0.87
   0  15  15    0.54    1.01
   0 -15 -16    0.87    0.47
   0 -15 -16    0.87    0.54
   0  15  16    0.54    0.67
   0  15  16    0.81    0.47
   0 -15 -16    0.13    0.94
   0 -15 -16   -1.21    0.81
   0  15  16    0.13    1.01
   0  15  16    1.68    1.01
   0 -15 -17    0.00    0.47
   0 -15 -17   -0.13    0.27
   0  15  17   -0.27    0.67
   0  15  17   -0.13    0.47
   0 -15 -17   -0.34    0.94
   0 -15 -17    1.35    0.94
   0  15  17    0.07    1.01
   0  15  17    0.54    0.94
   0 -15 -18    0.00    0.27
   0 -15 -18    0.07    0.54
   0  15  18    0.81    0.61
   0  15  18   -0.20    0.47
   0 -15 -18   -1.08    0.87
   0  15  18   -0.34    0.94
   0  15  18    0.27    1.01
   0 -15 -19    0.47    0.27
   0 -15 -19   -0.13    0.54
   0  15  19    0.07    0.47
   0  15  19   -0.40    0.61
   0 -15 -20    0.81    0.61
   0 -15 -20    0.13    0.27
   0  15  20    0.13    0.61
   0  15  20    0.00    0.54
   0 -16  12    0.27    0.81
   0 -16  12    1.14    1.08
   0  16 -12    1.68    1.01
   0  16 -11   -0.07    1.01
   0 -16   9    4.71    0.67
   0 -16   9    5.05    0.67
   0  16  -9    3.36    0.87
   0  16  -9    4.64    0.54
   0 -16   8   -0.40    0.47
   0 -16   8    0.27    0.47
   0  16  -8   -0.07    0.34
   0  16  -8   -0.27    0.67
   0  16  -8    0.34    0.94
   0 -16   7    3.10    0.61
   0 -16   7    4.37    0.67
   0  16  -7    3.03    0.47
   0  16  -7    2.96    0.81
   0 -16   7    2.36    1.08
   0 -16   7    2.15    0.94
   0  16  -7    2.62    1.01
   0 -16   6    0.47    0.47
   0 -16   6    0.74    0.47
   0  16  -6    1.14    0.74
   0  16  -6    0.47    0.34
   0 -16   6    0.20    0.87
   0 -16   6    1.88    0.94
   0  16  -6    0.27    0.87
   0 -16   5    6.80    0.67
   0 -16   5    5.11    0.74
   0  16  -5    4.51    0.94
   0  16  -5    4.64    0.54
   0 -16   5    5.92    1.08
   0 -16   5    3.77    1.08
   0  16  -5    6.12    1.08
   0  16  -5    1.75    1.48
   0 -16   4    1.68    0.47
   0 -16   4    2.15    0.61
   0  16  -4    1.48    0.40
   0  16  -4    1.55    0.87
   0 -16   4   -0.40    0.87
   0 -16   4    2.42    1.01
   0  16  -4    2.56    0.94
   0 -16   3    8.61    0.74
   0 -16   3    9.02    0.94
   0  16  -3    6.86    1.08
   0  16  -3    8.61    0.67
   0 -16   3    9.15    1.28
   0 -16   3   10.16    1.21
   0  16  -3    9.89    1.14
   0 -16   2    1.01    0.54
   0 -16   2    1.68    0.47
   0  16  -2    1.55    0.81
   0  16  -2    0.87    0.40
   0 -16   2    0.94    0.87
   0 -16   2    0.20    0.87
   0  16  -2    0.61    0.81
   0 -16   1    3.10    0.47
   0 -16   1    1.95    0.54
   0  16  -1    3.10    0.81
   0  16  -1    2.02    0.40
   0 -16   1    1.08    0.94
   0  16  -1    2.89    0.87
   0 -16   0    3.84    0.67
   0 -16   0    4.17    0.54
   0  16   0    3.97    0.94
   0  16   0    4.98    0.47
   0  16   0    4.64    1.01
   0 -16  -1    3.10    0.47
   0 -16  -1    2.69    0.61
   0  16   1    3.43    0.81
   0  16   1    2.15    0.40
   0 -16  -2    0.74    0.40
   0 -16  -2    0.81    0.47
   0  16   2    0.47    0.34
   0  16   2    0.61    0.67
   0  16   2    0.74    1.28
   0 -16  -3    5.79    0.74
   0 -16  -3    5.99    0.67
   0  16   3    5.92    0.54
   0  16   3    6.80    0.94
   0 -16  -3    6.26    1.28
   0  16   3    6.66    1.41
   0 -16  -4    3.57    0.67
   0  16   4    2.49    0.47
   0  16   4    3.30    0.81
   0 -16  -4    3.70    0.94
   0 -16  -4    3.10    1.14
   0  16   4    2.62    1.14
   0  16   4    2.96    0.94
   0 -16  -5    6.19    0.74
   0  16   5    4.71    0.81
   0  16   5    3.90    0.54
   0 -16  -5    3.50    1.14
   0 -16  -5    6.53    1.01
   0  16   5    4.44    1.28
   0  16   5    5.38    0.94
   0 -16  -6   10.16    1.35
   0 -16  -6   11.44    1.21
   0 -16  -7    2.22    0.54
   0 -16  -7    1.35    0.47
   0  16   7    1.68    0.61
   0  16   7    1.48    0.47
   0 -16  -7    0.47    0.87
   0 -16  -7    1.35    0.87
   0 -16  -8    3.57    0.61
   0 -16  -8    4.37    0.54
   0  16   8    2.62    0.67
   0  16   8    3.70    0.54
   0 -16  -8    5.58    0.94
   0 -16  -8    2.83    1.01
   0  16   8    4.71    0.94
   0  16   8    3.97    1.21
   0 -16  -9    0.20    0.47
   0 -16  -9    0.81    0.47
   0  16   9    0.74    0.54
   0  16   9    0.40    0.47
   0 -16  -9    0.61    0.87
   0 -16  -9   -0.27    0.74
   0  16   9   -0.20    0.67
   0  16   9   -0.20    1.08
   0 -16 -10    0.87    0.47
   0 -16 -10    1.28    0.47
   0  16  10    1.01    0.54
   0 -16 -10    1.68    0.81
   0 -16 -10    0.47    0.94
   0  16  10    1.08    1.14
   0  16  10    1.21    0.81
   0 -16 -11   -0.34    0.40
   0 -16 -11    0.54    0.47
   0  16  11    0.27    0.54
   0  16  11    0.07    0.61
   0 -16 -11    1.01    0.87
   0 -16 -11    1.14    0.81
   0  16  11    0.07    0.81
   0  16  11   -0.47    0.94
   0 -16 -12    0.61    0.47
   0 -16 -12    0.47    0.47
   0  16  12   -0.34    0.47
   0  16  12    0.61    0.54
   0 -16 -12    0.87    0.74
   0 -16 -12    0.54    0.94
   0  16  12    0.27    1.01
   0  16  12    0.27    0.81
   0 -16 -13    0.47    0.47
   0 -16 -13    0.27    0.47
   0  16  13   -0.07    0.47
   0  16  13   -0.47    0.61
   0 -16 -13   -1.55    0.87
   0 -16 -13    0.54    0.81
   0  16  13    0.34    1.01
   0  16  13   -0.67    0.81
   0 -16 -14    0.54    0.47
   0 -16 -14   -0.13    0.47
   0  16  14    0.47    0.47
   0  16  14    0.87    0.61
   0 -16 -14   -0.74    0.81
   0 -16 -14   -0.94    0.87
   0  16  14   -0.40    0.94
   0  16  14    0.07    0.81
   0 -16 -15    1.08    0.54
   0 -16 -15    0.81    0.47
   0  16  15    0.94    0.67
   0  16  15    1.08    0.47
   0 -16 -15    1.21    0.94
   0 -16 -15    0.07    0.81
   0  16  15   -1.14    0.94
   0  16  15   -0.87    0.87
   0 -16 -16    0.74    0.54
   0 -16 -16    0.47    0.54
   0  16  16    0.67    0.61
   0  16  16   -0.27    0.47
   0 -16 -16    0.61    0.94
   0 -16 -16    1.08    0.94
   0  16  16   -0.13    1.01
   0  16  16    0.67    1.01
   0 -16 -17    0.47    0.54
   0 -16 -17   -0.40    0.54
   0  16  17    0.20    0.61
   0  16  17   -0.47    0.47
   0 -16 -18    0.07    0.34
   0 -16 -18    0.00    0.61
   0  16  18    0.27    0.54
   0  16  18   -0.47    0.61
   0 -16 -19    0.13    0.27
   0  16  19   -0.13    0.61
   0  16  19   -0.40    0.54
   0 -17  10    0.00    0.74
   0 -17  10    0.27    1.01
   0  17 -10    0.13    0.94
   0  17 -10    2.09    1.08
   0 -17   9   -0.07    0.81
   0 -17   9    0.07    1.01
   0  17  -9    0.54    1.01
   0  17  -9    0.54    1.01
   0 -17   8    5.65    1.08
   0 -17   8    6.12    1.14
   0  17  -8    7.94    1.28
   0  17  -8    5.72    1.35
   0 -17   7    0.67    0.54
   0 -17   7    0.81    0.47
   0  17  -7    1.08    0.74
   0  17  -7    0.81    0.34
   0 -17   7    0.74    0.81
   0 -17   7    1.82    0.94
   0  17  -7    2.02    0.94
   0  17  -7   -0.61    1.14
   0 -17   6   -0.13    0.47
   0 -17   6   -0.13    0.47
   0  17  -6    1.01    0.74
   0  17  -6    0.13    0.40
   0 -17   6   -0.13    0.81
   0 -17   6    0.74    0.94
   0  17  -6   -0.07    1.14
   0  17  -6    0.13    0.87
   0 -17   5    1.55    0.54
   0 -17   5    1.95    0.54
   0  17  -5    1.55    0.81
   0  17  -5    1.48    0.40
   0 -17   5    2.29    0.94
   0 -17   5    2.22    1.01
   0  17  -5    0.27    1.21
   0  17  -5    1.41    0.87
   0 -17   4   -0.07    0.47
   0 -17   4    0.40    0.54
   0  17  -4    0.40    0.81
   0  17  -4    0.27    0.40
   0 -17   4   -0.20    0.94
   0 -17   4   -0.20    0.87
   0  17  -4   -0.87    1.14
   0  17  -4    0.20    0.87
   0 -17   3    5.65    0.61
   0 -17   3    5.99    0.81
   0  17  -3    5.99    0.61
   0  17  -3    3.57    0.94
   0 -17   3    5.11    1.08
   0 -17   3    7.07    1.21
   0  17  -3    6.46    1.08
   0  17  -3    7.74    1.48
   0 -17   2    3.84    0.54
   0 -17   2    3.30    0.67
   0  17  -2    3.84    0.94
   0  17  -2    4.10    0.47
   0 -17   2    4.10    1.01
   0 -17   2    4.71    1.08
   0  17  -2    5.11    1.41
   0  17  -2    4.71    0.94
   0 -17   1    0.13    0.40
   0 -17   1   -0.07    0.47
   0  17  -1    0.07    0.34
   0  17  -1    1.41    0.74
   0 -17   1    0.47    0.87
   0 -17   1   -0.13    0.87
   0  17  -1   -0.94    1.14
   0  17  -1   -0.87    0.81
   0 -17   0    0.00    0.40
   0 -17   0    0.40    0.47
   0  17   0    0.54    0.74
   0  17   0    0.47    0.34
   0 -17   0    1.28    0.87
   0 -17   0    1.08    0.87
   0  17   0    0.67    0.81
   0  17   0    0.61    1.14
   0 -17  -1    7.94    0.87
   0 -17  -1    8.68    0.67
   0  17   1    7.20    0.61
   0  17   1    6.86    1.08
   0 -17  -1    6.86    1.14
   0 -17  -1    9.08    1.35
   0  17   1    9.22    1.08
   0  17   1    8.75    1.55
   0 -17  -2    1.61    0.54
   0 -17  -2    0.61    0.40
   0  17   2    0.74    0.40
   0  17   2    0.07    0.74
   0 -17  -2    1.55    0.81
   0 -17  -2    1.28    0.94
   0  17   2    0.87    1.14
   0  17   2    0.67    0.81
   0 -17  -3    8.34    0.74
   0 -17  -3    9.29    0.87
   0  17   3    8.21    0.61
   0  17   3    7.94    1.01
   0 -17  -3    9.35    1.14
   0 -17  -3    9.22    1.41
   0  17   3    9.42    1.14
   0  17   3    7.74    1.48
   0 -17  -4    0.20    0.54
   0  17   4   -0.07    0.61
   0  17   4    0.13    0.34
   0 -17  -4    0.13    0.81
   0 -17  -4    1.08    1.01
   0  17   4    1.55    0.81
   0  17   4    1.08    1.08
   0 -17  -5    0.20    0.54
   0 -17  -5    0.34    0.40
   0  17   5    0.67    0.40
   0  17   5    0.81    0.67
   0 -17  -5    0.20    0.81
   0 -17  -5    0.40    1.01
   0  17   5   -0.34    1.08
   0  17   5    1.08    0.87
   0 -17  -6    1.14    0.40
   0 -17  -6    2.09    0.61
   0  17   6    2.22    0.47
   0  17   6    3.16    0.81
   0 -17  -6    1.08    0.81
   0 -17  -6    0.74    1.01
   0  17   6    2.62    1.28
   0  17   6    2.62    0.87
   0 -17  -7   10.30    0.94
   0 -17  -7    7.74    0.67
   0  17   7    6.93    0.67
   0  17   7   10.03    1.01
   0 -17  -7   10.03    1.14
   0 -17  -7    8.61    1.28
   0 -17  -8    0.81    0.40
   0 -17  -8    0.74    0.54
   0  17   8    0.67    0.40
   0  17   8    0.54    0.54
   0 -17  -8    0.61    0.81
   0 -17  -8    1.08    0.87
   0  17   8    0.94    0.74
   0  17   8   -0.87    1.14
   0 -17  -9    8.28    0.81
   0 -17  -9    8.14    0.74
   0  17   9    5.65    0.87
   0 -17  -9    7.74    1.08
   0 -17  -9    7.47    1.21
   0  17   9    5.85    1.08
   0  17   9    7.33    1.48
   0 -17 -10    4.71    0.67
   0 -17 -10    3.63    0.61
   0  17  10    4.51    0.74
   0  17  10    4.24    0.74
   0 -17 -10    4.98    0.94
   0 -17 -10    5.72    1.14
   0  17  10    3.23    0.94
   0  17  10    4.24    1.35
   0 -17 -11    1.41    0.54
   0 -17 -11    2.36    0.54
   0  17  11    0.81    0.61
   0  17  11    1.14    0.61
   0 -17 -11    2.49    0.87
   0 -17 -11    1.82    1.01
   0  17  11    1.55    0.87
   0  17  11    2.15    1.08
   0 -17 -12    0.07    0.47
   0 -17 -12    0.54    0.47
   0  17  12    0.07    0.54
   0  17  12    0.34    0.47
   0 -17 -12   -0.54    0.87
   0 -17 -12   -0.61    0.87
   0  17  12   -0.34    0.94
   0  17  12   -0.74    0.81
   0 -17 -13    1.14    0.54
   0 -17 -13    0.54    0.47
   0  17  13    1.08    0.54
   0  17  13    0.00    0.61
   0 -17 -13    0.34    0.87
   0 -17 -13    0.07    0.94
   0  17  13    1.08    0.94
   0  17  13    0.27    0.87
   0 -17 -14   -0.07    0.47
   0 -17 -14   -0.13    0.54
   0  17  14    0.40    0.54
   0  17  14   -0.20    0.47
   0 -17 -14    0.34    0.87
   0 -17 -14   -0.13    0.87
   0  17  14    0.34    0.87
   0  17  14    0.67    1.01
   0 -17 -15    1.08    0.54
   0 -17 -15   -0.07    0.47
   0  17  15    0.47    0.54
   0  17  15   -0.13    0.54
   0 -17 -16    0.74    0.61
   0 -17 -16    0.07    0.54
   0  17  16    0.81    0.61
   0  17  16    0.47    0.61
   0 -17 -17   -0.07    0.54
   0 -17 -17    0.07    0.61
   0  17  17    0.67    0.61
   0  17  17    1.21    0.54
   0 -18   8    0.07    1.01
   0 -18   8   -0.81    0.87
   0  18  -8    0.54    1.14
   0  18  -8    0.47    1.01
   0 -18   7    0.47    0.87
   0 -18   7   -1.08    0.94
   0  18  -7    0.13    1.01
   0  18  -7    0.34    1.08
   0 -18   6   -1.14    0.87
   0 -18   6    1.08    0.94
   0  18  -6   -0.34    1.14
   0  18  -6   -0.27    0.94
   0 -18   5    0.47    0.47
   0  18  -5    0.61    0.40
   0 -18   5    0.27    0.87
   0 -18   5    0.94    0.94
   0  18  -5    1.14    0.94
   0  18  -5   -0.27    1.14
   0 -18   4    2.56    0.67
   0 -18   4    3.10    0.54
   0  18  -4    2.36    0.47
   0  18  -4    2.96    0.87
   0 -18   4    2.83    1.01
   0 -18   4    4.24    1.01
   0  18  -4    1.55    1.28
   0  18  -4    2.76    1.01
   0 -18   3    0.27    0.47
   0 -18   3    0.74    0.54
   0  18  -3   -0.27    0.81
   0  18  -3    0.40    0.40
   0 -18   3    0.27    0.94
   0 -18   3   -0.34    0.81
   0  18  -3   -0.40    1.21
   0  18  -3    0.07    0.94
   0 -18   2    2.49    0.67
   0 -18   2    3.30    0.54
   0  18  -2    2.89    0.87
   0  18  -2    2.36    0.47
   0 -18   2    2.76    1.01
   0 -18   2    1.61    0.94
   0  18  -2    3.63    0.94
   0  18  -2    4.44    1.35
   0 -18   1   -0.07    0.40
   0 -18   1    0.40    0.54
   0  18  -1    0.20    0.34
   0  18  -1    0.47    0.74
   0 -18   1    0.27    0.87
   0 -18   1    0.20    0.87
   0  18  -1    1.48    1.14
   0  18  -1    0.87    0.81
   0 -18   0    3.43    0.54
   0 -18   0    2.69    0.67
   0  18   0    2.89    0.47
   0  18   0    3.43    0.87
   0 -18   0    4.31    1.08
   0 -18   0    3.97    1.01
   0 -18  -1   -0.20    0.47
   0 -18  -1    0.27    0.47
   0  18   1    0.40    0.40
   0  18   1   -0.81    0.74
   0 -18  -1    1.01    0.87
   0 -18  -1    1.01    0.87
   0  18   1   -1.28    0.81
   0  18   1   -0.34    1.21
   0 -18  -2    0.87    0.47
   0 -18  -2    0.20    0.61
   0  18   2   -1.08    0.67
   0  18   2    0.67    0.34
   0 -18  -2    0.34    0.81
   0 -18  -2   -0.61    0.87
   0  18   2    0.54    1.14
   0  18   2    0.00    0.81
   0 -18  -3   -0.54    0.40
   0 -18  -3    0.47    0.54
   0  18   3    1.08    0.74
   0  18   3    0.20    0.34
   0 -18  -3    0.27    0.81
   0 -18  -3   -1.55    0.94
   0  18   3   -1.68    1.08
   0  18   3    0.94    0.87
   0 -18  -4    1.21    0.54
   0 -18  -4    1.28    0.47
   0  18   4    2.09    0.74
   0  18   4    1.01    0.40
   0 -18  -4    2.36    1.14
   0 -18  -4   -0.07    0.74
   0  18   4    1.95    0.94
   0  18   4    1.28    1.14
   0 -18  -5    1.08    0.47
   0 -18  -5    0.54    0.47
   0  18   5    0.40    0.40
   0  18   5    0.54    0.67
   0 -18  -5    0.67    0.81
   0 -18  -5   -0.40    0.94
   0  18   5    0.13    1.08
   0 -18  -6    1.01    0.47
   0 -18  -6    0.40    0.40
   0  18   6    0.40    0.67
   0  18   6    0.27    0.40
   0 -18  -6    0.74    0.94
   0 -18  -6    1.48    0.81
   0  18   6    0.34    0.81
   0  18   6    1.28    1.08
   0 -18  -7    0.40    0.47
   0 -18  -7    0.00    0.40
   0 -18  -7    0.07    0.81
   0 -18  -7   -1.68    0.94
   0  18   7    0.20    1.01
   0  18   7    0.61    0.81
   0 -18  -8    0.54    0.54
   0 -18  -8    0.54    0.47
   0  18   8    0.54    0.61
   0  18   8    0.13    0.47
   0 -18  -8    0.20    0.87
   0 -18  -8    0.00    0.87
   0  18   8    1.28    1.08
   0  18   8    0.67    0.81
   0 -18  -9    0.74    0.47
   0 -18  -9    0.67    0.47
   0  18   9    0.13    0.61
   0  18   9    0.27    0.47
   0 -18  -9    1.55    0.87
   0 -18  -9    0.81    0.94
   0  18   9    1.21    1.08
   0  18   9    1.21    0.81
   0 -18 -10    0.67    0.47
   0 -18 -10    1.01    0.47
   0  18  10   -1.08    0.54
   0  18  10    0.20    0.54
   0 -18 -10    0.61    0.87
   0 -18 -10   -0.34    0.87
   0  18  10    0.87    0.81
   0  18  10   -0.61    1.01
   0 -18 -11    0.13    0.47
   0 -18 -11    0.47    0.47
   0  18  11    0.07    0.61
   0  18  11   -0.07    0.54
   0 -18 -11   -0.13    0.87
   0 -18 -11   -0.20    0.87
   0  18  11    0.07    1.08
   0  18  11    0.74    0.81
   0 -18 -12    0.00    0.47
   0 -18 -12    0.13    0.47
   0  18  12    0.54    0.54
   0  18  12    1.01    0.61
   0 -18 -12   -0.20    0.87
   0  18  12    0.54    0.87
   0 -18 -13    1.41    0.54
   0 -18 -13    0.67    0.54
   0  18  13    1.08    0.61
   0  18  13    0.47    0.61
   0 -18 -14    0.34    0.54
   0 -18 -14    0.40    0.54
   0  18  14    0.67    0.61
   0  18  14    0.27    0.54
   0 -18 -15    0.61    0.54
   0 -18 -15    0.87    0.61
   0  18  15    0.54    0.61
   0  18  15    0.27    0.54
   0 -18 -16   -0.07    0.54
   0 -19   6    0.13    1.01
   0 -19   6   -0.54    1.01
   0  19  -6    0.81    1.14
   0  19  -6    1.21    1.01
   0 -19   5    2.09    1.08
   0 -19   5    1.41    1.21
   0  19  -5    2.09    1.21
   0  19  -5    1.01    1.14
   0 -19   4   -0.34    0.81
   0 -19   4   -0.74    0.94
   0  19  -4    1.01    1.01
   0  19  -4   -0.20    1.08
   0 -19   3    0.81    0.87
   0 -19   3    1.55    1.01
   0  19  -3   -0.81    0.94
   0  19  -3    0.61    1.28
   0 -19   2    0.07    0.47
   0  19  -2    0.40    0.47
   0 -19   2    1.21    0.87
   0 -19   2   -0.54    0.94
   0  19  -2    0.07    1.01
   0  19  -2    1.01    1.21
   0 -19   1    0.47    0.54
   0  19  -1    0.87    0.81
   0  19  -1    0.74    0.47
   0 -19   1   -0.34    0.87
   0 -19   1   -0.40    0.87
   0  19  -1    0.54    1.21
   0  19  -1    1.88    0.94
   0 -19   0    1.21    0.54
   0  19   0    2.76    0.54
   0  19   0    2.49    0.87
   0 -19   0    1.35    0.94
   0 -19   0    1.55    0.94
   0  19   0    2.83    1.28
   0  19   0    1.75    0.94
   0 -19  -1    2.09    0.67
   0 -19  -1    3.63    0.61
   0  19   1    3.03    0.87
   0  19   1    2.49    0.54
   0 -19  -1    3.84    1.08
   0 -19  -1    2.96    1.08
   0  19   1    2.02    1.21
   0  19   1    1.48    0.94
   0 -19  -2    1.08    0.54
   0 -19  -2    0.54    0.47
   0  19   2    0.00    0.40
   0  19   2   -0.27    0.74
   0 -19  -2    0.81    0.94
   0 -19  -2    0.20    0.94
   0  19   2   -0.40    0.87
   0  19   2   -0.47    1.14
   0 -19  -3    0.34    0.47
   0 -19  -3   -0.61    0.47
   0  19   3    0.13    0.40
   0  19   3   -0.07    0.74
   0 -19  -3    0.54    0.94
   0 -19  -3    1.88    1.01
   0  19   3    1.35    0.94
   0  19   3    0.27    1.14
   0 -19  -4    0.34    0.54
   0 -19  -4    1.08    0.54
   0  19   4    1.55    0.47
   0  19   4    0.20    0.67
   0 -19  -4    1.41    0.94
   0  19   4    2.76    0.94
   0  19   4    2.36    1.21
   0 -19  -5   -0.74    0.47
   0 -19  -5    1.08    0.47
   0  19   5   -0.34    0.67
   0 -19  -5    0.27    0.87
   0 -19  -5   -2.36    1.01
   0  19   5   -1.61    1.14
   0  19   5    0.20    0.94
   0 -19  -6   -0.47    0.47
   0 -19  -6   -0.20    0.40
   0  19   6   -0.20    0.61
   0  19   6   -0.34    0.40
   0 -19  -6   -0.27    0.87
   0 -19  -6    1.61    1.08
   0  19   6    0.07    1.08
   0 -19  -7    0.00    0.47
   0 -19  -7    0.00    0.40
   0  19   7   -0.40    0.67
   0  19   7    0.13    0.47
   0 -19  -7    0.81    0.87
   0 -19  -7    1.14    1.01
   0  19   7    0.47    0.87
   0  19   7   -0.40    1.01
   0 -19  -8   -0.34    0.54
   0 -19  -8    0.47    0.47
   0  19   8   -0.20    0.47
   0  19   8   -0.74    0.61
   0 -19  -8   -0.13    0.94
   0 -19  -8    0.27    0.94
   0  19   8    0.47    1.08
   0  19   8    0.40    0.87
   0 -19  -9   -0.47    0.47
   0 -19  -9    0.40    0.54
   0  19   9   -1.21    0.61
   0  19   9    0.00    0.54
   0 -19  -9   -0.07    0.94
   0  19   9    0.40    0.81
   0 -19 -10    2.09    0.61
   0 -19 -10    1.75    0.61
   0  19  10    1.75    0.67
   0  19  10    1.41    0.67
   0 -19 -11    0.13    0.54
   0 -19 -11   -0.27    0.54
   0  19  11    0.40    0.61
   0  19  11   -0.54    0.61
   0 -19 -12    0.94    0.54
   0 -19 -12    1.08    0.61
   0  19  12    0.47    0.61
   0  19  12   -0.34    0.61
   0 -19 -13    0.34    0.54
   0  19  13    0.00    0.61
   0  19  13    0.00    0.67
   0 -20   2    0.07    1.08
   0 -20   2    1.48    1.08
   0  20  -2    1.55    1.28
   0  20  -2    0.81    1.08
   0 -20   1    0.34    0.94
   0 -20   1   -1.88    0.94
   0  20  -1   -1.75    0.94
   0  20  -1   -0.61    1.14
   0 -20   0   -0.13    0.94
   0 -20   0    1.35    1.01
   0  20   0   -1.55    1.08
   0  20   0   -1.55    0.94
   0 -20  -1   -0.40    0.94
   0 -20  -1   -0.27    0.94
   0  20   1   -0.13    0.94
   0  20   1    0.13    1.21
   0 -20  -2   -0.13    0.87
   0 -20  -2   -0.54    0.87
   0  20   2    0.00    0.87
   0  20   2   -0.94    1.14
   0 -20  -3   -1.35    0.87
   0 -20  -3   -1.35    0.94
   0  20   3    0.47    1.21
   0  20   3    1.21    0.87
   0 -20  -4    0.61    0.54
   0 -20  -4    0.87    0.94
   0  20   4   -0.40    0.87
   0 -20  -5    0.54    0.61
   0  20   5    1.14    0.61
   0 -20  -6    0.54    0.54
   0  20   6   -0.13    0.54
   0 -20  -7    2.02    0.61
   0  20   7    1.08    0.61
   0 -20  -8    0.67    0.61
   1 -20  -7    0.20    0.54
   1 -20  -6    0.07    0.54
  -1  19  13   -0.13    0.61
  -1  19  13    0.47    0.61
   1 -19 -13    0.13    0.54
  -1  19  12   -0.20    0.61
  -1  19  12    1.14    0.67
   1 -19 -12    0.13    0.54
   1 -19 -12   -0.13    0.54
  -1  19  11    0.47    0.61
  -1  19  11   -0.07    0.61
   1 -19 -11   -0.34    0.54
   1 -19 -11   -0.54    0.54
  -1  19  10   -0.27    0.61
  -1  19  10    1.01    0.67
   1 -19 -10   -0.20    0.61
   1 -19 -10   -0.40    0.54
  -1  19   9   -0.61    0.61
  -1  19   9    0.00    0.54
   1 -19  -9    0.20    0.54
   1 -19  -9    0.34    0.54
  -1  19   8    0.87    0.54
  -1  19   8    0.81    0.67
   1 -19  -8    1.68    0.61
   1 -19  -8    1.21    0.61
  -1  19   7    0.07    0.61
  -1  19   7    0.40    0.47
   1 -19  -7   -0.07    0.54
   1 -19  -7    0.61    0.54
  -1  19   7   -1.14    0.87
   1 -19  -7    0.27    0.94
  -1  19   6    0.13    0.47
  -1  19   6    0.07    0.67
   1 -19  -6    1.01    0.54
   1 -19  -6    0.20    0.47
  -1  19   6   -0.81    1.08
  -1  19   6   -0.47    0.94
   1 -19  -6   -0.61    0.87
   1 -19  -6    0.61    1.01
  -1  19   5    1.01    0.74
  -1  19   5   -0.34    0.47
   1 -19  -5    0.47    0.47
   1 -19  -5    0.07    0.54
  -1  19   5    0.20    0.94
   1 -19  -5    0.67    1.01
   1 -19  -5    0.87    0.87
  -1  19   4    0.34    0.47
  -1  19   4    1.28    0.81
   1 -19  -4    0.54    0.47
   1 -19  -4    0.61    0.54
  -1  19   4    2.49    1.01
  -1  19   4    0.61    1.14
   1 -19  -4    0.94    0.87
   1 -19  -4    0.34    1.08
  -1  19   3    0.67    0.47
  -1  19   3    0.74    0.81
   1 -19  -3    0.13    0.54
   1 -19  -3    0.94    0.47
  -1  19   3    0.27    0.87
  -1  19   3   -0.27    1.28
   1 -19  -3    0.20    1.08
  -1  19   2    3.03    0.61
  -1  19   2    3.16    0.87
   1 -19  -2    1.82    0.61
   1 -19  -2    2.62    0.61
  -1  19   2    4.17    1.01
  -1  19   2    0.74    1.28
   1 -19  -2    2.29    1.01
   1 -19  -2    3.16    1.14
  -1  19   1    0.40    0.81
   1 -19  -1    0.07    0.54
   1 -19  -1   -0.74    0.47
  -1  19   1    0.07    1.14
  -1  19   1    0.47    0.87
   1 -19  -1    0.54    0.94
   1 -19  -1   -0.67    0.87
  -1  19   0    1.55    0.61
   1 -19   0    0.81    0.54
   1 -19   0    0.27    0.47
  -1  19   0    1.01    1.28
  -1  19   0    2.02    1.01
   1 -19   0    0.40    0.94
   1 -19   0    0.94    0.94
  -1  19  -1    1.88    0.54
   1 -19   1    1.35    0.54
  -1  19  -1    0.81    1.28
  -1  19  -1    1.75    1.01
   1 -19   1    2.89    1.01
   1 -19   1    1.48    0.87
  -1  19  -2   -0.07    1.14
  -1  19  -2    3.23    1.01
   1 -19   2   -0.47    0.94
   1 -19   2    0.20    0.87
  -1  19  -3    5.25    1.35
  -1  19  -3    6.26    1.21
   1 -19   3    6.46    1.21
   1 -19   3    4.51    1.08
  -1  19  -4    1.88    1.14
  -1  19  -4   -0.40    0.94
   1 -19   4   -0.67    0.94
   1 -19   4   -1.88    0.94
  -1  19  -5   -0.67    1.14
  -1  19  -5    1.75    1.08
   1 -19   5   -1.01    1.01
   1 -19   5   -1.28    0.94
  -1  18  15    0.20    0.54
  -1  18  15   -0.07    0.61
   1 -18 -15    0.27    0.47
   1 -18 -15   -0.13    0.54
  -1  18  14    0.00    0.61
  -1  18  14   -0.13    0.54
   1 -18 -14   -0.27    0.54
   1 -18 -14    0.27    0.54
  -1  18  13    1.01    0.61
  -1  18  13    0.94    0.61
   1 -18 -13    1.21    0.54
   1 -18 -13    0.74    0.61
  -1  18  12   -0.07    0.54
  -1  18  12   -0.20    0.54
   1 -18 -12    0.61    0.54
   1 -18 -12   -0.20    0.47
  -1  18  11    2.76    0.74
  -1  18  11    3.16    0.74
   1 -18 -11    3.23    0.67
   1 -18 -11    3.63    0.67
  -1  18  11    1.88    1.08
   1 -18 -11    3.57    1.14
  -1  18  10    0.54    0.61
  -1  18  10    0.40    0.61
   1 -18 -10    0.54    0.54
   1 -18 -10    0.87    0.54
  -1  18  10   -0.13    1.08
  -1  18  10    2.29    0.87
   1 -18 -10    1.08    0.94
   1 -18 -10    0.00    0.94
  -1  18   9   -0.61    0.61
  -1  18   9    0.07    0.47
   1 -18  -9    0.34    0.54
   1 -18  -9   -0.54    0.47
  -1  18   9    0.20    0.87
  -1  18   9   -0.34    1.08
   1 -18  -9   -0.20    0.87
   1 -18  -9   -1.61    0.87
  -1  18   8    1.48    0.74
  -1  18   8    2.62    0.54
   1 -18  -8    3.23    0.67
   1 -18  -8    2.56    0.54
  -1  18   8    3.43    1.21
  -1  18   8    2.96    0.94
   1 -18  -8    2.62    0.94
   1 -18  -8    2.56    1.08
  -1  18   7    0.94    0.47
  -1  18   7    0.87    0.61
   1 -18  -7    0.67    0.47
   1 -18  -7   -0.07    0.40
  -1  18   7    0.74    0.81
  -1  18   7   -1.14    1.01
   1 -18  -7    0.27    0.94
   1 -18  -7   -0.20    0.94
  -1  18   6    1.48    0.47
  -1  18   6    0.87    0.67
   1 -18  -6    0.47    0.47
   1 -18  -6    0.87    0.54
  -1  18   6    1.75    0.87
  -1  18   6    0.13    1.01
   1 -18  -6    2.83    0.94
   1 -18  -6    0.34    1.01
  -1  18   5    0.34    0.40
  -1  18   5    0.20    0.67
   1 -18  -5   -0.20    0.47
   1 -18  -5   -0.07    0.40
  -1  18   5   -0.07    0.87
  -1  18   5    0.00    1.08
   1 -18  -5    1.55    0.94
   1 -18  -5    0.27    1.01
  -1  18   4   -0.34    0.40
  -1  18   4    0.40    0.67
   1 -18  -4   -0.13    0.47
   1 -18  -4    0.34    0.47
   1 -18  -4   -0.34    0.94
   1 -18  -4   -0.87    0.81
  -1  18   3    0.81    0.81
   1 -18  -3    0.13    0.47
   1 -18  -3    1.21    0.47
  -1  18   3   -0.13    0.81
  -1  18   3    0.81    1.14
   1 -18  -3   -1.14    0.94
   1 -18  -3    0.20    0.87
  -1  18   2    1.75    0.40
   1 -18  -2    2.29    0.61
   1 -18  -2    1.82    0.54
  -1  18   2    1.21    1.21
  -1  18   2    3.16    0.94
   1 -18  -2    0.61    1.01
  -1  18   1   -0.81    0.34
  -1  18   1    0.47    0.74
   1 -18  -1    0.20    0.47
   1 -18  -1    0.07    0.47
  -1  18   1    0.61    1.14
  -1  18   1    0.40    0.74
   1 -18  -1    0.74    0.87
   1 -18  -1   -1.48    0.87
  -1  18   0    0.81    0.81
  -1  18   0    1.21    0.40
   1 -18   0    1.88    0.54
   1 -18   0    1.41    0.54
  -1  18   0    1.41    0.87
  -1  18   0   -1.48    1.14
   1 -18   0    1.75    0.94
   1 -18   0    0.34    0.94
  -1  18  -1   -0.34    0.74
  -1  18  -1    0.67    0.40
   1 -18   1   -0.07    0.40
   1 -18   1    0.47    0.54
  -1  18  -1   -0.61    0.81
  -1  18  -1   -1.35    1.14
   1 -18   1   -0.74    0.87
   1 -18   1   -0.40    0.87
  -1  18  -2    2.69    0.87
  -1  18  -2    2.02    0.47
   1 -18   2    2.42    0.54
   1 -18   2    2.15    0.67
  -1  18  -2    1.88    0.94
  -1  18  -2    2.22    1.28
   1 -18   2    1.82    0.94
   1 -18   2    3.43    0.94
  -1  18  -3   -0.27    0.40
  -1  18  -3    1.21    0.81
   1 -18   3    0.34    0.47
  -1  18  -3    1.28    0.87
  -1  18  -3    0.34    1.21
   1 -18   3    0.81    0.87
   1 -18   3    0.27    0.87
  -1  18  -4    3.43    0.87
  -1  18  -4    2.83    0.54
   1 -18   4    1.95    0.61
  -1  18  -4    2.49    1.01
  -1  18  -4    0.81    1.21
   1 -18   4    3.90    1.08
   1 -18   4    1.55    0.94
  -1  18  -5   -0.27    0.94
  -1  18  -5   -0.13    1.21
   1 -18   5    0.07    0.94
   1 -18   5   -0.67    0.87
  -1  18  -6    2.02    1.14
  -1  18  -6    1.48    1.21
   1 -18   6    1.61    1.01
   1 -18   6    1.41    1.01
  -1  18  -7    1.14    1.08
  -1  18  -7    2.09    1.21
   1 -18   7    3.77    1.08
   1 -18   7    3.03    1.08
  -1  17  17    0.67    0.54
  -1  17  17   -0.61    0.54
   1 -17 -17    0.61    0.54
   1 -17 -17   -0.40    0.47
   1 -17 -16    2.76    0.67
   1 -17 -16    2.83    0.67
  -1  17  15   -0.34    0.54
  -1  17  15   -1.01    0.54
   1 -17 -15    0.20    0.54
   1 -17 -15    0.47    0.54
  -1  17  14   -0.27    0.54
  -1  17  14    0.40    0.54
   1 -17 -14    0.00    0.47
   1 -17 -14    0.74    0.54
  -1  17  13    0.27    0.61
  -1  17  13    0.74    0.54
   1 -17 -13    0.67    0.47
   1 -17 -13    0.47    0.54
  -1  17  13    0.47    1.08
  -1  17  13   -0.20    0.87
   1 -17 -13    0.13    1.01
   1 -17 -13    1.48    0.94
  -1  17  12    0.07    0.54
  -1  17  12   -0.13    0.54
   1 -17 -12    0.74    0.47
   1 -17 -12   -0.20    0.47
  -1  17  12    0.61    0.87
  -1  17  12   -0.13    1.08
   1 -17 -12    1.48    0.94
   1 -17 -12    0.67    0.87
  -1  17  11    0.87    0.61
  -1  17  11    0.74    0.54
   1 -17 -11    0.13    0.47
   1 -17 -11    0.00    0.47
  -1  17  11    0.34    0.81
  -1  17  11   -0.13    1.01
   1 -17 -11   -0.13    0.87
   1 -17 -11    0.54    0.87
  -1  17  10    0.34    0.54
  -1  17  10    0.61    0.54
   1 -17 -10    0.07    0.47
   1 -17 -10    0.74    0.47
  -1  17  10    0.47    0.81
  -1  17  10   -0.47    1.08
   1 -17 -10    0.94    0.94
   1 -17 -10    0.54    0.81
  -1  17   9    0.00    0.47
  -1  17   9   -0.07    0.54
   1 -17  -9    0.34    0.40
   1 -17  -9    0.34    0.54
  -1  17   9    1.01    0.81
  -1  17   9   -0.34    1.01
   1 -17  -9    0.81    0.87
   1 -17  -9   -0.94    0.81
  -1  17   8    4.37    0.54
  -1  17   8    4.98    0.81
   1 -17  -8    4.91    0.74
   1 -17  -8    4.24    0.54
  -1  17   8    4.64    1.01
  -1  17   8    1.28    1.21
   1 -17  -8    4.78    1.01
   1 -17  -8    2.89    1.08
  -1  17   7    2.02    0.47
  -1  17   7    1.21    0.74
   1 -17  -7    1.88    0.61
   1 -17  -7    1.95    0.47
  -1  17   7    0.74    1.14
  -1  17   7    3.50    0.94
   1 -17  -7    1.82    1.01
   1 -17  -7    3.03    0.87
  -1  17   6    3.97    0.54
  -1  17   6    4.37    0.87
   1 -17  -6    4.84    0.61
   1 -17  -6    4.31    0.74
   1 -17  -6    5.99    0.94
   1 -17  -6    5.38    1.21
   1 -17  -5    5.99    0.74
   1 -17  -5    5.32    0.61
  -1  17   5    4.98    1.35
  -1  17   5    4.37    0.94
   1 -17  -5    4.58    1.21
   1 -17  -5    4.17    0.87
  -1  17   4    0.07    0.34
  -1  17   4   -0.07    0.67
   1 -17  -4   -0.07    0.47
   1 -17  -4    0.00    0.40
  -1  17   4   -0.40    0.74
  -1  17   4    0.27    1.08
   1 -17  -4   -0.27    0.74
   1 -17  -4    1.14    0.94
  -1  17   3    0.81    0.74
  -1  17   3   -0.27    0.34
   1 -17  -3    0.00    0.47
   1 -17  -3   -0.07    0.34
  -1  17   3    0.07    1.21
   1 -17  -3   -0.67    0.74
   1 -17  -3    0.67    1.01
  -1  17   2   -1.01    0.74
  -1  17   2   -0.07    0.34
   1 -17  -2    0.40    0.47
   1 -17  -2   -0.13    0.40
  -1  17   2    0.74    0.81
  -1  17   2    1.28    1.21
   1 -17  -2   -0.61    0.74
   1 -17  -2    0.00    0.94
  -1  17   1    1.01    0.34
  -1  17   1    1.08    0.81
   1 -17  -1    1.61    0.47
   1 -17  -1    1.08    0.54
  -1  17   1    0.47    0.81
  -1  17   1    1.61    1.21
   1 -17  -1    0.27    0.81
  -1  17   0   -0.13    0.34
  -1  17   0   -0.34    0.74
   1 -17   0   -0.20    0.40
  -1  17   0   -0.07    0.74
  -1  17   0    0.54    1.21
   1 -17   0    0.74    0.81
   1 -17   0   -0.13    0.81
  -1  17  -1    3.23    0.94
  -1  17  -1    3.30    0.47
   1 -17   1    3.16    0.67
  -1  17  -1    3.43    1.35
  -1  17  -1    3.97    0.87
   1 -17   1    2.56    0.94
   1 -17   1    3.70    0.94
  -1  17  -2   -0.20    0.74
  -1  17  -2   -0.13    0.34
   1 -17   2    0.27    0.40
   1 -17   2   -0.13    0.54
  -1  17  -2   -0.67    1.21
  -1  17  -2    1.01    0.81
   1 -17   2    0.67    0.81
   1 -17   2   -0.27    0.81
  -1  17  -3    0.00    0.40
  -1  17  -3   -1.14    0.74
   1 -17   3   -0.20    0.54
   1 -17   3    0.07    0.47
  -1  17  -3    1.14    1.21
  -1  17  -3    0.94    0.81
   1 -17   3    0.61    0.87
   1 -17   3   -0.81    0.81
  -1  17  -4    0.47    0.40
  -1  17  -4    0.34    0.81
   1 -17   4    1.14    0.47
   1 -17   4    0.07    0.54
  -1  17  -4   -0.40    0.87
  -1  17  -4    2.02    1.28
   1 -17   4    1.41    0.94
   1 -17   4    0.07    0.81
  -1  17  -5   -0.74    0.74
  -1  17  -5   -0.27    0.40
   1 -17   5    0.34    0.47
   1 -17   5   -0.40    0.47
  -1  17  -5   -0.61    1.14
  -1  17  -5   -0.81    0.87
   1 -17   5    0.61    0.87
   1 -17   5    1.01    0.87
  -1  17  -6   -0.07    0.34
  -1  17  -6    1.08    0.74
   1 -17   6    0.27    0.47
   1 -17   6   -0.54    0.47
  -1  17  -6    1.41    0.87
  -1  17  -6    0.27    1.21
   1 -17   6   -0.47    0.87
   1 -17   6   -0.54    0.81
  -1  17  -7    0.47    0.40
   1 -17   7    0.81    0.47
  -1  17  -7    2.49    1.21
  -1  17  -7    1.01    0.94
   1 -17   7    1.41    0.94
   1 -17   7    0.47    0.87
  -1  17  -8   -0.61    0.94
  -1  17  -8    1.55    1.14
   1 -17   8    1.88    1.01
   1 -17   8   -0.74    0.87
  -1  17  -9    1.88    1.01
  -1  17  -9    0.00    0.94
   1 -17   9    0.94    1.01
   1 -17   9   -0.20    0.81
   1 -17  10    5.11    1.08
   1 -17  10    8.14    1.35
  -1  16  18   -0.47    0.54
  -1  16  18    0.40    0.61
   1 -16 -18    0.20    0.27
   1 -16 -18   -0.94    0.54
  -1  16  17    0.00    0.54
  -1  16  17    0.67    0.61
   1 -16 -17   -0.34    0.40
   1 -16 -17   -0.74    0.54
  -1  16  16    1.82    0.61
  -1  16  16    0.87    0.67
   1 -16 -16    1.61    0.61
   1 -16 -16    1.08    0.61
  -1  16  16    1.01    1.01
   1 -16 -16    1.61    1.01
  -1  16  15   -0.20    0.61
  -1  16  15    0.13    0.47
   1 -16 -15    0.67    0.54
   1 -16 -15    0.54    0.47
  -1  16  15    0.27    0.81
  -1  16  15   -0.13    0.94
   1 -16 -15    0.67    0.87
   1 -16 -15   -0.07    0.87
  -1  16  14    1.28    0.61
  -1  16  14    0.67    0.54
   1 -16 -14   -0.07    0.47
   1 -16 -14    0.40    0.47
  -1  16  14    0.27    0.87
  -1  16  14    0.20    0.94
   1 -16 -14   -0.20    0.87
   1 -16 -14    0.40    0.87
  -1  16  13    0.67    0.54
  -1  16  13    0.81    0.61
   1 -16 -13    0.20    0.47
   1 -16 -13    0.34    0.47
  -1  16  13    1.08    0.87
  -1  16  13    0.07    0.94
   1 -16 -13    0.34    0.81
   1 -16 -13    0.13    0.87
  -1  16  12   -0.20    0.47
  -1  16  12    0.34    0.54
   1 -16 -12   -0.34    0.47
   1 -16 -12   -0.13    0.40
  -1  16  12   -1.61    1.08
  -1  16  12    1.08    0.81
   1 -16 -12    0.34    0.81
   1 -16 -12   -0.27    0.74
  -1  16  11    0.54    0.54
  -1  16  11    0.40    0.54
   1 -16 -11    0.54    0.54
   1 -16 -11    0.40    0.47
  -1  16  11    1.28    1.14
  -1  16  11    1.28    0.81
   1 -16 -11    0.00    0.74
   1 -16 -11    1.55    0.94
  -1  16  10    0.34    0.61
  -1  16  10   -0.61    0.54
   1 -16 -10    0.54    0.47
   1 -16 -10    0.27    0.47
  -1  16  10    1.88    1.14
  -1  16  10    0.47    0.74
   1 -16 -10    0.47    0.87
   1 -16 -10    0.27    0.74
  -1  16   9    0.34    0.47
  -1  16   9    0.47    0.54
   1 -16  -9    1.08    0.47
   1 -16  -9    0.40    0.40
  -1  16   9    0.47    1.14
  -1  16   9    0.34    0.74
   1 -16  -9    0.40    0.94
   1 -16  -9   -0.13    0.74
  -1  16   8   -0.34    0.54
  -1  16   8    0.07    0.40
   1 -16  -8    0.13    0.40
   1 -16  -8    0.20    0.47
  -1  16   8    0.13    1.14
  -1  16   8   -0.61    0.74
   1 -16  -8    1.21    0.94
   1 -16  -8   -0.47    0.74
  -1  16   7    1.61    0.74
   1 -16  -7    1.68    0.47
   1 -16  -7    2.49    0.61
  -1  16   7    0.34    1.14
  -1  16   7    0.74    0.74
   1 -16  -7    2.36    0.87
   1 -16  -7    4.24    1.08
  -1  16   6    3.50    0.54
  -1  16   6    2.96    0.81
   1 -16  -6    2.22    0.54
   1 -16  -6    3.23    0.67
  -1  16   6    2.15    1.28
  -1  16   6    4.04    0.87
   1 -16  -6    4.04    1.14
   1 -16  -6    4.37    0.94
  -1  16   5   -0.61    0.61
  -1  16   5    0.61    0.40
   1 -16  -5    0.00    0.47
   1 -16  -5   -0.27    0.47
  -1  16   5   -1.28    1.01
  -1  16   5   -0.13    0.74
   1 -16  -5   -0.87    0.74
   1 -16  -5   -0.54    0.94
  -1  16   4    8.07    0.94
  -1  16   4    6.46    0.61
   1 -16  -4    5.52    0.74
   1 -16  -4    5.99    0.67
  -1  16   4    7.47    1.01
  -1  16   4    7.54    1.35
   1 -16  -4    6.46    1.28
   1 -16  -4    7.74    1.08
  -1  16   3    1.28    0.67
  -1  16   3    0.47    0.34
   1 -16  -3   -0.07    0.47
   1 -16  -3    0.40    0.40
  -1  16   3    1.75    1.08
  -1  16   3    0.54    0.81
   1 -16  -3   -1.68    0.81
   1 -16  -3   -0.27    0.94
  -1  16   2   15.21    1.35
  -1  16   2   13.93    0.81
   1 -16  -2   13.26    0.87
  -1  16   2   11.71    1.68
   1 -16  -2   12.85    1.48
   1 -16  -2   14.47    1.35
  -1  16   1    0.07    0.34
  -1  16   1   -1.01    0.67
   1 -16  -1   -0.13    0.47
  -1  16   1   -0.27    1.21
  -1  16   1    0.47    0.74
   1 -16  -1    0.81    1.01
   1 -16  -1    1.21    0.87
  -1  16   0    0.94    0.34
  -1  16   0    1.01    0.74
   1 -16   0    1.21    0.40
   1 -16   0    1.88    0.61
  -1  16   0    1.14    0.81
  -1  16   0    2.15    1.21
   1 -16   0    1.08    0.87
   1 -16   0    1.35    0.94
  -1  16  -1    0.00    0.74
  -1  16  -1   -0.34    0.34
   1 -16   1    0.40    0.54
   1 -16   1   -0.07    0.40
  -1  16  -1    1.35    0.81
  -1  16  -1   -2.09    1.08
   1 -16   1    0.74    0.87
   1 -16   1    1.68    0.87
  -1  16  -2    3.97    0.47
  -1  16  -2    3.63    0.94
   1 -16   2    3.84    0.54
   1 -16   2    3.43    0.67
  -1  16  -2    1.75    0.87
  -1  16  -2    3.36    1.35
   1 -16   2    4.78    1.08
   1 -16   2    2.76    1.08
  -1  16  -3   -0.27    0.34
  -1  16  -3    0.20    0.74
   1 -16   3    0.27    0.54
   1 -16   3    0.20    0.40
  -1  16  -3   -0.07    1.14
  -1  16  -3   -1.21    0.74
   1 -16   3   -1.14    0.87
   1 -16   3    1.35    0.87
  -1  16  -4    6.33    1.01
  -1  16  -4    4.51    0.54
   1 -16   4    5.79    0.74
   1 -16   4    5.52    0.61
  -1  16  -4    9.15    1.48
  -1  16  -4    6.26    1.14
   1 -16   4    7.47    1.21
   1 -16   4    6.46    1.14
  -1  16  -5    0.67    0.74
  -1  16  -5    0.27    0.34
   1 -16   5    0.67    0.47
   1 -16   5    1.55    0.54
  -1  16  -5   -0.27    0.94
  -1  16  -5    0.40    1.14
   1 -16   5   -1.41    0.94
   1 -16   5    1.48    0.94
  -1  16  -6    0.87    0.74
  -1  16  -6    1.68    0.40
   1 -16   6    1.14    0.54
   1 -16   6    1.82    0.54
  -1  16  -6    1.08    0.87
  -1  16  -6    1.41    1.21
   1 -16   6    2.76    0.94
   1 -16   6    2.56    0.94
  -1  16  -7   -0.20    0.67
  -1  16  -7    0.40    0.34
   1 -16   7    0.34    0.47
   1 -16   7   -0.20    0.47
  -1  16  -7    2.96    1.28
  -1  16  -7   -0.54    0.87
   1 -16   7    0.54    0.87
   1 -16   7   -0.20    0.94
  -1  16  -8    4.84    0.54
  -1  16  -8    4.37    0.87
   1 -16   8    5.32    0.67
   1 -16   8    4.17    0.67
  -1  16  -8    4.04    1.08
  -1  16  -8    4.37    1.41
   1 -16   8    7.27    1.08
   1 -16   8    7.33    1.21
  -1  16  -9    2.15    0.47
   1 -16   9    1.82    0.54
  -1  16  -9    2.02    1.14
  -1  16  -9    1.01    1.01
   1 -16   9    0.87    0.81
   1 -16   9    3.84    1.01
  -1  16 -10   -0.61    1.01
  -1  16 -10   -0.13    1.08
   1 -16  10   -0.54    0.87
   1 -16  10   -0.67    0.74
  -1  16 -11    2.56    1.14
  -1  16 -11    1.41    1.01
   1 -16  11    3.16    1.14
   1 -16  11    1.55    0.87
  -1  15  19   -0.27    0.61
  -1  15  19    1.68    0.61
   1 -15 -19    0.20    0.27
   1 -15 -19    1.01    0.61
  -1  15  18    0.74    0.47
  -1  15  18    1.14    0.61
   1 -15 -18    0.07    0.54
   1 -15 -18    0.20    0.27
  -1  15  17    0.34    0.61
  -1  15  17    0.47    0.47
   1 -15 -17   -0.47    0.47
   1 -15 -17    0.00    0.27
  -1  15  17   -0.54    0.94
  -1  15  17   -1.21    0.87
   1 -15 -17    0.13    0.94
   1 -15 -17   -1.01    0.87
  -1  15  16    0.61    0.67
  -1  15  16   -0.07    0.47
   1 -15 -16    0.74    0.47
   1 -15 -16   -0.67    0.27
  -1  15  16    1.75    1.01
  -1  15  16    0.47    1.01
   1 -15 -16    1.55    0.87
   1 -15 -16    1.68    0.94
  -1  15  15   -0.07    0.61
  -1  15  15    0.13    0.47
   1 -15 -15    0.20    0.47
   1 -15 -15    0.27    0.47
  -1  15  15    0.47    1.01
  -1  15  15    1.28    0.87
   1 -15 -15   -0.40    0.87
   1 -15 -15    0.40    0.87
  -1  15  14    0.67    0.47
  -1  15  14    0.67    0.61
   1 -15 -14    0.87    0.47
   1 -15 -14    0.81    0.47
  -1  15  14    1.14    0.87
  -1  15  14    0.27    1.08
   1 -15 -14    0.67    0.87
   1 -15 -14    2.49    0.87
  -1  15  13   -0.07    0.47
  -1  15  13    0.27    0.54
   1 -15 -13    0.34    0.47
   1 -15 -13    0.40    0.47
  -1  15  13    0.40    1.08
  -1  15  13    1.01    0.81
   1 -15 -13    0.54    0.81
   1 -15 -13    0.20    0.94
  -1  15  12    0.07    0.54
  -1  15  12   -0.07    0.47
   1 -15 -12   -0.67    0.47
   1 -15 -12    0.20    0.47
  -1  15  12   -0.81    1.08
  -1  15  12    0.00    0.74
   1 -15 -12    0.40    0.87
   1 -15 -12    0.40    0.81
   1 -15 -11    2.89    0.67
  -1  15  11    2.42    1.14
  -1  15  11    2.62    0.81
   1 -15 -11    2.22    0.87
   1 -15 -11    3.10    1.08
   1 -15 -10    4.31    0.61
  -1  15  10    5.05    1.28
  -1  15  10    5.05    0.94
   1 -15 -10    4.91    0.94
   1 -15 -10    5.99    1.21
  -1  15   9    1.75    0.61
   1 -15  -9    1.68    0.47
  -1  15   9    1.61    1.01
  -1  15   9    2.69    0.87
   1 -15  -9    1.75    0.94
   1 -15  -9    1.08    0.81
  -1  15   8    0.54    0.40
   1 -15  -8    0.67    0.47
   1 -15  -8    1.14    0.40
  -1  15   8    0.87    1.01
  -1  15   8    0.87    0.74
   1 -15  -8    1.35    0.87
   1 -15  -8    0.34    0.81
  -1  15   7    1.75    0.54
  -1  15   7    0.74    0.40
   1 -15  -7    0.81    0.40
   1 -15  -7    0.67    0.47
  -1  15   7    2.09    0.81
  -1  15   7   -0.20    1.14
   1 -15  -7    1.28    0.81
   1 -15  -7    1.55    0.94
  -1  15   6    5.85    0.54
  -1  15   6    5.05    0.74
   1 -15  -6    6.26    0.61
   1 -15  -6    6.59    0.74
  -1  15   6    5.18    0.94
  -1  15   6    4.31    1.28
   1 -15  -6    5.18    1.01
   1 -15  -6    4.04    1.08
  -1  15   5    0.61    0.34
  -1  15   5    0.13    0.54
   1 -15  -5    0.54    0.40
   1 -15  -5   -0.13    0.47
  -1  15   5   -0.47    1.08
   1 -15  -5    0.07    1.08
  -1  15   4   10.30    1.01
  -1  15   4    9.15    0.67
   1 -15  -4    9.35    0.74
  -1  15   3    0.34    0.34
  -1  15   3   -0.13    0.61
   1 -15  -3   -0.40    0.47
  -1  15   3    0.87    0.74
   1 -15  -3   -0.20    0.87
  -1  15   2   19.24    1.48
  -1  15   2   20.99    1.08
   1 -15  -2   20.93    1.08
   1 -15  -2   19.24    1.28
  -1  15   2   19.45    1.35
   1 -15  -2   20.12    1.55
   1 -15  -2   15.68    1.82
  -1  15   1    0.81    0.81
  -1  15   1    1.28    0.34
   1 -15  -1    1.48    0.40
  -1  15   1    0.61    1.21
   1 -15  -1    0.61    0.87
   1 -15  -1    0.40    1.01
  -1  15   0   -0.94    1.08
  -1  15   0    0.34    0.74
   1 -15   0    0.74    0.81
   1 -15   0   -0.81    0.81
  -1  15  -1    3.23    0.94
   1 -15   1    3.36    0.67
  -1  15  -1    5.58    1.35
  -1  15  -1    3.10    0.87
   1 -15   1    4.31    1.01
   1 -15   1    4.71    1.01
  -1  15  -2    1.68    0.40
  -1  15  -2    0.74    0.81
   1 -15   2    1.61    0.47
   1 -15   2    2.22    0.61
  -1  15  -2    2.56    0.81
  -1  15  -2    1.21    1.21
   1 -15   2    2.29    0.87
   1 -15   2   -0.27    0.94
  -1  15  -3    2.69    0.87
  -1  15  -3    2.42    0.40
   1 -15   3    1.61    0.61
   1 -15   3    2.42    0.54
  -1  15  -3    1.95    0.81
  -1  15  -3    4.84    1.28
   1 -15   3    2.02    0.87
   1 -15   3    1.75    0.94
  -1  15  -4    0.94    0.34
  -1  15  -4    0.94    0.81
   1 -15   4    0.74    0.47
   1 -15   4    1.14    0.54
  -1  15  -4    1.75    1.21
  -1  15  -4    1.28    0.81
   1 -15   4    1.08    0.87
   1 -15   4    0.81    0.81
  -1  15  -5    0.47    0.61
  -1  15  -5    0.54    0.34
   1 -15   5    0.27    0.47
   1 -15   5    0.87    0.47
  -1  15  -5   -0.87    0.74
  -1  15  -5   -1.82    1.14
   1 -15   5   -0.27    0.87
   1 -15   5    0.34    0.87
  -1  15  -6    1.08    0.40
  -1  15  -6    1.14    0.74
   1 -15   6    0.94    0.47
   1 -15   6    1.41    0.47
  -1  15  -6    1.01    1.21
  -1  15  -6    1.55    0.87
   1 -15   6    0.94    0.87
   1 -15   6    0.54    0.94
  -1  15  -7    0.81    0.40
  -1  15  -7    1.55    0.74
   1 -15   7    0.61    0.47
   1 -15   7    0.81    0.54
  -1  15  -7    1.35    1.28
  -1  15  -7    1.21    0.87
   1 -15   7    1.01    0.94
   1 -15   7   -0.54    0.87
  -1  15  -8    7.00    1.01
  -1  15  -8    6.93    0.61
   1 -15   8    6.66    0.74
   1 -15   8    5.99    0.74
  -1  15  -8    8.01    1.14
   1 -15   8    6.66    1.28
   1 -15   8    6.73    1.14
  -1  15  -9    4.51    0.94
  -1  15  -9    3.70    0.47
   1 -15   9    4.51    0.67
   1 -15   9    4.58    0.67
  -1  15  -9    3.03    1.01
  -1  15 -10    0.61    0.74
  -1  15 -10   -0.34    0.34
   1 -15  10    0.47    0.47
   1 -15  10    0.94    0.54
  -1  15 -11    0.34    1.08
  -1  15 -12    2.42    0.94
  -1  15 -12    0.34    1.08
   1 -15  12    0.13    0.87
   1 -15  12    0.67    0.81
  -1  15 -13    1.41    1.01
  -1  15 -13    0.27    0.94
   1 -15  13    0.54    0.74
   1 -15  13    0.54    1.01
  -1  14  20    0.74    0.54
  -1  14  20    0.07    0.54
   1 -14 -20    1.55    0.61
   1 -14 -20    0.00    0.27
  -1  14  19    0.67    0.54
  -1  14  19    1.28    0.67
   1 -14 -19    1.21    0.61
   1 -14 -19    0.13    0.27
  -1  14  19    1.41    1.08
  -1  14  19   -0.74    0.94
   1 -14 -19    1.01    1.01
   1 -14 -19    1.21    1.08
  -1  14  18    0.94    0.67
  -1  14  18    1.48    0.54
  -1  14  18    1.08    1.14
  -1  14  18    1.14    1.01
  -1  14  17   -0.47    0.47
  -1  14  17    0.54    0.61
   1 -14 -17    0.13    0.27
   1 -14 -17    0.27    0.47
  -1  14  17    0.61    1.01
  -1  14  17    0.34    0.94
   1 -14 -17   -1.35    0.94
   1 -14 -17   -0.61    0.81
  -1  14  16    0.40    0.61
  -1  14  16   -0.13    0.47
   1 -14 -16   -0.13    0.47
   1 -14 -16    0.54    0.27
  -1  14  16    0.47    0.81
  -1  14  16   -1.82    1.08
   1 -14 -16    1.21    0.87
   1 -14 -16   -0.27    0.87
  -1  14  15    1.01    0.47
  -1  14  15    0.74    0.67
   1 -14 -15   -0.13    0.27
   1 -14 -15    1.21    0.47
  -1  14  15    1.75    0.87
  -1  14  15    1.41    1.21
   1 -14 -15    0.20    0.81
   1 -14 -15    1.82    1.01
  -1  14  14    0.07    0.61
  -1  14  14    0.00    0.40
   1 -14 -14    0.13    0.54
   1 -14 -14    0.74    0.47
  -1  14  14    2.62    1.14
  -1  14  14    0.54    0.81
   1 -14 -14    0.61    0.74
   1 -14 -14   -0.07    0.94
  -1  14  13    3.70    1.01
  -1  14  13    5.52    1.28
   1 -14 -13    4.91    1.01
   1 -14 -13    7.94    1.21
  -1  14  12    1.14    0.47
  -1  14  12    1.21    0.61
  -1  14  12    1.08    0.81
  -1  14  12    0.27    1.08
   1 -14 -12    1.82    0.81
   1 -14 -12    0.67    0.87
  -1  14  11    5.52    0.67
  -1  14  11    4.44    0.67
   1 -14 -11    4.98    0.61
   1 -14 -11    5.25    0.67
  -1  14  11    4.37    1.21
  -1  14  11    4.51    0.87
   1 -14 -11    6.33    1.01
   1 -14 -11    5.18    1.08
   1 -14 -10    0.00    0.40
   1 -14 -10   -0.07    0.40
  -1  14  10   -0.40    0.74
  -1  14  10   -0.67    0.94
   1 -14 -10    0.13    0.87
   1 -14 -10    0.61    0.81
  -1  14   9    2.22    0.54
  -1  14   9    1.95    0.54
   1 -14  -9    2.02    0.47
   1 -14  -9    1.55    0.47
  -1  14   9    1.95    1.14
   1 -14  -9    1.41    1.08
  -1  14   8    0.07    0.47
  -1  14   8    0.54    0.40
   1 -14  -8    0.47    0.40
   1 -14  -8   -0.07    0.40
  -1  14   7   13.73    0.81
  -1  14   7   14.27    1.08
   1 -14  -7   13.73    0.81
   1 -14  -7   14.80    1.01
  -1  14   6    0.94    0.47
  -1  14   6    0.27    0.34
   1 -14  -6    0.13    0.47
   1 -14  -6    0.74    0.40
  -1  14   6    0.81    1.14
  -1  14   6    0.54    0.67
   1 -14  -6    0.13    0.87
   1 -14  -6    0.34    0.81
  -1  14   5   12.31    0.74
  -1  14   5   12.38    1.01
   1 -14  -5   11.17    1.01
  -1  14   5   10.97    1.48
  -1  14   5   12.85    1.14
   1 -14  -5   11.57    1.35
   1 -14  -5   11.44    1.14
  -1  14   4    3.30    0.67
  -1  14   4    3.77    0.47
   1 -14  -4    3.50    0.61
   1 -14  -4    3.84    0.47
  -1  14   4    5.58    0.87
  -1  14   4    2.96    1.08
   1 -14  -4    4.24    1.01
   1 -14  -4    4.10    0.87
  -1  14   3    2.36    0.61
  -1  14   3    2.36    0.40
   1 -14  -3    1.28    0.47
   1 -14  -3    1.61    0.40
  -1  14   3    1.21    0.74
  -1  14   3    2.36    1.08
   1 -14  -3    1.68    0.81
   1 -14  -3    1.01    0.94
  -1  14   2    1.61    0.34
  -1  14   2    0.61    0.61
   1 -14  -2    1.55    0.40
   1 -14  -2    0.94    0.47
  -1  14   2    1.75    0.74
  -1  14   2    1.08    1.01
   1 -14  -2    1.61    0.94
   1 -14  -2    2.76    0.81
  -1  14   1    5.99    0.54
  -1  14   1    6.73    0.87
   1 -14  -1    5.92    0.54
   1 -14  -1    4.98    0.67
  -1  14   1    4.91    0.87
  -1  14   1    4.84    1.21
   1 -14  -1    6.59    1.01
   1 -14  -1    5.58    1.14
  -1  14   0    0.27    0.67
  -1  14   0    0.61    0.34
   1 -14   0    0.74    0.40
   1 -14   0    0.81    0.47
  -1  14   0    0.07    1.08
  -1  14   0    0.40    0.81
   1 -14   0    0.27    0.74
   1 -14   0   -0.13    0.81
  -1  14  -1   16.28    1.35
  -1  14  -1   15.41    0.87
   1 -14   1   15.88    0.94
   1 -14   1   13.66    1.01
  -1  14  -1   16.42    1.28
  -1  14  -1   16.35    1.68
   1 -14   1   15.75    1.28
   1 -14   1   16.75    1.41
  -1  14  -2    3.97    0.87
  -1  14  -2    5.25    0.54
   1 -14   2    5.65    0.61
   1 -14   2    4.17    0.67
  -1  14  -2    4.98    1.28
  -1  14  -2    3.90    0.87
   1 -14   2    5.79    1.01
   1 -14   2    4.10    0.94
  -1  14  -3    0.87    0.34
   1 -14   3    1.14    0.47
  -1  14  -3    2.83    0.81
  -1  14  -3    0.81    1.08
   1 -14   3    1.82    0.81
   1 -14   3    1.28    0.87
  -1  14  -4    8.81    1.35
   1 -14   4   10.97    1.01
  -1  14  -4   13.93    1.21
  -1  14  -4   12.25    1.61
   1 -14   4   12.31    1.28
   1 -14   4   13.79    1.28
  -1  14  -5   -0.07    0.34
   1 -14   5    1.08    0.54
   1 -14   5    0.07    0.54
  -1  14  -5    0.67    1.14
  -1  14  -5    0.87    0.81
   1 -14   5   -0.27    0.81
   1 -14   5   -0.07    0.81
  -1  14  -6    0.40    0.34
  -1  14  -6   -0.07    0.67
   1 -14   6   -0.20    0.47
   1 -14   6   -0.40    0.40
  -1  14  -6    0.81    0.74
  -1  14  -6    0.87    1.08
   1 -14   6    0.27    0.74
   1 -14   6    1.08    0.81
  -1  14  -7    1.14    0.74
  -1  14  -7    1.41    0.40
   1 -14   7    2.15    0.54
   1 -14   7    1.08    0.54
  -1  14  -7    1.88    0.81
  -1  14  -7    2.02    1.14
   1 -14   7    2.29    0.87
   1 -14   7    1.35    0.81
  -1  14  -8    0.87    0.40
  -1  14  -8    0.81    0.67
   1 -14   8   -0.61    0.47
   1 -14   8    0.13    0.47
  -1  14  -8   -0.07    1.14
  -1  14  -8    0.07    0.81
   1 -14   8    0.13    0.87
   1 -14   8   -0.34    0.81
  -1  14  -9    4.44    0.87
  -1  14  -9    2.89    0.47
  -1  14  -9    3.36    1.21
  -1  14  -9    5.38    1.01
   1 -14   9    2.56    0.87
   1 -14   9    4.31    1.08
  -1  14 -10   -0.07    0.40
  -1  14 -10    0.34    0.74
   1 -14  10   -0.27    0.40
   1 -14  10    0.67    0.54
  -1  14 -10    0.34    1.08
  -1  14 -10   -0.47    0.81
   1 -14  10    0.61    0.74
   1 -14  10   -0.87    0.87
  -1  14 -11    4.04    0.87
  -1  14 -11    4.58    0.54
   1 -14  11    4.44    0.67
   1 -14  11    3.43    0.61
  -1  14 -11    4.44    1.35
  -1  14 -11    2.89    0.94
   1 -14  11    5.65    0.94
   1 -14  11    4.44    1.01
  -1  14 -12    1.35    0.74
  -1  14 -12    0.74    0.40
   1 -14  12    1.28    0.54
   1 -14  12    1.68    0.61
  -1  14 -12    0.13    1.14
  -1  14 -12    3.57    0.94
   1 -14  12    0.81    0.87
   1 -14  12    0.94    0.74
  -1  14 -13   -0.47    0.94
   1 -14  13    0.07    0.67
   1 -14  13    0.61    0.94
  -1  13  20   -0.40    0.61
  -1  13  20    0.87    0.47
   1 -13 -20    0.27    0.61
   1 -13 -20   -0.27    0.20
  -1  13  20   -0.47    1.08
  -1  13  20   -0.20    1.08
   1 -13 -20    0.74    1.08
   1 -13 -20    0.20    0.94
  -1  13  19    1.95    0.54
  -1  13  19   -0.07    0.61
  -1  13  19    1.14    1.08
   1 -13 -19    0.40    1.01
   1 -13 -19    1.01    1.01
  -1  13  18    4.71    0.61
  -1  13  18    4.44    0.81
  -1  13  18    4.31    1.21
  -1  13  18    4.17    1.28
   1 -13 -18    4.71    1.14
   1 -13 -18    4.44    1.14
  -1  13  17    2.22    0.47
  -1  13  17    1.35    0.67
  -1  13  17    1.35    0.94
  -1  13  17    2.02    1.21
   1 -13 -17    2.62    1.08
   1 -13 -17    1.41    0.94
  -1  13  16    2.49    1.01
  -1  13  16    4.10    1.21
   1 -13 -16    2.89    1.01
   1 -13 -16    4.31    1.01
  -1  13  15    1.35    0.87
  -1  13  15   -0.34    1.01
   1 -13 -15    1.35    0.87
   1 -13 -15    0.74    0.94
  -1  13  14    1.28    0.40
  -1  13  14    0.13    0.61
   1 -13 -14    0.13    0.20
   1 -13 -14   -0.13    0.40
  -1  13  14    0.81    0.87
  -1  13  14   -0.07    1.01
   1 -13 -14    1.35    0.87
   1 -13 -14    0.47    0.81
  -1  13  13    1.88    0.61
  -1  13  13    1.01    0.47
   1 -13 -13    1.61    0.47
   1 -13 -13    1.35    0.40
  -1  13  13    1.68    0.87
  -1  13  13    1.61    1.01
   1 -13 -13    0.20    0.87
   1 -13 -13    0.74    0.87
  -1  13  12    4.91    0.81
  -1  13  12    6.46    0.67
   1 -13 -12    5.45    0.61
   1 -13 -12    6.26    0.61
  -1  13  12    5.58    1.01
  -1  13  12    4.10    1.28
   1 -13 -12    6.53    1.14
   1 -13 -12    4.24    1.01
  -1  13  11    6.93    0.81
   1 -13 -11    7.87    0.67
   1 -13 -11    7.74    0.67
   1 -13 -10   42.73    1.95
   1 -13 -10   39.63    1.75
  -1  13   9    2.22    0.54
  -1  13   9    1.41    0.47
   1 -13  -9    2.29    0.47
   1 -13  -9    1.61    0.47
  -1  13   9    2.36    1.08
  -1  13   9    3.63    0.87
   1 -13  -9    1.28    0.87
   1 -13  -9    2.69    0.94
  -1  13   8    3.57    0.47
  -1  13   8    3.10    0.54
   1 -13  -8    3.97    0.47
   1 -13  -8    2.49    0.47
  -1  13   8    1.35    1.08
  -1  13   8    2.15    0.81
   1 -13  -8    2.83    0.94
   1 -13  -8    2.36    0.87
  -1  13   7    0.00    0.47
  -1  13   7    0.47    0.34
   1 -13  -7    0.54    0.40
  -1  13   7   -0.07    0.67
  -1  13   7    0.67    0.87
   1 -13  -7    0.07    0.74
   1 -13  -7    0.54    0.81
  -1  13   6   20.86    1.28
  -1  13   6   21.40    1.01
  -1  13   6   22.34    1.75
  -1  13   6   24.22    1.41
   1 -13  -6   24.16    1.61
   1 -13  -6   21.73    1.48
  -1  13   5    4.17    0.47
  -1  13   5    3.50    0.61
   1 -13  -5    4.24    0.47
   1 -13  -5    3.30    0.54
  -1  13   5    3.90    1.08
  -1  13   5    2.96    0.81
   1 -13  -5    1.95    0.87
   1 -13  -5    4.10    0.87
  -1  13   4   15.07    1.08
  -1  13   4   15.48    0.81
   1 -13  -4   14.47    0.94
   1 -13  -4   14.74    0.81
  -1  13   4   13.12    1.48
  -1  13   4   15.88    1.21
  -1  13   3    0.74    0.34
  -1  13   3   -0.47    0.54
   1 -13  -3    0.34    0.34
   1 -13  -3    0.74    0.40
  -1  13   3    0.07    0.94
  -1  13   3    0.94    0.67
   1 -13  -3    1.01    0.74
   1 -13  -3    1.55    0.81
  -1  13   2    3.30    0.40
  -1  13   2    4.78    0.74
   1 -13  -2    3.50    0.47
   1 -13  -2    4.37    0.61
  -1  13   2    5.45    0.81
  -1  13   2    3.50    1.08
   1 -13  -2    4.58    1.01
   1 -13  -2    4.51    0.94
  -1  13   1   11.24    0.67
  -1  13   1   12.38    1.08
   1 -13  -1   11.71    0.87
   1 -13  -1   11.30    0.74
  -1  13   1   11.91    1.35
  -1  13   1   12.25    1.08
   1 -13  -1   11.37    1.21
   1 -13  -1   10.77    1.21
  -1  13   0    2.69    0.74
  -1  13   0    2.62    0.40
   1 -13   0    3.30    0.47
   1 -13   0    2.29    0.54
  -1  13   0    2.36    0.74
  -1  13   0    0.87    1.01
   1 -13   0    3.03    0.87
   1 -13   0    1.21    0.81
   1 -13   1   40.44    1.88
   1 -13   1   41.31    1.82
  -1  13  -1   37.28    2.22
  -1  13  -1   37.55    1.95
   1 -13   1   37.28    1.82
   1 -13   1   41.38    2.02
  -1  13  -2    2.29    0.40
  -1  13  -2    2.69    0.74
   1 -13   2    2.62    0.54
   1 -13   2    2.49    0.47
  -1  13  -2    0.94    1.01
  -1  13  -2    3.23    0.81
   1 -13   2    2.22    0.87
   1 -13   2    1.28    0.74
  -1  13  -3    1.28    0.74
  -1  13  -3    0.87    0.34
   1 -13   3    1.55    0.47
   1 -13   3    1.08    0.47
  -1  13  -3    0.74    1.01
  -1  13  -3    0.20    0.74
   1 -13   3   -0.67    0.74
   1 -13   3    0.74    0.81
  -1  13  -4    5.92    0.54
  -1  13  -4    8.01    1.01
   1 -13   4    6.46    0.67
   1 -13   4    6.93    0.74
  -1  13  -4    6.06    1.21
  -1  13  -4    6.93    0.94
   1 -13   4    6.59    1.08
   1 -13   4    7.60    1.01
  -1  13  -5   40.57    1.75
  -1  13  -5   45.22    2.49
   1 -13   5   44.88    2.09
   1 -13   5   42.53    1.95
  -1  13  -5   38.83    1.88
  -1  13  -5   37.75    2.29
   1 -13   5   42.86    2.09
   1 -13   5   40.10    2.02
  -1  13  -6   -0.07    0.74
  -1  13  -6    0.40    1.08
   1 -13   6    0.94    0.81
   1 -13   6    0.47    0.81
  -1  13  -7   22.27    1.55
  -1  13  -7   24.49    1.21
   1 -13   7   21.26    1.28
   1 -13   7   20.25    1.28
  -1  13  -7   22.81    1.48
  -1  13  -7   27.25    2.02
   1 -13   7   23.62    1.55
   1 -13   7   22.95    1.55
  -1  13  -8    9.55    1.08
  -1  13  -8    9.02    0.67
   1 -13   8   10.16    0.87
   1 -13   8    7.81    0.81
  -1  13  -8    8.21    1.08
  -1  13  -8   10.03    1.48
   1 -13   8    8.41    1.08
   1 -13   8   10.83    1.14
  -1  13  -9    1.68    0.74
  -1  13  -9    1.21    0.47
   1 -13   9    1.41    0.54
   1 -13   9    1.08    0.61
  -1  13  -9    0.34    1.01
  -1  13  -9    2.29    0.87
   1 -13   9    1.01    0.67
   1 -13   9    1.88    0.87
  -1  13 -10    3.10    0.81
  -1  13 -10    1.88    0.47
   1 -13  10    1.75    0.47
   1 -13  10    1.82    0.54
  -1  13 -10    1.35    1.14
  -1  13 -10    3.84    0.94
   1 -13  10    2.56    0.81
   1 -13  10    2.49    0.94
  -1  13 -11    2.56    0.47
  -1  13 -11    2.09    0.81
   1 -13  11    3.43    0.61
   1 -13  11    1.95    0.54
   1 -13  11    2.36    0.81
   1 -13  11    4.51    1.08
  -1  13 -12    4.24    0.87
  -1  13 -12    4.64    0.54
   1 -13  12    4.71    0.67
   1 -13  12    5.85    0.74
  -1  13 -12    7.20    1.41
  -1  13 -12    5.05    1.01
   1 -13  12    6.39    1.08
   1 -13  12    6.59    0.94
  -1  13 -13    2.49    0.81
  -1  13 -13    1.61    0.47
   1 -13  13    1.88    0.54
   1 -13  13    0.87    0.54
  -1  13 -13    0.87    1.08
  -1  13 -13    2.56    0.87
   1 -13  13    3.36    1.01
   1 -13  13    1.21    0.67
  -1  13 -14    0.27    0.87
  -1  13 -14    1.21    1.01
   1 -13  14   -0.13    0.94
   1 -13  14    0.54    0.67
  -1  13 -15    0.61    0.94
  -1  13 -15   -0.34    1.01
   1 -13  15    1.48    0.94
   1 -13  15   -0.13    0.67
   1 -13  16    2.83    1.08
   1 -13  16    1.95    0.94
  -1  12  22    1.21    0.61
  -1  12  22    1.55    0.61
  -1  12  22    0.13    1.08
  -1  12  22    0.34    1.08
   1 -12 -22    1.48    1.08
  -1  12  21    0.94    0.54
  -1  12  21    0.94    0.67
   1 -12 -21   -0.34    0.20
   1 -12 -21    0.87    0.61
  -1  12  21    0.74    1.08
  -1  12  21   -1.21    1.01
   1 -12 -21    0.00    1.01
   1 -12 -21    1.01    0.94
  -1  12  20    0.81    0.67
  -1  12  20    0.94    0.47
   1 -12 -20    0.87    0.54
   1 -12 -20    0.34    0.27
  -1  12  20    1.48    1.14
  -1  12  20    0.61    1.08
   1 -12 -20    2.69    1.01
   1 -12 -20   -0.13    1.01
  -1  12  19   -0.40    0.61
  -1  12  19    1.21    0.47
   1 -12 -19   -0.20    0.20
   1 -12 -19    1.08    0.47
  -1  12  19    0.54    1.01
   1 -12 -19    1.55    0.94
   1 -12 -19    1.08    0.94
  -1  12  18    2.22    0.47
  -1  12  18    1.61    0.67
  -1  12  18    3.50    1.08
  -1  12  18    1.28    1.14
   1 -12 -18    4.78    1.14
   1 -12 -18    3.03    1.01
  -1  12  17    0.20    0.40
  -1  12  17   -0.20    0.61
   1 -12 -17   -0.07    0.20
   1 -12 -17    0.00    0.40
  -1  12  17    0.07    0.87
  -1  12  17   -0.54    1.01
   1 -12 -17    0.74    0.94
  -1  12  16    4.44    1.08
  -1  12  16    3.23    1.14
   1 -12 -16    2.42    1.01
   1 -12 -16    3.90    1.01
  -1  12  15   14.87    0.94
  -1  12  15   13.73    1.14
  -1  12  15   14.60    1.55
  -1  12  15   14.94    1.41
   1 -12 -15   15.07    1.41
   1 -12 -15   14.33    1.48
  -1  12  14    2.49    0.47
  -1  12  14    2.49    0.67
  -1  12  14    3.23    1.14
  -1  12  14    2.83    1.01
   1 -12 -14    1.75    1.01
   1 -12 -14    2.56    1.01
  -1  12  13    6.39    0.67
  -1  12  12    0.00    0.54
  -1  12  12    0.00    0.40
   1 -12 -12   -0.34    0.27
   1 -12 -12    0.34    0.40
  -1  12  12   -0.27    0.74
  -1  12  12   -0.27    0.94
   1 -12 -12    0.61    0.81
   1 -12 -12   -0.74    0.81
  -1  12  11    2.62    0.47
  -1  12  11    3.63    0.61
   1 -12 -11    3.30    0.47
   1 -12 -11    2.49    0.47
  -1  12  11    1.95    0.87
  -1  12  11    3.43    1.08
   1 -12 -11    3.10    0.94
   1 -12 -11    3.77    0.87
  -1  12  10    3.77    0.54
  -1  12  10    3.97    0.61
   1 -12 -10    3.70    0.54
   1 -12 -10    4.24    0.54
  -1  12  10    3.50    1.14
  -1  12  10    4.78    0.94
   1 -12 -10    3.43    0.94
   1 -12 -10    3.43    0.94
  -1  12   9   47.10    2.02
  -1  12   9   51.00    2.15
   1 -12  -9   46.16    2.02
   1 -12  -9   48.72    2.02
  -1  12   8    1.48    0.47
  -1  12   8    2.15    0.40
   1 -12  -8    1.01    0.47
  -1  12   8    2.96    0.94
  -1  12   8    1.48    0.74
   1 -12  -8    1.55    0.81
   1 -12  -8    1.35    0.81
  -1  12   7   40.44    1.68
  -1  12   7   37.61    1.75
   1 -12  -7   37.14    1.68
   1 -12  -7   35.93    1.55
  -1  12   7   41.72    2.22
  -1  12   7   41.11    1.88
   1 -12  -7   39.50    2.02
   1 -12  -7   38.49    1.82
  -1  12   6   51.68    2.22
  -1  12   6   51.61    2.09
   1 -12  -6   53.09    2.15
   1 -12  -6   52.96    2.22
  -1  12   6   49.66    2.02
  -1  12   6   54.23    2.49
   1 -12  -6   50.40    2.22
   1 -12  -6   47.10    2.02
  -1  12   5    0.20    0.40
  -1  12   5   -0.20    0.27
   1 -12  -5    0.00    0.34
   1 -12  -5    0.47    0.34
  -1  12   5    0.07    0.67
  -1  12   5    0.00    0.87
   1 -12  -5    1.08    0.74
   1 -12  -5   -0.74    0.74
  -1  12   4   68.63    2.62
  -1  12   4   69.91    2.89
   1 -12  -4   69.98    2.69
   1 -12  -4   74.62    2.96
   1 -12  -4   66.35    2.56
   1 -12  -4   66.35    2.56
  -1  12   3    2.83    0.61
  -1  12   3    2.69    0.40
   1 -12  -3    3.10    0.47
   1 -12  -3    2.15    0.47
  -1  12   3    3.43    1.01
  -1  12   3    2.09    0.74
   1 -12  -3    2.76    0.81
   1 -12  -3    3.50    0.87
  -1  12   2    0.47    0.27
  -1  12   2    1.14    0.54
   1 -12  -2    0.07    0.34
   1 -12  -2   -0.27    0.34
  -1  12   2   -0.20    0.61
  -1  12   2   -0.34    0.81
   1 -12  -2    0.00    0.67
   1 -12  -2    0.54    0.74
  -1  12   1   22.00    1.08
  -1  12   1   22.81    1.41
  -1  12   1   24.90    1.41
  -1  12   1   20.66    1.61
   1 -12  -1   24.69    1.55
   1 -12  -1   25.43    1.55
  -1  12   0   36.74    1.88
  -1  12   0   35.46    1.55
   1 -12   0   33.71    1.55
   1 -12   0   36.34    1.68
  -1  12   0   34.92    1.61
  -1  12   0   31.42    1.95
   1 -12   0   32.77    1.75
   1 -12   0   36.00    1.82
  -1  12  -1   10.09    0.94
  -1  12  -1   12.11    0.74
   1 -12   1   11.10    0.81
   1 -12   1    9.15    0.81
  -1  12  -1   11.78    1.01
  -1  12  -1   10.30    1.28
   1 -12   1    9.82    1.01
   1 -12   1   11.24    1.08
  -1  12  -2   42.80    2.15
  -1  12  -2   39.63    1.68
   1 -12   2   39.36    1.75
   1 -12   2   40.71    1.88
  -1  12  -2   34.99    2.09
  -1  12  -2   38.02    1.95
   1 -12   2   42.32    1.95
   1 -12   2   38.76    1.82
  -1  12  -3   -0.07    0.67
  -1  12  -3   -0.13    0.34
   1 -12   3    0.07    0.40
   1 -12   3    0.54    0.40
  -1  12  -3    0.47    0.94
  -1  12  -3   -0.27    0.67
   1 -12   3   -0.54    0.74
   1 -12   3    0.87    0.67
  -1  12  -4   26.04    1.21
  -1  12  -4   27.32    1.68
   1 -12   4   25.50    1.35
   1 -12   4   26.04    1.41
  -1  12  -4   24.83    1.75
  -1  12  -4   24.16    1.41
   1 -12   4   25.97    1.55
   1 -12   4   23.28    1.48
  -1  12  -5    0.13    0.34
  -1  12  -5    0.54    0.67
   1 -12   5    0.27    0.40
   1 -12   5   -0.20    0.47
  -1  12  -5   -1.21    0.67
  -1  12  -5    0.87    0.94
   1 -12   5    1.01    0.81
   1 -12   5    0.20    0.67
  -1  12  -6   11.30    0.74
  -1  12  -6   10.16    1.01
   1 -12   6    9.89    0.81
   1 -12   6    9.82    0.81
  -1  12  -6   11.78    1.08
  -1  12  -6    8.28    1.21
   1 -12   6   10.70    1.08
   1 -12   6   12.85    1.28
  -1  12  -7    0.47    0.40
  -1  12  -7    0.34    0.61
   1 -12   7    0.07    0.40
   1 -12   7   -0.61    0.47
  -1  12  -7    0.81    1.01
  -1  12  -7    0.61    0.74
   1 -12   7    0.61    0.81
   1 -12   7   -0.34    0.67
  -1  12  -8   10.70    1.41
  -1  12  -8    8.81    1.08
   1 -12   8    9.89    1.14
   1 -12   8    8.55    1.01
  -1  12  -9   21.06    1.48
  -1  12  -9   20.05    1.08
   1 -12   9   20.59    1.21
   1 -12   9   21.33    1.28
  -1  12  -9   23.62    1.82
  -1  12  -9   22.47    1.48
   1 -12   9   19.38    1.28
   1 -12   9   21.87    1.55
  -1  12 -10   17.16    1.01
  -1  12 -10   16.42    1.35
   1 -12  10   18.24    1.21
   1 -12  10   17.63    1.14
  -1  12 -10   17.76    1.35
  -1  12 -10   19.65    1.68
   1 -12  10   18.37    1.48
   1 -12  10   16.82    1.21
  -1  12 -11    0.34    0.40
  -1  12 -11   -0.20    0.61
   1 -12  11    0.67    0.54
   1 -12  11    0.67    0.40
  -1  12 -11    0.87    0.87
  -1  12 -11    1.01    1.01
   1 -12  11    1.28    0.67
   1 -12  11    1.41    0.87
  -1  12 -12    0.00    0.67
  -1  12 -12    0.20    0.34
   1 -12  12    0.81    0.47
   1 -12  12   -0.54    0.47
  -1  12 -12   -0.20    1.01
  -1  12 -12    1.14    0.87
   1 -12  12   -0.13    0.67
   1 -12  12    0.40    0.87
  -1  12 -13   23.42    1.28
  -1  12 -13   22.81    1.61
   1 -12  13   24.83    1.48
   1 -12  13   23.48    1.35
  -1  12 -13   26.58    1.68
  -1  12 -13   23.48    1.88
   1 -12  13   25.17    1.55
   1 -12  13   27.25    1.82
  -1  12 -14    8.75    0.74
  -1  12 -14    8.01    1.08
   1 -12  14    8.01    0.74
   1 -12  14    8.88    0.94
  -1  12 -14    8.55    1.41
  -1  12 -14    8.07    1.08
   1 -12  14   11.44    1.28
   1 -12  14    7.74    1.01
  -1  12 -15    4.84    0.61
   1 -12  15    3.90    0.74
  -1  12 -15    5.11    1.21
  -1  12 -15    6.06    1.08
   1 -12  15    4.71    0.87
   1 -12  15    6.33    1.21
  -1  12 -16    1.21    0.87
  -1  12 -16    0.61    1.01
   1 -12  16    1.61    0.74
   1 -12  16    2.62    0.94
   1 -12  17   -0.34    0.94
   1 -12  17    2.22    0.81
  -1  11  23    0.20    0.54
  -1  11  23    2.09    0.61
   1 -11 -23    1.82    0.67
   1 -11 -23    0.20    0.20
  -1  11  23    1.08    1.14
  -1  11  23   -1.88    1.08
   1 -11 -23    0.27    1.14
   1 -11 -23   -0.81    1.08
  -1  11  22    0.34    0.47
  -1  11  22   -0.20    0.61
   1 -11 -22   -0.07    0.20
   1 -11 -22    0.34    0.54
  -1  11  22    0.00    1.01
  -1  11  22   -0.07    1.01
   1 -11 -22   -0.34    1.01
   1 -11 -22   -0.67    0.94
  -1  11  21   -0.40    0.61
  -1  11  21   -0.07    0.40
   1 -11 -21    0.67    0.47
   1 -11 -21    0.40    0.27
  -1  11  21    1.35    1.01
  -1  11  21    1.28    0.94
   1 -11 -21    0.13    1.01
   1 -11 -21    0.40    1.08
  -1  11  20   -0.07    0.61
  -1  11  20    1.14    0.40
   1 -11 -20   -0.07    2.42
   1 -11 -20    1.82    0.47
  -1  11  20    0.13    1.01
  -1  11  20    1.75    1.08
   1 -11 -20    0.61    1.01
   1 -11 -20    2.02    1.01
  -1  11  19   -0.74    0.40
  -1  11  19    0.07    0.61
   1 -11 -19   -0.67    0.40
   1 -11 -19    0.13    0.20
  -1  11  19    0.87    1.08
  -1  11  19   -0.34    0.94
   1 -11 -19    0.07    1.01
   1 -11 -19   -1.01    0.94
  -1  11  18    5.32    0.81
  -1  11  18    6.66    0.61
  -1  11  18    5.38    1.21
  -1  11  18    5.65    1.21
   1 -11 -18    6.86    1.14
   1 -11 -18    5.52    1.14
  -1  11  17    0.13    1.01
  -1  11  17    3.36    1.01
   1 -11 -17    2.49    1.01
  -1  11  16    1.21    0.61
  -1  11  16    0.81    0.40
   1 -11 -16   -0.07    0.40
   1 -11 -16    0.27    0.20
  -1  11  16   -0.13    1.01
  -1  11  16    0.61    0.87
   1 -11 -16    0.87    0.87
   1 -11 -16   -0.61    0.87
  -1  11  15   12.85    1.08
  -1  11  15   12.45    0.81
  -1  11  14   13.93    0.87
  -1  11  14   17.97    1.68
  -1  11  14   18.10    1.48
   1 -11 -14   16.01    1.41
   1 -11 -14   17.83    1.41
  -1  11  13    0.87    0.54
  -1  11  13    0.54    0.40
   1 -11 -13    0.27    0.20
   1 -11 -13    0.74    0.40
  -1  11  13    0.54    0.81
  -1  11  13    1.08    0.94
   1 -11 -13    1.01    0.87
   1 -11 -13    0.81    0.81
  -1  11  12   15.68    0.94
  -1  11  12   16.75    1.08
  -1  11  12   16.35    1.35
  -1  11  12   15.75    1.48
   1 -11 -12   17.09    1.41
   1 -11 -12   16.22    1.28
  -1  11  11    5.92    0.67
  -1  11  11    6.19    0.61
  -1  11  11    5.92    0.94
  -1  11  11    5.11    1.14
   1 -11 -11    5.05    0.94
   1 -11 -11    5.85    1.01
  -1  11  10   28.40    1.35
  -1  11  10   31.09    1.41
   1 -11 -10   28.60    1.35
  -1  11  10   26.65    1.88
  -1  11  10   29.40    1.61
   1 -11 -10   29.88    1.68
   1 -11 -10   28.40    1.68
  -1  11   9   29.94    1.41
  -1  11   9   29.47    1.41
   1 -11  -9   31.49    1.41
  -1  11   9   26.11    1.82
  -1  11   9   27.05    1.55
   1 -11  -9   29.47    1.61
   1 -11  -9   27.32    1.61
  -1  11   8    4.58    0.54
  -1  11   8    3.63    0.47
   1 -11  -8    4.24    0.54
   1 -11  -8    4.04    0.47
  -1  11   8    3.84    0.81
  -1  11   8    2.42    0.94
   1 -11  -8    1.88    0.81
   1 -11  -8    3.90    0.87
  -1  11   7    0.07    0.34
  -1  11   7    0.20    0.40
   1 -11  -7    0.20    0.34
   1 -11  -7    0.47    0.34
  -1  11   7   -0.13    0.74
  -1  11   7   -0.34    0.74
   1 -11  -7   -0.81    0.74
   1 -11  -7    0.54    0.74
  -1  11   6   51.95    2.09
  -1  11   6   47.03    2.02
   1 -11  -6   47.03    1.95
   1 -11  -6   51.41    2.09
  -1  11   6   50.26    2.29
  -1  11   6   46.77    1.95
   1 -11  -6   44.07    1.95
   1 -11  -6   49.99    2.15
  -1  11   5    0.94    0.34
  -1  11   5    0.74    0.47
   1 -11  -5    0.94    0.34
   1 -11  -5    0.94    0.40
  -1  11   5   -0.27    0.81
  -1  11   5    1.21    0.67
   1 -11  -5    1.61    0.74
   1 -11  -5    0.94    0.74
  -1  11   4  117.82    4.51
  -1  11   4  118.09    4.37
   1 -11  -4  115.13    4.37
   1 -11  -4  114.66    4.24
  -1  11   4  113.85    3.43
  -1  11   4  121.45    3.97
   1 -11  -4  118.02    3.70
   1 -11  -4  107.32    3.43
  -1  11   3  105.44    4.10
  -1  11   3  106.32    3.97
   1 -11  -3  110.55    4.24
   1 -11  -3  109.54    4.10
  -1  11   3   92.59    3.30
  -1  11   3   98.85    3.10
   1 -11  -3  103.96    3.30
   1 -11  -3   97.70    3.23
  -1  11   2   21.20    1.01
  -1  11   2   19.24    1.14
   1 -11  -2   21.40    1.08
   1 -11  -2   18.98    1.08
  -1  11   2   16.96    1.14
  -1  11   2   19.31    1.41
   1 -11  -2   17.29    1.28
   1 -11  -2   17.83    1.28
  -1  11   1  244.52    8.81
  -1  11   1  247.75    9.15
   1 -11  -1  239.55    8.81
   1 -11  -1  250.85    9.08
  -1  11   1  240.76    6.33
  -1  11   1  242.10    6.66
   1 -11  -1  239.88    6.39
   1 -11  -1  238.00    6.39
  -1  11   0   29.88    1.61
  -1  11   0   31.09    1.35
   1 -11   0   27.99    1.35
   1 -11   0   25.70    1.28
  -1  11   0   27.92    1.41
  -1  11   0   25.37    1.61
   1 -11   0   25.43    1.48
   1 -11   0   23.55    1.41
  -1  11  -1  101.81    4.10
  -1  11  -1   95.08    3.57
   1 -11   1  103.29    3.97
   1 -11   1  104.83    3.97
  -1  11  -1   94.74    3.30
  -1  11  -1  105.78    3.16
   1 -11   1  102.68    3.23
   1 -11   1  107.19    3.36
  -1  11  -2    0.61    0.61
  -1  11  -2    0.54    0.34
   1 -11   2    0.40    0.40
   1 -11   2    0.94    0.40
  -1  11  -2    0.61    0.61
  -1  11  -2    1.21    0.81
   1 -11   2    0.67    0.67
   1 -11   2    1.08    0.61
  -1  11  -3   34.05    1.48
  -1  11  -3   35.26    1.88
   1 -11   3   34.25    1.61
   1 -11   3   33.64    1.61
  -1  11  -3   33.04    1.88
   1 -11   3   28.19    1.48
   1 -11   3   33.17    1.68
  -1  11  -4    0.40    0.61
  -1  11  -4    0.61    0.34
   1 -11   4    0.34    0.40
   1 -11   4    0.40    0.40
  -1  11  -4    1.75    0.67
  -1  11  -4   -0.81    0.87
   1 -11   4    0.27    0.61
   1 -11   4    0.47    0.67
  -1  11  -5  144.53    5.72
  -1  11  -5  139.08    5.18
   1 -11   5  149.24    5.65
   1 -11   5  135.92    5.18
  -1  11  -5  141.17    4.10
  -1  11  -5  130.20    4.24
   1 -11   5  131.95    3.97
   1 -11   5  140.77    4.24
  -1  11  -6   21.67    1.08
  -1  11  -6   22.95    1.48
   1 -11   6   22.34    1.28
   1 -11   6   22.41    1.21
  -1  11  -6   18.84    1.55
  -1  11  -6   20.59    1.28
   1 -11   6   23.42    1.41
   1 -11   6   24.56    1.48
  -1  11  -7   16.75    1.28
  -1  11  -7   16.89    0.94
   1 -11   7   18.50    1.14
   1 -11   7   16.69    1.08
  -1  11  -7   18.64    1.28
  -1  11  -7   14.87    1.48
   1 -11   7   17.49    1.35
   1 -11   7   16.69    1.21
  -1  11  -8   48.25    2.36
  -1  11  -8   45.28    1.95
   1 -11   8   51.41    2.29
   1 -11   8   48.99    2.22
  -1  11  -8   46.43    1.95
  -1  11  -8   51.14    2.49
   1 -11   8   47.71    1.95
   1 -11   8   54.30    2.29
  -1  11  -9   18.77    1.01
   1 -11   9   17.97    1.14
  -1  11  -9   17.09    1.28
  -1  11  -9   16.69    1.48
   1 -11   9   18.44    1.48
   1 -11   9   17.49    1.21
  -1  11 -10   51.74    2.22
  -1  11 -10   56.52    2.76
   1 -11  10   58.54    2.49
   1 -11  10   53.63    2.49
  -1  11 -10   50.94    2.15
  -1  11 -10   55.11    2.62
   1 -11  10   56.59    2.22
   1 -11  10   55.04    2.42
  -1  11 -11   12.18    1.14
  -1  11 -11   14.47    0.94
   1 -11  11   15.88    1.14
   1 -11  11   13.73    0.94
  -1  11 -11   13.32    1.08
  -1  11 -11   17.09    1.55
   1 -11  11   14.87    1.35
   1 -11  11   15.14    1.14
  -1  11 -12   35.46    1.68
  -1  11 -12   33.71    1.95
   1 -11  12   34.38    1.82
   1 -11  12   36.27    1.75
  -1  11 -12   36.20    2.15
  -1  11 -12   33.44    1.75
   1 -11  12   37.08    1.75
   1 -11  12   34.38    1.95
  -1  11 -13    0.74    0.40
  -1  11 -13    1.21    0.67
   1 -11  13   -0.61    0.54
   1 -11  13    0.81    0.40
  -1  11 -13   -0.74    0.87
  -1  11 -13    0.94    0.74
   1 -11  13    0.13    0.87
   1 -11  13    0.40    0.61
  -1  11 -14   20.72    1.21
  -1  11 -14   18.84    1.41
   1 -11  14   22.21    1.48
   1 -11  14   20.32    1.14
  -1  11 -14   20.32    1.41
  -1  11 -14   20.19    1.75
   1 -11  14   20.46    1.55
   1 -11  14   18.50    1.28
  -1  11 -15    0.67    0.74
  -1  11 -15    1.01    0.47
   1 -11  15    1.08    0.40
   1 -11  15    1.55    0.61
  -1  11 -15    2.22    0.74
  -1  11 -15    1.21    1.08
   1 -11  15    0.34    0.87
   1 -11  15   -0.20    0.67
  -1  11 -16   24.96    1.82
  -1  11 -16   29.88    1.55
   1 -11  16   28.26    1.48
   1 -11  16   25.43    1.55
  -1  11 -16   23.15    2.02
  -1  11 -16   25.64    1.61
   1 -11  16   25.23    1.88
   1 -11  16   27.25    1.68
  -1  11 -17   -1.01    0.94
  -1  11 -17    0.74    0.67
   1 -11  17    0.87    0.67
   1 -11  17   -0.47    0.81
  -1  10  23   -0.20    0.54
  -1  10  23   -0.13    0.54
   1 -10 -23   -0.07    0.20
   1 -10 -23    0.61    0.54
  -1  10  23    1.68    1.14
  -1  10  23   -0.94    1.08
   1 -10 -23   -0.40    1.01
   1 -10 -23    0.67    1.08
  -1  10  22    0.94    0.61
  -1  10  22    1.35    0.47
   1 -10 -22    0.07    0.20
   1 -10 -22    1.61    0.54
  -1  10  22    1.55    1.01
  -1  10  22   -0.34    1.01
   1 -10 -22    1.48    1.01
   1 -10 -22    0.67    1.08
  -1  10  21    0.00    0.40
  -1  10  21    0.07    0.61
   1 -10 -21   -0.13    0.20
   1 -10 -21    0.34    0.47
  -1  10  21    0.13    1.01
  -1  10  21   -0.94    0.94
   1 -10 -21    0.67    0.87
   1 -10 -21   -0.13    1.01
  -1  10  20    7.40    0.67
  -1  10  20    6.06    0.87
  -1  10  20    6.46    1.28
  -1  10  20    4.98    1.35
   1 -10 -20    5.65    1.28
   1 -10 -20    4.98    1.21
  -1  10  19    7.07    0.61
  -1  10  19    6.26    0.87
  -1  10  19    6.06    1.14
  -1  10  19    7.60    1.28
   1 -10 -19    6.19    1.14
   1 -10 -19    7.33    1.28
   1 -10 -18    2.36    0.61
  -1  10  18    3.36    1.14
   1 -10 -18    1.88    0.87
   1 -10 -18    2.83    1.08
  -1  10  17    0.54    0.54
  -1  10  17    0.20    0.34
   1 -10 -17   -0.07    0.20
   1 -10 -17   -0.74    0.40
  -1  10  17    0.13    1.01
   1 -10 -17    0.67    0.87
  -1  10  16    1.08    0.40
  -1  10  16    0.13    0.54
   1 -10 -16   -0.07    0.20
   1 -10 -16    0.00    0.40
  -1  10  16   -1.21    0.87
  -1  10  16    1.01    0.94
   1 -10 -16    0.81    0.87
  -1  10  15    3.10    0.54
  -1  10  15    3.63    1.08
  -1  10  15    3.57    1.01
   1 -10 -15    2.76    0.87
   1 -10 -15    3.84    0.94
  -1  10  14   24.56    1.41
  -1  10  14   24.29    1.21
  -1  10  14   22.27    1.55
  -1  10  14   22.81    1.68
   1 -10 -14   19.51    1.55
   1 -10 -14   22.54    1.55
  -1  10  13   31.09    1.61
  -1  10  13   31.02    1.41
  -1  10  13   30.68    1.75
  -1  10  13   29.27    1.82
  -1  10  12    4.98    0.61
  -1  10  12    4.44    0.47
  -1  10  12    3.10    0.87
  -1  10  12    3.50    0.94
   1 -10 -12    3.97    0.94
   1 -10 -12    4.98    0.94
  -1  10  11   34.59    1.48
  -1  10  11   31.15    1.48
  -1  10  11   32.84    1.82
  -1  10  11   30.62    1.68
   1 -10 -11   30.82    1.61
   1 -10 -11   32.03    1.75
  -1  10  10    0.13    0.40
  -1  10  10    0.20    0.40
   1 -10 -10    0.13    0.20
   1 -10 -10   -0.47    0.34
  -1  10  10    0.00    0.67
  -1  10  10    0.20    0.81
   1 -10 -10   -0.40    0.67
   1 -10 -10    0.67    0.74
  -1  10   9   72.47    2.83
  -1  10   9   72.60    2.83
   1 -10  -9   71.12    2.76
   1 -10  -9   72.81    2.83
  -1  10   9   74.02    2.89
  -1  10   9   80.27    2.76
   1 -10  -9   73.07    2.62
   1 -10  -9   71.93    2.62
  -1  10   8    6.39    0.54
  -1  10   8    5.32    0.54
   1 -10  -8    5.38    0.47
   1 -10  -8    5.18    0.54
  -1  10   8    4.84    1.01
  -1  10   8    4.91    0.87
   1 -10  -8    2.62    0.81
   1 -10  -8    5.65    0.94
  -1  10   7    2.76    0.47
  -1  10   7    2.89    0.40
   1 -10  -7    2.96    0.40
   1 -10  -7    2.02    0.40
  -1  10   7    2.96    0.74
  -1  10   7    2.62    0.81
   1 -10  -7    3.36    0.87
   1 -10  -7    2.02    0.81
  -1  10   6   26.38    1.21
  -1  10   6   25.50    1.14
   1 -10  -6   27.79    1.28
   1 -10  -6   24.90    1.14
  -1  10   6   22.47    1.55
  -1  10   6   23.35    1.35
   1 -10  -6   23.69    1.41
   1 -10  -6   24.22    1.41
  -1  10   5   51.68    2.15
  -1  10   5   54.57    2.15
   1 -10  -5   56.52    2.22
   1 -10  -5   55.24    2.22
  -1  10   5   52.48    2.22
  -1  10   5   56.39    2.09
   1 -10  -5   53.96    2.15
   1 -10  -5   52.82    2.09
   1 -10  -4  116.21    4.37
   1 -10  -4  118.02    4.37
   1 -10  -4  121.59    3.70
   1 -10  -4  120.51    3.70
  -1  10   3   34.25    1.41
  -1  10   3   31.49    1.48
   1 -10  -3   33.71    1.41
   1 -10  -3   33.71    1.48
  -1  10   3   31.49    1.48
  -1  10   3   29.20    1.75
   1 -10  -3   28.26    1.55
   1 -10  -3   30.55    1.61
  -1  10   2   -0.07    0.40
  -1  10   2   -0.07    0.27
   1 -10  -2    0.40    0.34
   1 -10  -2    0.27    0.34
  -1  10   2    0.94    0.61
  -1  10   2    0.13    0.67
   1 -10  -2   -0.67    0.74
   1 -10  -2    1.01    0.67
  -1  10   1    0.34    0.47
  -1  10   1    0.94    0.34
   1 -10  -1    0.87    0.40
   1 -10  -1    0.27    0.34
  -1  10   1    1.08    0.74
  -1  10   1    0.34    0.61
   1 -10  -1   -0.13    0.67
   1 -10  -1    0.40    0.67
   1 -10   0  200.85    7.33
   1 -10   0  203.41    7.47
  -1  10   0  201.26    5.58
  -1  10   0  203.61    5.38
   1 -10   0  204.49    5.52
   1 -10   0  207.79    5.58
  -1  10  -1   16.69    0.81
  -1  10  -1   16.75    1.14
   1 -10   1   17.97    1.01
   1 -10   1   15.61    0.87
  -1  10  -1   16.22    1.08
  -1  10  -1   16.42    1.28
   1 -10   1   17.56    1.14
   1 -10   1   15.01    1.14
  -1  10  -2   66.48    2.56
  -1  10  -2   67.49    2.89
   1 -10   2   69.78    2.83
   1 -10   2   66.95    2.69
  -1  10  -2   63.65    2.22
  -1  10  -2   65.74    2.49
   1 -10   2   65.67    2.36
   1 -10   2   67.29    2.42
  -1  10  -3   41.99    2.02
  -1  10  -3   37.48    1.55
   1 -10   3   39.83    1.75
   1 -10   3   41.11    1.82
  -1  10  -3   40.31    1.68
  -1  10  -3   40.91    1.95
   1 -10   3   38.89    1.75
   1 -10   3   38.89    1.68
  -1  10  -4   37.08    1.61
  -1  10  -4   35.26    1.88
   1 -10   4   37.21    1.68
   1 -10   4   36.07    1.68
  -1  10  -4   32.50    1.82
   1 -10   4   35.33    1.61
   1 -10   4   33.58    1.61
  -1  10  -5   91.92    3.50
   1 -10   5   94.67    3.70
   1 -10   5   97.10    3.84
  -1  10  -5  106.92    3.50
  -1  10  -5   98.58    3.03
   1 -10   5   98.64    3.10
   1 -10   5  100.19    3.23
  -1  10  -6   54.71    2.22
  -1  10  -6   54.84    2.49
   1 -10   6   55.78    2.36
   1 -10   6   49.73    2.15
  -1  10  -6   54.37    2.36
  -1  10  -6   59.62    2.15
   1 -10   6   59.75    2.29
   1 -10   6   55.11    2.09
  -1  10  -7    4.84    0.74
  -1  10  -7    4.98    0.47
   1 -10   7    3.57    0.54
   1 -10   7    4.98    0.61
  -1  10  -7    4.98    0.81
  -1  10  -7    4.31    1.01
   1 -10   7    4.71    0.87
   1 -10   7    4.04    0.74
  -1  10  -8   45.02    1.88
  -1  10  -8   44.81    2.22
   1 -10   8   45.69    2.09
   1 -10   8   46.43    2.09
  -1  10  -8   40.84    1.75
  -1  10  -8   37.14    1.95
   1 -10   8   43.40    1.82
   1 -10   8   44.34    2.02
   1 -10   9   78.12    3.16
   1 -10   9   75.43    3.16
  -1  10  -9   72.20    2.83
  -1  10  -9   71.86    2.49
   1 -10   9   73.34    2.56
   1 -10   9   73.21    2.69
  -1  10 -10  248.23    9.15
  -1  10 -10  243.99    9.29
   1 -10  10  251.19    9.29
   1 -10  10  246.01    9.15
  -1  10 -10  240.22    6.39
  -1  10 -10  243.92    6.86
   1 -10  10  254.95    6.73
   1 -10  10  250.11    6.86
  -1  10 -11  152.95    6.19
   1 -10  11  157.72    6.12
  -1  10 -11  157.92    4.98
  -1  10 -11  158.19    4.58
   1 -10  11  167.41    4.98
   1 -10  11  157.92    4.51
  -1  10 -12   -0.07    0.40
  -1  10 -12   -0.40    0.61
   1 -10  12    0.27    0.54
   1 -10  12    0.40    0.40
  -1  10 -12   -0.47    0.61
  -1  10 -12    1.01    0.87
   1 -10  12   -0.34    0.54
   1 -10  12    0.74    0.81
  -1  10 -13   70.38    2.89
  -1  10 -13   68.84    3.16
   1 -10  13   72.67    2.96
   1 -10  13   76.30    3.30
  -1  10 -13   71.26    3.10
  -1  10 -13   67.42    2.56
   1 -10  13   65.00    2.76
   1 -10  13   65.74    2.42
  -1  10 -14   -0.13    0.40
  -1  10 -14   -0.07    0.67
   1 -10  14    0.54    0.61
   1 -10  14    0.13    0.40
  -1  10 -14    0.67    0.67
  -1  10 -14    0.87    0.94
   1 -10  14    1.08    0.61
   1 -10  14   -0.67    0.81
  -1  10 -15    0.74    0.40
  -1  10 -15    0.61    0.67
   1 -10  15    0.87    0.40
   1 -10  15    0.47    0.61
  -1  10 -15    1.28    1.01
  -1  10 -15    0.20    0.67
   1 -10  15    0.74    0.81
   1 -10  15    1.55    0.74
  -1  10 -16    0.74    0.47
  -1  10 -16    0.40    0.74
   1 -10  16    1.08    0.61
   1 -10  16    1.14    0.40
  -1  10 -16   -0.27    1.01
  -1  10 -16    0.67    0.67
   1 -10  16    0.07    0.67
   1 -10  16    2.09    0.94
  -1  10 -17   30.62    1.61
  -1  10 -17   26.44    1.82
   1 -10  17   26.18    1.35
   1 -10  17   28.53    1.68
   1 -10  17   27.12    1.75
   1 -10  17   29.27    2.02
  -1  10 -18   -0.74    1.01
  -1  10 -18    0.94    0.67
   1 -10  18    0.34    0.74
   1 -10  18    1.68    0.94
   1 -10  19    8.81    1.28
   1 -10  19   10.70    1.28
  -1   9  24    1.28    0.47
  -1   9  24    0.40    0.54
   1  -9 -24   -0.07    0.61
   1  -9 -24   -0.13    0.20
  -1   9  24   -1.68    1.08
  -1   9  24   -1.14    1.01
   1  -9 -24    0.07    1.08
   1  -9 -24    2.09    1.14
  -1   9  23    2.02    0.74
  -1   9  23    1.48    0.54
  -1   9  23    1.21    1.14
  -1   9  23    0.00    1.01
   1  -9 -23    2.56    1.21
   1  -9 -23    2.49    1.08
  -1   9  22    0.27    0.67
  -1   9  22    0.87    0.40
   1  -9 -22    1.21    0.54
   1  -9 -22   -0.20    0.20
  -1   9  22    0.47    1.14
  -1   9  22    1.35    0.94
   1  -9 -22    0.87    1.01
   1  -9 -22   -0.13    1.01
  -1   9  21    0.54    0.40
  -1   9  21    0.81    0.61
   1  -9 -21    0.67    0.47
   1  -9 -21   -0.07    0.20
  -1   9  21    0.40    1.01
  -1   9  21   -0.40    1.01
   1  -9 -21    0.67    0.94
   1  -9 -21    0.40    1.01
  -1   9  20    1.08    0.61
  -1   9  20    0.20    0.40
   1  -9 -20    0.07    0.20
   1  -9 -20    0.00    0.47
  -1   9  20   -0.13    0.87
  -1   9  20    0.07    1.08
   1  -9 -20   -0.13    0.87
   1  -9 -20   -0.20    0.94
  -1   9  19    0.61    0.40
  -1   9  19    1.01    0.61
   1  -9 -19    1.21    0.47
   1  -9 -19   -0.07    0.20
  -1   9  19    1.21    1.08
  -1   9  19    0.20    1.01
   1  -9 -19    0.07    1.08
   1  -9 -19    1.68    0.81
  -1   9  18    0.54    0.40
  -1   9  18    1.35    0.61
   1  -9 -18    1.01    0.34
  -1   9  17   -0.34    0.54
  -1   9  17    0.74    0.40
   1  -9 -17    0.27    0.20
   1  -9 -17    0.61    0.40
  -1   9  17   -0.81    0.94
  -1   9  17    0.40    0.87
   1  -9 -17   -0.81    0.81
   1  -9 -17    0.40    0.87
  -1   9  16   10.63    0.74
  -1   9  16   11.51    1.35
  -1   9  16   11.84    1.28
   1  -9 -16    9.82    1.21
  -1   9  15    5.58    0.74
  -1   9  15    4.64    0.47
  -1   9  15    4.24    0.94
  -1   9  15    4.10    0.94
   1  -9 -15    5.52    0.94
   1  -9 -15    6.39    1.01
  -1   9  14   26.98    1.21
  -1   9  14   24.56    1.35
  -1   9  14   24.36    1.61
  -1   9  14   25.84    1.68
   1  -9 -14   23.55    1.55
   1  -9 -14   25.64    1.61
  -1   9  13    1.14    0.34
  -1   9  13    1.55    0.54
  -1   9  13    3.36    0.94
  -1   9  13    1.82    0.87
   1  -9 -13    0.94    0.74
   1  -9 -13    1.28    0.74
  -1   9  12    4.10    0.61
  -1   9  12    4.98    0.47
  -1   9  12    4.44    0.94
  -1   9  12    3.50    0.87
   1  -9 -12    5.32    0.87
   1  -9 -12    3.50    0.87
  -1   9  11    0.94    0.34
  -1   9  11    0.40    0.47
   1  -9 -11    0.54    0.34
   1  -9 -11   -0.13    0.13
  -1   9  11    1.55    0.74
  -1   9  11    0.34    0.74
   1  -9 -11    1.14    0.74
   1  -9 -11    1.01    0.74
  -1   9  10    3.63    0.47
  -1   9  10    3.30    0.40
  -1   9  10    4.17    0.94
  -1   9  10    3.90    0.81
   1  -9 -10    4.10    0.87
   1  -9 -10    4.58    0.81
  -1   9   9    4.91    0.54
  -1   9   9    4.51    0.47
  -1   9   9    5.45    0.94
  -1   9   9    3.70    0.81
   1  -9  -9    5.11    0.87
   1  -9  -9    5.18    0.87
  -1   9   8  177.57    6.53
  -1   9   8  179.26    6.53
   1  -9  -8  178.72    6.53
   1  -9  -8  176.90    6.46
  -1   9   8  189.48    5.18
  -1   9   8  182.15    5.25
   1  -9  -8  198.03    5.45
   1  -9  -8  184.84    5.11
  -1   9   7    2.09    0.40
  -1   9   7    1.35    0.40
   1  -9  -7    0.94    0.34
   1  -9  -7    0.87    0.34
  -1   9   7    0.67    0.74
  -1   9   7    2.56    0.74
   1  -9  -7    1.82    0.67
   1  -9  -7    1.08    0.74
  -1   9   6   74.69    2.89
   1  -9  -6   75.30    2.89
  -1   9   6   71.39    2.42
  -1   9   6   67.22    2.49
   1  -9  -6   64.60    2.29
   1  -9  -6   69.91    2.42
   1  -9  -5   73.14    2.49
   1  -9  -5   69.71    2.42
  -1   9   4  335.83    8.41
  -1   9   4  332.20    8.55
   1  -9  -4  336.37    8.55
   1  -9  -4  349.90    8.81
  -1   9   3    4.71    0.81
  -1   9   3    4.10    0.74
   1  -9  -3    6.73    0.94
   1  -9  -3    4.78    0.81
  -1   9   2    8.01    0.94
  -1   9   2    9.15    0.87
   1  -9  -2   10.63    1.01
   1  -9  -2    8.55    0.87
  -1   9   1    5.85    0.67
   1  -9  -1    5.58    0.54
  -1   9   1    6.33    0.81
  -1   9   1    5.65    0.87
   1  -9  -1    5.25    0.87
   1  -9  -1    4.98    0.74
  -1   9   0   66.82    2.76
  -1   9   0   67.83    2.62
   1  -9   0   66.95    2.62
   1  -9   0   69.31    2.69
  -1   9   0   61.70    2.22
  -1   9   0   64.19    2.22
   1  -9   0   63.99    2.29
   1  -9   0   61.90    2.15
  -1   9  -1    0.81    0.47
  -1   9  -1    0.81    0.34
   1  -9   1    0.67    0.34
   1  -9   1    0.34    0.40
  -1   9  -1    1.14    0.74
   1  -9   1    0.07    0.61
   1  -9   2   13.66    0.81
   1  -9   2   14.13    0.87
  -1   9  -2   13.32    1.14
   1  -9   2   14.27    1.01
  -1   9  -3   22.21    1.35
  -1   9  -3   25.91    1.14
   1  -9   3   25.43    1.21
   1  -9   3   23.55    1.21
  -1   9  -3   22.14    1.35
   1  -9   3   23.69    1.21
  -1   9  -4    7.74    0.87
  -1   9  -4    7.00    0.54
   1  -9   4    7.54    0.67
   1  -9   4    7.67    0.74
  -1   9  -4    8.41    1.01
  -1   9  -4    9.69    1.01
   1  -9   4    8.75    0.87
   1  -9   4   10.09    1.01
  -1   9  -5   36.27    1.75
  -1   9  -5   37.01    1.61
   1  -9   5   40.37    1.75
   1  -9   5   36.27    1.68
   1  -9   5   35.93    1.61
   1  -9   5   33.44    1.48
  -1   9  -6   56.79    2.29
  -1   9  -6   59.01    2.56
   1  -9   6   57.93    2.42
   1  -9   6   56.52    2.42
  -1   9  -6   59.21    2.29
  -1   9  -6   58.74    2.02
   1  -9   6   62.04    2.15
   1  -9   6   58.47    2.15
  -1   9  -7    0.81    0.34
  -1   9  -7    0.94    0.54
   1  -9   7   -0.40    0.40
   1  -9   7    0.74    0.40
  -1   9  -7    0.74    0.81
  -1   9  -7    1.01    0.54
   1  -9   7    0.40    0.67
   1  -9   7    0.47    0.54
  -1   9  -8   46.23    2.22
  -1   9  -8   49.46    2.09
   1  -9   8   51.41    2.22
   1  -9   8   48.85    2.22
  -1   9  -8   50.13    2.15
  -1   9  -8   51.68    1.88
   1  -9   8   54.23    2.15
   1  -9   8   49.59    1.88
  -1   9  -9    1.14    0.40
  -1   9  -9    0.40    0.61
   1  -9   9    0.27    0.40
   1  -9   9   -0.20    0.47
  -1   9  -9   -0.07    0.74
  -1   9  -9    0.13    0.54
   1  -9   9    1.14    0.54
   1  -9   9    0.34    0.67
  -1   9 -10    0.40    0.40
  -1   9 -10   -0.40    0.61
   1  -9  10    0.81    0.54
   1  -9  10    0.74    0.40
  -1   9 -10    0.40    0.61
  -1   9 -10   -0.61    0.81
   1  -9  10    0.34    0.54
   1  -9  10    0.07    0.74
  -1   9 -11   40.10    2.15
  -1   9 -11   41.45    1.82
   1  -9  11   44.75    1.95
   1  -9  11   43.00    2.09
  -1   9 -11   42.66    1.82
  -1   9 -11   41.18    2.09
   1  -9  11   44.48    2.09
   1  -9  11   43.54    1.82
  -1   9 -12    5.38    0.81
  -1   9 -12    4.51    1.01
   1  -9  12    7.67    1.08
   1  -9  12    5.58    0.74
  -1   9 -13   22.61    1.21
  -1   9 -13   23.55    1.55
   1  -9  13   22.74    1.41
   1  -9  13   23.55    1.21
  -1   9 -13   23.42    1.68
  -1   9 -13   24.76    1.41
   1  -9  13   21.40    1.28
   1  -9  13   22.07    1.55
  -1   9 -14   34.18    1.95
  -1   9 -14   34.65    1.61
   1  -9  14   34.52    1.61
   1  -9  14   35.12    1.82
  -1   9 -14   34.86    2.09
  -1   9 -14   34.12    1.68
   1  -9  14   36.13    1.75
   1  -9  14   34.05    1.95
  -1   9 -15   10.09    1.08
  -1   9 -15    9.82    0.74
   1  -9  15   12.18    1.01
   1  -9  15   10.09    0.81
  -1   9 -15   10.63    1.41
  -1   9 -15   12.58    1.08
   1  -9  15   11.78    1.08
   1  -9  15   10.97    1.28
  -1   9 -16    9.15    1.01
  -1   9 -16    9.02    0.74
   1  -9  16   10.16    1.01
   1  -9  16    9.82    0.74
  -1   9 -16   11.71    1.48
  -1   9 -16   10.43    1.08
   1  -9  16   10.36    1.21
   1  -9  16   10.70    1.08
  -1   9 -17   19.92    1.14
  -1   9 -17   16.22    1.41
   1  -9  17   21.20    1.14
   1  -9  17   19.72    1.35
  -1   9 -17   18.64    1.82
  -1   9 -17   18.10    1.35
   1  -9  17   18.17    1.55
   1  -9  17   19.72    1.48
  -1   9 -18    0.27    0.40
  -1   9 -18   -0.34    0.67
   1  -9  18    0.40    0.61
   1  -9  18    0.13    0.34
  -1   9 -18    0.13    1.14
  -1   9 -18    0.13    0.67
   1  -9  18    1.28    0.94
   1  -9  18    1.14    0.81
   1  -9  19    1.68    1.01
   1  -9  19    1.48    0.81
   1  -9  20    4.64    1.08
   1  -9  20    5.52    1.08
  -1   8  24   -0.13    0.54
  -1   8  24    0.00    0.54
   1  -8 -24    0.61    0.61
   1  -8 -24   -0.27    0.20
  -1   8  24    0.13    1.08
  -1   8  24   -0.20    1.14
   1  -8 -24    1.21    1.08
   1  -8 -24   -1.35    0.94
  -1   8  23    1.08    0.47
  -1   8  23    0.07    0.61
   1  -8 -23    0.00    0.20
   1  -8 -23    0.94    0.61
  -1   8  23   -0.13    1.01
  -1   8  23   -0.20    1.01
   1  -8 -23    1.21    1.01
   1  -8 -23    0.61    1.08
  -1   8  22    0.54    0.74
  -1   8  22    1.08    0.40
   1  -8 -22    1.08    0.54
   1  -8 -22    0.27    0.20
  -1   8  22    2.56    1.01
  -1   8  22    2.15    1.14
   1  -8 -22   -0.47    1.01
   1  -8 -22   -0.07    0.94
  -1   8  21    0.20    0.40
  -1   8  21    0.27    0.61
   1  -8 -21    0.00    0.20
   1  -8 -21    1.21    0.54
  -1   8  21   -0.34    1.08
  -1   8  21    0.47    1.01
   1  -8 -21    1.75    0.87
   1  -8 -21    0.61    0.94
  -1   8  20    5.32    0.54
  -1   8  20    3.36    0.74
  -1   8  20    6.93    1.21
  -1   8  20    5.92    1.35
   1  -8 -20    2.15    1.21
   1  -8 -20    5.38    1.08
   1  -8 -19   12.38    1.68
  -1   8  18    0.87    0.40
  -1   8  18    0.40    0.54
   1  -8 -18   -0.07    0.20
   1  -8 -18    0.67    0.47
  -1   8  18   -0.27    0.87
  -1   8  18   -0.47    0.94
   1  -8 -18    0.81    0.81
   1  -8 -18   -0.13    0.87
  -1   8  17   12.99    0.81
  -1   8  17   14.13    1.41
  -1   8  17   10.90    1.55
   1  -8 -17   12.25    1.28
   1  -8 -17   11.64    1.28
  -1   8  16   13.86    1.01
  -1   8  16   13.86    0.81
  -1   8  16   13.73    1.35
  -1   8  16   11.64    1.28
   1  -8 -16   12.65    1.21
   1  -8 -16   15.54    1.35
  -1   8  15   16.28    1.08
  -1   8  15   15.68    0.87
  -1   8  15   15.48    1.35
  -1   8  15   14.67    1.35
   1  -8 -15   13.32    1.21
   1  -8 -15   14.53    1.35
  -1   8  14   39.90    1.88
  -1   8  14   39.90    1.68
  -1   8  14   37.28    1.95
  -1   8  14   37.75    1.95
   1  -8 -14   36.00    1.88
   1  -8 -14   34.79    1.82
  -1   8  13   12.52    0.87
  -1   8  13   11.91    0.67
  -1   8  13   12.45    1.21
  -1   8  13   13.32    1.21
   1  -8 -13   12.72    1.14
   1  -8 -13   12.18    1.14
  -1   8  12    1.28    0.47
  -1   8  12    1.55    0.34
   1  -8 -12    0.27    0.13
   1  -8 -12    1.35    0.34
  -1   8  12    1.08    0.74
  -1   8  12    0.54    0.74
   1  -8 -12    1.35    0.67
   1  -8 -12    0.81    0.67
  -1   8  11   83.57    3.16
  -1   8  11   85.86    3.36
  -1   8  11   87.27    3.03
  -1   8  11   88.89    2.96
   1  -8 -11   92.45    3.03
   1  -8 -11   89.49    2.96
  -1   8  10   16.08    0.81
  -1   8  10   17.02    0.94
  -1   8  10   17.02    1.21
  -1   8  10   14.20    1.21
   1  -8 -10   17.16    1.21
   1  -8 -10   16.96    1.21
  -1   8   9   39.97    1.61
  -1   8   9   41.18    1.75
  -1   8   9   42.53    1.88
  -1   8   9   44.81    1.82
   1  -8  -9   40.04    1.75
   1  -8  -9   39.23    1.75
  -1   8   8  115.20    3.50
  -1   8   8  111.09    3.30
   1  -8  -8  113.99    3.43
   1  -8  -8  113.25    3.43
  -1   8   7  222.99    8.07
   1  -8  -7  229.86    8.28
  -1   8   7  245.67    6.46
  -1   8   7  235.37    6.12
   1  -8  -7  222.32    5.85
   1  -8  -7  235.51    6.19
  -1   8   6    1.01    0.34
  -1   8   6    0.34    0.34
   1  -8  -6    0.34    0.34
   1  -8  -6    1.14    0.34
  -1   8   6    0.07    0.74
  -1   8   6    1.75    0.67
   1  -8  -6    0.87    0.61
   1  -8  -6    0.74    0.67
  -1   8   5   42.86    1.68
  -1   8   5   43.87    1.82
   1  -8  -5   43.87    1.75
   1  -8  -5   44.28    1.75
  -1   8   5   41.99    1.82
   1  -8  -5   37.95    1.61
  -1   8   4    0.67    0.27
  -1   8   4    0.81    0.40
   1  -8  -4    0.00    0.34
   1  -8  -4    0.20    0.34
  -1   8   3  297.01   10.70
  -1   8   3  283.15   10.16
   1  -8  -3  288.26   10.36
   1  -8  -3  284.83   10.23
  -1   8   2    0.67    0.40
  -1   8   2    0.74    0.27
   1  -8  -2    0.67    0.34
   1  -8  -2    0.47    0.34
  -1   8   2    1.01    0.67
   1  -8  -2    1.41    0.67
  -1   8   1   54.57    2.09
  -1   8   1   53.43    2.22
   1  -8  -1   54.30    2.15
   1  -8  -1   50.40    2.02
  -1   8   0  239.55    8.75
  -1   8   0  229.99    8.28
   1  -8   0  229.45    8.34
   1  -8   0  251.46    9.15
  -1   8   0  235.58    6.19
  -1   8   0  224.47    5.72
   1  -8   0  230.46    5.99
   1  -8   0  234.77    6.06
  -1   8  -1   19.85    1.01
   1  -8   1   19.65    1.08
  -1   8  -1   16.55    1.14
  -1   8  -1   16.96    1.01
   1  -8   1   15.01    1.08
   1  -8   1   15.95    1.01
  -1   8  -2  788.62   18.84
  -1   8  -2  761.70   18.03
   1  -8   2  778.52   18.57
   1  -8   2  766.41   18.24
  -1   8  -3    1.88    0.40
  -1   8  -3    0.67    0.54
   1  -8   3    2.22    0.40
   1  -8   3    1.55    0.54
  -1   8  -3    0.54    0.74
  -1   8  -3    1.88    0.61
   1  -8   3    2.02    0.67
   1  -8   3    1.61    0.54
  -1   8  -4  238.60    8.68
  -1   8  -4  232.75    8.61
   1  -8   4  247.15    9.02
   1  -8   4  232.75    8.55
  -1   8  -4  239.55    6.33
  -1   8  -4  234.70    5.99
   1  -8   4  256.17    6.53
   1  -8   4  251.39    6.53
  -1   8  -5  157.39    5.99
  -1   8  -5  144.33    5.32
   1  -8   5  153.75    5.72
   1  -8   5  147.70    5.58
  -1   8  -5  149.65    4.04
  -1   8  -6   78.93    3.23
  -1   8  -6   79.00    3.10
   1  -8   6   77.18    3.10
   1  -8   6   82.09    3.23
  -1   8  -7   49.12    2.22
  -1   8  -7   51.41    2.09
   1  -8   7   49.32    2.09
   1  -8   7   52.62    2.29
  -1   8  -8  340.54   12.52
  -1   8  -8  307.64   11.17
   1  -8   8  337.85   12.25
   1  -8   8  319.82   11.71
  -1   8  -8  334.22    8.61
  -1   8  -9   34.72    1.82
  -1   8  -9   35.86    1.61
   1  -8   9   40.31    1.75
   1  -8   9   37.21    1.75
  -1   8  -9   38.76    1.61
  -1   8  -9   37.68    1.82
   1  -8   9   37.41    1.55
   1  -8   9   40.98    1.82
  -1   8 -10   30.48    1.41
  -1   8 -10   34.86    1.82
   1  -8  10   32.23    1.61
   1  -8  10   32.63    1.55
   1  -8  10   28.87    1.35
   1  -8  10   32.16    1.68
  -1   8 -11    5.52    0.54
  -1   8 -11    5.25    0.81
   1  -8  11    5.52    0.54
   1  -8  11    4.37    0.67
  -1   8 -11    6.12    1.01
  -1   8 -11    4.31    0.74
   1  -8  11    6.06    0.94
   1  -8  11    4.37    0.67
  -1   8 -12   34.65    1.88
  -1   8 -12   34.32    1.61
   1  -8  12   38.35    1.95
   1  -8  12   36.13    1.61
  -1   8 -12   33.51    1.55
  -1   8 -12   36.07    1.95
   1  -8  12   41.25    1.95
   1  -8  12   36.74    1.61
  -1   8 -13   24.69    1.68
  -1   8 -13   28.87    1.48
   1  -8  13   26.78    1.35
   1  -8  13   27.99    1.61
  -1   8 -14   12.31    0.81
  -1   8 -14   10.83    1.08
   1  -8  14   11.57    0.81
   1  -8  14   12.72    1.08
  -1   8 -14   11.10    1.35
  -1   8 -14   10.90    1.01
   1  -8  14   12.11    1.08
   1  -8  14   14.47    1.28
  -1   8 -15   13.19    1.14
  -1   8 -15   14.47    0.94
   1  -8  15   13.73    0.87
   1  -8  15   14.94    1.14
  -1   8 -15   11.91    1.41
  -1   8 -15   15.01    1.08
   1  -8  15   13.86    1.28
   1  -8  15   16.15    1.21
  -1   8 -16    8.48    0.94
  -1   8 -16    7.54    0.67
   1  -8  16    8.41    0.67
   1  -8  16    8.95    0.94
  -1   8 -16    9.35    1.35
  -1   8 -16    9.35    0.94
   1  -8  16    6.06    0.94
   1  -8  16    7.94    1.14
  -1   8 -17   10.50    0.81
  -1   8 -17    9.02    1.01
   1  -8  17   10.43    0.74
   1  -8  17   11.78    1.08
  -1   8 -17    8.07    1.35
  -1   8 -17   11.04    1.08
   1  -8  17   10.97    1.08
   1  -8  17   12.99    1.28
  -1   8 -18   15.48    1.35
  -1   8 -18   13.79    0.94
   1  -8  18   15.41    0.94
   1  -8  18   14.94    1.21
  -1   8 -18   14.53    1.68
  -1   8 -18   15.68    1.21
   1  -8  18   17.36    1.48
   1  -8  18   13.26    1.28
  -1   8 -19    0.74    0.40
   1  -8  19    1.48    0.61
  -1   8 -19   -0.27    1.08
  -1   8 -19    0.87    0.67
   1  -8  19    0.20    0.81
   1  -8  19    1.01    0.87
  -1   8 -20    3.23    1.14
  -1   8 -20    6.12    0.87
   1  -8  20    7.94    1.21
   1  -8  20    6.12    1.08
  -1   7  24    0.00    0.47
  -1   7  24   -0.34    0.61
   1  -7 -24   -0.40    0.20
   1  -7 -24   -0.27    0.54
  -1   7  24   -0.54    1.01
  -1   7  24    0.27    1.01
   1  -7 -24    1.08    1.01
   1  -7 -24    0.20    1.08
  -1   7  23    3.10    0.74
  -1   7  23    1.82    0.47
  -1   7  23    3.23    1.14
  -1   7  23    1.48    1.01
   1  -7 -23    2.69    1.08
   1  -7 -23    2.83    1.08
  -1   7  22    0.87    0.40
  -1   7  22    1.55    0.67
   1  -7 -22   -0.13    0.20
   1  -7 -22   -0.61    0.47
  -1   7  22    0.81    1.08
  -1   7  22    0.54    0.94
   1  -7 -22   -0.34    1.01
   1  -7 -22    1.35    0.87
  -1   7  21    0.54    0.40
  -1   7  21   -0.61    0.61
   1  -7 -21   -0.07    0.20
   1  -7 -21    0.27    0.47
  -1   7  21   -3.16    1.08
  -1   7  21   -2.76    0.94
   1  -7 -21   -0.40    1.08
   1  -7 -21    0.20    0.81
  -1   7  20    2.29    0.47
  -1   7  20    1.61    0.67
  -1   7  20    0.40    1.21
   1  -7 -20    2.15    1.14
  -1   7  19    4.91    0.87
  -1   7  19    6.59    1.21
  -1   7  19    5.25    1.28
   1  -7 -19    8.68    1.28
   1  -7 -19    8.07    1.14
  -1   7  18    8.48    0.67
  -1   7  18   10.36    1.35
  -1   7  18    7.47    1.14
   1  -7 -18    8.48    1.08
   1  -7 -18    7.40    1.21
  -1   7  17   20.86    1.61
   1  -7 -17   23.42    1.68
   1  -7 -17   19.78    1.41
  -1   7  16    0.40    0.54
  -1   7  16    1.21    0.40
   1  -7 -16   -0.13    0.47
   1  -7 -16    0.27    0.20
  -1   7  16    0.40    0.87
  -1   7  16    0.94    0.81
   1  -7 -16   -1.08    0.81
   1  -7 -16   -0.47    0.74
  -1   7  15    4.10    0.47
  -1   7  15    3.63    0.61
  -1   7  15    2.62    0.87
  -1   7  15    3.03    0.87
   1  -7 -15    3.43    0.94
  -1   7  14   25.17    1.35
  -1   7  14   26.58    1.21
  -1   7  14   25.37    1.55
  -1   7  14   26.51    1.55
   1  -7 -14   26.18    1.48
   1  -7 -14   24.76    1.55
  -1   7  13   10.50    0.67
  -1   7  13   11.71    0.87
  -1   7  13    9.89    1.01
  -1   7  13    9.89    1.08
   1  -7 -13    9.49    1.01
   1  -7 -13    9.22    0.94
  -1   7  12   27.05    1.35
  -1   7  12   28.33    1.21
  -1   7  12   26.65    1.55
  -1   7  12   26.71    1.48
  -1   7  11    2.83    0.40
  -1   7  11    3.16    0.54
  -1   7  11    4.71    0.87
  -1   7  11    2.76    0.81
   1  -7 -11    3.16    0.74
   1  -7 -11    1.68    0.74
  -1   7  10   52.42    2.02
   1  -7 -10   52.55    2.09
  -1   7  10   52.28    2.02
  -1   7  10   52.28    2.02
   1  -7 -10   46.09    1.88
   1  -7 -10   51.61    1.95
  -1   7   9  133.36    3.90
  -1   7   9  129.93    3.70
   1  -7  -9  125.02    3.63
   1  -7  -9  135.85    3.84
  -1   7   8    1.82    0.40
  -1   7   8    1.28    0.34
   1  -7  -8    1.28    0.34
   1  -7  -8    0.34    0.20
  -1   7   8    0.20    0.67
  -1   7   8    1.01    0.67
   1  -7  -8   -0.34    0.67
   1  -7  -8    0.61    0.67
  -1   7   7  119.57    4.37
  -1   7   7  112.24    4.17
   1  -7  -7  114.52    4.24
   1  -7  -7  121.99    4.44
  -1   7   6    6.86    0.54
  -1   7   6    6.46    0.47
   1  -7  -6    5.38    0.47
   1  -7  -6    6.19    0.47
  -1   7   6    6.33    0.94
   1  -7  -6    5.52    0.87
  -1   7   5    0.94    0.27
  -1   7   5    0.47    0.34
   1  -7  -5    0.27    0.27
   1  -7  -5    0.54    0.27
  -1   7   5    1.28    0.61
  -1   7   5   -0.27    0.67
   1  -7  -5    0.54    0.61
   1  -7  -5    1.61    0.61
  -1   7   4   40.10    1.55
  -1   7   4   39.57    1.61
   1  -7  -4   40.51    1.61
   1  -7  -4   37.68    1.55
  -1   7   4   38.89    1.61
  -1   7   4   41.11    1.55
   1  -7  -4   37.61    1.61
   1  -7  -4   38.56    1.55
  -1   7   3  161.09    5.85
  -1   7   3  164.99    5.99
   1  -7  -3  165.86    5.99
   1  -7  -3  166.13    6.06
  -1   7   3  161.29    4.37
  -1   7   3  162.84    4.31
   1  -7  -3  161.69    4.37
   1  -7  -3  163.85    4.37
  -1   7   2   94.41    3.50
  -1   7   2   98.17    3.70
   1  -7  -2   93.87    3.50
   1  -7  -2   95.01    3.57
  -1   7   2  100.93    3.03
  -1   7   2   99.59    2.83
   1  -7  -2   94.27    2.83
   1  -7  -2  100.73    2.89
  -1   7   1   46.03    1.82
  -1   7   1   45.96    1.88
   1  -7  -1   45.76    1.82
   1  -7  -1   45.49    1.82
  -1   7   1   46.23    1.75
  -1   7   1   50.87    1.75
   1  -7  -1   53.29    1.88
   1  -7  -1   48.65    1.75
  -1   7   0  213.84    7.81
  -1   7   0  219.90    7.94
   1  -7   0  219.56    7.94
   1  -7   0  206.64    7.54
  -1   7   0  228.85    5.92
  -1   7   0  220.50    5.58
   1  -7   0  223.67    5.79
   1  -7   0  217.41    5.58
  -1   7  -1   71.73    2.69
  -1   7  -1   76.17    3.03
   1  -7   1   72.54    2.83
   1  -7   1   73.34    2.83
  -1   7  -1   78.86    2.49
  -1   7  -1   74.42    2.22
   1  -7   1   72.74    2.36
   1  -7   1   74.08    2.29
  -1   7  -2    1.75    0.54
  -1   7  -2    1.55    0.34
   1  -7   2    1.95    0.47
   1  -7   2    1.48    0.34
  -1   7  -2    1.55    0.67
  -1   7  -2    2.09    0.61
  -1   7  -3  307.98   11.10
  -1   7  -3  290.55   10.63
   1  -7   3  299.43   10.83
   1  -7   3  284.16   10.30
  -1   7  -3  306.70    7.74
  -1   7  -3  293.71    7.27
   1  -7   3  306.36    7.67
   1  -7   3  317.33    7.87
  -1   7  -4   13.39    1.01
  -1   7  -4   14.20    0.87
   1  -7   4   13.86    1.01
   1  -7   4   13.59    0.87
  -1   7  -5  139.02    5.18
  -1   7  -5  139.08    5.32
   1  -7   5  147.43    5.58
   1  -7   5  133.90    4.98
   1  -7   5  144.87    4.04
   1  -7   5  144.20    3.90
  -1   7  -6  122.26    4.58
  -1   7  -6  130.40    4.98
   1  -7   6  129.87    4.84
   1  -7   6  132.36    5.05
  -1   7  -6  133.30    3.84
  -1   7  -6  132.76    3.63
   1  -7   6  136.26    3.70
   1  -7   6  132.89    3.77
  -1   7  -7    7.67    0.81
  -1   7  -7    6.39    0.54
   1  -7   7    6.33    0.67
   1  -7   7    7.40    0.61
  -1   7  -7    6.26    0.87
  -1   7  -7    8.21    0.74
   1  -7   7    8.55    0.81
   1  -7   7    8.34    0.74
  -1   7  -8   46.70    2.15
  -1   7  -8   43.27    1.82
   1  -7   8   46.43    2.09
   1  -7   8   46.70    1.95
  -1   7  -8   44.41    1.88
  -1   7  -8   45.42    1.68
   1  -7   8   49.32    1.88
   1  -7   8   45.15    1.61
  -1   7  -9   18.71    1.21
  -1   7  -9   18.57    0.94
   1  -7   9   20.93    1.08
   1  -7   9   18.57    1.14
  -1   7  -9   18.37    1.08
  -1   7 -10    5.18    0.67
  -1   7 -10    5.05    0.47
   1  -7  10    4.71    0.67
   1  -7  10    4.51    0.47
  -1   7 -11   34.79    1.55
  -1   7 -11   30.48    1.68
   1  -7  11   35.19    1.75
   1  -7  11   34.52    1.55
  -1   7 -11   31.02    1.48
  -1   7 -11   30.41    1.68
   1  -7  11   33.78    1.68
   1  -7  11   32.37    1.41
  -1   7 -12  193.05    7.40
  -1   7 -12  193.65    7.20
   1  -7  12  177.98    6.59
   1  -7  12  188.54    7.20
  -1   7 -12  183.09    5.32
  -1   7 -12  194.73    5.25
   1  -7  12  184.91    5.05
   1  -7  12  194.87    5.45
  -1   7 -13   11.24    1.01
  -1   7 -13    9.82    0.74
   1  -7  13   12.04    1.01
   1  -7  13   11.64    0.81
  -1   7 -13   11.64    1.28
  -1   7 -13   10.90    0.94
   1  -7  13   11.51    1.14
   1  -7  13   12.18    1.01
  -1   7 -14    5.45    1.08
  -1   7 -14    4.44    0.74
   1  -7  14    4.91    0.74
   1  -7  14    4.98    0.94
  -1   7 -15   15.01    0.94
  -1   7 -15   14.20    1.21
  -1   7 -15   17.63    1.55
  -1   7 -15   17.63    1.21
   1  -7  15   16.96    1.35
   1  -7  15   15.07    1.14
  -1   7 -16    3.50    0.54
  -1   7 -16    4.37    0.74
   1  -7  16    3.63    0.47
   1  -7  16    4.17    0.74
  -1   7 -16    3.43    0.74
  -1   7 -16    3.97    1.14
   1  -7  16    4.04    0.81
   1  -7  16    4.91    0.94
  -1   7 -17    0.81    0.40
  -1   7 -17    0.34    0.61
   1  -7  17    0.47    0.34
   1  -7  17    0.67    0.61
  -1   7 -17    0.67    1.01
  -1   7 -17    0.67    0.61
   1  -7  17    0.54    0.81
   1  -7  17    0.07    0.74
  -1   7 -18    0.13    0.34
  -1   7 -18   -0.13    0.61
   1  -7  18    0.27    0.34
   1  -7  18    0.47    0.61
  -1   7 -18    1.14    1.08
  -1   7 -18    0.94    0.67
   1  -7  18    0.94    0.81
   1  -7  18    0.67    0.81
  -1   7 -19    2.15    0.47
  -1   7 -19    1.61    0.67
   1  -7  19    1.41    0.67
   1  -7  19    0.94    0.40
  -1   7 -19    0.87    1.08
  -1   7 -19    1.95    0.67
   1  -7  19    1.75    0.94
   1  -7  19    0.47    0.87
  -1   7 -20    0.87    1.01
  -1   7 -20    0.81    0.67
   1  -7  20    0.34    0.81
   1  -7  20    1.55    0.87
   1  -7  21    0.34    0.94
   1  -7  21    0.47    0.81
  -1   6  24    0.34    0.67
  -1   6  24   -0.87    0.40
   1  -6 -24    0.13    0.54
   1  -6 -24    0.07    0.20
  -1   6  24    0.61    1.08
  -1   6  24    0.67    1.01
   1  -6 -24   -0.94    0.94
   1  -6 -24   -0.27    1.01
  -1   6  23   -1.01    0.67
  -1   6  23   -0.27    0.40
   1  -6 -23   -0.20    0.47
   1  -6 -23   -0.20    0.20
  -1   6  23   -0.40    0.94
  -1   6  23   -0.47    1.01
   1  -6 -23    1.41    0.94
   1  -6 -23    0.67    0.94
  -1   6  22    5.79    0.61
  -1   6  22    8.21    0.94
  -1   6  22    7.60    1.55
  -1   6  22    5.25    1.41
   1  -6 -22    5.05    1.28
  -1   6  21    1.08    0.40
  -1   6  21    0.87    0.61
   1  -6 -21    0.54    0.54
   1  -6 -21   -0.07    0.20
  -1   6  21    1.01    1.14
   1  -6 -21    1.28    1.01
  -1   6  20   12.99    0.81
  -1   6  20   14.06    1.14
  -1   6  20   12.99    1.55
  -1   6  20   15.07    1.48
   1  -6 -20   11.30    1.28
   1  -6 -20   13.12    1.48
  -1   6  19   -0.13    0.40
  -1   6  19    0.34    0.61
   1  -6 -19    0.27    0.47
   1  -6 -19    0.07    0.20
  -1   6  19    0.07    1.01
  -1   6  19   -0.67    0.81
   1  -6 -19    0.47    0.81
   1  -6 -19   -1.68    0.81
  -1   6  18   19.04    1.28
  -1   6  18   19.24    1.48
  -1   6  18   18.57    1.61
   1  -6 -18   14.74    1.48
   1  -6 -18   17.63    1.35
  -1   6  17   13.32    0.81
  -1   6  17   11.57    0.94
  -1   6  17   13.19    1.28
  -1   6  17    9.89    1.28
   1  -6 -17   12.65    1.21
   1  -6 -17   11.98    1.35
  -1   6  16    5.58    0.67
  -1   6  16    5.65    0.54
  -1   6  16    7.67    1.14
  -1   6  16    6.73    1.08
   1  -6 -16    5.65    0.94
   1  -6 -16    6.53    1.08
  -1   6  15   24.63    1.35
  -1   6  15   25.37    1.14
  -1   6  15   23.28    1.55
  -1   6  15   21.60    1.41
   1  -6 -15   24.63    1.48
   1  -6 -15   29.14    1.68
  -1   6  14    3.84    0.61
  -1   6  14    3.77    0.40
  -1   6  14    4.17    0.87
  -1   6  14    4.31    0.87
   1  -6 -14    3.36    0.94
   1  -6 -14    3.97    0.87
  -1   6  13   94.34    3.57
  -1   6  13   96.02    3.77
  -1   6  13   93.19    3.10
  -1   6  13   99.12    3.16
   1  -6 -13   95.62    3.10
   1  -6 -13   98.44    3.10
  -1   6  12    5.85    0.47
  -1   6  12    6.06    0.61
  -1   6  12    7.40    0.94
  -1   6  12    7.94    0.94
   1  -6 -12    6.53    0.87
   1  -6 -12    7.67    0.94
  -1   6  11   29.07    1.21
  -1   6  11   28.40    1.41
  -1   6  11   27.66    1.48
  -1   6  11   30.55    1.55
   1  -6 -10   77.31    3.03
  -1   6  10   76.64    2.56
  -1   6  10   77.78    2.56
   1  -6 -10   73.28    2.42
   1  -6 -10   76.17    2.49
  -1   6   9  203.95    7.33
  -1   6   9  208.59    7.60
  -1   6   8    1.68    0.40
  -1   6   8    1.55    0.34
  -1   6   8    0.54    0.61
   1  -6  -8    1.75    0.67
  -1   6   7    7.20    0.47
  -1   6   7    5.99    0.47
   1  -6  -7    5.58    0.40
   1  -6  -7    6.39    0.47
  -1   6   7    5.72    0.81
  -1   6   7    5.99    0.81
   1  -6  -7    6.53    0.81
   1  -6  -7    6.06    0.81
  -1   6   6  134.71    4.91
  -1   6   6  128.39    4.64
   1  -6  -6  130.67    4.78
   1  -6  -6  132.15    4.78
  -1   6   6  129.33    3.63
  -1   6   6  135.79    3.70
   1  -6  -6  132.22    3.70
   1  -6  -6  135.11    3.70
  -1   6   5    5.65    0.40
  -1   6   5    4.98    0.40
   1  -6  -5    4.58    0.40
   1  -6  -5    4.37    0.40
  -1   6   5    4.64    0.81
  -1   6   5    5.18    0.74
   1  -6  -5    3.50    0.67
   1  -6  -5    3.43    0.67
  -1   6   4    0.54    0.34
  -1   6   4    1.08    0.27
   1  -6  -4    1.08    0.27
   1  -6  -4    1.08    0.27
  -1   6   4    1.01    0.61
  -1   6   4    1.55    0.67
   1  -6  -4    0.67    0.61
   1  -6  -4    1.14    0.54
  -1   6   3   50.13    1.95
  -1   6   3   48.72    1.88
   1  -6  -3   50.26    1.95
   1  -6  -3   49.12    1.88
  -1   6   3   47.24    1.75
  -1   6   3   47.51    1.61
   1  -6  -3   49.12    1.75
   1  -6  -3   44.34    1.61
  -1   6   2  110.02    4.10
  -1   6   2  105.31    3.84
   1  -6  -2  111.03    4.10
   1  -6  -2  102.95    3.77
  -1   6   2  104.43    3.03
  -1   6   2  110.15    3.03
   1  -6  -2  104.23    2.96
   1  -6  -2  103.89    2.89
  -1   6   1   50.67    1.95
  -1   6   1   48.04    1.95
   1  -6  -1   47.30    1.88
   1  -6  -1   52.22    2.02
  -1   6   1   43.67    1.48
  -1   6   1   45.76    1.68
   1  -6  -1   46.03    1.61
   1  -6  -1   44.41    1.61
  -1   6   0  187.26    6.86
  -1   6   0  183.49    6.59
   1  -6   0  189.48    6.86
   1  -6   0  189.15    6.86
  -1   6   0  192.51    4.91
  -1   6   0  190.29    4.91
   1  -6   0  190.22    4.84
   1  -6   0  189.01    4.91
  -1   6  -1   47.10    1.82
  -1   6  -1   46.77    1.95
   1  -6   1   46.16    1.82
   1  -6   1   47.17    1.88
  -1   6  -1   47.84    1.61
  -1   6  -1   47.44    1.68
   1  -6   1   47.10    1.68
   1  -6   1   45.96    1.55
  -1   6  -2  213.24    7.74
  -1   6  -2  222.19    8.14
   1  -6   2  221.65    8.01
   1  -6   2  217.68    7.94
  -1   6  -2  220.84    5.52
  -1   6  -2  220.17    5.65
   1  -6   2  224.47    5.72
   1  -6   2  220.30    5.52
  -1   6  -3   19.98    1.08
  -1   6  -3   22.21    1.01
   1  -6   3   21.73    1.01
   1  -6   3   20.86    1.08
  -1   6  -3   18.50    0.94
  -1   6  -3   18.50    1.08
   1  -6   3   19.65    1.08
   1  -6   3   21.60    1.01
  -1   6  -4  113.99    4.37
  -1   6  -4  114.19    4.24
   1  -6   4  114.59    4.31
   1  -6   4  115.13    4.37
  -1   6  -4  115.94    3.16
  -1   6  -4  114.93    3.30
   1  -6   4  115.47    3.16
   1  -6   4  114.93    3.23
  -1   6  -5    7.20    0.61
   1  -6   5    7.13    0.74
  -1   6  -5    8.95    0.87
  -1   6  -5    7.47    0.67
   1  -6   5   10.23    0.74
   1  -6   5    9.15    0.87
  -1   6  -6   50.94    2.22
   1  -6   6   51.21    2.09
  -1   6  -6   44.41    1.55
  -1   6  -6   47.71    1.82
   1  -6   6   49.39    1.68
   1  -6   6   46.50    1.75
  -1   6  -7    1.41    0.34
  -1   6  -7    2.22    0.54
   1  -6   7    2.36    0.40
   1  -6   7    1.95    0.47
  -1   6  -7    1.61    0.67
  -1   6  -7    1.82    0.47
   1  -6   7    3.16    0.54
   1  -6   7    1.14    0.61
  -1   6  -8    3.97    0.47
  -1   6  -8    4.98    0.67
   1  -6   8    5.65    0.67
   1  -6   8    4.44    0.47
  -1   6  -8    4.37    0.54
  -1   6  -8    4.17    0.74
   1  -6   8    4.78    0.61
   1  -6   8    5.45    0.67
  -1   6  -9   70.25    2.96
  -1   6  -9   70.99    2.83
   1  -6   9   71.19    2.96
   1  -6   9   71.73    2.83
  -1   6  -9   72.87    2.29
  -1   6  -9   77.92    2.62
   1  -6   9   75.09    2.29
   1  -6   9   72.07    2.42
  -1   6 -10    0.67    0.47
  -1   6 -10   -0.07    0.27
   1  -6  10   -0.27    0.27
   1  -6  10   -0.47    0.47
  -1   6 -10   -0.74    0.67
  -1   6 -10    0.47    0.47
   1  -6  10    0.20    0.47
  -1   6 -11   85.86    3.57
  -1   6 -11   86.87    3.36
   1  -6  11   88.15    3.43
   1  -6  11   90.23    3.70
  -1   6 -12   12.18    0.81
  -1   6 -12   13.73    1.08
   1  -6  12   11.57    0.94
   1  -6  12   12.52    0.81
  -1   6 -12   12.92    1.21
   1  -6  12   12.92    0.94
  -1   6 -13    0.34    0.34
  -1   6 -13   -0.13    0.54
   1  -6  13    1.14    0.54
   1  -6  13    0.27    0.34
  -1   6 -13    1.08    0.81
  -1   6 -13    0.34    0.54
   1  -6  13   -0.40    0.74
   1  -6  13    0.20    0.61
  -1   6 -14   28.46    1.61
  -1   6 -14   32.57    1.55
   1  -6  14   32.63    1.48
   1  -6  14   30.68    1.68
  -1   6 -14   29.07    1.41
  -1   6 -14   30.15    1.82
   1  -6  14   30.89    1.68
   1  -6  14   30.89    1.48
  -1   6 -15    0.13    0.94
   1  -6  15    0.81    0.81
   1  -6  15    1.68    0.67
  -1   6 -16    3.50    0.47
  -1   6 -16    3.36    0.67
   1  -6  16    3.57    0.47
   1  -6  16    3.50    0.74
  -1   6 -16    1.48    1.01
  -1   6 -16    3.63    0.81
   1  -6  16    2.56    0.87
   1  -6  16    2.36    0.74
  -1   6 -17   12.99    1.08
  -1   6 -17    9.69    0.74
   1  -6  17   12.65    1.08
   1  -6  17   11.71    0.74
  -1   6 -17   10.36    1.35
  -1   6 -17   10.77    1.08
   1  -6  17   11.04    1.08
   1  -6  17   13.73    1.35
  -1   6 -18    2.02    0.47
  -1   6 -18    1.41    0.67
   1  -6  18    1.68    0.67
   1  -6  18    1.75    0.40
  -1   6 -18    0.94    1.08
   1  -6  18    1.75    0.81
   1  -6  18    1.55    0.94
  -1   6 -19   12.11    0.87
  -1   6 -19   12.18    1.08
   1  -6  19   11.57    1.08
   1  -6  19   12.58    0.81
  -1   6 -19   10.36    1.48
  -1   6 -19   11.51    1.08
   1  -6  19   11.10    1.21
   1  -6  19   13.52    1.35
   1  -6  20    5.52    0.54
   1  -6  20    5.52    0.81
  -1   6 -20    4.37    1.48
  -1   6 -20    6.80    0.87
   1  -6  20    5.38    1.21
   1  -6  20    4.91    1.08
  -1   6 -21   -0.61    0.61
  -1   6 -21    0.13    0.94
   1  -6  21   -0.47    0.81
   1  -6  21    1.01    0.87
   1  -6  22    0.94    0.81
   1  -6  22    1.21    1.01
  -1   5  25    2.09    1.28
  -1   5  25    5.11    1.35
   1  -5 -25    3.77    1.21
   1  -5 -25    2.42    1.28
  -1   5  24    1.01    0.74
  -1   5  24    1.08    0.47
   1  -5 -24    0.00    0.20
   1  -5 -24    0.00    0.54
  -1   5  24    0.87    1.08
  -1   5  24    1.68    1.08
   1  -5 -24    1.14    1.08
   1  -5 -24    0.61    1.01
  -1   5  23    1.21    0.40
  -1   5  23    2.83    0.74
   1  -5 -23    0.54    0.47
   1  -5 -23   -0.07    0.27
   1  -5 -23    0.27    1.01
   1  -5 -23    0.13    1.08
  -1   5  22   -0.07    0.61
  -1   5  22   -0.20    0.40
   1  -5 -22    0.40    0.47
   1  -5 -22    0.07    0.20
   1  -5 -22   -0.81    0.94
  -1   5  21    1.68    0.47
  -1   5  21    1.35    0.61
   1  -5 -21    0.00    3.30
   1  -5 -21    1.88    0.54
  -1   5  21    0.81    1.14
  -1   5  21    0.00    0.94
   1  -5 -21    0.81    0.94
   1  -5 -21    2.15    1.08
  -1   5  20   -0.34    0.61
  -1   5  20    0.13    0.40
   1  -5 -20    0.54    0.47
   1  -5 -20    0.07    0.20
  -1   5  20    0.40    0.87
  -1   5  20   -1.08    1.01
   1  -5 -20    1.08    0.87
   1  -5 -20    0.07    0.87
  -1   5  19    1.41    0.61
   1  -5 -19   -0.13    0.20
   1  -5 -19    1.08    0.47
  -1   5  19    1.55    0.87
  -1   5  19   -0.07    1.01
   1  -5 -19    0.87    0.87
   1  -5 -19    1.95    0.87
  -1   5  18    1.55    0.61
  -1   5  18    2.29    0.40
  -1   5  18    2.36    0.87
  -1   5  18    2.42    1.01
   1  -5 -18    2.29    0.87
   1  -5 -18    2.49    0.87
  -1   5  17    0.67    0.40
  -1   5  17    1.55    0.54
   1  -5 -17    0.27    0.20
   1  -5 -17    1.14    0.47
  -1   5  17   -0.54    0.94
  -1   5  17    1.35    0.81
   1  -5 -17    1.21    0.81
   1  -5 -17    0.34    0.81
  -1   5  16   19.45    1.21
  -1   5  16   20.12    1.01
  -1   5  16   17.09    1.41
   1  -5 -16   18.44    1.41
   1  -5 -16   18.37    1.35
  -1   5  15    0.34    0.34
  -1   5  15   -0.27    0.47
   1  -5 -15    0.00    0.20
   1  -5 -15    0.34    0.40
  -1   5  15    0.34    0.74
  -1   5  15   -1.21    0.81
   1  -5 -15   -0.61    0.67
   1  -5 -15    0.47    0.81
  -1   5  14    9.08    0.61
  -1   5  14    8.34    0.74
  -1   5  14    8.34    1.01
  -1   5  14    8.61    0.94
   1  -5 -14    7.74    1.01
   1  -5 -14    9.96    1.08
  -1   5  13   33.58    1.61
  -1   5  13   31.83    1.35
  -1   5  13   32.43    1.68
  -1   5  13   30.82    1.55
   1  -5 -13   31.09    1.55
   1  -5 -13   31.76    1.61
  -1   5  12   36.74    1.55
  -1   5  12   34.18    1.55
  -1   5  12   35.19    1.61
  -1   5  12   34.18    1.55
   1  -5 -12   31.96    1.55
   1  -5 -12   34.12    1.55
  -1   5  11  271.64    7.20
   1  -5 -11  255.16    6.59
  -1   5  10   49.39    1.95
  -1   5  10   52.08    2.15
  -1   5  10   43.40    1.82
   1  -5 -10   45.22    1.82
  -1   5   9    6.39    0.54
  -1   5   9    6.46    0.47
  -1   5   9    8.48    0.87
  -1   5   9    7.13    0.87
   1  -5  -9    6.33    0.81
   1  -5  -9    7.00    0.81
  -1   5   8   49.25    1.88
  -1   5   8   48.18    1.95
   1  -5  -8   53.90    2.09
   1  -5  -8   51.95    2.02
  -1   5   8   47.57    1.75
  -1   5   8   50.40    1.82
   1  -5  -8   47.10    1.68
   1  -5  -8   48.25    1.75
  -1   5   7  118.56    4.31
  -1   5   7  117.01    4.31
   1  -5  -7  116.95    4.24
   1  -5  -7  121.66    4.44
  -1   5   7  117.42    3.30
  -1   5   7  124.15    3.43
   1  -5  -7  113.45    3.16
   1  -5  -7  120.78    3.36
  -1   5   6   30.48    1.21
  -1   5   6   29.88    1.21
   1  -5  -6   29.81    1.21
   1  -5  -6   30.48    1.21
  -1   5   6   24.83    1.21
  -1   5   6   26.78    1.21
   1  -5  -6   26.71    1.21
   1  -5  -6   25.50    1.21
  -1   5   5  155.03    5.58
  -1   5   5  162.23    5.85
   1  -5  -5  159.20    5.72
   1  -5  -5  154.29    5.58
  -1   5   5  159.20    4.17
  -1   5   5  160.01    4.24
   1  -5  -5  162.23    4.24
   1  -5  -5  162.10    4.24
  -1   5   4    1.14    0.34
  -1   5   4    1.75    0.27
   1  -5  -4    1.28    0.27
   1  -5  -4    1.95    0.27
  -1   5   4    1.68    0.61
  -1   5   4    1.75    0.67
   1  -5  -4    1.14    0.61
   1  -5  -4    1.35    0.61
  -1   5   3   90.03    3.30
  -1   5   3   90.84    3.36
   1  -5  -3   90.10    3.30
   1  -5  -3   87.74    3.23
  -1   5   3   86.67    2.49
  -1   5   3   87.47    2.56
   1  -5  -3   83.91    2.49
   1  -5  -3   83.50    2.42
  -1   5   2  615.75   21.87
  -1   5   2  633.25   22.47
   1  -5  -2  629.01   22.34
   1  -5  -2  624.77   22.21
  -1   5   2  642.20   15.21
  -1   5   2  635.47   15.01
   1  -5  -2  609.29   14.47
   1  -5  -2  643.68   15.21
  -1   5   1  406.69   14.47
  -1   5   1  403.66   14.40
   1  -5  -1  415.37   14.80
   1  -5  -1  405.07   14.47
  -1   5   1  400.90    9.62
  -1   5   1  409.04    9.89
   1  -5  -1  402.11    9.69
   1  -5  -1  392.29    9.49
  -1   5   0  466.24   16.62
  -1   5   0  469.47   16.75
   1  -5   0  486.83   17.36
   1  -5   0  482.59   17.23
  -1   5   0  469.27   11.17
  -1   5   0  468.66   11.24
   1  -5   0  471.29   11.24
   1  -5   0  462.40   11.10
  -1   5  -1  940.69   33.37
  -1   5  -1  919.15   32.70
   1  -5   1  932.61   33.11
   1  -5   1  928.57   32.97
  -1   5  -1  945.40   22.21
  -1   5  -1  921.17   21.53
   1  -5   1  926.56   21.67
   1  -5   1  906.37   21.26
  -1   5  -2  348.28   12.45
  -1   5  -2  355.01   12.78
   1  -5   2  341.62   12.25
   1  -5   2  344.99   12.38
  -1   5  -2  349.49    8.41
  -1   5  -2  347.54    8.48
   1  -5   2  340.88    8.28
   1  -5   2  349.56    8.41
  -1   5  -3  367.19   13.12
  -1   5  -3  371.83   13.39
   1  -5   3  371.97   13.32
   1  -5   3  380.24   13.66
  -1   5  -3  368.74    8.88
  -1   5  -3  376.07    9.15
   1  -5   3  379.50    9.15
   1  -5   3  379.71    9.22
  -1   5  -4   19.98    1.01
  -1   5  -4   20.19    0.94
   1  -5   4   20.86    0.94
   1  -5   4   20.25    1.08
  -1   5  -4   19.11    1.01
  -1   5  -4   20.25    0.94
   1  -5   4   19.72    1.01
   1  -5   4   19.85    0.94
  -1   5  -5   49.86    2.09
  -1   5  -5   50.33    2.02
   1  -5   5   50.33    2.02
   1  -5   5   51.07    2.15
  -1   5  -5   48.78    1.61
  -1   5  -5   48.58    1.75
   1  -5   5   52.01    1.75
   1  -5   5   51.41    1.68
  -1   5  -6  137.13    5.18
  -1   5  -6  134.91    4.98
   1  -5   6  141.44    5.32
   1  -5   6  132.76    4.91
  -1   5  -6  138.01    3.63
  -1   5  -6  143.93    3.97
   1  -5   6  145.81    3.90
   1  -5   6  141.98    3.77
  -1   5  -7  210.95    7.81
   1  -5   7  225.15    8.21
  -1   5  -7  217.81    5.65
  -1   5  -7  224.34    5.65
   1  -5   7  227.77    5.72
   1  -5   7  216.06    5.58
  -1   5  -8  143.19    5.32
  -1   5  -8  148.98    5.65
   1  -5   8  148.10    5.52
   1  -5   8  147.02    5.58
  -1   5  -8  149.04    3.97
  -1   5  -8  149.72    4.17
  -1   5  -9    3.50    0.40
  -1   5  -9    2.89    0.54
   1  -5   9    4.31    0.47
   1  -5   9    2.89    0.54
  -1   5  -9    2.42    0.67
  -1   5  -9    2.96    0.54
   1  -5   9    2.42    0.61
   1  -5   9    3.23    0.54
  -1   5 -10   32.84    1.61
  -1   5 -10   35.86    1.55
   1  -5  10   34.18    1.68
   1  -5  10   35.39    1.55
  -1   5 -10   32.90    1.55
  -1   5 -10   36.20    1.41
   1  -5  10   37.21    1.61
   1  -5  10   34.59    1.35
  -1   5 -11   39.36    1.88
  -1   5 -11   40.44    1.75
   1  -5  11   40.84    1.75
  -1   5 -11   41.18    1.82
  -1   5 -11   41.31    1.61
   1  -5  11   37.48    1.68
   1  -5  11   42.12    1.61
  -1   5 -12    0.47    0.34
  -1   5 -12   -0.13    0.54
   1  -5  12    0.13    0.27
   1  -5  12    0.81    0.47
  -1   5 -13   27.45    1.55
  -1   5 -13   29.88    1.41
   1  -5  13   32.50    1.61
   1  -5  13   29.47    1.35
  -1   5 -13   29.81    1.68
   1  -5  13   27.79    1.41
   1  -5  13   27.92    1.61
  -1   5 -14    1.61    0.61
  -1   5 -14    1.68    0.40
   1  -5  14    1.75    0.34
   1  -5  14    1.55    0.54
  -1   5 -14    2.02    0.87
  -1   5 -14    1.35    0.61
   1  -5  14    1.75    0.61
   1  -5  14    1.14    0.74
  -1   5 -15   18.44    1.28
  -1   5 -15   17.23    1.01
   1  -5  15   18.44    1.01
   1  -5  15   19.31    1.21
  -1   5 -15   16.75    1.48
  -1   5 -15   19.58    1.21
   1  -5  15   18.24    1.21
   1  -5  15   18.77    1.41
  -1   5 -16    6.06    0.81
   1  -5  16    6.19    0.54
  -1   5 -16    8.14    1.28
  -1   5 -16    7.13    0.94
   1  -5  16    6.19    1.08
   1  -5  16    5.92    0.87
  -1   5 -17    9.55    0.74
  -1   5 -17    9.55    0.94
   1  -5  17    9.82    0.94
   1  -5  17    8.55    0.61
  -1   5 -17   10.43    1.01
  -1   5 -17    8.81    1.35
   1  -5  17    9.29    1.08
   1  -5  17    8.68    1.21
  -1   5 -18    6.33    0.81
  -1   5 -18    7.47    0.67
   1  -5  18    5.99    0.54
   1  -5  18    7.27    0.81
  -1   5 -18    9.76    1.01
  -1   5 -18    8.34    1.28
   1  -5  18    6.12    1.14
   1  -5  18    6.73    1.01
  -1   5 -19    2.89    0.61
  -1   5 -19    1.68    0.47
   1  -5  19    2.36    0.61
   1  -5  19    2.83    0.40
  -1   5 -19    3.23    0.81
  -1   5 -19    1.82    1.08
   1  -5  19    1.55    1.01
   1  -5  19    3.97    0.94
  -1   5 -20    1.01    0.61
  -1   5 -20    0.47    0.40
   1  -5  20    0.81    0.40
  -1   5 -20    0.13    0.67
  -1   5 -20    0.34    1.01
   1  -5  20    0.40    0.87
   1  -5  20    2.22    0.94
  -1   5 -21   -0.07    0.40
  -1   5 -21    0.54    0.61
   1  -5  21    0.00    0.34
   1  -5  21   -0.74    0.47
  -1   5 -21   -0.13    1.08
  -1   5 -21   -0.07    0.67
   1  -5  21    0.40    0.94
   1  -5  21   -0.07    0.87
  -1   5 -22    0.13    0.74
  -1   5 -22    0.27    1.01
   1  -5  22    0.07    0.87
   1  -5  22   -0.81    0.87
  -1   4  25   -0.74    1.14
  -1   4  25    1.14    1.14
   1  -4 -25    1.75    1.14
   1  -4 -25    1.01    1.14
  -1   4  24    1.88    0.47
  -1   4  24    1.68    0.74
   1  -4 -24   -0.27    0.20
   1  -4 -24    0.81    0.54
  -1   4  24    1.28    1.08
  -1   4  24    0.74    1.08
   1  -4 -24    0.61    1.08
   1  -4 -24    0.94    1.08
  -1   4  23    0.61    0.40
  -1   4  23    0.34    0.61
   1  -4 -23   -0.34    0.47
   1  -4 -23    0.27    0.20
  -1   4  22    5.32    0.54
  -1   4  22    4.91    0.81
  -1   4  22    3.97    1.14
  -1   4  22    5.11    1.28
   1  -4 -22    4.44    1.08
   1  -4 -22    3.10    1.14
  -1   4  21    1.01    0.61
  -1   4  21    0.00    0.40
   1  -4 -21    0.07    0.47
   1  -4 -21    0.20    0.20
  -1   4  21   -0.07    1.08
  -1   4  21   -0.40    0.87
   1  -4 -21   -0.54    0.87
   1  -4 -21    0.87    0.94
  -1   4  20    0.87    0.40
   1  -4 -20    0.20    0.47
  -1   4  20    0.40    1.01
  -1   4  20    1.08    0.87
   1  -4 -20    0.40    0.94
   1  -4 -20   -0.13    0.87
  -1   4  19    3.36    0.47
  -1   4  19    3.23    0.67
  -1   4  19    2.83    1.08
  -1   4  19    3.50    0.94
   1  -4 -19    2.76    0.94
   1  -4 -19    2.76    0.94
  -1   4  18    7.87    0.61
  -1   4  18    7.67    0.81
  -1   4  18    7.74    1.21
  -1   4  18    6.39    1.01
   1  -4 -18    7.74    1.08
   1  -4 -18    7.60    1.14
  -1   4  17   23.28    1.14
  -1   4  17   20.52    1.28
  -1   4  17   20.66    1.41
  -1   4  17   21.73    1.61
   1  -4 -17   21.40    1.41
   1  -4 -17   19.65    1.48
  -1   4  16    4.91    0.67
  -1   4  16    3.84    0.47
   1  -4 -16    4.10    0.61
  -1   4  16    4.71    1.08
  -1   4  16    5.11    0.94
   1  -4 -16    6.26    0.94
   1  -4 -16    4.37    0.87
  -1   4  15    5.65    0.47
  -1   4  15    4.98    0.61
  -1   4  15    6.46    1.01
  -1   4  15    3.84    0.87
   1  -4 -15    6.59    0.94
   1  -4 -15    4.98    0.87
  -1   4  14    0.54    0.34
  -1   4  14    0.13    0.47
   1  -4 -14    0.07    0.13
   1  -4 -14    0.67    0.40
  -1   4  14    1.48    0.81
  -1   4  14    0.81    0.67
   1  -4 -14    0.47    0.67
   1  -4 -14    0.47    0.74
  -1   4  13   20.12    0.94
  -1   4  13   19.04    1.08
  -1   4  13   22.61    1.35
  -1   4  13   18.57    1.14
   1  -4 -13   19.18    1.28
  -1   4  12    2.09    0.34
  -1   4  12    2.09    0.47
   1  -4 -12    0.00    0.13
   1  -4 -12    1.08    0.40
  -1   4  11   45.08    1.75
  -1   4  11   46.50    1.88
   1  -4 -11   47.51    1.82
   1  -4 -11   45.82    1.82
  -1   4  10  157.92    5.85
  -1   4  10  160.82    5.85
  -1   4  10  157.25    4.24
  -1   4  10  154.29    4.24
   1  -4 -10  158.19    4.24
   1  -4 -10  156.51    4.24
  -1   4   9   74.02    2.76
  -1   4   9   75.56    2.89
   1  -4  -9   77.99    2.96
   1  -4  -9   76.44    2.89
  -1   4   9   75.56    2.36
  -1   4   9   73.75    2.29
   1  -4  -9   77.11    2.36
   1  -4  -9   74.42    2.29
  -1   4   8    1.82    0.34
  -1   4   8    2.42    0.40
   1  -4  -8    2.02    0.34
   1  -4  -8    1.75    0.34
  -1   4   8    3.43    0.67
  -1   4   8    3.36    0.67
   1  -4  -8    3.30    0.67
   1  -4  -8    3.16    0.67
   1  -4  -7    6.59    0.47
   1  -4  -7    6.26    0.47
  -1   4   7    8.01    0.81
  -1   4   7    7.67    0.74
   1  -4  -7    7.07    0.74
   1  -4  -7    6.86    0.74
  -1   4   6   20.12    0.87
  -1   4   6   19.38    0.87
   1  -4  -6   20.39    0.87
   1  -4  -6   20.59    0.87
  -1   4   6   19.04    0.94
  -1   4   6   18.03    1.01
   1  -4  -6   17.56    0.94
   1  -4  -6   18.17    0.94
   1  -4  -5   14.87    0.67
   1  -4  -5   13.86    0.61
  -1   4   5   15.95    0.87
  -1   4   5   14.67    0.94
   1  -4  -5   12.65    0.81
   1  -4  -5   13.93    0.87
  -1   4   4  191.84    6.86
  -1   4   4  195.94    7.00
   1  -4  -4  193.79    6.93
   1  -4  -4  195.34    7.00
  -1   4   4  206.44    5.11
  -1   4   4  204.15    5.11
   1  -4  -4  207.31    5.18
   1  -4  -4  200.11    5.05
  -1   4   3 1171.48   41.45
  -1   4   3 1198.40   42.39
   1  -4  -3 1209.84   42.80
   1  -4  -3 1191.67   42.19
  -1   4   3 1215.89   28.26
  -1   4   3 1191.00   27.72
   1  -4  -3 1214.55   28.26
   1  -4  -3 1206.47   28.13
  -1   4   2 4058.14  143.39
  -1   4   2 4099.86  144.80
   1  -4  -2 4159.07  146.96
   1  -4  -2 4274.81  151.06
  -1   4   2 4105.24   94.54
  -1   4   2 4275.48   98.51
   1  -4  -2 4209.54   96.96
   1  -4  -2 4035.94   92.99
  -1   4   1   24.16    1.01
  -1   4   1   25.84    1.01
   1  -4  -1   24.76    1.01
   1  -4  -1   24.63    1.01
  -1   4   1   23.48    0.94
  -1   4   1   20.93    1.01
   1  -4  -1   23.42    0.94
   1  -4  -1   21.20    1.01
  -1   4   0   14.74    0.67
  -1   4   0   15.34    0.74
   1  -4   0   13.52    0.67
   1  -4   0   13.19    0.61
  -1   4   0   12.85    0.74
  -1   4   0   13.86    0.81
   1  -4   0   12.58    0.81
   1  -4   0   12.18    0.74
  -1   4  -1   75.63    2.83
  -1   4  -1   70.32    2.69
   1  -4   1   72.67    2.69
   1  -4   1   72.94    2.76
  -1   4  -1   64.87    1.95
  -1   4  -1   66.41    1.88
   1  -4   1   66.82    1.88
   1  -4   1   62.11    1.88
  -1   4  -2 1389.50   49.19
  -1   4  -2 1382.77   49.05
   1  -4   2 1393.54   49.39
   1  -4   2 1367.29   48.45
  -1   4  -2 1382.77   32.10
  -1   4  -2 1407.67   32.70
   1  -4   2 1403.63   32.57
   1  -4   2 1372.00   31.89
  -1   4  -3  531.44   18.98
  -1   4  -3  512.73   18.24
   1  -4   3  517.18   18.44
   1  -4   3  509.77   18.24
  -1   4  -3  521.15   12.31
  -1   4  -3  526.93   12.52
   1  -4   3  514.22   12.25
   1  -4   3  530.63   12.52
  -1   4  -4   82.56    3.10
  -1   4  -4   90.10    3.43
  -1   4  -4   91.31    2.49
  -1   4  -4   95.48    2.69
   1  -4   4   96.22    2.69
   1  -4   4   94.61    2.56
  -1   4  -5    1.95    0.34
  -1   4  -5    2.42    0.47
   1  -4   5    2.09    0.34
   1  -4   5    3.16    0.54
  -1   4  -5    2.22    0.47
  -1   4  -5    1.41    0.61
   1  -4   5    2.42    0.47
   1  -4   5    2.09    0.54
  -1   4  -6    8.34    0.54
  -1   4  -6    9.55    0.74
   1  -4   6    9.96    0.61
   1  -4   6    9.76    0.74
  -1   4  -6    8.14    0.81
  -1   4  -6    9.82    0.67
   1  -4   6   11.10    0.67
   1  -4   6    9.49    0.74
  -1   4  -7  375.06   13.46
  -1   4  -7  379.10   13.73
   1  -4   7  388.25   13.93
   1  -4   7  384.15   13.86
  -1   4  -7  383.41    9.42
  -1   4  -7  368.47    8.95
   1  -4   7  379.10    9.29
   1  -4   7  379.64    9.15
  -1   4  -8    0.61    0.47
   1  -4   8    0.27    0.27
  -1   4  -8    0.13    0.54
  -1   4  -8    0.47    0.47
   1  -4   8   -0.47    0.54
   1  -4   8    0.07    0.47
  -1   4  -9  259.93    9.42
  -1   4  -9  266.80    9.82
   1  -4   9  258.18    9.35
   1  -4   9  267.00    9.82
  -1   4  -9  246.48    6.46
   1  -4   9  259.73    6.53
   1  -4   9  256.43    6.53
  -1   4 -10    1.41    0.47
  -1   4 -10    1.08    0.34
   1  -4  10    1.55    0.47
   1  -4  10    1.75    0.34
  -1   4 -10    1.88    0.67
  -1   4 -10    1.21    0.47
   1  -4  10    2.22    0.54
   1  -4  10    1.08    0.61
  -1   4 -11    5.18    0.47
  -1   4 -11    4.91    0.67
   1  -4  11    5.32    0.47
   1  -4  11    4.98    0.61
  -1   4 -11    4.37    0.61
  -1   4 -11    4.44    0.81
   1  -4  11    3.57    0.67
   1  -4  11    4.84    0.67
  -1   4 -12   30.89    1.41
  -1   4 -12   28.46    1.55
   1  -4  12   27.32    1.21
   1  -4  12   29.81    1.48
   1  -4  12   32.63    1.41
   1  -4  12   28.66    1.48
   1  -4  13   40.10    1.68
   1  -4  13   37.75    1.82
  -1   4 -14   13.12    1.01
  -1   4 -14   12.99    0.87
   1  -4  14   14.27    1.01
   1  -4  14   14.94    0.87
  -1   4 -14   14.60    1.08
  -1   4 -14   12.65    1.28
   1  -4  14   15.21    1.08
   1  -4  14   14.60    1.14
  -1   4 -15   17.23    1.21
  -1   4 -15   16.42    1.01
   1  -4  15   18.03    0.94
   1  -4  15   15.95    1.08
  -1   4 -15   17.97    1.48
  -1   4 -15   16.75    1.21
   1  -4  15   18.71    1.21
   1  -4  15   17.23    1.35
  -1   4 -16   26.38    1.35
   1  -4  16   23.28    1.41
   1  -4  16   20.05    1.14
  -1   4 -16   23.35    1.41
  -1   4 -16   23.82    1.75
   1  -4  16   21.60    1.55
   1  -4  16   23.62    1.41
  -1   4 -17   15.88    1.01
  -1   4 -17   13.86    1.08
   1  -4  17   15.41    1.14
   1  -4  17   14.47    0.81
  -1   4 -17   15.48    1.21
  -1   4 -17   12.04    1.41
   1  -4  17   13.73    1.14
   1  -4  17   13.52    1.35
  -1   4 -18    1.55    0.61
  -1   4 -18    1.55    0.47
   1  -4  18    1.28    0.54
   1  -4  18    0.74    0.34
  -1   4 -18    3.50    1.08
  -1   4 -18    2.15    0.74
   1  -4  18    0.47    0.94
   1  -4  18   -0.07    0.81
  -1   4 -19    0.54    0.54
  -1   4 -19    1.08    0.40
   1  -4  19    0.40    0.54
   1  -4  19    1.35    0.40
  -1   4 -19    1.08    1.08
  -1   4 -19    1.61    0.74
   1  -4  19    0.61    1.01
   1  -4  19    1.61    0.87
  -1   4 -20    2.22    0.54
  -1   4 -20    2.89    0.67
   1  -4  20    2.02    0.61
   1  -4  20    2.02    0.40
  -1   4 -20    2.36    1.14
  -1   4 -20    1.75    0.74
   1  -4  20    2.15    1.01
   1  -4  20    2.36    0.94
  -1   4 -21    0.27    0.40
  -1   4 -21    0.27    0.54
   1  -4  21    0.74    0.40
   1  -4  21    1.01    0.54
  -1   4 -21    0.54    1.08
  -1   4 -21    0.00    0.74
   1  -4  21   -1.01    0.94
   1  -4  21   -1.14    0.87
  -1   4 -22    2.36    1.08
  -1   4 -22    3.70    0.87
   1  -4  22    3.90    1.08
   1  -4  22    4.37    1.01
   1  -4  23    1.48    0.94
   1  -4  23   -0.40    0.87
  -1   3  25    4.98    1.35
  -1   3  25    4.37    1.35
   1  -3 -25    4.17    1.21
   1  -3 -25    5.05    1.28
  -1   3  24    1.88    0.47
  -1   3  24    2.89    0.74
   1  -3 -24    0.00    0.27
   1  -3 -24    1.55    0.61
   1  -3 -24    1.28    1.14
  -1   3  23    2.22    0.67
  -1   3  23    0.27    0.40
   1  -3 -23    1.08    0.54
   1  -3 -23    0.00    0.20
   1  -3 -23    1.55    1.08
   1  -3 -23   -0.67    0.94
  -1   3  22    1.14    0.61
  -1   3  22    1.21    0.40
   1  -3 -22   -0.07    0.20
   1  -3 -22    0.07    0.47
  -1   3  22    0.20    1.14
  -1   3  22    0.67    0.94
   1  -3 -22   -0.40    0.94
   1  -3 -22    2.02    0.94
  -1   3  21    6.73    0.81
  -1   3  21    5.65    0.61
  -1   3  21    3.90    1.21
  -1   3  21    6.12    1.14
   1  -3 -21    5.99    1.21
   1  -3 -21    7.67    1.21
  -1   3  20    2.22    0.67
  -1   3  20    2.22    1.01
  -1   3  20    2.36    1.08
   1  -3 -20    3.50    1.08
   1  -3 -20    2.09    1.01
  -1   3  19    3.84    0.67
  -1   3  19    3.84    0.47
  -1   3  19    6.59    1.21
  -1   3  19    4.58    0.94
   1  -3 -19    3.50    1.01
   1  -3 -19    4.04    1.01
  -1   3  18    6.46    0.81
  -1   3  18    5.65    0.54
  -1   3  18    5.05    0.94
  -1   3  18    6.66    1.14
   1  -3 -18    5.38    1.01
   1  -3 -18    5.58    1.01
  -1   3  17   18.30    1.14
  -1   3  17   17.02    0.94
  -1   3  17   17.90    1.55
  -1   3  17   18.71    1.35
   1  -3 -17   15.14    1.21
   1  -3 -17   17.56    1.35
  -1   3  16   31.56    1.61
  -1   3  16   32.84    1.48
   1  -3 -16   32.57    1.55
   1  -3 -16   29.00    1.41
  -1   3  16   28.06    1.75
  -1   3  16   27.59    1.48
   1  -3 -16   31.63    1.61
   1  -3 -16   27.92    1.61
  -1   3  15   -0.07    0.34
  -1   3  15    0.34    0.47
   1  -3 -15    0.00    0.34
   1  -3 -15    0.61    0.40
  -1   3  15   -0.81    0.67
  -1   3  15   -0.34    0.81
   1  -3 -15    0.00    0.67
   1  -3 -15    0.61    0.67
  -1   3  14   56.32    2.42
  -1   3  14   55.31    2.22
   1  -3 -14   57.19    2.29
   1  -3 -14   57.46    2.36
  -1   3  14   55.38    2.22
  -1   3  14   59.42    2.15
   1  -3 -14   56.25    2.09
   1  -3 -14   55.71    2.15
  -1   3  13   16.69    1.01
  -1   3  13   19.04    0.94
   1  -3 -13   18.57    0.94
   1  -3 -13   19.18    1.01
  -1   3  12    4.04    0.54
  -1   3  12    4.17    0.40
   1  -3 -12    3.70    0.47
   1  -3 -12    3.16    0.40
  -1   3  12    3.77    0.81
  -1   3  12    4.17    0.74
   1  -3 -12    3.70    0.74
   1  -3 -12    4.10    0.74
  -1   3  11   60.56    2.49
   1  -3 -11   62.44    2.42
  -1   3  11   60.49    2.15
  -1   3  11   58.81    1.95
   1  -3 -11   62.04    2.09
   1  -3 -11   55.71    1.95
  -1   3  10  156.51    5.79
  -1   3  10  157.12    5.72
   1  -3 -10  149.58    5.52
   1  -3 -10  151.40    5.58
  -1   3  10  164.25    4.44
  -1   3  10  162.16    4.31
   1  -3 -10  156.98    4.17
   1  -3 -10  159.00    4.24
  -1   3   9   14.53    0.74
  -1   3   9   15.61    0.87
   1  -3  -9   14.06    0.74
   1  -3  -9   14.74    0.74
  -1   3   9   15.34    0.94
  -1   3   9   16.08    1.01
   1  -3  -9   17.16    1.01
   1  -3  -9   15.88    1.01
  -1   3   8  368.67   13.19
  -1   3   8  360.06   12.85
   1  -3  -8  391.15   14.00
   1  -3  -8  354.14   12.65
  -1   3   8  385.02    9.35
  -1   3   8  372.51    9.08
   1  -3  -8  391.62    9.49
   1  -3  -8  384.08    9.29
  -1   3   7   10.36    0.81
  -1   3   7   10.83    0.81
   1  -3  -7    8.88    0.74
   1  -3  -7    9.22    0.74
  -1   3   6   77.04    2.83
  -1   3   6   76.30    2.83
   1  -3  -6   77.31    2.83
   1  -3  -6   80.54    2.96
  -1   3   6   73.68    2.15
  -1   3   6   76.10    2.22
   1  -3  -6   77.52    2.22
   1  -3  -6   75.36    2.15
  -1   3   5    1.88    0.27
  -1   3   5    1.41    0.34
   1  -3  -5    1.08    0.27
   1  -3  -5    1.68    0.27
  -1   3   5    1.28    0.54
  -1   3   5    1.41    0.54
   1  -3  -5    0.81    0.54
   1  -3  -5    0.67    0.54
  -1   3   4    0.20    0.27
  -1   3   4    0.67    0.20
   1  -3  -4    0.81    0.27
   1  -3  -4    0.40    0.27
  -1   3   4    1.21    0.54
  -1   3   4    0.34    0.54
   1  -3  -4    0.27    0.47
   1  -3  -4    0.47    0.54
  -1   3   3  834.37   29.54
  -1   3   3  819.57   29.00
   1  -3  -3  861.29   30.48
   1  -3  -3  857.92   30.35
  -1   3   3  832.35   19.38
  -1   3   3  815.53   19.04
   1  -3  -3  857.25   19.98
   1  -3  -3  815.53   19.04
  -1   3   2   50.74    1.88
  -1   3   2   49.52    1.82
   1  -3  -2   48.45    1.82
   1  -3  -2   48.31    1.82
  -1   3   2   50.74    1.55
  -1   3   2   51.48    1.61
   1  -3  -2   46.77    1.48
   1  -3  -2   46.23    1.41
  -1   3   1  344.18   12.25
  -1   3   1  348.22   12.38
   1  -3  -1  340.21   12.11
   1  -3  -1  349.29   12.45
  -1   3   1  347.00    8.28
  -1   3   1  332.40    7.94
   1  -3  -1  332.34    7.94
   1  -3  -1  334.35    8.01
  -1   3   0 2030.08   71.73
  -1   3   0 1925.78   68.10
   1  -3   0 1966.83   69.58
   1  -3   0 2023.35   71.53
  -1   3   0 2006.53   46.36
  -1   3   0 1995.76   46.09
   1  -3   0 1964.14   45.35
   1  -3   0 1967.50   45.42
  -1   3  -1  691.05   24.56
  -1   3  -1  690.38   24.49
   1  -3   1  709.89   25.17
   1  -3   1  747.57   26.51
  -1   3  -1  694.41   16.22
  -1   3  -1  701.14   16.42
   1  -3   1  691.72   16.22
   1  -3   1  687.01   16.01
  -1   3  -2  168.96    6.12
  -1   3  -2  153.08    5.52
   1  -3   2  168.22    6.12
   1  -3   2  159.81    5.79
  -1   3  -2  170.44    4.17
  -1   3  -2  179.73    4.51
   1  -3   2  172.80    4.31
   1  -3   2  175.22    4.31
  -1   3  -3    5.79    0.47
  -1   3  -3    5.99    0.40
   1  -3   3    5.92    0.40
   1  -3   3    5.11    0.54
  -1   3  -3    6.39    0.54
  -1   3  -3    6.06    0.61
   1  -3   3    5.58    0.61
   1  -3   3    6.33    0.54
  -1   3  -4    0.27    0.27
  -1   3  -4   -0.34    0.34
   1  -3   4    0.74    0.40
   1  -3   4    0.61    0.27
  -1   3  -4    1.21    0.54
  -1   3  -4    0.27    0.40
   1  -3   4    0.07    0.40
   1  -3   4   -0.07    0.47
  -1   3  -5  220.17    8.01
  -1   3  -5  203.55    7.33
   1  -3   5  216.20    7.81
   1  -3   5  220.70    8.07
  -1   3  -5  212.43    5.32
  -1   3  -5  211.55    5.25
   1  -3   5  216.87    5.32
   1  -3   5  223.13    5.58
  -1   3  -6  397.40   14.33
  -1   3  -6  401.64   14.40
   1  -3   6  398.35   14.33
   1  -3   6  400.70   14.33
  -1   3  -6  404.20    9.76
  -1   3  -6  389.26    9.35
   1  -3   6  404.13    9.76
   1  -3   6  404.33    9.69
  -1   3  -7    6.06    0.47
  -1   3  -7    5.45    0.61
   1  -3   7    6.12    0.61
   1  -3   7    6.46    0.47
  -1   3  -7    5.72    0.74
  -1   3  -7    5.65    0.61
   1  -3   7    5.72    0.67
   1  -3   7    5.05    0.54
  -1   3  -8  133.43    5.11
  -1   3  -8  130.27    4.84
   1  -3   8  133.36    4.91
   1  -3   8  141.84    5.32
  -1   3  -8  133.97    3.57
  -1   3  -8  134.71    3.77
   1  -3   8  140.77    3.70
   1  -3   8  141.10    3.84
  -1   3  -9    5.99    0.67
   1  -3   9    7.07    0.54
  -1   3  -9    7.40    0.81
  -1   3  -9    9.42    0.74
   1  -3   9    7.74    0.74
   1  -3   9    9.02    0.87
  -1   3 -10   10.03    0.67
  -1   3 -10   10.56    0.81
   1  -3  10    9.82    0.74
   1  -3  10   10.50    0.61
  -1   3 -10    8.21    0.87
   1  -3  10   10.30    0.74
   1  -3  10   10.36    0.87
  -1   3 -11  118.56    4.51
  -1   3 -11  122.73    4.71
   1  -3  11  120.92    4.71
   1  -3  11  117.08    4.37
   1  -3  11  120.92    3.36
   1  -3  11  125.29    3.63
  -1   3 -12    5.58    0.67
  -1   3 -12    5.38    0.54
   1  -3  12    5.38    0.47
   1  -3  12    5.32    0.61
  -1   3 -12    5.05    0.87
  -1   3 -12    5.85    0.74
   1  -3  12    6.86    0.87
  -1   3 -13    9.76    0.81
  -1   3 -13    7.60    0.61
   1  -3  13    8.14    0.61
   1  -3  13    9.35    0.81
  -1   3 -13    6.33    0.87
  -1   3 -14    0.40    0.47
  -1   3 -14    0.34    0.34
   1  -3  14    0.87    0.34
   1  -3  14    0.67    0.47
  -1   3 -14   -0.40    0.74
   1  -3  14    0.67    0.61
   1  -3  14    0.94    0.81
  -1   3 -15   19.78    1.08
  -1   3 -15   17.43    1.14
   1  -3  15   19.31    1.01
   1  -3  15   20.93    1.28
  -1   3 -15   17.97    1.48
  -1   3 -15   19.24    1.28
   1  -3  15   21.87    1.35
   1  -3  15   20.19    1.41
  -1   3 -16    3.63    0.54
  -1   3 -16    2.96    0.61
   1  -3  16    2.62    0.61
   1  -3  16    3.90    0.47
  -1   3 -16    4.17    0.81
  -1   3 -16    3.50    1.01
   1  -3  16    2.02    0.74
   1  -3  16    3.90    0.94
  -1   3 -17    0.07    0.67
  -1   3 -17    0.67    0.81
   1  -3  17    0.61    0.67
   1  -3  17    0.20    0.87
  -1   3 -18  105.44    4.24
  -1   3 -18  101.60    4.04
   1  -3  18   97.63    3.77
   1  -3  18   96.69    3.97
  -1   3 -18  101.67    3.43
  -1   3 -18  100.66    3.70
   1  -3  18  101.94    3.43
   1  -3  18  101.54    3.70
  -1   3 -19    0.00    0.54
  -1   3 -19    0.13    0.34
   1  -3  19    0.54    0.34
   1  -3  19   -0.27    0.47
  -1   3 -19   -0.94    0.67
  -1   3 -19    1.21    1.08
   1  -3  19    1.41    0.87
   1  -3  19    0.74    1.01
  -1   3 -20    2.29    0.47
  -1   3 -20    1.88    0.61
   1  -3  20    2.29    0.40
   1  -3  20    1.14    0.54
  -1   3 -20    1.88    0.87
  -1   3 -20    2.96    1.14
   1  -3  20    2.76    1.08
   1  -3  20    2.22    0.94
  -1   3 -21    1.35    0.40
  -1   3 -21    3.23    0.67
   1  -3  21    1.35    0.40
   1  -3  21    1.41    0.61
  -1   3 -21    2.62    1.08
  -1   3 -21    2.09    0.81
   1  -3  21    1.82    0.94
   1  -3  21    0.20    0.94
  -1   3 -22    2.49    0.54
  -1   3 -22    3.10    0.61
   1  -3  22    2.22    0.47
   1  -3  22    2.69    0.67
  -1   3 -22    2.56    0.87
  -1   3 -22    2.83    1.14
   1  -3  22    1.41    1.14
   1  -3  22    1.48    0.94
  -1   3 -23    4.78    1.01
  -1   3 -23    6.26    1.28
   1  -3  23    5.38    1.14
   1  -3  23    4.37    1.08
  -1   2  25    1.28    1.21
  -1   2  25   -0.34    1.14
   1  -2 -25    0.47    1.14
  -1   2  24    8.01    0.94
  -1   2  24    7.07    0.67
  -1   2  24    5.65    1.41
  -1   2  24    5.92    1.28
   1  -2 -24    6.26    1.28
  -1   2  23    1.82    0.67
  -1   2  23    1.82    0.47
  -1   2  23   -0.67    1.08
  -1   2  23    1.01    1.01
   1  -2 -23    1.61    0.94
   1  -2 -23    1.82    1.08
  -1   2  22   -0.27    0.40
  -1   2  22    0.81    0.61
   1  -2 -22    0.67    0.40
   1  -2 -22   -0.13    0.47
  -1   2  22    0.20    0.94
  -1   2  22   -0.27    1.01
   1  -2 -22   -0.40    0.87
   1  -2 -22   -0.07    0.94
  -1   2  21    1.21    0.40
   1  -2 -21    1.95    0.61
   1  -2 -21    1.41    0.47
  -1   2  21    3.03    1.01
  -1   2  21    2.56    1.08
   1  -2 -21    1.88    1.01
   1  -2 -21    1.21    1.01
  -1   2  20    4.64    0.54
  -1   2  20    5.72    0.81
   1  -2 -20    5.32    0.61
   1  -2 -20    4.98    0.67
  -1   2  20    6.33    1.08
  -1   2  20    5.85    1.21
   1  -2 -20    6.46    1.14
   1  -2 -20    6.19    1.14
  -1   2  19   17.09    0.94
[truncated: 3,902,009 more chars]
