# Supplementary material for: Investigating the Conformations of a Family of [M2L3]4+ Helicates Using Single Crystal X-ray Diffraction
Source: Molecules. 2023 Feb 1;28(3):1404. doi: 10.3390/molecules28031404 (PMC9921459; doi:10.3390/molecules28031404)
Supplement: Supplementary file 1 [file molecules-28-01404-s001.zip › Final cifs/2224288.cif]

####################################################################### 
# 
# This file contains crystal structure data downloaded from the 
# Cambridge Structural Database (CSD) hosted by the Cambridge 
# Crystallographic Data Centre (CCDC).
# 
# Full information about CCDC data access policies and citation 
# guidelines are available at http://www.ccdc.cam.ac.uk/access/V1 
# 
# Audit and citation data items may have been added by the CCDC. 
# Please retain this information to preserve the provenance of 
# this file and to allow appropriate attribution of the data. 
# 
#######################################################################
data_cut83_a
_audit_creation_date               2022-12-05
_audit_creation_method
;
Olex2 1.5
(compiled 2022.04.07 svn.rca3783a0 for OlexSys, GUI svn.r6498)
;
_shelx_SHELXL_version_number       2018/3
loop_
  _audit_author_name
  _audit_author_address
 'Matthew Wallis'
;
Western Sydney University
Australia
;

_audit_contact_author_address      ?
_audit_contact_author_email        ?
_audit_contact_author_name         ''
_audit_contact_author_phone        ?
_audit_update_record
;
2022-12-05 deposited with the CCDC.	2022-12-05 downloaded from the CCDC.
;
_publ_contact_author_id_orcid      ?
_publ_section_references
;
Dolomanov, O.V., Bourhis, L.J., Gildea, R.J, Howard, J.A.K. & Puschmann, H.
 (2009), J. Appl. Cryst. 42, 339-341.

Sheldrick, G.M. (2015). Acta Cryst. C71, 3-8.
;
_chemical_name_common              ?
_chemical_name_systematic          ?
_chemical_formula_moiety          
 'C90 H66 Cu2 N24 O3, 4(B F4), 5.5(C2 H3 N), 0.778(C4 H10 O), 0.167(C4 O), 0.167(O)'
_chemical_formula_sum              'C104.78 H90.28 B4 Cu2 F16 N29.50 O4.11'
_chemical_formula_weight           2302.78
_chemical_melting_point            ?
# end Validation Reply Form
_chemical_properties_physical      Efflorescent
loop_
  _atom_type_symbol
  _atom_type_description
  _atom_type_scat_dispersion_real
  _atom_type_scat_dispersion_imag
  _atom_type_scat_source
 C C 0.0033 0.0016 'International Tables Vol C Tables 4.2.6.8 and 6.1.1.4'
 H H 0.0000 0.0000 'International Tables Vol C Tables 4.2.6.8 and 6.1.1.4'
 B B 0.0013 0.0007 'International Tables Vol C Tables 4.2.6.8 and 6.1.1.4'
 Cu Cu 0.3201 1.2651 'International Tables Vol C Tables 4.2.6.8 and 6.1.1.4'
 F F 0.0171 0.0103 'International Tables Vol C Tables 4.2.6.8 and 6.1.1.4'
 N N 0.0061 0.0033 'International Tables Vol C Tables 4.2.6.8 and 6.1.1.4'
 O O 0.0106 0.0060 'International Tables Vol C Tables 4.2.6.8 and 6.1.1.4'

_shelx_space_group_comment
;
The symmetry employed for this shelxl refinement is uniquely defined
by the following loop, which should always be used as a source of
symmetry information in preference to the above space-group names.
They are only intended as comments.
;
_space_group_crystal_system        'triclinic'
_space_group_IT_number             2
_space_group_name_H-M_alt          'P -1'
_space_group_name_Hall             '-P 1'
loop_
  _space_group_symop_operation_xyz
 'x, y, z'
 '-x, -y, -z'

_cell_length_a                     19.950(4)
_cell_length_b                     20.310(4)
_cell_length_c                     40.550(8)
_cell_angle_alpha                  91.68(3)
_cell_angle_beta                   99.57(3)
_cell_angle_gamma                  94.23(3)
_cell_volume                       16143(6)
_cell_formula_units_Z              6
_cell_measurement_reflns_used      3322
_cell_measurement_temperature      100
_cell_measurement_theta_max        20.00
_cell_measurement_theta_min        2.40
_shelx_estimated_absorpt_T_max     0.953
_shelx_estimated_absorpt_T_min     0.828
_exptl_absorpt_coefficient_mu      0.490
_exptl_absorpt_correction_T_max    ?
_exptl_absorpt_correction_T_min    ?
_exptl_absorpt_correction_type     none
_exptl_absorpt_process_details     ?
_exptl_absorpt_special_details     ?
_exptl_crystal_colour              'clear orange'
_exptl_crystal_colour_lustre       clear
_exptl_crystal_colour_primary      orange
_exptl_crystal_density_diffrn      1.421
_exptl_crystal_density_meas        ?
_exptl_crystal_density_method      ?
_exptl_crystal_description         plate
_exptl_crystal_F_000               7082
_exptl_crystal_preparation         ?
_exptl_crystal_recrystallization_method 
 'Vapour fiddusion of diethyl ether into acetonitrile'
_exptl_crystal_size_max            0.4
_exptl_crystal_size_mid            0.2
_exptl_crystal_size_min            0.1
_exptl_transmission_factor_max     ?
_exptl_transmission_factor_min     ?
_diffrn_reflns_av_R_equivalents    0.0378
_diffrn_reflns_av_unetI/netI       0.0231
_diffrn_reflns_Laue_measured_fraction_full  0.981
_diffrn_reflns_Laue_measured_fraction_max  0.957
_diffrn_reflns_limit_h_max         24
_diffrn_reflns_limit_h_min         -24
_diffrn_reflns_limit_k_max         24
_diffrn_reflns_limit_k_min         -24
_diffrn_reflns_limit_l_max         50
_diffrn_reflns_limit_l_min         -50
_diffrn_reflns_number              380367
_diffrn_reflns_point_group_measured_fraction_full  0.981
_diffrn_reflns_point_group_measured_fraction_max  0.957
_diffrn_reflns_theta_full          25.242
_diffrn_reflns_theta_max           26.022
_diffrn_reflns_theta_min           1.006
_diffrn_ambient_temperature        100
_diffrn_detector_area_resol_mean   ?
_diffrn_measured_fraction_theta_full  0.981
_diffrn_measured_fraction_theta_max  0.957
_diffrn_measurement_device_type    'Australian Synchrotron MX1'
_diffrn_measurement_method         '\w scans'
_diffrn_radiation_monochromator    graphite
_diffrn_radiation_type             MoK\a
_diffrn_radiation_wavelength       0.71073
_diffrn_source                     ?
_diffrn_special_details            ?
_diffrn_standards_number           0
_reflns_Friedel_coverage           0.000
_reflns_Friedel_fraction_full      .
_reflns_Friedel_fraction_max       .
_reflns_number_gt                  51462
_reflns_number_total               60876
_reflns_special_details
;
 Reflections were merged by SHELXL according to the crystal
 class for the calculation of statistics and refinement.
 
 _reflns_Friedel_fraction is defined as the number of unique
 Friedel pairs measured divided by the number that would be
 possible theoretically, ignoring centric projections and
 systematic absences.
;
_reflns_threshold_expression       'I > 2\s(I)'
_computing_cell_refinement         ?
_computing_data_collection         ?
_computing_data_reduction          ?
_computing_molecular_graphics      'Olex2 1.5 (Dolomanov et al., 2009)'
_computing_publication_material    'Olex2 1.5 (Dolomanov et al., 2009)'
_computing_structure_refinement    'SHELXL 2018/3 (Sheldrick, 2015)'
_computing_structure_solution      'SHELXT 2018/2 (Sheldrick, 2018)'
_refine_diff_density_max           1.721
_refine_diff_density_min           -0.913
_refine_diff_density_rms           0.078
_refine_ls_extinction_coef         .
_refine_ls_extinction_method       none
_refine_ls_goodness_of_fit_ref     1.021
_refine_ls_hydrogen_treatment      constr
_refine_ls_matrix_type             full
_refine_ls_number_parameters       4527
_refine_ls_number_reflns           60876
_refine_ls_number_restraints       774
_refine_ls_R_factor_all            0.0692
_refine_ls_R_factor_gt             0.0601
_refine_ls_restrained_S_all        1.024
_refine_ls_shift/su_max            0.003
_refine_ls_shift/su_mean           0.000
_refine_ls_structure_factor_coef   Fsqd
_refine_ls_weighting_details      
 'w=1/[\s^2^(Fo^2^)+(0.1111P)^2^+16.6379P] where P=(Fo^2^+2Fc^2^)/3'
_refine_ls_weighting_scheme        calc
_refine_ls_wR_factor_gt            0.1739
_refine_ls_wR_factor_ref           0.1838
_refine_special_details            ?
_olex2_refinement_description
;
1. Others
 Fixed Sof: O1EW(0.6667) C4EW(0.6667) H4EA(0.6667) H4EB(0.6667) H4EC(0.6667)
 C2EW(0.6667) H2EA(0.6667) H2EB(0.6667) C1EW(0.6667) H1EA(0.6667) H1EB(0.6667)
 H1EC(0.6667) C3EW(0.6667) H3EA(0.6667) H3EB(0.6667) C2ET(0.6667) H2EE(0.6667)
 H2EF(0.6667) O1ET(0.6667) C3ET(0.6667) H3EE(0.6667) H3EF(0.6667) C1ET(0.6667)
 H1EG(0.6667) H1EH(0.6667) H1EI(0.6667) C4ET(0.6667) H4EG(0.6667) H4EH(0.6667)
 H4EI(0.6667) C1EV(0.5) C2EV(0.5) O1EV(0.5) C3EV(0.5) C4EV(0.5) O1W(0.5)
 N1T3(0.3333) N1T5(0.3333) C2T3(0.3333) H2TM(0.3333) H2TN(0.3333) H2TO(0.3333)
 C1T5(0.3333) C2T5(0.3333) H2TP(0.3333) H2TQ(0.3333) H2TR(0.3333) C1T3(0.3333)
 N1T8(0.5) C1T8(0.5) C2T8(0.5) H2TV(0.5) H2TW(0.5) H2TX(0.5) N1T7(0.3333)
 C1T7(0.3333) C2T7(0.3333) H2TY(0.3333) HB(0.3333) HC(0.3333)
 Fixed Uiso: H22H(0.037) H22E(0.04) H11G(0.041) H9G(0.039) H21G(0.042)
 H24G(0.044) H15I(0.039) H22B(0.039) H17H(0.042) H9H(0.04) H21B(0.041)
 H18H(0.04) H25G(0.039) H24H(0.04) H11I(0.042) H20I(0.041) H24A(0.042)
 H24E(0.04) H22C(0.041) H21H(0.039) H20B(0.04) H25B(0.039) H6I(0.04)
 H15H(0.039) H14G(0.041) H24C(0.044) H21E(0.043) H14I(0.039) H6D(0.042)
 H7I(0.041) H25D(0.041) H6B(0.043) H24B(0.04) H20H(0.037) H6H(0.04) H27G(0.044)
 H21A(0.049) H15G(0.041) H12I(0.043) H11H(0.044) H25A(0.039) H20D(0.047)
 H22I(0.04) H25H(0.04) H2I(0.044) H25I(0.044) H6E(0.042) H7H(0.044) H20A(0.045)
 H22G(0.044) H20G(0.041) H6G(0.042) H9I(0.04) H21D(0.05) H22A(0.042)
 H17B(0.049) H17G(0.045) H24D(0.048) H25C(0.045) H9E(0.047) H22F(0.048)
 H4I(0.046) H12G(0.041) H21I(0.04) H12H(0.045) H14B(0.05) H14H(0.042)
 H7G(0.042) H14A(0.052) H18G(0.043) H20C(0.048) H7E(0.046) H24I(0.045)
 H6A(0.044) H4H(0.051) H14E(0.049) H18I(0.047) H12E(0.052) H11B(0.048)
 H20E(0.043) H37(0.049) H22D(0.049) H18B(0.045) H4D(0.048) H25E(0.044)
 H25F(0.046) H18C(0.05) H11E(0.049) H30G(0.049) H27D(0.053) H5D(0.05) H7B(0.05)
 H4E(0.049) H29G(0.046) H29D(0.051) H12B(0.05) H6C(0.044) H7C(0.053) H9D(0.054)
 H2D(0.05) H18E(0.049) H26G(0.048) H29E(0.055) H2E(0.048) H9B(0.051)
 H24F(0.053) H7D(0.054) H27B(0.049) H17I(0.045) H14C(0.051) H6F(0.051)
 H27H(0.052) H30D(0.055) H2H(0.055) H17E(0.051) H29C(0.052) H15A(0.05)
 H15C(0.052) H1D(0.055) H9A(0.055) H29B(0.057) H15E(0.048) H15B(0.05)
 H9F(0.055) H2A(0.052) H17C(0.056) H21C(0.052) H30A(0.054) H1E(0.051)
 H2G(0.054) H14F(0.054) H1B(0.061) H7A(0.055) H4A(0.057) H27A(0.062)
 H26B(0.058) H29A(0.051) H4G(0.056) H14D(0.065) H18D(0.056) H26D(0.057)
 H5I(0.053) H27I(0.053) H11C(0.056) H9C(0.049) H2B(0.055) H18A(0.054)
 H30E(0.066) H27E(0.053) H2C(0.054) H26H(0.06) H18F(0.061) H4C(0.062)
 H4B(0.059) H29I(0.053) H17F(0.066) H5A(0.065) H15F(0.054) H5E(0.056)
 H11A(0.058) H1A(0.056) H17A(0.058) H1H(0.06) H26I(0.063) H20F(0.063)
 H30H(0.066) H29H(0.058) H30B(0.068) H5H(0.058) H17D(0.061) H12A(0.058)
 H12C(0.057) H15D(0.061) H30C(0.063) H7F(0.063) H29F(0.067) H1G(0.059)
 H30I(0.065) H5C(0.075) H5G(0.063) H1C(0.067) H12D(0.075) H26A(0.07)
 H26E(0.062) H11D(0.076) H27C(0.065) H5B(0.065) H26C(0.076) H21F(0.067)
 H27F(0.073) H26F(0.083) H30F(0.081) H11F(0.082) H12F(0.091) H1F(0.083)
 H2F(0.075) H2SA(0.115) H2SB(0.115) H2SC(0.115) H4F(0.108) H2SD(0.109)
 H2SE(0.109) H2SF(0.109) H2SG(0.114) H2SH(0.114) H2SI(0.114) H2J(0.099)
 H2K(0.099) H2L(0.099) H2SJ(0.085) H2SK(0.085) H2SL(0.085) H2SM(0.097)
 H2SN(0.097) H2SO(0.097) H2TA(0.154) H2TB(0.154) H2TC(0.154) H2TD(0.118)
 H2TE(0.118) H2TF(0.118) H2SP(0.111) H2SQ(0.111) H2SR(0.111) H2TG(0.245)
 H2TH(0.245) H2TI(0.245) H4EA(0.103) H4EB(0.103) H4EC(0.103) H2EA(0.065)
 H2EB(0.065) H1EA(0.089) H1EB(0.089) H1EC(0.089) H3EA(0.076) H3EB(0.076)
 H2SS(0.111) H2ST(0.111) H2SU(0.111) H2TJ(0.086) H2TK(0.086) H2TL(0.086)
 H3EC(0.154) H3ED(0.154) H1ED(0.137) H1EE(0.137) H1EF(0.137) H2EC(0.132)
 H2ED(0.132) H4ED(0.166) H4EE(0.166) H4EF(0.166) H2SV(0.121) H2SW(0.121)
 H2SX(0.121) H2SY(0.12) H(0.12) HA(0.12) H2EE(0.082) H2EF(0.082) H3EE(0.085)
 H3EF(0.085) H1EG(0.113) H1EH(0.113) H1EI(0.113) H4EG(0.189) H4EH(0.189)
 H4EI(0.189) H5F(0.131) H2TM(0.105) H2TN(0.105) H2TO(0.105) H2TP(0.116)
 H2TQ(0.116) H2TR(0.116) H2TS(0.176) H2TT(0.176) H2TU(0.176) H2TV(0.137)
 H2TW(0.137) H2TX(0.137) H2TY(0.114) HB(0.114) HC(0.114)
 Fixed X: H22H(0.556668) H22E(0.881403) H11G(0.346299) H9G(0.448941)
 H21G(0.561753) H24G(0.295058) H15I(0.142782) H22B(-0.233977) H17H(0.41744)
 H9H(0.134581) H21B(-0.033803) H18H(0.472604) H25G(0.330776) H24H(0.659019)
 H11I(0.279739) H20I(0.205721) H24A(0.002679) H24E(0.992554) H22C(0.072784)
 H21H(0.335627) H20B(-0.078315) H25B(-0.197036) H6I(0.320586) H15H(0.335095)
 H14G(0.49842) H24C(0.040771) H21E(0.678061) H14I(0.104351) H6D(0.576764)
 H7I(0.325066) H25D(0.665605) H6B(0.15186) H24B(-0.33715) H20H(0.386994)
 H6H(0.144975) H27G(0.261145) H21A(-0.270242) H15G(0.44704) H12I(0.239106)
 H11H(0.176463) H25A(-0.000681) H20D(0.877645) H22I(0.237423) H25H(0.519851)
 H2I(0.323368) H25I(0.459953) H6E(0.480329) H7H(0.032204) H20A(-0.225691)
 H22G(0.365707) H20G(0.5291) H6G(0.247741) H9I(0.256975) H21D(0.91252) H22A(-
 0.07501) H17B(-0.085806) H17G(0.371533) H24D(0.671397) H25C(-0.13859)
 H9E(0.467452) H22F(0.584266) H4I(0.43495) H12G(0.401315) H21I(0.138628)
 H12H(0.228955) H14B(-0.079739) H14H(0.385101) H7G(0.451103) H14A(-0.156891)
 H18G(0.33891) H20C(0.041074) H7E(0.366182) H24I(0.264109) H6A(0.070401) H4H(-
 0.053018) H14E(0.715893) H18I(0.323124) H12E(0.54683) H11B(0.128927)
 H20E(0.731564) H37(0.385526) H22D(0.739374) H18B(-0.133212) H4D(0.784826)
 H25E(0.864943) H25F(0.800915) H18C(0.065781) H11E(0.501645) H30G(0.175315)
 H27D(0.61041) H5D(0.784461) H7B(0.273104) H4E(0.275859) H29G(0.240721)
 H29D(0.597216) H12B(0.081678) H6C(-0.024148) H7C(0.013867) H9D(0.791541)
 H2D(0.578574) H18E(0.767172) H26G(0.192371) H29E(0.954414) H2E(0.397145)
 H9B(0.172014) H24F(0.622713) H7D(0.781835) H27B(-0.412729) H17I(0.253779)
 H14C(0.218013) H6F(0.64796) H27H(0.729475) H30D(0.525443) H2H(0.070527)
 H17E(0.71023) H29C(-0.134662) H15A(-0.102302) H15C(0.174734) H1D(0.585821)
 H9A(-0.155489) H29B(-0.282154) H15E(0.671251) H15B(-0.032172) H9F(0.574638)
 H2A(0.084579) H17C(0.129156) H21C(0.103547) H30A(0.144614) H1E(0.300894)
 H2G(0.257281) H14F(0.425873) H1B(0.330078) H7A(-0.132031) H4A(-0.120874)
 H27A(0.070806) H26B(-0.493982) H29A(0.070663) H4G(0.463332) H14D(0.806143)
 H18D(0.694571) H26D(0.536047) H5I(0.495542) H27I(0.301048) H11C(-0.016242)
 H9C(0.061368) H2B(0.23573) H18A(-0.038743) H30E(1.047765) H27E(1.075228) H2C(-
 0.005767) H26H(0.809357) H18F(0.584353) H4C(-0.082427) H4B(0.359639)
 H29I(0.449715) H17F(0.52028) H5A(-0.102753) H15F(0.461772) H5E(0.18459) H11A(-
 0.131) H1A(0.094637) H17A(-0.082551) H1H(-0.016802) H26I(0.317445)
 H20F(0.617477) H30H(0.693248) H29H(0.608868) H30B(-0.367348) H5H(-0.134674)
 H17D(0.729199) H12A(-0.184317) H12C(0.027145) H15D(0.747312) H30C(-0.157282)
 H7F(0.604326) H29F(0.793762) H1G(0.27131) H30I(0.462855) H5C(-0.120298)
 H5G(0.470021) H1C(-0.050694) H12D(0.797711) H26A(0.144166) H26E(1.164637)
 H11D(0.739125) H27C(0.000482) H5B(0.449016) H26C(-0.024175) H21F(0.552506)
 H27F(0.678165) H26F(0.707456) H30F(0.819143) H11F(0.649657) H12F(0.614567)
 H1F(0.661968) H2F(0.643571) H2SA(0.770289) H2SB(0.822232) H2SC(0.850556)
 H4F(0.661661) H2SD(0.497757) H2SE(0.419363) H2SF(0.473561) H2SG(0.143034)
 H2SH(0.175186) H2SI(0.220323) H2J(0.091038) H2K(0.092533) H2L(0.027132)
 H2SJ(0.335629) H2SK(0.359731) H2SL(0.318212) H2SM(-0.039393) H2SN(-0.010265)
 H2SO(0.004128) H2TA(0.3151) H2TB(0.332897) H2TC(0.290711) H2TD(0.476739)
 H2TE(0.538695) H2TF(0.547487) H2SP(0.327886) H2SQ(0.304624) H2SR(0.349746)
 H2TG(0.56935) H2TH(0.509798) H2TI(0.574987) H4EA(0.818058) H4EB(0.870334)
 H4EC(0.814746) H2EA(0.651652) H2EB(0.6648) H1EA(0.576731) H1EB(0.551325)
 H1EC(0.592966) H3EA(0.783589) H3EB(0.777328) H2SS(0.524932) H2ST(0.527502)
 H2SU(0.54859) H2TJ(0.068832) H2TK(0.097251) H2TL(0.033102) H3EC(0.224965)
 H3ED(0.148294) H1ED(0.174034) H1EE(0.113848) H1EF(0.188667) H2EC(0.0993)
 H2ED(0.122364) H4ED(0.190838) H4EE(0.147871) H4EF(0.114145) H2SV(0.713184)
 H2SW(0.702766) H2SX(0.765751) H2SY(-0.179947) H(-0.114146) HA(-0.183362)
 H2EE(0.089486) H2EF(0.029606) H3EE(0.001272) H3EF(-0.019124) H1EG(0.079267)
 H1EH(0.135649) H1EI(0.133851) H4EG(-0.112347) H4EH(-0.079286) H4EI(-0.104952)
 H5F(0.67888) H2TM(-0.1506) H2TN(-0.125677) H2TO(-0.201315) H2TP(0.649198)
 H2TQ(0.639217) H2TR(0.599252) H2TS(0.222907) H2TT(0.155503) H2TU(0.220208)
 H2TV(0.517255) H2TW(0.587482) H2TX(0.538043) H2TY(-0.0869) HB(-0.144879) HC(-
 0.142223)
 Fixed Y: H22H(1.575059) H22E(1.570401) H11G(1.788615) H9G(1.893167)
 H21G(1.781124) H24G(1.636989) H15I(1.819041) H22B(1.423226) H17H(1.660744)
 H9H(1.751368) H21B(1.533884) H18H(1.64959) H25G(1.453611) H24H(1.573398)
 H11I(1.901577) H20I(1.555165) H24A(1.339259) H24E(1.572838) H22C(1.548878)
 H21H(1.471539) H20B(1.539118) H25B(1.469163) H6I(2.046155) H15H(1.755744)
 H14G(1.961226) H24C(1.680456) H21E(1.454772) H14I(1.740306) H6D(1.903691)
 H7I(2.101104) H25D(1.481144) H6B(0.989942) H24B(1.425268) H20H(1.462087)
 H6H(2.005539) H27G(1.594846) H21A(1.229976) H15G(1.968394) H12I(1.824468)
 H11H(1.706079) H25A(1.525393) H20D(1.692921) H22I(1.45323) H25H(1.517445)
 H2I(2.174682) H25I(1.357751) H6E(1.991283) H7H(1.835391) H20A(1.306182)
 H22G(1.704349) H20G(1.69025) H6G(1.907333) H9I(1.984414) H21D(1.772369)
 H22A(1.277147) H17B(1.336778) H17G(1.842364) H24D(1.66783) H25C(1.629386)
 H9E(1.737618) H22F(1.450861) H4I(2.158331) H12G(1.779393) H21I(1.642881)
 H12H(1.61134) H14B(1.348234) H14H(1.658511) H7G(1.908277) H14A(1.042974)
 H18G(1.753006) H20C(1.370217) H7E(1.818846) H24I(1.318523) H6A(1.082087)
 H4H(1.893139) H14E(1.634618) H18I(1.609033) H12E(1.594904) H11B(1.294935)
 H20E(1.45456) H37(2.275203) H22D(1.728096) H18B(1.342564) H4D(1.93299)
 H25E(1.54271) H25F(1.375948) H18C(1.46974) H11E(1.690655) H30G(1.377102)
 H27D(1.632097) H5D(1.944978) H7B(1.158753) H4E(1.874132) H29G(1.413929)
 H29D(1.446032) H12B(1.392346) H6C(0.904721) H7C(0.887821) H9D(1.898966)
 H2D(1.905935) H18E(1.653223) H26G(1.552968) H29E(1.511036) H2E(2.044958)
 H9B(1.242801) H24F(1.319917) H7D(1.914901) H27B(1.393965) H17I(1.694327)
 H14C(1.202161) H6F(2.082241) H27H(1.608375) H30D(1.414708) H2H(2.062035)
 H17E(1.654109) H29C(1.731752) H15A(1.022714) H15C(1.119449) H1D(1.92027)
 H9A(1.106726) H29B(1.506593) H15E(1.731714) H15B(1.250906) H9F(1.9701)
 H2A(1.088493) H17C(1.384795) H21C(1.285629) H30A(1.596154) H1E(2.098332)
 H2G(1.90578) H14F(1.760339) H1B(0.878659) H7A(1.091235) H4A(1.072292)
 H27A(1.375391) H26B(1.398688) H29A(1.562853) H4G(1.931159) H14D(1.966849)
 H18D(1.769474) H26D(1.594852) H5I(2.257218) H27I(1.209695) H11C(1.173474)
 H9C(1.019744) H2B(0.934358) H18A(1.240805) H30E(1.516819) H27E(1.606204)
 H2C(0.782122) H26H(1.600756) H18F(1.530113) H4C(0.801804) H4B(1.102837)
 H29I(1.256827) H17F(1.614684) H5A(1.068761) H15F(1.836733) H5E(1.933339)
 H11A(1.209363) H1A(1.079326) H17A(1.167665) H1H(2.118596) H26I(1.098426)
 H20F(1.632542) H30H(1.466538) H29H(1.468556) H30B(1.505031) H5H(1.95492)
 H17D(1.847649) H12A(1.230403) H12C(1.254523) H15D(1.979296) H30C(1.841437)
 H7F(2.10362) H29F(1.270784) H1G(1.921053) H30I(1.145318) H5C(0.690811)
 H5G(1.94586) H1C(0.672966) H12D(1.770605) H26A(1.416295) H26E(1.607165)
 H11D(1.782278) H27C(1.787062) H5B(1.042153) H26C(1.89532) H21F(1.715959)
 H27F(1.218636) H26F(1.111562) H30F(1.16162) H11F(1.853963) H12F(1.775857)
 H1F(2.308513) H2F(2.195129) H2SA(1.731299) H2SB(1.746749) H2SC(1.72909)
 H4F(2.204647) H2SD(2.267047) H2SE(2.244767) H2SF(2.249593) H2SG(1.716229)
 H2SH(1.744263) H2SI(1.747417) H2J(1.588185) H2K(1.643247) H2L(1.591766)
 H2SJ(1.984357) H2SK(1.9577) H2SL(1.908571) H2SM(2.038395) H2SN(2.015103)
 H2SO(2.090235) H2TA(2.013116) H2TB(2.089691) H2TC(2.043242) H2TD(1.752585)
 H2TE(1.804307) H2TF(1.726671) H2SP(1.704847) H2SQ(1.77836) H2SR(1.74896)
 H2TG(1.373987) H2TH(1.375516) H2TI(1.427788) H4EA(1.722348) H4EB(1.768463)
 H4EC(1.80085) H2EA(1.777742) H2EB(1.70077) H1EA(1.756618) H1EB(1.708627)
 H1EC(1.680626) H3EA(1.720749) H3EB(1.799174) H2SS(1.601316) H2ST(1.602875)
 H2SU(1.539068) H2TJ(1.768916) H2TK(1.761256) H2TL(1.803299) H3EC(2.069268)
 H3ED(2.036899) H1ED(1.972859) H1EE(1.91745) H1EF(1.910817) H2EC(2.007069)
 H2ED(1.948188) H4ED(2.150095) H4EE(2.151463) H4EF(2.117328) H2SV(1.797402)
 H2SW(1.750605) H2SX(1.742978) H2SY(1.542236) H(1.526537) HA(1.540549)
 H2EE(1.226269) H2EF(1.232246) H3EE(1.2144) H3EF(1.28485) H1EG(1.323981)
 H1EH(1.327002) H1EI(1.269659) H4EG(1.27975) H4EH(1.243135) H4EI(1.201882)
 H5F(2.320495) H2TM(1.80013) H2TN(1.727176) H2TO(1.737602) H2TP(1.752906)
 H2TQ(1.704907) H2TR(1.770445) H2TS(1.399802) H2TT(1.389813) H2TU(1.435115)
 H2TV(1.197282) H2TW(1.168392) H2TX(1.194293) H2TY(1.251275) HB(1.267287)
 HC(1.193943)
 Fixed Z: H22H(0.885688) H22E(0.555681) H11G(0.963106) H9G(1.039031)
 H21G(0.879645) H24G(0.712714) H15I(0.939645) H22B(0.78233) H17H(0.95345)
 H9H(1.011941) H21B(0.726291) H18H(0.906832) H25G(0.741696) H24H(0.84056)
 H11I(0.886291) H20I(0.7859) H24A(0.95419) H24E(0.515606) H22C(0.832685)
 H21H(0.936284) H20B(0.776106) H25B(0.910279) H6I(1.045275) H15H(1.035758)
 H14G(0.940276) H24C(0.84518) H21E(0.603686) H14I(0.895801) H6D(0.770995)
 H7I(0.951056) H25D(0.408131) H6B(0.634971) H24B(0.827357) H20H(0.888726)
 H6H(1.023672) H27G(0.661312) H21A(0.783986) H15G(0.987834) H12I(0.841982)
 H11H(0.960567) H25A(0.923155) H20D(0.514495) H22I(0.824157) H25H(0.758779)
 H2I(1.054475) H25I(0.804453) H6E(0.702509) H7H(1.030871) H20A(0.827908)
 H22G(0.770378) H20G(0.841584) H6G(1.102583) H9I(0.918634) H21D(0.558387)
 H22A(0.894271) H17B(0.716768) H17G(0.857998) H24D(0.377332) H25C(0.873764)
 H9E(0.684119) H22F(0.497552) H4I(0.979926) H12G(0.916545) H21I(0.791873)
 H12H(0.946934) H14B(0.639706) H14H(1.023467) H7G(1.108793) H14A(0.738239)
 H18G(0.819592) H20C(0.868039) H7E(0.699935) H24I(0.813139) H6A(0.569557)
 H4H(1.039771) H14E(0.68914) H18I(0.875155) H12E(0.618955) H11B(0.700173)
 H20E(0.556487) H37(1.071074) H22D(0.439467) H18B(0.765959) H4D(0.84017)
 H25E(0.427707) H25F(0.459095) H18C(0.784958) H11E(0.636339) H30G(0.648785)
 H27D(0.329302) H5D(0.897092) H7B(0.643687) H4E(0.701797) H29G(0.699933)
 H29D(0.361923) H12B(0.713557) H6C(0.618035) H7C(0.717761) H9D(0.715812)
 H2D(0.826167) H18E(0.566698) H26G(0.612503) H29E(0.404599) H2E(0.719571)
 H9B(0.657235) H24F(0.48775) H7D(0.786286) H27B(0.864467) H17I(0.882132)
 H14C(0.766256) H6F(0.718955) H27H(0.799109) H30D(0.312121) H2H(1.045239)
 H17E(0.613015) H29C(0.898295) H15A(0.692288) H15C(0.725651) H1D(0.883675)
 H9A(0.612533) H29B(0.935212) H15E(0.706231) H15B(0.625487) H9F(0.60213)
 H2A(0.517746) H17C(0.768535) H21C(0.850888) H30A(1.01735) H1E(0.725587)
 H2G(1.156597) H14F(0.573902) H1B(0.613061) H7A(0.54314) H4A(0.48905)
 H27A(1.000421) H26B(0.899425) H29A(0.968159) H4G(1.164403) H14D(0.602252)
 H18D(0.494876) H26D(0.280881) H5I(1.000094) H27I(0.82904) H11C(0.726179)
 H9C(0.733739) H2B(0.620968) H18A(0.830416) H30E(0.377355) H27E(0.484675)
 H2C(0.618564) H26H(0.763646) H18F(0.543319) H4C(0.704574) H4B(0.637824)
 H29I(0.774442) H17F(0.559211) H5A(0.433957) H15F(0.618508) H5E(0.709703)
 H11A(0.662172) H1A(0.461697) H17A(0.784702) H1H(1.061043) H26I(0.819825)
 H20F(0.462863) H30H(0.70557) H29H(0.738411) H30B(0.967348) H5H(1.057794)
 H17D(0.539413) H12A(0.708688) H12C(0.768414) H15D(0.647467) H30C(0.902846)
 H7F(0.619872) H29F(0.433056) H1G(1.214324) H30I(0.76851) H5C(0.698035)
 H5G(1.221994) H1C(0.613878) H12D(0.612601) H26A(1.048455) H26E(0.454853)
 H11D(0.657666) H27C(0.837633) H5B(0.628184) H26C(0.846163) H21F(0.478855)
 H27F(0.50278) H26F(0.496412) H30F(0.429807) H11F(0.594559) H12F(0.550399)
 H1F(0.731341) H2F(0.725991) H2SA(0.977113) H2SB(1.011486) H2SC(0.97789)
 H4F(0.629319) H2SD(0.707417) H2SE(0.693305) H2SF(0.668307) H2SG(0.636321)
 H2SH(0.673306) H2SI(0.644166) H2J(0.66633) H2K(0.695549) H2L(0.685326)
 H2SJ(0.790294) H2SK(0.826772) H2SL(0.797639) H2SM(0.839207) H2SN(0.875827)
 H2SO(0.866453) H2TA(0.55174) H2TB(0.546193) H2TC(0.516103) H2TD(1.137355)
 H2TE(1.132807) H2TF(1.130924) H2SP(1.132677) H2SQ(1.12878) H2SR(1.103574)
 H2TG(0.608686) H2TH(0.630645) H2TI(0.638855) H4EA(0.756283) H4EB(0.783024)
 H4EC(0.756641) H2EA(0.808074) H2EB(0.810241) H1EA(0.756631) H1EB(0.783438)
 H1EC(0.756306) H3EA(0.809903) H3EB(0.808815) H2SS(0.986316) H2ST(1.025989)
 H2SU(1.007278) H2TJ(0.741661) H2TK(0.780539) H2TL(0.76946) H3EC(0.875642)
 H3ED(0.870724) H1ED(0.774449) H1EE(0.776748) H1EF(0.797258) H2EC(0.810536)
 H2ED(0.834447) H4ED(0.837331) H4EE(0.867306) H4EF(0.83176) H2SV(1.088002)
 H2SW(1.05481) H2SX(1.084156) H2SY(0.640092) H(0.666144) HA(0.679212)
 H2EE(0.54566) H2EF(0.566934) H3EE(0.498835) H3EF(0.485266) H1EG(0.592251)
 H1EH(0.568384) H1EI(0.594537) H4EG(0.506115) H4EH(0.538573) H4EI(0.503978)
 H5F(0.637319) H2TM(0.804358) H2TN(0.802693) H2TO(0.809038) H2TP(0.769638)
 H2TQ(0.799345) H2TR(0.795123) H2TS(0.915209) H2TT(0.931667) H2TU(0.950713)
 H2TV(0.561668) H2TW(0.556547) H2TX(0.52523) H2TY(0.559674) HB(0.529354)
 HC(0.542639)
;
_atom_sites_solution_hydrogens     geom
_atom_sites_solution_primary       ?
_atom_sites_solution_secondary     ?
loop_
  _atom_site_label
  _atom_site_type_symbol
  _atom_site_fract_x
  _atom_site_fract_y
  _atom_site_fract_z
  _atom_site_U_iso_or_equiv
  _atom_site_adp_type
  _atom_site_occupancy
  _atom_site_site_symmetry_order
  _atom_site_calc_flag
  _atom_site_refinement_flags_posn
  _atom_site_refinement_flags_adp
  _atom_site_refinement_flags_occupancy
  _atom_site_disorder_assembly
  _atom_site_disorder_group
 Cu2 Cu -0.08770(2) 1.46015(2) 0.85300(2) 0.03049(8) Uani 1 1 d . . . . .
 Cu5 Cu 0.26031(2) 1.89768(2) 1.00779(2) 0.02993(8) Uani 1 1 d . . . . .
 Cu6 Cu 0.40997(2) 1.53148(2) 0.81475(2) 0.03003(8) Uani 1 1 d . . . . .
 Cu4 Cu 0.74476(2) 1.54371(2) 0.48010(2) 0.03444(9) Uani 1 1 d . . . . .
 Cu3 Cu 0.60242(2) 1.89610(2) 0.68701(2) 0.03593(9) Uani 1 1 d . . . . .
 Cu1 Cu 0.02972(2) 1.08996(2) 0.64842(2) 0.03659(9) Uani 1 1 d . . . . .
 O1I O 0.14743(9) 1.72707(9) 0.83965(5) 0.0320(4) Uani 1 1 d . . . . .
 O1G O 0.48789(11) 1.86894(10) 0.89696(5) 0.0400(5) Uani 1 1 d . . . . .
 O1H O 0.34048(11) 1.56886(10) 0.97694(5) 0.0390(5) Uani 1 1 d . . . . .
 O1B O -0.03125(11) 1.43569(10) 0.68702(5) 0.0399(5) Uani 1 1 d . . . . .
 O1E O 0.66143(12) 1.54992(10) 0.64154(5) 0.0442(5) Uani 1 1 d . . . . .
 O1A O -0.20968(12) 1.14870(12) 0.75389(6) 0.0535(6) Uani 1 1 d . . . . .
 O1D O 0.84682(12) 1.86313(12) 0.57880(6) 0.0522(6) Uani 1 1 d . . . . .
 N5B N -0.14025(12) 1.44670(11) 0.80496(6) 0.0310(5) Uani 1 1 d . . . . .
 O1C O 0.15708(11) 1.27741(12) 0.79802(6) 0.0495(6) Uani 1 1 d . . . . .
 N5H N 0.46318(11) 1.54890(11) 0.86357(6) 0.0297(5) Uani 1 1 d . . . . .
 N4H N 0.22107(11) 1.79915(11) 1.00694(6) 0.0300(5) Uani 1 1 d . . . . .
 N6H N 0.50599(12) 1.53665(11) 0.80601(6) 0.0324(5) Uani 1 1 d . . . . .
 N4G N 0.36135(11) 1.88289(11) 1.00939(6) 0.0310(5) Uani 1 1 d . . . . .
 N3H N 0.16653(12) 1.91199(11) 1.01560(6) 0.0316(5) Uani 1 1 d . . . . .
 N7A N 0.01678(12) 1.44170(12) 0.94969(6) 0.0328(5) Uani 1 1 d . . . . .
 N7D N 0.65419(13) 1.56524(12) 0.38118(6) 0.0358(5) Uani 1 1 d . . . . .
 N6A N -0.04520(11) 1.44092(11) 0.89933(6) 0.0316(5) Uani 1 1 d . . . . .
 N6G N 0.36347(12) 1.54064(11) 0.76612(6) 0.0324(5) Uani 1 1 d . . . . .
 N5E N 0.78972(12) 1.55226(12) 0.52934(6) 0.0335(5) Uani 1 1 d . . . . .
 N2H N 0.06941(12) 1.93440(12) 1.03069(6) 0.0338(5) Uani 1 1 d . . . . .
 N6B N -0.18356(12) 1.45512(11) 0.86278(6) 0.0318(5) Uani 1 1 d . . . . .
 N7H N 0.60797(12) 1.54395(12) 0.79219(6) 0.0330(5) Uani 1 1 d . . . . .
 N6D N 0.70839(12) 1.56464(12) 0.43321(6) 0.0353(5) Uani 1 1 d . . . . .
 N3I N 0.28648(11) 1.99459(11) 1.00164(6) 0.0310(5) Uani 1 1 d . . . . .
 N7I N 0.36524(12) 1.31316(12) 0.80733(6) 0.0355(5) Uani 1 1 d . . . . .
 N2G N 0.35184(12) 1.91011(12) 1.11881(6) 0.0343(5) Uani 1 1 d . . . . .
 N2D N 0.67928(12) 1.91155(12) 0.79160(6) 0.0353(5) Uani 1 1 d . . . . .
 N2I N 0.33558(12) 2.09572(11) 1.00311(6) 0.0336(5) Uani 1 1 d . . . . .
 N7G N 0.29848(12) 1.53451(11) 0.71626(6) 0.0330(5) Uani 1 1 d . . . . .
 N7E N 0.94866(12) 1.55785(12) 0.46514(6) 0.0349(5) Uani 1 1 d . . . . .
 N6E N 0.84294(12) 1.55064(12) 0.47412(6) 0.0340(5) Uani 1 1 d . . . . .
 N3E N 0.50557(12) 1.89880(12) 0.69441(6) 0.0346(5) Uani 1 1 d . . . . .
 N7B N -0.28619(12) 1.44798(12) 0.87636(6) 0.0327(5) Uani 1 1 d . . . . .
 N5I N 0.31283(11) 1.52066(11) 0.82613(6) 0.0310(5) Uani 1 1 d . . . . .
 N4I N 0.24013(11) 1.91031(11) 0.94576(6) 0.0305(5) Uani 1 1 d . . . . .
 N6I N 0.39194(12) 1.42118(12) 0.81318(6) 0.0343(5) Uani 1 1 d . . . . .
 N7C N -0.05352(12) 1.67992(12) 0.86141(6) 0.0359(5) Uani 1 1 d . . . . .
 N5C N 0.00654(12) 1.47684(12) 0.83868(6) 0.0334(5) Uani 1 1 d . . . . .
 N2C N -0.01386(14) 0.87103(12) 0.66617(6) 0.0391(6) Uani 1 1 d . . . . .
 N2E N 0.40294(12) 1.91854(12) 0.70381(6) 0.0346(5) Uani 1 1 d . . . . .
 N3D N 0.63994(12) 1.89957(12) 0.73740(6) 0.0362(5) Uani 1 1 d . . . . .
 N3A N -0.00062(13) 1.08982(12) 0.59870(6) 0.0374(5) Uani 1 1 d . . . . .
 N2A N -0.02758(13) 1.08556(12) 0.54386(6) 0.0389(5) Uani 1 1 d . . . . .
 O1F O 0.49080(12) 1.72167(13) 0.52924(7) 0.0572(7) Uani 1 1 d . . . . .
 N4E N 0.55755(13) 1.77993(12) 0.68312(6) 0.0362(5) Uani 1 1 d . . . . .
 N3G N 0.30219(12) 1.90034(12) 1.06560(6) 0.0333(5) Uani 1 1 d . . . . .
 N7F N 0.71740(13) 1.32324(13) 0.47188(7) 0.0406(6) Uani 1 1 d . . . . .
 N3B N 0.12884(13) 1.08280(12) 0.64397(6) 0.0362(5) Uani 1 1 d . . . . .
 N2B N 0.23265(13) 1.06059(12) 0.63703(6) 0.0382(5) Uani 1 1 d . . . . .
 N4D N 0.70450(13) 1.88893(13) 0.68537(6) 0.0399(6) Uani 1 1 d . . . . .
 N4F N 0.57919(12) 1.90506(12) 0.63593(6) 0.0375(5) Uani 1 1 d . . . . .
 N5F N 0.64887(12) 1.52438(13) 0.49162(6) 0.0369(5) Uani 1 1 d . . . . .
 N5G N 0.41090(12) 1.65457(12) 0.80646(6) 0.0336(5) Uani 1 1 d . . . . .
 N6C N -0.07236(12) 1.57114(12) 0.85834(6) 0.0350(5) Uani 1 1 d . . . . .
 N8G N 0.17715(13) 1.46118(13) 0.62589(6) 0.0400(6) Uani 1 1 d . . . . .
 N5A N -0.10130(12) 1.33353(12) 0.85751(6) 0.0353(5) Uani 1 1 d . . . . .
 N4C N 0.04980(13) 1.08307(12) 0.69919(6) 0.0379(5) Uani 1 1 d . . . . .
 N3C N 0.01131(13) 0.97443(12) 0.65390(6) 0.0370(5) Uani 1 1 d . . . . .
 N4B N 0.07867(14) 1.20345(12) 0.65311(6) 0.0393(6) Uani 1 1 d . . . . .
 N4A N -0.07397(13) 1.10294(13) 0.64655(7) 0.0409(6) Uani 1 1 d . . . . .
 N6F N 0.73179(12) 1.43236(13) 0.47330(6) 0.0377(5) Uani 1 1 d . . . . .
 N8D N 0.52294(14) 1.50172(14) 0.29213(6) 0.0444(6) Uani 1 1 d . . . . .
 N3F N 0.61860(13) 2.01264(13) 0.68265(6) 0.0405(6) Uani 1 1 d . . . . .
 N5D N 0.76065(13) 1.67073(13) 0.47656(6) 0.0387(6) Uani 1 1 d . . . . .
 N1E N 0.23348(14) 2.02141(13) 0.71786(7) 0.0453(6) Uani 1 1 d . . . . .
 N8A N 0.15128(14) 1.50974(15) 1.03730(6) 0.0461(6) Uani 1 1 d . . . . .
 C23H C 0.55371(14) 1.55528(13) 0.83443(7) 0.0308(5) Uani 1 1 d . . . . .
 N2F N 0.63164(15) 2.11866(13) 0.67149(7) 0.0467(6) Uani 1 1 d . . . . .
 C13I C 0.16937(14) 1.77519(13) 0.86553(7) 0.0304(5) Uani 1 1 d . . . . .
 N1D N 0.68526(15) 1.93446(13) 0.89582(6) 0.0423(6) Uani 1 1 d . . . . .
 C23E C 0.88678(14) 1.56055(14) 0.50450(7) 0.0326(6) Uani 1 1 d . . . . .
 C10H C 0.25135(14) 1.73967(13) 0.99925(7) 0.0307(5) Uani 1 1 d . . . . .
 C22H C 0.52768(14) 1.56183(13) 0.86518(7) 0.0307(5) Uani 1 1 d . . . . .
 H22H H 0.556668 1.575059 0.885688 0.037 Uiso 1 1 calc R U . . .
 C8H C 0.12831(14) 1.85332(14) 1.01823(7) 0.0337(6) Uani 1 1 d . . . . .
 C23B C -0.23157(14) 1.44027(13) 0.83392(7) 0.0307(5) Uani 1 1 d . . . . .
 N1B N 0.39880(15) 0.95477(15) 0.62011(8) 0.0515(7) Uani 1 1 d . . . . .
 C22E C 0.85523(14) 1.56228(14) 0.53394(7) 0.0334(6) Uani 1 1 d . . . . .
 H22E H 0.881403 1.570401 0.555681 0.040 Uiso 1 1 calc R U . . .
 C11G C 0.37817(14) 1.82302(14) 0.95877(7) 0.0339(6) Uani 1 1 d . . . . .
 H11G H 0.346299 1.788615 0.963106 0.041 Uiso 1 1 calc R U . . .
 C9G C 0.40090(14) 1.89205(14) 1.03782(7) 0.0329(6) Uani 1 1 d . . . . .
 H9G H 0.448941 1.893167 1.039031 0.039 Uiso 1 1 calc R U . . .
 C21G C 0.51630(15) 1.77440(14) 0.86788(7) 0.0352(6) Uani 1 1 d . . . . .
 H21G H 0.561753 1.781124 0.879645 0.042 Uiso 1 1 calc R U . . .
 C10G C 0.39320(13) 1.87847(14) 0.98017(7) 0.0313(6) Uani 1 1 d . . . . .
 C19H C 0.43427(13) 1.55538(13) 0.89342(6) 0.0295(5) Uani 1 1 d . . . . .
 C23C C -0.01031(14) 1.58861(14) 0.84863(7) 0.0345(6) Uani 1 1 d . . . . .
 C8G C 0.37227(14) 1.90061(14) 1.06786(7) 0.0341(6) Uani 1 1 d . . . . .
 C16G C 0.46836(15) 1.81748(14) 0.87297(7) 0.0354(6) Uani 1 1 d . . . . .
 C16H C 0.37127(14) 1.56720(14) 0.94867(7) 0.0328(6) Uani 1 1 d . . . . .
 C24G C 0.31099(15) 1.60092(14) 0.72535(7) 0.0363(6) Uani 1 1 d . . . . .
 H24G H 0.295058 1.636989 0.712714 0.044 Uiso 1 1 calc R U . . .
 C15I C 0.16309(14) 1.81949(14) 0.92005(7) 0.0328(6) Uani 1 1 d . . . . .
 H15I H 0.142782 1.819041 0.939645 0.039 Uiso 1 1 calc R U . . .
 N1H N -0.08381(14) 2.04209(15) 1.06165(7) 0.0496(7) Uani 1 1 d . . . . .
 C22B C -0.20503(14) 1.43490(14) 0.80305(7) 0.0326(6) Uani 1 1 d . . . . .
 H22B H -0.233977 1.423226 0.782330 0.039 Uiso 1 1 calc R U . . .
 C17H C 0.41171(15) 1.62045(14) 0.94043(7) 0.0347(6) Uani 1 1 d . . . . .
 H17H H 0.417440 1.660744 0.953450 0.042 Uiso 1 1 calc R U . . .
 C23I C 0.32405(14) 1.40720(14) 0.81608(7) 0.0338(6) Uani 1 1 d . . . . .
 C16I C 0.19007(13) 1.67660(13) 0.83762(7) 0.0299(5) Uani 1 1 d . . . . .
 N8E N 1.11507(16) 1.56172(17) 0.41331(8) 0.0572(8) Uani 1 1 d . . . . .
 N8B N -0.43873(15) 1.45211(16) 0.93666(7) 0.0519(7) Uani 1 1 d . . . . .
 C23G C 0.35093(15) 1.60407(14) 0.75621(7) 0.0344(6) Uani 1 1 d . . . . .
 C9H C 0.15897(14) 1.79339(14) 1.01213(7) 0.0330(6) Uani 1 1 d . . . . .
 H9H H 0.134581 1.751368 1.011941 0.040 Uiso 1 1 calc R U . . .
 C21B C -0.05379(14) 1.49508(14) 0.73445(7) 0.0346(6) Uani 1 1 d . . . . .
 H21B H -0.033803 1.533884 0.726291 0.041 Uiso 1 1 calc R U . . .
 C18H C 0.44394(14) 1.61383(14) 0.91261(7) 0.0330(6) Uani 1 1 d . . . . .
 H18H H 0.472604 1.649590 0.906832 0.040 Uiso 1 1 calc R U . . .
 N1A N -0.00268(18) 1.07379(14) 0.44233(7) 0.0525(7) Uani 1 1 d . . . . .
 C8I C 0.28746(14) 2.01392(14) 0.96911(7) 0.0331(6) Uani 1 1 d . . . . .
 N8I N 0.39216(19) 1.11116(14) 0.79337(8) 0.0580(8) Uani 1 1 d . . . . .
 C25G C 0.33119(14) 1.50041(14) 0.74165(7) 0.0324(6) Uani 1 1 d . . . . .
 H25G H 0.330776 1.453611 0.741696 0.039 Uiso 1 1 calc R U . . .
 C24H C 0.61717(14) 1.56074(14) 0.82613(7) 0.0330(6) Uani 1 1 d . . . . .
 H24H H 0.659019 1.573398 0.840560 0.040 Uiso 1 1 calc R U . . .
 C11I C 0.24427(15) 1.86881(14) 0.88826(7) 0.0351(6) Uani 1 1 d . . . . .
 H11I H 0.279739 1.901577 0.886291 0.042 Uiso 1 1 calc R U . . .
 C23A C -0.04378(14) 1.37629(14) 0.90991(7) 0.0335(6) Uani 1 1 d . . . . .
 C20I C 0.21576(15) 1.58372(14) 0.80536(7) 0.0344(6) Uani 1 1 d . . . . .
 H20I H 0.205721 1.555165 0.785900 0.041 Uiso 1 1 calc R U . . .
 C24A C -0.00619(15) 1.37650(14) 0.94098(7) 0.0352(6) Uani 1 1 d . . . . .
 H24A H 0.002679 1.339259 0.954190 0.042 Uiso 1 1 calc R U . . .
 C28A C 0.06252(14) 1.46531(15) 0.97935(7) 0.0350(6) Uani 1 1 d . . . . .
 C24E C 0.95249(15) 1.56556(14) 0.49922(7) 0.0334(6) Uani 1 1 d . . . . .
 H24E H 0.992554 1.572838 0.515606 0.040 Uiso 1 1 calc R U . . .
 C22C C 0.02965(14) 1.53770(14) 0.83891(7) 0.0342(6) Uani 1 1 d . . . . .
 H22C H 0.072784 1.548878 0.832685 0.041 Uiso 1 1 calc R U . . .
 C16B C -0.05615(15) 1.43490(15) 0.71713(7) 0.0359(6) Uani 1 1 d . . . . .
 N8H N 0.75890(16) 1.53362(16) 0.73136(7) 0.0535(7) Uani 1 1 d . . . . .
 C28D C 0.61056(14) 1.54310(15) 0.35091(7) 0.0350(6) Uani 1 1 d . . . . .
 C21H C 0.36265(14) 1.50795(14) 0.92993(7) 0.0325(6) Uani 1 1 d . . . . .
 H21H H 0.335627 1.471539 0.936284 0.039 Uiso 1 1 calc R U . . .
 C20B C -0.08075(14) 1.49830(14) 0.76374(7) 0.0332(6) Uani 1 1 d . . . . .
 H20B H -0.078315 1.539118 0.776106 0.040 Uiso 1 1 calc R U . . .
 C8E C 0.46623(15) 1.83956(14) 0.69353(7) 0.0364(6) Uani 1 1 d . . . . .
 C8C C 0.02483(17) 0.96826(15) 0.68824(7) 0.0399(7) Uani 1 1 d . . . . .
 C25B C -0.21729(14) 1.45944(14) 0.88759(7) 0.0324(6) Uani 1 1 d . . . . .
 H25B H -0.197036 1.469163 0.910279 0.039 Uiso 1 1 calc R U . . .
 C28G C 0.25761(14) 1.50871(14) 0.68574(7) 0.0336(6) Uani 1 1 d . . . . .
 C6I C 0.31506(14) 2.04511(14) 1.02153(7) 0.0331(6) Uani 1 1 d . . . . .
 H6I H 0.320586 2.046155 1.045275 0.040 Uiso 1 1 calc R U . . .
 C15H C 0.31330(14) 1.72616(14) 1.01796(7) 0.0328(6) Uani 1 1 d . . . . .
 H15H H 0.335095 1.755744 1.035758 0.039 Uiso 1 1 calc R U . . .
 C19A C -0.12776(16) 1.28182(14) 0.83340(7) 0.0370(6) Uani 1 1 d . . . . .
 C14G C 0.46820(14) 1.92591(14) 0.94520(7) 0.0345(6) Uani 1 1 d . . . . .
 H14G H 0.498420 1.961226 0.940276 0.041 Uiso 1 1 calc R U . . .
 C24C C 0.00197(15) 1.65562(14) 0.85042(7) 0.0363(6) Uani 1 1 d . . . . .
 H24C H 0.040771 1.680456 0.845180 0.044 Uiso 1 1 calc R U . . .
 C21E C 0.69625(15) 1.49508(15) 0.59617(7) 0.0360(6) Uani 1 1 d . . . . .
 H21E H 0.678061 1.454772 0.603686 0.043 Uiso 1 1 calc R U . . .
 C10I C 0.21600(14) 1.86660(13) 0.91742(7) 0.0307(5) Uani 1 1 d . . . . .
 C14I C 0.13995(14) 1.77306(14) 0.89401(7) 0.0329(6) Uani 1 1 d . . . . .
 H14I H 0.104351 1.740306 0.895801 0.039 Uiso 1 1 calc R U . . .
 C6D C 0.62242(15) 1.90464(14) 0.76702(7) 0.0346(6) Uani 1 1 d . . . . .
 H6D H 0.576764 1.903691 0.770995 0.042 Uiso 1 1 calc R U . . .
 N8C N -0.09371(18) 1.87904(14) 0.87495(8) 0.0589(8) Uani 1 1 d . . . . .
 C3G C 0.35928(17) 1.91713(14) 1.15448(7) 0.0379(6) Uani 1 1 d . . . . .
 C19G C 0.43055(15) 1.71208(14) 0.82774(7) 0.0335(6) Uani 1 1 d . . . . .
 C7I C 0.31771(15) 2.07614(14) 0.96976(7) 0.0342(6) Uani 1 1 d . . . . .
 H7I H 0.325066 2.101104 0.951056 0.041 Uiso 1 1 calc R U . . .
 C25D C 0.67464(14) 1.52770(15) 0.40792(7) 0.0341(6) Uani 1 1 d . . . . .
 H25D H 0.665605 1.481144 0.408131 0.041 Uiso 1 1 calc R U . . .
 C16A C -0.17999(16) 1.19344(16) 0.77998(8) 0.0431(7) Uani 1 1 d . . . . .
 C3H C 0.01762(14) 1.97179(15) 1.04085(7) 0.0354(6) Uani 1 1 d . . . . .
 C6B C 0.16724(15) 1.03544(14) 0.63808(7) 0.0361(6) Uani 1 1 d . . . . .
 H6B H 0.151860 0.989942 0.634971 0.043 Uiso 1 1 calc R U . . .
 C24B C -0.29517(14) 1.43534(14) 0.84212(7) 0.0334(6) Uani 1 1 d . . . . .
 H24B H -0.337150 1.425268 0.827357 0.040 Uiso 1 1 calc R U . . .
 C19B C -0.11134(14) 1.44157(14) 0.77492(7) 0.0318(6) Uani 1 1 d . . . . .
 C20H C 0.39354(13) 1.50213(13) 0.90198(7) 0.0312(6) Uani 1 1 d . . . . .
 H20H H 0.386994 1.462087 0.888726 0.037 Uiso 1 1 calc R U . . .
 C6H C 0.13070(14) 1.95981(14) 1.02327(7) 0.0329(6) Uani 1 1 d . . . . .
 H6H H 0.144975 2.005539 1.023672 0.040 Uiso 1 1 calc R U . . .
 C27G C 0.24340(15) 1.54993(15) 0.65944(7) 0.0368(6) Uani 1 1 d . . . . .
 H27G H 0.261145 1.594846 0.661312 0.044 Uiso 1 1 calc R U . . .
 C21A C -0.22293(16) 1.23305(15) 0.79293(8) 0.0407(7) Uani 1 1 d . . . . .
 H21A H -0.270242 1.229976 0.783986 0.049 Uiso 1 1 calc R U . . .
 C15G C 0.43766(14) 1.93015(14) 0.97326(7) 0.0342(6) Uani 1 1 d . . . . .
 H15G H 0.447040 1.968394 0.987834 0.041 Uiso 1 1 calc R U . . .
 C3E C 0.34649(15) 1.95344(14) 0.70950(7) 0.0349(6) Uani 1 1 d . . . . .
 C10E C 0.58267(15) 1.72016(14) 0.67283(7) 0.0357(6) Uani 1 1 d . . . . .
 C12I C 0.22047(15) 1.82298(14) 0.86206(7) 0.0355(6) Uani 1 1 d . . . . .
 H12I H 0.239106 1.824468 0.841982 0.043 Uiso 1 1 calc R U . . .
 N1G N 0.37154(18) 1.93492(14) 1.22371(7) 0.0532(7) Uani 1 1 d . . . . .
 C11H C 0.21920(15) 1.69688(14) 0.97301(7) 0.0367(6) Uani 1 1 d . . . . .
 H11H H 0.176463 1.706079 0.960567 0.044 Uiso 1 1 calc R U . . .
 C25A C -0.00849(14) 1.47875(14) 0.92366(7) 0.0324(6) Uani 1 1 d . . . . .
 H25A H -0.000681 1.525393 0.923155 0.039 Uiso 1 1 calc R U . . .
 C20D C 0.84720(16) 1.72413(15) 0.51952(7) 0.0395(6) Uani 1 1 d . . . . .
 H20D H 0.877645 1.692921 0.514495 0.047 Uiso 1 1 calc R U . . .
 C10B C 0.05288(16) 1.26388(14) 0.66145(8) 0.0383(6) Uani 1 1 d . . . . .
 C22I C 0.28426(14) 1.46134(14) 0.82255(7) 0.0336(6) Uani 1 1 d . . . . .
 H22I H 0.237423 1.453230 0.824157 0.040 Uiso 1 1 calc R U . . .
 C25H C 0.53988(14) 1.53007(14) 0.78120(7) 0.0335(6) Uani 1 1 d . . . . .
 H25H H 0.519851 1.517445 0.758779 0.040 Uiso 1 1 calc R U . . .
 C2I C 0.35818(15) 2.19097(14) 1.04276(7) 0.0368(6) Uani 1 1 d . . . . .
 H2I H 0.323368 2.174682 1.054475 0.044 Uiso 1 1 calc R U . . .
 C13D C 0.80762(16) 1.86768(17) 0.60413(8) 0.0434(7) Uani 1 1 d . . . . .
 C25I C 0.41469(15) 1.36366(14) 0.80773(7) 0.0363(6) Uani 1 1 d . . . . .
 H25I H 0.459953 1.357751 0.804453 0.044 Uiso 1 1 calc R U . . .
 C6E C 0.46649(15) 1.94537(14) 0.70057(7) 0.0349(6) Uani 1 1 d . . . . .
 H6E H 0.480329 1.991283 0.702509 0.042 Uiso 1 1 calc R U . . .
 C7H C 0.06801(15) 1.86656(14) 1.02741(8) 0.0366(6) Uani 1 1 d . . . . .
 H7H H 0.032204 1.835391 1.030871 0.044 Uiso 1 1 calc R U . . .
 C20A C -0.19630(16) 1.27780(14) 0.81934(7) 0.0378(6) Uani 1 1 d . . . . .
 H20A H -0.225691 1.306182 0.827908 0.045 Uiso 1 1 calc R U . . .
 C22G C 0.37560(15) 1.66153(14) 0.77763(7) 0.0363(6) Uani 1 1 d . . . . .
 H22G H 0.365707 1.704349 0.770378 0.044 Uiso 1 1 calc R U . . .
 C20G C 0.49692(15) 1.72080(14) 0.84516(7) 0.0344(6) Uani 1 1 d . . . . .
 H20G H 0.529100 1.690250 0.841584 0.041 Uiso 1 1 calc R U . . .
 C6G C 0.29153(15) 1.90608(14) 1.09640(7) 0.0348(6) Uani 1 1 d . . . . .
 H6G H 0.247741 1.907333 1.102583 0.042 Uiso 1 1 calc R U . . .
 C9I C 0.26006(14) 1.96948(14) 0.94078(7) 0.0330(6) Uani 1 1 d . . . . .
 H9I H 0.256975 1.984414 0.918634 0.040 Uiso 1 1 calc R U . . .
 C21D C 0.86786(17) 1.77109(16) 0.54570(7) 0.0418(7) Uani 1 1 d . . . . .
 H21D H 0.912520 1.772369 0.558387 0.050 Uiso 1 1 calc R U . . .
 C16E C 0.69082(16) 1.55440(15) 0.61291(7) 0.0373(6) Uani 1 1 d . . . . .
 C3D C 0.68118(15) 1.91831(14) 0.82702(7) 0.0350(6) Uani 1 1 d . . . . .
 C22A C -0.07476(15) 1.32125(14) 0.88709(7) 0.0353(6) Uani 1 1 d . . . . .
 H22A H -0.075010 1.277147 0.894271 0.042 Uiso 1 1 calc R U . . .
 C13G C 0.45427(14) 1.86929(14) 0.92417(7) 0.0332(6) Uani 1 1 d . . . . .
 C8B C 0.17060(16) 1.14103(15) 0.64706(8) 0.0398(7) Uani 1 1 d . . . . .
 C10C C 0.07505(16) 1.13652(15) 0.72350(7) 0.0388(6) Uani 1 1 d . . . . .
 C19I C 0.27041(13) 1.57351(13) 0.83009(7) 0.0305(5) Uani 1 1 d . . . . .
 C28I C 0.37349(16) 1.24478(14) 0.80243(8) 0.0392(7) Uani 1 1 d . . . . .
 C17B C -0.08507(17) 1.37790(15) 0.72866(8) 0.0409(7) Uani 1 1 d . . . . .
 H17B H -0.085806 1.336778 0.716768 0.049 Uiso 1 1 calc R U . . .
 C17G C 0.40304(15) 1.81084(14) 0.85487(7) 0.0372(6) Uani 1 1 d . . . . .
 H17G H 0.371533 1.842364 0.857998 0.045 Uiso 1 1 calc R U . . .
 C23D C 0.71028(16) 1.62927(15) 0.42275(7) 0.0378(6) Uani 1 1 d . . . . .
 C24D C 0.67735(16) 1.63027(15) 0.39062(7) 0.0400(7) Uani 1 1 d . . . . .
 H24D H 0.671397 1.667830 0.377332 0.048 Uiso 1 1 calc R U . . .
 C25C C -0.09649(15) 1.62650(14) 0.86599(8) 0.0372(6) Uani 1 1 d . . . . .
 H25C H -0.138590 1.629386 0.873764 0.045 Uiso 1 1 calc R U . . .
 C19C C 0.04666(14) 1.42699(15) 0.82804(7) 0.0352(6) Uani 1 1 d . . . . .
 C9E C 0.49484(15) 1.77831(15) 0.68637(8) 0.0391(6) Uani 1 1 d . . . . .
 H9E H 0.467452 1.737618 0.684119 0.047 Uiso 1 1 calc R U . . .
 C22F C 0.62753(15) 1.46311(16) 0.49172(8) 0.0403(7) Uani 1 1 d . . . . .
 H22F H 0.584266 1.450861 0.497552 0.048 Uiso 1 1 calc R U . . .
 C19E C 0.75595(14) 1.55376(14) 0.55791(7) 0.0334(6) Uani 1 1 d . . . . .
 C3I C 0.37278(14) 2.15640(13) 1.01544(7) 0.0340(6) Uani 1 1 d . . . . .
 C4I C 0.42442(15) 2.18125(15) 0.99894(8) 0.0382(6) Uani 1 1 d . . . . .
 H4I H 0.434950 2.158331 0.979926 0.046 Uiso 1 1 calc R U . . .
 C12G C 0.41001(15) 1.81799(14) 0.93089(7) 0.0344(6) Uani 1 1 d . . . . .
 H12G H 0.401315 1.779393 0.916545 0.041 Uiso 1 1 calc R U . . .
 C13B C -0.00303(16) 1.37759(14) 0.67826(7) 0.0376(6) Uani 1 1 d . . . . .
 C21I C 0.17575(14) 1.63551(14) 0.80896(7) 0.0336(6) Uani 1 1 d . . . . .
 H21I H 0.138628 1.642881 0.791873 0.040 Uiso 1 1 calc R U . . .
 C12H C 0.24999(16) 1.64048(14) 0.96507(7) 0.0378(6) Uani 1 1 d . . . . .
 H12H H 0.228955 1.611340 0.946934 0.045 Uiso 1 1 calc R U . . .
 N8F N 0.76697(19) 1.12613(16) 0.46256(9) 0.0645(9) Uani 1 1 d . . . . .
 C10F C 0.55877(16) 1.85322(15) 0.61028(8) 0.0386(6) Uani 1 1 d . . . . .
 C14B C -0.03749(17) 1.33701(16) 0.65187(8) 0.0419(7) Uani 1 1 d . . . . .
 H14B H -0.079739 1.348234 0.639706 0.050 Uiso 1 1 calc R U . . .
 C16D C 0.82342(17) 1.81523(16) 0.55299(7) 0.0436(7) Uani 1 1 d . . . . .
 C13C C 0.12633(16) 1.23293(16) 0.77219(8) 0.0418(7) Uani 1 1 d . . . . .
 C23F C 0.67007(15) 1.41300(16) 0.48285(8) 0.0391(6) Uani 1 1 d . . . . .
 C14H C 0.34333(15) 1.66893(14) 1.01049(7) 0.0348(6) Uani 1 1 d . . . . .
 H14H H 0.385101 1.658511 1.023467 0.042 Uiso 1 1 calc R U . . .
 C7G C 0.40356(15) 1.90671(14) 1.10050(7) 0.0351(6) Uani 1 1 d . . . . .
 H7G H 0.451103 1.908277 1.108793 0.042 Uiso 1 1 calc R U . . .
 C14A C -0.15066(16) 1.07669(17) 0.72303(8) 0.0435(7) Uani 1 1 d . . . . .
 H14A H -0.156891 1.042974 0.738239 0.052 Uiso 1 1 calc R U . . .
 C18G C 0.38377(15) 1.75801(14) 0.83214(7) 0.0362(6) Uani 1 1 d . . . . .
 H18G H 0.338910 1.753006 0.819592 0.043 Uiso 1 1 calc R U . . .
 C13E C 0.63502(17) 1.60729(15) 0.65222(8) 0.0397(7) Uani 1 1 d . . . . .
 C20C C 0.05826(15) 1.37299(15) 0.84759(8) 0.0403(7) Uani 1 1 d . . . . .
 H20C H 0.041074 1.370217 0.868039 0.048 Uiso 1 1 calc R U . . .
 C7E C 0.40302(15) 1.85091(14) 0.69923(8) 0.0379(6) Uani 1 1 d . . . . .
 H7E H 0.366182 1.818846 0.699935 0.046 Uiso 1 1 calc R U . . .
 C19D C 0.78240(16) 1.72296(15) 0.50085(7) 0.0384(6) Uani 1 1 d . . . . .
 N1C N -0.09024(19) 0.67119(16) 0.65533(9) 0.0643(9) Uani 1 1 d . . . . .
 C24I C 0.30731(15) 1.34092(14) 0.81237(8) 0.0378(6) Uani 1 1 d . . . . .
 H24I H 0.264109 1.318523 0.813139 0.045 Uiso 1 1 calc R U . . .
 C6A C 0.02365(16) 1.08523(14) 0.57090(7) 0.0368(6) Uani 1 1 d . . . . .
 H6A H 0.070401 1.082087 0.569557 0.044 Uiso 1 1 calc R U . . .
 C3B C 0.28842(16) 1.02472(15) 0.63083(7) 0.0384(6) Uani 1 1 d . . . . .
 C28B C -0.33803(15) 1.44933(15) 0.89654(7) 0.0359(6) Uani 1 1 d . . . . .
 C28H C 0.65980(15) 1.54044(15) 0.77188(7) 0.0373(6) Uani 1 1 d . . . . .
 C19F C 0.60747(15) 1.57380(16) 0.50157(8) 0.0406(7) Uani 1 1 d . . . . .
 C13H C 0.31139(15) 1.62752(14) 0.98390(7) 0.0348(6) Uani 1 1 d . . . . .
 C4H C -0.04408(16) 1.93937(16) 1.04441(8) 0.0427(7) Uani 1 1 d . . . . .
 H4H H -0.053018 1.893139 1.039771 0.051 Uiso 1 1 calc R U . . .
 C14E C 0.67273(16) 1.64652(16) 0.67837(8) 0.0408(7) Uani 1 1 d . . . . .
 H14E H 0.715893 1.634618 0.689140 0.049 Uiso 1 1 calc R U . . .
 C8D C 0.71053(16) 1.90377(17) 0.74288(8) 0.0422(7) Uani 1 1 d . . . . .
 C8F C 0.60389(18) 2.02011(16) 0.64824(8) 0.0451(7) Uani 1 1 d . . . . .
 C18I C 0.28504(15) 1.61540(15) 0.85842(8) 0.0395(7) Uani 1 1 d . . . . .
 H18I H 0.323124 1.609033 0.875155 0.047 Uiso 1 1 calc R U . . .
 C12E C 0.57196(17) 1.62284(15) 0.63665(8) 0.0430(7) Uani 1 1 d . . . . .
 H12E H 0.546830 1.594904 0.618955 0.052 Uiso 1 1 calc R U . . .
 C11B C 0.08670(16) 1.30573(15) 0.68780(8) 0.0403(7) Uani 1 1 d . . . . .
 H11B H 0.128927 1.294935 0.700173 0.048 Uiso 1 1 calc R U . . .
 C20E C 0.72842(14) 1.49494(15) 0.56835(7) 0.0356(6) Uani 1 1 d . . . . .
 H20E H 0.731564 1.454560 0.556487 0.043 Uiso 1 1 calc R U . . .
 C37 C 0.39621(16) 2.25060(15) 1.05261(8) 0.0412(7) Uani 1 1 d . . . . .
 H37 H 0.385526 2.275203 1.071074 0.049 Uiso 1 1 calc R U . . .
 C22D C 0.73809(16) 1.68381(15) 0.44640(8) 0.0408(7) Uani 1 1 d . . . . .
 H22D H 0.739374 1.728096 0.439467 0.049 Uiso 1 1 calc R U . . .
 C18B C -0.11306(16) 1.38132(14) 0.75783(7) 0.0379(6) Uani 1 1 d . . . . .
 H18B H -0.133212 1.342564 0.765959 0.045 Uiso 1 1 calc R U . . .
 C4D C 0.74299(16) 1.93006(15) 0.84852(8) 0.0403(7) Uani 1 1 d . . . . .
 H4D H 0.784826 1.932990 0.840170 0.048 Uiso 1 1 calc R U . . .
 C25E C 0.88144(15) 1.54907(15) 0.45103(7) 0.0363(6) Uani 1 1 d . . . . .
 H25E H 0.864943 1.542710 0.427707 0.044 Uiso 1 1 calc R U . . .
 C10D C 0.73898(15) 1.88165(17) 0.65700(7) 0.0405(7) Uani 1 1 d . . . . .
 C28C C -0.06536(16) 1.74744(15) 0.86675(8) 0.0408(7) Uani 1 1 d . . . . .
 C25F C 0.75845(16) 1.37772(15) 0.46663(7) 0.0384(6) Uani 1 1 d . . . . .
 H25F H 0.800915 1.375948 0.459095 0.046 Uiso 1 1 calc R U . . .
 C18C C 0.07298(15) 1.43235(17) 0.79826(8) 0.0413(7) Uani 1 1 d . . . . .
 H18C H 0.065781 1.469740 0.784958 0.050 Uiso 1 1 calc R U . . .
 C11E C 0.54526(16) 1.67954(15) 0.64692(8) 0.0410(7) Uani 1 1 d . . . . .
 H11E H 0.501645 1.690655 0.636339 0.049 Uiso 1 1 calc R U . . .
 C30G C 0.19245(16) 1.42217(15) 0.65159(7) 0.0406(7) Uani 1 1 d . . . . .
 H30G H 0.175315 1.377102 0.648785 0.049 Uiso 1 1 calc R U . . .
 C27D C 0.59287(17) 1.58714(17) 0.32651(8) 0.0443(7) Uani 1 1 d . . . . .
 H27D H 0.610410 1.632097 0.329302 0.053 Uiso 1 1 calc R U . . .
 C5D C 0.74202(17) 1.93738(15) 0.88242(8) 0.0418(7) Uani 1 1 d . . . . .
 H5D H 0.784461 1.944978 0.897092 0.050 Uiso 1 1 calc R U . . .
 C7B C 0.23471(17) 1.12777(15) 0.64282(8) 0.0420(7) Uani 1 1 d . . . . .
 H7B H 0.273104 1.158753 0.643687 0.050 Uiso 1 1 calc R U . . .
 C4E C 0.28244(16) 1.92040(15) 0.70673(8) 0.0412(7) Uani 1 1 d . . . . .
 H4E H 0.275859 1.874132 0.701797 0.049 Uiso 1 1 calc R U . . .
 C3A C -0.01966(17) 1.08168(14) 0.50928(7) 0.0393(7) Uani 1 1 d . . . . .
 C29G C 0.23186(16) 1.44327(15) 0.68219(7) 0.0385(6) Uani 1 1 d . . . . .
 H29G H 0.240721 1.413929 0.699933 0.046 Uiso 1 1 calc R U . . .
 C29D C 0.58531(17) 1.47767(16) 0.34560(8) 0.0426(7) Uani 1 1 d . . . . .
 H29D H 0.597216 1.446032 0.361923 0.051 Uiso 1 1 calc R U . . .
 C12B C 0.05850(17) 1.36317(15) 0.69590(8) 0.0416(7) Uani 1 1 d . . . . .
 H12B H 0.081678 1.392346 0.713557 0.050 Uiso 1 1 calc R U . . .
 C6C C -0.01124(15) 0.91552(14) 0.64129(7) 0.0364(6) Uani 1 1 d . . . . .
 H6C H -0.024148 0.904721 0.618035 0.044 Uiso 1 1 calc R U . . .
 C7C C 0.00941(18) 0.90500(15) 0.69603(8) 0.0442(7) Uani 1 1 d . . . . .
 H7C H 0.013867 0.887821 0.717761 0.053 Uiso 1 1 calc R U . . .
 C9D C 0.74331(16) 1.89720(18) 0.71382(8) 0.0451(7) Uani 1 1 d . . . . .
 H9D H 0.791541 1.898966 0.715812 0.054 Uiso 1 1 calc R U . . .
 C2D C 0.62170(17) 1.91430(16) 0.84020(8) 0.0420(7) Uani 1 1 d . . . . .
 H2D H 0.578574 1.905935 0.826167 0.050 Uiso 1 1 calc R U . . .
 C18E C 0.74912(17) 1.61291(15) 0.57427(8) 0.0410(7) Uani 1 1 d . . . . .
 H18E H 0.767172 1.653223 0.566698 0.049 Uiso 1 1 calc R U . . .
 C26G C 0.20279(16) 1.52424(16) 0.63039(7) 0.0402(7) Uani 1 1 d . . . . .
 H26G H 0.192371 1.552968 0.612503 0.048 Uiso 1 1 calc R U . . .
 C3C C -0.03931(17) 0.80297(15) 0.66217(8) 0.0420(7) Uani 1 1 d . . . . .
 C29E C 0.99704(17) 1.53161(18) 0.41540(8) 0.0458(7) Uani 1 1 d . . . . .
 H29E H 0.954414 1.511036 0.404599 0.055 Uiso 1 1 calc R U . . .
 C2E C 0.35380(16) 2.02089(15) 0.71703(8) 0.0404(7) Uani 1 1 d . . . . .
 H2E H 0.397145 2.044958 0.719571 0.048 Uiso 1 1 calc R U . . .
 C9B C 0.14312(17) 1.20307(15) 0.65320(8) 0.0422(7) Uani 1 1 d . . . . .
 H9B H 0.172014 1.242801 0.657235 0.051 Uiso 1 1 calc R U . . .
 C28E C 1.00499(15) 1.55934(15) 0.44750(7) 0.0371(6) Uani 1 1 d . . . . .
 C24F C 0.66060(16) 1.34578(16) 0.48221(8) 0.0439(7) Uani 1 1 d . . . . .
 H24F H 0.622713 1.319917 0.487750 0.053 Uiso 1 1 calc R U . . .
 C7D C 0.73527(16) 1.91100(18) 0.77595(8) 0.0449(7) Uani 1 1 d . . . . .
 H7D H 0.781835 1.914901 0.786286 0.054 Uiso 1 1 calc R U . . .
 C27B C -0.40205(16) 1.41724(15) 0.88558(8) 0.0408(7) Uani 1 1 d . . . . .
 H27B H -0.412729 1.393965 0.864467 0.049 Uiso 1 1 calc R U . . .
 C17I C 0.24440(15) 1.66643(15) 0.86243(7) 0.0379(6) Uani 1 1 d . . . . .
 H17I H 0.253779 1.694327 0.882132 0.045 Uiso 1 1 calc R U . . .
 C10A C -0.10969(16) 1.11485(16) 0.67382(8) 0.0415(7) Uani 1 1 d . . . . .
 C13A C -0.17379(16) 1.13904(17) 0.72761(8) 0.0459(8) Uani 1 1 d . . . . .
 C14C C 0.17021(16) 1.19495(16) 0.75885(8) 0.0425(7) Uani 1 1 d . . . . .
 H14C H 0.218013 1.202161 0.766256 0.051 Uiso 1 1 calc R U . . .
 C6F C 0.63509(16) 2.07211(16) 0.69564(8) 0.0426(7) Uani 1 1 d . . . . .
 H6F H 0.647960 2.082241 0.718955 0.051 Uiso 1 1 calc R U . . .
 C27H C 0.72042(16) 1.57923(16) 0.77986(9) 0.0436(7) Uani 1 1 d . . . . .
 H27H H 0.729475 1.608375 0.799109 0.052 Uiso 1 1 calc R U . . .
 C30D C 0.54229(17) 1.45975(17) 0.31588(8) 0.0459(7) Uani 1 1 d . . . . .
 H30D H 0.525443 1.414708 0.312121 0.055 Uiso 1 1 calc R U . . .
 C2H C 0.02840(17) 2.03895(16) 1.04740(9) 0.0455(7) Uani 1 1 d . . . . .
 H2H H 0.070527 2.062035 1.045239 0.055 Uiso 1 1 calc R U . . .
 C13F C 0.51670(16) 1.76219(17) 0.55769(9) 0.0470(8) Uani 1 1 d . . . . .
 C17E C 0.71573(18) 1.61351(15) 0.60192(8) 0.0427(7) Uani 1 1 d . . . . .
 H17E H 0.710230 1.654109 0.613015 0.051 Uiso 1 1 calc R U . . .
 C29C C -0.11203(17) 1.76436(16) 0.88683(8) 0.0436(7) Uani 1 1 d . . . . .
 H29C H -0.134662 1.731752 0.898295 0.052 Uiso 1 1 calc R U . . .
 C16C C 0.11897(15) 1.32728(16) 0.80754(8) 0.0420(7) Uani 1 1 d . . . . .
 C15A C -0.11837(16) 1.06480(16) 0.69583(8) 0.0421(7) Uani 1 1 d . . . . .
 H15A H -0.102302 1.022714 0.692288 0.050 Uiso 1 1 calc R U . . .
 C15C C 0.14458(16) 1.14630(16) 0.73466(8) 0.0432(7) Uani 1 1 d . . . . .
 H15C H 0.174734 1.119449 0.725651 0.052 Uiso 1 1 calc R U . . .
 C8A C -0.07027(16) 1.09353(16) 0.58973(8) 0.0427(7) Uani 1 1 d . . . . .
 C1D C 0.62686(18) 1.92287(16) 0.87463(8) 0.0456(7) Uani 1 1 d . . . . .
 H1D H 0.585821 1.920270 0.883675 0.055 Uiso 1 1 calc R U . . .
 C9A C -0.10783(17) 1.10201(17) 0.61664(8) 0.0455(7) Uani 1 1 d . . . . .
 H9A H -0.155489 1.106726 0.612533 0.055 Uiso 1 1 calc R U . . .
 C29B C -0.32517(17) 1.48333(18) 0.92730(8) 0.0472(8) Uani 1 1 d . . . . .
 H29B H -0.282154 1.506593 0.935212 0.057 Uiso 1 1 calc R U . . .
 C15E C 0.64601(16) 1.70386(15) 0.68854(8) 0.0397(7) Uani 1 1 d . . . . .
 H15E H 0.671251 1.731714 0.706231 0.048 Uiso 1 1 calc R U . . .
 C15B C -0.00918(17) 1.27945(15) 0.64346(8) 0.0419(7) Uani 1 1 d . . . . .
 H15B H -0.032172 1.250906 0.625487 0.050 Uiso 1 1 calc R U . . .
 C9F C 0.58418(18) 1.96363(16) 0.62550(8) 0.0456(7) Uani 1 1 d . . . . .
 H9F H 0.574638 1.970100 0.602130 0.055 Uiso 1 1 calc R U . . .
 C2A C 0.04503(18) 1.08383(15) 0.50094(8) 0.0434(7) Uani 1 1 d . . . . .
 H2A H 0.084579 1.088493 0.517746 0.052 Uiso 1 1 calc R U . . .
 C17C C 0.11008(16) 1.38163(18) 0.78845(8) 0.0464(8) Uani 1 1 d . . . . .
 H17C H 0.129156 1.384795 0.768535 0.056 Uiso 1 1 calc R U . . .
 C21C C 0.09508(16) 1.32260(15) 0.83742(9) 0.0437(7) Uani 1 1 d . . . . .
 H21C H 0.103547 1.285629 0.850888 0.052 Uiso 1 1 calc R U . . .
 C30A C 0.12920(17) 1.55072(17) 1.01380(8) 0.0451(7) Uani 1 1 d . . . . .
 H30A H 0.144614 1.596154 1.017350 0.054 Uiso 1 1 calc R U . . .
 C1E C 0.29590(17) 2.05202(15) 0.72070(8) 0.0427(7) Uani 1 1 d . . . . .
 H1E H 0.300894 2.098332 0.725587 0.051 Uiso 1 1 calc R U . . .
 C2G C 0.30158(18) 1.91398(16) 1.16952(8) 0.0447(7) Uani 1 1 d . . . . .
 H2G H 0.257281 1.905780 1.156597 0.054 Uiso 1 1 calc R U . . .
 C14F C 0.47153(16) 1.77952(16) 0.57799(9) 0.0450(7) Uani 1 1 d . . . . .
 H14F H 0.425873 1.760339 0.573902 0.054 Uiso 1 1 calc R U . . .
 C1B C 0.33621(18) 0.92490(18) 0.61811(9) 0.0507(8) Uani 1 1 d . . . . .
 H1B H 0.330078 0.878659 0.613061 0.061 Uiso 1 1 calc R U . . .
 C28F C 0.73278(17) 1.25623(16) 0.46831(8) 0.0441(7) Uani 1 1 d . . . . .
 C7A C -0.08763(17) 1.09034(17) 0.55588(8) 0.0458(7) Uani 1 1 d . . . . .
 H7A H -0.132031 1.091235 0.543140 0.055 Uiso 1 1 calc R U . . .
 C4A C -0.07586(19) 1.07492(16) 0.48411(8) 0.0474(8) Uani 1 1 d . . . . .
 H4A H -0.120874 1.072292 0.489050 0.057 Uiso 1 1 calc R U . . .
 C27A C 0.08498(19) 1.42118(18) 1.00334(9) 0.0520(9) Uani 1 1 d . . . . .
 H27A H 0.070806 1.375391 1.000421 0.062 Uiso 1 1 calc R U . . .
 C26B C -0.45004(17) 1.42054(17) 0.90680(10) 0.0486(8) Uani 1 1 d . . . . .
 H26B H -0.493982 1.398688 0.899425 0.058 Uiso 1 1 calc R U . . .
 C29A C 0.08498(17) 1.53161(16) 0.98432(8) 0.0429(7) Uani 1 1 d . . . . .
 H29A H 0.070663 1.562853 0.968159 0.051 Uiso 1 1 calc R U . . .
 C4G C 0.42309(18) 1.92898(17) 1.17412(8) 0.0468(8) Uani 1 1 d . . . . .
 H4G H 0.463332 1.931159 1.164403 0.056 Uiso 1 1 calc R U . . .
 C14D C 0.7928(2) 1.92931(18) 0.61376(9) 0.0545(9) Uani 1 1 d . . . . .
 H14D H 0.806143 1.966849 0.602252 0.065 Uiso 1 1 calc R U . . .
 C18D C 0.73868(17) 1.76940(17) 0.50801(8) 0.0470(8) Uani 1 1 d . . . . .
 H18D H 0.694571 1.769474 0.494876 0.056 Uiso 1 1 calc R U . . .
 C26D C 0.54865(18) 1.56423(18) 0.29764(8) 0.0478(8) Uani 1 1 d . . . . .
 H26D H 0.536047 1.594852 0.280881 0.057 Uiso 1 1 calc R U . . .
 C5I C 0.45988(16) 2.24035(16) 1.01113(9) 0.0444(7) Uani 1 1 d . . . . .
 H5I H 0.495542 2.257218 1.000094 0.053 Uiso 1 1 calc R U . . .
 C27I C 0.33426(17) 1.19741(15) 0.81623(8) 0.0441(7) Uani 1 1 d . . . . .
 H27I H 0.301048 1.209695 0.829040 0.053 Uiso 1 1 calc R U . . .
 C11C C 0.03108(16) 1.17801(17) 0.73511(9) 0.0464(8) Uani 1 1 d . . . . .
 H11C H -0.016242 1.173474 0.726179 0.056 Uiso 1 1 calc R U . . .
 C9C C 0.04774(17) 1.02540(15) 0.71048(8) 0.0412(7) Uani 1 1 d . . . . .
 H9C H 0.061368 1.019744 0.733739 0.049 Uiso 1 1 calc R U . . .
 C2B C 0.27943(18) 0.95756(16) 0.62298(9) 0.0459(7) Uani 1 1 d . . . . .
 H2B H 0.235730 0.934358 0.620968 0.055 Uiso 1 1 calc R U . . .
 C18A C -0.08556(17) 1.23973(16) 0.82069(9) 0.0453(7) Uani 1 1 d . . . . .
 H18A H -0.038743 1.240805 0.830416 0.054 Uiso 1 1 calc R U . . .
 C30E C 1.05341(19) 1.5349(2) 0.39960(9) 0.0548(9) Uani 1 1 d . . . . .
 H30E H 1.047765 1.516819 0.377355 0.066 Uiso 1 1 calc R U . . .
 C27E C 1.06831(16) 1.58745(16) 0.46252(9) 0.0445(7) Uani 1 1 d . . . . .
 H27E H 1.075228 1.606204 0.484675 0.053 Uiso 1 1 calc R U . . .
 C2C C -0.02983(17) 0.76456(16) 0.63509(8) 0.0448(7) Uani 1 1 d . . . . .
 H2C H -0.005767 0.782122 0.618564 0.054 Uiso 1 1 calc R U . . .
 C26H C 0.76771(18) 1.57379(17) 0.75848(10) 0.0502(8) Uani 1 1 d . . . . .
 H26H H 0.809357 1.600756 0.763646 0.060 Uiso 1 1 calc R U . . .
 C18F C 0.57845(17) 1.5679(2) 0.53022(8) 0.0505(8) Uani 1 1 d . . . . .
 H18F H 0.584353 1.530113 0.543319 0.061 Uiso 1 1 calc R U . . .
 C4C C -0.0745(2) 0.77595(17) 0.68591(9) 0.0516(8) Uani 1 1 d . . . . .
 H4C H -0.082427 0.801804 0.704574 0.062 Uiso 1 1 calc R U . . .
 C4B C 0.35208(17) 1.05665(17) 0.63274(9) 0.0490(8) Uani 1 1 d . . . . .
 H4B H 0.359639 1.102837 0.637824 0.059 Uiso 1 1 calc R U . . .
 C29I C 0.42220(18) 1.22532(16) 0.78420(8) 0.0445(7) Uani 1 1 d . . . . .
 H29I H 0.449715 1.256827 0.774442 0.053 Uiso 1 1 calc R U . . .
 C17F C 0.54040(17) 1.6182(2) 0.53962(9) 0.0552(9) Uani 1 1 d . . . . .
 H17F H 0.520280 1.614684 0.559211 0.066 Uiso 1 1 calc R U . . .
 C5A C -0.0641(2) 1.07212(17) 0.45130(9) 0.0541(9) Uani 1 1 d . . . . .
 H5A H -0.102753 1.068761 0.433957 0.065 Uiso 1 1 calc R U . . .
 C15F C 0.49284(16) 1.82495(17) 0.60437(8) 0.0452(7) Uani 1 1 d . . . . .
 H15F H 0.461772 1.836733 0.618508 0.054 Uiso 1 1 calc R U . . .
 C5E C 0.22827(17) 1.95642(16) 0.71132(9) 0.0463(7) Uani 1 1 d . . . . .
 H5E H 0.184590 1.933339 0.709703 0.056 Uiso 1 1 calc R U . . .
 C11A C -0.13532(18) 1.17628(17) 0.67793(9) 0.0480(8) Uani 1 1 d . . . . .
 H11A H -0.131000 1.209363 0.662172 0.058 Uiso 1 1 calc R U . . .
 C1A C 0.0502(2) 1.07896(15) 0.46731(8) 0.0467(8) Uani 1 1 d . . . . .
 H1A H 0.094637 1.079326 0.461697 0.056 Uiso 1 1 calc R U . . .
 C17A C -0.11170(17) 1.19578(17) 0.79364(9) 0.0487(8) Uani 1 1 d . . . . .
 H17A H -0.082551 1.167665 0.784702 0.058 Uiso 1 1 calc R U . . .
 C1H C -0.02383(18) 2.07204(18) 1.05722(9) 0.0497(8) Uani 1 1 d . . . . .
 H1H H -0.016802 2.118596 1.061043 0.060 Uiso 1 1 calc R U . . .
 C26I C 0.3449(2) 1.13111(17) 0.81079(9) 0.0524(8) Uani 1 1 d . . . . .
 H26I H 0.317445 1.098426 0.819825 0.063 Uiso 1 1 calc R U . . .
 C20F C 0.59784(18) 1.62864(17) 0.48258(10) 0.0521(8) Uani 1 1 d . . . . .
 H20F H 0.617477 1.632542 0.462863 0.063 Uiso 1 1 calc R U . . .
 C30H C 0.70042(18) 1.4959(2) 0.72473(8) 0.0548(9) Uani 1 1 d . . . . .
 H30H H 0.693248 1.466538 0.705570 0.066 Uiso 1 1 calc R U . . .
 C29H C 0.64958(17) 1.49680(19) 0.74398(8) 0.0484(8) Uani 1 1 d . . . . .
 H29H H 0.608868 1.468556 0.738411 0.058 Uiso 1 1 calc R U . . .
 C30B C -0.37675(19) 1.4824(2) 0.94606(9) 0.0565(9) Uani 1 1 d . . . . .
 H30B H -0.367348 1.505031 0.967348 0.068 Uiso 1 1 calc R U . . .
 C5H C -0.09246(17) 1.97707(17) 1.05504(9) 0.0483(8) Uani 1 1 d . . . . .
 H5H H -0.134674 1.954920 1.057794 0.058 Uiso 1 1 calc R U . . .
 C17D C 0.75912(18) 1.81594(18) 0.53437(9) 0.0507(8) Uani 1 1 d . . . . .
 H17D H 0.729199 1.847649 0.539413 0.061 Uiso 1 1 calc R U . . .
 C12A C -0.16731(17) 1.18868(17) 0.70535(9) 0.0485(8) Uani 1 1 d . . . . .
 H12A H -0.184317 1.230403 0.708688 0.058 Uiso 1 1 calc R U . . .
 C12C C 0.05683(16) 1.22634(17) 0.75994(9) 0.0478(8) Uani 1 1 d . . . . .
 H12C H 0.027145 1.254523 0.768414 0.057 Uiso 1 1 calc R U . . .
 C16F C 0.53206(16) 1.67287(18) 0.52053(9) 0.0493(8) Uani 1 1 d . . . . .
 C15D C 0.75791(19) 1.93673(18) 0.64058(9) 0.0509(8) Uani 1 1 d . . . . .
 H15D H 0.747312 1.979296 0.647467 0.061 Uiso 1 1 calc R U . . .
 C30C C -0.12446(19) 1.83018(17) 0.88958(9) 0.0521(8) Uani 1 1 d . . . . .
 H30C H -0.157282 1.841437 0.902846 0.063 Uiso 1 1 calc R U . . .
 C7F C 0.6115(2) 2.08521(17) 0.64132(8) 0.0522(8) Uani 1 1 d . . . . .
 H7F H 0.604326 2.103620 0.619872 0.063 Uiso 1 1 calc R U . . .
 C29F C 0.7753(2) 1.23899(18) 0.44650(10) 0.0559(9) Uani 1 1 d . . . . .
 H29F H 0.793762 1.270784 0.433056 0.067 Uiso 1 1 calc R U . . .
 C1G C 0.3108(2) 1.92320(16) 1.20399(8) 0.0495(8) Uani 1 1 d . . . . .
 H1G H 0.271310 1.921053 1.214324 0.059 Uiso 1 1 calc R U . . .
 C30I C 0.4291(2) 1.15860(18) 0.78078(9) 0.0544(9) Uani 1 1 d . . . . .
 H30I H 0.462855 1.145318 0.768510 0.065 Uiso 1 1 calc R U . . .
 C5C C -0.0976(2) 0.70993(19) 0.68139(10) 0.0625(10) Uani 1 1 d . . . . .
 H5C H -0.120298 0.690811 0.698035 0.075 Uiso 1 1 calc R U . . .
 C5G C 0.4263(2) 1.93759(18) 1.20847(8) 0.0525(9) Uani 1 1 d . . . . .
 H5G H 0.470021 1.945860 1.221994 0.063 Uiso 1 1 calc R U . . .
 C1C C -0.0566(2) 0.69942(18) 0.63274(9) 0.0560(9) Uani 1 1 d . . . . .
 H1C H -0.050694 0.672966 0.613878 0.067 Uiso 1 1 calc R U . . .
 C12D C 0.7878(2) 1.81319(19) 0.61984(10) 0.0623(10) Uani 1 1 d . . . . .
 H12D H 0.797711 1.770605 0.612601 0.075 Uiso 1 1 calc R U . . .
 C26A C 0.1290(2) 1.4463(2) 1.03180(9) 0.0585(10) Uani 1 1 d . . . . .
 H26A H 0.144166 1.416295 1.048455 0.070 Uiso 1 1 calc R U . . .
 C26E C 1.12125(18) 1.58757(18) 0.44450(10) 0.0516(8) Uani 1 1 d . . . . .
 H26E H 1.164637 1.607165 0.454853 0.062 Uiso 1 1 calc R U . . .
 C11D C 0.7531(2) 1.82019(19) 0.64659(10) 0.0635(11) Uani 1 1 d . . . . .
 H11D H 0.739125 1.782278 0.657666 0.076 Uiso 1 1 calc R U . . .
 C27C C -0.0321(2) 1.79700(17) 0.85131(10) 0.0538(9) Uani 1 1 d . . . . .
 H27C H 0.000482 1.787062 0.837633 0.065 Uiso 1 1 calc R U . . .
 C5B C 0.40517(19) 1.01966(18) 0.62705(10) 0.0543(9) Uani 1 1 d . . . . .
 H5B H 0.449016 1.042153 0.628184 0.065 Uiso 1 1 calc R U . . .
 C26C C -0.0477(2) 1.86138(18) 0.85644(10) 0.0630(10) Uani 1 1 d . . . . .
 H26C H -0.024175 1.895320 0.846163 0.076 Uiso 1 1 calc R U . . .
 C21F C 0.55943(19) 1.67848(18) 0.49212(10) 0.0560(9) Uani 1 1 d . . . . .
 H21F H 0.552506 1.715959 0.478855 0.067 Uiso 1 1 calc R U . . .
 C27F C 0.7073(2) 1.20816(19) 0.48741(11) 0.0604(10) Uani 1 1 d . . . . .
 H27F H 0.678165 1.218636 0.502780 0.073 Uiso 1 1 calc R U . . .
 C26F C 0.7255(2) 1.14457(19) 0.48347(13) 0.0693(11) Uani 1 1 d . . . . .
 H26F H 0.707456 1.111562 0.496412 0.083 Uiso 1 1 calc R U . . .
 C30F C 0.7900(2) 1.1734(2) 0.44492(11) 0.0671(11) Uani 1 1 d . . . . .
 H30F H 0.819143 1.161620 0.429807 0.081 Uiso 1 1 calc R U . . .
 C11F C 0.60392(19) 1.8350(2) 0.59035(11) 0.0687(12) Uani 1 1 d . . . . .
 H11F H 0.649657 1.853963 0.594559 0.082 Uiso 1 1 calc R U . . .
 C12F C 0.58303(19) 1.7889(2) 0.56401(12) 0.0761(14) Uani 1 1 d . . . . .
 H12F H 0.614567 1.775857 0.550399 0.091 Uiso 1 1 calc R U . . .
 C3F C 0.64421(19) 2.18903(18) 0.67664(9) 0.0542(8) Uiso 1 1 d D . . . .
 C1F C 0.6590(2) 2.2880(2) 0.70973(12) 0.0688(11) Uiso 1 1 d D . . . .
 H1F H 0.661968 2.308513 0.731341 0.083 Uiso 1 1 calc R U . . .
 N1F N 0.6654(2) 2.3263(2) 0.68491(12) 0.0926(13) Uiso 1 1 d D . . . .
 C2F C 0.6482(2) 2.2199(2) 0.70687(10) 0.0624(10) Uiso 1 1 d D . . . .
 H2F H 0.643571 2.195129 0.725991 0.075 Uiso 1 1 calc R U . . .
 B9 B 0.40191(18) 2.0700(2) 0.89710(9) 0.0438(8) Uani 1 1 d . . . . .
 F33 F 0.44071(10) 2.07749(11) 0.87163(5) 0.0531(5) Uani 1 1 d . . . . .
 F34 F 0.44543(9) 2.07472(9) 0.92798(5) 0.0473(4) Uani 1 1 d . . . . .
 F35 F 0.35791(12) 2.12003(13) 0.89622(6) 0.0671(6) Uani 1 1 d . . . . .
 F36 F 0.36497(11) 2.00925(12) 0.89287(6) 0.0659(6) Uani 1 1 d . . . . .
 N1S4 N 0.82245(16) 1.87666(16) 0.97393(9) 0.0600(8) Uani 1 1 d . . . . .
 C1S4 C 0.8207(2) 1.8216(2) 0.97985(10) 0.0588(9) Uani 1 1 d . . . . .
 C2S4 C 0.8155(3) 1.7514(2) 0.98719(13) 0.0765(13) Uani 1 1 d . . . . .
 H2SA H 0.770289 1.731299 0.977113 0.115 Uiso 1 1 calc R U . . .
 H2SB H 0.822232 1.746749 1.011486 0.115 Uiso 1 1 calc R U . . .
 H2SC H 0.850556 1.729090 0.977890 0.115 Uiso 1 1 calc R U . . .
 C4F C 0.6587(3) 2.2254(3) 0.65026(14) 0.0899(15) Uiso 1 1 d D . . . .
 H4F H 0.661661 2.204647 0.629319 0.108 Uiso 1 1 calc R U . . .
 C1S9 C 0.47994(18) 2.16934(18) 0.69635(10) 0.0518(8) Uani 1 1 d . . . . .
 N1S9 N 0.48995(16) 2.11572(16) 0.70098(9) 0.0582(8) Uani 1 1 d . . . . .
 C2S9 C 0.4665(2) 2.2384(2) 0.69089(13) 0.0729(12) Uani 1 1 d . . . . .
 H2SD H 0.497757 2.267047 0.707417 0.109 Uiso 1 1 calc R U . . .
 H2SE H 0.419363 2.244767 0.693305 0.109 Uiso 1 1 calc R U . . .
 H2SF H 0.473561 2.249593 0.668307 0.109 Uiso 1 1 calc R U . . .
 B8 B 0.0597(2) 1.6467(2) 0.57542(10) 0.0519(9) Uani 1 1 d . . . . .
 F31 F 0.07838(13) 1.61957(12) 0.60615(6) 0.0670(6) Uani 1 1 d . . . . .
 F29 F 0.08996(11) 1.61392(14) 0.55127(6) 0.0713(7) Uani 1 1 d . . . . .
 F32 F 0.07989(14) 1.71339(12) 0.57726(6) 0.0742(7) Uani 1 1 d . . . . .
 F30 F -0.01054(10) 1.63785(12) 0.56555(5) 0.0632(6) Uani 1 1 d . . . . .
 B3 B 0.0801(2) 1.2258(2) 0.92291(11) 0.0496(9) Uani 1 1 d . . . . .
 F9 F 0.04327(12) 1.23170(10) 0.94882(6) 0.0673(6) Uani 1 1 d . . . . .
 F12 F 0.13067(12) 1.18343(11) 0.93131(7) 0.0673(6) Uani 1 1 d . . . . .
 F11 F 0.10986(14) 1.28746(11) 0.91798(7) 0.0777(7) Uani 1 1 d . . . . .
 F10 F 0.03768(17) 1.20268(17) 0.89431(8) 0.1063(11) Uani 1 1 d . . . . .
 F8 F 0.35991(11) 1.32642(11) 0.72869(5) 0.0606(5) Uani 1 1 d . . . . .
 F7 F 0.30447(11) 1.22350(10) 0.72155(6) 0.0584(5) Uani 1 1 d . . . . .
 F5 F 0.28880(11) 1.29605(11) 0.67984(5) 0.0587(5) Uani 1 1 d . . . . .
 F6 F 0.24667(12) 1.31420(12) 0.72826(6) 0.0687(6) Uani 1 1 d . . . . .
 B2 B 0.3000(2) 1.28952(19) 0.71478(10) 0.0482(9) Uani 1 1 d . . . . .
 F44 F 0.18205(10) 1.80819(10) 0.72620(5) 0.0510(5) Uani 1 1 d . . . . .
 F41 F 0.28256(10) 1.76139(10) 0.72694(5) 0.0550(5) Uani 1 1 d . . . . .
 F42 F 0.24117(12) 1.77814(12) 0.77556(5) 0.0646(6) Uani 1 1 d . . . . .
 F43 F 0.18919(11) 1.69978(10) 0.73643(6) 0.0585(5) Uani 1 1 d . . . . .
 B11 B 0.2238(2) 1.76222(19) 0.74166(9) 0.0438(8) Uani 1 1 d . . . . .
 F14A F 0.6560(4) 1.3470(5) 0.7845(4) 0.082(2) Uani 0.680(9) 1 d D . P A 1
 F13A F 0.5742(3) 1.3234(4) 0.81739(16) 0.088(2) Uani 0.680(9) 1 d D . P A 1
 F16A F 0.5882(3) 1.2510(2) 0.77641(16) 0.0804(15) Uani 0.680(9) 1 d D . P A
 1
 F15A F 0.54358(19) 1.3463(3) 0.76371(12) 0.0853(18) Uani 0.680(9) 1 d D . P A
 1
 B4A B 0.5908(5) 1.3164(4) 0.7856(2) 0.0611(12) Uani 0.680(9) 1 d D . P A 1
 B4 B 0.0138(7) 1.6954(7) 0.9522(4) 0.040(3) Uani 0.49(5) 1 d D . P B 1
 F28 F 0.0377(11) 1.6853(13) 0.9857(4) 0.051(4) Uani 0.49(5) 1 d D . P B 1
 F19 F 0.0319(11) 1.7594(8) 0.9447(7) 0.053(4) Uani 0.49(5) 1 d D . P B 1
 F25 F 0.0411(12) 1.6517(8) 0.9325(3) 0.068(3) Uani 0.49(5) 1 d D . P B 1
 F26 F -0.0564(6) 1.6837(11) 0.9462(5) 0.071(4) Uani 0.49(5) 1 d D . P B 1
 F21 F 0.35708(11) 1.67343(11) 0.65661(5) 0.0597(5) Uani 1 1 d . . . . .
 F22 F 0.37845(13) 1.64832(11) 0.60452(6) 0.0657(6) Uani 1 1 d . . . . .
 F23 F 0.34804(12) 1.75073(10) 0.61692(6) 0.0641(6) Uani 1 1 d . . . . .
 F24 F 0.27086(11) 1.66131(11) 0.61172(6) 0.0624(6) Uani 1 1 d . . . . .
 B6 B 0.3391(2) 1.6841(2) 0.62258(11) 0.0486(9) Uani 1 1 d . . . . .
 B7A B 0.4073(9) 1.2167(7) 0.5927(4) 0.058(4) Uani 0.45(3) 1 d D . P C 1
 F25A F 0.3573(11) 1.2152(11) 0.6123(6) 0.091(6) Uani 0.45(3) 1 d D . P C 1
 F28A F 0.4555(11) 1.1741(9) 0.6047(6) 0.097(6) Uani 0.45(3) 1 d D . P C 1
 F27A F 0.4366(8) 1.2799(4) 0.5922(6) 0.078(4) Uani 0.45(3) 1 d D . P C 1
 F26A F 0.3820(8) 1.1928(11) 0.5607(3) 0.109(4) Uani 0.45(3) 1 d D . P C 1
 F2 F -0.10361(13) 1.92683(15) 0.73893(7) 0.0816(7) Uani 1 1 d . . . . .
 F1 F -0.10988(11) 1.94578(15) 0.79369(7) 0.0810(8) Uani 1 1 d . . . . .
 F3 F -0.02506(16) 1.88915(18) 0.77917(8) 0.1031(11) Uani 1 1 d . . . . .
 F4 F -0.02548(15) 1.99655(18) 0.77099(8) 0.1029(10) Uani 1 1 d . . . . .
 B1 B -0.0664(2) 1.9378(3) 0.77100(12) 0.0616(11) Uani 1 1 d . . . . .
 F45A F 0.7443(2) 1.6514(3) 0.86313(13) 0.0608(15) Uani 0.661(14) 1 d D . P D
 1
 F46A F 0.6603(3) 1.6383(4) 0.89361(18) 0.076(2) Uani 0.661(14) 1 d D . P D 1
 F48A F 0.7284(5) 1.7337(3) 0.8994(3) 0.097(3) Uani 0.661(14) 1 d D . P D 1
 B12A B 0.7237(4) 1.6671(4) 0.89337(19) 0.0504(19) Uani 0.661(14) 1 d D . P D
 1
 F47A F 0.7699(3) 1.6411(4) 0.91643(16) 0.112(2) Uani 0.661(14) 1 d D . P D 1
 N1S1 N 0.13448(17) 1.86629(16) 0.63415(9) 0.0582(8) Uani 1 1 d . . . . .
 C1S1 C 0.15158(18) 1.81524(17) 0.64096(9) 0.0485(8) Uani 1 1 d . . . . .
 C2S1 C 0.1744(3) 1.7505(2) 0.64938(11) 0.0758(13) Uani 1 1 d . . . . .
 H2SG H 0.143034 1.716229 0.636321 0.114 Uiso 1 1 calc R U . . .
 H2SH H 0.175186 1.744263 0.673306 0.114 Uiso 1 1 calc R U . . .
 H2SI H 0.220323 1.747417 0.644166 0.114 Uiso 1 1 calc R U . . .
 N1 N 0.13009(16) 1.51789(15) 0.73144(8) 0.0516(7) Uani 1 1 d . . . . .
 C1 C 0.10674(17) 1.55278(18) 0.71226(9) 0.0472(8) Uani 1 1 d . . . . .
 C2 C 0.0770(2) 1.5976(2) 0.68790(10) 0.0663(10) Uani 1 1 d . . . . .
 H2J H 0.091038 1.588185 0.666330 0.099 Uiso 1 1 calc R U . . .
 H2K H 0.092533 1.643247 0.695549 0.099 Uiso 1 1 calc R U . . .
 H2L H 0.027132 1.591766 0.685326 0.099 Uiso 1 1 calc R U . . .
 N1S8 N 0.46549(17) 1.9165(2) 0.78482(9) 0.0669(9) Uani 1 1 d . . . . .
 C1S8 C 0.41628(19) 1.92954(19) 0.79288(9) 0.0517(8) Uani 1 1 d . . . . .
 C2S8 C 0.3522(2) 1.94643(19) 0.80271(10) 0.0568(9) Uani 1 1 d . . . . .
 H2SJ H 0.335629 1.984357 0.790294 0.085 Uiso 1 1 calc R U . . .
 H2SK H 0.359731 1.957700 0.826772 0.085 Uiso 1 1 calc R U . . .
 H2SL H 0.318212 1.908571 0.797639 0.085 Uiso 1 1 calc R U . . .
 N1S5 N -0.13941(18) 2.0808(2) 0.88416(11) 0.0792(11) Uani 1 1 d . . . . .
 C2S5 C -0.0292(2) 2.0517(2) 0.86306(11) 0.0647(10) Uani 1 1 d . . . . .
 H2SM H -0.039393 2.038395 0.839207 0.097 Uiso 1 1 calc R U . . .
 H2SN H -0.010265 2.015103 0.875827 0.097 Uiso 1 1 calc R U . . .
 H2SO H 0.004128 2.090235 0.866453 0.097 Uiso 1 1 calc R U . . .
 C1S5 C -0.09168(19) 2.0684(2) 0.87450(10) 0.0586(9) Uani 1 1 d . . . . .
 N1T6 N 0.18553(19) 2.0781(3) 0.55931(9) 0.0856(13) Uani 1 1 d . . . . .
 C1T6 C 0.2347(2) 2.0681(3) 0.55099(11) 0.0769(13) Uani 1 1 d . . . . .
 C2T6 C 0.2987(3) 2.0522(3) 0.54037(16) 0.1026(19) Uani 1 1 d . . . . .
 H2TA H 0.315100 2.013116 0.551740 0.154 Uiso 1 1 calc R U . . .
 H2TB H 0.332897 2.089691 0.546193 0.154 Uiso 1 1 calc R U . . .
 H2TC H 0.290711 2.043242 0.516103 0.154 Uiso 1 1 calc R U . . .
 C1T1 C 0.49181(19) 1.75892(19) 1.09054(10) 0.0545(9) Uani 1 1 d . . . . .
 N1T1 N 0.46943(19) 1.7570(2) 1.06152(9) 0.0723(10) Uani 1 1 d . . . . .
 C2T1 C 0.5155(3) 1.7608(2) 1.12563(11) 0.0788(13) Uani 1 1 d . . . . .
 H2TD H 0.476739 1.752585 1.137355 0.118 Uiso 1 1 calc R U . . .
 H2TE H 0.538695 1.804307 1.132807 0.118 Uiso 1 1 calc R U . . .
 H2TF H 0.547487 1.726671 1.130924 0.118 Uiso 1 1 calc R U . . .
 C1S2 C 0.2521(2) 1.7132(2) 1.09441(11) 0.0611(10) Uani 1 1 d . . . . .
 C2S2 C 0.3135(2) 1.7384(2) 1.11665(13) 0.0742(12) Uani 1 1 d . . . . .
 H2SP H 0.327886 1.704847 1.132677 0.111 Uiso 1 1 calc R U . . .
 H2SQ H 0.304624 1.778360 1.128780 0.111 Uiso 1 1 calc R U . . .
 H2SR H 0.349746 1.748960 1.103574 0.111 Uiso 1 1 calc R U . . .
 N1S2 N 0.2027(3) 1.6895(3) 1.07599(12) 0.1001(15) Uani 1 1 d . . . . .
 N1T9 N 0.4825(2) 1.4856(2) 0.58185(11) 0.0810(12) Uani 1 1 d D . . . .
 C1T9 C 0.5087(3) 1.4486(3) 0.59784(19) 0.0964(18) Uani 1 1 d D . . . .
 C2T9 C 0.5436(4) 1.4026(4) 0.6209(3) 0.164(4) Uani 1 1 d D . . . .
 H2TG H 0.569350 1.373987 0.608686 0.245 Uiso 1 1 calc R U . . .
 H2TH H 0.509798 1.375516 0.630645 0.245 Uiso 1 1 calc R U . . .
 H2TI H 0.574987 1.427788 0.638855 0.245 Uiso 1 1 calc R U . . .
 O1EW O 0.7075(2) 1.7465(2) 0.77526(9) 0.0590(9) Uani 0.6667 1 d D . P E 1
 C4EW C 0.8236(5) 1.7628(6) 0.7706(2) 0.069(2) Uani 0.6667 1 d D . P E 1
 H4EA H 0.818058 1.722348 0.756283 0.103 Uiso 0.6667 1 calc R U P E 1
 H4EB H 0.870334 1.768463 0.783024 0.103 Uiso 0.6667 1 calc R U P E 1
 H4EC H 0.814746 1.800850 0.756641 0.103 Uiso 0.6667 1 calc R U P E 1
 C2EW C 0.6549(3) 1.7369(3) 0.79471(17) 0.0543(15) Uani 0.6667 1 d D . P E 1
 H2EA H 0.651652 1.777742 0.808074 0.065 Uiso 0.6667 1 calc R U P E 1
 H2EB H 0.664800 1.700770 0.810241 0.065 Uiso 0.6667 1 calc R U P E 1
 C1EW C 0.5880(4) 1.7191(5) 0.77060(19) 0.0591(19) Uani 0.6667 1 d D . P E 1
 H1EA H 0.576731 1.756618 0.756631 0.089 Uiso 0.6667 1 calc R U P E 1
 H1EB H 0.551325 1.708627 0.783438 0.089 Uiso 0.6667 1 calc R U P E 1
 H1EC H 0.592966 1.680626 0.756306 0.089 Uiso 0.6667 1 calc R U P E 1
 C3EW C 0.7739(3) 1.7578(3) 0.79493(16) 0.0631(14) Uani 0.6667 1 d D . P E 1
 H3EA H 0.783589 1.720749 0.809903 0.076 Uiso 0.6667 1 calc R U P E 1
 H3EB H 0.777328 1.799174 0.808815 0.076 Uiso 0.6667 1 calc R U P E 1
 N1S7 N 0.6773(2) 1.6363(2) 1.01523(13) 0.0927(14) Uani 1 1 d . . . . .
 C1S7 C 0.6225(3) 1.6165(2) 1.01271(11) 0.0732(12) Uani 1 1 d . . . . .
 C2S7 C 0.5495(2) 1.5874(2) 1.00763(12) 0.0739(12) Uani 1 1 d . . . . .
 H2SS H 0.524932 1.601316 0.986316 0.111 Uiso 1 1 calc R U . . .
 H2ST H 0.527502 1.602875 1.025989 0.111 Uiso 1 1 calc R U . . .
 H2SU H 0.548590 1.539068 1.007278 0.111 Uiso 1 1 calc R U . . .
 C2T4 C 0.0561(2) 1.76452(19) 0.76387(10) 0.0571(9) Uani 1 1 d . . . . .
 H2TJ H 0.068832 1.768916 0.741661 0.086 Uiso 1 1 calc R U . . .
 H2TK H 0.097251 1.761256 0.780539 0.086 Uiso 1 1 calc R U . . .
 H2TL H 0.033102 1.803299 0.769460 0.086 Uiso 1 1 calc R U . . .
 C1T4 C 0.0110(2) 1.7060(2) 0.76379(10) 0.0603(10) Uani 1 1 d . . . . .
 N1T4 N -0.0245(3) 1.6601(2) 0.76382(12) 0.1032(17) Uani 1 1 d . . . . .
 O1EU O 0.1955(2) 2.0187(2) 0.83301(10) 0.1046(12) Uani 1 1 d D . . . .
 C3EU C 0.1824(4) 2.0603(4) 0.85919(14) 0.128(3) Uani 1 1 d D . . . .
 H3EC H 0.224965 2.069268 0.875642 0.154 Uiso 1 1 calc R U . . .
 H3ED H 0.148294 2.036899 0.870724 0.154 Uiso 1 1 calc R U . . .
 C1EU C 0.1549(3) 1.9419(3) 0.78919(15) 0.0913(16) Uani 1 1 d D . . . .
 H1ED H 0.174034 1.972859 0.774449 0.137 Uiso 1 1 calc R U . . .
 H1EE H 0.113848 1.917450 0.776748 0.137 Uiso 1 1 calc R U . . .
 H1EF H 0.188667 1.910817 0.797258 0.137 Uiso 1 1 calc R U . . .
 C2EU C 0.1371(3) 1.9791(3) 0.81814(17) 0.110(2) Uani 1 1 d D . . . .
 H2EC H 0.099300 2.007069 0.810536 0.132 Uiso 1 1 calc R U . . .
 H2ED H 0.122364 1.948188 0.834447 0.132 Uiso 1 1 calc R U . . .
 C4EU C 0.1565(3) 2.1255(3) 0.84790(16) 0.111(2) Uani 1 1 d D . . . .
 H4ED H 0.190838 2.150095 0.837331 0.166 Uiso 1 1 calc R U . . .
 H4EE H 0.147871 2.151463 0.867306 0.166 Uiso 1 1 calc R U . . .
 H4EF H 0.114145 2.117328 0.831760 0.166 Uiso 1 1 calc R U . . .
 N1S3 N 0.6414(3) 1.6671(2) 1.10630(12) 0.0914(13) Uani 1 1 d . . . . .
 C1S3 C 0.6762(2) 1.7050(2) 1.09447(12) 0.0668(11) Uani 1 1 d . . . . .
 C2S3 C 0.7179(3) 1.7529(2) 1.07911(14) 0.0807(14) Uani 1 1 d . . . . .
 H2SV H 0.713184 1.797402 1.088002 0.121 Uiso 1 1 calc R U . . .
 H2SW H 0.702766 1.750605 1.054810 0.121 Uiso 1 1 calc R U . . .
 H2SX H 0.765751 1.742978 1.084156 0.121 Uiso 1 1 calc R U . . .
 N1S6 N -0.2009(2) 1.3929(3) 0.65430(13) 0.1032(15) Uani 1 1 d . . . . .
 C2S6 C -0.1640(2) 1.5207(3) 0.66095(13) 0.0798(13) Uani 1 1 d . . . . .
 H2SY H -0.179947 1.542236 0.640092 0.120 Uiso 1 1 calc R U . . .
 H H -0.114146 1.526537 0.666144 0.120 Uiso 1 1 calc R U . . .
 HA H -0.183362 1.540549 0.679212 0.120 Uiso 1 1 calc R U . . .
 C1S6 C -0.1859(2) 1.4500(3) 0.65705(12) 0.0715(11) Uani 1 1 d . . . . .
 C2ET C 0.0623(3) 1.2581(3) 0.55552(16) 0.0686(16) Uiso 0.6667 1 d D . P F 1
 H2EE H 0.089486 1.226269 0.545660 0.082 Uiso 0.6667 1 calc R U P F 1
 H2EF H 0.029606 1.232246 0.566934 0.082 Uiso 0.6667 1 calc R U P F 1
 O1ET O 0.0281(4) 1.2879(3) 0.53148(17) 0.119(2) Uiso 0.6667 1 d D . P F 1
 C3ET C -0.0160(3) 1.2568(3) 0.50492(17) 0.0711(17) Uiso 0.6667 1 d D . P F 1
 H3EE H 0.001272 1.214400 0.498835 0.085 Uiso 0.6667 1 calc R U P F 1
 H3EF H -0.019124 1.284850 0.485266 0.085 Uiso 0.6667 1 calc R U P F 1
 C1ET C 0.1059(4) 1.2976(4) 0.57941(18) 0.0753(18) Uiso 0.6667 1 d D . P F 1
 H1EG H 0.079267 1.323981 0.592251 0.113 Uiso 0.6667 1 calc R U P F 1
 H1EH H 0.135649 1.327002 0.568384 0.113 Uiso 0.6667 1 calc R U P F 1
 H1EI H 0.133851 1.269659 0.594537 0.113 Uiso 0.6667 1 calc R U P F 1
 C4ET C -0.0838(5) 1.2444(5) 0.5142(3) 0.126(4) Uiso 0.6667 1 d D . P F 1
 H4EG H -0.112347 1.279750 0.506115 0.189 Uiso 0.6667 1 calc R U P F 1
 H4EH H -0.079286 1.243135 0.538573 0.189 Uiso 0.6667 1 calc R U P F 1
 H4EI H -0.104952 1.201882 0.503978 0.189 Uiso 0.6667 1 calc R U P F 1
 C5F C 0.6690(3) 2.2948(3) 0.65537(17) 0.1088(19) Uiso 1 1 d D . . . .
 H5F H 0.678880 2.320495 0.637319 0.131 Uiso 1 1 calc R U . . .
 B5A B 0.70813(13) 2.0893(2) 0.57602(9) 0.071(2) Uani 0.598(8) 1 d DG . P G 1
 F17A F 0.75766(18) 2.0639(2) 0.55952(11) 0.0780(16) Uani 0.598(8) 1 d DG . P G
 1
 F19A F 0.6887(3) 2.1485(3) 0.56185(15) 0.136(3) Uani 0.598(8) 1 d DG . P G 1
 F20A F 0.65102(18) 2.0435(3) 0.57270(11) 0.107(3) Uani 0.598(8) 1 d DG . P G
 1
 F18A F 0.73507(18) 2.1012(3) 0.60999(9) 0.106(2) Uani 0.598(8) 1 d DG . P G
 1
 B5B B 0.7059(3) 2.0410(5) 0.56048(19) 0.103(5) Uani 0.402(8) 1 d DG . P G 2
 F17B F 0.7594(3) 2.0404(5) 0.5420(2) 0.118(4) Uani 0.402(8) 1 d DG . P G 2
 F19B F 0.6591(4) 2.0850(7) 0.5466(2) 0.159(6) Uani 0.402(8) 1 d DG . P G 2
 F20B F 0.6732(5) 1.9774(6) 0.5597(3) 0.178(7) Uani 0.402(8) 1 d DG . P G 2
 F18B F 0.7321(4) 2.0616(5) 0.5937(2) 0.124(4) Uani 0.402(8) 1 d DG . P G 2
 B7B B 0.4086(7) 1.2227(6) 0.5991(3) 0.052(3) Uani 0.55(3) 1 d D . P C 2
 F25B F 0.3496(7) 1.2190(7) 0.6126(3) 0.058(3) Uani 0.55(3) 1 d D . P C 2
 F28B F 0.4491(7) 1.1724(5) 0.6093(4) 0.059(2) Uani 0.55(3) 1 d D . P C 2
 F27B F 0.4461(4) 1.2800(4) 0.6124(7) 0.094(4) Uani 0.55(3) 1 d D . P C 2
 F26B F 0.3925(6) 1.2260(12) 0.5649(3) 0.095(5) Uani 0.55(3) 1 d D . P C 2
 F16B F 0.5584(6) 1.2813(7) 0.7633(2) 0.093(5) Uani 0.320(9) 1 d D . P A 2
 F14B F 0.6601(9) 1.3297(12) 0.7867(9) 0.082(2) Uani 0.320(9) 1 d D . P A 2
 B4B B 0.5920(9) 1.3213(7) 0.7889(4) 0.0611(12) Uani 0.320(9) 1 d D . P A 2
 F13B F 0.5827(11) 1.3014(11) 0.8197(4) 0.123(7) Uani 0.320(9) 1 d D . P A 2
 F15B F 0.5676(4) 1.3826(5) 0.7884(3) 0.090(4) Uani 0.320(9) 1 d D . P A 2
 B2A B 0.0093(7) 1.6953(7) 0.9581(5) 0.041(3) Uani 0.51(5) 1 d D . P B 2
 F23A F 0.0395(10) 1.6778(11) 0.9898(4) 0.040(2) Uani 0.51(5) 1 d D . P B 2
 F24A F 0.0446(11) 1.7509(8) 0.9488(6) 0.050(3) Uani 0.51(5) 1 d D . P B 2
 F20 F 0.0107(16) 1.6434(5) 0.9356(3) 0.079(5) Uani 0.51(5) 1 d D . P B 2
 F15 F -0.0576(6) 1.7088(13) 0.9586(6) 0.080(4) Uani 0.51(5) 1 d D . P B 2
 B12B B 0.7185(7) 1.6768(9) 0.8834(4) 0.085(6) Uani 0.339(14) 1 d D . P D 2
 F47B F 0.7343(8) 1.6873(13) 0.8525(4) 0.144(8) Uani 0.339(14) 1 d D . P D 2
 F46B F 0.6500(5) 1.6690(10) 0.8810(4) 0.094(5) Uani 0.339(14) 1 d D . P D 2
 F48B F 0.7458(10) 1.7203(10) 0.9086(5) 0.137(9) Uani 0.339(14) 1 d D . P D 2
 F45B F 0.7482(8) 1.6198(8) 0.8900(8) 0.182(10) Uani 0.339(14) 1 d D . P D 2
 C1EV C 0.4518(6) 1.9459(5) 0.5407(3) 0.087(3) Uiso 0.5 1 d G . P H -1
 C2EV C 0.4727(9) 2.0147(5) 0.5305(4) 0.178(8) Uiso 0.5 1 d G . P H -1
 O1EV O 0.5004(8) 2.0092(6) 0.5005(3) 0.141(3) Uiso 0.5 1 d G . P H -1
 C3EV C 0.5217(9) 2.0711(7) 0.4886(4) 0.253(13) Uiso 0.5 1 d G . P H -1
 C4EV C 0.5502(15) 2.0591(10) 0.4567(5) 0.31(2) Uiso 0.5 1 d G . P H -1
 O1W O 0.6397(5) 1.9418(4) 0.5240(2) 0.114(3) Uiso 0.5 1 d . . P I 1
 N1T3 N -0.2063(5) 1.7486(5) 0.7322(2) 0.059(2) Uani 0.3333 1 d D . P J 2
 N1T5 N 0.5214(7) 1.6651(6) 0.7462(3) 0.079(3) Uani 0.3333 1 d D . P K 2
 C2T3 C -0.1647(7) 1.7539(7) 0.7973(3) 0.070(3) Uani 0.3333 1 d D . P J 2
 H2TM H -0.150600 1.800130 0.804358 0.105 Uiso 0.3333 1 calc R U P J 2
 H2TN H -0.125677 1.727176 0.802693 0.105 Uiso 0.3333 1 calc R U P J 2
 H2TO H -0.201315 1.737602 0.809038 0.105 Uiso 0.3333 1 calc R U P J 2
 C1T5 C 0.5603(11) 1.6978(10) 0.7616(5) 0.076(5) Uani 0.3333 1 d D . P K 2
 C2T5 C 0.6165(11) 1.7345(10) 0.7832(5) 0.077(6) Uani 0.3333 1 d D . P K 2
 H2TP H 0.649198 1.752906 0.769638 0.116 Uiso 0.3333 1 calc R U P K 2
 H2TQ H 0.639217 1.704907 0.799345 0.116 Uiso 0.3333 1 calc R U P K 2
 H2TR H 0.599252 1.770445 0.795123 0.116 Uiso 0.3333 1 calc R U P K 2
 C1T3 C -0.1896(13) 1.7491(14) 0.7605(4) 0.069(2) Uani 0.3333 1 d D . P J 2
 N1T2 N 0.1464(2) 1.52435(18) 0.89856(10) 0.0901(12) Uiso 1 1 d G . . . .
 C1T2 C 0.16739(16) 1.47848(16) 0.91196(8) 0.0734(12) Uiso 1 1 d G . . . .
 C2T2 C 0.1936(3) 1.4211(2) 0.92876(14) 0.117(2) Uiso 1 1 d G . . . .
 H2TS H 0.222907 1.399802 0.915209 0.176 Uiso 1 1 calc R U . . .
 H2TT H 0.155503 1.389813 0.931667 0.176 Uiso 1 1 calc R U . . .
 H2TU H 0.220208 1.435115 0.950713 0.176 Uiso 1 1 calc R U . . .
 N1T8 N 0.6176(5) 1.3199(4) 0.5605(2) 0.120(4) Uiso 0.5 1 d G . P . .
 C1T8 C 0.5900(3) 1.2672(4) 0.55555(16) 0.081(3) Uiso 0.5 1 d G . P . .
 C2T8 C 0.5554(5) 1.2014(4) 0.5492(3) 0.091(3) Uiso 0.5 1 d G . P . .
 H2TV H 0.517255 1.197282 0.561668 0.137 Uiso 0.5 1 calc R U P . .
 H2TW H 0.587482 1.168392 0.556547 0.137 Uiso 0.5 1 calc R U P . .
 H2TX H 0.538043 1.194293 0.525230 0.137 Uiso 0.5 1 calc R U P . .
 N1T7 N -0.2143(5) 1.2697(5) 0.5918(3) 0.081(3) Uiso 0.3333 1 d G . P L 2
 C1T7 C -0.1789(4) 1.2569(4) 0.5729(2) 0.062(3) Uiso 0.3333 1 d G . P L 2
 C2T7 C -0.1346(6) 1.2411(6) 0.5492(3) 0.076(4) Uiso 0.3333 1 d G . P L 2
 H2TY H -0.086900 1.251275 0.559674 0.114 Uiso 0.3333 1 calc R U P L 2
 HB H -0.144879 1.267287 0.529354 0.114 Uiso 0.3333 1 calc R U P L 2
 HC H -0.142223 1.193943 0.542639 0.114 Uiso 0.3333 1 calc R U P L 2
 N1I N 0.44690(14) 2.27537(13) 1.03766(7) 0.0454(6) Uani 1 1 d . . . . .

loop_
  _atom_site_aniso_label
  _atom_site_aniso_U_11
  _atom_site_aniso_U_22
  _atom_site_aniso_U_33
  _atom_site_aniso_U_23
  _atom_site_aniso_U_13
  _atom_site_aniso_U_12
 Cu2 0.02649(16) 0.03765(18) 0.02792(16) -0.00499(13) 0.00775(13) 0.00171(13)
 Cu5 0.02712(16) 0.03077(17) 0.03403(17) -0.00395(13) 0.01217(13) 0.00255(12)
 Cu6 0.02718(16) 0.03611(18) 0.02719(16) -0.00594(13) 0.00673(13) 0.00308(13)
 Cu4 0.02970(17) 0.0476(2) 0.02648(17) -0.00514(14) 0.00745(13) 0.00271(14)
 Cu3 0.03350(18) 0.0454(2) 0.03180(18) -0.00148(14) 0.01244(14) 0.00812(15)
 Cu1 0.0407(2) 0.03954(19) 0.03255(18) -0.00454(14) 0.01485(15) 0.00578(15)
 O1I 0.0295(9) 0.0341(10) 0.0321(10) -0.0086(8) 0.0050(8) 0.0045(8)
 O1G 0.0440(12) 0.0401(11) 0.0382(11) -0.0131(9) 0.0221(9) -0.0099(9)
 O1H 0.0521(12) 0.0365(10) 0.0349(10) 0.0018(8) 0.0215(9) 0.0145(9)
 O1B 0.0541(13) 0.0363(10) 0.0360(11) 0.0018(8) 0.0232(10) 0.0113(9)
 O1E 0.0611(14) 0.0395(11) 0.0417(12) 0.0051(9) 0.0302(11) 0.0175(10)
 O1A 0.0475(13) 0.0646(15) 0.0491(13) -0.0283(11) 0.0249(11) -0.0179(11)
 O1D 0.0500(13) 0.0666(15) 0.0402(12) -0.0258(11) 0.0245(10) -0.0204(11)
 N5B 0.0299(11) 0.0342(12) 0.0297(11) -0.0030(9) 0.0077(9) 0.0036(9)
 O1C 0.0335(11) 0.0532(13) 0.0604(14) -0.0282(11) 0.0086(10) 0.0056(10)
 N5H 0.0306(11) 0.0305(11) 0.0290(11) -0.0036(9) 0.0083(9) 0.0040(9)
 N4H 0.0288(11) 0.0332(11) 0.0292(11) -0.0043(9) 0.0089(9) 0.0033(9)
 N6H 0.0308(12) 0.0370(12) 0.0290(11) -0.0060(9) 0.0052(9) 0.0034(9)
 N4G 0.0295(11) 0.0339(12) 0.0310(12) -0.0048(9) 0.0105(9) 0.0019(9)
 N3H 0.0297(11) 0.0332(12) 0.0330(12) -0.0034(9) 0.0095(9) 0.0029(9)
 N7A 0.0318(12) 0.0367(12) 0.0302(11) -0.0036(9) 0.0070(9) 0.0016(9)
 N7D 0.0384(13) 0.0398(13) 0.0293(12) -0.0056(10) 0.0064(10) 0.0056(10)
 N6A 0.0292(11) 0.0347(12) 0.0320(12) -0.0042(9) 0.0093(9) 0.0027(9)
 N6G 0.0317(12) 0.0366(12) 0.0296(11) -0.0045(9) 0.0081(9) 0.0042(9)
 N5E 0.0342(12) 0.0382(12) 0.0293(11) -0.0042(9) 0.0092(10) 0.0048(10)
 N2H 0.0280(11) 0.0364(12) 0.0392(13) -0.0047(10) 0.0125(10) 0.0050(9)
 N6B 0.0296(11) 0.0348(12) 0.0310(12) -0.0042(9) 0.0069(9) 0.0011(9)
 N7H 0.0307(12) 0.0390(12) 0.0313(12) -0.0022(10) 0.0101(10) 0.0063(10)
 N6D 0.0349(12) 0.0413(13) 0.0303(12) -0.0057(10) 0.0079(10) 0.0045(10)
 N3I 0.0301(11) 0.0344(12) 0.0303(11) -0.0044(9) 0.0113(9) 0.0022(9)
 N7I 0.0362(12) 0.0338(12) 0.0371(13) -0.0057(10) 0.0073(10) 0.0064(10)
 N2G 0.0369(12) 0.0383(12) 0.0295(12) -0.0039(9) 0.0107(10) 0.0059(10)
 N2D 0.0341(12) 0.0432(13) 0.0296(12) -0.0049(10) 0.0101(10) 0.0023(10)
 N2I 0.0371(12) 0.0324(12) 0.0315(12) -0.0072(9) 0.0093(10) 0.0006(10)
 N7G 0.0357(12) 0.0355(12) 0.0276(11) -0.0057(9) 0.0058(10) 0.0037(10)
 N7E 0.0351(12) 0.0415(13) 0.0292(12) -0.0029(10) 0.0091(10) 0.0044(10)
 N6E 0.0324(12) 0.0406(13) 0.0290(11) -0.0038(10) 0.0059(10) 0.0023(10)
 N3E 0.0351(12) 0.0358(12) 0.0351(12) -0.0034(10) 0.0115(10) 0.0050(10)
 N7B 0.0304(12) 0.0373(12) 0.0321(12) -0.0025(9) 0.0105(10) 0.0042(9)
 N5I 0.0293(11) 0.0347(12) 0.0286(11) -0.0062(9) 0.0045(9) 0.0042(9)
 N4I 0.0275(11) 0.0334(12) 0.0315(11) -0.0063(9) 0.0088(9) 0.0029(9)
 N6I 0.0287(11) 0.0365(12) 0.0380(13) -0.0055(10) 0.0066(10) 0.0056(9)
 N7C 0.0353(12) 0.0334(12) 0.0401(13) -0.0022(10) 0.0106(10) 0.0024(10)
 N5C 0.0298(11) 0.0404(13) 0.0300(11) -0.0072(10) 0.0064(9) 0.0025(10)
 N2C 0.0477(14) 0.0375(13) 0.0326(12) -0.0053(10) 0.0101(11) 0.0016(11)
 N2E 0.0344(12) 0.0342(12) 0.0375(13) -0.0040(10) 0.0125(10) 0.0051(10)
 N3D 0.0347(12) 0.0419(13) 0.0334(12) -0.0046(10) 0.0101(10) 0.0061(10)
 N3A 0.0396(13) 0.0378(13) 0.0369(13) -0.0040(10) 0.0126(11) 0.0051(10)
 N2A 0.0428(14) 0.0393(13) 0.0363(13) -0.0060(10) 0.0120(11) 0.0060(11)
 O1F 0.0353(12) 0.0666(16) 0.0683(16) -0.0264(13) 0.0077(11) 0.0084(11)
 N4E 0.0377(13) 0.0373(13) 0.0364(13) -0.0040(10) 0.0136(10) 0.0071(10)
 N3G 0.0319(12) 0.0376(12) 0.0323(12) -0.0043(10) 0.0111(10) 0.0047(10)
 N7F 0.0390(13) 0.0418(14) 0.0419(14) -0.0031(11) 0.0103(11) 0.0022(11)
 N3B 0.0421(13) 0.0338(12) 0.0342(12) -0.0042(10) 0.0109(10) 0.0049(10)
 N2B 0.0407(13) 0.0352(12) 0.0401(13) -0.0042(10) 0.0112(11) 0.0049(10)
 N4D 0.0360(13) 0.0527(15) 0.0332(13) -0.0022(11) 0.0120(11) 0.0069(11)
 N4F 0.0328(12) 0.0406(13) 0.0400(13) -0.0031(11) 0.0101(10) 0.0008(10)
 N5F 0.0317(12) 0.0481(14) 0.0309(12) -0.0068(10) 0.0064(10) 0.0035(10)
 N5G 0.0364(12) 0.0348(12) 0.0303(12) -0.0042(9) 0.0093(10) 0.0013(10)
 N6C 0.0308(12) 0.0359(12) 0.0396(13) -0.0034(10) 0.0112(10) 0.0016(10)
 N8G 0.0411(14) 0.0489(15) 0.0291(12) -0.0053(10) 0.0069(10) -0.0011(11)
 N5A 0.0371(13) 0.0348(12) 0.0353(13) -0.0070(10) 0.0115(10) 0.0013(10)
 N4C 0.0408(13) 0.0380(13) 0.0365(13) -0.0092(10) 0.0133(11) 0.0021(10)
 N3C 0.0398(13) 0.0404(13) 0.0323(12) -0.0042(10) 0.0108(10) 0.0038(10)
 N4B 0.0464(15) 0.0342(12) 0.0398(13) -0.0045(10) 0.0154(11) 0.0038(11)
 N4A 0.0409(14) 0.0429(14) 0.0420(14) -0.0048(11) 0.0173(12) 0.0040(11)
 N6F 0.0325(12) 0.0440(14) 0.0372(13) -0.0049(11) 0.0099(10) 0.0005(10)
 N8D 0.0407(14) 0.0614(17) 0.0301(13) -0.0051(12) 0.0065(11) -0.0017(12)
 N3F 0.0383(13) 0.0488(15) 0.0364(13) -0.0013(11) 0.0123(11) 0.0031(11)
 N5D 0.0431(14) 0.0412(13) 0.0316(12) -0.0093(10) 0.0081(11) 0.0022(11)
 N1E 0.0428(15) 0.0427(14) 0.0539(16) -0.0023(12) 0.0148(12) 0.0119(12)
 N8A 0.0407(14) 0.0633(18) 0.0322(13) -0.0017(12) 0.0041(11) -0.0037(13)
 C23H 0.0297(13) 0.0326(13) 0.0300(13) -0.0049(11) 0.0053(11) 0.0037(11)
 N2F 0.0532(16) 0.0447(15) 0.0418(14) -0.0065(12) 0.0129(12) -0.0065(12)
 C13I 0.0293(13) 0.0314(13) 0.0303(13) -0.0054(10) 0.0047(11) 0.0053(10)
 N1D 0.0564(16) 0.0378(13) 0.0333(13) -0.0054(10) 0.0132(12) -0.0026(12)
 C23E 0.0351(14) 0.0353(14) 0.0277(13) -0.0043(11) 0.0068(11) 0.0034(11)
 C10H 0.0333(14) 0.0301(13) 0.0316(13) -0.0023(10) 0.0140(11) 0.0042(11)
 C22H 0.0292(13) 0.0322(13) 0.0306(13) -0.0048(10) 0.0056(11) 0.0036(10)
 C8H 0.0304(13) 0.0352(14) 0.0366(14) -0.0040(11) 0.0105(11) 0.0010(11)
 C23B 0.0283(13) 0.0332(13) 0.0309(13) -0.0032(11) 0.0067(11) 0.0025(10)
 N1B 0.0464(16) 0.0566(17) 0.0539(17) -0.0020(13) 0.0104(13) 0.0174(13)
 C22E 0.0340(14) 0.0376(14) 0.0294(13) -0.0022(11) 0.0067(11) 0.0061(11)
 C11G 0.0330(14) 0.0350(14) 0.0342(14) -0.0029(11) 0.0094(11) -0.0002(11)
 C9G 0.0304(13) 0.0374(14) 0.0321(14) -0.0045(11) 0.0097(11) 0.0031(11)
 C21G 0.0368(15) 0.0383(15) 0.0308(14) -0.0026(11) 0.0101(12) -0.0025(12)
 C10G 0.0269(13) 0.0387(14) 0.0299(13) -0.0044(11) 0.0094(11) 0.0056(11)
 C19H 0.0271(13) 0.0358(14) 0.0261(12) -0.0027(10) 0.0059(10) 0.0045(10)
 C23C 0.0302(14) 0.0410(15) 0.0327(14) -0.0038(12) 0.0086(11) 0.0001(11)
 C8G 0.0319(14) 0.0389(15) 0.0328(14) -0.0043(11) 0.0094(11) 0.0051(11)
 C16G 0.0434(16) 0.0351(14) 0.0298(14) -0.0063(11) 0.0164(12) -0.0044(12)
 C16H 0.0343(14) 0.0377(14) 0.0287(13) -0.0003(11) 0.0096(11) 0.0098(11)
 C24G 0.0424(16) 0.0355(14) 0.0315(14) -0.0060(11) 0.0081(12) 0.0053(12)
 C15I 0.0335(14) 0.0353(14) 0.0311(13) -0.0031(11) 0.0096(11) 0.0042(11)
 N1H 0.0398(15) 0.0593(17) 0.0524(16) -0.0068(13) 0.0122(12) 0.0156(13)
 C22B 0.0319(14) 0.0357(14) 0.0301(13) -0.0046(11) 0.0049(11) 0.0042(11)
 C17H 0.0385(15) 0.0333(14) 0.0327(14) -0.0065(11) 0.0079(12) 0.0040(11)
 C23I 0.0298(13) 0.0365(14) 0.0350(14) -0.0064(11) 0.0065(11) 0.0033(11)
 C16I 0.0268(13) 0.0319(13) 0.0324(13) -0.0032(11) 0.0099(11) 0.0026(10)
 N8E 0.0467(17) 0.074(2) 0.0598(19) 0.0205(16) 0.0257(15) 0.0206(15)
 N8B 0.0447(16) 0.0708(19) 0.0483(16) 0.0142(14) 0.0226(13) 0.0204(14)
 C23G 0.0372(15) 0.0356(14) 0.0314(14) -0.0019(11) 0.0089(12) 0.0041(12)
 C9H 0.0330(14) 0.0328(14) 0.0342(14) -0.0045(11) 0.0110(11) -0.0002(11)
 C21B 0.0333(14) 0.0340(14) 0.0383(15) -0.0002(11) 0.0112(12) 0.0042(11)
 C18H 0.0328(14) 0.0343(14) 0.0320(14) -0.0048(11) 0.0080(11) -0.0001(11)
 N1A 0.078(2) 0.0456(15) 0.0362(14) -0.0040(12) 0.0148(14) 0.0098(14)
 C8I 0.0345(14) 0.0354(14) 0.0309(13) -0.0047(11) 0.0108(11) 0.0032(11)
 N8I 0.087(2) 0.0417(16) 0.0459(16) -0.0051(13) 0.0073(16) 0.0202(15)
 C25G 0.0338(14) 0.0344(14) 0.0304(13) -0.0033(11) 0.0086(11) 0.0063(11)
 C24H 0.0312(14) 0.0368(14) 0.0319(14) -0.0045(11) 0.0080(11) 0.0040(11)
 C11I 0.0342(14) 0.0357(14) 0.0361(15) -0.0066(11) 0.0110(12) -0.0003(11)
 C23A 0.0331(14) 0.0348(14) 0.0341(14) -0.0036(11) 0.0118(12) 0.0017(11)
 C20I 0.0357(14) 0.0369(14) 0.0308(14) -0.0083(11) 0.0076(11) 0.0037(11)
 C24A 0.0383(15) 0.0346(14) 0.0341(14) 0.0000(11) 0.0103(12) 0.0028(12)
 C28A 0.0299(13) 0.0455(16) 0.0299(14) -0.0027(12) 0.0077(11) 0.0017(12)
 C24E 0.0330(14) 0.0372(14) 0.0309(14) -0.0023(11) 0.0070(11) 0.0058(11)
 C22C 0.0299(13) 0.0403(15) 0.0331(14) -0.0054(11) 0.0103(11) -0.0001(11)
 C16B 0.0384(15) 0.0424(15) 0.0304(14) 0.0006(12) 0.0137(12) 0.0082(12)
 N8H 0.0517(17) 0.074(2) 0.0432(15) 0.0127(14) 0.0227(13) 0.0235(15)
 C28D 0.0317(14) 0.0449(16) 0.0288(13) -0.0064(12) 0.0064(11) 0.0054(12)
 C21H 0.0307(13) 0.0321(13) 0.0358(14) 0.0004(11) 0.0082(11) 0.0042(11)
 C20B 0.0304(13) 0.0350(14) 0.0350(14) -0.0044(11) 0.0083(11) 0.0052(11)
 C8E 0.0357(15) 0.0356(14) 0.0403(15) -0.0022(12) 0.0128(12) 0.0047(12)
 C8C 0.0484(17) 0.0387(15) 0.0334(15) -0.0047(12) 0.0081(13) 0.0074(13)
 C25B 0.0290(13) 0.0390(15) 0.0300(13) -0.0041(11) 0.0081(11) 0.0027(11)
 C28G 0.0312(14) 0.0416(15) 0.0286(13) -0.0058(11) 0.0075(11) 0.0054(11)
 C6I 0.0335(14) 0.0361(14) 0.0309(13) -0.0046(11) 0.0108(11) 0.0014(11)
 C15H 0.0328(14) 0.0345(14) 0.0322(14) -0.0038(11) 0.0103(11) 0.0015(11)
 C19A 0.0435(16) 0.0351(14) 0.0338(14) -0.0057(12) 0.0145(13) -0.0022(12)
 C14G 0.0342(14) 0.0334(14) 0.0369(15) -0.0077(11) 0.0130(12) -0.0022(11)
 C24C 0.0344(14) 0.0388(15) 0.0368(15) -0.0039(12) 0.0112(12) 0.0001(12)
 C21E 0.0348(14) 0.0375(15) 0.0388(15) 0.0012(12) 0.0128(12) 0.0075(12)
 C10I 0.0299(13) 0.0315(13) 0.0310(13) -0.0055(11) 0.0060(11) 0.0055(10)
 C14I 0.0300(13) 0.0340(14) 0.0352(14) -0.0035(11) 0.0084(11) 0.0016(11)
 C6D 0.0327(14) 0.0395(15) 0.0335(14) -0.0032(11) 0.0111(12) 0.0041(11)
 N8C 0.078(2) 0.0398(15) 0.0618(19) -0.0012(14) 0.0168(17) 0.0115(15)
 C3G 0.0501(17) 0.0373(15) 0.0288(14) -0.0023(11) 0.0128(13) 0.0070(13)
 C19G 0.0407(15) 0.0340(14) 0.0272(13) -0.0040(11) 0.0118(11) 0.0002(12)
 C7I 0.0378(15) 0.0356(14) 0.0304(14) -0.0053(11) 0.0107(12) 0.0009(11)
 C25D 0.0322(14) 0.0412(15) 0.0293(13) -0.0044(11) 0.0069(11) 0.0041(11)
 C16A 0.0425(16) 0.0462(17) 0.0412(16) -0.0147(13) 0.0175(14) -0.0098(13)
 C3H 0.0311(14) 0.0426(16) 0.0349(14) -0.0045(12) 0.0110(12) 0.0084(12)
 C6B 0.0392(15) 0.0361(14) 0.0347(14) -0.0035(11) 0.0118(12) 0.0035(12)
 C24B 0.0313(14) 0.0367(14) 0.0322(14) -0.0029(11) 0.0061(11) 0.0040(11)
 C19B 0.0307(13) 0.0390(14) 0.0266(13) -0.0032(11) 0.0075(11) 0.0046(11)
 C20H 0.0285(13) 0.0320(13) 0.0335(14) -0.0040(11) 0.0062(11) 0.0058(10)
 C6H 0.0302(13) 0.0347(14) 0.0352(14) -0.0030(11) 0.0100(11) 0.0026(11)
 C27G 0.0376(15) 0.0404(15) 0.0324(14) -0.0030(12) 0.0081(12) -0.0005(12)
 C21A 0.0405(16) 0.0446(16) 0.0376(15) -0.0060(13) 0.0141(13) -0.0071(13)
 C15G 0.0326(14) 0.0356(14) 0.0354(14) -0.0099(11) 0.0114(12) -0.0002(11)
 C3E 0.0353(14) 0.0374(15) 0.0346(14) -0.0020(11) 0.0116(12) 0.0084(12)
 C10E 0.0396(15) 0.0357(14) 0.0355(14) -0.0015(11) 0.0163(12) 0.0065(12)
 C12I 0.0343(14) 0.0404(15) 0.0333(14) -0.0055(12) 0.0118(12) 0.0019(12)
 N1G 0.081(2) 0.0487(16) 0.0337(14) -0.0017(12) 0.0176(15) 0.0149(15)
 C11H 0.0370(15) 0.0400(15) 0.0338(14) -0.0039(12) 0.0079(12) 0.0060(12)
 C25A 0.0298(13) 0.0363(14) 0.0314(14) -0.0040(11) 0.0072(11) 0.0034(11)
 C20D 0.0425(16) 0.0412(16) 0.0358(15) -0.0022(12) 0.0105(13) 0.0018(13)
 C10B 0.0458(17) 0.0334(14) 0.0400(15) -0.0015(12) 0.0191(13) 0.0057(12)
 C22I 0.0292(13) 0.0368(15) 0.0348(14) -0.0069(11) 0.0067(11) 0.0023(11)
 C25H 0.0315(14) 0.0407(15) 0.0290(13) -0.0051(11) 0.0078(11) 0.0052(11)
 C2I 0.0375(15) 0.0384(15) 0.0352(15) -0.0050(12) 0.0088(12) 0.0039(12)
 C13D 0.0389(16) 0.0576(19) 0.0343(15) -0.0150(14) 0.0157(13) -0.0082(14)
 C25I 0.0336(14) 0.0382(15) 0.0377(15) -0.0054(12) 0.0071(12) 0.0071(12)
 C6E 0.0345(14) 0.0357(14) 0.0365(14) -0.0018(11) 0.0120(12) 0.0041(11)
 C7H 0.0314(14) 0.0350(14) 0.0454(16) -0.0037(12) 0.0138(12) 0.0019(11)
 C20A 0.0412(16) 0.0359(15) 0.0382(15) -0.0045(12) 0.0150(13) 0.0000(12)
 C22G 0.0417(16) 0.0362(15) 0.0328(14) -0.0032(11) 0.0113(12) 0.0043(12)
 C20G 0.0371(15) 0.0357(14) 0.0321(14) -0.0023(11) 0.0122(12) 0.0025(11)
 C6G 0.0367(15) 0.0360(14) 0.0334(14) -0.0048(11) 0.0118(12) 0.0037(11)
 C9I 0.0329(14) 0.0364(14) 0.0314(14) -0.0050(11) 0.0106(11) 0.0039(11)
 C21D 0.0419(16) 0.0505(18) 0.0321(15) -0.0043(13) 0.0087(13) -0.0061(13)
 C16E 0.0415(16) 0.0427(16) 0.0321(14) 0.0009(12) 0.0159(12) 0.0112(13)
 C3D 0.0398(15) 0.0354(14) 0.0308(14) -0.0051(11) 0.0109(12) 0.0018(12)
 C22A 0.0372(15) 0.0345(14) 0.0366(15) -0.0034(11) 0.0144(12) 0.0018(11)
 C13G 0.0327(14) 0.0378(14) 0.0310(14) -0.0047(11) 0.0123(11) 0.0024(11)
 C8B 0.0434(16) 0.0354(15) 0.0423(16) -0.0032(12) 0.0130(13) 0.0033(12)
 C10C 0.0443(16) 0.0390(15) 0.0345(15) -0.0086(12) 0.0131(13) 0.0014(13)
 C19I 0.0267(13) 0.0334(13) 0.0325(13) -0.0050(11) 0.0094(11) 0.0022(10)
 C28I 0.0450(17) 0.0344(15) 0.0369(15) -0.0063(12) 0.0017(13) 0.0094(12)
 C17B 0.0533(18) 0.0354(15) 0.0365(15) -0.0062(12) 0.0163(14) 0.0035(13)
 C17G 0.0397(15) 0.0371(15) 0.0382(15) -0.0049(12) 0.0178(13) 0.0022(12)
 C23D 0.0421(16) 0.0399(15) 0.0317(14) -0.0051(12) 0.0078(12) 0.0047(12)
 C24D 0.0459(17) 0.0392(15) 0.0345(15) -0.0045(12) 0.0068(13) 0.0038(13)
 C25C 0.0333(14) 0.0380(15) 0.0416(16) -0.0007(12) 0.0109(12) 0.0033(12)
 C19C 0.0253(13) 0.0431(16) 0.0373(15) -0.0129(12) 0.0092(11) 0.0003(11)
 C9E 0.0371(15) 0.0372(15) 0.0447(16) -0.0045(12) 0.0123(13) 0.0044(12)
 C22F 0.0327(15) 0.0504(18) 0.0384(16) -0.0065(13) 0.0101(12) 0.0009(13)
 C19E 0.0319(14) 0.0415(15) 0.0281(13) -0.0021(11) 0.0078(11) 0.0069(11)
 C3I 0.0337(14) 0.0314(14) 0.0360(14) -0.0046(11) 0.0042(12) 0.0024(11)
 C4I 0.0350(15) 0.0396(15) 0.0409(16) -0.0063(12) 0.0112(12) 0.0022(12)
 C12G 0.0368(15) 0.0346(14) 0.0323(14) -0.0079(11) 0.0107(12) -0.0012(11)
 C13B 0.0478(17) 0.0350(14) 0.0353(15) 0.0002(12) 0.0202(13) 0.0081(12)
 C21I 0.0315(14) 0.0386(15) 0.0295(13) -0.0057(11) 0.0030(11) 0.0035(11)
 C12H 0.0455(16) 0.0360(15) 0.0330(14) -0.0066(12) 0.0101(13) 0.0060(12)
 N8F 0.071(2) 0.0485(17) 0.075(2) -0.0005(16) 0.0131(18) 0.0106(16)
 C10F 0.0379(15) 0.0393(15) 0.0402(16) -0.0016(12) 0.0106(13) 0.0046(12)
 C14B 0.0414(16) 0.0460(17) 0.0413(16) -0.0010(13) 0.0140(13) 0.0088(13)
 C16D 0.0483(18) 0.0518(18) 0.0309(15) -0.0147(13) 0.0168(13) -0.0117(14)
 C13C 0.0367(15) 0.0442(16) 0.0445(17) -0.0154(13) 0.0113(13) 0.0009(13)
 C23F 0.0319(14) 0.0478(17) 0.0381(15) -0.0046(13) 0.0096(12) 0.0004(12)
 C14H 0.0337(14) 0.0384(15) 0.0354(14) 0.0011(12) 0.0129(12) 0.0072(12)
 C7G 0.0342(14) 0.0410(15) 0.0317(14) -0.0056(11) 0.0105(12) 0.0051(12)
 C14A 0.0410(16) 0.0547(19) 0.0357(15) -0.0070(13) 0.0130(13) -0.0016(14)
 C18G 0.0352(14) 0.0415(15) 0.0329(14) -0.0034(12) 0.0098(12) 0.0033(12)
 C13E 0.0500(17) 0.0381(15) 0.0380(15) 0.0022(12) 0.0235(14) 0.0130(13)
 C20C 0.0371(15) 0.0368(15) 0.0493(17) -0.0097(13) 0.0179(13) -0.0009(12)
 C7E 0.0375(15) 0.0324(14) 0.0454(16) -0.0045(12) 0.0121(13) 0.0036(12)
 C19D 0.0438(16) 0.0420(16) 0.0293(14) -0.0052(12) 0.0099(12) -0.0020(13)
 N1C 0.082(2) 0.0484(17) 0.0604(19) -0.0075(15) 0.0170(17) -0.0138(16)
 C24I 0.0335(14) 0.0370(15) 0.0427(16) -0.0065(12) 0.0073(12) 0.0033(12)
 C6A 0.0409(16) 0.0381(15) 0.0335(14) -0.0026(12) 0.0127(12) 0.0053(12)
 C3B 0.0398(16) 0.0423(16) 0.0353(15) -0.0018(12) 0.0103(12) 0.0103(13)
 C28B 0.0339(14) 0.0403(15) 0.0374(15) 0.0054(12) 0.0134(12) 0.0094(12)
 C28H 0.0348(15) 0.0460(16) 0.0348(15) 0.0028(12) 0.0124(12) 0.0133(12)
 C19F 0.0287(14) 0.0532(18) 0.0396(16) -0.0144(14) 0.0082(12) 0.0024(13)
 C13H 0.0419(15) 0.0342(14) 0.0336(14) 0.0010(11) 0.0198(12) 0.0074(12)
 C4H 0.0348(15) 0.0463(17) 0.0501(18) 0.0010(14) 0.0138(14) 0.0094(13)
 C14E 0.0415(16) 0.0479(17) 0.0381(15) 0.0043(13) 0.0168(13) 0.0144(13)
 C8D 0.0343(15) 0.0583(19) 0.0354(15) -0.0060(14) 0.0112(13) 0.0051(13)
 C8F 0.0506(18) 0.0476(18) 0.0361(16) -0.0014(13) 0.0090(14) -0.0044(14)
 C18I 0.0357(15) 0.0436(16) 0.0370(15) -0.0108(13) -0.0010(12) 0.0096(12)
 C12E 0.0527(19) 0.0396(16) 0.0384(16) -0.0047(13) 0.0123(14) 0.0077(14)
 C11B 0.0435(16) 0.0376(15) 0.0415(16) -0.0034(12) 0.0120(13) 0.0051(13)
 C20E 0.0325(14) 0.0394(15) 0.0367(15) -0.0046(12) 0.0099(12) 0.0083(12)
 C37 0.0428(16) 0.0400(16) 0.0384(16) -0.0096(13) 0.0005(13) 0.0063(13)
 C22D 0.0475(17) 0.0397(16) 0.0352(15) -0.0052(12) 0.0074(13) 0.0038(13)
 C18B 0.0462(17) 0.0341(14) 0.0359(15) -0.0017(12) 0.0151(13) 0.0026(12)
 C4D 0.0422(16) 0.0436(16) 0.0364(15) -0.0045(12) 0.0096(13) 0.0072(13)
 C25E 0.0323(14) 0.0474(16) 0.0300(14) -0.0053(12) 0.0098(11) 0.0019(12)
 C10D 0.0351(15) 0.0572(19) 0.0310(14) -0.0064(13) 0.0112(12) 0.0054(13)
 C28C 0.0428(16) 0.0363(15) 0.0436(16) -0.0016(13) 0.0078(13) 0.0049(13)
 C25F 0.0369(15) 0.0420(16) 0.0365(15) -0.0031(12) 0.0084(12) 0.0022(12)
 C18C 0.0339(15) 0.0567(19) 0.0340(15) -0.0061(13) 0.0076(12) 0.0083(13)
 C11E 0.0409(16) 0.0401(16) 0.0434(16) -0.0025(13) 0.0089(13) 0.0100(13)
 C30G 0.0456(17) 0.0407(16) 0.0353(15) -0.0070(12) 0.0102(13) -0.0028(13)
 C27D 0.0446(17) 0.0475(17) 0.0385(16) -0.0015(13) 0.0027(13) 0.0004(14)
 C5D 0.0456(17) 0.0428(16) 0.0369(16) -0.0045(13) 0.0055(13) 0.0080(13)
 C7B 0.0424(16) 0.0351(15) 0.0505(18) -0.0032(13) 0.0142(14) 0.0038(12)
 C4E 0.0371(15) 0.0339(15) 0.0555(19) -0.0027(13) 0.0157(14) 0.0057(12)
 C3A 0.0526(18) 0.0324(14) 0.0338(15) -0.0048(11) 0.0097(13) 0.0070(13)
 C29G 0.0448(16) 0.0409(16) 0.0298(14) -0.0039(12) 0.0082(12) 0.0012(13)
 C29D 0.0506(18) 0.0455(17) 0.0308(14) -0.0042(12) 0.0054(13) 0.0047(14)
 C12B 0.0517(18) 0.0374(15) 0.0369(15) -0.0041(12) 0.0109(14) 0.0053(13)
 C6C 0.0409(15) 0.0388(15) 0.0306(14) -0.0043(11) 0.0101(12) 0.0034(12)
 C7C 0.063(2) 0.0384(16) 0.0305(14) -0.0043(12) 0.0069(14) 0.0051(14)
 C9D 0.0361(16) 0.065(2) 0.0371(16) -0.0045(14) 0.0145(13) 0.0086(14)
 C2D 0.0419(16) 0.0477(17) 0.0367(15) -0.0097(13) 0.0146(13) -0.0089(13)
 C18E 0.0509(18) 0.0397(16) 0.0352(15) -0.0007(12) 0.0166(13) 0.0025(13)
 C26G 0.0422(16) 0.0481(17) 0.0311(14) 0.0001(12) 0.0090(12) 0.0037(13)
 C3C 0.0492(18) 0.0387(16) 0.0374(15) -0.0033(12) 0.0077(13) 0.0001(13)
 C29E 0.0422(17) 0.063(2) 0.0349(16) 0.0035(14) 0.0117(13) 0.0118(15)
 C2E 0.0384(16) 0.0368(15) 0.0473(17) -0.0045(13) 0.0115(13) 0.0044(12)
 C9B 0.0441(17) 0.0346(15) 0.0498(18) -0.0057(13) 0.0145(14) 0.0029(13)
 C28E 0.0365(15) 0.0399(15) 0.0391(15) 0.0060(12) 0.0153(12) 0.0081(12)
 C24F 0.0369(16) 0.0481(18) 0.0479(18) -0.0033(14) 0.0128(14) 0.0009(13)
 C7D 0.0330(15) 0.066(2) 0.0365(16) -0.0052(14) 0.0111(13) 0.0042(14)
 C27B 0.0370(15) 0.0386(15) 0.0499(18) -0.0002(13) 0.0152(14) 0.0062(12)
 C17I 0.0367(15) 0.0415(16) 0.0334(14) -0.0116(12) 0.0009(12) 0.0067(12)
 C10A 0.0381(16) 0.0497(17) 0.0385(16) -0.0101(13) 0.0148(13) 0.0002(13)
 C13A 0.0378(16) 0.0573(19) 0.0432(17) -0.0211(15) 0.0183(14) -0.0098(14)
 C14C 0.0337(15) 0.0524(18) 0.0415(16) -0.0129(14) 0.0050(13) 0.0124(13)
 C6F 0.0433(17) 0.0493(18) 0.0352(15) -0.0062(13) 0.0106(13) -0.0017(14)
 C27H 0.0424(17) 0.0410(16) 0.0528(19) 0.0010(14) 0.0207(15) 0.0098(13)
 C30D 0.0495(18) 0.0509(18) 0.0356(16) -0.0077(14) 0.0078(14) -0.0036(15)
 C2H 0.0372(16) 0.0459(17) 0.0553(19) -0.0111(15) 0.0144(14) 0.0055(13)
 C13F 0.0374(16) 0.0500(18) 0.0533(19) -0.0165(15) 0.0092(14) 0.0051(14)
 C17E 0.059(2) 0.0380(16) 0.0353(15) -0.0031(12) 0.0183(14) 0.0108(14)
 C29C 0.0453(17) 0.0402(16) 0.0462(17) -0.0030(13) 0.0100(14) 0.0055(13)
 C16C 0.0274(14) 0.0456(17) 0.0516(18) -0.0227(14) 0.0076(13) 0.0005(12)
 C15A 0.0418(16) 0.0459(17) 0.0399(16) -0.0073(13) 0.0124(13) 0.0038(13)
 C15C 0.0382(16) 0.0503(18) 0.0419(16) -0.0123(14) 0.0062(13) 0.0167(14)
 C8A 0.0411(16) 0.0469(17) 0.0420(17) -0.0067(13) 0.0134(14) 0.0042(13)
 C1D 0.0516(19) 0.0454(17) 0.0414(17) -0.0090(13) 0.0213(15) -0.0117(14)
 C9A 0.0395(16) 0.0565(19) 0.0419(17) -0.0114(14) 0.0126(14) 0.0050(14)
 C29B 0.0398(17) 0.066(2) 0.0381(16) -0.0023(15) 0.0129(14) 0.0092(15)
 C15E 0.0396(16) 0.0460(17) 0.0365(15) -0.0025(13) 0.0145(13) 0.0072(13)
 C15B 0.0465(17) 0.0412(16) 0.0398(16) -0.0081(13) 0.0139(14) 0.0039(13)
 C9F 0.0531(19) 0.0459(18) 0.0365(16) -0.0009(13) 0.0073(14) -0.0029(14)
 C2A 0.0536(19) 0.0408(16) 0.0378(16) -0.0040(13) 0.0151(14) 0.0018(14)
 C17C 0.0351(16) 0.068(2) 0.0371(16) -0.0139(15) 0.0097(13) 0.0098(15)
 C21C 0.0384(16) 0.0377(16) 0.0578(19) -0.0082(14) 0.0187(14) 0.0013(13)
 C30A 0.0471(18) 0.0483(18) 0.0379(16) -0.0080(14) 0.0043(14) 0.0006(14)
 C1E 0.0473(18) 0.0362(15) 0.0472(17) -0.0032(13) 0.0133(14) 0.0110(13)
 C2G 0.0551(19) 0.0434(17) 0.0380(16) -0.0049(13) 0.0194(15) -0.0026(14)
 C14F 0.0324(15) 0.0501(18) 0.0529(19) -0.0050(15) 0.0098(14) 0.0027(13)
 C1B 0.0509(19) 0.0463(18) 0.057(2) -0.0056(15) 0.0134(16) 0.0148(15)
 C28F 0.0429(17) 0.0417(17) 0.0466(17) -0.0043(13) 0.0052(14) 0.0035(13)
 C7A 0.0416(17) 0.0569(19) 0.0396(16) -0.0098(14) 0.0086(14) 0.0093(14)
 C4A 0.055(2) 0.0451(17) 0.0423(17) -0.0053(14) 0.0068(15) 0.0145(15)
 C27A 0.054(2) 0.0508(19) 0.0442(18) 0.0098(15) -0.0040(15) -0.0137(16)
 C26B 0.0353(16) 0.0481(18) 0.068(2) 0.0144(16) 0.0197(15) 0.0103(14)
 C29A 0.0486(18) 0.0427(16) 0.0354(15) -0.0057(13) 0.0009(13) 0.0071(14)
 C4G 0.0525(19) 0.0545(19) 0.0351(16) -0.0035(14) 0.0087(14) 0.0147(15)
 C14D 0.064(2) 0.055(2) 0.0483(19) -0.0125(16) 0.0298(17) -0.0126(17)
 C18D 0.0404(17) 0.0550(19) 0.0443(17) -0.0172(15) 0.0072(14) 0.0028(14)
 C26D 0.0480(18) 0.059(2) 0.0348(16) 0.0025(14) 0.0024(14) 0.0022(15)
 C5I 0.0367(16) 0.0438(17) 0.0532(19) -0.0045(14) 0.0118(14) -0.0019(13)
 C27I 0.0489(18) 0.0383(16) 0.0450(17) -0.0064(13) 0.0071(14) 0.0069(13)
 C11C 0.0336(15) 0.0536(19) 0.0516(19) -0.0144(15) 0.0079(14) 0.0057(14)
 C9C 0.0486(18) 0.0407(16) 0.0345(15) -0.0049(12) 0.0077(13) 0.0061(13)
 C2B 0.0457(18) 0.0393(16) 0.0553(19) -0.0020(14) 0.0159(15) 0.0066(13)
 C18A 0.0382(16) 0.0460(17) 0.0515(19) -0.0133(14) 0.0113(14) 0.0001(13)
 C30E 0.053(2) 0.079(3) 0.0394(17) 0.0119(17) 0.0203(16) 0.0246(19)
 C27E 0.0388(16) 0.0442(17) 0.0535(19) -0.0006(14) 0.0158(14) 0.0062(13)
 C2C 0.0492(18) 0.0462(17) 0.0393(16) -0.0084(13) 0.0117(14) 0.0004(14)
 C26H 0.0403(17) 0.0502(19) 0.066(2) 0.0139(17) 0.0211(16) 0.0114(14)
 C18F 0.0414(17) 0.074(2) 0.0385(17) -0.0036(16) 0.0086(14) 0.0167(16)
 C4C 0.067(2) 0.0466(18) 0.0421(17) -0.0044(14) 0.0163(16) -0.0035(16)
 C4B 0.0441(18) 0.0450(18) 0.059(2) -0.0041(15) 0.0112(15) 0.0077(14)
 C29I 0.0507(18) 0.0452(17) 0.0390(16) -0.0048(13) 0.0078(14) 0.0153(14)
 C17F 0.0387(17) 0.088(3) 0.0403(17) -0.0116(18) 0.0112(14) 0.0130(17)
 C5A 0.074(3) 0.0487(19) 0.0374(17) -0.0052(14) 0.0004(17) 0.0164(17)
 C15F 0.0363(16) 0.0537(19) 0.0478(18) -0.0070(15) 0.0134(14) 0.0066(14)
 C5E 0.0381(16) 0.0431(17) 0.061(2) 0.0001(15) 0.0159(15) 0.0068(13)
 C11A 0.0489(18) 0.0510(19) 0.0475(18) -0.0041(15) 0.0188(15) 0.0041(15)
 C1A 0.067(2) 0.0384(16) 0.0372(16) -0.0047(13) 0.0180(16) 0.0001(15)
 C17A 0.0451(18) 0.0470(18) 0.056(2) -0.0191(15) 0.0195(15) -0.0010(14)
 C1H 0.0460(18) 0.0502(19) 0.054(2) -0.0141(15) 0.0098(15) 0.0137(15)
 C26I 0.072(2) 0.0383(17) 0.0459(18) -0.0019(14) 0.0064(17) 0.0054(16)
 C20F 0.0505(19) 0.0493(19) 0.062(2) -0.0051(16) 0.0245(17) 0.0060(15)
 C30H 0.0434(18) 0.090(3) 0.0350(16) -0.0030(17) 0.0114(14) 0.0217(18)
 C29H 0.0401(17) 0.072(2) 0.0337(15) -0.0072(15) 0.0069(13) 0.0125(16)
 C30B 0.052(2) 0.084(3) 0.0393(18) 0.0010(17) 0.0179(16) 0.0191(19)
 C5H 0.0360(16) 0.055(2) 0.059(2) 0.0000(16) 0.0195(15) 0.0109(14)
 C17D 0.0456(18) 0.056(2) 0.0520(19) -0.0200(16) 0.0178(15) -0.0012(15)
 C12A 0.0455(18) 0.0485(18) 0.0541(19) -0.0093(15) 0.0197(15) -0.0003(14)
 C12C 0.0361(16) 0.0537(19) 0.0547(19) -0.0177(15) 0.0132(14) 0.0069(14)
 C16F 0.0333(16) 0.055(2) 0.059(2) -0.0194(16) 0.0061(15) 0.0059(14)
 C15D 0.056(2) 0.0508(19) 0.0491(19) -0.0135(15) 0.0247(16) -0.0049(15)
 C30C 0.057(2) 0.0480(19) 0.054(2) -0.0054(16) 0.0125(17) 0.0150(16)
 C7F 0.072(2) 0.0468(18) 0.0368(16) -0.0049(14) 0.0114(16) -0.0064(16)
 C29F 0.070(2) 0.050(2) 0.054(2) 0.0029(16) 0.0230(18) 0.0161(17)
 C1G 0.070(2) 0.0428(17) 0.0410(17) -0.0037(14) 0.0273(17) 0.0002(16)
 C30I 0.073(2) 0.050(2) 0.0421(18) -0.0067(15) 0.0079(17) 0.0248(18)
 C5C 0.078(3) 0.056(2) 0.053(2) -0.0017(17) 0.0164(19) -0.0134(19)
 C5G 0.066(2) 0.056(2) 0.0363(17) -0.0058(14) 0.0055(16) 0.0213(17)
 C1C 0.066(2) 0.0487(19) 0.052(2) -0.0140(16) 0.0105(18) -0.0029(17)
 C12D 0.084(3) 0.053(2) 0.062(2) -0.0070(17) 0.045(2) 0.0081(19)
 C26A 0.060(2) 0.066(2) 0.0421(18) 0.0163(16) -0.0058(16) -0.0154(18)
 C26E 0.0393(17) 0.0525(19) 0.068(2) 0.0092(17) 0.0194(16) 0.0091(15)
 C11D 0.088(3) 0.052(2) 0.065(2) 0.0055(17) 0.049(2) 0.0112(19)
 C27C 0.068(2) 0.0406(17) 0.058(2) 0.0038(15) 0.0258(18) 0.0048(16)
 C5B 0.0435(18) 0.054(2) 0.067(2) -0.0042(17) 0.0128(17) 0.0089(15)
 C26C 0.089(3) 0.0396(18) 0.066(2) 0.0058(17) 0.027(2) 0.0069(18)
 C21F 0.051(2) 0.0486(19) 0.073(2) -0.0054(17) 0.0258(18) 0.0057(16)
 C27F 0.056(2) 0.051(2) 0.078(3) 0.0016(18) 0.024(2) 0.0035(17)
 C26F 0.069(3) 0.045(2) 0.097(3) 0.008(2) 0.024(2) 0.0019(18)
 C30F 0.089(3) 0.058(2) 0.062(2) 0.0011(19) 0.028(2) 0.024(2)
 C11F 0.0375(18) 0.091(3) 0.075(3) -0.039(2) 0.0158(18) -0.0069(18)
 C12F 0.0393(19) 0.104(3) 0.084(3) -0.050(3) 0.0221(19) -0.004(2)
 B9 0.0318(17) 0.059(2) 0.0413(19) 0.0034(16) 0.0087(14) 0.0042(15)
 F33 0.0387(10) 0.0772(14) 0.0467(11) 0.0039(9) 0.0161(8) 0.0069(9)
 F34 0.0426(10) 0.0540(11) 0.0436(10) -0.0006(8) 0.0039(8) 0.0008(8)
 F35 0.0562(13) 0.0950(17) 0.0581(13) 0.0098(12) 0.0194(10) 0.0342(12)
 F36 0.0532(12) 0.0776(15) 0.0603(13) -0.0002(11) 0.0022(10) -0.0193(11)
 N1S4 0.0491(17) 0.0501(18) 0.081(2) -0.0081(16) 0.0145(16) -0.0012(14)
 C1S4 0.054(2) 0.058(2) 0.061(2) -0.0120(18) 0.0004(18) 0.0097(17)
 C2S4 0.086(3) 0.053(2) 0.086(3) -0.003(2) 0.000(3) 0.011(2)
 C1S9 0.0454(19) 0.050(2) 0.059(2) -0.0076(16) 0.0125(16) -0.0030(15)
 N1S9 0.0493(17) 0.0501(18) 0.077(2) -0.0033(15) 0.0184(16) -0.0010(14)
 C2S9 0.073(3) 0.052(2) 0.093(3) -0.001(2) 0.012(2) 0.008(2)
 B8 0.041(2) 0.065(3) 0.047(2) -0.0154(18) 0.0085(17) -0.0063(18)
 F31 0.0722(15) 0.0721(14) 0.0525(12) -0.0085(11) 0.0010(11) 0.0030(12)
 F29 0.0405(11) 0.1100(19) 0.0623(14) -0.0338(13) 0.0146(10) 0.0005(11)
 F32 0.0866(17) 0.0716(15) 0.0579(13) -0.0077(11) 0.0049(12) -0.0172(13)
 F30 0.0420(11) 0.0934(16) 0.0519(12) -0.0291(11) 0.0093(9) 0.0002(10)
 B3 0.048(2) 0.046(2) 0.057(2) 0.0037(17) 0.0148(18) 0.0024(16)
 F9 0.0748(15) 0.0498(12) 0.0911(17) 0.0136(11) 0.0500(13) 0.0093(10)
 F12 0.0587(13) 0.0618(13) 0.0893(17) 0.0151(12) 0.0284(12) 0.0161(11)
 F11 0.0815(17) 0.0530(13) 0.111(2) 0.0179(13) 0.0513(16) 0.0044(12)
 F10 0.091(2) 0.118(2) 0.098(2) -0.0414(19) -0.0190(17) 0.0259(18)
 F8 0.0618(13) 0.0626(13) 0.0514(12) 0.0055(10) -0.0004(10) -0.0132(10)
 F7 0.0579(12) 0.0467(11) 0.0703(14) 0.0075(10) 0.0098(10) 0.0032(9)
 F5 0.0614(13) 0.0634(13) 0.0468(11) 0.0022(9) 0.0011(9) -0.0063(10)
 F6 0.0693(15) 0.0709(14) 0.0728(15) 0.0177(12) 0.0221(12) 0.0231(12)
 B2 0.048(2) 0.046(2) 0.050(2) 0.0049(16) 0.0038(17) 0.0016(16)
 F44 0.0476(11) 0.0505(11) 0.0582(12) 0.0083(9) 0.0148(9) 0.0090(8)
 F41 0.0511(11) 0.0540(11) 0.0666(13) 0.0124(10) 0.0252(10) 0.0113(9)
 F42 0.0659(14) 0.0824(15) 0.0447(11) -0.0061(10) 0.0060(10) 0.0115(12)
 F43 0.0643(13) 0.0449(11) 0.0689(13) 0.0032(9) 0.0200(11) 0.0008(9)
 B11 0.0447(19) 0.0456(19) 0.0430(19) 0.0035(15) 0.0117(16) 0.0067(15)
 F14A 0.0417(15) 0.105(6) 0.092(3) -0.058(5) 0.0061(17) 0.000(2)
 F13A 0.038(2) 0.148(6) 0.073(3) -0.056(3) 0.007(2) 0.007(3)
 F16A 0.077(3) 0.066(2) 0.104(4) -0.026(2) 0.038(3) 0.005(2)
 F15A 0.049(2) 0.105(4) 0.101(3) 0.007(3) 0.003(2) 0.018(2)
 B4A 0.041(2) 0.072(3) 0.065(3) -0.026(2) 0.000(2) 0.0035(19)
 B4 0.034(5) 0.047(6) 0.038(6) 0.006(4) 0.005(4) -0.002(4)
 F28 0.051(5) 0.056(7) 0.041(5) 0.006(4) 0.005(4) -0.012(4)
 F19 0.053(7) 0.043(4) 0.068(8) 0.015(3) 0.022(6) -0.002(4)
 F25 0.106(8) 0.059(5) 0.045(3) 0.005(3) 0.020(4) 0.030(5)
 F26 0.038(3) 0.091(8) 0.080(7) 0.046(6) -0.001(3) -0.015(3)
 F21 0.0580(12) 0.0654(13) 0.0525(12) -0.0018(10) 0.0088(10) -0.0134(10)
 F22 0.0744(15) 0.0652(13) 0.0626(13) 0.0069(11) 0.0195(11) 0.0203(11)
 F23 0.0593(13) 0.0477(11) 0.0895(16) 0.0083(11) 0.0263(12) -0.0011(10)
 F24 0.0498(12) 0.0642(13) 0.0697(14) 0.0183(11) 0.0024(10) -0.0076(10)
 B6 0.043(2) 0.046(2) 0.058(2) 0.0066(17) 0.0100(17) 0.0005(16)
 B7A 0.055(7) 0.053(6) 0.069(9) -0.008(6) 0.020(5) 0.007(5)
 F25A 0.088(9) 0.079(9) 0.126(11) 0.028(8) 0.061(8) 0.030(6)
 F28A 0.103(9) 0.112(9) 0.099(9) 0.042(7) 0.054(6) 0.057(8)
 F27A 0.075(6) 0.061(3) 0.107(11) 0.010(4) 0.042(7) 0.007(3)
 F26A 0.105(7) 0.128(10) 0.084(6) -0.033(6) -0.006(4) 0.014(6)
 F2 0.0577(14) 0.105(2) 0.0742(16) 0.0003(14) -0.0085(12) -0.0032(13)
 F1 0.0415(12) 0.111(2) 0.0927(19) -0.0175(16) 0.0184(12) 0.0113(12)
 F3 0.088(2) 0.141(3) 0.096(2) 0.0277(19) 0.0320(17) 0.068(2)
 F4 0.0710(18) 0.125(3) 0.102(2) 0.0037(19) 0.0013(16) -0.0294(17)
 B1 0.042(2) 0.083(3) 0.060(3) 0.004(2) 0.0057(19) 0.015(2)
 F45A 0.0341(18) 0.092(4) 0.056(3) -0.025(2) 0.0141(17) -0.004(2)
 F46A 0.051(3) 0.104(4) 0.069(4) -0.045(3) 0.027(2) -0.034(3)
 F48A 0.101(6) 0.066(3) 0.139(7) -0.027(3) 0.071(5) -0.010(3)
 B12A 0.045(4) 0.061(4) 0.043(3) -0.016(3) 0.009(3) -0.003(3)
 F47A 0.083(3) 0.157(6) 0.083(4) 0.013(3) -0.018(3) 0.008(3)
 N1S1 0.0556(18) 0.0487(18) 0.072(2) -0.0009(15) 0.0150(16) 0.0030(14)
 C1S1 0.0464(18) 0.0470(19) 0.0511(19) -0.0081(15) 0.0102(15) -0.0026(15)
 C2S1 0.111(4) 0.049(2) 0.058(2) -0.0092(18) -0.015(2) 0.016(2)
 N1 0.0530(17) 0.0561(17) 0.0439(16) -0.0109(14) 0.0074(13) -0.0010(14)
 C1 0.0425(17) 0.058(2) 0.0412(17) -0.0126(16) 0.0154(15) -0.0060(15)
 C2 0.063(2) 0.083(3) 0.055(2) 0.015(2) 0.0144(19) 0.003(2)
 N1S8 0.0441(18) 0.102(3) 0.0561(19) 0.0014(18) 0.0141(15) 0.0024(17)
 C1S8 0.047(2) 0.062(2) 0.0460(19) 0.0041(16) 0.0115(16) -0.0030(16)
 C2S8 0.059(2) 0.057(2) 0.062(2) 0.0104(17) 0.0276(18) 0.0133(17)
 N1S5 0.0474(19) 0.105(3) 0.089(3) -0.009(2) 0.0257(19) 0.0043(19)
 C2S5 0.051(2) 0.073(3) 0.072(3) -0.017(2) 0.0207(19) 0.0037(19)
 C1S5 0.0432(19) 0.073(2) 0.059(2) -0.0093(19) 0.0128(17) -0.0015(17)
 N1T6 0.052(2) 0.152(4) 0.056(2) 0.011(2) 0.0117(17) 0.013(2)
 C1T6 0.053(2) 0.121(4) 0.059(2) 0.023(3) 0.011(2) 0.006(2)
 C2T6 0.065(3) 0.146(5) 0.111(4) 0.046(4) 0.038(3) 0.027(3)
 C1T1 0.0470(19) 0.056(2) 0.059(2) 0.0007(17) 0.0068(17) 0.0036(16)
 N1T1 0.066(2) 0.083(3) 0.063(2) -0.0078(18) -0.0028(18) 0.0080(19)
 C2T1 0.087(3) 0.078(3) 0.064(3) 0.000(2) -0.001(2) -0.010(2)
 C1S2 0.061(2) 0.068(2) 0.062(2) 0.0133(19) 0.028(2) 0.0034(19)
 C2S2 0.081(3) 0.059(2) 0.088(3) 0.003(2) 0.033(3) -0.003(2)
 N1S2 0.085(3) 0.136(4) 0.080(3) 0.006(3) 0.031(3) -0.022(3)
 N1T9 0.081(3) 0.087(3) 0.078(3) -0.026(2) 0.037(2) -0.018(2)
 C1T9 0.076(4) 0.074(3) 0.146(6) -0.018(3) 0.053(4) -0.017(3)
 C2T9 0.096(5) 0.107(5) 0.310(12) 0.058(6) 0.089(6) 0.013(4)
 O1EW 0.068(2) 0.064(2) 0.044(2) -0.0036(17) 0.0099(17) 0.0012(19)
 C4EW 0.056(5) 0.072(6) 0.077(4) 0.002(5) 0.006(4) 0.008(4)
 C2EW 0.074(4) 0.046(3) 0.045(3) 0.000(2) 0.016(3) 0.008(3)
 C1EW 0.069(6) 0.071(7) 0.042(6) 0.002(4) 0.018(4) 0.014(5)
 C3EW 0.074(4) 0.049(3) 0.061(3) -0.004(3) -0.001(3) 0.003(3)
 N1S7 0.060(2) 0.083(3) 0.123(4) -0.007(2) -0.019(2) 0.002(2)
 C1S7 0.090(4) 0.070(3) 0.062(3) 0.012(2) 0.015(2) 0.017(3)
 C2S7 0.060(2) 0.089(3) 0.079(3) 0.032(2) 0.021(2) 0.018(2)
 C2T4 0.054(2) 0.064(2) 0.055(2) 0.0133(17) 0.0119(17) 0.0123(18)
 C1T4 0.077(3) 0.053(2) 0.048(2) 0.0065(16) 0.0001(18) 0.008(2)
 N1T4 0.136(4) 0.066(3) 0.089(3) 0.019(2) -0.020(3) -0.026(3)
 O1EU 0.091(3) 0.127(3) 0.092(3) 0.001(2) 0.011(2) -0.006(2)
 C3EU 0.126(6) 0.205(8) 0.063(3) 0.032(4) 0.026(3) 0.044(6)
 C1EU 0.068(3) 0.086(3) 0.122(5) 0.001(3) 0.014(3) 0.019(3)
 C2EU 0.064(3) 0.132(5) 0.126(5) -0.021(4) -0.006(3) 0.010(3)
 C4EU 0.095(4) 0.154(6) 0.091(4) 0.019(4) 0.032(3) 0.019(4)
 N1S3 0.112(4) 0.066(2) 0.099(3) 0.009(2) 0.025(3) 0.007(2)
 C1S3 0.068(3) 0.051(2) 0.081(3) -0.004(2) 0.010(2) 0.0057(19)
 C2S3 0.074(3) 0.060(3) 0.112(4) -0.013(2) 0.035(3) -0.002(2)
 N1S6 0.071(3) 0.129(4) 0.102(4) -0.016(3) 0.003(2) -0.011(3)
 C2S6 0.058(3) 0.099(4) 0.085(3) 0.026(3) 0.012(2) 0.017(2)
 C1S6 0.061(3) 0.077(3) 0.072(3) -0.001(2) -0.002(2) 0.004(2)
 B5A 0.033(3) 0.106(6) 0.080(5) 0.036(5) 0.017(3) 0.008(3)
 F17A 0.060(3) 0.115(4) 0.067(3) 0.031(3) 0.022(2) 0.021(3)
 F19A 0.110(5) 0.121(5) 0.185(7) 0.053(5) 0.028(5) 0.040(4)
 F20A 0.089(3) 0.158(6) 0.070(3) -0.015(3) 0.035(3) -0.065(4)
 F18A 0.043(2) 0.179(6) 0.093(4) -0.029(4) 0.013(2) -0.007(3)
 B5B 0.068(8) 0.150(12) 0.087(8) 0.042(9) 0.002(6) -0.013(7)
 F17B 0.068(5) 0.172(10) 0.112(8) 0.045(7) 0.015(5) -0.009(5)
 F19B 0.083(6) 0.240(15) 0.168(10) 0.052(10) 0.031(7) 0.062(8)
 F20B 0.163(10) 0.209(12) 0.133(9) 0.059(9) -0.017(8) -0.099(9)
 F18B 0.111(7) 0.148(10) 0.106(7) 0.024(6) 0.004(5) -0.013(6)
 B7B 0.059(6) 0.051(5) 0.049(5) 0.013(4) 0.021(4) 0.006(4)
 F25B 0.058(4) 0.045(4) 0.081(5) 0.004(4) 0.037(4) 0.008(3)
 F28B 0.065(4) 0.056(4) 0.062(4) 0.011(3) 0.026(4) 0.013(3)
 F27B 0.072(3) 0.067(3) 0.137(12) -0.002(4) 0.008(5) -0.005(2)
 F26B 0.082(5) 0.164(13) 0.047(4) 0.025(5) 0.020(3) 0.044(6)
 F16B 0.075(7) 0.125(11) 0.069(6) -0.045(6) 0.010(5) -0.027(7)
 F14B 0.0417(15) 0.105(6) 0.092(3) -0.058(5) 0.0061(17) 0.000(2)
 B4B 0.041(2) 0.072(3) 0.065(3) -0.026(2) 0.000(2) 0.0035(19)
 F13B 0.153(15) 0.152(15) 0.060(6) 0.020(8) 0.013(7) 0.000(10)
 F15B 0.042(4) 0.090(5) 0.137(10) -0.007(6) 0.010(5) 0.012(4)
 B2A 0.046(5) 0.040(5) 0.040(6) 0.002(4) 0.016(4) -0.001(4)
 F23A 0.044(4) 0.040(4) 0.037(4) 0.000(4) 0.009(3) 0.000(3)
 F24A 0.049(6) 0.050(5) 0.054(4) 0.012(4) 0.012(4) -0.004(4)
 F20 0.137(12) 0.050(3) 0.041(4) -0.010(3) -0.005(5) 0.003(5)
 F15 0.044(3) 0.107(9) 0.094(9) 0.051(7) 0.018(4) 0.015(4)
 B12B 0.040(6) 0.127(14) 0.080(10) -0.068(9) 0.008(7) -0.004(8)
 F47B 0.107(10) 0.23(2) 0.094(9) -0.080(10) 0.047(8) -0.042(11)
 F46B 0.039(4) 0.157(14) 0.082(9) -0.076(8) 0.015(5) 0.000(6)
 F48B 0.072(9) 0.211(18) 0.119(11) -0.127(13) 0.051(8) -0.083(11)
 F45B 0.094(9) 0.175(13) 0.28(3) -0.026(12) 0.022(15) 0.053(9)
 N1T3 0.046(5) 0.072(6) 0.055(4) -0.002(4) -0.001(4) 0.005(4)
 N1T5 0.085(8) 0.086(8) 0.065(7) 0.005(6) 0.015(6) -0.001(6)
 C2T3 0.072(9) 0.080(9) 0.059(6) 0.005(6) 0.014(6) 0.005(7)
 C1T5 0.104(14) 0.074(11) 0.055(10) 0.004(7) 0.028(8) -0.004(8)
 C2T5 0.101(18) 0.060(10) 0.074(17) 0.005(10) 0.028(10) 0.000(11)
 C1T3 0.056(5) 0.072(6) 0.077(4) 0.002(5) 0.006(4) 0.008(4)
 N1I 0.0430(15) 0.0400(14) 0.0505(16) -0.0095(12) 0.0044(12) -0.0021(11)

_geom_special_details
;
 All esds (except the esd in the dihedral angle between two l.s. planes)
 are estimated using the full covariance matrix.  The cell esds are taken
 into account individually in the estimation of esds in distances, angles
 and torsion angles; correlations between esds in cell parameters are only
 used when they are defined by crystal symmetry.  An approximate (isotropic)
 treatment of cell esds is used for estimating esds involving l.s. planes.
;
loop_
  _geom_bond_atom_site_label_1
  _geom_bond_atom_site_label_2
  _geom_bond_distance
  _geom_bond_site_symmetry_2
  _geom_bond_publ_flag
 Cu2 N5B 2.053(2) . ?
 Cu2 N6A 1.991(2) . ?
 Cu2 N6B 2.013(2) . ?
 Cu2 N5C 2.066(2) . ?
 Cu2 N6C 2.252(2) . ?
 Cu5 N4H 2.092(2) . ?
 Cu5 N4G 2.050(2) . ?
 Cu5 N3H 1.989(2) . ?
 Cu5 N3I 2.032(2) . ?
 Cu5 N3G 2.352(2) . ?
 Cu6 N5H 2.092(2) . ?
 Cu6 N6H 2.001(2) . ?
 Cu6 N6G 2.055(2) . ?
 Cu6 N5I 2.063(2) . ?
 Cu6 N6I 2.240(2) . ?
 Cu4 N5E 2.045(2) . ?
 Cu4 N6D 1.989(2) . ?
 Cu4 N6E 2.008(2) . ?
 Cu4 N5F 2.057(3) . ?
 Cu4 N6F 2.261(3) . ?
 Cu3 N3E 2.008(2) . ?
 Cu3 N3D 2.053(3) . ?
 Cu3 N4E 2.452(3) . ?
 Cu3 N4D 2.064(3) . ?
 Cu3 N4F 2.062(3) . ?
 Cu3 N3F 2.381(3) . ?
 Cu1 N3A 2.006(3) . ?
 Cu1 N3B 2.031(3) . ?
 Cu1 N4C 2.042(3) . ?
 Cu1 N3C 2.371(3) . ?
 Cu1 N4B 2.426(3) . ?
 Cu1 N4A 2.094(3) . ?
 O1I C13I 1.404(3) . ?
 O1I C16I 1.389(3) . ?
 O1G C16G 1.395(3) . ?
 O1G C13G 1.384(3) . ?
 O1H C16H 1.389(3) . ?
 O1H C13H 1.405(3) . ?
 O1B C16B 1.393(3) . ?
 O1B C13B 1.405(3) . ?
 O1E C16E 1.387(3) . ?
 O1E C13E 1.400(3) . ?
 O1A C16A 1.397(4) . ?
 O1A C13A 1.396(4) . ?
 O1D C13D 1.396(4) . ?
 O1D C16D 1.404(3) . ?
 N5B C22B 1.286(4) . ?
 N5B C19B 1.436(3) . ?
 O1C C13C 1.392(4) . ?
 O1C C16C 1.393(3) . ?
 N5H C22H 1.285(4) . ?
 N5H C19H 1.431(3) . ?
 N4H C10H 1.439(3) . ?
 N4H C9H 1.288(4) . ?
 N6H C23H 1.391(4) . ?
 N6H C25H 1.311(4) . ?
 N4G C9G 1.284(4) . ?
 N4G C10G 1.438(3) . ?
 N3H C8H 1.383(4) . ?
 N3H C6H 1.307(4) . ?
 N7A C24A 1.385(4) . ?
 N7A C28A 1.430(4) . ?
 N7A C25A 1.364(4) . ?
 N7D C28D 1.422(4) . ?
 N7D C25D 1.368(4) . ?
 N7D C24D 1.388(4) . ?
 N6A C23A 1.394(4) . ?
 N6A C25A 1.316(4) . ?
 N6G C23G 1.389(4) . ?
 N6G C25G 1.315(4) . ?
 N5E C22E 1.289(4) . ?
 N5E C19E 1.434(3) . ?
 N2H C3H 1.433(3) . ?
 N2H C6H 1.375(4) . ?
 N2H C7H 1.378(4) . ?
 N6B C23B 1.394(4) . ?
 N6B C25B 1.304(4) . ?
 N7H C24H 1.387(4) . ?
 N7H C25H 1.363(4) . ?
 N7H C28H 1.430(4) . ?
 N6D C25D 1.311(4) . ?
 N6D C23D 1.391(4) . ?
 N3I C8I 1.390(4) . ?
 N3I C6I 1.319(4) . ?
 N7I C25I 1.367(4) . ?
 N7I C28I 1.423(4) . ?
 N7I C24I 1.365(4) . ?
 N2G C3G 1.431(4) . ?
 N2G C6G 1.378(4) . ?
 N2G C7G 1.372(4) . ?
 N2D C6D 1.375(4) . ?
 N2D C3D 1.433(4) . ?
 N2D C7D 1.374(4) . ?
 N2I C6I 1.366(4) . ?
 N2I C7I 1.379(4) . ?
 N2I C3I 1.423(4) . ?
 N7G C24G 1.381(4) . ?
 N7G C25G 1.360(4) . ?
 N7G C28G 1.426(4) . ?
 N7E C24E 1.375(4) . ?
 N7E C25E 1.364(4) . ?
 N7E C28E 1.428(4) . ?
 N6E C23E 1.387(4) . ?
 N6E C25E 1.307(4) . ?
 N3E C8E 1.383(4) . ?
 N3E C6E 1.313(4) . ?
 N7B C25B 1.375(4) . ?
 N7B C24B 1.384(4) . ?
 N7B C28B 1.423(4) . ?
 N5I C22I 1.288(4) . ?
 N5I C19I 1.436(3) . ?
 N4I C10I 1.426(3) . ?
 N4I C9I 1.270(4) . ?
 N6I C23I 1.388(4) . ?
 N6I C25I 1.310(4) . ?
 N7C C24C 1.378(4) . ?
 N7C C25C 1.369(4) . ?
 N7C C28C 1.425(4) . ?
 N5C C22C 1.286(4) . ?
 N5C C19C 1.435(4) . ?
 N2C C6C 1.379(4) . ?
 N2C C7C 1.369(4) . ?
 N2C C3C 1.432(4) . ?
 N2E C3E 1.421(4) . ?
 N2E C6E 1.371(4) . ?
 N2E C7E 1.381(4) . ?
 N3D C6D 1.309(4) . ?
 N3D C8D 1.385(4) . ?
 N3A C6A 1.302(4) . ?
 N3A C8A 1.385(4) . ?
 N2A C6A 1.369(4) . ?
 N2A C3A 1.437(4) . ?
 N2A C7A 1.375(4) . ?
 O1F C13F 1.399(4) . ?
 O1F C16F 1.408(4) . ?
 N4E C10E 1.424(4) . ?
 N4E C9E 1.278(4) . ?
 N3G C8G 1.385(4) . ?
 N3G C6G 1.304(4) . ?
 N7F C25F 1.371(4) . ?
 N7F C24F 1.376(4) . ?
 N7F C28F 1.425(4) . ?
 N3B C6B 1.313(4) . ?
 N3B C8B 1.386(4) . ?
 N2B C6B 1.374(4) . ?
 N2B C3B 1.426(4) . ?
 N2B C7B 1.374(4) . ?
 N4D C10D 1.445(4) . ?
 N4D C9D 1.277(4) . ?
 N4F C10F 1.445(4) . ?
 N4F C9F 1.277(4) . ?
 N5F C22F 1.285(4) . ?
 N5F C19F 1.436(4) . ?
 N5G C19G 1.422(4) . ?
 N5G C22G 1.278(4) . ?
 N6C C23C 1.385(4) . ?
 N6C C25C 1.304(4) . ?
 N8G C30G 1.336(4) . ?
 N8G C26G 1.339(4) . ?
 N5A C19A 1.423(4) . ?
 N5A C22A 1.268(4) . ?
 N4C C10C 1.448(4) . ?
 N4C C9C 1.270(4) . ?
 N3C C8C 1.385(4) . ?
 N3C C6C 1.305(4) . ?
 N4B C10B 1.419(4) . ?
 N4B C9B 1.286(4) . ?
 N4A C10A 1.435(4) . ?
 N4A C9A 1.285(4) . ?
 N6F C23F 1.384(4) . ?
 N6F C25F 1.306(4) . ?
 N8D C30D 1.333(4) . ?
 N8D C26D 1.332(4) . ?
 N3F C8F 1.392(4) . ?
 N3F C6F 1.300(4) . ?
 N5D C19D 1.419(4) . ?
 N5D C22D 1.274(4) . ?
 N1E C1E 1.336(4) . ?
 N1E C5E 1.332(4) . ?
 N8A C30A 1.325(4) . ?
 N8A C26A 1.332(5) . ?
 C23H C22H 1.435(4) . ?
 C23H C24H 1.361(4) . ?
 N2F C6F 1.378(4) . ?
 N2F C7F 1.366(4) . ?
 N2F C3F 1.436(5) . ?
 C13I C14I 1.380(4) . ?
 C13I C12I 1.383(4) . ?
 N1D C5D 1.334(4) . ?
 N1D C1D 1.329(4) . ?
 C23E C22E 1.440(4) . ?
 C23E C24E 1.360(4) . ?
 C10H C15H 1.389(4) . ?
 C10H C11H 1.391(4) . ?
 C22H H22H 0.9500 . ?
 C8H C9H 1.435(4) . ?
 C8H C7H 1.360(4) . ?
 C23B C22B 1.442(4) . ?
 C23B C24B 1.362(4) . ?
 N1B C1B 1.336(5) . ?
 N1B C5B 1.332(5) . ?
 C22E H22E 0.9500 . ?
 C11G H11G 0.9500 . ?
 C11G C10G 1.385(4) . ?
 C11G C12G 1.391(4) . ?
 C9G H9G 0.9500 . ?
 C9G C8G 1.440(4) . ?
 C21G H21G 0.9500 . ?
 C21G C16G 1.379(4) . ?
 C21G C20G 1.394(4) . ?
 C10G C15G 1.389(4) . ?
 C19H C18H 1.384(4) . ?
 C19H C20H 1.392(4) . ?
 C23C C22C 1.436(4) . ?
 C23C C24C 1.362(4) . ?
 C8G C7G 1.364(4) . ?
 C16G C17G 1.380(4) . ?
 C16H C17H 1.384(4) . ?
 C16H C21H 1.388(4) . ?
 C24G H24G 0.9500 . ?
 C24G C23G 1.364(4) . ?
 C15I H15I 0.9500 . ?
 C15I C10I 1.391(4) . ?
 C15I C14I 1.390(4) . ?
 N1H C1H 1.343(5) . ?
 N1H C5H 1.333(5) . ?
 C22B H22B 0.9500 . ?
 C17H H17H 0.9500 . ?
 C17H C18H 1.396(4) . ?
 C23I C22I 1.445(4) . ?
 C23I C24I 1.361(4) . ?
 C16I C21I 1.388(4) . ?
 C16I C17I 1.383(4) . ?
 N8E C30E 1.332(5) . ?
 N8E C26E 1.338(5) . ?
 N8B C26B 1.331(5) . ?
 N8B C30B 1.330(5) . ?
 C23G C22G 1.440(4) . ?
 C9H H9H 0.9500 . ?
 C21B H21B 0.9500 . ?
 C21B C16B 1.386(4) . ?
 C21B C20B 1.385(4) . ?
 C18H H18H 0.9500 . ?
 N1A C5A 1.334(5) . ?
 N1A C1A 1.332(5) . ?
 C8I C7I 1.357(4) . ?
 C8I C9I 1.446(4) . ?
 N8I C26I 1.346(5) . ?
 N8I C30I 1.335(5) . ?
 C25G H25G 0.9500 . ?
 C24H H24H 0.9500 . ?
 C11I H11I 0.9500 . ?
 C11I C10I 1.393(4) . ?
 C11I C12I 1.389(4) . ?
 C23A C24A 1.354(4) . ?
 C23A C22A 1.461(4) . ?
 C20I H20I 0.9500 . ?
 C20I C19I 1.385(4) . ?
 C20I C21I 1.385(4) . ?
 C24A H24A 0.9500 . ?
 C28A C27A 1.384(5) . ?
 C28A C29A 1.385(4) . ?
 C24E H24E 0.9500 . ?
 C22C H22C 0.9500 . ?
 C16B C17B 1.384(4) . ?
 N8H C26H 1.330(5) . ?
 N8H C30H 1.331(5) . ?
 C28D C27D 1.373(4) . ?
 C28D C29D 1.384(4) . ?
 C21H H21H 0.9500 . ?
 C21H C20H 1.384(4) . ?
 C20B H20B 0.9500 . ?
 C20B C19B 1.387(4) . ?
 C8E C9E 1.448(4) . ?
 C8E C7E 1.354(4) . ?
 C8C C7C 1.358(4) . ?
 C8C C9C 1.446(4) . ?
 C25B H25B 0.9500 . ?
 C28G C27G 1.380(4) . ?
 C28G C29G 1.384(4) . ?
 C6I H6I 0.9500 . ?
 C15H H15H 0.9500 . ?
 C15H C14H 1.394(4) . ?
 C19A C20A 1.387(4) . ?
 C19A C18A 1.389(4) . ?
 C14G H14G 0.9500 . ?
 C14G C15G 1.380(4) . ?
 C14G C13G 1.394(4) . ?
 C24C H24C 0.9500 . ?
 C21E H21E 0.9500 . ?
 C21E C16E 1.386(4) . ?
 C21E C20E 1.388(4) . ?
 C14I H14I 0.9500 . ?
 C6D H6D 0.9500 . ?
 N8C C30C 1.334(5) . ?
 N8C C26C 1.341(5) . ?
 C3G C2G 1.388(5) . ?
 C3G C4G 1.385(5) . ?
 C19G C20G 1.389(4) . ?
 C19G C18G 1.395(4) . ?
 C7I H7I 0.9500 . ?
 C25D H25D 0.9500 . ?
 C16A C21A 1.372(4) . ?
 C16A C17A 1.380(5) . ?
 C3H C4H 1.384(4) . ?
 C3H C2H 1.376(4) . ?
 C6B H6B 0.9500 . ?
 C24B H24B 0.9500 . ?
 C19B C18B 1.384(4) . ?
 C20H H20H 0.9500 . ?
 C6H H6H 0.9500 . ?
 C27G H27G 0.9500 . ?
 C27G C26G 1.379(4) . ?
 C21A H21A 0.9500 . ?
 C21A C20A 1.392(4) . ?
 C15G H15G 0.9500 . ?
 C3E C4E 1.385(4) . ?
 C3E C2E 1.386(4) . ?
 C10E C11E 1.392(4) . ?
 C10E C15E 1.385(4) . ?
 C12I H12I 0.9500 . ?
 N1G C1G 1.338(5) . ?
 N1G C5G 1.341(5) . ?
 C11H H11H 0.9500 . ?
 C11H C12H 1.393(4) . ?
 C25A H25A 0.9500 . ?
 C20D H20D 0.9500 . ?
 C20D C21D 1.394(4) . ?
 C20D C19D 1.383(4) . ?
 C10B C11B 1.394(4) . ?
 C10B C15B 1.391(5) . ?
 C22I H22I 0.9500 . ?
 C25H H25H 0.9500 . ?
 C2I H2I 0.9500 . ?
 C2I C3I 1.377(4) . ?
 C2I C37 1.392(4) . ?
 C13D C14D 1.368(5) . ?
 C13D C12D 1.359(5) . ?
 C25I H25I 0.9500 . ?
 C6E H6E 0.9500 . ?
 C7H H7H 0.9500 . ?
 C20A H20A 0.9500 . ?
 C22G H22G 0.9500 . ?
 C20G H20G 0.9500 . ?
 C6G H6G 0.9500 . ?
 C9I H9I 0.9500 . ?
 C21D H21D 0.9500 . ?
 C21D C16D 1.366(5) . ?
 C16E C17E 1.380(4) . ?
 C3D C4D 1.387(4) . ?
 C3D C2D 1.378(4) . ?
 C22A H22A 0.9500 . ?
 C13G C12G 1.379(4) . ?
 C8B C7B 1.364(4) . ?
 C8B C9B 1.442(4) . ?
 C10C C15C 1.383(4) . ?
 C10C C11C 1.387(4) . ?
 C19I C18I 1.387(4) . ?
 C28I C27I 1.385(5) . ?
 C28I C29I 1.388(4) . ?
 C17B H17B 0.9500 . ?
 C17B C18B 1.392(4) . ?
 C17G H17G 0.9500 . ?
 C17G C18G 1.383(4) . ?
 C23D C24D 1.360(4) . ?
 C23D C22D 1.457(4) . ?
 C24D H24D 0.9500 . ?
 C25C H25C 0.9500 . ?
 C19C C20C 1.383(5) . ?
 C19C C18C 1.399(4) . ?
 C9E H9E 0.9500 . ?
 C22F H22F 0.9500 . ?
 C22F C23F 1.447(4) . ?
 C19E C20E 1.385(4) . ?
 C19E C18E 1.382(4) . ?
 C3I C4I 1.391(4) . ?
 C4I H4I 0.9500 . ?
 C4I C5I 1.382(4) . ?
 C12G H12G 0.9500 . ?
 C13B C14B 1.385(4) . ?
 C13B C12B 1.370(5) . ?
 C21I H21I 0.9500 . ?
 C12H H12H 0.9500 . ?
 C12H C13H 1.379(4) . ?
 N8F C26F 1.343(6) . ?
 N8F C30F 1.314(5) . ?
 C10F C15F 1.376(4) . ?
 C10F C11F 1.369(5) . ?
 C14B H14B 0.9500 . ?
 C14B C15B 1.393(4) . ?
 C16D C17D 1.377(5) . ?
 C13C C14C 1.374(4) . ?
 C13C C12C 1.388(4) . ?
 C23F C24F 1.363(5) . ?
 C14H H14H 0.9500 . ?
 C14H C13H 1.384(4) . ?
 C7G H7G 0.9500 . ?
 C14A H14A 0.9500 . ?
 C14A C13A 1.397(5) . ?
 C14A C15A 1.390(4) . ?
 C18G H18G 0.9500 . ?
 C13E C14E 1.386(5) . ?
 C13E C12E 1.374(5) . ?
 C20C H20C 0.9500 . ?
 C20C C21C 1.394(4) . ?
 C7E H7E 0.9500 . ?
 C19D C18D 1.387(4) . ?
 N1C C5C 1.333(5) . ?
 N1C C1C 1.341(5) . ?
 C24I H24I 0.9500 . ?
 C6A H6A 0.9500 . ?
 C3B C2B 1.383(4) . ?
 C3B C4B 1.372(5) . ?
 C28B C27B 1.387(4) . ?
 C28B C29B 1.384(4) . ?
 C28H C27H 1.379(5) . ?
 C28H C29H 1.394(4) . ?
 C19F C18F 1.386(5) . ?
 C19F C20F 1.380(5) . ?
 C4H H4H 0.9500 . ?
 C4H C5H 1.390(4) . ?
 C14E H14E 0.9500 . ?
 C14E C15E 1.395(4) . ?
 C8D C9D 1.447(4) . ?
 C8D C7D 1.350(4) . ?
 C8F C9F 1.439(4) . ?
 C8F C7F 1.363(5) . ?
 C18I H18I 0.9500 . ?
 C18I C17I 1.384(4) . ?
 C12E H12E 0.9500 . ?
 C12E C11E 1.386(4) . ?
 C11B H11B 0.9500 . ?
 C11B C12B 1.386(4) . ?
 C20E H20E 0.9500 . ?
 C37 H37 0.9500 . ?
 C37 N1I 1.338(4) . ?
 C22D H22D 0.9500 . ?
 C18B H18B 0.9500 . ?
 C4D H4D 0.9500 . ?
 C4D C5D 1.382(4) . ?
 C25E H25E 0.9500 . ?
 C10D C15D 1.379(5) . ?
 C10D C11D 1.370(5) . ?
 C28C C29C 1.390(4) . ?
 C28C C27C 1.387(5) . ?
 C25F H25F 0.9500 . ?
 C18C H18C 0.9500 . ?
 C18C C17C 1.398(4) . ?
 C11E H11E 0.9500 . ?
 C30G H30G 0.9500 . ?
 C30G C29G 1.392(4) . ?
 C27D H27D 0.9500 . ?
 C27D C26D 1.389(4) . ?
 C5D H5D 0.9500 . ?
 C7B H7B 0.9500 . ?
 C4E H4E 0.9500 . ?
 C4E C5E 1.383(4) . ?
 C3A C2A 1.386(5) . ?
 C3A C4A 1.381(5) . ?
 C29G H29G 0.9500 . ?
 C29D H29D 0.9500 . ?
 C29D C30D 1.381(4) . ?
 C12B H12B 0.9500 . ?
 C6C H6C 0.9500 . ?
 C7C H7C 0.9500 . ?
 C9D H9D 0.9500 . ?
 C2D H2D 0.9500 . ?
 C2D C1D 1.388(4) . ?
 C18E H18E 0.9500 . ?
 C18E C17E 1.396(4) . ?
 C26G H26G 0.9500 . ?
 C3C C2C 1.375(4) . ?
 C3C C4C 1.385(5) . ?
 C29E H29E 0.9500 . ?
 C29E C28E 1.383(4) . ?
 C29E C30E 1.382(5) . ?
 C2E H2E 0.9500 . ?
 C2E C1E 1.384(4) . ?
 C9B H9B 0.9500 . ?
 C28E C27E 1.382(5) . ?
 C24F H24F 0.9500 . ?
 C7D H7D 0.9500 . ?
 C27B H27B 0.9500 . ?
 C27B C26B 1.394(4) . ?
 C17I H17I 0.9500 . ?
 C10A C15A 1.393(5) . ?
 C10A C11A 1.398(5) . ?
 C13A C12A 1.386(5) . ?
 C14C H14C 0.9500 . ?
 C14C C15C 1.379(4) . ?
 C6F H6F 0.9500 . ?
 C27H H27H 0.9500 . ?
 C27H C26H 1.391(5) . ?
 C30D H30D 0.9500 . ?
 C2H H2H 0.9500 . ?
 C2H C1H 1.386(4) . ?
 C13F C14F 1.375(4) . ?
 C13F C12F 1.373(5) . ?
 C17E H17E 0.9500 . ?
 C29C H29C 0.9500 . ?
 C29C C30C 1.382(5) . ?
 C16C C17C 1.372(5) . ?
 C16C C21C 1.377(5) . ?
 C15A H15A 0.9500 . ?
 C15C H15C 0.9500 . ?
 C8A C9A 1.436(4) . ?
 C8A C7A 1.357(5) . ?
 C1D H1D 0.9500 . ?
 C9A H9A 0.9500 . ?
 C29B H29B 0.9500 . ?
 C29B C30B 1.377(5) . ?
 C15E H15E 0.9500 . ?
 C15B H15B 0.9500 . ?
 C9F H9F 0.9500 . ?
 C2A H2A 0.9500 . ?
 C2A C1A 1.386(4) . ?
 C17C H17C 0.9500 . ?
 C21C H21C 0.9500 . ?
 C30A H30A 0.9500 . ?
 C30A C29A 1.389(4) . ?
 C1E H1E 0.9500 . ?
 C2G H2G 0.9500 . ?
 C2G C1G 1.385(5) . ?
 C14F H14F 0.9500 . ?
 C14F C15F 1.382(5) . ?
 C1B H1B 0.9500 . ?
 C1B C2B 1.393(5) . ?
 C28F C29F 1.378(5) . ?
 C28F C27F 1.383(5) . ?
 C7A H7A 0.9500 . ?
 C4A H4A 0.9500 . ?
 C4A C5A 1.389(5) . ?
 C27A H27A 0.9500 . ?
 C27A C26A 1.388(5) . ?
 C26B H26B 0.9500 . ?
 C29A H29A 0.9500 . ?
 C4G H4G 0.9500 . ?
 C4G C5G 1.389(4) . ?
 C14D H14D 0.9500 . ?
 C14D C15D 1.395(5) . ?
 C18D H18D 0.9500 . ?
 C18D C17D 1.393(4) . ?
 C26D H26D 0.9500 . ?
 C5I H5I 0.9500 . ?
 C5I N1I 1.344(4) . ?
 C27I H27I 0.9500 . ?
 C27I C26I 1.395(4) . ?
 C11C H11C 0.9500 . ?
 C11C C12C 1.392(4) . ?
 C9C H9C 0.9500 . ?
 C2B H2B 0.9500 . ?
 C18A H18A 0.9500 . ?
 C18A C17A 1.399(4) . ?
 C30E H30E 0.9500 . ?
 C27E H27E 0.9500 . ?
 C27E C26E 1.381(5) . ?
 C2C H2C 0.9500 . ?
 C2C C1C 1.384(5) . ?
 C26H H26H 0.9500 . ?
 C18F H18F 0.9500 . ?
 C18F C17F 1.397(5) . ?
 C4C H4C 0.9500 . ?
 C4C C5C 1.382(5) . ?
 C4B H4B 0.9500 . ?
 C4B C5B 1.389(5) . ?
 C29I H29I 0.9500 . ?
 C29I C30I 1.378(5) . ?
 C17F H17F 0.9500 . ?
 C17F C16F 1.376(6) . ?
 C5A H5A 0.9500 . ?
 C15F H15F 0.9500 . ?
 C5E H5E 0.9500 . ?
 C11A H11A 0.9500 . ?
 C11A C12A 1.396(5) . ?
 C1A H1A 0.9500 . ?
 C17A H17A 0.9500 . ?
 C1H H1H 0.9500 . ?
 C26I H26I 0.9500 . ?
 C20F H20F 0.9500 . ?
 C20F C21F 1.397(5) . ?
 C30H H30H 0.9500 . ?
 C30H C29H 1.380(5) . ?
 C29H H29H 0.9500 . ?
 C30B H30B 0.9500 . ?
 C5H H5H 0.9500 . ?
 C17D H17D 0.9500 . ?
 C12A H12A 0.9500 . ?
 C12C H12C 0.9500 . ?
 C16F C21F 1.359(5) . ?
 C15D H15D 0.9500 . ?
 C30C H30C 0.9500 . ?
 C7F H7F 0.9500 . ?
 C29F H29F 0.9500 . ?
 C29F C30F 1.387(5) . ?
 C1G H1G 0.9500 . ?
 C30I H30I 0.9500 . ?
 C5C H5C 0.9500 . ?
 C5G H5G 0.9500 . ?
 C1C H1C 0.9500 . ?
 C12D H12D 0.9500 . ?
 C12D C11D 1.390(5) . ?
 C26A H26A 0.9500 . ?
 C26E H26E 0.9500 . ?
 C11D H11D 0.9500 . ?
 C27C H27C 0.9500 . ?
 C27C C26C 1.384(5) . ?
 C5B H5B 0.9500 . ?
 C26C H26C 0.9500 . ?
 C21F H21F 0.9500 . ?
 C27F H27F 0.9500 . ?
 C27F C26F 1.379(5) . ?
 C26F H26F 0.9500 . ?
 C30F H30F 0.9500 . ?
 C11F H11F 0.9500 . ?
 C11F C12F 1.388(5) . ?
 C12F H12F 0.9500 . ?
 C3F C2F 1.348(5) . ?
 C3F C4F 1.376(6) . ?
 C1F H1F 0.9500 . ?
 C1F N1F 1.306(6) . ?
 C1F C2F 1.383(5) . ?
 N1F C5F 1.356(7) . ?
 C2F H2F 0.9500 . ?
 B9 F33 1.395(4) . ?
 B9 F34 1.396(4) . ?
 B9 F35 1.389(4) . ?
 B9 F36 1.380(5) . ?
 N1S4 C1S4 1.149(5) . ?
 C1S4 C2S4 1.466(6) . ?
 C2S4 H2SA 0.9800 . ?
 C2S4 H2SB 0.9800 . ?
 C2S4 H2SC 0.9800 . ?
 C4F H4F 0.9500 . ?
 C4F C5F 1.412(7) . ?
 C1S9 N1S9 1.137(5) . ?
 C1S9 C2S9 1.463(5) . ?
 C2S9 H2SD 0.9800 . ?
 C2S9 H2SE 0.9800 . ?
 C2S9 H2SF 0.9800 . ?
 B8 F31 1.382(5) . ?
 B8 F29 1.408(4) . ?
 B8 F32 1.381(5) . ?
 B8 F30 1.389(4) . ?
 B3 F9 1.386(5) . ?
 B3 F12 1.380(5) . ?
 B3 F11 1.380(5) . ?
 B3 F10 1.366(5) . ?
 F8 B2 1.388(5) . ?
 F7 B2 1.383(4) . ?
 F5 B2 1.409(5) . ?
 F6 B2 1.392(5) . ?
 F44 B11 1.391(4) . ?
 F41 B11 1.401(4) . ?
 F42 B11 1.384(4) . ?
 F43 B11 1.392(4) . ?
 F14A B4A 1.407(8) . ?
 F13A B4A 1.391(8) . ?
 F16A B4A 1.362(8) . ?
 F15A B4A 1.371(9) . ?
 B4 F28 1.392(10) . ?
 B4 F19 1.380(11) . ?
 B4 F25 1.376(11) . ?
 B4 F26 1.381(10) . ?
 F21 B6 1.394(5) . ?
 F22 B6 1.387(5) . ?
 F23 B6 1.382(4) . ?
 F24 B6 1.400(5) . ?
 B7A F25A 1.375(12) . ?
 B7A F28A 1.380(12) . ?
 B7A F27A 1.374(12) . ?
 B7A F26A 1.371(12) . ?
 F2 B1 1.389(5) . ?
 F1 B1 1.379(5) . ?
 F3 B1 1.347(5) . ?
 F4 B1 1.396(6) . ?
 F45A B12A 1.393(7) . ?
 F46A B12A 1.356(8) . ?
 F48A B12A 1.361(9) . ?
 B12A F47A 1.349(8) . ?
 N1S1 C1S1 1.142(5) . ?
 C1S1 C2S1 1.454(5) . ?
 C2S1 H2SG 0.9800 . ?
 C2S1 H2SH 0.9800 . ?
 C2S1 H2SI 0.9800 . ?
 N1 C1 1.133(5) . ?
 C1 C2 1.447(6) . ?
 C2 H2J 0.9800 . ?
 C2 H2K 0.9800 . ?
 C2 H2L 0.9800 . ?
 N1S8 C1S8 1.131(5) . ?
 C1S8 C2S8 1.462(5) . ?
 C2S8 H2SJ 0.9800 . ?
 C2S8 H2SK 0.9800 . ?
 C2S8 H2SL 0.9800 . ?
 N1S5 C1S5 1.130(5) . ?
 C2S5 H2SM 0.9800 . ?
 C2S5 H2SN 0.9800 . ?
 C2S5 H2SO 0.9800 . ?
 C2S5 C1S5 1.460(5) . ?
 N1T6 C1T6 1.118(6) . ?
 C1T6 C2T6 1.468(7) . ?
 C2T6 H2TA 0.9800 . ?
 C2T6 H2TB 0.9800 . ?
 C2T6 H2TC 0.9800 . ?
 C1T1 N1T1 1.186(5) . ?
 C1T1 C2T1 1.421(6) . ?
 C2T1 H2TD 0.9800 . ?
 C2T1 H2TE 0.9800 . ?
 C2T1 H2TF 0.9800 . ?
 C1S2 C2S2 1.445(7) . ?
 C1S2 N1S2 1.194(6) . ?
 C2S2 H2SP 0.9800 . ?
 C2S2 H2SQ 0.9800 . ?
 C2S2 H2SR 0.9800 . ?
 N1T9 C1T9 1.109(7) . ?
 C1T9 C2T9 1.471(9) . ?
 C2T9 H2TG 0.9800 . ?
 C2T9 H2TH 0.9800 . ?
 C2T9 H2TI 0.9800 . ?
 O1EW C2EW 1.418(8) . ?
 O1EW C3EW 1.427(7) . ?
 C4EW H4EA 0.9800 . ?
 C4EW H4EB 0.9800 . ?
 C4EW H4EC 0.9800 . ?
 C4EW C3EW 1.513(11) . ?
 C2EW H2EA 0.9900 . ?
 C2EW H2EB 0.9900 . ?
 C2EW C1EW 1.532(9) . ?
 C1EW H1EA 0.9800 . ?
 C1EW H1EB 0.9800 . ?
 C1EW H1EC 0.9800 . ?
 C3EW H3EA 0.9900 . ?
 C3EW H3EB 0.9900 . ?
 N1S7 C1S7 1.125(6) . ?
 C1S7 C2S7 1.510(7) . ?
 C2S7 H2SS 0.9800 . ?
 C2S7 H2ST 0.9800 . ?
 C2S7 H2SU 0.9800 . ?
 C2T4 H2TJ 0.9800 . ?
 C2T4 H2TK 0.9800 . ?
 C2T4 H2TL 0.9800 . ?
 C2T4 C1T4 1.436(6) . ?
 C1T4 N1T4 1.130(6) . ?
 O1EU C3EU 1.408(7) . ?
 O1EU C2EU 1.402(7) . ?
 C3EU H3EC 0.9900 . ?
 C3EU H3ED 0.9900 . ?
 C3EU C4EU 1.512(8) . ?
 C1EU H1ED 0.9800 . ?
 C1EU H1EE 0.9800 . ?
 C1EU H1EF 0.9800 . ?
 C1EU C2EU 1.485(7) . ?
 C2EU H2EC 0.9900 . ?
 C2EU H2ED 0.9900 . ?
 C4EU H4ED 0.9800 . ?
 C4EU H4EE 0.9800 . ?
 C4EU H4EF 0.9800 . ?
 N1S3 C1S3 1.166(6) . ?
 C1S3 C2S3 1.453(7) . ?
 C2S3 H2SV 0.9800 . ?
 C2S3 H2SW 0.9800 . ?
 C2S3 H2SX 0.9800 . ?
 N1S6 C1S6 1.173(7) . ?
 C2S6 H2SY 0.9800 . ?
 C2S6 H 0.9800 . ?
 C2S6 HA 0.9800 . ?
 C2S6 C1S6 1.466(7) . ?
 C2ET H2EE 0.9900 . ?
 C2ET H2EF 0.9900 . ?
 C2ET O1ET 1.288(8) . ?
 C2ET C1ET 1.382(9) . ?
 O1ET C3ET 1.378(8) . ?
 C3ET H3EE 0.9900 . ?
 C3ET H3EF 0.9900 . ?
 C3ET C4ET 1.468(11) . ?
 C1ET H1EG 0.9800 . ?
 C1ET H1EH 0.9800 . ?
 C1ET H1EI 0.9800 . ?
 C4ET H4EG 0.9800 . ?
 C4ET H4EH 0.9800 . ?
 C4ET H4EI 0.9800 . ?
 C5F H5F 0.9500 . ?
 B5A F17A 1.4017 . ?
 B5A F19A 1.4007 . ?
 B5A F20A 1.4024 . ?
 B5A F18A 1.4003 . ?
 B5B F17B 1.4034 . ?
 B5B F19B 1.4020 . ?
 B5B F20B 1.4010 . ?
 B5B F18B 1.4017 . ?
 B7B F25B 1.378(10) . ?
 B7B F28B 1.380(10) . ?
 B7B F27B 1.382(10) . ?
 B7B F26B 1.372(10) . ?
 F16B B4B 1.351(13) . ?
 F14B B4B 1.375(13) . ?
 B4B F13B 1.360(13) . ?
 B4B F15B 1.370(13) . ?
 B2A F23A 1.390(11) . ?
 B2A F24A 1.383(11) . ?
 B2A F20 1.379(10) . ?
 B2A F15 1.385(11) . ?
 B12B F47B 1.359(13) . ?
 B12B F46B 1.352(12) . ?
 B12B F48B 1.344(12) . ?
 B12B F45B 1.353(13) . ?
 C1EV C2EV 1.5187 . ?
 C2EV O1EV 1.4210 . ?
 O1EV C3EV 1.4213 . ?
 C3EV C4EV 1.5185 . ?
 N1T3 C1T3 1.141(14) . ?
 N1T5 C1T5 1.082(14) . ?
 C2T3 H2TM 0.9800 . ?
 C2T3 H2TN 0.9800 . ?
 C2T3 H2TO 0.9800 . ?
 C2T3 C1T3 1.489(14) . ?
 C1T5 C2T5 1.446(15) . ?
 C2T5 H2TP 0.9800 . ?
 C2T5 H2TQ 0.9800 . ?
 C2T5 H2TR 0.9800 . ?
 N1T2 C1T2 1.1619 . ?
 C1T2 C2T2 1.4533 . ?
 C2T2 H2TS 0.9800 . ?
 C2T2 H2TT 0.9800 . ?
 C2T2 H2TU 0.9800 . ?
 N1T8 C1T8 1.1622 . ?
 C1T8 C2T8 1.4541 . ?
 C2T8 H2TV 0.9800 . ?
 C2T8 H2TW 0.9800 . ?
 C2T8 H2TX 0.9800 . ?
 N1T7 C1T7 1.1616 . ?
 C1T7 C2T7 1.4534 . ?
 C2T7 H2TY 0.9800 . ?
 C2T7 HB 0.9800 . ?
 C2T7 HC 0.9800 . ?

loop_
  _geom_angle_atom_site_label_1
  _geom_angle_atom_site_label_2
  _geom_angle_atom_site_label_3
  _geom_angle
  _geom_angle_site_symmetry_1
  _geom_angle_site_symmetry_3
  _geom_angle_publ_flag
 N5B Cu2 N5C 94.68(9) . . ?
 N5B Cu2 N6C 101.36(10) . . ?
 N6A Cu2 N5B 160.80(10) . . ?
 N6A Cu2 N6B 94.76(10) . . ?
 N6A Cu2 N5C 91.77(10) . . ?
 N6A Cu2 N6C 97.61(10) . . ?
 N6B Cu2 N5B 80.80(9) . . ?
 N6B Cu2 N5C 171.57(10) . . ?
 N6B Cu2 N6C 94.89(9) . . ?
 N5C Cu2 N6C 78.95(9) . . ?
 N4H Cu5 N3G 93.14(9) . . ?
 N4G Cu5 N4H 99.07(9) . . ?
 N4G Cu5 N3G 77.35(9) . . ?
 N3H Cu5 N4H 80.84(9) . . ?
 N3H Cu5 N4G 169.18(9) . . ?
 N3H Cu5 N3I 94.89(10) . . ?
 N3H Cu5 N3G 91.84(9) . . ?
 N3I Cu5 N4H 170.38(9) . . ?
 N3I Cu5 N4G 86.75(10) . . ?
 N3I Cu5 N3G 95.62(9) . . ?
 N5H Cu6 N6I 100.52(9) . . ?
 N6H Cu6 N5H 79.82(9) . . ?
 N6H Cu6 N6G 96.93(10) . . ?
 N6H Cu6 N5I 175.78(10) . . ?
 N6H Cu6 N6I 97.78(9) . . ?
 N6G Cu6 N5H 164.90(9) . . ?
 N6G Cu6 N5I 86.23(10) . . ?
 N6G Cu6 N6I 94.52(10) . . ?
 N5I Cu6 N5H 97.84(9) . . ?
 N5I Cu6 N6I 79.14(9) . . ?
 N5E Cu4 N5F 92.92(10) . . ?
 N5E Cu4 N6F 99.48(10) . . ?
 N6D Cu4 N5E 162.66(10) . . ?
 N6D Cu4 N6E 95.09(10) . . ?
 N6D Cu4 N5F 92.86(10) . . ?
 N6D Cu4 N6F 97.66(10) . . ?
 N6E Cu4 N5E 81.01(10) . . ?
 N6E Cu4 N5F 170.40(10) . . ?
 N6E Cu4 N6F 94.61(10) . . ?
 N5F Cu4 N6F 78.98(10) . . ?
 N3E Cu3 N3D 92.87(10) . . ?
 N3E Cu3 N4E 75.47(9) . . ?
 N3E Cu3 N4D 172.82(10) . . ?
 N3E Cu3 N4F 94.55(10) . . ?
 N3E Cu3 N3F 93.65(10) . . ?
 N3D Cu3 N4E 96.38(10) . . ?
 N3D Cu3 N4D 80.49(10) . . ?
 N3D Cu3 N4F 169.64(10) . . ?
 N3D Cu3 N3F 93.68(10) . . ?
 N4D Cu3 N4E 102.39(10) . . ?
 N4D Cu3 N3F 89.53(10) . . ?
 N4F Cu3 N4E 92.48(10) . . ?
 N4F Cu3 N4D 92.38(10) . . ?
 N4F Cu3 N3F 78.65(10) . . ?
 N3F Cu3 N4E 165.50(9) . . ?
 N3A Cu1 N3B 92.86(10) . . ?
 N3A Cu1 N4C 172.96(10) . . ?
 N3A Cu1 N3C 96.80(10) . . ?
 N3A Cu1 N4B 94.67(10) . . ?
 N3A Cu1 N4A 80.00(11) . . ?
 N3B Cu1 N4C 92.64(10) . . ?
 N3B Cu1 N3C 92.18(9) . . ?
 N3B Cu1 N4B 75.71(10) . . ?
 N3B Cu1 N4A 172.17(10) . . ?
 N4C Cu1 N3C 78.59(10) . . ?
 N4C Cu1 N4B 90.95(10) . . ?
 N4C Cu1 N4A 94.73(11) . . ?
 N3C Cu1 N4B 163.72(9) . . ?
 N4A Cu1 N3C 91.86(10) . . ?
 N4A Cu1 N4B 101.51(10) . . ?
 C16I O1I C13I 115.9(2) . . ?
 C13G O1G C16G 116.9(2) . . ?
 C16H O1H C13H 116.6(2) . . ?
 C16B O1B C13B 115.4(2) . . ?
 C16E O1E C13E 116.2(2) . . ?
 C13A O1A C16A 117.7(2) . . ?
 C13D O1D C16D 116.6(2) . . ?
 C22B N5B Cu2 114.14(19) . . ?
 C22B N5B C19B 118.8(2) . . ?
 C19B N5B Cu2 126.62(18) . . ?
 C13C O1C C16C 118.0(2) . . ?
 C22H N5H Cu6 113.75(18) . . ?
 C22H N5H C19H 119.0(2) . . ?
 C19H N5H Cu6 126.74(17) . . ?
 C10H N4H Cu5 129.60(17) . . ?
 C9H N4H Cu5 112.70(19) . . ?
 C9H N4H C10H 117.5(2) . . ?
 C23H N6H Cu6 112.91(18) . . ?
 C25H N6H Cu6 140.1(2) . . ?
 C25H N6H C23H 106.9(2) . . ?
 C9G N4G Cu5 117.46(18) . . ?
 C9G N4G C10G 117.1(2) . . ?
 C10G N4G Cu5 123.75(18) . . ?
 C8H N3H Cu5 112.42(18) . . ?
 C6H N3H Cu5 139.9(2) . . ?
 C6H N3H C8H 107.0(2) . . ?
 C24A N7A C28A 126.4(2) . . ?
 C25A N7A C24A 107.2(2) . . ?
 C25A N7A C28A 126.2(2) . . ?
 C25D N7D C28D 126.3(3) . . ?
 C25D N7D C24D 107.2(2) . . ?
 C24D N7D C28D 126.1(3) . . ?
 C23A N6A Cu2 121.11(18) . . ?
 C25A N6A Cu2 131.9(2) . . ?
 C25A N6A C23A 106.6(2) . . ?
 C23G N6G Cu6 116.85(18) . . ?
 C25G N6G Cu6 136.2(2) . . ?
 C25G N6G C23G 106.0(2) . . ?
 C22E N5E Cu4 114.06(19) . . ?
 C22E N5E C19E 118.7(2) . . ?
 C19E N5E Cu4 126.97(18) . . ?
 C6H N2H C3H 126.1(2) . . ?
 C6H N2H C7H 107.3(2) . . ?
 C7H N2H C3H 126.6(2) . . ?
 C23B N6B Cu2 111.75(17) . . ?
 C25B N6B Cu2 141.4(2) . . ?
 C25B N6B C23B 106.9(2) . . ?
 C24H N7H C28H 127.0(2) . . ?
 C25H N7H C24H 107.9(2) . . ?
 C25H N7H C28H 125.1(2) . . ?
 C25D N6D Cu4 131.7(2) . . ?
 C25D N6D C23D 106.5(2) . . ?
 C23D N6D Cu4 121.49(19) . . ?
 C8I N3I Cu5 117.12(18) . . ?
 C6I N3I Cu5 135.4(2) . . ?
 C6I N3I C8I 106.3(2) . . ?
 C25I N7I C28I 125.8(3) . . ?
 C24I N7I C25I 107.1(2) . . ?
 C24I N7I C28I 127.1(3) . . ?
 C6G N2G C3G 126.5(2) . . ?
 C7G N2G C3G 126.4(3) . . ?
 C7G N2G C6G 107.1(2) . . ?
 C6D N2D C3D 127.3(2) . . ?
 C7D N2D C6D 107.2(2) . . ?
 C7D N2D C3D 125.4(3) . . ?
 C6I N2I C7I 107.7(2) . . ?
 C6I N2I C3I 127.1(2) . . ?
 C7I N2I C3I 125.0(2) . . ?
 C24G N7G C28G 124.6(2) . . ?
 C25G N7G C24G 107.3(2) . . ?
 C25G N7G C28G 128.0(2) . . ?
 C24E N7E C28E 126.2(3) . . ?
 C25E N7E C24E 108.0(2) . . ?
 C25E N7E C28E 125.8(2) . . ?
 C23E N6E Cu4 111.81(18) . . ?
 C25E N6E Cu4 141.8(2) . . ?
 C25E N6E C23E 106.4(2) . . ?
 C8E N3E Cu3 118.13(18) . . ?
 C6E N3E Cu3 135.5(2) . . ?
 C6E N3E C8E 106.4(2) . . ?
 C25B N7B C24B 107.3(2) . . ?
 C25B N7B C28B 125.7(2) . . ?
 C24B N7B C28B 127.0(2) . . ?
 C22I N5I Cu6 115.25(18) . . ?
 C22I N5I C19I 117.7(2) . . ?
 C19I N5I Cu6 125.50(18) . . ?
 C9I N4I C10I 118.4(2) . . ?
 C23I N6I Cu6 106.52(17) . . ?
 C25I N6I Cu6 148.0(2) . . ?
 C25I N6I C23I 105.1(2) . . ?
 C24C N7C C28C 127.4(3) . . ?
 C25C N7C C24C 106.9(2) . . ?
 C25C N7C C28C 125.8(3) . . ?
 C22C N5C Cu2 115.89(19) . . ?
 C22C N5C C19C 118.4(2) . . ?
 C19C N5C Cu2 125.73(19) . . ?
 C6C N2C C3C 127.2(3) . . ?
 C7C N2C C6C 107.0(2) . . ?
 C7C N2C C3C 125.7(3) . . ?
 C6E N2E C3E 126.8(2) . . ?
 C6E N2E C7E 107.1(2) . . ?
 C7E N2E C3E 126.0(3) . . ?
 C6D N3D Cu3 143.4(2) . . ?
 C6D N3D C8D 105.9(2) . . ?
 C8D N3D Cu3 110.38(19) . . ?
 C6A N3A Cu1 140.6(2) . . ?
 C6A N3A C8A 106.5(3) . . ?
 C8A N3A Cu1 112.9(2) . . ?
 C6A N2A C3A 126.0(3) . . ?
 C6A N2A C7A 107.5(3) . . ?
 C7A N2A C3A 126.5(3) . . ?
 C13F O1F C16F 117.0(3) . . ?
 C10E N4E Cu3 133.53(19) . . ?
 C9E N4E Cu3 107.70(19) . . ?
 C9E N4E C10E 117.7(3) . . ?
 C8G N3G Cu5 104.56(17) . . ?
 C6G N3G Cu5 149.7(2) . . ?
 C6G N3G C8G 105.5(2) . . ?
 C25F N7F C24F 107.1(3) . . ?
 C25F N7F C28F 125.7(3) . . ?
 C24F N7F C28F 127.2(3) . . ?
 C6B N3B Cu1 136.7(2) . . ?
 C6B N3B C8B 106.2(3) . . ?
 C8B N3B Cu1 117.06(19) . . ?
 C6B N2B C3B 127.2(3) . . ?
 C6B N2B C7B 107.1(2) . . ?
 C7B N2B C3B 125.7(3) . . ?
 C10D N4D Cu3 130.1(2) . . ?
 C9D N4D Cu3 114.2(2) . . ?
 C9D N4D C10D 115.4(3) . . ?
 C10F N4F Cu3 128.2(2) . . ?
 C9F N4F Cu3 116.2(2) . . ?
 C9F N4F C10F 115.6(3) . . ?
 C22F N5F Cu4 116.2(2) . . ?
 C22F N5F C19F 119.1(3) . . ?
 C19F N5F Cu4 124.6(2) . . ?
 C22G N5G C19G 117.9(2) . . ?
 C23C N6C Cu2 106.37(18) . . ?
 C25C N6C Cu2 147.7(2) . . ?
 C25C N6C C23C 105.9(2) . . ?
 C30G N8G C26G 116.6(3) . . ?
 C22A N5A C19A 121.3(3) . . ?
 C10C N4C Cu1 126.4(2) . . ?
 C9C N4C Cu1 117.1(2) . . ?
 C9C N4C C10C 116.0(3) . . ?
 C8C N3C Cu1 102.66(18) . . ?
 C6C N3C Cu1 151.0(2) . . ?
 C6C N3C C8C 105.7(3) . . ?
 C10B N4B Cu1 132.4(2) . . ?
 C9B N4B Cu1 108.3(2) . . ?
 C9B N4B C10B 118.1(3) . . ?
 C10A N4A Cu1 128.4(2) . . ?
 C9A N4A Cu1 113.6(2) . . ?
 C9A N4A C10A 117.9(3) . . ?
 C23F N6F Cu4 106.17(19) . . ?
 C25F N6F Cu4 147.9(2) . . ?
 C25F N6F C23F 105.7(3) . . ?
 C26D N8D C30D 116.8(3) . . ?
 C8F N3F Cu3 102.58(19) . . ?
 C6F N3F Cu3 152.1(2) . . ?
 C6F N3F C8F 105.3(3) . . ?
 C22D N5D C19D 119.8(3) . . ?
 C5E N1E C1E 116.3(3) . . ?
 C30A N8A C26A 116.8(3) . . ?
 N6H C23H C22H 116.2(2) . . ?
 C24H C23H N6H 109.3(2) . . ?
 C24H C23H C22H 134.4(3) . . ?
 C6F N2F C3F 127.2(3) . . ?
 C7F N2F C6F 106.8(3) . . ?
 C7F N2F C3F 126.0(3) . . ?
 C14I C13I O1I 119.1(2) . . ?
 C14I C13I C12I 121.6(3) . . ?
 C12I C13I O1I 119.3(2) . . ?
 C1D N1D C5D 116.4(3) . . ?
 N6E C23E C22E 116.2(2) . . ?
 C24E C23E N6E 109.7(2) . . ?
 C24E C23E C22E 134.1(3) . . ?
 C15H C10H N4H 119.2(2) . . ?
 C15H C10H C11H 120.7(2) . . ?
 C11H C10H N4H 120.1(3) . . ?
 N5H C22H C23H 116.6(2) . . ?
 N5H C22H H22H 121.7 . . ?
 C23H C22H H22H 121.7 . . ?
 N3H C8H C9H 116.8(2) . . ?
 C7H C8H N3H 109.5(2) . . ?
 C7H C8H C9H 133.7(3) . . ?
 N6B C23B C22B 116.1(2) . . ?
 C24B C23B N6B 109.3(2) . . ?
 C24B C23B C22B 134.6(3) . . ?
 C5B N1B C1B 116.2(3) . . ?
 N5E C22E C23E 116.7(3) . . ?
 N5E C22E H22E 121.6 . . ?
 C23E C22E H22E 121.6 . . ?
 C10G C11G H11G 120.2 . . ?
 C10G C11G C12G 119.6(3) . . ?
 C12G C11G H11G 120.2 . . ?
 N4G C9G H9G 120.1 . . ?
 N4G C9G C8G 119.9(3) . . ?
 C8G C9G H9G 120.1 . . ?
 C16G C21G H21G 120.6 . . ?
 C16G C21G C20G 118.9(3) . . ?
 C20G C21G H21G 120.6 . . ?
 C11G C10G N4G 119.5(2) . . ?
 C11G C10G C15G 120.5(3) . . ?
 C15G C10G N4G 120.0(2) . . ?
 C18H C19H N5H 121.2(2) . . ?
 C18H C19H C20H 120.5(2) . . ?
 C20H C19H N5H 118.2(2) . . ?
 N6C C23C C22C 119.3(3) . . ?
 C24C C23C N6C 109.9(3) . . ?
 C24C C23C C22C 130.8(3) . . ?
 N3G C8G C9G 119.4(3) . . ?
 C7G C8G N3G 110.6(2) . . ?
 C7G C8G C9G 130.0(3) . . ?
 C21G C16G O1G 118.0(3) . . ?
 C21G C16G C17G 121.6(3) . . ?
 C17G C16G O1G 120.4(3) . . ?
 C17H C16H O1H 122.0(2) . . ?
 C17H C16H C21H 121.3(3) . . ?
 C21H C16H O1H 116.6(3) . . ?
 N7G C24G H24G 127.1 . . ?
 C23G C24G N7G 105.9(3) . . ?
 C23G C24G H24G 127.1 . . ?
 C10I C15I H15I 120.0 . . ?
 C14I C15I H15I 120.0 . . ?
 C14I C15I C10I 120.0(3) . . ?
 C5H N1H C1H 116.2(3) . . ?
 N5B C22B C23B 116.7(2) . . ?
 N5B C22B H22B 121.6 . . ?
 C23B C22B H22B 121.6 . . ?
 C16H C17H H17H 120.6 . . ?
 C16H C17H C18H 118.7(3) . . ?
 C18H C17H H17H 120.6 . . ?
 N6I C23I C22I 118.6(2) . . ?
 C24I C23I N6I 110.2(2) . . ?
 C24I C23I C22I 131.2(3) . . ?
 O1I C16I C21I 116.6(2) . . ?
 C17I C16I O1I 123.1(2) . . ?
 C17I C16I C21I 120.3(3) . . ?
 C30E N8E C26E 116.3(3) . . ?
 C30B N8B C26B 115.9(3) . . ?
 N6G C23G C22G 121.9(3) . . ?
 C24G C23G N6G 109.6(2) . . ?
 C24G C23G C22G 128.4(3) . . ?
 N4H C9H C8H 117.0(3) . . ?
 N4H C9H H9H 121.5 . . ?
 C8H C9H H9H 121.5 . . ?
 C16B C21B H21B 120.2 . . ?
 C20B C21B H21B 120.2 . . ?
 C20B C21B C16B 119.6(3) . . ?
 C19H C18H C17H 120.2(3) . . ?
 C19H C18H H18H 119.9 . . ?
 C17H C18H H18H 119.9 . . ?
 C1A N1A C5A 115.8(3) . . ?
 N3I C8I C9I 120.8(3) . . ?
 C7I C8I N3I 109.6(2) . . ?
 C7I C8I C9I 129.5(3) . . ?
 C30I N8I C26I 116.5(3) . . ?
 N6G C25G N7G 111.2(2) . . ?
 N6G C25G H25G 124.4 . . ?
 N7G C25G H25G 124.4 . . ?
 N7H C24H H24H 127.2 . . ?
 C23H C24H N7H 105.6(2) . . ?
 C23H C24H H24H 127.2 . . ?
 C10I C11I H11I 120.1 . . ?
 C12I C11I H11I 120.1 . . ?
 C12I C11I C10I 119.8(3) . . ?
 N6A C23A C22A 120.1(3) . . ?
 C24A C23A N6A 109.1(2) . . ?
 C24A C23A C22A 130.5(3) . . ?
 C19I C20I H20I 120.0 . . ?
 C19I C20I C21I 120.1(3) . . ?
 C21I C20I H20I 120.0 . . ?
 N7A C24A H24A 126.8 . . ?
 C23A C24A N7A 106.5(3) . . ?
 C23A C24A H24A 126.8 . . ?
 C27A C28A N7A 119.5(3) . . ?
 C27A C28A C29A 119.5(3) . . ?
 C29A C28A N7A 121.0(3) . . ?
 N7E C24E H24E 127.3 . . ?
 C23E C24E N7E 105.4(2) . . ?
 C23E C24E H24E 127.3 . . ?
 N5C C22C C23C 119.4(3) . . ?
 N5C C22C H22C 120.3 . . ?
 C23C C22C H22C 120.3 . . ?
 C21B C16B O1B 116.6(3) . . ?
 C17B C16B O1B 122.3(3) . . ?
 C17B C16B C21B 121.0(3) . . ?
 C26H N8H C30H 116.6(3) . . ?
 C27D C28D N7D 119.8(3) . . ?
 C27D C28D C29D 119.2(3) . . ?
 C29D C28D N7D 121.0(3) . . ?
 C16H C21H H21H 120.1 . . ?
 C20H C21H C16H 119.8(3) . . ?
 C20H C21H H21H 120.1 . . ?
 C21B C20B H20B 120.2 . . ?
 C21B C20B C19B 119.6(3) . . ?
 C19B C20B H20B 120.2 . . ?
 N3E C8E C9E 119.7(3) . . ?
 C7E C8E N3E 109.9(3) . . ?
 C7E C8E C9E 130.4(3) . . ?
 N3C C8C C9C 120.8(3) . . ?
 C7C C8C N3C 110.3(3) . . ?
 C7C C8C C9C 128.8(3) . . ?
 N6B C25B N7B 110.6(2) . . ?
 N6B C25B H25B 124.7 . . ?
 N7B C25B H25B 124.7 . . ?
 C27G C28G N7G 119.3(3) . . ?
 C27G C28G C29G 119.7(3) . . ?
 C29G C28G N7G 121.1(3) . . ?
 N3I C6I N2I 110.3(2) . . ?
 N3I C6I H6I 124.9 . . ?
 N2I C6I H6I 124.9 . . ?
 C10H C15H H15H 120.2 . . ?
 C10H C15H C14H 119.6(3) . . ?
 C14H C15H H15H 120.2 . . ?
 C20A C19A N5A 119.2(3) . . ?
 C20A C19A C18A 118.6(3) . . ?
 C18A C19A N5A 121.8(3) . . ?
 C15G C14G H14G 120.3 . . ?
 C15G C14G C13G 119.3(3) . . ?
 C13G C14G H14G 120.3 . . ?
 N7C C24C H24C 127.1 . . ?
 C23C C24C N7C 105.8(3) . . ?
 C23C C24C H24C 127.1 . . ?
 C16E C21E H21E 120.2 . . ?
 C16E C21E C20E 119.6(3) . . ?
 C20E C21E H21E 120.2 . . ?
 C15I C10I N4I 117.3(2) . . ?
 C15I C10I C11I 120.1(2) . . ?
 C11I C10I N4I 122.6(2) . . ?
 C13I C14I C15I 119.1(3) . . ?
 C13I C14I H14I 120.4 . . ?
 C15I C14I H14I 120.4 . . ?
 N2D C6D H6D 124.7 . . ?
 N3D C6D N2D 110.6(3) . . ?
 N3D C6D H6D 124.7 . . ?
 C30C N8C C26C 116.0(3) . . ?
 C2G C3G N2G 119.5(3) . . ?
 C4G C3G N2G 121.0(3) . . ?
 C4G C3G C2G 119.6(3) . . ?
 C20G C19G N5G 118.8(3) . . ?
 C20G C19G C18G 120.1(3) . . ?
 C18G C19G N5G 121.0(3) . . ?
 N2I C7I H7I 127.0 . . ?
 C8I C7I N2I 106.0(3) . . ?
 C8I C7I H7I 127.0 . . ?
 N7D C25D H25D 124.6 . . ?
 N6D C25D N7D 110.8(3) . . ?
 N6D C25D H25D 124.6 . . ?
 C21A C16A O1A 116.7(3) . . ?
 C21A C16A C17A 120.8(3) . . ?
 C17A C16A O1A 122.4(3) . . ?
 C4H C3H N2H 119.1(3) . . ?
 C2H C3H N2H 121.3(3) . . ?
 C2H C3H C4H 119.6(3) . . ?
 N3B C6B N2B 110.8(3) . . ?
 N3B C6B H6B 124.6 . . ?
 N2B C6B H6B 124.6 . . ?
 N7B C24B H24B 127.0 . . ?
 C23B C24B N7B 106.0(2) . . ?
 C23B C24B H24B 127.0 . . ?
 C20B C19B N5B 118.4(2) . . ?
 C18B C19B N5B 120.8(3) . . ?
 C18B C19B C20B 120.8(3) . . ?
 C19H C20H H20H 120.3 . . ?
 C21H C20H C19H 119.5(2) . . ?
 C21H C20H H20H 120.3 . . ?
 N3H C6H N2H 110.2(2) . . ?
 N3H C6H H6H 124.9 . . ?
 N2H C6H H6H 124.9 . . ?
 C28G C27G H27G 120.9 . . ?
 C26G C27G C28G 118.3(3) . . ?
 C26G C27G H27G 120.9 . . ?
 C16A C21A H21A 120.4 . . ?
 C16A C21A C20A 119.2(3) . . ?
 C20A C21A H21A 120.4 . . ?
 C10G C15G H15G 120.0 . . ?
 C14G C15G C10G 120.0(3) . . ?
 C14G C15G H15G 120.0 . . ?
 C4E C3E N2E 120.0(3) . . ?
 C4E C3E C2E 118.8(3) . . ?
 C2E C3E N2E 121.2(3) . . ?
 C11E C10E N4E 120.9(3) . . ?
 C15E C10E N4E 118.7(3) . . ?
 C15E C10E C11E 120.4(3) . . ?
 C13I C12I C11I 119.3(3) . . ?
 C13I C12I H12I 120.4 . . ?
 C11I C12I H12I 120.4 . . ?
 C1G N1G C5G 116.6(3) . . ?
 C10H C11H H11H 120.2 . . ?
 C10H C11H C12H 119.7(3) . . ?
 C12H C11H H11H 120.2 . . ?
 N7A C25A H25A 124.7 . . ?
 N6A C25A N7A 110.6(2) . . ?
 N6A C25A H25A 124.7 . . ?
 C21D C20D H20D 120.0 . . ?
 C19D C20D H20D 120.0 . . ?
 C19D C20D C21D 120.0(3) . . ?
 C11B C10B N4B 121.6(3) . . ?
 C15B C10B N4B 118.2(3) . . ?
 C15B C10B C11B 120.2(3) . . ?
 N5I C22I C23I 119.4(3) . . ?
 N5I C22I H22I 120.3 . . ?
 C23I C22I H22I 120.3 . . ?
 N6H C25H N7H 110.3(2) . . ?
 N6H C25H H25H 124.9 . . ?
 N7H C25H H25H 124.9 . . ?
 C3I C2I H2I 121.2 . . ?
 C3I C2I C37 117.7(3) . . ?
 C37 C2I H2I 121.2 . . ?
 C14D C13D O1D 117.6(3) . . ?
 C12D C13D O1D 121.2(3) . . ?
 C12D C13D C14D 121.1(3) . . ?
 N7I C25I H25I 124.2 . . ?
 N6I C25I N7I 111.7(3) . . ?
 N6I C25I H25I 124.2 . . ?
 N3E C6E N2E 110.6(3) . . ?
 N3E C6E H6E 124.7 . . ?
 N2E C6E H6E 124.7 . . ?
 N2H C7H H7H 127.0 . . ?
 C8H C7H N2H 106.0(3) . . ?
 C8H C7H H7H 127.0 . . ?
 C19A C20A C21A 121.4(3) . . ?
 C19A C20A H20A 119.3 . . ?
 C21A C20A H20A 119.3 . . ?
 N5G C22G C23G 119.6(3) . . ?
 N5G C22G H22G 120.2 . . ?
 C23G C22G H22G 120.2 . . ?
 C21G C20G H20G 120.0 . . ?
 C19G C20G C21G 120.0(3) . . ?
 C19G C20G H20G 120.0 . . ?
 N2G C6G H6G 124.3 . . ?
 N3G C6G N2G 111.4(3) . . ?
 N3G C6G H6G 124.3 . . ?
 N4I C9I C8I 119.4(3) . . ?
 N4I C9I H9I 120.3 . . ?
 C8I C9I H9I 120.3 . . ?
 C20D C21D H21D 120.2 . . ?
 C16D C21D C20D 119.5(3) . . ?
 C16D C21D H21D 120.2 . . ?
 C21E C16E O1E 116.0(3) . . ?
 C17E C16E O1E 123.1(3) . . ?
 C17E C16E C21E 120.9(3) . . ?
 C4D C3D N2D 120.4(3) . . ?
 C2D C3D N2D 120.6(3) . . ?
 C2D C3D C4D 119.0(3) . . ?
 N5A C22A C23A 118.7(3) . . ?
 N5A C22A H22A 120.7 . . ?
 C23A C22A H22A 120.7 . . ?
 O1G C13G C14G 115.4(2) . . ?
 C12G C13G O1G 123.8(2) . . ?
 C12G C13G C14G 120.9(3) . . ?
 N3B C8B C9B 120.0(3) . . ?
 C7B C8B N3B 109.6(3) . . ?
 C7B C8B C9B 130.4(3) . . ?
 C15C C10C N4C 118.6(3) . . ?
 C15C C10C C11C 120.2(3) . . ?
 C11C C10C N4C 121.2(3) . . ?
 C20I C19I N5I 120.2(2) . . ?
 C20I C19I C18I 119.8(3) . . ?
 C18I C19I N5I 119.9(2) . . ?
 C27I C28I N7I 120.6(3) . . ?
 C27I C28I C29I 119.6(3) . . ?
 C29I C28I N7I 119.8(3) . . ?
 C16B C17B H17B 120.3 . . ?
 C16B C17B C18B 119.4(3) . . ?
 C18B C17B H17B 120.3 . . ?
 C16G C17G H17G 120.2 . . ?
 C16G C17G C18G 119.6(3) . . ?
 C18G C17G H17G 120.2 . . ?
 N6D C23D C22D 120.3(3) . . ?
 C24D C23D N6D 109.5(3) . . ?
 C24D C23D C22D 129.9(3) . . ?
 N7D C24D H24D 127.0 . . ?
 C23D C24D N7D 106.0(3) . . ?
 C23D C24D H24D 127.0 . . ?
 N7C C25C H25C 124.3 . . ?
 N6C C25C N7C 111.5(3) . . ?
 N6C C25C H25C 124.3 . . ?
 C20C C19C N5C 118.8(3) . . ?
 C20C C19C C18C 120.4(3) . . ?
 C18C C19C N5C 120.8(3) . . ?
 N4E C9E C8E 118.9(3) . . ?
 N4E C9E H9E 120.6 . . ?
 C8E C9E H9E 120.6 . . ?
 N5F C22F H22F 120.3 . . ?
 N5F C22F C23F 119.3(3) . . ?
 C23F C22F H22F 120.3 . . ?
 C20E C19E N5E 118.9(2) . . ?
 C18E C19E N5E 120.8(3) . . ?
 C18E C19E C20E 120.3(3) . . ?
 C2I C3I N2I 121.6(3) . . ?
 C2I C3I C4I 119.9(3) . . ?
 C4I C3I N2I 118.5(3) . . ?
 C3I C4I H4I 121.1 . . ?
 C5I C4I C3I 117.8(3) . . ?
 C5I C4I H4I 121.1 . . ?
 C11G C12G H12G 120.2 . . ?
 C13G C12G C11G 119.7(3) . . ?
 C13G C12G H12G 120.2 . . ?
 C14B C13B O1B 119.4(3) . . ?
 C12B C13B O1B 118.8(3) . . ?
 C12B C13B C14B 121.8(3) . . ?
 C16I C21I H21I 120.1 . . ?
 C20I C21I C16I 119.8(3) . . ?
 C20I C21I H21I 120.1 . . ?
 C11H C12H H12H 120.5 . . ?
 C13H C12H C11H 119.1(3) . . ?
 C13H C12H H12H 120.5 . . ?
 C30F N8F C26F 115.5(3) . . ?
 C15F C10F N4F 120.3(3) . . ?
 C11F C10F N4F 119.9(3) . . ?
 C11F C10F C15F 119.7(3) . . ?
 C13B C14B H14B 120.5 . . ?
 C13B C14B C15B 118.9(3) . . ?
 C15B C14B H14B 120.5 . . ?
 C21D C16D O1D 117.9(3) . . ?
 C21D C16D C17D 121.5(3) . . ?
 C17D C16D O1D 120.5(3) . . ?
 C14C C13C O1C 115.0(3) . . ?
 C14C C13C C12C 120.9(3) . . ?
 C12C C13C O1C 124.1(3) . . ?
 N6F C23F C22F 119.1(3) . . ?
 C24F C23F N6F 110.2(3) . . ?
 C24F C23F C22F 130.7(3) . . ?
 C15H C14H H14H 120.5 . . ?
 C13H C14H C15H 119.0(3) . . ?
 C13H C14H H14H 120.5 . . ?
 N2G C7G H7G 127.3 . . ?
 C8G C7G N2G 105.4(3) . . ?
 C8G C7G H7G 127.3 . . ?
 C13A C14A H14A 120.5 . . ?
 C15A C14A H14A 120.5 . . ?
 C15A C14A C13A 118.9(3) . . ?
 C19G C18G H18G 120.2 . . ?
 C17G C18G C19G 119.7(3) . . ?
 C17G C18G H18G 120.2 . . ?
 C14E C13E O1E 119.3(3) . . ?
 C12E C13E O1E 118.9(3) . . ?
 C12E C13E C14E 121.8(3) . . ?
 C19C C20C H20C 119.9 . . ?
 C19C C20C C21C 120.3(3) . . ?
 C21C C20C H20C 119.9 . . ?
 N2E C7E H7E 127.0 . . ?
 C8E C7E N2E 106.1(3) . . ?
 C8E C7E H7E 127.0 . . ?
 C20D C19D N5D 118.6(3) . . ?
 C20D C19D C18D 119.6(3) . . ?
 C18D C19D N5D 121.6(3) . . ?
 C5C N1C C1C 116.1(3) . . ?
 N7I C24I H24I 127.0 . . ?
 C23I C24I N7I 106.0(3) . . ?
 C23I C24I H24I 127.0 . . ?
 N3A C6A N2A 110.6(3) . . ?
 N3A C6A H6A 124.7 . . ?
 N2A C6A H6A 124.7 . . ?
 C2B C3B N2B 120.8(3) . . ?
 C4B C3B N2B 120.1(3) . . ?
 C4B C3B C2B 119.1(3) . . ?
 C27B C28B N7B 120.6(3) . . ?
 C29B C28B N7B 120.1(3) . . ?
 C29B C28B C27B 119.2(3) . . ?
 C27H C28H N7H 120.6(3) . . ?
 C27H C28H C29H 119.5(3) . . ?
 C29H C28H N7H 119.9(3) . . ?
 C18F C19F N5F 121.1(3) . . ?
 C20F C19F N5F 119.1(3) . . ?
 C20F C19F C18F 119.7(3) . . ?
 C12H C13H O1H 118.9(3) . . ?
 C12H C13H C14H 121.9(3) . . ?
 C14H C13H O1H 119.1(3) . . ?
 C3H C4H H4H 121.3 . . ?
 C3H C4H C5H 117.4(3) . . ?
 C5H C4H H4H 121.3 . . ?
 C13E C14E H14E 120.7 . . ?
 C13E C14E C15E 118.7(3) . . ?
 C15E C14E H14E 120.7 . . ?
 N3D C8D C9D 117.1(3) . . ?
 C7D C8D N3D 110.4(3) . . ?
 C7D C8D C9D 132.5(3) . . ?
 N3F C8F C9F 120.9(3) . . ?
 C7F C8F N3F 110.1(3) . . ?
 C7F C8F C9F 129.0(3) . . ?
 C19I C18I H18I 119.9 . . ?
 C17I C18I C19I 120.3(3) . . ?
 C17I C18I H18I 119.9 . . ?
 C13E C12E H12E 120.2 . . ?
 C13E C12E C11E 119.5(3) . . ?
 C11E C12E H12E 120.2 . . ?
 C10B C11B H11B 120.1 . . ?
 C12B C11B C10B 119.7(3) . . ?
 C12B C11B H11B 120.1 . . ?
 C21E C20E H20E 120.1 . . ?
 C19E C20E C21E 119.9(3) . . ?
 C19E C20E H20E 120.1 . . ?
 C2I C37 H37 118.0 . . ?
 N1I C37 C2I 124.0(3) . . ?
 N1I C37 H37 118.0 . . ?
 N5D C22D C23D 118.5(3) . . ?
 N5D C22D H22D 120.8 . . ?
 C23D C22D H22D 120.8 . . ?
 C19B C18B C17B 119.5(3) . . ?
 C19B C18B H18B 120.2 . . ?
 C17B C18B H18B 120.2 . . ?
 C3D C4D H4D 120.9 . . ?
 C5D C4D C3D 118.2(3) . . ?
 C5D C4D H4D 120.9 . . ?
 N7E C25E H25E 124.8 . . ?
 N6E C25E N7E 110.4(3) . . ?
 N6E C25E H25E 124.8 . . ?
 C15D C10D N4D 119.8(3) . . ?
 C11D C10D N4D 120.0(3) . . ?
 C11D C10D C15D 120.2(3) . . ?
 C29C C28C N7C 120.3(3) . . ?
 C27C C28C N7C 120.7(3) . . ?
 C27C C28C C29C 119.0(3) . . ?
 N7F C25F H25F 124.3 . . ?
 N6F C25F N7F 111.4(3) . . ?
 N6F C25F H25F 124.3 . . ?
 C19C C18C H18C 120.6 . . ?
 C17C C18C C19C 118.7(3) . . ?
 C17C C18C H18C 120.6 . . ?
 C10E C11E H11E 120.2 . . ?
 C12E C11E C10E 119.7(3) . . ?
 C12E C11E H11E 120.2 . . ?
 N8G C30G H30G 117.9 . . ?
 N8G C30G C29G 124.2(3) . . ?
 C29G C30G H30G 117.9 . . ?
 C28D C27D H27D 120.9 . . ?
 C28D C27D C26D 118.3(3) . . ?
 C26D C27D H27D 120.9 . . ?
 N1D C5D C4D 124.1(3) . . ?
 N1D C5D H5D 117.9 . . ?
 C4D C5D H5D 117.9 . . ?
 N2B C7B H7B 126.9 . . ?
 C8B C7B N2B 106.2(3) . . ?
 C8B C7B H7B 126.9 . . ?
 C3E C4E H4E 120.8 . . ?
 C5E C4E C3E 118.4(3) . . ?
 C5E C4E H4E 120.8 . . ?
 C2A C3A N2A 119.9(3) . . ?
 C4A C3A N2A 120.8(3) . . ?
 C4A C3A C2A 119.3(3) . . ?
 C28G C29G C30G 117.3(3) . . ?
 C28G C29G H29G 121.3 . . ?
 C30G C29G H29G 121.3 . . ?
 C28D C29D H29D 121.0 . . ?
 C30D C29D C28D 118.0(3) . . ?
 C30D C29D H29D 121.0 . . ?
 C13B C12B C11B 119.6(3) . . ?
 C13B C12B H12B 120.2 . . ?
 C11B C12B H12B 120.2 . . ?
 N2C C6C H6C 124.5 . . ?
 N3C C6C N2C 111.1(3) . . ?
 N3C C6C H6C 124.5 . . ?
 N2C C7C H7C 127.0 . . ?
 C8C C7C N2C 105.9(3) . . ?
 C8C C7C H7C 127.0 . . ?
 N4D C9D C8D 117.0(3) . . ?
 N4D C9D H9D 121.5 . . ?
 C8D C9D H9D 121.5 . . ?
 C3D C2D H2D 121.1 . . ?
 C3D C2D C1D 117.8(3) . . ?
 C1D C2D H2D 121.1 . . ?
 C19E C18E H18E 120.0 . . ?
 C19E C18E C17E 120.1(3) . . ?
 C17E C18E H18E 120.0 . . ?
 N8G C26G C27G 123.9(3) . . ?
 N8G C26G H26G 118.0 . . ?
 C27G C26G H26G 118.0 . . ?
 C2C C3C N2C 121.0(3) . . ?
 C2C C3C C4C 119.9(3) . . ?
 C4C C3C N2C 119.1(3) . . ?
 C28E C29E H29E 121.2 . . ?
 C30E C29E H29E 121.2 . . ?
 C30E C29E C28E 117.5(3) . . ?
 C3E C2E H2E 121.1 . . ?
 C1E C2E C3E 117.9(3) . . ?
 C1E C2E H2E 121.1 . . ?
 N4B C9B C8B 118.6(3) . . ?
 N4B C9B H9B 120.7 . . ?
 C8B C9B H9B 120.7 . . ?
 C29E C28E N7E 120.3(3) . . ?
 C27E C28E N7E 120.4(3) . . ?
 C27E C28E C29E 119.3(3) . . ?
 N7F C24F H24F 127.2 . . ?
 C23F C24F N7F 105.6(3) . . ?
 C23F C24F H24F 127.2 . . ?
 N2D C7D H7D 127.1 . . ?
 C8D C7D N2D 105.9(3) . . ?
 C8D C7D H7D 127.1 . . ?
 C28B C27B H27B 121.4 . . ?
 C28B C27B C26B 117.3(3) . . ?
 C26B C27B H27B 121.4 . . ?
 C16I C17I H17I 120.2 . . ?
 C18I C17I C16I 119.7(3) . . ?
 C18I C17I H17I 120.2 . . ?
 C15A C10A N4A 119.3(3) . . ?
 C15A C10A C11A 120.9(3) . . ?
 C11A C10A N4A 119.8(3) . . ?
 O1A C13A C14A 117.9(3) . . ?
 C12A C13A O1A 119.8(3) . . ?
 C12A C13A C14A 122.0(3) . . ?
 C13C C14C H14C 120.1 . . ?
 C13C C14C C15C 119.7(3) . . ?
 C15C C14C H14C 120.1 . . ?
 N3F C6F N2F 111.8(3) . . ?
 N3F C6F H6F 124.1 . . ?
 N2F C6F H6F 124.1 . . ?
 C28H C27H H27H 121.5 . . ?
 C28H C27H C26H 117.1(3) . . ?
 C26H C27H H27H 121.5 . . ?
 N8D C30D C29D 124.1(3) . . ?
 N8D C30D H30D 118.0 . . ?
 C29D C30D H30D 118.0 . . ?
 C3H C2H H2H 120.9 . . ?
 C3H C2H C1H 118.3(3) . . ?
 C1H C2H H2H 120.9 . . ?
 C14F C13F O1F 117.4(3) . . ?
 C12F C13F O1F 122.2(3) . . ?
 C12F C13F C14F 120.1(3) . . ?
 C16E C17E C18E 119.2(3) . . ?
 C16E C17E H17E 120.4 . . ?
 C18E C17E H17E 120.4 . . ?
 C28C C29C H29C 121.1 . . ?
 C30C C29C C28C 117.8(3) . . ?
 C30C C29C H29C 121.1 . . ?
 C17C C16C O1C 119.9(3) . . ?
 C17C C16C C21C 121.5(3) . . ?
 C21C C16C O1C 118.4(3) . . ?
 C14A C15A C10A 119.7(3) . . ?
 C14A C15A H15A 120.2 . . ?
 C10A C15A H15A 120.2 . . ?
 C10C C15C H15C 119.9 . . ?
 C14C C15C C10C 120.1(3) . . ?
 C14C C15C H15C 119.9 . . ?
 N3A C8A C9A 116.4(3) . . ?
 C7A C8A N3A 109.8(3) . . ?
 C7A C8A C9A 133.8(3) . . ?
 N1D C1D C2D 124.5(3) . . ?
 N1D C1D H1D 117.7 . . ?
 C2D C1D H1D 117.7 . . ?
 N4A C9A C8A 116.9(3) . . ?
 N4A C9A H9A 121.6 . . ?
 C8A C9A H9A 121.6 . . ?
 C28B C29B H29B 121.1 . . ?
 C30B C29B C28B 117.9(3) . . ?
 C30B C29B H29B 121.1 . . ?
 C10E C15E C14E 120.0(3) . . ?
 C10E C15E H15E 120.0 . . ?
 C14E C15E H15E 120.0 . . ?
 C10B C15B C14B 119.8(3) . . ?
 C10B C15B H15B 120.1 . . ?
 C14B C15B H15B 120.1 . . ?
 N4F C9F C8F 121.7(3) . . ?
 N4F C9F H9F 119.2 . . ?
 C8F C9F H9F 119.2 . . ?
 C3A C2A H2A 121.0 . . ?
 C1A C2A C3A 117.9(3) . . ?
 C1A C2A H2A 121.0 . . ?
 C18C C17C H17C 120.0 . . ?
 C16C C17C C18C 120.1(3) . . ?
 C16C C17C H17C 120.0 . . ?
 C20C C21C H21C 120.5 . . ?
 C16C C21C C20C 118.9(3) . . ?
 C16C C21C H21C 120.5 . . ?
 N8A C30A H30A 117.9 . . ?
 N8A C30A C29A 124.3(3) . . ?
 C29A C30A H30A 117.9 . . ?
 N1E C1E C2E 124.5(3) . . ?
 N1E C1E H1E 117.8 . . ?
 C2E C1E H1E 117.8 . . ?
 C3G C2G H2G 121.1 . . ?
 C1G C2G C3G 117.8(3) . . ?
 C1G C2G H2G 121.1 . . ?
 C13F C14F H14F 120.2 . . ?
 C13F C14F C15F 119.7(3) . . ?
 C15F C14F H14F 120.2 . . ?
 N1B C1B H1B 118.1 . . ?
 N1B C1B C2B 123.9(3) . . ?
 C2B C1B H1B 118.1 . . ?
 C29F C28F N7F 120.2(3) . . ?
 C29F C28F C27F 119.1(3) . . ?
 C27F C28F N7F 120.7(3) . . ?
 N2A C7A H7A 127.2 . . ?
 C8A C7A N2A 105.7(3) . . ?
 C8A C7A H7A 127.2 . . ?
 C3A C4A H4A 121.3 . . ?
 C3A C4A C5A 117.5(3) . . ?
 C5A C4A H4A 121.3 . . ?
 C28A C27A H27A 121.2 . . ?
 C28A C27A C26A 117.5(3) . . ?
 C26A C27A H27A 121.2 . . ?
 N8B C26B C27B 124.7(3) . . ?
 N8B C26B H26B 117.7 . . ?
 C27B C26B H26B 117.7 . . ?
 C28A C29A C30A 117.6(3) . . ?
 C28A C29A H29A 121.2 . . ?
 C30A C29A H29A 121.2 . . ?
 C3G C4G H4G 121.1 . . ?
 C3G C4G C5G 117.8(3) . . ?
 C5G C4G H4G 121.1 . . ?
 C13D C14D H14D 120.2 . . ?
 C13D C14D C15D 119.6(3) . . ?
 C15D C14D H14D 120.2 . . ?
 C19D C18D H18D 119.8 . . ?
 C19D C18D C17D 120.4(3) . . ?
 C17D C18D H18D 119.8 . . ?
 N8D C26D C27D 123.7(3) . . ?
 N8D C26D H26D 118.2 . . ?
 C27D C26D H26D 118.2 . . ?
 C4I C5I H5I 118.1 . . ?
 N1I C5I C4I 123.9(3) . . ?
 N1I C5I H5I 118.1 . . ?
 C28I C27I H27I 120.9 . . ?
 C28I C27I C26I 118.1(3) . . ?
 C26I C27I H27I 120.9 . . ?
 C10C C11C H11C 120.3 . . ?
 C10C C11C C12C 119.5(3) . . ?
 C12C C11C H11C 120.3 . . ?
 N4C C9C C8C 120.6(3) . . ?
 N4C C9C H9C 119.7 . . ?
 C8C C9C H9C 119.7 . . ?
 C3B C2B C1B 118.2(3) . . ?
 C3B C2B H2B 120.9 . . ?
 C1B C2B H2B 120.9 . . ?
 C19A C18A H18A 119.9 . . ?
 C19A C18A C17A 120.3(3) . . ?
 C17A C18A H18A 119.9 . . ?
 N8E C30E C29E 124.7(3) . . ?
 N8E C30E H30E 117.6 . . ?
 C29E C30E H30E 117.6 . . ?
 C28E C27E H27E 120.8 . . ?
 C26E C27E C28E 118.3(3) . . ?
 C26E C27E H27E 120.8 . . ?
 C3C C2C H2C 121.2 . . ?
 C3C C2C C1C 117.7(3) . . ?
 C1C C2C H2C 121.2 . . ?
 N8H C26H C27H 124.8(3) . . ?
 N8H C26H H26H 117.6 . . ?
 C27H C26H H26H 117.6 . . ?
 C19F C18F H18F 120.4 . . ?
 C19F C18F C17F 119.3(4) . . ?
 C17F C18F H18F 120.4 . . ?
 C3C C4C H4C 121.3 . . ?
 C5C C4C C3C 117.4(3) . . ?
 C5C C4C H4C 121.3 . . ?
 C3B C4B H4B 120.9 . . ?
 C3B C4B C5B 118.2(3) . . ?
 C5B C4B H4B 120.9 . . ?
 C28I C29I H29I 121.3 . . ?
 C30I C29I C28I 117.5(3) . . ?
 C30I C29I H29I 121.3 . . ?
 C18F C17F H17F 120.0 . . ?
 C16F C17F C18F 120.1(3) . . ?
 C16F C17F H17F 120.0 . . ?
 N1A C5A C4A 124.9(3) . . ?
 N1A C5A H5A 117.5 . . ?
 C4A C5A H5A 117.5 . . ?
 C10F C15F C14F 120.4(3) . . ?
 C10F C15F H15F 119.8 . . ?
 C14F C15F H15F 119.8 . . ?
 N1E C5E C4E 124.1(3) . . ?
 N1E C5E H5E 117.9 . . ?
 C4E C5E H5E 117.9 . . ?
 C10A C11A H11A 120.2 . . ?
 C12A C11A C10A 119.6(3) . . ?
 C12A C11A H11A 120.2 . . ?
 N1A C1A C2A 124.5(3) . . ?
 N1A C1A H1A 117.7 . . ?
 C2A C1A H1A 117.7 . . ?
 C16A C17A C18A 119.7(3) . . ?
 C16A C17A H17A 120.1 . . ?
 C18A C17A H17A 120.1 . . ?
 N1H C1H C2H 123.8(3) . . ?
 N1H C1H H1H 118.1 . . ?
 C2H C1H H1H 118.1 . . ?
 N8I C26I C27I 123.3(4) . . ?
 N8I C26I H26I 118.4 . . ?
 C27I C26I H26I 118.4 . . ?
 C19F C20F H20F 119.7 . . ?
 C19F C20F C21F 120.5(3) . . ?
 C21F C20F H20F 119.7 . . ?
 N8H C30H H30H 118.0 . . ?
 N8H C30H C29H 124.0(3) . . ?
 C29H C30H H30H 118.0 . . ?
 C28H C29H H29H 121.0 . . ?
 C30H C29H C28H 118.0(3) . . ?
 C30H C29H H29H 121.0 . . ?
 N8B C30B C29B 125.0(3) . . ?
 N8B C30B H30B 117.5 . . ?
 C29B C30B H30B 117.5 . . ?
 N1H C5H C4H 124.6(3) . . ?
 N1H C5H H5H 117.7 . . ?
 C4H C5H H5H 117.7 . . ?
 C16D C17D C18D 118.9(3) . . ?
 C16D C17D H17D 120.5 . . ?
 C18D C17D H17D 120.5 . . ?
 C13A C12A C11A 118.8(3) . . ?
 C13A C12A H12A 120.6 . . ?
 C11A C12A H12A 120.6 . . ?
 C13C C12C C11C 119.3(3) . . ?
 C13C C12C H12C 120.3 . . ?
 C11C C12C H12C 120.3 . . ?
 C17F C16F O1F 119.6(3) . . ?
 C21F C16F O1F 119.2(4) . . ?
 C21F C16F C17F 121.0(3) . . ?
 C10D C15D C14D 119.3(3) . . ?
 C10D C15D H15D 120.3 . . ?
 C14D C15D H15D 120.3 . . ?
 N8C C30C C29C 124.7(3) . . ?
 N8C C30C H30C 117.6 . . ?
 C29C C30C H30C 117.6 . . ?
 N2F C7F H7F 127.0 . . ?
 C8F C7F N2F 106.1(3) . . ?
 C8F C7F H7F 127.0 . . ?
 C28F C29F H29F 121.3 . . ?
 C28F C29F C30F 117.4(4) . . ?
 C30F C29F H29F 121.3 . . ?
 N1G C1G C2G 124.3(3) . . ?
 N1G C1G H1G 117.9 . . ?
 C2G C1G H1G 117.9 . . ?
 N8I C30I C29I 125.0(3) . . ?
 N8I C30I H30I 117.5 . . ?
 C29I C30I H30I 117.5 . . ?
 N1C C5C C4C 124.6(4) . . ?
 N1C C5C H5C 117.7 . . ?
 C4C C5C H5C 117.7 . . ?
 N1G C5G C4G 124.0(4) . . ?
 N1G C5G H5G 118.0 . . ?
 C4G C5G H5G 118.0 . . ?
 N1C C1C C2C 124.3(3) . . ?
 N1C C1C H1C 117.8 . . ?
 C2C C1C H1C 117.8 . . ?
 C13D C12D H12D 120.2 . . ?
 C13D C12D C11D 119.6(3) . . ?
 C11D C12D H12D 120.2 . . ?
 N8A C26A C27A 124.3(3) . . ?
 N8A C26A H26A 117.9 . . ?
 C27A C26A H26A 117.9 . . ?
 N8E C26E C27E 123.9(4) . . ?
 N8E C26E H26E 118.1 . . ?
 C27E C26E H26E 118.1 . . ?
 C10D C11D C12D 120.1(3) . . ?
 C10D C11D H11D 119.9 . . ?
 C12D C11D H11D 119.9 . . ?
 C28C C27C H27C 121.0 . . ?
 C26C C27C C28C 118.0(3) . . ?
 C26C C27C H27C 121.0 . . ?
 N1B C5B C4B 124.4(3) . . ?
 N1B C5B H5B 117.8 . . ?
 C4B C5B H5B 117.8 . . ?
 N8C C26C C27C 124.4(4) . . ?
 N8C C26C H26C 117.8 . . ?
 C27C C26C H26C 117.8 . . ?
 C20F C21F H21F 120.3 . . ?
 C16F C21F C20F 119.4(4) . . ?
 C16F C21F H21F 120.3 . . ?
 C28F C27F H27F 121.0 . . ?
 C26F C27F C28F 118.0(4) . . ?
 C26F C27F H27F 121.0 . . ?
 N8F C26F C27F 124.5(4) . . ?
 N8F C26F H26F 117.8 . . ?
 C27F C26F H26F 117.8 . . ?
 N8F C30F C29F 125.6(4) . . ?
 N8F C30F H30F 117.2 . . ?
 C29F C30F H30F 117.2 . . ?
 C10F C11F H11F 119.9 . . ?
 C10F C11F C12F 120.2(3) . . ?
 C12F C11F H11F 119.9 . . ?
 C13F C12F C11F 119.9(3) . . ?
 C13F C12F H12F 120.1 . . ?
 C11F C12F H12F 120.1 . . ?
 C2F C3F N2F 122.6(3) . . ?
 C2F C3F C4F 118.8(4) . . ?
 C4F C3F N2F 118.3(4) . . ?
 N1F C1F H1F 117.6 . . ?
 N1F C1F C2F 124.8(5) . . ?
 C2F C1F H1F 117.6 . . ?
 C1F N1F C5F 115.6(5) . . ?
 C3F C2F C1F 119.3(4) . . ?
 C3F C2F H2F 120.4 . . ?
 C1F C2F H2F 120.4 . . ?
 F33 B9 F34 109.1(3) . . ?
 F35 B9 F33 109.6(3) . . ?
 F35 B9 F34 108.5(3) . . ?
 F36 B9 F33 109.5(3) . . ?
 F36 B9 F34 110.2(3) . . ?
 F36 B9 F35 109.9(3) . . ?
 N1S4 C1S4 C2S4 177.8(4) . . ?
 C1S4 C2S4 H2SA 109.5 . . ?
 C1S4 C2S4 H2SB 109.5 . . ?
 C1S4 C2S4 H2SC 109.5 . . ?
 H2SA C2S4 H2SB 109.5 . . ?
 H2SA C2S4 H2SC 109.5 . . ?
 H2SB C2S4 H2SC 109.5 . . ?
 C3F C4F H4F 121.1 . . ?
 C3F C4F C5F 117.7(5) . . ?
 C5F C4F H4F 121.1 . . ?
 N1S9 C1S9 C2S9 179.0(5) . . ?
 C1S9 C2S9 H2SD 109.5 . . ?
 C1S9 C2S9 H2SE 109.5 . . ?
 C1S9 C2S9 H2SF 109.5 . . ?
 H2SD C2S9 H2SE 109.5 . . ?
 H2SD C2S9 H2SF 109.5 . . ?
 H2SE C2S9 H2SF 109.5 . . ?
 F31 B8 F29 109.3(3) . . ?
 F31 B8 F30 110.0(3) . . ?
 F32 B8 F31 110.2(3) . . ?
 F32 B8 F29 110.3(3) . . ?
 F32 B8 F30 109.2(4) . . ?
 F30 B8 F29 107.8(3) . . ?
 F12 B3 F9 109.9(3) . . ?
 F11 B3 F9 108.3(3) . . ?
 F11 B3 F12 109.0(3) . . ?
 F10 B3 F9 110.0(3) . . ?
 F10 B3 F12 110.0(3) . . ?
 F10 B3 F11 109.7(4) . . ?
 F8 B2 F5 109.0(3) . . ?
 F8 B2 F6 108.2(3) . . ?
 F7 B2 F8 110.7(3) . . ?
 F7 B2 F5 109.0(3) . . ?
 F7 B2 F6 110.3(3) . . ?
 F6 B2 F5 109.7(3) . . ?
 F44 B11 F41 109.3(3) . . ?
 F44 B11 F43 108.8(3) . . ?
 F42 B11 F44 110.0(3) . . ?
 F42 B11 F41 110.4(3) . . ?
 F42 B11 F43 110.3(3) . . ?
 F43 B11 F41 108.0(3) . . ?
 F13A B4A F14A 111.0(8) . . ?
 F16A B4A F14A 110.3(7) . . ?
 F16A B4A F13A 109.8(7) . . ?
 F16A B4A F15A 109.1(7) . . ?
 F15A B4A F14A 108.8(8) . . ?
 F15A B4A F13A 107.8(7) . . ?
 F19 B4 F28 110.1(13) . . ?
 F25 B4 F28 109.3(12) . . ?
 F25 B4 F19 109.9(12) . . ?
 F25 B4 F26 108.9(10) . . ?
 F26 B4 F28 108.8(12) . . ?
 F26 B4 F19 109.8(12) . . ?
 F21 B6 F24 109.4(3) . . ?
 F22 B6 F21 109.7(3) . . ?
 F22 B6 F24 107.5(3) . . ?
 F23 B6 F21 110.1(3) . . ?
 F23 B6 F22 110.4(3) . . ?
 F23 B6 F24 109.6(3) . . ?
 F25A B7A F28A 109.3(14) . . ?
 F27A B7A F25A 110.2(13) . . ?
 F27A B7A F28A 110.8(13) . . ?
 F26A B7A F25A 111.5(14) . . ?
 F26A B7A F28A 104.6(13) . . ?
 F26A B7A F27A 110.3(11) . . ?
 F2 B1 F4 107.1(4) . . ?
 F1 B1 F2 110.0(3) . . ?
 F1 B1 F4 108.3(4) . . ?
 F3 B1 F2 111.3(4) . . ?
 F3 B1 F1 112.1(4) . . ?
 F3 B1 F4 107.8(4) . . ?
 F46A B12A F45A 109.8(6) . . ?
 F46A B12A F48A 113.1(7) . . ?
 F48A B12A F45A 110.8(7) . . ?
 F47A B12A F45A 103.8(6) . . ?
 F47A B12A F46A 110.7(7) . . ?
 F47A B12A F48A 108.3(7) . . ?
 N1S1 C1S1 C2S1 179.0(5) . . ?
 C1S1 C2S1 H2SG 109.5 . . ?
 C1S1 C2S1 H2SH 109.5 . . ?
 C1S1 C2S1 H2SI 109.5 . . ?
 H2SG C2S1 H2SH 109.5 . . ?
 H2SG C2S1 H2SI 109.5 . . ?
 H2SH C2S1 H2SI 109.5 . . ?
 N1 C1 C2 179.7(4) . . ?
 C1 C2 H2J 109.5 . . ?
 C1 C2 H2K 109.5 . . ?
 C1 C2 H2L 109.5 . . ?
 H2J C2 H2K 109.5 . . ?
 H2J C2 H2L 109.5 . . ?
 H2K C2 H2L 109.5 . . ?
 N1S8 C1S8 C2S8 179.1(4) . . ?
 C1S8 C2S8 H2SJ 109.5 . . ?
 C1S8 C2S8 H2SK 109.5 . . ?
 C1S8 C2S8 H2SL 109.5 . . ?
 H2SJ C2S8 H2SK 109.5 . . ?
 H2SJ C2S8 H2SL 109.5 . . ?
 H2SK C2S8 H2SL 109.5 . . ?
 H2SM C2S5 H2SN 109.5 . . ?
 H2SM C2S5 H2SO 109.5 . . ?
 H2SN C2S5 H2SO 109.5 . . ?
 C1S5 C2S5 H2SM 109.5 . . ?
 C1S5 C2S5 H2SN 109.5 . . ?
 C1S5 C2S5 H2SO 109.5 . . ?
 N1S5 C1S5 C2S5 178.2(5) . . ?
 N1T6 C1T6 C2T6 177.6(6) . . ?
 C1T6 C2T6 H2TA 109.5 . . ?
 C1T6 C2T6 H2TB 109.5 . . ?
 C1T6 C2T6 H2TC 109.5 . . ?
 H2TA C2T6 H2TB 109.5 . . ?
 H2TA C2T6 H2TC 109.5 . . ?
 H2TB C2T6 H2TC 109.5 . . ?
 N1T1 C1T1 C2T1 177.4(5) . . ?
 C1T1 C2T1 H2TD 109.5 . . ?
 C1T1 C2T1 H2TE 109.5 . . ?
 C1T1 C2T1 H2TF 109.5 . . ?
 H2TD C2T1 H2TE 109.5 . . ?
 H2TD C2T1 H2TF 109.5 . . ?
 H2TE C2T1 H2TF 109.5 . . ?
 N1S2 C1S2 C2S2 176.8(5) . . ?
 C1S2 C2S2 H2SP 109.5 . . ?
 C1S2 C2S2 H2SQ 109.5 . . ?
 C1S2 C2S2 H2SR 109.5 . . ?
 H2SP C2S2 H2SQ 109.5 . . ?
 H2SP C2S2 H2SR 109.5 . . ?
 H2SQ C2S2 H2SR 109.5 . . ?
 N1T9 C1T9 C2T9 176.2(8) . . ?
 C1T9 C2T9 H2TG 109.5 . . ?
 C1T9 C2T9 H2TH 109.5 . . ?
 C1T9 C2T9 H2TI 109.5 . . ?
 H2TG C2T9 H2TH 109.5 . . ?
 H2TG C2T9 H2TI 109.5 . . ?
 H2TH C2T9 H2TI 109.5 . . ?
 C2EW O1EW C3EW 113.4(5) . . ?
 H4EA C4EW H4EB 109.5 . . ?
 H4EA C4EW H4EC 109.5 . . ?
 H4EB C4EW H4EC 109.5 . . ?
 C3EW C4EW H4EA 109.5 . . ?
 C3EW C4EW H4EB 109.5 . . ?
 C3EW C4EW H4EC 109.5 . . ?
 O1EW C2EW H2EA 110.2 . . ?
 O1EW C2EW H2EB 110.2 . . ?
 O1EW C2EW C1EW 107.7(6) . . ?
 H2EA C2EW H2EB 108.5 . . ?
 C1EW C2EW H2EA 110.2 . . ?
 C1EW C2EW H2EB 110.2 . . ?
 C2EW C1EW H1EA 109.5 . . ?
 C2EW C1EW H1EB 109.5 . . ?
 C2EW C1EW H1EC 109.5 . . ?
 H1EA C1EW H1EB 109.5 . . ?
 H1EA C1EW H1EC 109.5 . . ?
 H1EB C1EW H1EC 109.5 . . ?
 O1EW C3EW C4EW 106.5(5) . . ?
 O1EW C3EW H3EA 110.4 . . ?
 O1EW C3EW H3EB 110.4 . . ?
 C4EW C3EW H3EA 110.4 . . ?
 C4EW C3EW H3EB 110.4 . . ?
 H3EA C3EW H3EB 108.6 . . ?
 N1S7 C1S7 C2S7 176.6(6) . . ?
 C1S7 C2S7 H2SS 109.5 . . ?
 C1S7 C2S7 H2ST 109.5 . . ?
 C1S7 C2S7 H2SU 109.5 . . ?
 H2SS C2S7 H2ST 109.5 . . ?
 H2SS C2S7 H2SU 109.5 . . ?
 H2ST C2S7 H2SU 109.5 . . ?
 H2TJ C2T4 H2TK 109.5 . . ?
 H2TJ C2T4 H2TL 109.5 . . ?
 H2TK C2T4 H2TL 109.5 . . ?
 C1T4 C2T4 H2TJ 109.5 . . ?
 C1T4 C2T4 H2TK 109.5 . . ?
 C1T4 C2T4 H2TL 109.5 . . ?
 N1T4 C1T4 C2T4 179.8(6) . . ?
 C2EU O1EU C3EU 112.0(5) . . ?
 O1EU C3EU H3EC 108.7 . . ?
 O1EU C3EU H3ED 108.7 . . ?
 O1EU C3EU C4EU 114.0(5) . . ?
 H3EC C3EU H3ED 107.6 . . ?
 C4EU C3EU H3EC 108.7 . . ?
 C4EU C3EU H3ED 108.7 . . ?
 H1ED C1EU H1EE 109.5 . . ?
 H1ED C1EU H1EF 109.5 . . ?
 H1EE C1EU H1EF 109.5 . . ?
 C2EU C1EU H1ED 109.5 . . ?
 C2EU C1EU H1EE 109.5 . . ?
 C2EU C1EU H1EF 109.5 . . ?
 O1EU C2EU C1EU 107.4(5) . . ?
 O1EU C2EU H2EC 110.2 . . ?
 O1EU C2EU H2ED 110.2 . . ?
 C1EU C2EU H2EC 110.2 . . ?
 C1EU C2EU H2ED 110.2 . . ?
 H2EC C2EU H2ED 108.5 . . ?
 C3EU C4EU H4ED 109.5 . . ?
 C3EU C4EU H4EE 109.5 . . ?
 C3EU C4EU H4EF 109.5 . . ?
 H4ED C4EU H4EE 109.5 . . ?
 H4ED C4EU H4EF 109.5 . . ?
 H4EE C4EU H4EF 109.5 . . ?
 N1S3 C1S3 C2S3 178.3(6) . . ?
 C1S3 C2S3 H2SV 109.5 . . ?
 C1S3 C2S3 H2SW 109.5 . . ?
 C1S3 C2S3 H2SX 109.5 . . ?
 H2SV C2S3 H2SW 109.5 . . ?
 H2SV C2S3 H2SX 109.5 . . ?
 H2SW C2S3 H2SX 109.5 . . ?
 H2SY C2S6 H 109.5 . . ?
 H2SY C2S6 HA 109.5 . . ?
 H C2S6 HA 109.5 . . ?
 C1S6 C2S6 H2SY 109.5 . . ?
 C1S6 C2S6 H 109.5 . . ?
 C1S6 C2S6 HA 109.5 . . ?
 N1S6 C1S6 C2S6 177.4(5) . . ?
 H2EE C2ET H2EF 107.3 . . ?
 O1ET C2ET H2EE 108.2 . . ?
 O1ET C2ET H2EF 108.2 . . ?
 O1ET C2ET C1ET 116.5(7) . . ?
 C1ET C2ET H2EE 108.2 . . ?
 C1ET C2ET H2EF 108.2 . . ?
 C2ET O1ET C3ET 124.7(7) . . ?
 O1ET C3ET H3EE 109.7 . . ?
 O1ET C3ET H3EF 109.7 . . ?
 O1ET C3ET C4ET 109.6(7) . . ?
 H3EE C3ET H3EF 108.2 . . ?
 C4ET C3ET H3EE 109.7 . . ?
 C4ET C3ET H3EF 109.7 . . ?
 C2ET C1ET H1EG 109.5 . . ?
 C2ET C1ET H1EH 109.5 . . ?
 C2ET C1ET H1EI 109.5 . . ?
 H1EG C1ET H1EH 109.5 . . ?
 H1EG C1ET H1EI 109.5 . . ?
 H1EH C1ET H1EI 109.5 . . ?
 C3ET C4ET H4EG 109.5 . . ?
 C3ET C4ET H4EH 109.5 . . ?
 C3ET C4ET H4EI 109.5 . . ?
 H4EG C4ET H4EH 109.5 . . ?
 H4EG C4ET H4EI 109.5 . . ?
 H4EH C4ET H4EI 109.5 . . ?
 N1F C5F C4F 122.9(6) . . ?
 N1F C5F H5F 118.6 . . ?
 C4F C5F H5F 118.6 . . ?
 F17A B5A F20A 109.5 . . ?
 F19A B5A F17A 109.5 . . ?
 F19A B5A F20A 109.5 . . ?
 F18A B5A F17A 109.4 . . ?
 F18A B5A F19A 109.5 . . ?
 F18A B5A F20A 109.4 . . ?
 F19B B5B F17B 109.4 . . ?
 F20B B5B F17B 109.6 . . ?
 F20B B5B F19B 109.5 . . ?
 F20B B5B F18B 109.5 . . ?
 F18B B5B F17B 109.5 . . ?
 F18B B5B F19B 109.4 . . ?
 F25B B7B F27B 106.5(10) . . ?
 F28B B7B F25B 111.8(10) . . ?
 F28B B7B F27B 105.1(9) . . ?
 F26B B7B F25B 109.5(10) . . ?
 F26B B7B F28B 113.8(11) . . ?
 F26B B7B F27B 109.8(9) . . ?
 F16B B4B F14B 110.2(15) . . ?
 F16B B4B F13B 114.0(15) . . ?
 F16B B4B F15B 111.6(13) . . ?
 F13B B4B F14B 111.3(17) . . ?
 F13B B4B F15B 101.8(13) . . ?
 F15B B4B F14B 107.5(14) . . ?
 F24A B2A F23A 109.8(12) . . ?
 F20 B2A F23A 108.8(11) . . ?
 F20 B2A F24A 109.8(12) . . ?
 F20 B2A F15 109.6(10) . . ?
 F15 B2A F23A 109.8(11) . . ?
 F15 B2A F24A 109.0(12) . . ?
 F46B B12B F47B 109.2(13) . . ?
 F46B B12B F45B 112.2(13) . . ?
 F48B B12B F47B 118.1(16) . . ?
 F48B B12B F46B 110.6(13) . . ?
 F48B B12B F45B 106.5(15) . . ?
 F45B B12B F47B 99.8(13) . . ?
 O1EV C2EV C1EV 108.8 . . ?
 C2EV O1EV C3EV 113.5 . . ?
 O1EV C3EV C4EV 108.8 . . ?
 H2TM C2T3 H2TN 109.5 . . ?
 H2TM C2T3 H2TO 109.5 . . ?
 H2TN C2T3 H2TO 109.5 . . ?
 C1T3 C2T3 H2TM 109.5 . . ?
 C1T3 C2T3 H2TN 109.5 . . ?
 C1T3 C2T3 H2TO 109.5 . . ?
 N1T5 C1T5 C2T5 173(3) . . ?
 C1T5 C2T5 H2TP 109.5 . . ?
 C1T5 C2T5 H2TQ 109.5 . . ?
 C1T5 C2T5 H2TR 109.5 . . ?
 H2TP C2T5 H2TQ 109.5 . . ?
 H2TP C2T5 H2TR 109.5 . . ?
 H2TQ C2T5 H2TR 109.5 . . ?
 N1T3 C1T3 C2T3 176(3) . . ?
 N1T2 C1T2 C2T2 179.9 . . ?
 C1T2 C2T2 H2TS 109.5 . . ?
 C1T2 C2T2 H2TT 109.5 . . ?
 C1T2 C2T2 H2TU 109.5 . . ?
 H2TS C2T2 H2TT 109.5 . . ?
 H2TS C2T2 H2TU 109.5 . . ?
 H2TT C2T2 H2TU 109.5 . . ?
 N1T8 C1T8 C2T8 179.84(6) . . ?
 C1T8 C2T8 H2TV 109.5 . . ?
 C1T8 C2T8 H2TW 109.5 . . ?
 C1T8 C2T8 H2TX 109.5 . . ?
 H2TV C2T8 H2TW 109.5 . . ?
 H2TV C2T8 H2TX 109.5 . . ?
 H2TW C2T8 H2TX 109.5 . . ?
 N1T7 C1T7 C2T7 179.9 . . ?
 C1T7 C2T7 H2TY 109.5 . . ?
 C1T7 C2T7 HB 109.5 . . ?
 C1T7 C2T7 HC 109.5 . . ?
 H2TY C2T7 HB 109.5 . . ?
 H2TY C2T7 HC 109.5 . . ?
 HB C2T7 HC 109.5 . . ?
 C37 N1I C5I 116.8(3) . . ?

loop_
  _geom_torsion_atom_site_label_1
  _geom_torsion_atom_site_label_2
  _geom_torsion_atom_site_label_3
  _geom_torsion_atom_site_label_4
  _geom_torsion
  _geom_torsion_site_symmetry_1
  _geom_torsion_site_symmetry_2
  _geom_torsion_site_symmetry_3
  _geom_torsion_site_symmetry_4
  _geom_torsion_publ_flag
 Cu2 N5B C22B C23B 6.8(3) . . . . ?
 Cu2 N5B C19B C20B -72.7(3) . . . . ?
 Cu2 N5B C19B C18B 106.3(3) . . . . ?
 Cu2 N6A C23A C24A 173.79(19) . . . . ?
 Cu2 N6A C23A C22A -1.0(3) . . . . ?
 Cu2 N6A C25A N7A -172.32(18) . . . . ?
 Cu2 N6B C23B C22B -3.1(3) . . . . ?
 Cu2 N6B C23B C24B 178.01(19) . . . . ?
 Cu2 N6B C25B N7B -177.6(2) . . . . ?
 Cu2 N5C C22C C23C -0.3(3) . . . . ?
 Cu2 N5C C19C C20C -50.0(3) . . . . ?
 Cu2 N5C C19C C18C 129.3(3) . . . . ?
 Cu2 N6C C23C C22C -1.7(3) . . . . ?
 Cu2 N6C C23C C24C 178.6(2) . . . . ?
 Cu2 N6C C25C N7C -177.4(3) . . . . ?
 Cu5 N4H C10H C15H 58.1(3) . . . . ?
 Cu5 N4H C10H C11H -120.9(3) . . . . ?
 Cu5 N4H C9H C8H -1.4(3) . . . . ?
 Cu5 N4G C9G C8G 10.8(4) . . . . ?
 Cu5 N4G C10G C11G -71.6(3) . . . . ?
 Cu5 N4G C10G C15G 107.2(3) . . . . ?
 Cu5 N3H C8H C9H -5.3(3) . . . . ?
 Cu5 N3H C8H C7H 172.9(2) . . . . ?
 Cu5 N3H C6H N2H -169.5(2) . . . . ?
 Cu5 N3I C8I C7I -168.73(19) . . . . ?
 Cu5 N3I C8I C9I 10.1(3) . . . . ?
 Cu5 N3I C6I N2I 165.5(2) . . . . ?
 Cu5 N3G C8G C9G -6.8(3) . . . . ?
 Cu5 N3G C8G C7G 175.8(2) . . . . ?
 Cu5 N3G C6G N2G -172.2(3) . . . . ?
 Cu6 N5H C22H C23H -6.6(3) . . . . ?
 Cu6 N5H C19H C18H -116.7(3) . . . . ?
 Cu6 N5H C19H C20H 60.6(3) . . . . ?
 Cu6 N6H C23H C22H 5.3(3) . . . . ?
 Cu6 N6H C23H C24H -177.10(19) . . . . ?
 Cu6 N6H C25H N7H 176.8(2) . . . . ?
 Cu6 N6G C23G C24G -170.75(19) . . . . ?
 Cu6 N6G C23G C22G 6.4(4) . . . . ?
 Cu6 N6G C25G N7G 167.8(2) . . . . ?
 Cu6 N5I C22I C23I 9.1(3) . . . . ?
 Cu6 N5I C19I C20I 105.3(3) . . . . ?
 Cu6 N5I C19I C18I -73.3(3) . . . . ?
 Cu6 N6I C23I C22I -6.0(3) . . . . ?
 Cu6 N6I C23I C24I 174.6(2) . . . . ?
 Cu6 N6I C25I N7I -170.7(3) . . . . ?
 Cu4 N5E C22E C23E -4.9(3) . . . . ?
 Cu4 N5E C19E C20E 78.2(3) . . . . ?
 Cu4 N5E C19E C18E -99.9(3) . . . . ?
 Cu4 N6D C25D N7D 173.94(19) . . . . ?
 Cu4 N6D C23D C24D -175.0(2) . . . . ?
 Cu4 N6D C23D C22D -1.2(4) . . . . ?
 Cu4 N6E C23E C22E 1.6(3) . . . . ?
 Cu4 N6E C23E C24E -179.42(19) . . . . ?
 Cu4 N6E C25E N7E 179.7(2) . . . . ?
 Cu4 N5F C22F C23F -2.1(4) . . . . ?
 Cu4 N5F C19F C18F -128.8(3) . . . . ?
 Cu4 N5F C19F C20F 49.8(4) . . . . ?
 Cu4 N6F C23F C22F 4.7(3) . . . . ?
 Cu4 N6F C23F C24F -174.9(2) . . . . ?
 Cu4 N6F C25F N7F 171.3(3) . . . . ?
 Cu3 N3E C8E C9E -1.9(4) . . . . ?
 Cu3 N3E C8E C7E 179.6(2) . . . . ?
 Cu3 N3E C6E N2E -179.3(2) . . . . ?
 Cu3 N3D C6D N2D -172.7(3) . . . . ?
 Cu3 N3D C8D C9D -7.0(4) . . . . ?
 Cu3 N3D C8D C7D 175.5(2) . . . . ?
 Cu3 N4E C10E C11E -122.3(3) . . . . ?
 Cu3 N4E C10E C15E 56.0(4) . . . . ?
 Cu3 N4E C9E C8E -4.1(3) . . . . ?
 Cu3 N4D C10D C15D 84.0(4) . . . . ?
 Cu3 N4D C10D C11D -96.3(4) . . . . ?
 Cu3 N4D C9D C8D 5.8(4) . . . . ?
 Cu3 N4F C10F C15F 78.3(4) . . . . ?
 Cu3 N4F C10F C11F -105.8(4) . . . . ?
 Cu3 N4F C9F C8F -0.9(4) . . . . ?
 Cu3 N3F C8F C9F 0.4(4) . . . . ?
 Cu3 N3F C8F C7F -179.4(3) . . . . ?
 Cu3 N3F C6F N2F 178.0(3) . . . . ?
 Cu1 N3A C6A N2A 177.0(2) . . . . ?
 Cu1 N3A C8A C9A 4.7(4) . . . . ?
 Cu1 N3A C8A C7A -177.4(2) . . . . ?
 Cu1 N3B C6B N2B 178.4(2) . . . . ?
 Cu1 N3B C8B C7B -178.8(2) . . . . ?
 Cu1 N3B C8B C9B 0.1(4) . . . . ?
 Cu1 N4C C10C C15C -94.4(3) . . . . ?
 Cu1 N4C C10C C11C 84.6(4) . . . . ?
 Cu1 N4C C9C C8C -6.5(4) . . . . ?
 Cu1 N3C C8C C7C 173.4(2) . . . . ?
 Cu1 N3C C8C C9C -2.9(3) . . . . ?
 Cu1 N3C C6C N2C -167.1(3) . . . . ?
 Cu1 N4B C10B C11B 123.7(3) . . . . ?
 Cu1 N4B C10B C15B -53.6(4) . . . . ?
 Cu1 N4B C9B C8B 6.6(4) . . . . ?
 Cu1 N4A C10A C15A -68.8(4) . . . . ?
 Cu1 N4A C10A C11A 111.3(3) . . . . ?
 Cu1 N4A C9A C8A -1.0(4) . . . . ?
 O1I C13I C14I C15I 178.1(2) . . . . ?
 O1I C13I C12I C11I -177.2(2) . . . . ?
 O1I C16I C21I C20I -179.4(3) . . . . ?
 O1I C16I C17I C18I -179.3(3) . . . . ?
 O1G C16G C17G C18G -177.4(3) . . . . ?
 O1G C13G C12G C11G -179.6(3) . . . . ?
 O1H C16H C17H C18H 176.6(3) . . . . ?
 O1H C16H C21H C20H -178.1(2) . . . . ?
 O1B C16B C17B C18B -175.8(3) . . . . ?
 O1B C13B C14B C15B -179.8(3) . . . . ?
 O1B C13B C12B C11B 179.4(3) . . . . ?
 O1E C16E C17E C18E 175.2(3) . . . . ?
 O1E C13E C14E C15E 179.4(3) . . . . ?
 O1E C13E C12E C11E -179.9(3) . . . . ?
 O1A C16A C21A C20A 178.9(3) . . . . ?
 O1A C16A C17A C18A -177.2(3) . . . . ?
 O1A C13A C12A C11A -175.6(3) . . . . ?
 O1D C13D C14D C15D -175.5(3) . . . . ?
 O1D C13D C12D C11D 175.3(4) . . . . ?
 O1D C16D C17D C18D 177.2(3) . . . . ?
 N5B C19B C18B C17B 179.6(3) . . . . ?
 O1C C13C C14C C15C 175.7(3) . . . . ?
 O1C C13C C12C C11C -176.9(3) . . . . ?
 O1C C16C C17C C18C -178.8(3) . . . . ?
 O1C C16C C21C C20C 178.5(3) . . . . ?
 N5H C19H C18H C17H 175.9(3) . . . . ?
 N5H C19H C20H C21H -177.4(2) . . . . ?
 N4H C10H C15H C14H -179.4(2) . . . . ?
 N4H C10H C11H C12H 177.9(3) . . . . ?
 N6H C23H C22H N5H 1.0(4) . . . . ?
 N6H C23H C24H N7H -1.1(3) . . . . ?
 N4G C9G C8G N3G -1.4(4) . . . . ?
 N4G C9G C8G C7G 175.4(3) . . . . ?
 N4G C10G C15G C14G -180.0(3) . . . . ?
 N3H C8H C9H N4H 4.5(4) . . . . ?
 N3H C8H C7H N2H -0.4(3) . . . . ?
 N7A C28A C27A C26A -179.6(3) . . . . ?
 N7A C28A C29A C30A 179.8(3) . . . . ?
 N7D C28D C27D C26D -178.3(3) . . . . ?
 N7D C28D C29D C30D 178.9(3) . . . . ?
 N6A C23A C24A N7A -0.8(3) . . . . ?
 N6A C23A C22A N5A 1.6(4) . . . . ?
 N6G C23G C22G N5G 1.0(4) . . . . ?
 N5E C19E C20E C21E 179.2(3) . . . . ?
 N5E C19E C18E C17E 179.6(3) . . . . ?
 N2H C3H C4H C5H 178.6(3) . . . . ?
 N2H C3H C2H C1H -179.8(3) . . . . ?
 N6B C23B C22B N5B -2.5(4) . . . . ?
 N6B C23B C24B N7B 0.6(3) . . . . ?
 N7H C28H C27H C26H -178.8(3) . . . . ?
 N7H C28H C29H C30H 178.8(3) . . . . ?
 N6D C23D C24D N7D 0.5(3) . . . . ?
 N6D C23D C22D N5D 0.3(5) . . . . ?
 N3I C8I C7I N2I -0.1(3) . . . . ?
 N3I C8I C9I N4I -6.0(4) . . . . ?
 N7I C28I C27I C26I -179.6(3) . . . . ?
 N7I C28I C29I C30I 178.7(3) . . . . ?
 N2G C3G C2G C1G -177.9(3) . . . . ?
 N2G C3G C4G C5G 177.8(3) . . . . ?
 N2D C3D C4D C5D 178.9(3) . . . . ?
 N2D C3D C2D C1D -178.4(3) . . . . ?
 N2I C3I C4I C5I 179.7(3) . . . . ?
 N7G C24G C23G N6G 0.3(3) . . . . ?
 N7G C24G C23G C22G -176.6(3) . . . . ?
 N7G C28G C27G C26G -178.9(3) . . . . ?
 N7G C28G C29G C30G 180.0(3) . . . . ?
 N7E C28E C27E C26E 179.8(3) . . . . ?
 N6E C23E C22E N5E 2.3(4) . . . . ?
 N6E C23E C24E N7E -0.7(3) . . . . ?
 N3E C8E C9E N4E 4.5(4) . . . . ?
 N3E C8E C7E N2E -0.1(3) . . . . ?
 N7B C28B C27B C26B 179.7(3) . . . . ?
 N7B C28B C29B C30B -179.1(3) . . . . ?
 N5I C19I C18I C17I -180.0(3) . . . . ?
 N6I C23I C22I N5I -1.4(4) . . . . ?
 N6I C23I C24I N7I 0.4(3) . . . . ?
 N7C C28C C29C C30C -176.3(3) . . . . ?
 N7C C28C C27C C26C 177.5(3) . . . . ?
 N5C C19C C20C C21C 177.9(3) . . . . ?
 N5C C19C C18C C17C -178.2(3) . . . . ?
 N2C C3C C2C C1C -179.3(3) . . . . ?
 N2C C3C C4C C5C -179.3(3) . . . . ?
 N2E C3E C4E C5E -177.8(3) . . . . ?
 N2E C3E C2E C1E 177.0(3) . . . . ?
 N3D C8D C9D N4D 0.9(5) . . . . ?
 N3D C8D C7D N2D -0.2(4) . . . . ?
 N3A C8A C9A N4A -2.5(5) . . . . ?
 N3A C8A C7A N2A -0.9(4) . . . . ?
 N2A C3A C2A C1A 179.1(3) . . . . ?
 N2A C3A C4A C5A 179.4(3) . . . . ?
 O1F C13F C14F C15F -173.2(3) . . . . ?
 O1F C13F C12F C11F 172.3(4) . . . . ?
 O1F C16F C21F C20F -177.1(3) . . . . ?
 N4E C10E C11E C12E 177.8(3) . . . . ?
 N4E C10E C15E C14E -178.3(3) . . . . ?
 N3G C8G C7G N2G 0.2(3) . . . . ?
 N7F C28F C29F C30F 178.0(4) . . . . ?
 N7F C28F C27F C26F -178.3(4) . . . . ?
 N3B C8B C7B N2B 0.0(4) . . . . ?
 N3B C8B C9B N4B -5.3(5) . . . . ?
 N2B C3B C2B C1B -178.2(3) . . . . ?
 N2B C3B C4B C5B 179.0(3) . . . . ?
 N4D C10D C15D C14D 178.3(3) . . . . ?
 N4D C10D C11D C12D -178.3(4) . . . . ?
 N4F C10F C15F C14F 174.3(3) . . . . ?
 N4F C10F C11F C12F -175.0(4) . . . . ?
 N5F C22F C23F N6F -2.3(4) . . . . ?
 N5F C22F C23F C24F 177.3(3) . . . . ?
 N5F C19F C18F C17F 177.9(3) . . . . ?
 N5F C19F C20F C21F -178.2(3) . . . . ?
 N5G C19G C20G C21G -175.7(3) . . . . ?
 N5G C19G C18G C17G 175.2(3) . . . . ?
 N6C C23C C22C N5C 1.5(4) . . . . ?
 N6C C23C C24C N7C 0.0(3) . . . . ?
 N8G C30G C29G C28G -1.2(5) . . . . ?
 N5A C19A C20A C21A 172.4(3) . . . . ?
 N5A C19A C18A C17A -170.7(3) . . . . ?
 N4C C10C C15C C14C -177.3(3) . . . . ?
 N4C C10C C11C C12C 176.2(3) . . . . ?
 N3C C8C C7C N2C 0.2(4) . . . . ?
 N3C C8C C9C N4C 6.6(5) . . . . ?
 N4B C10B C11B C12B -177.7(3) . . . . ?
 N4B C10B C15B C14B 177.3(3) . . . . ?
 N4A C10A C15A C14A 177.6(3) . . . . ?
 N4A C10A C11A C12A -177.1(3) . . . . ?
 N6F C23F C24F N7F -0.4(4) . . . . ?
 N3F C8F C9F N4F 0.3(5) . . . . ?
 N3F C8F C7F N2F 0.5(4) . . . . ?
 N5D C19D C18D C17D 173.2(3) . . . . ?
 N8A C30A C29A C28A 0.2(5) . . . . ?
 C23H N6H C25H N7H -0.3(3) . . . . ?
 N2F C3F C2F C1F -178.7(4) . . . . ?
 N2F C3F C4F C5F 178.2(5) . . . . ?
 C13I O1I C16I C21I -168.9(2) . . . . ?
 C13I O1I C16I C17I 11.2(4) . . . . ?
 C23E N6E C25E N7E -0.3(3) . . . . ?
 C10H N4H C9H C8H -177.2(2) . . . . ?
 C10H C15H C14H C13H 1.7(4) . . . . ?
 C10H C11H C12H C13H 1.2(4) . . . . ?
 C22H N5H C19H C18H 54.9(4) . . . . ?
 C22H N5H C19H C20H -127.8(3) . . . . ?
 C22H C23H C24H N7H 175.9(3) . . . . ?
 C8H N3H C6H N2H -0.5(3) . . . . ?
 C23B N6B C25B N7B 0.0(3) . . . . ?
 N1B C1B C2B C3B -1.0(6) . . . . ?
 C22E N5E C19E C20E -107.6(3) . . . . ?
 C22E N5E C19E C18E 74.2(4) . . . . ?
 C22E C23E C24E N7E 178.1(3) . . . . ?
 C11G C10G C15G C14G -1.2(4) . . . . ?
 C9G N4G C10G C11G 123.6(3) . . . . ?
 C9G N4G C10G C15G -57.6(4) . . . . ?
 C9G C8G C7G N2G -176.9(3) . . . . ?
 C21G C16G C17G C18G 3.2(4) . . . . ?
 C10G N4G C9G C8G 176.5(2) . . . . ?
 C10G C11G C12G C13G -2.4(4) . . . . ?
 C19H N5H C22H C23H -179.3(2) . . . . ?
 C23C N6C C25C N7C 0.7(3) . . . . ?
 C8G N3G C6G N2G 0.0(3) . . . . ?
 C16G O1G C13G C14G -171.5(3) . . . . ?
 C16G O1G C13G C12G 8.8(4) . . . . ?
 C16G C21G C20G C19G 0.9(4) . . . . ?
 C16G C17G C18G C19G -0.1(4) . . . . ?
 C16H O1H C13H C12H 75.8(3) . . . . ?
 C16H O1H C13H C14H -107.4(3) . . . . ?
 C16H C17H C18H C19H 1.2(4) . . . . ?
 C16H C21H C20H C19H 1.5(4) . . . . ?
 C24G N7G C25G N6G 0.0(3) . . . . ?
 C24G N7G C28G C27G 17.8(4) . . . . ?
 C24G N7G C28G C29G -161.9(3) . . . . ?
 C24G C23G C22G N5G 177.6(3) . . . . ?
 C22B N5B C19B C20B 115.4(3) . . . . ?
 C22B N5B C19B C18B -65.5(4) . . . . ?
 C22B C23B C24B N7B -177.9(3) . . . . ?
 C17H C16H C21H C20H -1.6(4) . . . . ?
 C23I N6I C25I N7I -0.7(3) . . . . ?
 C16I O1I C13I C14I -102.3(3) . . . . ?
 C16I O1I C13I C12I 76.9(3) . . . . ?
 C23G N6G C25G N7G 0.2(3) . . . . ?
 C9H N4H C10H C15H -126.9(3) . . . . ?
 C9H N4H C10H C11H 54.0(4) . . . . ?
 C9H C8H C7H N2H 177.4(3) . . . . ?
 C21B C16B C17B C18B 0.9(5) . . . . ?
 C21B C20B C19B N5B -178.6(2) . . . . ?
 C21B C20B C19B C18B 2.4(4) . . . . ?
 C18H C19H C20H C21H -0.1(4) . . . . ?
 C8I N3I C6I N2I -1.2(3) . . . . ?
 C25G N6G C23G C24G -0.3(3) . . . . ?
 C25G N6G C23G C22G 176.9(3) . . . . ?
 C25G N7G C24G C23G -0.2(3) . . . . ?
 C25G N7G C28G C27G -163.1(3) . . . . ?
 C25G N7G C28G C29G 17.2(4) . . . . ?
 C24H N7H C25H N6H -0.4(3) . . . . ?
 C24H N7H C28H C27H -28.1(4) . . . . ?
 C24H N7H C28H C29H 151.0(3) . . . . ?
 C24H C23H C22H N5H -175.8(3) . . . . ?
 C23A N6A C25A N7A -0.1(3) . . . . ?
 C20I C19I C18I C17I 1.4(5) . . . . ?
 C24A N7A C28A C27A -3.5(4) . . . . ?
 C24A N7A C28A C29A 176.1(3) . . . . ?
 C24A N7A C25A N6A -0.4(3) . . . . ?
 C24A C23A C22A N5A -172.0(3) . . . . ?
 C28A N7A C24A C23A -175.1(3) . . . . ?
 C28A N7A C25A N6A 175.5(2) . . . . ?
 C28A C27A C26A N8A -0.6(6) . . . . ?
 C24E N7E C25E N6E -0.1(3) . . . . ?
 C24E N7E C28E C29E 160.1(3) . . . . ?
 C24E N7E C28E C27E -18.7(4) . . . . ?
 C24E C23E C22E N5E -176.5(3) . . . . ?
 C22C N5C C19C C20C 131.5(3) . . . . ?
 C22C N5C C19C C18C -49.3(4) . . . . ?
 C22C C23C C24C N7C -179.8(3) . . . . ?
 C16B O1B C13B C14B 109.1(3) . . . . ?
 C16B O1B C13B C12B -71.7(4) . . . . ?
 C16B C21B C20B C19B -1.6(4) . . . . ?
 C16B C17B C18B C19B -0.2(5) . . . . ?
 N8H C30H C29H C28H 0.7(6) . . . . ?
 C28D N7D C25D N6D -172.9(3) . . . . ?
 C28D N7D C24D C23D 172.7(3) . . . . ?
 C28D C27D C26D N8D -0.7(5) . . . . ?
 C28D C29D C30D N8D -0.8(5) . . . . ?
 C21H C16H C17H C18H 0.2(4) . . . . ?
 C20B C21B C16B O1B 176.9(3) . . . . ?
 C20B C21B C16B C17B 0.0(5) . . . . ?
 C20B C19B C18B C17B -1.4(5) . . . . ?
 C8E N3E C6E N2E 0.1(3) . . . . ?
 C8C N3C C6C N2C 0.8(3) . . . . ?
 C25B N6B C23B C22B 178.4(2) . . . . ?
 C25B N6B C23B C24B -0.4(3) . . . . ?
 C25B N7B C24B C23B -0.6(3) . . . . ?
 C25B N7B C28B C27B -159.1(3) . . . . ?
 C25B N7B C28B C29B 21.5(4) . . . . ?
 C28G N7G C24G C23G 179.0(3) . . . . ?
 C28G N7G C25G N6G -179.2(3) . . . . ?
 C28G C27G C26G N8G -1.2(5) . . . . ?
 C6I N3I C8I C7I 0.8(3) . . . . ?
 C6I N3I C8I C9I 179.6(3) . . . . ?
 C6I N2I C7I C8I -0.6(3) . . . . ?
 C6I N2I C3I C2I -41.9(4) . . . . ?
 C6I N2I C3I C4I 138.9(3) . . . . ?
 C15H C10H C11H C12H -1.1(4) . . . . ?
 C15H C14H C13H O1H -178.1(2) . . . . ?
 C15H C14H C13H C12H -1.5(4) . . . . ?
 C19A N5A C22A C23A 175.3(2) . . . . ?
 C19A C18A C17A C16A -1.2(5) . . . . ?
 C14G C13G C12G C11G 0.8(4) . . . . ?
 C24C N7C C25C N6C -0.7(3) . . . . ?
 C24C N7C C28C C29C -160.8(3) . . . . ?
 C24C N7C C28C C27C 20.9(5) . . . . ?
 C24C C23C C22C N5C -178.8(3) . . . . ?
 C21E C16E C17E C18E -2.5(5) . . . . ?
 C10I N4I C9I C8I -177.4(2) . . . . ?
 C10I C15I C14I C13I -1.0(4) . . . . ?
 C10I C11I C12I C13I -0.7(4) . . . . ?
 C14I C13I C12I C11I 2.0(4) . . . . ?
 C14I C15I C10I N4I -176.3(2) . . . . ?
 C14I C15I C10I C11I 2.2(4) . . . . ?
 C6D N2D C3D C4D -174.9(3) . . . . ?
 C6D N2D C3D C2D 4.0(5) . . . . ?
 C6D N2D C7D C8D -0.1(4) . . . . ?
 C6D N3D C8D C9D 177.9(3) . . . . ?
 C6D N3D C8D C7D 0.4(4) . . . . ?
 C3G N2G C6G N3G 179.6(3) . . . . ?
 C3G N2G C7G C8G -179.6(3) . . . . ?
 C3G C2G C1G N1G 0.0(5) . . . . ?
 C3G C4G C5G N1G 0.2(5) . . . . ?
 C19G N5G C22G C23G -176.0(3) . . . . ?
 C7I N2I C6I N3I 1.1(3) . . . . ?
 C7I N2I C3I C2I 142.5(3) . . . . ?
 C7I N2I C3I C4I -36.6(4) . . . . ?
 C7I C8I C9I N4I 172.6(3) . . . . ?
 C25D N7D C28D C27D 178.2(3) . . . . ?
 C25D N7D C28D C29D -1.6(4) . . . . ?
 C25D N7D C24D C23D -0.5(3) . . . . ?
 C25D N6D C23D C24D -0.4(3) . . . . ?
 C25D N6D C23D C22D 173.4(3) . . . . ?
 C16A O1A C13A C14A 114.9(3) . . . . ?
 C16A O1A C13A C12A -70.7(4) . . . . ?
 C16A C21A C20A C19A -1.8(5) . . . . ?
 C3H N2H C6H N3H 178.6(3) . . . . ?
 C3H N2H C7H C8H -178.3(3) . . . . ?
 C3H C4H C5H N1H 0.8(5) . . . . ?
 C3H C2H C1H N1H 1.9(6) . . . . ?
 C6B N3B C8B C7B 0.2(3) . . . . ?
 C6B N3B C8B C9B 179.1(3) . . . . ?
 C6B N2B C3B C2B 3.9(5) . . . . ?
 C6B N2B C3B C4B -175.8(3) . . . . ?
 C6B N2B C7B C8B -0.2(3) . . . . ?
 C24B N7B C25B N6B 0.4(3) . . . . ?
 C24B N7B C28B C27B 21.2(4) . . . . ?
 C24B N7B C28B C29B -158.2(3) . . . . ?
 C24B C23B C22B N5B 176.0(3) . . . . ?
 C19B N5B C22B C23B 179.6(2) . . . . ?
 C20H C19H C18H C17H -1.3(4) . . . . ?
 C6H N3H C8H C9H -177.6(3) . . . . ?
 C6H N3H C8H C7H 0.5(3) . . . . ?
 C6H N2H C3H C4H 174.0(3) . . . . ?
 C6H N2H C3H C2H -6.6(5) . . . . ?
 C6H N2H C7H C8H 0.1(3) . . . . ?
 C27G C28G C29G C30G 0.3(4) . . . . ?
 C21A C16A C17A C18A -1.0(5) . . . . ?
 C15G C14G C13G O1G -179.1(3) . . . . ?
 C15G C14G C13G C12G 0.6(4) . . . . ?
 C3E N2E C6E N3E -177.9(3) . . . . ?
 C3E N2E C7E C8E 177.9(3) . . . . ?
 C3E C4E C5E N1E 0.9(5) . . . . ?
 C3E C2E C1E N1E 0.8(5) . . . . ?
 C10E N4E C9E C8E -173.9(3) . . . . ?
 C12I C13I C14I C15I -1.1(4) . . . . ?
 C12I C11I C10I N4I 177.2(3) . . . . ?
 C12I C11I C10I C15I -1.3(4) . . . . ?
 C11H C10H C15H C14H -0.4(4) . . . . ?
 C11H C12H C13H O1H 176.7(3) . . . . ?
 C11H C12H C13H C14H 0.1(4) . . . . ?
 C25A N7A C24A C23A 0.7(3) . . . . ?
 C25A N7A C28A C27A -178.5(3) . . . . ?
 C25A N7A C28A C29A 1.1(4) . . . . ?
 C25A N6A C23A C24A 0.5(3) . . . . ?
 C25A N6A C23A C22A -174.3(2) . . . . ?
 C20D C21D C16D O1D -177.9(3) . . . . ?
 C20D C21D C16D C17D -2.1(5) . . . . ?
 C20D C19D C18D C17D -1.6(5) . . . . ?
 C10B N4B C9B C8B 175.7(3) . . . . ?
 C10B C11B C12B C13B 1.2(5) . . . . ?
 C22I N5I C19I C20I -59.6(4) . . . . ?
 C22I N5I C19I C18I 121.8(3) . . . . ?
 C22I C23I C24I N7I -178.8(3) . . . . ?
 C25H N6H C23H C22H -176.8(2) . . . . ?
 C25H N6H C23H C24H 0.9(3) . . . . ?
 C25H N7H C24H C23H 0.9(3) . . . . ?
 C25H N7H C28H C27H 152.9(3) . . . . ?
 C25H N7H C28H C29H -28.0(4) . . . . ?
 C2I C3I C4I C5I 0.6(4) . . . . ?
 C2I C37 N1I C5I 1.5(5) . . . . ?
 C13D O1D C16D C21D -126.7(3) . . . . ?
 C13D O1D C16D C17D 57.4(4) . . . . ?
 C13D C14D C15D C10D 0.1(6) . . . . ?
 C13D C12D C11D C10D 0.0(7) . . . . ?
 C25I N7I C28I C27I 151.6(3) . . . . ?
 C25I N7I C28I C29I -27.2(4) . . . . ?
 C25I N7I C24I C23I -0.8(3) . . . . ?
 C25I N6I C23I C22I 179.5(3) . . . . ?
 C25I N6I C23I C24I 0.2(3) . . . . ?
 C6E N3E C8E C9E 178.5(3) . . . . ?
 C6E N3E C8E C7E 0.0(3) . . . . ?
 C6E N2E C3E C4E 169.3(3) . . . . ?
 C6E N2E C3E C2E -9.0(5) . . . . ?
 C6E N2E C7E C8E 0.2(3) . . . . ?
 C7H N2H C3H C4H -7.9(5) . . . . ?
 C7H N2H C3H C2H 171.5(3) . . . . ?
 C7H N2H C6H N3H 0.2(3) . . . . ?
 C7H C8H C9H N4H -173.1(3) . . . . ?
 C20A C19A C18A C17A 1.9(5) . . . . ?
 C22G N5G C19G C20G -136.3(3) . . . . ?
 C22G N5G C19G C18G 46.0(4) . . . . ?
 C20G C21G C16G O1G 177.0(2) . . . . ?
 C20G C21G C16G C17G -3.6(4) . . . . ?
 C20G C19G C18G C17G -2.5(4) . . . . ?
 C6G N2G C3G C2G 6.3(4) . . . . ?
 C6G N2G C3G C4G -171.8(3) . . . . ?
 C6G N2G C7G C8G -0.2(3) . . . . ?
 C6G N3G C8G C9G 177.3(3) . . . . ?
 C6G N3G C8G C7G -0.1(3) . . . . ?
 C9I N4I C10I C15I -145.3(3) . . . . ?
 C9I N4I C10I C11I 36.1(4) . . . . ?
 C9I C8I C7I N2I -178.8(3) . . . . ?
 C21D C20D C19D N5D -174.0(3) . . . . ?
 C21D C20D C19D C18D 1.0(5) . . . . ?
 C21D C16D C17D C18D 1.5(5) . . . . ?
 C16E O1E C13E C14E -100.5(3) . . . . ?
 C16E O1E C13E C12E 80.1(4) . . . . ?
 C16E C21E C20E C19E 1.2(4) . . . . ?
 C3D N2D C6D N3D -179.8(3) . . . . ?
 C3D N2D C7D C8D -179.9(3) . . . . ?
 C3D C4D C5D N1D -0.6(5) . . . . ?
 C3D C2D C1D N1D -0.2(5) . . . . ?
 C22A N5A C19A C20A 119.3(3) . . . . ?
 C22A N5A C19A C18A -68.2(4) . . . . ?
 C22A C23A C24A N7A 173.3(3) . . . . ?
 C13G O1G C16G C21G -117.1(3) . . . . ?
 C13G O1G C16G C17G 63.5(4) . . . . ?
 C13G C14G C15G C10G -0.4(4) . . . . ?
 C8B N3B C6B N2B -0.3(3) . . . . ?
 C10C N4C C9C C8C -178.6(3) . . . . ?
 C10C C11C C12C C13C 1.2(6) . . . . ?
 C19I N5I C22I C23I 175.5(2) . . . . ?
 C19I C20I C21I C16I -0.8(4) . . . . ?
 C19I C18I C17I C16I -1.7(5) . . . . ?
 C28I N7I C25I N6I -179.2(3) . . . . ?
 C28I N7I C24I C23I 179.4(3) . . . . ?
 C28I C27I C26I N8I 1.3(5) . . . . ?
 C28I C29I C30I N8I 0.7(5) . . . . ?
 C23D N6D C25D N7D 0.0(3) . . . . ?
 C24D N7D C28D C27D 6.3(4) . . . . ?
 C24D N7D C28D C29D -173.5(3) . . . . ?
 C24D N7D C25D N6D 0.3(3) . . . . ?
 C24D C23D C22D N5D 172.7(3) . . . . ?
 C25C N7C C24C C23C 0.4(3) . . . . ?
 C25C N7C C28C C29C 20.0(5) . . . . ?
 C25C N7C C28C C27C -158.2(3) . . . . ?
 C25C N6C C23C C22C 179.3(3) . . . . ?
 C25C N6C C23C C24C -0.4(3) . . . . ?
 C19C N5C C22C C23C 178.4(3) . . . . ?
 C19C C20C C21C C16C -0.6(5) . . . . ?
 C19C C18C C17C C16C 1.3(5) . . . . ?
 C9E N4E C10E C11E 44.2(4) . . . . ?
 C9E N4E C10E C15E -137.4(3) . . . . ?
 C9E C8E C7E N2E -178.4(3) . . . . ?
 C22F N5F C19F C18F 46.7(4) . . . . ?
 C22F N5F C19F C20F -134.7(3) . . . . ?
 C22F C23F C24F N7F -179.9(3) . . . . ?
 C19E N5E C22E C23E -179.8(2) . . . . ?
 C19E C18E C17E C16E 1.1(5) . . . . ?
 C3I N2I C6I N3I -175.0(3) . . . . ?
 C3I N2I C7I C8I 175.7(3) . . . . ?
 C3I C2I C37 N1I -1.6(5) . . . . ?
 C3I C4I C5I N1I -0.7(5) . . . . ?
 C4I C5I N1I C37 -0.3(5) . . . . ?
 C12G C11G C10G N4G -178.6(3) . . . . ?
 C12G C11G C10G C15G 2.6(4) . . . . ?
 C13B O1B C16B C21B 150.1(3) . . . . ?
 C13B O1B C16B C17B -33.0(4) . . . . ?
 C13B C14B C15B C10B -0.3(5) . . . . ?
 C21I C16I C17I C18I 0.7(5) . . . . ?
 C21I C20I C19I N5I -178.8(3) . . . . ?
 C21I C20I C19I C18I -0.2(4) . . . . ?
 C10F N4F C9F C8F 179.9(3) . . . . ?
 C10F C11F C12F C13F 0.9(8) . . . . ?
 C14B C13B C12B C11B -1.5(5) . . . . ?
 C16D O1D C13D C14D -133.1(3) . . . . ?
 C16D O1D C13D C12D 50.2(5) . . . . ?
 C13C O1C C16C C17C -77.7(4) . . . . ?
 C13C O1C C16C C21C 106.7(3) . . . . ?
 C13C C14C C15C C10C 1.0(5) . . . . ?
 C23F N6F C25F N7F -0.9(3) . . . . ?
 C7G N2G C3G C2G -174.4(3) . . . . ?
 C7G N2G C3G C4G 7.6(5) . . . . ?
 C7G N2G C6G N3G 0.1(3) . . . . ?
 C14A C13A C12A C11A -1.4(5) . . . . ?
 C18G C19G C20G C21G 2.0(4) . . . . ?
 C13E O1E C16E C21E -159.4(3) . . . . ?
 C13E O1E C16E C17E 22.8(4) . . . . ?
 C13E C14E C15E C10E 0.7(5) . . . . ?
 C13E C12E C11E C10E 0.2(5) . . . . ?
 C20C C19C C18C C17C 1.1(4) . . . . ?
 C7E N2E C3E C4E -8.0(5) . . . . ?
 C7E N2E C3E C2E 173.6(3) . . . . ?
 C7E N2E C6E N3E -0.2(3) . . . . ?
 C7E C8E C9E N4E -177.3(3) . . . . ?
 C19D N5D C22D C23D -174.4(3) . . . . ?
 C19D C20D C21D C16D 0.8(5) . . . . ?
 C19D C18D C17D C16D 0.4(5) . . . . ?
 C24I N7I C25I N6I 0.9(3) . . . . ?
 C24I N7I C28I C27I -28.6(5) . . . . ?
 C24I N7I C28I C29I 152.6(3) . . . . ?
 C24I C23I C22I N5I 177.8(3) . . . . ?
 C6A N3A C8A C9A -177.2(3) . . . . ?
 C6A N3A C8A C7A 0.7(4) . . . . ?
 C6A N2A C3A C2A -6.5(5) . . . . ?
 C6A N2A C3A C4A 172.6(3) . . . . ?
 C6A N2A C7A C8A 0.7(4) . . . . ?
 C3B N2B C6B N3B -179.1(3) . . . . ?
 C3B N2B C7B C8B 179.3(3) . . . . ?
 C3B C4B C5B N1B -0.6(6) . . . . ?
 C28B N7B C25B N6B -179.4(3) . . . . ?
 C28B N7B C24B C23B 179.2(3) . . . . ?
 C28B C27B C26B N8B 0.0(5) . . . . ?
 C28B C29B C30B N8B -1.2(6) . . . . ?
 C28H N7H C24H C23H -178.2(3) . . . . ?
 C28H N7H C25H N6H 178.7(3) . . . . ?
 C28H C27H C26H N8H -0.8(5) . . . . ?
 C19F N5F C22F C23F -177.9(3) . . . . ?
 C19F C18F C17F C16F 0.0(5) . . . . ?
 C19F C20F C21F C16F 0.7(6) . . . . ?
 C13H O1H C16H C17H 41.9(4) . . . . ?
 C13H O1H C16H C21H -141.6(3) . . . . ?
 C4H C3H C2H C1H -0.4(5) . . . . ?
 C14E C13E C12E C11E 0.7(5) . . . . ?
 C8D N3D C6D N2D -0.4(3) . . . . ?
 C8F N3F C6F N2F 0.3(4) . . . . ?
 C12E C13E C14E C15E -1.2(5) . . . . ?
 C11B C10B C15B C14B -0.1(5) . . . . ?
 C20E C21E C16E O1E -176.5(3) . . . . ?
 C20E C21E C16E C17E 1.3(5) . . . . ?
 C20E C19E C18E C17E 1.5(5) . . . . ?
 C37 C2I C3I N2I -178.6(3) . . . . ?
 C37 C2I C3I C4I 0.5(4) . . . . ?
 C22D N5D C19D C20D -126.1(3) . . . . ?
 C22D N5D C19D C18D 59.0(4) . . . . ?
 C22D C23D C24D N7D -172.5(3) . . . . ?
 C4D C3D C2D C1D 0.5(5) . . . . ?
 C25E N7E C24E C23E 0.5(3) . . . . ?
 C25E N7E C28E C29E -20.5(4) . . . . ?
 C25E N7E C28E C27E 160.7(3) . . . . ?
 C25E N6E C23E C22E -178.4(3) . . . . ?
 C25E N6E C23E C24E 0.6(3) . . . . ?
 C10D N4D C9D C8D -179.2(3) . . . . ?
 C28C N7C C24C C23C -178.8(3) . . . . ?
 C28C N7C C25C N6C 178.6(3) . . . . ?
 C28C C29C C30C N8C -1.6(6) . . . . ?
 C28C C27C C26C N8C -1.1(7) . . . . ?
 C25F N7F C24F C23F -0.2(4) . . . . ?
 C25F N7F C28F C29F -27.4(5) . . . . ?
 C25F N7F C28F C27F 150.4(3) . . . . ?
 C25F N6F C23F C22F -179.6(3) . . . . ?
 C25F N6F C23F C24F 0.8(4) . . . . ?
 C18C C19C C20C C21C -1.4(5) . . . . ?
 C11E C10E C15E C14E 0.1(5) . . . . ?
 C30G N8G C26G C27G 0.4(5) . . . . ?
 C27D C28D C29D C30D -0.9(5) . . . . ?
 C5D N1D C1D C2D -0.5(5) . . . . ?
 C7B N2B C6B N3B 0.3(3) . . . . ?
 C7B N2B C3B C2B -175.4(3) . . . . ?
 C7B N2B C3B C4B 4.9(5) . . . . ?
 C7B C8B C9B N4B 173.3(3) . . . . ?
 C4E C3E C2E C1E -1.3(5) . . . . ?
 C3A N2A C6A N3A 179.6(3) . . . . ?
 C3A N2A C7A C8A -179.2(3) . . . . ?
 C3A C2A C1A N1A 1.5(5) . . . . ?
 C3A C4A C5A N1A 1.8(5) . . . . ?
 C29G C28G C27G C26G 0.9(4) . . . . ?
 C29D C28D C27D C26D 1.6(5) . . . . ?
 C12B C13B C14B C15B 1.1(5) . . . . ?
 C6C N2C C7C C8C 0.3(4) . . . . ?
 C6C N2C C3C C2C 36.5(5) . . . . ?
 C6C N2C C3C C4C -142.9(3) . . . . ?
 C6C N3C C8C C7C -0.6(4) . . . . ?
 C6C N3C C8C C9C -176.9(3) . . . . ?
 C7C N2C C6C N3C -0.7(4) . . . . ?
 C7C N2C C3C C2C -147.1(3) . . . . ?
 C7C N2C C3C C4C 33.5(5) . . . . ?
 C7C C8C C9C N4C -169.0(3) . . . . ?
 C9D N4D C10D C15D -90.0(4) . . . . ?
 C9D N4D C10D C11D 89.6(4) . . . . ?
 C9D C8D C7D N2D -177.3(4) . . . . ?
 C2D C3D C4D C5D -0.1(5) . . . . ?
 C18E C19E C20E C21E -2.6(4) . . . . ?
 C26G N8G C30G C29G 0.9(5) . . . . ?
 C3C N2C C6C N3C 176.3(3) . . . . ?
 C3C N2C C7C C8C -176.7(3) . . . . ?
 C3C C2C C1C N1C -0.9(6) . . . . ?
 C3C C4C C5C N1C -2.2(7) . . . . ?
 C29E C28E C27E C26E 1.0(5) . . . . ?
 C2E C3E C4E C5E 0.6(5) . . . . ?
 C9B N4B C10B C11B -42.2(4) . . . . ?
 C9B N4B C10B C15B 140.5(3) . . . . ?
 C9B C8B C7B N2B -178.8(3) . . . . ?
 C28E N7E C24E C23E 180.0(3) . . . . ?
 C28E N7E C25E N6E -179.6(3) . . . . ?
 C28E C29E C30E N8E 1.4(6) . . . . ?
 C28E C27E C26E N8E -0.4(5) . . . . ?
 C24F N7F C25F N6F 0.7(4) . . . . ?
 C24F N7F C28F C29F 155.0(4) . . . . ?
 C24F N7F C28F C27F -27.2(5) . . . . ?
 C7D N2D C6D N3D 0.3(3) . . . . ?
 C7D N2D C3D C4D 4.9(5) . . . . ?
 C7D N2D C3D C2D -176.1(3) . . . . ?
 C7D C8D C9D N4D 177.8(4) . . . . ?
 C27B C28B C29B C30B 1.5(5) . . . . ?
 C17I C16I C21I C20I 0.6(4) . . . . ?
 C10A N4A C9A C8A 176.8(3) . . . . ?
 C10A C11A C12A C13A -1.0(5) . . . . ?
 C13A O1A C16A C21A 140.6(3) . . . . ?
 C13A O1A C16A C17A -43.0(5) . . . . ?
 C13A C14A C15A C10A 0.0(5) . . . . ?
 C14C C13C C12C C11C 3.6(6) . . . . ?
 C6F N3F C8F C9F 179.3(3) . . . . ?
 C6F N3F C8F C7F -0.5(4) . . . . ?
 C6F N2F C7F C8F -0.3(4) . . . . ?
 C6F N2F C3F C2F -13.7(6) . . . . ?
 C6F N2F C3F C4F 160.5(4) . . . . ?
 C27H C28H C29H C30H -2.1(5) . . . . ?
 C30D N8D C26D C27D -0.9(5) . . . . ?
 C2H C3H C4H C5H -0.8(5) . . . . ?
 C13F O1F C16F C17F 72.4(4) . . . . ?
 C13F O1F C16F C21F -111.9(4) . . . . ?
 C13F C14F C15F C10F 0.4(5) . . . . ?
 C29C C28C C27C C26C -0.7(6) . . . . ?
 C16C O1C C13C C14C 165.8(3) . . . . ?
 C16C O1C C13C C12C -13.7(5) . . . . ?
 C15A C14A C13A O1A 176.2(3) . . . . ?
 C15A C14A C13A C12A 1.9(5) . . . . ?
 C15A C10A C11A C12A 3.0(5) . . . . ?
 C15C C10C C11C C12C -4.9(5) . . . . ?
 C8A N3A C6A N2A -0.2(3) . . . . ?
 C1D N1D C5D C4D 0.9(5) . . . . ?
 C9A N4A C10A C15A 113.9(4) . . . . ?
 C9A N4A C10A C11A -66.1(4) . . . . ?
 C9A C8A C7A N2A 176.5(4) . . . . ?
 C29B C28B C27B C26B -0.9(4) . . . . ?
 C15E C10E C11E C12E -0.6(5) . . . . ?
 C15B C10B C11B C12B -0.4(5) . . . . ?
 C9F N4F C10F C15F -102.6(4) . . . . ?
 C9F N4F C10F C11F 73.3(4) . . . . ?
 C9F C8F C7F N2F -179.3(3) . . . . ?
 C2A C3A C4A C5A -1.4(5) . . . . ?
 C17C C16C C21C C20C 3.1(5) . . . . ?
 C21C C16C C17C C18C -3.4(5) . . . . ?
 C30A N8A C26A C27A 0.3(6) . . . . ?
 C1E N1E C5E C4E -1.5(5) . . . . ?
 C2G C3G C4G C5G -0.3(5) . . . . ?
 C14F C13F C12F C11F -2.0(7) . . . . ?
 C1B N1B C5B C4B 1.2(6) . . . . ?
 C28F N7F C25F N6F -177.2(3) . . . . ?
 C28F N7F C24F C23F 177.7(3) . . . . ?
 C28F C29F C30F N8F -0.2(7) . . . . ?
 C28F C27F C26F N8F 0.8(7) . . . . ?
 C7A N2A C6A N3A -0.3(3) . . . . ?
 C7A N2A C3A C2A 173.4(3) . . . . ?
 C7A N2A C3A C4A -7.5(5) . . . . ?
 C7A C8A C9A N4A -179.7(4) . . . . ?
 C4A C3A C2A C1A -0.1(5) . . . . ?
 C27A C28A C29A C30A -0.6(5) . . . . ?
 C26B N8B C30B C29B 0.4(6) . . . . ?
 C29A C28A C27A C26A 0.8(5) . . . . ?
 C4G C3G C2G C1G 0.2(5) . . . . ?
 C14D C13D C12D C11D -1.3(6) . . . . ?
 C26D N8D C30D C29D 1.7(5) . . . . ?
 C27I C28I C29I C30I -0.1(5) . . . . ?
 C11C C10C C15C C14C 3.8(5) . . . . ?
 C9C N4C C10C C15C 76.8(4) . . . . ?
 C9C N4C C10C C11C -104.2(4) . . . . ?
 C9C C8C C7C N2C 176.1(3) . . . . ?
 C2B C3B C4B C5B -0.7(5) . . . . ?
 C18A C19A C20A C21A -0.3(5) . . . . ?
 C30E N8E C26E C27E 0.3(5) . . . . ?
 C30E C29E C28E N7E 179.7(3) . . . . ?
 C30E C29E C28E C27E -1.4(5) . . . . ?
 C2C C3C C4C C5C 1.3(6) . . . . ?
 C26H N8H C30H C29H 0.5(5) . . . . ?
 C18F C19F C20F C21F 0.4(5) . . . . ?
 C18F C17F C16F O1F 176.8(3) . . . . ?
 C18F C17F C16F C21F 1.1(5) . . . . ?
 C4C C3C C2C C1C 0.2(5) . . . . ?
 C4B C3B C2B C1B 1.5(5) . . . . ?
 C29I C28I C27I C26I -0.8(5) . . . . ?
 C17F C16F C21F C20F -1.4(6) . . . . ?
 C5A N1A C1A C2A -1.3(5) . . . . ?
 C15F C10F C11F C12F 0.9(7) . . . . ?
 C5E N1E C1E C2E 0.6(5) . . . . ?
 C11A C10A C15A C14A -2.5(5) . . . . ?
 C1A N1A C5A C4A -0.4(5) . . . . ?
 C17A C16A C21A C20A 2.5(5) . . . . ?
 C1H N1H C5H C4H 0.6(5) . . . . ?
 C26I N8I C30I C29I -0.3(6) . . . . ?
 C20F C19F C18F C17F -0.7(5) . . . . ?
 C30H N8H C26H C27H -0.5(5) . . . . ?
 C29H C28H C27H C26H 2.1(5) . . . . ?
 C30B N8B C26B C27B 0.3(5) . . . . ?
 C5H N1H C1H C2H -2.0(5) . . . . ?
 C12C C13C C14C C15C -4.8(5) . . . . ?
 C16F O1F C13F C14F -141.7(3) . . . . ?
 C16F O1F C13F C12F 43.9(6) . . . . ?
 C15D C10D C11D C12D 1.3(6) . . . . ?
 C30C N8C C26C C27C 1.5(6) . . . . ?
 C7F N2F C6F N3F 0.0(4) . . . . ?
 C7F N2F C3F C2F 164.0(4) . . . . ?
 C7F N2F C3F C4F -21.9(6) . . . . ?
 C7F C8F C9F N4F -180.0(4) . . . . ?
 C29F C28F C27F C26F -0.4(6) . . . . ?
 C1G N1G C5G C4G 0.0(5) . . . . ?
 C30I N8I C26I C27I -0.7(5) . . . . ?
 C5C N1C C1C C2C 0.1(6) . . . . ?
 C5G N1G C1G C2G -0.1(5) . . . . ?
 C1C N1C C5C C4C 1.5(7) . . . . ?
 C12D C13D C14D C15D 1.2(6) . . . . ?
 C26A N8A C30A C29A 0.0(5) . . . . ?
 C26E N8E C30E C29E -0.8(6) . . . . ?
 C11D C10D C15D C14D -1.3(6) . . . . ?
 C27C C28C C29C C30C 1.9(5) . . . . ?
 C5B N1B C1B C2B -0.3(5) . . . . ?
 C26C N8C C30C C29C -0.1(6) . . . . ?
 C27F C28F C29F C30F 0.2(6) . . . . ?
 C26F N8F C30F C29F 0.5(7) . . . . ?
 C30F N8F C26F C27F -0.8(7) . . . . ?
 C11F C10F C15F C14F -1.5(6) . . . . ?
 C12F C13F C14F C15F 1.3(6) . . . . ?
 C3F N2F C6F N3F 177.9(3) . . . . ?
 C3F N2F C7F C8F -178.3(3) . . . . ?
 C3F C4F C5F N1F 0.2(9) . . . . ?
 C1F N1F C5F C4F 7.0(9) . . . . ?
 N1F C1F C2F C3F 0.5(7) . . . . ?
 C2F C3F C4F C5F -7.4(7) . . . . ?
 C2F C1F N1F C5F -7.5(7) . . . . ?
 C4F C3F C2F C1F 7.3(6) . . . . ?
 C2EW O1EW C3EW C4EW 176.7(6) . . . . ?
 C3EW O1EW C2EW C1EW -174.8(6) . . . . ?
 C3EU O1EU C2EU C1EU 175.1(5) . . . . ?
 C2EU O1EU C3EU C4EU -87.0(8) . . . . ?
 C2ET O1ET C3ET C4ET 86.1(10) . . . . ?
 C1ET C2ET O1ET C3ET 177.8(7) . . . . ?
 C1EV C2EV O1EV C3EV 180.0 . . . . ?
 C2EV O1EV C3EV C4EV 179.9 . . . . ?

_smtbx_masks_special_details
;
A solvent mask was calculated and 85 electrons were 
found in a volume of 331 A^3 in 1 void per unit cell. 
This is attributed to the presence of an unknown
combination of solvent molecules per Asymmetric Unit 
which for which low residual electron density
prevented modelling.
;
loop_
  _smtbx_masks_void_nr
  _smtbx_masks_void_average_x
  _smtbx_masks_void_average_y
  _smtbx_masks_void_average_z
  _smtbx_masks_void_volume
  _smtbx_masks_void_count_electrons
  _smtbx_masks_void_content
 1 0.500 0.000 0.000 330.6 85.4 '2 Unknown'

_shelx_res_file
;
TITL cut83_a.res in P-1
    cut83_a.res
    created by SHELXL-2018/3 at 22:52:31 on 01-Dec-2022
REM Old TITL cut83 in P-1
REM SHELXT solution in P-1: R1 0.161, Rweak 0.005, Alpha 0.063
REM <I/s> 0.000 for 0 systematic absences, Orientation as input
REM Formula found by SHELXT: C705 B22 N152 O16 F66 Cu12
CELL 0.71073 19.95 20.31 40.55 91.677 99.574 94.226
ZERR 6 0.004 0.0041 0.0081 0.03 0.03 0.03
LATT 1
SFAC C H B Cu F N O
UNIT 628.67 541.67 24 12 96 177 24.67
SADI N1F C1F N1F C5F
FLAT C3F C1F N1F C2F C4F C5F
RIGU C3F C1F N1F C2F C4F C5F
SADI C2F C1F C3F C2F C4F C3F C5F C4F
RIGU B12A F45A F46A F48A F47A
SADI B5A F19A B5B F19B
SADI B5A F20A B5B F20B
SADI B5A F17A B5B F17B
SADI 0.04 F17A F19A F17B F19B
SADI 0.04 F17A F18A F17B F18B
SADI 0.04 F19A F20A F19B F20B
SADI B5A F18A B5B F18B
SADI 0.04 F17A F20A F17B F20B
SADI 0.04 F19A F18A F19B F18B
SADI 0.04 F20A F18A F20B F18B
RIGU B5A F17A F19A F20A F18A
RIGU B5B F17B F19B F20B F18B
SADI 0.04 F25A F28A F25A F27A F25A F26A F28A F27A F28A F26A F27A F26A
SADI B7A F25A B7A F28A B7A F27A B7A F26A
RIGU F27A B7A F25A F28A F26A
SADI B7A F25A B7B F25B
SADI 0.04 F28A F27A F28B F27B
SADI B7A F27A B7B F27B
SADI 0.04 F25A F27A F25B F27B
SADI 0.04 F25B F28B F25B F27B F25B F26B F28B F27B F28B F26B F27B F26B
SADI B7A F26A B7B F26B
SADI B7A F28A B7B F28B
RIGU B7B F25B F28B F27B F26B
SADI 0.04 F25A F26A F25B F26B
SADI 0.04 F28A F26A F28B F26B
SADI 0.04 F27A F26A F27B F26B
SADI B7B F25B B7B F28B B7B F27B B7B F26B
SADI 0.04 F25A F28A F25B F28B
SADI F13A B4A F13B B4B
SADI B4A F14A B4A F13A B4A F16A B4A F15A
SADI B4B F16B B4B F14B B4B F13B B4B F15B
SADI 0.04 F13A F15A F13B F15B
SADI F16A B4A F16B B4B
SADI 0.04 F16A F15A F16B F15B
RIGU B4A F14A F13A F16A F15A
SADI 0.04 F13A F16A F13B F16B
SADI F15A B4A F15B B4B
SADI 0.04 F14A F13A F14A F16A F14A F15A F13A F16A F13A F15A F16A F15A
SADI 0.04 F16B F14B F16B F13B F16B F15B F14B F15B F13B F15B
SADI 0.04 F14A F13A F14B F13B
SADI F14A B4A F14B B4B
SADI 0.04 F14A F16A F14B F16B
RIGU F16B B4B F14B F13B F15B
SADI 0.04 F14A F15A F14B F15B
EADP B4B B4A
SADI 0.04 F28 F19 F28 F25 F28 F26 F19 F25 F19 F26 F25 F26
SADI B4 F28 B4 F19 B4 F25 B4 F26
SADI 0.04 F19 F26 F24A F15
SADI B4 F26 B2A F15
RIGU B4 F28 F19 F25 F26
SADI B2A F23A B2A F24A B2A F20 B2A F15
SADI B4 F19 B2A F24A
SADI 0.04 F25 F26 F20 F15
SADI 0.04 F28 F19 F23A F24A
SADI 0.04 F28 F25 F23A F20
SADI 0.04 F28 F26 F23A F15
SADI 0.04 F23A F24A F23A F20 F23A F15 F24A F20 F24A F15 F20 F15
SADI B4 F28 B2A F23A
SADI B4 F25 B2A F20
SADI 0.04 F19 F25 F24A F20
RIGU B2A F23A F24A F20 F15
SADI B12A F45A B12A F46A B12A F48A B12A F47A
SADI 0.04 F45A F46A F45A F48A F45A F47A F46A F48A F46A F47A F48A F47A
SADI B12A F47A B12B F45B
SADI F46A B12A F46B B12B
SADI F48A B12A F48B B12B
SADI 0.04 F45A F46A F47B F46B
RIGU B12B F47B F46B F48B F45B
SADI 0.04 F45A F47A F47B F45B
SADI 0.04 F48A F47A F48B F45B
SADI 0.04 F46A F48A F46B F48B
SADI B12B F47B B12B F46B B12B F48B B12B F45B
SADI 0.04 F47B F46B F47B F48B F47B F45B F46B F48B F46B F45B F48B F45B
SADI 0.04 F45A F48A F47B F48B
SADI F45A B12A F47B B12B
SADI 0.04 F46A F47A F46B F45B
DANG 2.39 O1EW C1EW
DFIX 1.52 C1EW C2EW C3EW C4EW
DANG 2.38 C2EW C3EW
DFIX 1.42 O1EW C2EW O1EW C3EW
DANG 2.39 C4EW O1EW
DFIX 1.45 C1T5 C2T5
DFIX 1.16 N1T5 C1T5
RIGU C2T3 N1T3 C1T3
DFIX 1.16 N1T3 C1T3
RIGU C2T5 N1T5 C1T5
DANG 2.62 C2T5 N1T5
RIGU O1EW C2EW C3EW C1EW C4EW
DANG 2.62 N1T3 C2T3
DFIX 1.45 C1T3 C2T3
DFIX 1.42 O1ET C2ET O1ET C3ET
DANG 2.38 C3ET C2ET
DFIX 1.52 C2ET C1ET C4ET C3ET
DANG 2.39 O1ET C4ET
DANG 2.39 O1ET C1ET
DANG 2.39 O1EU C1EU
DFIX 1.42 O1EU C3EU O1EU C2EU
DANG 2.39 O1EU C4EU
DANG 2.38 C3EU C2EU
DFIX 1.52 C1EU C2EU C4EU C3EU
DFIX 1.45 C1T9 C2T9
DANG 2.62 C2T9 N1T9
RIGU C1T9 N1T9 C2T9
DFIX 1.16 N1T9 C1T9
EADP F14B F14A
EADP C4EW C1T3

L.S. 200
PLAN  99
SIZE 0.4 0.2 0.1
TEMP -173.15
CONF
LIST 6
MORE -1
BOND $H
fmap 2
acta
OMIT 0 0 1
OMIT -2 1 9
OMIT 0 0 2
OMIT 0 -2 6
OMIT 0 -1 5
OMIT -2 0 6
OMIT 0 -6 21
OMIT -1 1 0
OMIT 0 -1 4
REM <olex2.extras>
REM <HklSrc "%.\\cut83_a.hkl">
REM </olex2.extras>

WGHT    0.111100   16.637901
FVAR       0.11632   0.59755   0.44798   0.67998   0.49220   0.66103
CU2   4   -0.087695    1.460147    0.852999    11.00000    0.02649    0.03765 =
         0.02792   -0.00499    0.00775    0.00171
CU5   4    0.260310    1.897681    1.007788    11.00000    0.02712    0.03077 =
         0.03403   -0.00395    0.01217    0.00255
CU6   4    0.409968    1.531477    0.814746    11.00000    0.02718    0.03611 =
         0.02719   -0.00594    0.00673    0.00308
CU4   4    0.744764    1.543713    0.480096    11.00000    0.02970    0.04760 =
         0.02648   -0.00514    0.00745    0.00271
CU3   4    0.602423    1.896096    0.687012    11.00000    0.03350    0.04543 =
         0.03180   -0.00148    0.01244    0.00812
CU1   4    0.029721    1.089958    0.648416    11.00000    0.04069    0.03954 =
         0.03255   -0.00454    0.01485    0.00578
O1I   7    0.147432    1.727071    0.839650    11.00000    0.02948    0.03411 =
         0.03213   -0.00857    0.00500    0.00451
O1G   7    0.487893    1.868941    0.896958    11.00000    0.04400    0.04009 =
         0.03822   -0.01314    0.02210   -0.00990
O1H   7    0.340482    1.568860    0.976941    11.00000    0.05207    0.03650 =
         0.03493    0.00178    0.02153    0.01446
O1B   7   -0.031248    1.435693    0.687019    11.00000    0.05414    0.03625 =
         0.03597    0.00182    0.02316    0.01135
O1E   7    0.661434    1.549923    0.641541    11.00000    0.06109    0.03945 =
         0.04173    0.00512    0.03017    0.01752
O1A   7   -0.209684    1.148699    0.753891    11.00000    0.04749    0.06459 =
         0.04911   -0.02829    0.02489   -0.01788
O1D   7    0.846819    1.863129    0.578795    11.00000    0.04999    0.06664 =
         0.04018   -0.02582    0.02450   -0.02036
N5B   6   -0.140251    1.446696    0.804956    11.00000    0.02986    0.03424 =
         0.02968   -0.00303    0.00772    0.00362
O1C   7    0.157085    1.277406    0.798021    11.00000    0.03351    0.05317 =
         0.06042   -0.02820    0.00861    0.00555
N5H   6    0.463182    1.548897    0.863574    11.00000    0.03062    0.03047 =
         0.02904   -0.00363    0.00829    0.00403
N4H   6    0.221067    1.799155    1.006936    11.00000    0.02879    0.03323 =
         0.02919   -0.00435    0.00893    0.00330
N6H   6    0.505990    1.536648    0.806005    11.00000    0.03084    0.03700 =
         0.02904   -0.00598    0.00518    0.00344
N4G   6    0.361347    1.882894    1.009390    11.00000    0.02953    0.03393 =
         0.03101   -0.00477    0.01053    0.00188
N3H   6    0.166526    1.911990    1.015600    11.00000    0.02972    0.03322 =
         0.03303   -0.00341    0.00953    0.00287
N7A   6    0.016779    1.441701    0.949689    11.00000    0.03179    0.03673 =
         0.03016   -0.00357    0.00703    0.00164
N7D   6    0.654193    1.565245    0.381179    11.00000    0.03841    0.03983 =
         0.02926   -0.00561    0.00637    0.00557
N6A   6   -0.045203    1.440916    0.899334    11.00000    0.02917    0.03467 =
         0.03196   -0.00415    0.00927    0.00273
N6G   6    0.363470    1.540640    0.766121    11.00000    0.03174    0.03660 =
         0.02960   -0.00446    0.00807    0.00424
N5E   6    0.789723    1.552263    0.529344    11.00000    0.03421    0.03822 =
         0.02928   -0.00424    0.00924    0.00477
N2H   6    0.069406    1.934398    1.030685    11.00000    0.02799    0.03637 =
         0.03924   -0.00467    0.01250    0.00495
N6B   6   -0.183565    1.455119    0.862784    11.00000    0.02960    0.03484 =
         0.03104   -0.00420    0.00686    0.00113
N7H   6    0.607971    1.543948    0.792193    11.00000    0.03072    0.03904 =
         0.03126   -0.00224    0.01007    0.00629
N6D   6    0.708387    1.564642    0.433213    11.00000    0.03486    0.04133 =
         0.03029   -0.00570    0.00792    0.00448
N3I   6    0.286480    1.994591    1.001643    11.00000    0.03009    0.03441 =
         0.03026   -0.00438    0.01134    0.00223
N7I   6    0.365237    1.313162    0.807330    11.00000    0.03616    0.03380 =
         0.03706   -0.00573    0.00730    0.00638
N2G   6    0.351842    1.910105    1.118808    11.00000    0.03689    0.03829 =
         0.02954   -0.00386    0.01073    0.00594
N2D   6    0.679278    1.911551    0.791600    11.00000    0.03412    0.04317 =
         0.02961   -0.00491    0.01009    0.00227
N2I   6    0.335581    2.095720    1.003110    11.00000    0.03709    0.03240 =
         0.03155   -0.00721    0.00931    0.00055
N7G   6    0.298482    1.534510    0.716264    11.00000    0.03572    0.03547 =
         0.02761   -0.00570    0.00581    0.00370
N7E   6    0.948656    1.557848    0.465144    11.00000    0.03514    0.04151 =
         0.02921   -0.00291    0.00905    0.00441
N6E   6    0.842938    1.550635    0.474124    11.00000    0.03238    0.04060 =
         0.02895   -0.00385    0.00591    0.00233
N3E   6    0.505574    1.898798    0.694413    11.00000    0.03507    0.03576 =
         0.03505   -0.00341    0.01147    0.00503
N7B   6   -0.286187    1.447978    0.876363    11.00000    0.03041    0.03732 =
         0.03211   -0.00250    0.01053    0.00418
N5I   6    0.312830    1.520660    0.826131    11.00000    0.02932    0.03472 =
         0.02864   -0.00622    0.00452    0.00418
N4I   6    0.240130    1.910306    0.945760    11.00000    0.02745    0.03345 =
         0.03155   -0.00633    0.00883    0.00290
N6I   6    0.391944    1.421178    0.813178    11.00000    0.02872    0.03651 =
         0.03796   -0.00554    0.00663    0.00562
N7C   6   -0.053522    1.679924    0.861411    11.00000    0.03529    0.03336 =
         0.04012   -0.00220    0.01064    0.00237
N5C   6    0.006545    1.476838    0.838684    11.00000    0.02975    0.04043 =
         0.02997   -0.00720    0.00638    0.00251
N2C   6   -0.013862    0.871035    0.666166    11.00000    0.04771    0.03747 =
         0.03263   -0.00532    0.01012    0.00161
N2E   6    0.402937    1.918542    0.703812    11.00000    0.03444    0.03424 =
         0.03751   -0.00399    0.01253    0.00510
N3D   6    0.639937    1.899567    0.737398    11.00000    0.03473    0.04192 =
         0.03341   -0.00461    0.01011    0.00614
N3A   6   -0.000623    1.089825    0.598701    11.00000    0.03959    0.03777 =
         0.03689   -0.00399    0.01264    0.00514
N2A   6   -0.027577    1.085559    0.543862    11.00000    0.04281    0.03930 =
         0.03626   -0.00604    0.01199    0.00604
O1F   7    0.490803    1.721671    0.529243    11.00000    0.03528    0.06656 =
         0.06826   -0.02644    0.00767    0.00842
N4E   6    0.557553    1.779928    0.683117    11.00000    0.03774    0.03734 =
         0.03640   -0.00395    0.01356    0.00712
N3G   6    0.302188    1.900344    1.065601    11.00000    0.03193    0.03763 =
         0.03227   -0.00434    0.01110    0.00465
N7F   6    0.717403    1.323237    0.471884    11.00000    0.03895    0.04178 =
         0.04192   -0.00312    0.01034    0.00222
N3B   6    0.128844    1.082797    0.643974    11.00000    0.04215    0.03379 =
         0.03416   -0.00416    0.01093    0.00487
N2B   6    0.232648    1.060591    0.637032    11.00000    0.04069    0.03519 =
         0.04011   -0.00416    0.01120    0.00491
N4D   6    0.704502    1.888929    0.685371    11.00000    0.03599    0.05274 =
         0.03323   -0.00219    0.01202    0.00689
N4F   6    0.579187    1.905061    0.635932    11.00000    0.03276    0.04057 =
         0.03995   -0.00314    0.01010    0.00078
N5F   6    0.648866    1.524375    0.491622    11.00000    0.03174    0.04807 =
         0.03089   -0.00681    0.00642    0.00346
N5G   6    0.410897    1.654572    0.806464    11.00000    0.03640    0.03477 =
         0.03031   -0.00418    0.00927    0.00126
N6C   6   -0.072357    1.571144    0.858338    11.00000    0.03080    0.03590 =
         0.03964   -0.00342    0.01123    0.00160
N8G   6    0.177151    1.461175    0.625890    11.00000    0.04114    0.04891 =
         0.02910   -0.00532    0.00692   -0.00110
N5A   6   -0.101302    1.333534    0.857509    11.00000    0.03708    0.03476 =
         0.03528   -0.00702    0.01146    0.00126
N4C   6    0.049797    1.083066    0.699186    11.00000    0.04076    0.03796 =
         0.03653   -0.00923    0.01330    0.00205
N3C   6    0.011307    0.974430    0.653899    11.00000    0.03978    0.04035 =
         0.03227   -0.00416    0.01078    0.00378
N4B   6    0.078671    1.203445    0.653114    11.00000    0.04640    0.03420 =
         0.03976   -0.00446    0.01539    0.00384
N4A   6   -0.073972    1.102937    0.646554    11.00000    0.04091    0.04295 =
         0.04196   -0.00475    0.01735    0.00397
N6F   6    0.731786    1.432364    0.473298    11.00000    0.03247    0.04399 =
         0.03719   -0.00486    0.00986    0.00046
N8D   6    0.522938    1.501719    0.292131    11.00000    0.04075    0.06135 =
         0.03012   -0.00509    0.00651   -0.00165
N3F   6    0.618599    2.012643    0.682653    11.00000    0.03828    0.04881 =
         0.03636   -0.00127    0.01231    0.00308
N5D   6    0.760647    1.670735    0.476560    11.00000    0.04314    0.04123 =
         0.03164   -0.00927    0.00812    0.00219
N1E   6    0.233477    2.021412    0.717862    11.00000    0.04279    0.04266 =
         0.05388   -0.00227    0.01478    0.01187
N8A   6    0.151283    1.509738    1.037302    11.00000    0.04067    0.06328 =
         0.03216   -0.00169    0.00413   -0.00368
C23H  1    0.553715    1.555278    0.834430    11.00000    0.02966    0.03259 =
         0.02995   -0.00485    0.00528    0.00371
N2F   6    0.631643    2.118657    0.671485    11.00000    0.05319    0.04467 =
         0.04177   -0.00654    0.01288   -0.00649
C13I  1    0.169366    1.775185    0.865534    11.00000    0.02930    0.03144 =
         0.03034   -0.00538    0.00474    0.00529
N1D   6    0.685261    1.934464    0.895823    11.00000    0.05636    0.03781 =
         0.03327   -0.00541    0.01322   -0.00262
C23E  1    0.886777    1.560552    0.504505    11.00000    0.03510    0.03531 =
         0.02774   -0.00430    0.00682    0.00344
C10H  1    0.251350    1.739666    0.999252    11.00000    0.03327    0.03012 =
         0.03163   -0.00234    0.01400    0.00425
C22H  1    0.527677    1.561827    0.865176    11.00000    0.02919    0.03215 =
         0.03062   -0.00484    0.00563    0.00359
AFIX  43
H22H  2    0.556668    1.575059    0.885688    11.00000   -1.20000
AFIX   0
C8H   1    0.128306    1.853316    1.018229    11.00000    0.03039    0.03522 =
         0.03657   -0.00397    0.01047    0.00095

C23B  1   -0.231574    1.440268    0.833917    11.00000    0.02834    0.03318 =
         0.03094   -0.00316    0.00668    0.00251
N1B   6    0.398796    0.954768    0.620107    11.00000    0.04644    0.05655 =
         0.05393   -0.00204    0.01041    0.01739
C22E  1    0.855233    1.562280    0.533943    11.00000    0.03400    0.03758 =
         0.02939   -0.00217    0.00666    0.00607
AFIX  43
H22E  2    0.881403    1.570401    0.555681    11.00000   -1.20000
AFIX   0

C11G  1    0.378175    1.823018    0.958767    11.00000    0.03299    0.03496 =
         0.03416   -0.00294    0.00935   -0.00025
AFIX  43
H11G  2    0.346299    1.788615    0.963106    11.00000   -1.20000
AFIX   0
C9G   1    0.400901    1.892047    1.037820    11.00000    0.03039    0.03739 =
         0.03205   -0.00446    0.00969    0.00305
AFIX  43
H9G   2    0.448941    1.893167    1.039031    11.00000   -1.20000
AFIX   0
C21G  1    0.516303    1.774400    0.867878    11.00000    0.03680    0.03834 =
         0.03080   -0.00262    0.01008   -0.00246
AFIX  43
H21G  2    0.561753    1.781124    0.879645    11.00000   -1.20000
AFIX   0
C10G  1    0.393197    1.878466    0.980169    11.00000    0.02686    0.03867 =
         0.02995   -0.00444    0.00942    0.00555
C19H  1    0.434271    1.555380    0.893416    11.00000    0.02710    0.03583 =
         0.02610   -0.00274    0.00585    0.00455

C23C  1   -0.010307    1.588612    0.848634    11.00000    0.03023    0.04103 =
         0.03273   -0.00384    0.00861    0.00010
C8G   1    0.372266    1.900610    1.067861    11.00000    0.03194    0.03887 =
         0.03276   -0.00427    0.00939    0.00514
C16G  1    0.468364    1.817479    0.872972    11.00000    0.04336    0.03507 =
         0.02984   -0.00635    0.01640   -0.00436
C16H  1    0.371274    1.567200    0.948667    11.00000    0.03432    0.03770 =
         0.02866   -0.00027    0.00958    0.00978
C24G  1    0.310995    1.600921    0.725354    11.00000    0.04237    0.03554 =
         0.03146   -0.00596    0.00806    0.00531
AFIX  43
H24G  2    0.295058    1.636989    0.712714    11.00000   -1.20000
AFIX   0
C15I  1    0.163094    1.819487    0.920052    11.00000    0.03348    0.03529 =
         0.03109   -0.00309    0.00960    0.00415
AFIX  43
H15I  2    0.142782    1.819041    0.939645    11.00000   -1.20000
AFIX   0
N1H   6   -0.083812    2.042094    1.061652    11.00000    0.03981    0.05929 =
         0.05237   -0.00677    0.01220    0.01556

C22B  1   -0.205029    1.434901    0.803051    11.00000    0.03189    0.03569 =
         0.03007   -0.00460    0.00493    0.00422
AFIX  43
H22B  2   -0.233977    1.423226    0.782330    11.00000   -1.20000
AFIX   0

C17H  1    0.411713    1.620451    0.940427    11.00000    0.03851    0.03329 =
         0.03266   -0.00653    0.00791    0.00395
AFIX  43
H17H  2    0.417440    1.660744    0.953450    11.00000   -1.20000
AFIX   0
C23I  1    0.324046    1.407201    0.816079    11.00000    0.02983    0.03646 =
         0.03502   -0.00639    0.00645    0.00326
C16I  1    0.190074    1.676597    0.837621    11.00000    0.02676    0.03188 =
         0.03241   -0.00316    0.00991    0.00264

N8E   6    1.115074    1.561719    0.413312    11.00000    0.04670    0.07427 =
         0.05983    0.02053    0.02573    0.02061
N8B   6   -0.438730    1.452108    0.936665    11.00000    0.04471    0.07078 =
         0.04833    0.01422    0.02261    0.02038
C23G  1    0.350934    1.604068    0.756206    11.00000    0.03721    0.03558 =
         0.03135   -0.00191    0.00890    0.00411
C9H   1    0.158970    1.793394    1.012134    11.00000    0.03301    0.03278 =
         0.03417   -0.00445    0.01095   -0.00022
AFIX  43
H9H   2    0.134581    1.751368    1.011941    11.00000   -1.20000
AFIX   0

C21B  1   -0.053791    1.495082    0.734455    11.00000    0.03329    0.03398 =
         0.03828   -0.00021    0.01120    0.00419
AFIX  43
H21B  2   -0.033803    1.533884    0.726291    11.00000   -1.20000
AFIX   0

C18H  1    0.443939    1.613834    0.912607    11.00000    0.03279    0.03426 =
         0.03202   -0.00483    0.00803   -0.00007
AFIX  43
H18H  2    0.472604    1.649590    0.906832    11.00000   -1.20000
AFIX   0

N1A   6   -0.002678    1.073791    0.442329    11.00000    0.07772    0.04562 =
         0.03620   -0.00397    0.01478    0.00979
C8I   1    0.287463    2.013918    0.969105    11.00000    0.03451    0.03538 =
         0.03089   -0.00473    0.01076    0.00323
N8I   6    0.392160    1.111156    0.793372    11.00000    0.08684    0.04172 =
         0.04593   -0.00508    0.00735    0.02023
C25G  1    0.331193    1.500411    0.741650    11.00000    0.03381    0.03438 =
         0.03044   -0.00329    0.00858    0.00631
AFIX  43
H25G  2    0.330776    1.453611    0.741696    11.00000   -1.20000
AFIX   0
C24H  1    0.617175    1.560737    0.826129    11.00000    0.03116    0.03684 =
         0.03187   -0.00451    0.00796    0.00403
AFIX  43
H24H  2    0.659019    1.573398    0.840560    11.00000   -1.20000
AFIX   0
C11I  1    0.244269    1.868810    0.888260    11.00000    0.03423    0.03574 =
         0.03608   -0.00658    0.01105   -0.00032
AFIX  43
H11I  2    0.279739    1.901577    0.886291    11.00000   -1.20000
AFIX   0

C23A  1   -0.043777    1.376291    0.909913    11.00000    0.03312    0.03479 =
         0.03410   -0.00361    0.01182    0.00166
C20I  1    0.215762    1.583721    0.805356    11.00000    0.03574    0.03693 =
         0.03079   -0.00830    0.00760    0.00373
AFIX  43
H20I  2    0.205721    1.555165    0.785900    11.00000   -1.20000
AFIX   0

C24A  1   -0.006187    1.376505    0.940977    11.00000    0.03826    0.03462 =
         0.03415   -0.00005    0.01034    0.00279
AFIX  43
H24A  2    0.002679    1.339259    0.954190    11.00000   -1.20000
AFIX   0
C28A  1    0.062518    1.465313    0.979349    11.00000    0.02993    0.04549 =
         0.02992   -0.00266    0.00772    0.00171

C24E  1    0.952487    1.565556    0.499219    11.00000    0.03302    0.03715 =
         0.03089   -0.00229    0.00698    0.00580
AFIX  43
H24E  2    0.992554    1.572838    0.515606    11.00000   -1.20000
AFIX   0

C22C  1    0.029648    1.537699    0.838906    11.00000    0.02990    0.04034 =
         0.03315   -0.00536    0.01033   -0.00014
AFIX  43
H22C  2    0.072784    1.548878    0.832685    11.00000   -1.20000
AFIX   0
C16B  1   -0.056150    1.434898    0.717125    11.00000    0.03835    0.04242 =
         0.03036    0.00055    0.01371    0.00824

N8H   6    0.758897    1.533616    0.731355    11.00000    0.05168    0.07401 =
         0.04317    0.01273    0.02269    0.02354
C28D  1    0.610559    1.543099    0.350913    11.00000    0.03168    0.04494 =
         0.02876   -0.00641    0.00644    0.00535
C21H  1    0.362647    1.507954    0.929932    11.00000    0.03068    0.03214 =
         0.03579    0.00044    0.00817    0.00419
AFIX  43
H21H  2    0.335627    1.471539    0.936284    11.00000   -1.20000
AFIX   0

C20B  1   -0.080749    1.498305    0.763741    11.00000    0.03042    0.03502 =
         0.03501   -0.00443    0.00826    0.00519
AFIX  43
H20B  2   -0.078315    1.539118    0.776106    11.00000   -1.20000
AFIX   0

C8E   1    0.466231    1.839557    0.693528    11.00000    0.03566    0.03559 =
         0.04032   -0.00221    0.01282    0.00473
C8C   1    0.024826    0.968261    0.688238    11.00000    0.04838    0.03869 =
         0.03338   -0.00470    0.00812    0.00738
C25B  1   -0.217286    1.459441    0.887592    11.00000    0.02902    0.03898 =
         0.02996   -0.00411    0.00815    0.00269
AFIX  43
H25B  2   -0.197036    1.469163    0.910279    11.00000   -1.20000
AFIX   0

C28G  1    0.257611    1.508714    0.685741    11.00000    0.03124    0.04161 =
         0.02859   -0.00583    0.00747    0.00543
C6I   1    0.315063    2.045115    1.021535    11.00000    0.03353    0.03608 =
         0.03088   -0.00455    0.01075    0.00137
AFIX  43
H6I   2    0.320586    2.046155    1.045275    11.00000   -1.20000
AFIX   0
C15H  1    0.313300    1.726156    1.017965    11.00000    0.03277    0.03453 =
         0.03224   -0.00380    0.01031    0.00152
AFIX  43
H15H  2    0.335095    1.755744    1.035758    11.00000   -1.20000
AFIX   0

C19A  1   -0.127760    1.281818    0.833403    11.00000    0.04349    0.03512 =
         0.03375   -0.00573    0.01450   -0.00222
C14G  1    0.468203    1.925910    0.945203    11.00000    0.03422    0.03344 =
         0.03687   -0.00774    0.01298   -0.00220
AFIX  43
H14G  2    0.498420    1.961226    0.940276    11.00000   -1.20000
AFIX   0

C24C  1    0.001967    1.655616    0.850424    11.00000    0.03437    0.03883 =
         0.03675   -0.00394    0.01121    0.00013
AFIX  43
H24C  2    0.040771    1.680456    0.845180    11.00000   -1.20000
AFIX   0

C21E  1    0.696249    1.495084    0.596170    11.00000    0.03475    0.03748 =
         0.03876    0.00116    0.01284    0.00750
AFIX  43
H21E  2    0.678061    1.454772    0.603686    11.00000   -1.20000
AFIX   0

C10I  1    0.215999    1.866602    0.917423    11.00000    0.02993    0.03148 =
         0.03100   -0.00545    0.00597    0.00552
C14I  1    0.139949    1.773062    0.894014    11.00000    0.03000    0.03401 =
         0.03521   -0.00347    0.00844    0.00163
AFIX  43
H14I  2    0.104351    1.740306    0.895801    11.00000   -1.20000
AFIX   0

C6D   1    0.622423    1.904644    0.767021    11.00000    0.03274    0.03949 =
         0.03348   -0.00317    0.01113    0.00412
AFIX  43
H6D   2    0.576764    1.903691    0.770995    11.00000   -1.20000
AFIX   0

N8C   6   -0.093709    1.879040    0.874949    11.00000    0.07767    0.03982 =
         0.06177   -0.00119    0.01677    0.01148
C3G   1    0.359283    1.917127    1.154478    11.00000    0.05006    0.03734 =
         0.02882   -0.00229    0.01278    0.00696
C19G  1    0.430549    1.712075    0.827744    11.00000    0.04066    0.03404 =
         0.02721   -0.00400    0.01185    0.00017
C7I   1    0.317709    2.076137    0.969760    11.00000    0.03778    0.03557 =
         0.03037   -0.00526    0.01070    0.00094
AFIX  43
H7I   2    0.325066    2.101104    0.951056    11.00000   -1.20000
AFIX   0

C25D  1    0.674637    1.527700    0.407916    11.00000    0.03221    0.04115 =
         0.02935   -0.00440    0.00693    0.00407
AFIX  43
H25D  2    0.665605    1.481144    0.408131    11.00000   -1.20000
AFIX   0

C16A  1   -0.179995    1.193436    0.779978    11.00000    0.04247    0.04619 =
         0.04117   -0.01472    0.01747   -0.00978
C3H   1    0.017623    1.971787    1.040850    11.00000    0.03114    0.04258 =
         0.03485   -0.00446    0.01099    0.00837
C6B   1    0.167241    1.035440    0.638084    11.00000    0.03921    0.03612 =
         0.03474   -0.00353    0.01180    0.00350
AFIX  43
H6B   2    0.151860    0.989942    0.634971    11.00000   -1.20000
AFIX   0
C24B  1   -0.295172    1.435335    0.842124    11.00000    0.03127    0.03675 =
         0.03221   -0.00293    0.00605    0.00405
AFIX  43
H24B  2   -0.337150    1.425268    0.827357    11.00000   -1.20000
AFIX   0
C19B  1   -0.111335    1.441573    0.774919    11.00000    0.03069    0.03901 =
         0.02656   -0.00315    0.00754    0.00465

C20H  1    0.393537    1.502127    0.901976    11.00000    0.02850    0.03199 =
         0.03352   -0.00398    0.00618    0.00575
AFIX  43
H20H  2    0.386994    1.462087    0.888726    11.00000   -1.20000
AFIX   0
C6H   1    0.130704    1.959811    1.023274    11.00000    0.03020    0.03472 =
         0.03519   -0.00301    0.01003    0.00255
AFIX  43
H6H   2    0.144975    2.005539    1.023672    11.00000   -1.20000
AFIX   0
C27G  1    0.243402    1.549935    0.659443    11.00000    0.03764    0.04035 =
         0.03237   -0.00295    0.00813   -0.00050
AFIX  43
H27G  2    0.261145    1.594846    0.661312    11.00000   -1.20000
AFIX   0

C21A  1   -0.222930    1.233055    0.792932    11.00000    0.04049    0.04457 =
         0.03765   -0.00604    0.01406   -0.00710
AFIX  43
H21A  2   -0.270242    1.229976    0.783986    11.00000   -1.20000
AFIX   0

C15G  1    0.437659    1.930151    0.973259    11.00000    0.03256    0.03556 =
         0.03543   -0.00995    0.01144   -0.00023
AFIX  43
H15G  2    0.447040    1.968394    0.987834    11.00000   -1.20000
AFIX   0

C3E   1    0.346493    1.953435    0.709504    11.00000    0.03532    0.03736 =
         0.03457   -0.00203    0.01157    0.00838
C10E  1    0.582668    1.720159    0.672828    11.00000    0.03960    0.03570 =
         0.03549   -0.00149    0.01633    0.00649
C12I  1    0.220473    1.822984    0.862062    11.00000    0.03428    0.04038 =
         0.03334   -0.00547    0.01181    0.00188
AFIX  43
H12I  2    0.239106    1.824468    0.841982    11.00000   -1.20000
AFIX   0
N1G   6    0.371542    1.934922    1.223705    11.00000    0.08118    0.04874 =
         0.03372   -0.00167    0.01764    0.01492
C11H  1    0.219204    1.696880    0.973012    11.00000    0.03698    0.03999 =
         0.03381   -0.00388    0.00793    0.00603
AFIX  43
H11H  2    0.176463    1.706079    0.960567    11.00000   -1.20000
AFIX   0

C25A  1   -0.008492    1.478752    0.923659    11.00000    0.02980    0.03632 =
         0.03143   -0.00404    0.00720    0.00336
AFIX  43
H25A  2   -0.000681    1.525393    0.923155    11.00000   -1.20000
AFIX   0

C20D  1    0.847201    1.724131    0.519519    11.00000    0.04245    0.04116 =
         0.03576   -0.00222    0.01049    0.00175
AFIX  43
H20D  2    0.877645    1.692921    0.514495    11.00000   -1.20000
AFIX   0

C10B  1    0.052879    1.263881    0.661451    11.00000    0.04581    0.03339 =
         0.04004   -0.00153    0.01912    0.00568
C22I  1    0.284258    1.461337    0.822554    11.00000    0.02918    0.03677 =
         0.03481   -0.00686    0.00667    0.00229
AFIX  43
H22I  2    0.237423    1.453230    0.824157    11.00000   -1.20000
AFIX   0
C25H  1    0.539875    1.530072    0.781201    11.00000    0.03153    0.04071 =
         0.02904   -0.00508    0.00779    0.00517
AFIX  43
H25H  2    0.519851    1.517445    0.758779    11.00000   -1.20000
AFIX   0
C2I   1    0.358180    2.190972    1.042762    11.00000    0.03750    0.03840 =
         0.03522   -0.00505    0.00877    0.00388
AFIX  43
H2I   2    0.323368    2.174682    1.054475    11.00000   -1.20000
AFIX   0

C13D  1    0.807620    1.867679    0.604127    11.00000    0.03888    0.05758 =
         0.03431   -0.01499    0.01573   -0.00821
C25I  1    0.414685    1.363659    0.807727    11.00000    0.03359    0.03817 =
         0.03773   -0.00538    0.00707    0.00714
AFIX  43
H25I  2    0.459953    1.357751    0.804453    11.00000   -1.20000
AFIX   0

C6E   1    0.466486    1.945371    0.700570    11.00000    0.03447    0.03574 =
         0.03645   -0.00182    0.01202    0.00413
AFIX  43
H6E   2    0.480329    1.991283    0.702509    11.00000   -1.20000
AFIX   0

C7H   1    0.068009    1.866560    1.027413    11.00000    0.03139    0.03498 =
         0.04541   -0.00374    0.01377    0.00189
AFIX  43
H7H   2    0.032204    1.835391    1.030871    11.00000   -1.20000
AFIX   0

C20A  1   -0.196301    1.277804    0.819341    11.00000    0.04124    0.03587 =
         0.03823   -0.00451    0.01498   -0.00005
AFIX  43
H20A  2   -0.225691    1.306182    0.827908    11.00000   -1.20000
AFIX   0

C22G  1    0.375601    1.661534    0.777628    11.00000    0.04168    0.03617 =
         0.03279   -0.00317    0.01127    0.00428
AFIX  43
H22G  2    0.365707    1.704349    0.770378    11.00000   -1.20000
AFIX   0
C20G  1    0.496923    1.720802    0.845157    11.00000    0.03709    0.03573 =
         0.03215   -0.00227    0.01222    0.00250
AFIX  43
H20G  2    0.529100    1.690250    0.841584    11.00000   -1.20000
AFIX   0
C6G   1    0.291530    1.906084    1.096397    11.00000    0.03667    0.03595 =
         0.03338   -0.00484    0.01178    0.00366
AFIX  43
H6G   2    0.247741    1.907333    1.102583    11.00000   -1.20000
AFIX   0
C9I   1    0.260056    1.969484    0.940781    11.00000    0.03288    0.03636 =
         0.03144   -0.00504    0.01056    0.00391
AFIX  43
H9I   2    0.256975    1.984414    0.918634    11.00000   -1.20000
AFIX   0

C21D  1    0.867856    1.771087    0.545704    11.00000    0.04189    0.05052 =
         0.03210   -0.00435    0.00867   -0.00607
AFIX  43
H21D  2    0.912520    1.772369    0.558387    11.00000   -1.20000
AFIX   0
C16E  1    0.690815    1.554396    0.612914    11.00000    0.04149    0.04271 =
         0.03209    0.00093    0.01588    0.01124
C3D   1    0.681183    1.918311    0.827016    11.00000    0.03983    0.03543 =
         0.03076   -0.00513    0.01092    0.00180

C22A  1   -0.074763    1.321253    0.887085    11.00000    0.03723    0.03452 =
         0.03656   -0.00335    0.01436    0.00180
AFIX  43
H22A  2   -0.075010    1.277147    0.894271    11.00000   -1.20000
AFIX   0

C13G  1    0.454269    1.869292    0.924171    11.00000    0.03272    0.03779 =
         0.03102   -0.00469    0.01232    0.00245
C8B   1    0.170603    1.141032    0.647058    11.00000    0.04342    0.03537 =
         0.04228   -0.00323    0.01297    0.00326
C10C  1    0.075054    1.136516    0.723497    11.00000    0.04429    0.03899 =
         0.03452   -0.00858    0.01310    0.00140
C19I  1    0.270406    1.573514    0.830088    11.00000    0.02666    0.03337 =
         0.03253   -0.00496    0.00937    0.00216
C28I  1    0.373486    1.244777    0.802429    11.00000    0.04504    0.03440 =
         0.03689   -0.00633    0.00171    0.00938
C17B  1   -0.085068    1.377897    0.728661    11.00000    0.05330    0.03538 =
         0.03646   -0.00615    0.01628    0.00345
AFIX  43
H17B  2   -0.085806    1.336778    0.716768    11.00000   -1.20000
AFIX   0

C17G  1    0.403045    1.810836    0.854866    11.00000    0.03971    0.03707 =
         0.03821   -0.00490    0.01778    0.00219
AFIX  43
H17G  2    0.371533    1.842364    0.857998    11.00000   -1.20000
AFIX   0

C23D  1    0.710285    1.629268    0.422754    11.00000    0.04207    0.03992 =
         0.03166   -0.00507    0.00778    0.00473
C24D  1    0.677346    1.630266    0.390618    11.00000    0.04592    0.03917 =
         0.03450   -0.00453    0.00684    0.00382
AFIX  43
H24D  2    0.671397    1.667830    0.377332    11.00000   -1.20000
AFIX   0

C25C  1   -0.096489    1.626501    0.865990    11.00000    0.03334    0.03804 =
         0.04157   -0.00067    0.01091    0.00326
AFIX  43
H25C  2   -0.138590    1.629386    0.873764    11.00000   -1.20000
AFIX   0
C19C  1    0.046663    1.426992    0.828043    11.00000    0.02528    0.04309 =
         0.03732   -0.01289    0.00924    0.00035

C9E   1    0.494839    1.778315    0.686366    11.00000    0.03707    0.03716 =
         0.04470   -0.00448    0.01228    0.00443
AFIX  43
H9E   2    0.467452    1.737618    0.684119    11.00000   -1.20000
AFIX   0
C22F  1    0.627527    1.463109    0.491717    11.00000    0.03270    0.05038 =
         0.03845   -0.00648    0.01010    0.00093
AFIX  43
H22F  2    0.584266    1.450861    0.497552    11.00000   -1.20000
AFIX   0
C19E  1    0.755952    1.553761    0.557914    11.00000    0.03186    0.04150 =
         0.02813   -0.00212    0.00777    0.00686

C3I   1    0.372779    2.156404    1.015436    11.00000    0.03370    0.03140 =
         0.03596   -0.00464    0.00423    0.00239
C4I   1    0.424418    2.181246    0.998940    11.00000    0.03504    0.03959 =
         0.04093   -0.00631    0.01122    0.00224
AFIX  43
H4I   2    0.434950    2.158331    0.979926    11.00000   -1.20000
AFIX   0
C12G  1    0.410014    1.817987    0.930888    11.00000    0.03684    0.03463 =
         0.03229   -0.00786    0.01066   -0.00123
AFIX  43
H12G  2    0.401315    1.779393    0.916545    11.00000   -1.20000
AFIX   0

C13B  1   -0.003033    1.377590    0.678262    11.00000    0.04778    0.03496 =
         0.03532    0.00017    0.02023    0.00815
C21I  1    0.175746    1.635510    0.808959    11.00000    0.03153    0.03864 =
         0.02948   -0.00568    0.00300    0.00349
AFIX  43
H21I  2    0.138628    1.642881    0.791873    11.00000   -1.20000
AFIX   0
C12H  1    0.249988    1.640477    0.965072    11.00000    0.04550    0.03603 =
         0.03302   -0.00663    0.01009    0.00598
AFIX  43
H12H  2    0.228955    1.611340    0.946934    11.00000   -1.20000
AFIX   0

N8F   6    0.766974    1.126133    0.462564    11.00000    0.07101    0.04854 =
         0.07503   -0.00052    0.01308    0.01065
C10F  1    0.558768    1.853218    0.610278    11.00000    0.03785    0.03929 =
         0.04021   -0.00163    0.01061    0.00459
C14B  1   -0.037487    1.337007    0.651873    11.00000    0.04139    0.04596 =
         0.04126   -0.00105    0.01404    0.00883
AFIX  43
H14B  2   -0.079739    1.348234    0.639706    11.00000   -1.20000
AFIX   0

C16D  1    0.823425    1.815230    0.552994    11.00000    0.04833    0.05179 =
         0.03092   -0.01475    0.01678   -0.01171
C13C  1    0.126325    1.232929    0.772191    11.00000    0.03673    0.04415 =
         0.04453   -0.01542    0.01135    0.00085
C23F  1    0.670070    1.412999    0.482845    11.00000    0.03190    0.04783 =
         0.03808   -0.00458    0.00956    0.00044
C14H  1    0.343334    1.668929    1.010494    11.00000    0.03367    0.03840 =
         0.03537    0.00112    0.01293    0.00718
AFIX  43
H14H  2    0.385101    1.658511    1.023467    11.00000   -1.20000
AFIX   0
C7G   1    0.403562    1.906711    1.100496    11.00000    0.03425    0.04096 =
         0.03168   -0.00556    0.01047    0.00513
AFIX  43
H7G   2    0.451103    1.908277    1.108793    11.00000   -1.20000
AFIX   0

C14A  1   -0.150659    1.076687    0.723026    11.00000    0.04103    0.05473 =
         0.03567   -0.00702    0.01297   -0.00158
AFIX  43
H14A  2   -0.156891    1.042974    0.738239    11.00000   -1.20000
AFIX   0

C18G  1    0.383773    1.758008    0.832145    11.00000    0.03519    0.04150 =
         0.03289   -0.00338    0.00977    0.00335
AFIX  43
H18G  2    0.338910    1.753006    0.819592    11.00000   -1.20000
AFIX   0

C13E  1    0.635025    1.607288    0.652224    11.00000    0.04999    0.03807 =
         0.03798    0.00221    0.02354    0.01297
C20C  1    0.058261    1.372991    0.847595    11.00000    0.03705    0.03682 =
         0.04932   -0.00967    0.01792   -0.00086
AFIX  43
H20C  2    0.041074    1.370217    0.868039    11.00000   -1.20000
AFIX   0

C7E   1    0.403015    1.850914    0.699230    11.00000    0.03751    0.03242 =
         0.04543   -0.00452    0.01212    0.00365
AFIX  43
H7E   2    0.366182    1.818846    0.699935    11.00000   -1.20000
AFIX   0
C19D  1    0.782403    1.722960    0.500848    11.00000    0.04378    0.04201 =
         0.02934   -0.00517    0.00985   -0.00203

N1C   6   -0.090243    0.671193    0.655335    11.00000    0.08242    0.04844 =
         0.06042   -0.00754    0.01704   -0.01384
C24I  1    0.307307    1.340916    0.812373    11.00000    0.03352    0.03699 =
         0.04265   -0.00647    0.00728    0.00333
AFIX  43
H24I  2    0.264109    1.318523    0.813139    11.00000   -1.20000
AFIX   0

C6A   1    0.023645    1.085230    0.570896    11.00000    0.04093    0.03813 =
         0.03350   -0.00256    0.01266    0.00525
AFIX  43
H6A   2    0.070401    1.082087    0.569557    11.00000   -1.20000
AFIX   0
C3B   1    0.288425    1.024723    0.630827    11.00000    0.03985    0.04233 =
         0.03531   -0.00184    0.01029    0.01028
C28B  1   -0.338030    1.449327    0.896542    11.00000    0.03388    0.04025 =
         0.03741    0.00535    0.01343    0.00943

C28H  1    0.659802    1.540438    0.771877    11.00000    0.03482    0.04604 =
         0.03481    0.00278    0.01244    0.01326
C19F  1    0.607473    1.573801    0.501572    11.00000    0.02871    0.05323 =
         0.03960   -0.01438    0.00823    0.00241
C13H  1    0.311391    1.627525    0.983897    11.00000    0.04191    0.03420 =
         0.03360    0.00104    0.01978    0.00744
C4H   1   -0.044076    1.939365    1.044412    11.00000    0.03476    0.04628 =
         0.05014    0.00095    0.01375    0.00944
AFIX  43
H4H   2   -0.053018    1.893139    1.039771    11.00000   -1.20000
AFIX   0

C14E  1    0.672732    1.646524    0.678367    11.00000    0.04148    0.04792 =
         0.03813    0.00431    0.01677    0.01438
AFIX  43
H14E  2    0.715893    1.634618    0.689140    11.00000   -1.20000
AFIX   0
C8D   1    0.710531    1.903770    0.742877    11.00000    0.03429    0.05833 =
         0.03543   -0.00599    0.01118    0.00510
C8F   1    0.603887    2.020105    0.648243    11.00000    0.05060    0.04762 =
         0.03610   -0.00138    0.00898   -0.00443

C18I  1    0.285037    1.615397    0.858423    11.00000    0.03570    0.04365 =
         0.03696   -0.01081   -0.00102    0.00962
AFIX  43
H18I  2    0.323124    1.609033    0.875155    11.00000   -1.20000
AFIX   0

C12E  1    0.571957    1.622838    0.636647    11.00000    0.05270    0.03960 =
         0.03843   -0.00473    0.01230    0.00767
AFIX  43
H12E  2    0.546830    1.594904    0.618955    11.00000   -1.20000
AFIX   0

C11B  1    0.086700    1.305734    0.687804    11.00000    0.04348    0.03757 =
         0.04148   -0.00337    0.01197    0.00513
AFIX  43
H11B  2    0.128927    1.294935    0.700173    11.00000   -1.20000
AFIX   0

C20E  1    0.728423    1.494939    0.568353    11.00000    0.03248    0.03943 =
         0.03671   -0.00464    0.00986    0.00827
AFIX  43
H20E  2    0.731564    1.454560    0.556487    11.00000   -1.20000
AFIX   0

C37   1    0.396209    2.250596    1.052612    11.00000    0.04278    0.03996 =
         0.03837   -0.00956    0.00050    0.00632
AFIX  43
H37   2    0.385526    2.275203    1.071074    11.00000   -1.20000
AFIX   0

C22D  1    0.738095    1.683806    0.446396    11.00000    0.04747    0.03967 =
         0.03517   -0.00525    0.00737    0.00377
AFIX  43
H22D  2    0.739374    1.728096    0.439467    11.00000   -1.20000
AFIX   0

C18B  1   -0.113059    1.381321    0.757832    11.00000    0.04619    0.03411 =
         0.03586   -0.00174    0.01511    0.00263
AFIX  43
H18B  2   -0.133212    1.342564    0.765959    11.00000   -1.20000
AFIX   0

C4D   1    0.742994    1.930061    0.848520    11.00000    0.04221    0.04358 =
         0.03643   -0.00446    0.00964    0.00720
AFIX  43
H4D   2    0.784826    1.932990    0.840170    11.00000   -1.20000
AFIX   0
C25E  1    0.881444    1.549067    0.451029    11.00000    0.03232    0.04743 =
         0.02999   -0.00527    0.00975    0.00187
AFIX  43
H25E  2    0.864943    1.542710    0.427707    11.00000   -1.20000
AFIX   0
C10D  1    0.738976    1.881653    0.656998    11.00000    0.03514    0.05717 =
         0.03101   -0.00637    0.01119    0.00541

C28C  1   -0.065358    1.747438    0.866746    11.00000    0.04281    0.03628 =
         0.04365   -0.00159    0.00778    0.00492
C25F  1    0.758446    1.377718    0.466632    11.00000    0.03688    0.04203 =
         0.03653   -0.00309    0.00845    0.00222
AFIX  43
H25F  2    0.800915    1.375948    0.459095    11.00000   -1.20000
AFIX   0

C18C  1    0.072981    1.432350    0.798260    11.00000    0.03394    0.05671 =
         0.03403   -0.00614    0.00757    0.00835
AFIX  43
H18C  2    0.065781    1.469740    0.784958    11.00000   -1.20000
AFIX   0

C11E  1    0.545258    1.679541    0.646919    11.00000    0.04086    0.04009 =
         0.04339   -0.00250    0.00888    0.00999
AFIX  43
H11E  2    0.501645    1.690655    0.636339    11.00000   -1.20000
AFIX   0

C30G  1    0.192449    1.422171    0.651585    11.00000    0.04558    0.04072 =
         0.03527   -0.00703    0.01021   -0.00277
AFIX  43
H30G  2    0.175315    1.377102    0.648785    11.00000   -1.20000
AFIX   0

C27D  1    0.592869    1.587144    0.326509    11.00000    0.04459    0.04746 =
         0.03855   -0.00148    0.00272    0.00040
AFIX  43
H27D  2    0.610410    1.632097    0.329302    11.00000   -1.20000
AFIX   0
C5D   1    0.742024    1.937384    0.882416    11.00000    0.04565    0.04275 =
         0.03691   -0.00453    0.00548    0.00797
AFIX  43
H5D   2    0.784461    1.944978    0.897092    11.00000   -1.20000
AFIX   0

C7B   1    0.234715    1.127768    0.642817    11.00000    0.04239    0.03509 =
         0.05052   -0.00316    0.01422    0.00381
AFIX  43
H7B   2    0.273104    1.158753    0.643687    11.00000   -1.20000
AFIX   0

C4E   1    0.282440    1.920403    0.706731    11.00000    0.03708    0.03390 =
         0.05547   -0.00267    0.01575    0.00571
AFIX  43
H4E   2    0.275859    1.874132    0.701797    11.00000   -1.20000
AFIX   0

C3A   1   -0.019662    1.081679    0.509284    11.00000    0.05256    0.03240 =
         0.03384   -0.00477    0.00971    0.00700
C29G  1    0.231856    1.443275    0.682189    11.00000    0.04479    0.04091 =
         0.02979   -0.00387    0.00816    0.00122
AFIX  43
H29G  2    0.240721    1.413929    0.699933    11.00000   -1.20000
AFIX   0

C29D  1    0.585308    1.477675    0.345603    11.00000    0.05062    0.04553 =
         0.03078   -0.00423    0.00536    0.00469
AFIX  43
H29D  2    0.597216    1.446032    0.361923    11.00000   -1.20000
AFIX   0

C12B  1    0.058498    1.363167    0.695897    11.00000    0.05166    0.03741 =
         0.03690   -0.00410    0.01088    0.00528
AFIX  43
H12B  2    0.081678    1.392346    0.713557    11.00000   -1.20000
AFIX   0
C6C   1   -0.011242    0.915520    0.641291    11.00000    0.04094    0.03882 =
         0.03059   -0.00432    0.01005    0.00335
AFIX  43
H6C   2   -0.024148    0.904721    0.618035    11.00000   -1.20000
AFIX   0
C7C   1    0.009415    0.905004    0.696033    11.00000    0.06307    0.03845 =
         0.03052   -0.00435    0.00695    0.00512
AFIX  43
H7C   2    0.013867    0.887821    0.717761    11.00000   -1.20000
AFIX   0

C9D   1    0.743311    1.897202    0.713817    11.00000    0.03606    0.06522 =
         0.03714   -0.00452    0.01446    0.00864
AFIX  43
H9D   2    0.791541    1.898966    0.715812    11.00000   -1.20000
AFIX   0
C2D   1    0.621695    1.914296    0.840195    11.00000    0.04190    0.04771 =
         0.03672   -0.00973    0.01459   -0.00889
AFIX  43
H2D   2    0.578574    1.905935    0.826167    11.00000   -1.20000
AFIX   0
C18E  1    0.749121    1.612908    0.574273    11.00000    0.05088    0.03972 =
         0.03522   -0.00073    0.01662    0.00255
AFIX  43
H18E  2    0.767172    1.653223    0.566698    11.00000   -1.20000
AFIX   0

C26G  1    0.202791    1.524236    0.630393    11.00000    0.04222    0.04806 =
         0.03110    0.00009    0.00903    0.00369
AFIX  43
H26G  2    0.192371    1.552968    0.612503    11.00000   -1.20000
AFIX   0

C3C   1   -0.039313    0.802970    0.662172    11.00000    0.04918    0.03869 =
         0.03737   -0.00333    0.00774    0.00005
C29E  1    0.997039    1.531610    0.415397    11.00000    0.04223    0.06311 =
         0.03494    0.00354    0.01174    0.01184
AFIX  43
H29E  2    0.954414    1.511036    0.404599    11.00000   -1.20000
AFIX   0
C2E   1    0.353799    2.020887    0.717025    11.00000    0.03843    0.03682 =
         0.04727   -0.00447    0.01152    0.00436
AFIX  43
H2E   2    0.397145    2.044958    0.719571    11.00000   -1.20000
AFIX   0

C9B   1    0.143125    1.203068    0.653205    11.00000    0.04412    0.03463 =
         0.04976   -0.00569    0.01449    0.00291
AFIX  43
H9B   2    0.172014    1.242801    0.657235    11.00000   -1.20000
AFIX   0

C28E  1    1.004987    1.559337    0.447499    11.00000    0.03652    0.03985 =
         0.03905    0.00603    0.01529    0.00814
C24F  1    0.660604    1.345778    0.482214    11.00000    0.03687    0.04811 =
         0.04786   -0.00326    0.01276    0.00094
AFIX  43
H24F  2    0.622713    1.319917    0.487750    11.00000   -1.20000
AFIX   0
C7D   1    0.735274    1.910998    0.775949    11.00000    0.03302    0.06644 =
         0.03653   -0.00521    0.01114    0.00417
AFIX  43
H7D   2    0.781835    1.914901    0.786286    11.00000   -1.20000
AFIX   0

C27B  1   -0.402048    1.417238    0.885579    11.00000    0.03701    0.03858 =
         0.04985   -0.00020    0.01521    0.00623
AFIX  43
H27B  2   -0.412729    1.393965    0.864467    11.00000   -1.20000
AFIX   0

C17I  1    0.244396    1.666426    0.862430    11.00000    0.03666    0.04155 =
         0.03339   -0.01162    0.00086    0.00668
AFIX  43
H17I  2    0.253779    1.694327    0.882132    11.00000   -1.20000
AFIX   0

C10A  1   -0.109687    1.114855    0.673819    11.00000    0.03810    0.04969 =
         0.03846   -0.01008    0.01481    0.00021
C13A  1   -0.173794    1.139043    0.727612    11.00000    0.03780    0.05729 =
         0.04316   -0.02109    0.01830   -0.00980
C14C  1    0.170215    1.194947    0.758851    11.00000    0.03370    0.05239 =
         0.04148   -0.01288    0.00504    0.01243
AFIX  43
H14C  2    0.218013    1.202161    0.766256    11.00000   -1.20000
AFIX   0

C6F   1    0.635089    2.072108    0.695635    11.00000    0.04332    0.04933 =
         0.03517   -0.00621    0.01059   -0.00169
AFIX  43
H6F   2    0.647960    2.082241    0.718955    11.00000   -1.20000
AFIX   0

C27H  1    0.720416    1.579229    0.779861    11.00000    0.04241    0.04098 =
         0.05280    0.00099    0.02069    0.00985
AFIX  43
H27H  2    0.729475    1.608375    0.799109    11.00000   -1.20000
AFIX   0

C30D  1    0.542289    1.459749    0.315878    11.00000    0.04953    0.05090 =
         0.03562   -0.00771    0.00776   -0.00356
AFIX  43
H30D  2    0.525443    1.414708    0.312121    11.00000   -1.20000
AFIX   0

C2H   1    0.028401    2.038953    1.047396    11.00000    0.03724    0.04589 =
         0.05532   -0.01109    0.01440    0.00547
AFIX  43
H2H   2    0.070527    2.062035    1.045239    11.00000   -1.20000
AFIX   0

C13F  1    0.516695    1.762193    0.557686    11.00000    0.03745    0.05004 =
         0.05330   -0.01646    0.00919    0.00511
C17E  1    0.715731    1.613512    0.601915    11.00000    0.05905    0.03797 =
         0.03528   -0.00305    0.01828    0.01077
AFIX  43
H17E  2    0.710230    1.654109    0.613015    11.00000   -1.20000
AFIX   0

C29C  1   -0.112033    1.764364    0.886828    11.00000    0.04529    0.04025 =
         0.04615   -0.00300    0.00997    0.00550
AFIX  43
H29C  2   -0.134662    1.731752    0.898295    11.00000   -1.20000
AFIX   0
C16C  1    0.118972    1.327279    0.807542    11.00000    0.02740    0.04565 =
         0.05156   -0.02267    0.00765    0.00053
C15A  1   -0.118370    1.064797    0.695835    11.00000    0.04177    0.04587 =
         0.03992   -0.00732    0.01237    0.00383
AFIX  43
H15A  2   -0.102302    1.022714    0.692288    11.00000   -1.20000
AFIX   0
C15C  1    0.144584    1.146298    0.734664    11.00000    0.03820    0.05032 =
         0.04192   -0.01233    0.00619    0.01667
AFIX  43
H15C  2    0.174734    1.119449    0.725651    11.00000   -1.20000
AFIX   0
C8A   1   -0.070272    1.093531    0.589732    11.00000    0.04106    0.04686 =
         0.04198   -0.00670    0.01342    0.00418

C1D   1    0.626865    1.922869    0.874629    11.00000    0.05160    0.04544 =
         0.04135   -0.00904    0.02127   -0.01173
AFIX  43
H1D   2    0.585821    1.920270    0.883675    11.00000   -1.20000
AFIX   0

C9A   1   -0.107832    1.102015    0.616645    11.00000    0.03949    0.05647 =
         0.04188   -0.01141    0.01263    0.00497
AFIX  43
H9A   2   -0.155489    1.106726    0.612533    11.00000   -1.20000
AFIX   0
C29B  1   -0.325173    1.483331    0.927298    11.00000    0.03985    0.06641 =
         0.03806   -0.00226    0.01290    0.00919
AFIX  43
H29B  2   -0.282154    1.506593    0.935212    11.00000   -1.20000
AFIX   0

C15E  1    0.646007    1.703862    0.688537    11.00000    0.03956    0.04605 =
         0.03654   -0.00247    0.01448    0.00723
AFIX  43
H15E  2    0.671251    1.731714    0.706231    11.00000   -1.20000
AFIX   0

C15B  1   -0.009176    1.279449    0.643459    11.00000    0.04647    0.04121 =
         0.03983   -0.00809    0.01386    0.00395
AFIX  43
H15B  2   -0.032172    1.250906    0.625487    11.00000   -1.20000
AFIX   0

C9F   1    0.584177    1.963627    0.625500    11.00000    0.05311    0.04592 =
         0.03648   -0.00085    0.00728   -0.00292
AFIX  43
H9F   2    0.574638    1.970100    0.602130    11.00000   -1.20000
AFIX   0

C2A   1    0.045025    1.083826    0.500938    11.00000    0.05356    0.04079 =
         0.03783   -0.00395    0.01508    0.00183
AFIX  43
H2A   2    0.084579    1.088493    0.517746    11.00000   -1.20000
AFIX   0
C17C  1    0.110078    1.381634    0.788446    11.00000    0.03508    0.06818 =
         0.03708   -0.01387    0.00972    0.00982
AFIX  43
H17C  2    0.129156    1.384795    0.768535    11.00000   -1.20000
AFIX   0
C21C  1    0.095079    1.322599    0.837423    11.00000    0.03840    0.03769 =
         0.05776   -0.00822    0.01874    0.00134
AFIX  43
H21C  2    0.103547    1.285629    0.850888    11.00000   -1.20000
AFIX   0
C30A  1    0.129196    1.550719    1.013802    11.00000    0.04714    0.04826 =
         0.03791   -0.00798    0.00431    0.00063
AFIX  43
H30A  2    0.144614    1.596154    1.017350    11.00000   -1.20000
AFIX   0

C1E   1    0.295900    2.052022    0.720705    11.00000    0.04731    0.03620 =
         0.04724   -0.00324    0.01327    0.01096
AFIX  43
H1E   2    0.300894    2.098332    0.725587    11.00000   -1.20000
AFIX   0

C2G   1    0.301581    1.913980    1.169518    11.00000    0.05515    0.04343 =
         0.03801   -0.00493    0.01943   -0.00260
AFIX  43
H2G   2    0.257281    1.905780    1.156597    11.00000   -1.20000
AFIX   0

C14F  1    0.471529    1.779516    0.577989    11.00000    0.03235    0.05012 =
         0.05289   -0.00499    0.00977    0.00272
AFIX  43
H14F  2    0.425873    1.760339    0.573902    11.00000   -1.20000
AFIX   0

C1B   1    0.336210    0.924904    0.618106    11.00000    0.05092    0.04633 =
         0.05735   -0.00556    0.01341    0.01479
AFIX  43
H1B   2    0.330078    0.878659    0.613061    11.00000   -1.20000
AFIX   0

C28F  1    0.732780    1.256235    0.468312    11.00000    0.04289    0.04169 =
         0.04658   -0.00432    0.00516    0.00354
C7A   1   -0.087632    1.090345    0.555881    11.00000    0.04159    0.05685 =
         0.03960   -0.00980    0.00860    0.00930
AFIX  43
H7A   2   -0.132031    1.091235    0.543140    11.00000   -1.20000
AFIX   0
C4A   1   -0.075865    1.074924    0.484115    11.00000    0.05528    0.04513 =
         0.04231   -0.00529    0.00681    0.01448
AFIX  43
H4A   2   -0.120874    1.072292    0.489050    11.00000   -1.20000
AFIX   0
C27A  1    0.084979    1.421180    1.003337    11.00000    0.05441    0.05081 =
         0.04420    0.00983   -0.00404   -0.01372
AFIX  43
H27A  2    0.070806    1.375391    1.000421    11.00000   -1.20000
AFIX   0
C26B  1   -0.450044    1.420539    0.906804    11.00000    0.03525    0.04811 =
         0.06785    0.01443    0.01970    0.01030
AFIX  43
H26B  2   -0.493982    1.398688    0.899425    11.00000   -1.20000
AFIX   0
C29A  1    0.084978    1.531610    0.984320    11.00000    0.04859    0.04269 =
         0.03537   -0.00574    0.00087    0.00712
AFIX  43
H29A  2    0.070663    1.562853    0.968159    11.00000   -1.20000
AFIX   0

C4G   1    0.423093    1.928983    1.174116    11.00000    0.05254    0.05454 =
         0.03510   -0.00349    0.00868    0.01470
AFIX  43
H4G   2    0.463332    1.931159    1.164403    11.00000   -1.20000
AFIX   0

C14D  1    0.792780    1.929306    0.613760    11.00000    0.06357    0.05519 =
         0.04830   -0.01249    0.02982   -0.01257
AFIX  43
H14D  2    0.806143    1.966849    0.602252    11.00000   -1.20000
AFIX   0
C18D  1    0.738683    1.769402    0.508012    11.00000    0.04036    0.05502 =
         0.04429   -0.01717    0.00721    0.00283
AFIX  43
H18D  2    0.694571    1.769474    0.494876    11.00000   -1.20000
AFIX   0
C26D  1    0.548651    1.564232    0.297635    11.00000    0.04797    0.05887 =
         0.03484    0.00252    0.00244    0.00222
AFIX  43
H26D  2    0.536047    1.594852    0.280881    11.00000   -1.20000
AFIX   0

C5I   1    0.459882    2.240348    1.011125    11.00000    0.03668    0.04375 =
         0.05318   -0.00446    0.01177   -0.00191
AFIX  43
H5I   2    0.495542    2.257218    1.000094    11.00000   -1.20000
AFIX   0
C27I  1    0.334264    1.197407    0.816230    11.00000    0.04886    0.03828 =
         0.04498   -0.00638    0.00714    0.00689
AFIX  43
H27I  2    0.301048    1.209695    0.829040    11.00000   -1.20000
AFIX   0

C11C  1    0.031083    1.178013    0.735110    11.00000    0.03358    0.05365 =
         0.05164   -0.01439    0.00795    0.00572
AFIX  43
H11C  2   -0.016242    1.173474    0.726179    11.00000   -1.20000
AFIX   0
C9C   1    0.047737    1.025397    0.710477    11.00000    0.04861    0.04070 =
         0.03449   -0.00492    0.00772    0.00608
AFIX  43
H9C   2    0.061368    1.019744    0.733739    11.00000   -1.20000
AFIX   0
C2B   1    0.279433    0.957564    0.622979    11.00000    0.04573    0.03933 =
         0.05527   -0.00201    0.01594    0.00661
AFIX  43
H2B   2    0.235730    0.934358    0.620968    11.00000   -1.20000
AFIX   0
C18A  1   -0.085565    1.239730    0.820689    11.00000    0.03823    0.04600 =
         0.05155   -0.01329    0.01134    0.00014
AFIX  43
H18A  2   -0.038743    1.240805    0.830416    11.00000   -1.20000
AFIX   0

C30E  1    1.053407    1.534940    0.399600    11.00000    0.05345    0.07939 =
         0.03936    0.01192    0.02026    0.02461
AFIX  43
H30E  2    1.047765    1.516819    0.377355    11.00000   -1.20000
AFIX   0
C27E  1    1.068308    1.587445    0.462517    11.00000    0.03882    0.04416 =
         0.05347   -0.00056    0.01579    0.00623
AFIX  43
H27E  2    1.075228    1.606204    0.484675    11.00000   -1.20000
AFIX   0

C2C   1   -0.029834    0.764557    0.635088    11.00000    0.04915    0.04619 =
         0.03928   -0.00835    0.01166    0.00041
AFIX  43
H2C   2   -0.005767    0.782122    0.618564    11.00000   -1.20000
AFIX   0

C26H  1    0.767708    1.573791    0.758485    11.00000    0.04029    0.05021 =
         0.06608    0.01390    0.02111    0.01144
AFIX  43
H26H  2    0.809357    1.600756    0.763646    11.00000   -1.20000
AFIX   0

C18F  1    0.578449    1.567929    0.530216    11.00000    0.04138    0.07363 =
         0.03855   -0.00361    0.00865    0.01665
AFIX  43
H18F  2    0.584353    1.530113    0.543319    11.00000   -1.20000
AFIX   0

C4C   1   -0.074487    0.775950    0.685909    11.00000    0.06695    0.04656 =
         0.04206   -0.00437    0.01627   -0.00353
AFIX  43
H4C   2   -0.082427    0.801804    0.704574    11.00000   -1.20000
AFIX   0
C4B   1    0.352084    1.056655    0.632741    11.00000    0.04414    0.04498 =
         0.05896   -0.00415    0.01116    0.00774
AFIX  43
H4B   2    0.359639    1.102837    0.637824    11.00000   -1.20000
AFIX   0

C29I  1    0.422198    1.225324    0.784197    11.00000    0.05068    0.04524 =
         0.03900   -0.00478    0.00777    0.01526
AFIX  43
H29I  2    0.449715    1.256827    0.774442    11.00000   -1.20000
AFIX   0

C17F  1    0.540402    1.618225    0.539622    11.00000    0.03871    0.08849 =
         0.04030   -0.01164    0.01117    0.01298
AFIX  43
H17F  2    0.520280    1.614684    0.559211    11.00000   -1.20000
AFIX   0

C5A   1   -0.064125    1.072120    0.451305    11.00000    0.07427    0.04875 =
         0.03737   -0.00519    0.00045    0.01642
AFIX  43
H5A   2   -0.102753    1.068761    0.433957    11.00000   -1.20000
AFIX   0

C15F  1    0.492842    1.824946    0.604365    11.00000    0.03627    0.05373 =
         0.04780   -0.00703    0.01339    0.00664
AFIX  43
H15F  2    0.461772    1.836733    0.618508    11.00000   -1.20000
AFIX   0
C5E   1    0.228273    1.956421    0.711320    11.00000    0.03812    0.04307 =
         0.06061    0.00006    0.01595    0.00677
AFIX  43
H5E   2    0.184590    1.933339    0.709703    11.00000   -1.20000
AFIX   0

C11A  1   -0.135321    1.176276    0.677934    11.00000    0.04891    0.05101 =
         0.04755   -0.00405    0.01884    0.00413
AFIX  43
H11A  2   -0.131000    1.209363    0.662172    11.00000   -1.20000
AFIX   0
C1A   1    0.050244    1.078955    0.467314    11.00000    0.06684    0.03835 =
         0.03720   -0.00473    0.01797    0.00012
AFIX  43
H1A   2    0.094637    1.079326    0.461697    11.00000   -1.20000
AFIX   0
C17A  1   -0.111702    1.195783    0.793636    11.00000    0.04511    0.04698 =
         0.05574   -0.01911    0.01953   -0.00101
AFIX  43
H17A  2   -0.082551    1.167665    0.784702    11.00000   -1.20000
AFIX   0

C1H   1   -0.023833    2.072037    1.057221    11.00000    0.04603    0.05019 =
         0.05375   -0.01407    0.00984    0.01371
AFIX  43
H1H   2   -0.016802    2.118596    1.061043    11.00000   -1.20000
AFIX   0
C26I  1    0.344908    1.131110    0.810789    11.00000    0.07179    0.03828 =
         0.04595   -0.00190    0.00642    0.00539
AFIX  43
H26I  2    0.317445    1.098426    0.819825    11.00000   -1.20000
AFIX   0

C20F  1    0.597837    1.628642    0.482582    11.00000    0.05047    0.04931 =
         0.06156   -0.00508    0.02447    0.00597
AFIX  43
H20F  2    0.617477    1.632542    0.462863    11.00000   -1.20000
AFIX   0

C30H  1    0.700416    1.495883    0.724727    11.00000    0.04337    0.08984 =
         0.03502   -0.00303    0.01142    0.02169
AFIX  43
H30H  2    0.693248    1.466538    0.705570    11.00000   -1.20000
AFIX   0
C29H  1    0.649583    1.496796    0.743985    11.00000    0.04009    0.07240 =
         0.03366   -0.00722    0.00691    0.01250
AFIX  43
H29H  2    0.608868    1.468556    0.738411    11.00000   -1.20000
AFIX   0

C30B  1   -0.376754    1.482357    0.946061    11.00000    0.05171    0.08385 =
         0.03928    0.00103    0.01791    0.01913
AFIX  43
H30B  2   -0.367348    1.505031    0.967348    11.00000   -1.20000
AFIX   0

C5H   1   -0.092457    1.977069    1.055044    11.00000    0.03599    0.05520 =
         0.05870    0.00001    0.01949    0.01087
AFIX  43
H5H   2   -0.134674    1.954920    1.057794    11.00000   -1.20000
AFIX   0

C17D  1    0.759123    1.815941    0.534368    11.00000    0.04560    0.05554 =
         0.05201   -0.02003    0.01777   -0.00115
AFIX  43
H17D  2    0.729199    1.847649    0.539413    11.00000   -1.20000
AFIX   0

C12A  1   -0.167306    1.188679    0.705353    11.00000    0.04554    0.04850 =
         0.05406   -0.00934    0.01974   -0.00034
AFIX  43
H12A  2   -0.184317    1.230403    0.708688    11.00000   -1.20000
AFIX   0
C12C  1    0.056825    1.226340    0.759939    11.00000    0.03607    0.05374 =
         0.05468   -0.01769    0.01316    0.00685
AFIX  43
H12C  2    0.027145    1.254523    0.768414    11.00000   -1.20000
AFIX   0

C16F  1    0.532063    1.672869    0.520535    11.00000    0.03329    0.05455 =
         0.05867   -0.01943    0.00606    0.00587
C15D  1    0.757907    1.936728    0.640583    11.00000    0.05605    0.05076 =
         0.04907   -0.01350    0.02465   -0.00490
AFIX  43
H15D  2    0.747312    1.979296    0.647467    11.00000   -1.20000
AFIX   0

C30C  1   -0.124462    1.830184    0.889577    11.00000    0.05661    0.04800 =
         0.05396   -0.00543    0.01247    0.01502
AFIX  43
H30C  2   -0.157282    1.841437    0.902846    11.00000   -1.20000
AFIX   0

C7F   1    0.611528    2.085214    0.641325    11.00000    0.07177    0.04675 =
         0.03677   -0.00488    0.01136   -0.00641
AFIX  43
H7F   2    0.604326    2.103620    0.619872    11.00000   -1.20000
AFIX   0
C29F  1    0.775264    1.238990    0.446495    11.00000    0.06998    0.05018 =
         0.05373    0.00295    0.02300    0.01606
AFIX  43
H29F  2    0.793762    1.270784    0.433056    11.00000   -1.20000
AFIX   0

C1G   1    0.310759    1.923196    1.203991    11.00000    0.06980    0.04277 =
         0.04101   -0.00374    0.02726    0.00019
AFIX  43
H1G   2    0.271310    1.921053    1.214324    11.00000   -1.20000
AFIX   0
C30I  1    0.429149    1.158601    0.780776    11.00000    0.07344    0.04958 =
         0.04213   -0.00669    0.00792    0.02479
AFIX  43
H30I  2    0.462855    1.145318    0.768510    11.00000   -1.20000
AFIX   0

C5C   1   -0.097588    0.709929    0.681394    11.00000    0.07806    0.05552 =
         0.05260   -0.00166    0.01644   -0.01344
AFIX  43
H5C   2   -0.120298    0.690811    0.698035    11.00000   -1.20000
AFIX   0

C5G   1    0.426333    1.937587    1.208474    11.00000    0.06615    0.05602 =
         0.03630   -0.00578    0.00548    0.02134
AFIX  43
H5G   2    0.470021    1.945860    1.221994    11.00000   -1.20000
AFIX   0

C1C   1   -0.056577    0.699419    0.632739    11.00000    0.06576    0.04865 =
         0.05176   -0.01402    0.01048   -0.00285
AFIX  43
H1C   2   -0.050694    0.672966    0.613878    11.00000   -1.20000
AFIX   0

C12D  1    0.787850    1.813191    0.619843    11.00000    0.08356    0.05257 =
         0.06181   -0.00704    0.04529    0.00814
AFIX  43
H12D  2    0.797711    1.770605    0.612601    11.00000   -1.20000
AFIX   0

C26A  1    0.128973    1.446305    1.031804    11.00000    0.05977    0.06641 =
         0.04212    0.01633   -0.00580   -0.01536
AFIX  43
H26A  2    0.144166    1.416295    1.048455    11.00000   -1.20000
AFIX   0

C26E  1    1.121252    1.587566    0.444495    11.00000    0.03929    0.05254 =
         0.06785    0.00919    0.01939    0.00913
AFIX  43
H26E  2    1.164637    1.607165    0.454853    11.00000   -1.20000
AFIX   0
C11D  1    0.753099    1.820186    0.646589    11.00000    0.08757    0.05189 =
         0.06456    0.00553    0.04933    0.01124
AFIX  43
H11D  2    0.739125    1.782278    0.657666    11.00000   -1.20000
AFIX   0

C27C  1   -0.032059    1.797000    0.851313    11.00000    0.06780    0.04063 =
         0.05823    0.00385    0.02585    0.00484
AFIX  43
H27C  2    0.000482    1.787062    0.837633    11.00000   -1.20000
AFIX   0
C5B   1    0.405170    1.019655    0.627049    11.00000    0.04349    0.05437 =
         0.06669   -0.00421    0.01276    0.00891
AFIX  43
H5B   2    0.449016    1.042153    0.628184    11.00000   -1.20000
AFIX   0
C26C  1   -0.047657    1.861379    0.856441    11.00000    0.08883    0.03959 =
         0.06577    0.00580    0.02678    0.00688
AFIX  43
H26C  2   -0.024175    1.895320    0.846163    11.00000   -1.20000
AFIX   0

C21F  1    0.559432    1.678478    0.492117    11.00000    0.05122    0.04856 =
         0.07332   -0.00544    0.02576    0.00573
AFIX  43
H21F  2    0.552506    1.715959    0.478855    11.00000   -1.20000
AFIX   0
C27F  1    0.707304    1.208162    0.487412    11.00000    0.05615    0.05102 =
         0.07842    0.00155    0.02437    0.00347
AFIX  43
H27F  2    0.678165    1.218636    0.502780    11.00000   -1.20000
AFIX   0
C26F  1    0.725493    1.144573    0.483466    11.00000    0.06872    0.04529 =
         0.09718    0.00780    0.02365    0.00187
AFIX  43
H26F  2    0.707456    1.111562    0.496412    11.00000   -1.20000
AFIX   0
C30F  1    0.789964    1.173397    0.444925    11.00000    0.08875    0.05782 =
         0.06238    0.00110    0.02762    0.02363
AFIX  43
H30F  2    0.819143    1.161620    0.429807    11.00000   -1.20000
AFIX   0
C11F  1    0.603921    1.835002    0.590350    11.00000    0.03749    0.09101 =
         0.07541   -0.03893    0.01581   -0.00686
AFIX  43
H11F  2    0.649657    1.853963    0.594559    11.00000   -1.20000
AFIX   0
C12F  1    0.583027    1.788900    0.564015    11.00000    0.03931    0.10430 =
         0.08392   -0.05033    0.02214   -0.00416
AFIX  43
H12F  2    0.614567    1.775857    0.550399    11.00000   -1.20000
AFIX   0
C3F   1    0.644212    2.189027    0.676644    11.00000    0.05418
C1F   1    0.658999    2.288015    0.709730    11.00000    0.06878
AFIX  43
H1F   2    0.661968    2.308513    0.731341    11.00000   -1.20000
AFIX   0
N1F   6    0.665447    2.326261    0.684913    11.00000    0.09257
C2F   1    0.648170    2.219895    0.706867    11.00000    0.06237
AFIX  43
H2F   2    0.643571    2.195129    0.725991    11.00000   -1.20000
AFIX   0

B9    3    0.401908    2.069970    0.897098    11.00000    0.03181    0.05944 =
         0.04126    0.00336    0.00870    0.00425
F33   5    0.440713    2.077494    0.871633    11.00000    0.03872    0.07720 =
         0.04675    0.00392    0.01615    0.00690
F34   5    0.445430    2.074723    0.927977    11.00000    0.04259    0.05402 =
         0.04355   -0.00062    0.00385    0.00082
F35   5    0.357907    2.120033    0.896223    11.00000    0.05622    0.09498 =
         0.05806    0.00975    0.01938    0.03417
F36   5    0.364971    2.009255    0.892871    11.00000    0.05321    0.07762 =
         0.06034   -0.00015    0.00219   -0.01934
N1S4  6    0.822448    1.876662    0.973929    11.00000    0.04913    0.05014 =
         0.08065   -0.00814    0.01455   -0.00119
C1S4  1    0.820653    1.821636    0.979853    11.00000    0.05393    0.05790 =
         0.06129   -0.01204    0.00043    0.00967
C2S4  1    0.815506    1.751370    0.987194    11.00000    0.08568    0.05346 =
         0.08577   -0.00308   -0.00011    0.01084
AFIX 137
H2SA  2    0.770289    1.731299    0.977113    11.00000   -1.50000
H2SB  2    0.822232    1.746749    1.011486    11.00000   -1.50000
H2SC  2    0.850556    1.729090    0.977890    11.00000   -1.50000
AFIX   0

C4F   1    0.658697    2.225440    0.650263    11.00000    0.08989
AFIX  43
H4F   2    0.661661    2.204647    0.629319    11.00000   -1.20000
AFIX   0

C1S9  1    0.479937    2.169337    0.696348    11.00000    0.04535    0.05046 =
         0.05938   -0.00757    0.01253   -0.00302
N1S9  6    0.489946    2.115716    0.700985    11.00000    0.04926    0.05010 =
         0.07680   -0.00328    0.01840   -0.00099
C2S9  1    0.466549    2.238386    0.690894    11.00000    0.07299    0.05195 =
         0.09307   -0.00129    0.01175    0.00834
AFIX 137
H2SD  2    0.497757    2.267047    0.707417    11.00000   -1.50000
H2SE  2    0.419363    2.244767    0.693305    11.00000   -1.50000
H2SF  2    0.473561    2.249593    0.668307    11.00000   -1.50000
AFIX   0

B8    3    0.059746    1.646663    0.575417    11.00000    0.04140    0.06513 =
         0.04676   -0.01539    0.00851   -0.00635
F31   5    0.078381    1.619572    0.606152    11.00000    0.07221    0.07205 =
         0.05249   -0.00845    0.00102    0.00303
F29   5    0.089960    1.613921    0.551266    11.00000    0.04052    0.11005 =
         0.06226   -0.03382    0.01464    0.00051
F32   5    0.079890    1.713389    0.577258    11.00000    0.08656    0.07161 =
         0.05787   -0.00767    0.00494   -0.01716
F30   5   -0.010542    1.637851    0.565550    11.00000    0.04204    0.09337 =
         0.05192   -0.02907    0.00933    0.00021
B3    3    0.080112    1.225803    0.922908    11.00000    0.04784    0.04617 =
         0.05657    0.00371    0.01476    0.00235
F9    5    0.043275    1.231703    0.948817    11.00000    0.07476    0.04981 =
         0.09108    0.01358    0.04997    0.00930
F12   5    0.130666    1.183430    0.931313    11.00000    0.05867    0.06179 =
         0.08928    0.01512    0.02837    0.01614
F11   5    0.109855    1.287463    0.917985    11.00000    0.08151    0.05298 =
         0.11126    0.01792    0.05128    0.00436
F10   5    0.037685    1.202678    0.894310    11.00000    0.09057    0.11817 =
         0.09811   -0.04136   -0.01896    0.02589
F8    5    0.359911    1.326420    0.728691    11.00000    0.06183    0.06260 =
         0.05140    0.00551   -0.00038   -0.01315
F7    5    0.304466    1.223503    0.721549    11.00000    0.05794    0.04668 =
         0.07034    0.00749    0.00975    0.00316
F5    5    0.288796    1.296046    0.679845    11.00000    0.06142    0.06342 =
         0.04678    0.00225    0.00107   -0.00630
F6    5    0.246674    1.314198    0.728258    11.00000    0.06929    0.07089 =
         0.07279    0.01773    0.02209    0.02310
B2    3    0.300031    1.289517    0.714782    11.00000    0.04764    0.04553 =
         0.04967    0.00487    0.00378    0.00160
F44   5    0.182048    1.808192    0.726199    11.00000    0.04763    0.05047 =
         0.05815    0.00832    0.01482    0.00904
F41   5    0.282558    1.761389    0.726936    11.00000    0.05108    0.05404 =
         0.06663    0.01240    0.02516    0.01126
F42   5    0.241167    1.778144    0.775565    11.00000    0.06587    0.08236 =
         0.04472   -0.00608    0.00597    0.01150
F43   5    0.189194    1.699782    0.736429    11.00000    0.06435    0.04489 =
         0.06890    0.00323    0.01999    0.00080
B11   3    0.223850    1.762223    0.741655    11.00000    0.04472    0.04560 =
         0.04301    0.00353    0.01172    0.00672
PART 1
F14A  5    0.655995    1.347039    0.784517    41.00000    0.04175    0.10465 =
         0.09190   -0.05843    0.00607    0.00008
F13A  5    0.574168    1.323433    0.817391    41.00000    0.03847    0.14780 =
         0.07288   -0.05556    0.00742    0.00742
F16A  5    0.588161    1.251033    0.776413    41.00000    0.07678    0.06619 =
         0.10408   -0.02606    0.03793    0.00545
F15A  5    0.543584    1.346283    0.763711    41.00000    0.04883    0.10493 =
         0.10080    0.00722    0.00325    0.01759
B4A   3    0.590821    1.316372    0.785564    41.00000    0.04096    0.07194 =
         0.06539   -0.02614   -0.00047    0.00346

B4    3    0.013775    1.695362    0.952155    51.00000    0.03410    0.04666 =
         0.03807    0.00646    0.00520   -0.00165
F28   5    0.037746    1.685257    0.985728    51.00000    0.05145    0.05614 =
         0.04124    0.00565    0.00469   -0.01201
F19   5    0.031852    1.759394    0.944657    51.00000    0.05252    0.04309 =
         0.06838    0.01459    0.02158   -0.00220
F25   5    0.041106    1.651701    0.932502    51.00000    0.10611    0.05928 =
         0.04494    0.00534    0.01991    0.02972
F26   5   -0.056366    1.683730    0.946159    51.00000    0.03824    0.09130 =
         0.07958    0.04638   -0.00134   -0.01519
PART 0
F21   5    0.357083    1.673434    0.656609    11.00000    0.05800    0.06537 =
         0.05253   -0.00185    0.00876   -0.01335
F22   5    0.378448    1.648316    0.604524    11.00000    0.07437    0.06520 =
         0.06257    0.00688    0.01950    0.02031
F23   5    0.348044    1.750728    0.616923    11.00000    0.05926    0.04774 =
         0.08947    0.00826    0.02634   -0.00108
F24   5    0.270862    1.661311    0.611718    11.00000    0.04983    0.06424 =
         0.06967    0.01828    0.00240   -0.00757
B6    3    0.339147    1.684106    0.622576    11.00000    0.04276    0.04583 =
         0.05762    0.00664    0.01002    0.00053

PART 1
B7A   3    0.407269    1.216698    0.592660    31.00000    0.05520    0.05343 =
         0.06891   -0.00839    0.02038    0.00697
F25A  5    0.357337    1.215167    0.612340    31.00000    0.08820    0.07945 =
         0.12562    0.02812    0.06108    0.02966
F28A  5    0.455493    1.174080    0.604740    31.00000    0.10284    0.11156 =
         0.09882    0.04215    0.05392    0.05678
F27A  5    0.436641    1.279928    0.592224    31.00000    0.07524    0.06077 =
         0.10671    0.01002    0.04215    0.00694
F26A  5    0.381965    1.192847    0.560688    31.00000    0.10507    0.12818 =
         0.08439   -0.03256   -0.00580    0.01416

PART 0
F2    5   -0.103614    1.926825    0.738927    11.00000    0.05765    0.10452 =
         0.07421    0.00026   -0.00853   -0.00317
F1    5   -0.109877    1.945785    0.793691    11.00000    0.04149    0.11087 =
         0.09267   -0.01749    0.01841    0.01127
F3    5   -0.025064    1.889146    0.779169    11.00000    0.08815    0.14121 =
         0.09582    0.02771    0.03197    0.06809
F4    5   -0.025479    1.996551    0.770992    11.00000    0.07099    0.12528 =
         0.10224    0.00365    0.00128   -0.02937
B1    3   -0.066418    1.937752    0.770998    11.00000    0.04248    0.08290 =
         0.06004    0.00418    0.00571    0.01474

PART 1
F45A  5    0.744345    1.651433    0.863129    61.00000    0.03408    0.09175 =
         0.05584   -0.02498    0.01411   -0.00350
F46A  5    0.660268    1.638283    0.893614    61.00000    0.05067    0.10382 =
         0.06918   -0.04543    0.02682   -0.03358
F48A  5    0.728377    1.733710    0.899353    61.00000    0.10103    0.06581 =
         0.13872   -0.02653    0.07115   -0.01008
B12A  3    0.723674    1.667083    0.893374    61.00000    0.04550    0.06101 =
         0.04314   -0.01604    0.00924   -0.00276
F47A  5    0.769939    1.641057    0.916433    61.00000    0.08298    0.15748 =
         0.08336    0.01302   -0.01826    0.00791

PART 0
N1S1  6    0.134484    1.866288    0.634155    11.00000    0.05558    0.04865 =
         0.07155   -0.00085    0.01499    0.00298
C1S1  1    0.151576    1.815244    0.640965    11.00000    0.04645    0.04700 =
         0.05106   -0.00812    0.01020   -0.00263
C2S1  1    0.174390    1.750511    0.649375    11.00000    0.11052    0.04946 =
         0.05806   -0.00919   -0.01480    0.01580
AFIX 137
H2SG  2    0.143034    1.716229    0.636321    11.00000   -1.50000
H2SH  2    0.175186    1.744263    0.673306    11.00000   -1.50000
H2SI  2    0.220323    1.747417    0.644166    11.00000   -1.50000
AFIX   0

N1    6    0.130087    1.517888    0.731442    11.00000    0.05302    0.05607 =
         0.04387   -0.01092    0.00740   -0.00098
C1    1    0.106743    1.552782    0.712256    11.00000    0.04248    0.05848 =
         0.04117   -0.01263    0.01539   -0.00600
C2    1    0.076957    1.597614    0.687899    11.00000    0.06273    0.08280 =
         0.05521    0.01467    0.01443    0.00289
AFIX 137
H2J   2    0.091038    1.588185    0.666330    11.00000   -1.50000
H2K   2    0.092533    1.643247    0.695549    11.00000   -1.50000
H2L   2    0.027132    1.591766    0.685326    11.00000   -1.50000
AFIX   0

N1S8  6    0.465489    1.916533    0.784824    11.00000    0.04409    0.10179 =
         0.05608    0.00141    0.01412    0.00242
C1S8  1    0.416275    1.929541    0.792875    11.00000    0.04714    0.06217 =
         0.04597    0.00408    0.01148   -0.00300
C2S8  1    0.352177    1.946435    0.802705    11.00000    0.05899    0.05677 =
         0.06248    0.01036    0.02762    0.01326
AFIX 137
H2SJ  2    0.335629    1.984357    0.790294    11.00000   -1.50000
H2SK  2    0.359731    1.957700    0.826772    11.00000   -1.50000
H2SL  2    0.318212    1.908571    0.797639    11.00000   -1.50000
AFIX   0

N1S5  6   -0.139412    2.080837    0.884165    11.00000    0.04743    0.10493 =
         0.08904   -0.00867    0.02575    0.00430
C2S5  1   -0.029161    2.051660    0.863055    11.00000    0.05128    0.07306 =
         0.07180   -0.01742    0.02075    0.00371
AFIX 137
H2SM  2   -0.039393    2.038395    0.839207    11.00000   -1.50000
H2SN  2   -0.010265    2.015103    0.875827    11.00000   -1.50000
H2SO  2    0.004128    2.090235    0.866453    11.00000   -1.50000
AFIX   0
C1S5  1   -0.091683    2.068422    0.874499    11.00000    0.04321    0.07324 =
         0.05925   -0.00931    0.01280   -0.00146

N1T6  6    0.185530    2.078052    0.559313    11.00000    0.05157    0.15159 =
         0.05569    0.01135    0.01174    0.01281
C1T6  1    0.234667    2.068148    0.550992    11.00000    0.05269    0.12070 =
         0.05861    0.02349    0.01060    0.00557
C2T6  1    0.298663    2.052226    0.540374    11.00000    0.06476    0.14556 =
         0.11053    0.04625    0.03767    0.02671
AFIX 137
H2TA  2    0.315100    2.013116    0.551740    11.00000   -1.50000
H2TB  2    0.332897    2.089691    0.546193    11.00000   -1.50000
H2TC  2    0.290711    2.043242    0.516103    11.00000   -1.50000
AFIX   0

C1T1  1    0.491811    1.758921    1.090538    11.00000    0.04697    0.05646 =
         0.05917    0.00070    0.00681    0.00361
N1T1  6    0.469425    1.757045    1.061517    11.00000    0.06568    0.08306 =
         0.06301   -0.00784   -0.00278    0.00799
C2T1  1    0.515524    1.760764    1.125630    11.00000    0.08713    0.07819 =
         0.06397    0.00038   -0.00059   -0.00956
AFIX 137
H2TD  2    0.476739    1.752585    1.137355    11.00000   -1.50000
H2TE  2    0.538695    1.804307    1.132807    11.00000   -1.50000
H2TF  2    0.547487    1.726671    1.130924    11.00000   -1.50000
AFIX   0

C1S2  1    0.252132    1.713184    1.094412    11.00000    0.06055    0.06765 =
         0.06153    0.01328    0.02839    0.00341
C2S2  1    0.313539    1.738364    1.116650    11.00000    0.08051    0.05909 =
         0.08809    0.00328    0.03250   -0.00332
AFIX 137
H2SP  2    0.327886    1.704847    1.132677    11.00000   -1.50000
H2SQ  2    0.304624    1.778360    1.128780    11.00000   -1.50000
H2SR  2    0.349746    1.748960    1.103574    11.00000   -1.50000
AFIX   0
N1S2  6    0.202732    1.689521    1.075987    11.00000    0.08516    0.13639 =
         0.08020    0.00604    0.03129   -0.02215

N1T9  6    0.482535    1.485555    0.581852    11.00000    0.08071    0.08717 =
         0.07762   -0.02611    0.03652   -0.01836
C1T9  1    0.508733    1.448601    0.597835    11.00000    0.07632    0.07372 =
         0.14612   -0.01815    0.05320   -0.01688
C2T9  1    0.543628    1.402638    0.620932    11.00000    0.09590    0.10703 =
         0.31041    0.05831    0.08937    0.01285
AFIX 137
H2TG  2    0.569350    1.373987    0.608686    11.00000   -1.50000
H2TH  2    0.509798    1.375516    0.630645    11.00000   -1.50000
H2TI  2    0.574987    1.427788    0.638855    11.00000   -1.50000
AFIX   0

PART 1
O1EW  7    0.707459    1.746485    0.775264    10.66667    0.06836    0.06410 =
         0.04358   -0.00357    0.00990    0.00115
C4EW  1    0.823634    1.762799    0.770575    10.66667    0.05601    0.07243 =
         0.07687    0.00151    0.00591    0.00787
AFIX 137
H4EA  2    0.818058    1.722348    0.756283    10.66667   -1.50000
H4EB  2    0.870334    1.768463    0.783024    10.66667   -1.50000
H4EC  2    0.814746    1.800850    0.756641    10.66667   -1.50000
AFIX   0
C2EW  1    0.654939    1.736880    0.794714    10.66667    0.07432    0.04558 =
         0.04522    0.00014    0.01576    0.00771
AFIX  23
H2EA  2    0.651652    1.777742    0.808074    10.66667   -1.20000
H2EB  2    0.664800    1.700770    0.810241    10.66667   -1.20000
AFIX   0
C1EW  1    0.587960    1.719086    0.770601    10.66667    0.06892    0.07064 =
         0.04190    0.00217    0.01762    0.01373
AFIX 137
H1EA  2    0.576731    1.756618    0.756631    10.66667   -1.50000
H1EB  2    0.551325    1.708627    0.783438    10.66667   -1.50000
H1EC  2    0.592966    1.680626    0.756306    10.66667   -1.50000
AFIX   0
C3EW  1    0.773874    1.757757    0.794932    10.66667    0.07414    0.04895 =
         0.06121   -0.00436   -0.00120    0.00282
AFIX  23
H3EA  2    0.783589    1.720749    0.809903    10.66667   -1.20000
H3EB  2    0.777328    1.799174    0.808815    10.66667   -1.20000
AFIX   0

PART 0
N1S7  6    0.677336    1.636324    1.015229    11.00000    0.05951    0.08288 =
         0.12255   -0.00658   -0.01895    0.00183
C1S7  1    0.622472    1.616547    1.012713    11.00000    0.09006    0.07039 =
         0.06218    0.01171    0.01546    0.01744
C2S7  1    0.549468    1.587393    1.007628    11.00000    0.05991    0.08934 =
         0.07914    0.03191    0.02114    0.01799
AFIX 137
H2SS  2    0.524932    1.601316    0.986316    11.00000   -1.50000
H2ST  2    0.527502    1.602875    1.025989    11.00000   -1.50000
H2SU  2    0.548590    1.539068    1.007278    11.00000   -1.50000
AFIX   0

C2T4  1    0.056133    1.764519    0.763869    11.00000    0.05446    0.06429 =
         0.05514    0.01331    0.01192    0.01230
AFIX 137
H2TJ  2    0.068832    1.768916    0.741661    11.00000   -1.50000
H2TK  2    0.097251    1.761256    0.780539    11.00000   -1.50000
H2TL  2    0.033102    1.803299    0.769460    11.00000   -1.50000
AFIX   0
C1T4  1    0.011034    1.706046    0.763792    11.00000    0.07687    0.05339 =
         0.04761    0.00645    0.00009    0.00800
N1T4  6   -0.024503    1.660070    0.763816    11.00000    0.13617    0.06627 =
         0.08943    0.01872   -0.02013   -0.02582

O1EU  7    0.195475    2.018687    0.833007    11.00000    0.09097    0.12689 =
         0.09210    0.00069    0.01142   -0.00599
C3EU  1    0.182420    2.060346    0.859193    11.00000    0.12617    0.20492 =
         0.06327    0.03158    0.02632    0.04373
AFIX  23
H3EC  2    0.224965    2.069268    0.875642    11.00000   -1.20000
H3ED  2    0.148294    2.036899    0.870724    11.00000   -1.20000
AFIX   0
C1EU  1    0.154920    1.941903    0.789189    11.00000    0.06777    0.08563 =
         0.12161    0.00080    0.01404    0.01864
AFIX 137
H1ED  2    0.174034    1.972859    0.774449    11.00000   -1.50000
H1EE  2    0.113848    1.917450    0.776748    11.00000   -1.50000
H1EF  2    0.188667    1.910817    0.797258    11.00000   -1.50000
AFIX   0
C2EU  1    0.137061    1.979149    0.818143    11.00000    0.06413    0.13151 =
         0.12620   -0.02073   -0.00597    0.00974
AFIX  23
H2EC  2    0.099300    2.007069    0.810536    11.00000   -1.20000
H2ED  2    0.122364    1.948188    0.834447    11.00000   -1.20000
AFIX   0
C4EU  1    0.156541    2.125546    0.847904    11.00000    0.09525    0.15377 =
         0.09089    0.01880    0.03243    0.01880
AFIX 137
H4ED  2    0.190838    2.150095    0.837331    11.00000   -1.50000
H4EE  2    0.147871    2.151463    0.867306    11.00000   -1.50000
H4EF  2    0.114145    2.117328    0.831760    11.00000   -1.50000
AFIX   0

N1S3  6    0.641383    1.667106    1.106295    11.00000    0.11161    0.06602 =
         0.09939    0.00888    0.02525    0.00667
C1S3  1    0.676250    1.705011    1.094474    11.00000    0.06755    0.05097 =
         0.08084   -0.00354    0.01007    0.00569
C2S3  1    0.717877    1.752899    1.079109    11.00000    0.07417    0.06017 =
         0.11227   -0.01344    0.03532   -0.00185
AFIX 137
H2SV  2    0.713184    1.797402    1.088002    11.00000   -1.50000
H2SW  2    0.702766    1.750605    1.054810    11.00000   -1.50000
H2SX  2    0.765751    1.742978    1.084156    11.00000   -1.50000
AFIX   0

N1S6  6   -0.200905    1.392884    0.654296    11.00000    0.07142    0.12864 =
         0.10164   -0.01632    0.00311   -0.01053
C2S6  1   -0.164033    1.520687    0.660948    11.00000    0.05818    0.09890 =
         0.08504    0.02600    0.01157    0.01658
AFIX 137
H2SY  2   -0.179947    1.542236    0.640092    11.00000   -1.50000
H     2   -0.114146    1.526537    0.666144    11.00000   -1.50000
HA    2   -0.183362    1.540549    0.679212    11.00000   -1.50000
AFIX   0
C1S6  1   -0.185943    1.449979    0.657050    11.00000    0.06092    0.07658 =
         0.07213   -0.00127   -0.00184    0.00425

PART 1
C2ET  1    0.062328    1.258101    0.555525    10.66667    0.06865
AFIX  23
H2EE  2    0.089486    1.226269    0.545660    10.66667   -1.20000
H2EF  2    0.029606    1.232246    0.566934    10.66667   -1.20000
AFIX   0
O1ET  7    0.028095    1.287934    0.531475    10.66667    0.11908
C3ET  1   -0.016035    1.256761    0.504924    10.66667    0.07111
AFIX  23
H3EE  2    0.001272    1.214400    0.498835    10.66667   -1.20000
H3EF  2   -0.019124    1.284850    0.485266    10.66667   -1.20000
AFIX   0
C1ET  1    0.105943    1.297552    0.579410    10.66667    0.07532
AFIX 137
H1EG  2    0.079267    1.323981    0.592251    10.66667   -1.50000
H1EH  2    0.135649    1.327002    0.568384    10.66667   -1.50000
H1EI  2    0.133851    1.269659    0.594537    10.66667   -1.50000
AFIX   0
C4ET  1   -0.083784    1.244351    0.514165    10.66667    0.12601
AFIX 137
H4EG  2   -0.112347    1.279750    0.506115    10.66667   -1.50000
H4EH  2   -0.079286    1.243135    0.538573    10.66667   -1.50000
H4EI  2   -0.104952    1.201882    0.503978    10.66667   -1.50000
AFIX   0

PART 0
C5F   1    0.669012    2.294779    0.655370    11.00000    0.10885
AFIX  43
H5F   2    0.678880    2.320495    0.637319    11.00000   -1.20000
AFIX   6

PART 1
B5A   3    0.708126    2.089266    0.576016    21.00000    0.03337    0.10589 =
         0.07975    0.03592    0.01684    0.00765
F17A  5    0.757655    2.063864    0.559520    21.00000    0.05984    0.11510 =
         0.06652    0.03128    0.02183    0.02076
F19A  5    0.688715    2.148488    0.561848    21.00000    0.11028    0.12099 =
         0.18494    0.05255    0.02780    0.03986
F20A  5    0.651016    2.043473    0.572703    21.00000    0.08857    0.15801 =
         0.07036   -0.01487    0.03486   -0.06452
F18A  5    0.735067    2.101167    0.609994    21.00000    0.04289    0.17931 =
         0.09319   -0.02861    0.01293   -0.00653
AFIX   6

PART 2
B5B   3    0.705942    2.041044    0.560481   -21.00000    0.06843    0.14951 =
         0.08657    0.04220    0.00202   -0.01319
F17B  5    0.759401    2.040435    0.541960   -21.00000    0.06797    0.17209 =
         0.11213    0.04511    0.01517   -0.00858
F19B  5    0.659057    2.084984    0.546595   -21.00000    0.08332    0.24031 =
         0.16810    0.05165    0.03140    0.06236
F20B  5    0.673182    1.977439    0.559652   -21.00000    0.16267    0.20856 =
         0.13345    0.05863   -0.01687   -0.09949
F18B  5    0.732148    2.061550    0.593727   -21.00000    0.11137    0.14807 =
         0.10641    0.02440    0.00370   -0.01253
AFIX   0

B7B   3    0.408613    1.222680    0.599055   -31.00000    0.05937    0.05110 =
         0.04910    0.01280    0.02095    0.00567
F25B  5    0.349639    1.219030    0.612641   -31.00000    0.05780    0.04542 =
         0.08057    0.00389    0.03715    0.00771
F28B  5    0.449077    1.172352    0.609276   -31.00000    0.06544    0.05582 =
         0.06176    0.01100    0.02600    0.01315
F27B  5    0.446083    1.280041    0.612449   -31.00000    0.07194    0.06669 =
         0.13700   -0.00245    0.00763   -0.00547
F26B  5    0.392516    1.225984    0.564939   -31.00000    0.08221    0.16432 =
         0.04696    0.02536    0.02007    0.04361
F16B  5    0.558353    1.281253    0.763297   -41.00000    0.07531    0.12514 =
         0.06908   -0.04489    0.01015   -0.02683
F14B  5    0.660143    1.329661    0.786721   -41.00000    0.04175    0.10465 =
         0.09190   -0.05843    0.00607    0.00008
B4B   3    0.592014    1.321263    0.788885   -41.00000    0.04096    0.07194 =
         0.06539   -0.02614   -0.00047    0.00346
F13B  5    0.582743    1.301374    0.819654   -41.00000    0.15292    0.15239 =
         0.06009    0.01999    0.01328    0.00013
F15B  5    0.567590    1.382593    0.788399   -41.00000    0.04193    0.08983 =
         0.13662   -0.00697    0.00995    0.01249
B2A   3    0.009296    1.695277    0.958139   -51.00000    0.04621    0.03972 =
         0.03987    0.00187    0.01579   -0.00057
F23A  5    0.039487    1.677847    0.989757   -51.00000    0.04397    0.04014 =
         0.03679    0.00025    0.00913    0.00025
F24A  5    0.044604    1.750917    0.948783   -51.00000    0.04855    0.04980 =
         0.05358    0.01197    0.01221   -0.00385
F20   5    0.010707    1.643395    0.935625   -51.00000    0.13650    0.05039 =
         0.04071   -0.00998   -0.00513    0.00265
F15   5   -0.057596    1.708774    0.958572   -51.00000    0.04361    0.10743 =
         0.09445    0.05054    0.01799    0.01548
B12B  3    0.718538    1.676822    0.883406   -61.00000    0.04021    0.12723 =
         0.08037   -0.06817    0.00773   -0.00378
F47B  5    0.734323    1.687319    0.852546   -61.00000    0.10670    0.22939 =
         0.09388   -0.07997    0.04680   -0.04172
F46B  5    0.650013    1.668962    0.881047   -61.00000    0.03942    0.15663 =
         0.08199   -0.07564    0.01477   -0.00007
F48B  5    0.745832    1.720268    0.908551   -61.00000    0.07179    0.21063 =
         0.11901   -0.12747    0.05072   -0.08255
F45B  5    0.748169    1.619752    0.890007   -61.00000    0.09446    0.17452 =
         0.27690   -0.02573    0.02244    0.05312
PART -1
AFIX   6
C1EV  1    0.451849    1.945901    0.540726    10.50000    0.08709
C2EV  1    0.472721    2.014733    0.530473    10.50000    0.17827
O1EV  7    0.500381    2.009184    0.500495    10.50000    0.14051
C3EV  1    0.521691    2.071106    0.488596    10.50000    0.25281
C4EV  1    0.550239    2.059081    0.456682    10.50000    0.30950
AFIX   0

PART 1
O1W   7    0.639686    1.941834    0.523990    10.50000    0.11415

PART 2
N1T3  6   -0.206317    1.748587    0.732231    10.33333    0.04577    0.07241 =
         0.05486   -0.00187   -0.00106    0.00522

N1T5  6    0.521420    1.665073    0.746187    10.33333    0.08475    0.08612 =
         0.06535    0.00518    0.01537   -0.00065
C2T3  1   -0.164665    1.753917    0.797297    10.33333    0.07168    0.08024 =
         0.05874    0.00457    0.01431    0.00460
AFIX 137
H2TM  2   -0.150600    1.800130    0.804358    10.33333   -1.50000
H2TN  2   -0.125677    1.727176    0.802693    10.33333   -1.50000
H2TO  2   -0.201315    1.737602    0.809038    10.33333   -1.50000
AFIX   0

C1T5  1    0.560348    1.697766    0.761555    10.33333    0.10359    0.07421 =
         0.05485    0.00370    0.02763   -0.00430
C2T5  1    0.616531    1.734463    0.783156    10.33333    0.10090    0.06012 =
         0.07364    0.00487    0.02788    0.00001
AFIX 137
H2TP  2    0.649198    1.752906    0.769638    10.33333   -1.50000
H2TQ  2    0.639217    1.704907    0.799345    10.33333   -1.50000
H2TR  2    0.599252    1.770445    0.795123    10.33333   -1.50000
AFIX   0

C1T3  1   -0.189579    1.749119    0.760542    10.33333    0.05601    0.07243 =
         0.07687    0.00151    0.00591    0.00787
PART 0
AFIX   6
N1T2  6    0.146396    1.524349    0.898562    11.00000    0.09008
C1T2  1    0.167393    1.478480    0.911962    11.00000    0.07344
C2T2  1    0.193640    1.421133    0.928755    11.00000    0.11715
AFIX 137
H2TS  2    0.222907    1.399802    0.915209    11.00000   -1.50000
H2TT  2    0.155503    1.389813    0.931667    11.00000   -1.50000
H2TU  2    0.220208    1.435115    0.950713    11.00000   -1.50000
AFIX   6

N1T8  6    0.617634    1.319879    0.560529    10.50000    0.11951
C1T8  1    0.590035    1.267236    0.555548    10.50000    0.08071
C2T8  1    0.555379    1.201438    0.549233    10.50000    0.09128
AFIX 137
H2TV  2    0.517255    1.197282    0.561668    10.50000   -1.50000
H2TW  2    0.587482    1.168392    0.556547    10.50000   -1.50000
H2TX  2    0.538043    1.194293    0.525230    10.50000   -1.50000
AFIX   6

PART 2
N1T7  6   -0.214274    1.269662    0.591817    10.33333    0.08125
C1T7  1   -0.178862    1.256937    0.572909    10.33333    0.06163
C2T7  1   -0.134613    1.241069    0.549215    10.33333    0.07590
AFIX 137
H2TY  2   -0.086900    1.251275    0.559674    10.33333   -1.50000
HB    2   -0.144879    1.267287    0.529354    10.33333   -1.50000
HC    2   -0.142223    1.193943    0.542639    10.33333   -1.50000
AFIX   0

PART 0
N1I   6    0.446900    2.275366    1.037660    11.00000    0.04297    0.04000 =
         0.05048   -0.00953    0.00445   -0.00211
HKLF 4


REM  cut83_a.res in P-1
REM wR2 = 0.1838, GooF = S = 1.021, Restrained GooF = 1.024 for all data
REM R1 = 0.0601 for 51462 Fo > 4sig(Fo) and 0.0692 for all 60876 data
REM 4527 parameters refined using 774 restraints

END

WGHT      0.1123     16.9317

REM Highest difference peak  1.721,  deepest hole -0.913,  1-sigma level  0.078
Q1    1   0.5750  1.2326  0.5556  11.00000  0.05    1.72
Q2    1   0.3831  1.7462  1.1025  11.00000  0.05    1.45
Q3    1  -0.2469  1.3008  0.5814  11.00000  0.05    1.42
Q4    1   0.6036  1.2939  0.5590  11.00000  0.05    1.36
Q5    1  -0.1427  1.2374  0.5856  11.00000  0.05    1.36
Q6    1   0.0018  1.2512  0.5413  11.00000  0.05    1.31
Q7    1   0.5223  1.1601  0.5378  11.00000  0.05    1.24
Q8    1  -0.1712  1.2498  0.5600  11.00000  0.05    1.17
Q9    1   0.0655  1.0899  0.6588  11.00000  0.05    1.03
Q10   1  -0.0575  1.2505  0.5575  11.00000  0.05    1.02
Q11   1   0.4442  1.7566  1.1210  11.00000  0.05    0.89
Q12   1   0.6029  2.2986  0.6584  11.00000  0.05    0.84
Q13   1   0.2034  1.4153  0.9055  11.00000  0.05    0.83
Q14   1   0.1763  1.4774  0.9005  11.00000  0.05    0.81
Q15   1   0.6091  1.3560  0.5556  11.00000  0.05    0.80
Q16   1   0.5964  2.2313  0.6526  11.00000  0.05    0.80
Q17   1   0.6841  1.3257  0.5663  11.00000  0.05    0.79
Q18   1   0.0809  1.2802  0.5594  11.00000  0.05    0.79
Q19   1   0.1998  1.4359  0.9440  11.00000  0.05    0.79
Q20   1   0.5828  1.6260  1.0315  11.00000  0.05    0.77
Q21   1   0.1417  1.5143  0.9073  11.00000  0.05    0.76
Q22   1   0.5392  1.3801  0.5745  11.00000  0.05    0.75
Q23   1   0.7524  1.6104  1.0021  11.00000  0.05    0.72
Q24   1  -0.1762  1.1206  0.7689  11.00000  0.05    0.64
Q25   1   0.1442  2.0190  0.8490  11.00000  0.05    0.62
Q26   1  -0.2687  1.3266  0.5575  11.00000  0.05    0.61
Q27   1  -0.2053  1.3119  0.6565  11.00000  0.05    0.60
Q28   1   0.1562  2.0769  0.8335  11.00000  0.05    0.59
Q29   1   0.6620  1.6076  1.0313  11.00000  0.05    0.58
Q30   1   0.4613  1.1328  0.5169  11.00000  0.05    0.58
Q31   1   0.5787  1.8721  0.6762  11.00000  0.05    0.58
Q32   1   0.5000  2.0485  0.4759  11.00000  0.05    0.58
Q33   1   0.6810  2.2051  0.7092  11.00000  0.05    0.57
Q34   1   0.5616  1.3601  0.7427  11.00000  0.05    0.57
Q35   1  -0.0055  1.9477  0.7784  11.00000  0.05    0.57
Q36   1   0.0900  1.2376  0.5650  11.00000  0.05    0.57
Q37   1   0.5939  1.8733  0.5011  11.00000  0.05    0.56
Q38   1   0.5082  1.4399  0.5744  11.00000  0.05    0.55
Q39   1   0.4884  2.0421  0.5489  11.00000  0.05    0.55
Q40   1   0.6505  2.0625  0.6439  11.00000  0.05    0.54
Q41   1   0.6663  2.0910  0.6762  11.00000  0.05    0.53
Q42   1   0.4584  1.9785  0.5476  11.00000  0.05    0.53
Q43   1   0.6360  2.3324  0.6808  11.00000  0.05    0.51
Q44   1  -0.0829  1.8553  0.7716  11.00000  0.05    0.51
Q45   1   0.6983  2.2157  0.6540  11.00000  0.05    0.50
Q46   1   0.7061  2.3153  0.6906  11.00000  0.05    0.50
Q47   1   0.4851  1.6891  0.5462  11.00000  0.05    0.48
Q48   1   0.1551  2.0510  0.8200  11.00000  0.05    0.47
Q49   1  -0.2465  1.2818  0.7047  11.00000  0.05    0.46
Q50   1   0.7383  2.1836  0.6689  11.00000  0.05    0.46
Q51   1  -0.1165  1.1750  0.7284  11.00000  0.05    0.46
Q52   1   0.0502  1.1401  0.7556  11.00000  0.05    0.45
Q53   1  -0.0846  1.1698  0.7002  11.00000  0.05    0.44
Q54   1  -0.1400  1.1195  0.7405  11.00000  0.05    0.44
Q55   1   0.0736  1.1889  0.7799  11.00000  0.05    0.44
Q56   1   0.7050  1.6238  0.9913  11.00000  0.05    0.44
Q57   1   0.5541  2.0813  0.4678  11.00000  0.05    0.44
Q58   1   0.8667  1.7684  0.9774  11.00000  0.05    0.43
Q59   1   0.5826  1.7503  0.5812  11.00000  0.05    0.42
Q60   1   0.6175  1.9741  0.6776  11.00000  0.05    0.42
Q61   1   0.6818  2.1757  0.6794  11.00000  0.05    0.42
Q62   1   0.7163  2.2789  0.6566  11.00000  0.05    0.41
Q63   1  -0.1509  1.1682  0.7934  11.00000  0.05    0.41
Q64   1   0.6973  1.5957  0.9014  11.00000  0.05    0.41
Q65   1   0.7206  2.1306  0.5929  11.00000  0.05    0.41
Q66   1   0.6774  1.7151  0.8803  11.00000  0.05    0.41
Q67   1   0.8529  1.8433  0.9742  11.00000  0.05    0.41
Q68   1   0.4404  2.0309  0.5065  11.00000  0.05    0.40
Q69   1   0.2827  1.3373  0.7303  11.00000  0.05    0.40
Q70   1   0.7042  2.2784  0.7097  11.00000  0.05    0.39
Q71   1   0.6585  1.5372  0.7428  11.00000  0.05    0.39
Q72   1   0.5973  1.6494  1.0597  11.00000  0.05    0.39
Q73   1  -0.2529  1.2275  0.5861  11.00000  0.05    0.39
Q74   1   0.7772  1.5678  0.7373  11.00000  0.05    0.38
Q75   1   0.1956  2.1314  0.8687  11.00000  0.05    0.38
Q76   1   0.0652  1.2651  0.8970  11.00000  0.05    0.38
Q77   1  -0.1649  1.5600  0.6803  11.00000  0.05    0.38
Q78   1   0.1331  1.2340  0.5727  11.00000  0.05    0.38
Q79   1   0.7049  2.1380  0.5668  11.00000  0.05    0.37
Q80   1   0.4457  2.0880  0.4955  11.00000  0.05    0.37
Q81   1   0.4519  2.0833  0.4848  11.00000  0.05    0.37
Q82   1  -0.0875  1.1750  0.8144  11.00000  0.05    0.37
Q83   1   0.4737  2.0591  0.5124  11.00000  0.05    0.36
Q84   1   0.1620  1.8919  1.0183  11.00000  0.05    0.35
Q85   1   0.3768  1.3246  0.8037  11.00000  0.05    0.35
Q86   1   0.6947  2.1134  0.5637  11.00000  0.05    0.35
Q87   1  -0.2596  1.2325  0.6026  11.00000  0.05    0.35
Q88   1   0.2206  1.3968  0.9645  11.00000  0.05    0.35
Q89   1  -0.0429  1.1042  0.6526  11.00000  0.05    0.34
Q90   1   0.2793  1.7284  1.0107  11.00000  0.05    0.34
Q91   1   0.6428  2.0299  0.6915  11.00000  0.05    0.34
Q92   1  -0.0613  1.2242  0.8383  11.00000  0.05    0.34
Q93   1   0.1188  1.9597  0.8394  11.00000  0.05    0.34
Q94   1   0.1978  1.1443  0.6479  11.00000  0.05    0.33
Q95   1   0.7056  1.6515  1.1097  11.00000  0.05    0.33
Q96   1   0.6030  1.7970  0.6059  11.00000  0.05    0.33
Q97   1   0.6245  1.9900  0.6405  11.00000  0.05    0.33
Q98   1   0.0178  1.1856  0.9124  11.00000  0.05    0.33
Q99   1   0.7589  1.6629  0.9957  11.00000  0.05    0.33
;
_shelx_res_checksum                25383
_shelx_hkl_file
;
   0   0  -1    0.02    0.02
   0   0   1   -0.02    0.03
   0   0   1    0.03    0.06
   0   0  -2    3.40    0.19
   0   0  -2    3.39    0.19
   0   0   2    3.32    0.19
   0   0   2    3.78    0.21
   0   0  -2    3.51    0.22
   0   0   2    3.54    0.22
   0   0   2    3.43    0.21
   0   0  -3   25.21    0.84
   0   0  -3   23.89    0.81
   0   0   3   24.29    0.83
   0   0   3   24.27    0.81
   0   0  -3   25.92    0.87
   0   0  -3   28.16    0.94
   0   0   3   26.34    0.87
   0   0   3   25.67    0.86
   0   0  -4    2.70    0.27
   0   0  -4    2.78    0.29
   0   0   4    3.18    0.27
   0   0   4    3.43    0.32
   0   0  -4    3.74    0.35
   0   0  -4    3.54    0.32
   0   0   4    3.45    0.33
   0   0   4    3.69    0.33
   0   0  -5    0.27    0.24
   0   0  -5    0.22    0.22
   0   0   5   -0.08    0.24
   0   0   5    0.64    0.22
   0   0  -5    0.51    0.30
   0   0  -5    0.52    0.29
   0   0   5    0.65    0.32
   0   0   5    0.25    0.27
   0   0  -6 2523.99   69.36
   0   0  -6 2549.42   70.11
   0   0   6 2536.70   69.73
   0   0   6 2530.35   69.57
   0   0  -6 2482.66   67.03
   0   0  -6 2589.15   69.89
   0   0   6 2549.42   68.79
   0   0   6 2409.55   65.04
   0   0  -7    3.66    0.48
   0   0  -7    2.94    0.43
   0   0   7    3.24    0.46
   0   0   7    3.48    0.41
   0   0  -7    2.67    0.52
   0   0  -7    3.34    0.49
   0   0   7    2.92    0.49
   0   0   7    4.24    0.51
   0   0  -8    4.93    0.51
   0   0  -8    5.53    0.57
   0   0   8    5.53    0.52
   0   0   8    4.42    0.54
   0   0  -8    5.53    0.64
   0   0  -8    4.88    0.59
   0   0   8    5.36    0.59
   0   0   8    4.63    0.56
   0   0  -9  717.94   20.12
   0   0  -9  733.99   20.54
   0   0   9  723.82   20.25
   0   0   9  733.04   20.54
   0   0  -9  707.29   19.50
   0   0  -9  742.10   20.44
   0   0   9  704.90   19.42
   0   0   9  714.44   19.66
   0   0 -10  121.69    3.83
   0   0 -10  124.44    3.93
   0   0  10  120.80    3.83
   0   0  10  121.11    3.80
   0   0 -10  115.52    3.67
   0   0 -10  120.10    3.80
   0   0  10  120.73    3.78
   0   0  10  126.98    3.94
   0   0 -11  298.97    8.73
   0   0 -11  298.65    8.73
   0   0  11  295.95    8.63
   0   0  11  284.66    8.38
   0   0 -11  303.10    8.77
   0   0 -11  307.39    8.88
   0   0  11  302.94    8.73
   0   0  11  294.52    8.50
   0   0 -12  721.12   20.33
   0   0 -12  770.07   21.66
   0   0  12  744.96   21.03
   0   0  12  744.80   20.95
   0   0 -12  764.03   21.22
   0   0 -12  753.54   20.93
   0   0  12  727.63   20.19
   0   0  12  782.79   21.65
   0   0 -13   86.51    2.99
   0   0 -13   84.81    2.96
   0   0  13   84.30    2.91
   0   0  13   86.59    3.05
   0   0 -13   82.43    2.97
   0   0 -13   89.17    3.13
   0   0  13   88.31    3.07
   0   0  13   88.42    3.05
   0   0 -14  482.23   13.88
   0   0 -14  458.70   13.24
   0   0  14  464.74   13.48
   0   0  14  463.00   13.32
   0   0 -14  468.24   13.40
   0   0 -14  463.95   13.26
   0   0  14  466.81   13.29
   0   0  14  478.73   13.59
   0   0 -15    7.12    0.76
   0   0 -15    6.28    0.72
   0   0  15    5.79    0.67
   0   0  15    7.31    0.81
   0   0 -15    5.72    0.84
   0   0 -15    6.48    0.84
   0   0  15    7.04    0.83
   0   0  15    5.96    0.76
   0   0 -16    2.99    0.60
   0   0 -16    3.80    0.60
   0   0  16    3.04    0.65
   0   0  16    3.46    0.57
   0   0 -16    4.93    0.84
   0   0 -16    3.80    0.73
   0   0  16    4.01    0.73
   0   0  16    3.16    0.68
   0   0 -17   72.22    2.73
   0   0 -17   74.85    2.83
   0   0  17   76.64    2.96
   0   0  17   76.82    2.83
   0   0 -17   71.73    2.89
   0   0 -17   71.03    2.83
   0   0  17   77.96    2.96
   0   0  17   79.60    2.97
   0   0 -18  118.49    4.07
   0   0 -18  111.45    3.89
   0   0  18  120.48    4.21
   0   0  18  122.40    4.16
   0   0 -18  112.15    4.07
   0   0 -18  113.42    4.05
   0   0  18  114.18    4.02
   0   0  18  114.45    3.97
   0   0 -19  112.37    3.96
   0   0 -19  121.64    4.20
   0   0  19  118.87    4.21
   0   0  19  118.57    4.07
   0   0 -19  119.14    4.31
   0   0 -19  117.70    4.21
   0   0  19  126.22    4.40
   0   0  19  116.46    4.07
   0   0 -20   85.70    3.24
   0   0 -20   89.21    3.32
   0   0  20   90.04    3.31
   0   0  20   87.86    3.39
   0   0 -20   91.68    3.62
   0   0 -20   86.94    3.40
   0   0 -21   33.17    1.78
   0   0 -21   33.66    1.76
   0   0  21   36.24    1.92
   0   0  21   33.04    1.72
   0   0 -21   31.53    1.88
   0   0 -21   33.54    2.02
   0   0  21   32.28    1.86
   0   0  21   35.92    1.89
   0   0 -22   59.35    2.57
   0   0 -22   63.88    2.70
   0   0  22   59.48    2.65
   0   0  22   53.05    2.42
   0   0 -22   62.35    2.81
   0   0 -22   62.07    2.91
   0   0  22   65.91    2.85
   0   0  22   63.96    2.73
   0   0 -23  122.37    4.56
   0   0 -23  120.56    4.61
   0   0  23  121.32    4.42
   0   0  23  119.52    4.29
   0   0 -24 2037.63   56.87
   0   0  24 2104.38   58.70
   0   0  24 2075.77   57.04
   0   0  24 2144.12   58.79
   0   0 -25    1.53    0.67
   0   0 -25    2.46    0.65
   0   0  25    1.30    0.57
   0   0  25    1.65    0.70
   0   0 -25    1.75    0.89
   0   0 -25    1.22    0.78
   0   0  25    1.76    0.73
   0   0  25    1.67    0.75
   0   0 -26   81.71    3.32
   0   0 -26   77.47    3.21
   0   0  26   79.69    3.23
   0   0  26   79.52    3.35
   0   0 -26   75.00    3.46
   0   0 -26   72.30    3.31
   0   0  26   74.35    3.24
   0   0  26   75.26    3.19
   0   0 -27   96.33    3.80
   0   0 -27   89.18    3.56
   0   0  27   92.69    3.62
   0   0  27  102.88    4.05
   0   0 -27   98.29    4.20
   0   0 -27   95.98    4.05
   0   0  27   88.55    3.69
   0   0  27   87.64    3.58
   0   0 -28   24.57    1.68
   0   0 -28   24.79    1.72
   0   0  28   26.38    1.88
   0   0  28   22.76    1.56
   0   0 -28   24.41    2.05
   0   0 -28   23.06    1.91
   0   0  28   22.90    1.73
   0   0  28   22.87    1.72
   0   0 -29  113.66    4.32
   0   0 -29  112.48    4.29
   0   0  29  105.63    4.45
   0   0  29  118.46    4.43
   0   0 -29  115.63    4.85
   0   0 -29  114.79    4.69
   0   0  29  115.53    4.55
   0   0  29  115.58    4.42
   0   0 -30   91.96    3.75
   0   0 -30   87.27    3.64
   0   0  30   90.55    3.97
   0   0 -30   88.63    4.15
   0   0 -30   88.24    4.01
   0   0  30   91.57    3.91
   0   0  30   91.09    3.85
   0   0 -31    6.66    0.99
   0   0 -31    8.14    1.08
   0   0  31    5.63    1.10
   0   0  31    5.71    0.95
   0   0 -31    4.51    1.18
   0   0 -31    5.39    1.19
   0   0  31    5.93    1.11
   0   0  31    5.98    1.08
   0   0 -32    0.14    0.65
   0   0 -32    1.18    0.72
   0   0  32   -0.56    0.67
   0   0  32    0.03    0.62
   0   0 -32    1.43    1.05
   0   0 -32   -0.08    0.99
   0   0  32   -0.03    0.73
   0   0  32    0.43    0.78
   0   0 -33   95.67    3.97
   0   0 -33  100.42    4.10
   0   0  33   97.16    3.91
   0   0  33   93.27    4.10
   0   0 -33   90.17    4.47
   0   0 -33   91.98    4.32
   0   0  33   96.91    4.20
   0   0  33   98.58    4.15
   0   0 -34    1.91    0.81
   0   0 -34    1.99    0.81
   0   0  34    2.34    0.87
   0   0  34    2.50    0.79
   0   0 -34    0.54    1.10
   0   0 -34    3.75    1.13
   0   0  34   -0.13    0.83
   0   0  34    2.81    0.99
   0   0 -35    0.86    0.79
   0   0  35    3.66    0.87
   0   0  35    3.99    1.05
   0   0 -35    3.02    1.29
   0   0 -35    1.64    1.14
   0   0  35    1.27    0.97
   0   0  35    3.83    1.02
   0   0 -36   -0.22    0.67
   0   0 -36    0.64    0.70
   0   0  36    1.00    0.70
   0   0  36    1.86    0.86
   0   0 -36    0.33    1.16
   0   0 -36    1.45    1.06
   0   0  36    0.32    0.94
   0   0 -37   -0.41    0.70
   0   0 -37   -0.62    0.62
   0   0  37    0.43    0.64
   0   0  37    0.05    0.78
   0   0  37    0.41    0.94
   0   0 -38   24.92    2.05
   0   0 -38   29.90    2.07
   0   0  38   26.26    1.92
   0   0  38   28.99    2.32
   0   0 -39   24.68    2.05
   0   0 -39   27.26    2.02
   0   0  39   24.86    2.29
   0   0  40   -1.67    0.83
   0   0 -40    1.32    1.27
   0   0 -40    0.17    1.38
   0   0  40   -0.05    0.81
   0   0 -41    2.67    0.83
   0   0 -41    2.86    0.94
   0   0  41    1.72    0.79
   0   0 -41    1.11    1.27
   0   0 -41    3.27    1.34
   0   0  41    1.30    0.94
   0   0  41    0.95    0.97
   0   0 -42    1.06    0.73
   0   0 -42    1.72    0.83
   0   0  42    1.54    0.94
   0   0  42    0.89    0.78
   0   0 -42    0.49    1.32
   0   0 -42    1.03    1.10
   0   0  42    1.48    0.95
   0   0  42    1.30    0.99
   0   0 -43    2.02    0.89
   0   0 -43    3.64    0.99
   0   0  43    1.48    0.99
   0   0  43    2.42    0.91
   0   0 -43    3.10    1.54
   0   0 -43    0.62    1.24
   0   0  43    2.64    1.16
   0   0  43    2.85    1.19
   0   0 -44    3.16    1.00
   0   0 -44    2.97    1.05
   0   0  44    4.51    1.10
   0   0  44    6.17    1.34
   0   0 -44    7.10    1.80
   0   0 -44    5.44    1.54
   0   0  44    5.79    1.34
   0   0  44    6.01    1.41
   0   0 -45    3.91    1.03
   0   0 -45    3.04    1.00
   0   0  45    1.27    0.97
   0   0  45    4.91    1.08
   0   0 -45    6.53    1.73
   0   0 -45    4.15    1.43
   0   0  45    3.39    1.11
   0   0  45    5.26    1.27
   0   0 -46    6.25    1.14
   0   0 -46    5.23    1.21
   0   0  46    6.41    1.40
   0   0  46    8.55    1.32
   0   0 -46    5.17    1.80
   0   0 -46    9.06    1.86
   0   0 -47    2.07    0.92
   0   0 -47    1.89    0.87
   0   0  47    1.30    0.92
   0   0  47    0.86    0.73
   0   0 -47    3.46    1.38
   0   0 -47    2.16    1.45
   0   0 -48    8.79    1.37
   0   0 -48    8.41    1.38
   0   0  48   10.44    1.46
   0   0  48    7.76    1.51
   0   0 -49   -0.02    0.78
   0   0 -49    1.06    0.81
   0   0  49    0.89    0.83
   0   0  49   -0.14    0.81
   0  -1  49   -0.92    0.81
   0  -1  49    0.41    0.87
   0   1 -49   -0.52    0.72
   0   1 -49    1.46    0.83
   0  -1  48   -0.33    0.86
   0  -1  48    0.78    0.86
   0   1 -48    0.24    0.70
   0   1 -48    1.70    0.84
   0  -1  47    3.48    1.00
   0  -1  47    3.37    1.14
   0   1 -47    2.86    0.94
   0   1 -47    3.74    0.95
   0   1 -47    3.93    1.43
   0   1 -47    3.77    1.61
   0  -1  46    0.87    0.94
   0  -1  46    1.62    0.95
   0   1 -46    1.40    0.89
   0   1 -46    2.50    0.87
   0  -1  46    0.72    1.14
   0  -1  46    0.11    0.97
   0   1 -46    1.86    1.38
   0   1 -46    2.50    1.62
   0  -1  45   21.63    2.29
   0  -1  45   18.72    1.86
   0   1 -45   25.26    2.13
   0   1 -45   20.12    1.86
   0  -1  45   24.43    2.43
   0  -1  45   22.44    2.42
   0   1 -45   24.75    2.83
   0   1 -45   25.61    2.89
   0  -1  44   38.75    2.96
   0  -1  44   46.06    2.80
   0   1 -44   40.13    2.59
   0   1 -44   42.26    2.81
   0  -1  44   37.78    3.10
   0  -1  44   42.53    3.19
   0   1 -44   46.62    3.77
   0   1 -44   41.34    3.51
   0  -1  43    3.34    1.11
   0  -1  43    2.72    0.95
   0   1 -43    4.94    1.02
   0   1 -43    4.78    1.06
   0  -1  43    2.07    1.18
   0  -1  43    3.29    1.22
   0   1 -43    2.32    1.46
   0   1 -43    5.90    1.73
   0  -1  42    7.52    1.37
   0  -1  42    4.90    1.06
   0   1 -42    6.47    1.13
   0   1 -42    5.32    1.16
   0  -1  42    7.45    1.41
   0  -1  42    5.17    1.32
   0   1 -42    7.10    1.65
   0   1 -42    6.25    1.72
   0  -1  41   15.19    1.65
   0  -1  41   18.07    1.99
   0  -1  41   18.33    1.99
   0   1 -41   15.02    2.24
   0   1 -41   16.48    2.34
   0  -1  40    0.60    0.92
   0   1 -40   -0.32    0.76
   0   1 -40   -0.99    0.73
   0  -1  40    1.45    1.06
   0  -1  40    0.89    0.97
   0   1 -40    2.59    1.40
   0   1 -40   -1.37    1.06
   0  -1  39  259.71    8.81
   0  -1  39  237.30    8.65
   0   1 -39  233.17    7.95
   0   1 -39  250.65    8.66
   0  -1  39  248.11    8.84
   0  -1  39  238.25    8.54
   0   1 -39  259.55    9.74
   0   1 -39  263.21    9.95
   0  -1  38   53.37    3.23
   0  -1  38   60.65    3.10
   0   1 -38   56.85    3.05
   0   1 -38   51.75    2.80
   0  -1  38   52.20    3.31
   0  -1  38   53.32    3.19
   0   1 -38   59.46    3.85
   0   1 -38   57.82    3.86
   0  -1  37    6.50    1.27
   0  -1  37    7.88    1.16
   0   1 -37    7.09    1.10
   0   1 -37    5.17    1.10
   0  -1  37    7.18    1.30
   0   1 -37    4.70    1.45
   0   1 -37    4.74    1.56
   0   1 -36   11.86    1.32
   0   1 -36   13.06    1.53
   0  -1  36    9.00    1.45
   0  -1  35   94.78    3.94
   0  -1  35   98.16    4.40
   0   1 -35   91.45    3.86
   0   1 -35   98.11    4.20
   0  -1  34   47.32    2.72
   0  -1  34   46.41    2.48
   0  -1  34   44.81    2.92
   0   1 -34   46.39    3.39
   0  -1  33    0.17    0.68
   0  -1  33    0.60    0.64
   0   1 -33   -0.45    0.64
   0   1 -33   -0.33    0.64
   0  -1  33    0.25    0.86
   0  -1  33    1.72    0.89
   0   1 -33    1.46    1.05
   0   1 -33   -1.68    0.99
   0  -1  32    7.01    1.00
   0  -1  32    7.79    1.13
   0   1 -32    5.25    0.95
   0   1 -32    7.44    1.06
   0  -1  32    8.23    1.26
   0  -1  32    7.49    1.19
   0   1 -32   10.82    1.57
   0   1 -32    6.99    1.40
   0  -1  31   41.79    2.48
   0  -1  31   41.63    2.27
   0   1 -31   45.31    2.37
   0   1 -31   42.09    2.30
   0  -1  31   42.72    2.67
   0  -1  31   37.24    2.37
   0   1 -31   44.14    2.81
   0   1 -31   41.15    2.80
   0  -1  30    0.33    0.67
   0  -1  30    0.03    0.57
   0   1 -30    0.38    0.60
   0   1 -30    1.03    0.67
   0  -1  30    0.89    0.83
   0  -1  30    1.08    0.76
   0   1 -30    1.88    0.95
   0   1 -30   -1.26    0.87
   0  -1  29    3.83    0.99
   0   1 -29    5.52    0.91
   0   1 -29    6.12    0.94
   0  -1  29    3.46    0.99
   0  -1  29    6.01    1.03
   0   1 -29    4.28    1.18
   0   1 -29    6.39    1.30
   0  -1  28    4.48    0.92
   0  -1  28    5.31    0.84
   0   1 -28    4.63    0.86
   0   1 -28    5.53    0.92
   0  -1  28    5.02    1.05
   0  -1  28    4.99    1.00
   0   1 -28    5.75    1.14
   0   1 -28    4.72    1.19
   0  -1  27   47.62    2.29
   0  -1  27   45.74    2.40
   0   1 -27   47.29    2.35
   0   1 -27   45.22    2.26
   0  -1  27   45.57    2.57
   0  -1  27   48.03    2.53
   0  -1  26    1.27    0.70
   0  -1  26    1.84    0.65
   0   1 -26    1.75    0.67
   0   1 -26    1.59    0.62
   0  -1  26    2.83    0.87
   0  -1  26    1.88    0.75
   0   1 -26    1.86    0.89
   0   1 -26    3.15    0.99
   0  -1  25    2.21    0.72
   0  -1  25    3.61    0.72
   0   1 -25    1.80    0.64
   0   1 -25    2.75    0.72
   0  -1  25    2.78    0.89
   0  -1  25    3.56    0.86
   0   1 -25    3.29    1.02
   0  -1  24  359.53   11.13
   0  -1  24  356.51   10.86
   0  -1  24  333.94   10.33
   0   1 -24  344.58   10.79
   0   1 -24  363.98   11.30
   0  -1  23    2.29    0.72
   0   1 -23    2.64    0.79
   0  -1  23    4.96    0.94
   0  -1  23    2.77    0.78
   0   1 -23    2.51    0.89
   0   1 -23    2.37    0.89
   0  -1  22    5.50    0.86
   0  -1  22    5.58    0.79
   0   1 -22    6.80    0.87
   0   1 -22    7.37    0.87
   0  -1  22    5.96    0.94
   0  -1  22    5.93    0.95
   0   1 -22    5.05    1.00
   0   1 -22    4.69    0.99
   0  -1  21 1581.15   44.20
   0  -1  21 1625.97   45.57
   0   1 -21 1667.29   46.60
   0   1 -21 1632.33   45.66
   0  -1  21 1567.96   43.36
   0  -1  21 1540.30   42.55
   0   1 -21 1633.92   45.23
   0   1 -21 1641.86   45.46
   0  -1  20  109.99    3.86
   0  -1  20  109.42    3.97
   0   1 -20  108.30    3.86
   0   1 -20  109.03    3.86
   0  -1  20  106.76    4.01
   0  -1  20  108.84    3.97
   0   1 -20   99.05    3.86
   0   1 -20  104.73    4.01
   0  -1  19   20.77    1.29
   0  -1  19   19.53    1.35
   0   1 -19   21.77    1.32
   0   1 -19   18.77    1.24
   0  -1  19   17.74    1.40
   0  -1  19   20.55    1.43
   0   1 -19   18.71    1.49
   0   1 -19   18.45    1.48
   0  -1  18    6.42    0.84
   0  -1  18    6.69    0.76
   0   1 -18    4.56    0.70
   0   1 -18    6.55    0.79
   0  -1  18    6.74    0.94
   0  -1  18    5.15    0.84
   0   1 -18    4.59    0.89
   0   1 -18    5.20    0.92
   0  -1  17   72.38    2.81
   0  -1  17   79.60    2.91
   0   1 -17   73.92    2.80
   0   1 -17   68.41    2.62
   0  -1  17   71.56    2.86
   0  -1  17   72.97    2.86
   0   1 -17   68.44    2.85
   0   1 -17   75.23    3.02
   0  -1  16   35.36    1.62
   0  -1  16   35.35    1.70
   0   1 -16   34.36    1.62
   0   1 -16   37.88    1.72
   0  -1  16   38.92    1.92
   0  -1  16   37.64    1.83
   0   1 -16   35.49    1.88
   0   1 -16   31.18    1.76
   0  -1  15 1089.70   30.52
   0  -1  15 1106.71   31.06
   0   1 -15 1122.28   31.42
   0   1 -15 1083.19   30.36
   0  -1  15 1104.64   30.60
   0  -1  15 1158.52   31.98
   0   1 -15 1141.20   31.65
   0   1 -15 1113.54   30.85
   0  -1  14  529.27   15.13
   0  -1  14  523.55   15.04
   0   1 -14  543.90   15.54
   0   1 -14  526.73   15.08
   0  -1  14  532.61   15.18
   0  -1  14  528.96   15.02
   0   1 -14  524.03   15.00
   0   1 -14  535.47   15.26
   0  -1  13   12.30    0.87
   0  -1  13   10.49    0.86
   0   1 -13   11.30    0.83
   0   1 -13   10.17    0.83
   0  -1  13   13.83    1.11
   0  -1  13   12.97    1.02
   0   1 -13   13.30    1.13
   0   1 -13   13.91    1.10
   0  -1  12 6131.96  168.32
   0  -1  12 5807.72  159.58
   0   1 -12 5930.10  162.76
   0   1 -12 5931.69  162.91
   0  -1  12 5922.15  159.74
   0  -1  12 5702.82  153.89
   0   1 -12 6038.18  163.07
   0   1 -12 5930.10  160.05
   0  -1  11   57.74    2.13
   0  -1  11   57.79    2.08
   0   1 -11   53.28    1.97
   0   1 -11   60.05    2.15
   0  -1  11   53.40    2.15
   0  -1  11   54.17    2.13
   0   1 -11   55.31    2.24
   0   1 -11   56.63    2.21
   0  -1  10   73.08    2.50
   0  -1  10   72.24    2.45
   0   1 -10   75.61    2.54
   0   1 -10   73.73    2.50
   0  -1  10   72.80    2.64
   0  -1  10   75.32    2.65
   0   1 -10   73.80    2.69
   0   1 -10   75.18    2.67
   0  -1   9 3867.04  106.24
   0  -1   9 3662.01  100.64
   0   1  -9 3840.02  105.54
   0   1  -9 3719.23  102.20
   0  -1   9 3770.09  101.88
   0  -1   9 3882.94  104.84
   0   1  -9 3751.02  101.40
   0   1  -9 3739.89  101.01
   0  -1   8  225.54    6.58
   0  -1   8  230.62    6.69
   0   1  -8  226.33    6.58
   0   1  -8  236.35    6.85
   0  -1   8  238.57    7.01
   0  -1   8  230.78    6.74
   0   1  -8  247.95    7.28
   0   1  -8  234.44    6.85
   0  -1   7   35.01    1.30
   0  -1   7   33.49    1.27
   0   1  -7   35.13    1.32
   0   1  -7   32.81    1.24
   0  -1   7   32.17    1.41
   0  -1   7   32.68    1.38
   0   1  -7   34.62    1.49
   0   1  -7   31.65    1.37
   0  -1   6  186.76    5.40
   0  -1   6  192.32    5.56
   0   1  -6  192.00    5.55
   0   1  -6  181.19    5.26
   0  -1   6  183.90    5.44
   0  -1   6  187.55    5.47
   0   1  -6  195.97    5.77
   0   1  -6  189.93    5.55
   0  -1   5   19.84    0.79
   0  -1   5   17.58    0.75
   0   1  -5   19.10    0.76
   0   1  -5   18.02    0.75
   0  -1   5   17.71    0.91
   0  -1   5   18.58    0.87
   0   1  -5   19.17    0.95
   0   1  -5   18.66    0.89
   0  -1   4    0.35    0.19
   0  -1   4    0.19    0.19
   0   1  -4    0.40    0.17
   0   1  -4   -0.02    0.17
   0  -1   4    0.56    0.33
   0  -1   4    0.29    0.30
   0   1  -4   -0.48    0.33
   0   1  -4    0.49    0.32
   0  -1   3 5254.60  143.98
   0  -1   3 5872.88  158.00
   0   1  -3 5566.13  149.85
   0  -1   2    0.60    0.13
   0  -1   2    0.78    0.14
   0   1  -2    0.59    0.13
   0   1  -2    0.76    0.11
   0  -1   2    0.97    0.27
   0  -1   2    0.60    0.19
   0   1  -2    1.26    0.29
   0   1  -2    1.02    0.24
   0  -1   1    4.40    0.22
   0  -1   1    4.72    0.24
   0   1  -1    4.18    0.21
   0   1  -1    4.43    0.24
   0  -1   1    4.45    0.35
   0  -1   1    4.63    0.30
   0   1  -1    4.82    0.35
   0   1  -1    4.99    0.33
   0  -1   0  105.19    2.97
   0  -1   0  106.76    3.05
   0   1   0  106.05    3.00
   0   1   0  102.07    2.92
   0  -1   0  106.78    3.10
   0  -1   0  103.15    2.94
   0   1   0  101.44    2.96
   0   1   0   98.59    2.81
   0  -1  -1   11.13    0.43
   0  -1  -1   10.35    0.43
   0   1   1   11.11    0.41
   0   1   1   11.75    0.48
   0  -1  -1   11.27    0.52
   0  -1  -1   10.54    0.43
   0   1   1   10.57    0.49
   0   1   1   10.44    0.43
   0  -1  -2   10.11    0.43
   0  -1  -2   10.55    0.48
   0   1   2   10.11    0.43
   0   1   2   10.25    0.46
   0  -1  -2   10.03    0.49
   0  -1  -2    9.66    0.41
   0   1   2    9.54    0.49
   0   1   2   10.19    0.43
   0  -1  -3 3326.64   91.23
   0  -1  -3 3369.56   92.42
   0   1   3 3356.84   92.12
   0   1   3 3423.60   93.92
   0  -1  -3 3429.95   92.33
   0  -1  -3 3272.60   88.16
   0   1   3 3325.05   89.50
   0   1   3 3307.57   89.04
   0  -1  -4    0.03    0.22
   0  -1  -4    0.08    0.19
   0   1   4    0.14    0.25
   0   1   4    0.40    0.21
   0  -1  -4   -0.19    0.19
   0  -1  -4    0.10    0.30
   0   1   4   -0.19    0.22
   0   1   4    0.27    0.29
   0  -1  -5    1.94    0.35
   0  -1  -5    1.72    0.29
   0   1   5    2.21    0.37
   0   1   5    2.57    0.32
   0  -1  -5    1.81    0.30
   0  -1  -5    2.48    0.40
   0   1   5    2.08    0.32
   0   1   5    2.16    0.38
   0  -1  -6    0.46    0.37
   0  -1  -6    0.89    0.32
   0   1   6    0.56    0.38
   0   1   6    1.08    0.33
   0  -1  -6    1.02    0.33
   0  -1  -6    0.76    0.43
   0   1   6    1.61    0.35
   0   1   6    0.65    0.38
   0  -1  -7    6.61    0.60
   0  -1  -7    6.17    0.52
   0   1   7    6.47    0.60
   0   1   7    6.96    0.56
   0  -1  -7    7.14    0.56
   0  -1  -7    6.34    0.64
   0   1   7    7.47    0.56
   0   1   7    6.63    0.59
   0  -1  -8   18.95    0.99
   0  -1  -8   17.63    0.89
   0   1   8   18.09    0.97
   0   1   8   19.14    0.94
   0  -1  -8   21.90    1.00
   0  -1  -8   19.33    1.00
   0   1   8   18.18    0.89
   0   1   8   20.84    1.00
   0  -1  -9  187.71    5.66
   0  -1  -9  204.88    6.09
   0   1   9  187.55    5.67
   0   1   9  195.02    5.82
   0  -1  -9  188.66    5.48
   0  -1  -9  186.44    5.52
   0   1   9  205.67    5.94
   0   1   9  202.17    5.86
   0  -1 -10   65.58    2.35
   0  -1 -10   65.52    2.30
   0   1  10   68.09    2.43
   0   1  10   64.63    2.29
   0  -1 -10   65.77    2.24
   0  -1 -10   62.02    2.23
   0   1  10   66.56    2.26
   0   1  10   60.73    2.13
   0  -1 -11    2.08    0.51
   0  -1 -11    1.02    0.43
   0   1  11    1.08    0.52
   0   1  11    1.29    0.41
   0  -1 -11    1.35    0.49
   0  -1 -11    1.18    0.59
   0   1  11    1.29    0.49
   0   1  11    1.49    0.51
   0  -1 -12    3.48    0.59
   0  -1 -12    5.13    0.62
   0   1  12    3.77    0.62
   0   1  12    4.77    0.59
   0  -1 -12    3.34    0.59
   0  -1 -12    4.77    0.73
   0   1  12    5.04    0.62
   0   1  12    3.16    0.59
   0  -1 -13   93.22    3.24
   0  -1 -13   97.96    3.31
   0   1  13   91.79    3.23
   0   1  13   91.61    3.13
   0  -1 -13   92.23    3.10
   0  -1 -13   88.48    3.10
   0   1  13   88.18    2.97
   0   1  13   88.63    2.99
   0  -1 -14  233.80    7.15
   0  -1 -14  236.98    7.17
   0   1  14  236.35    7.26
   0   1  14  239.05    7.23
   0  -1 -14  240.80    7.15
   0  -1 -14  228.24    6.91
   0   1  14  239.68    7.09
   0   1  14  242.39    7.17
   0  -1 -15   57.31    2.32
   0  -1 -15   56.03    2.23
   0   1  15   53.77    2.26
   0   1  15   55.72    2.21
   0  -1 -15   61.45    2.35
   0  -1 -15   55.68    2.30
   0   1  15   58.30    2.24
   0   1  15   57.03    2.21
   0  -1 -16  197.72    6.25
   0  -1 -16  199.95    6.23
   0   1  16  204.56    6.48
   0   1  16  196.45    6.14
   0  -1 -16  200.58    6.17
   0  -1 -16  193.27    6.10
   0   1  16  203.92    6.23
   0   1  16  202.65    6.17
   0  -1 -17   25.16    1.45
   0  -1 -17   24.13    1.38
   0   1  17   25.72    1.53
   0   1  17   30.44    1.53
   0  -1 -17   26.88    1.49
   0  -1 -17   26.32    1.59
   0   1  17   25.89    1.43
   0   1  17   25.64    1.41
   0  -1 -18  771.98   22.06
   0  -1 -18  762.60   21.74
   0   1  18  756.88   21.70
   0   1  18  774.68   22.05
   0  -1 -18  769.91   21.58
   0  -1 -18  801.54   22.57
   0   1  18  822.20   22.95
   0   1  18  797.25   22.28
   0  -1 -19  116.65    4.12
   0  -1 -19  122.64    4.24
   0   1  19  126.60    4.47
   0   1  19  112.47    3.91
   0  -1 -19  120.91    4.16
   0  -1 -19  114.72    4.13
   0  -1 -20   71.65    2.91
   0  -1 -20   77.34    3.02
   0   1  20   75.96    3.07
   0   1  20   81.43    3.08
   0  -1 -20   76.86    3.16
   0  -1 -20   78.68    3.07
   0   1  20   78.10    3.02
   0   1  20   78.53    3.02
   0  -1 -21  363.18   11.00
   0  -1 -21  365.09   11.00
   0   1  21  367.79   11.17
   0   1  21  358.57   10.78
   0  -1 -21  364.77   10.87
   0  -1 -21  364.45   11.03
   0   1  21  363.34   10.78
   0   1  21  363.66   10.74
   0  -1 -22    1.99    0.65
   0   1  22    0.79    0.62
   0  -1 -22    1.10    0.70
   0  -1 -22    0.70    0.76
   0   1  22    0.84    0.62
   0   1  22    1.00    0.64
   0   1  23   57.06    2.72
   0  -1 -23   44.61    2.91
   0   1  23   60.68    2.59
   0   1  23   57.22    2.54
   0  -1 -24   76.31    3.13
   0  -1 -24   87.82    3.43
   0   1  24   78.29    3.29
   0   1  24   76.47    3.05
   0  -1 -24   75.59    3.18
   0  -1 -24   74.54    3.35
   0   1  24   71.98    2.96
   0   1  24   75.42    3.08
   0  -1 -25   68.74    2.97
   0  -1 -25   70.16    2.96
   0   1  25   66.26    2.97
   0   1  25   68.31    2.88
   0  -1 -25   67.55    3.02
   0  -1 -25   70.19    3.29
   0   1  25   69.43    2.97
   0   1  25   72.67    3.02
   0  -1 -26   11.25    1.16
   0  -1 -26    9.60    1.05
   0   1  26    9.36    1.14
   0   1  26   12.45    1.19
   0  -1 -26   11.81    1.27
   0  -1 -26   11.51    1.40
   0   1  26   10.20    1.11
   0   1  26    9.77    1.11
   0  -1 -27   62.89    2.83
   0  -1 -27   62.42    2.80
   0   1  27   63.42    2.97
   0   1  27   63.69    2.80
   0  -1 -27   66.06    3.12
   0  -1 -27   63.31    3.18
   0  -1 -28   39.15    2.19
   0  -1 -28   40.75    2.19
   0   1  28   44.27    2.48
   0   1  28   38.00    2.07
   0  -1 -28   37.54    2.34
   0  -1 -28   38.54    2.50
   0   1  28   41.02    2.26
   0   1  28   35.76    2.15
   0  -1 -29   59.06    2.83
   0  -1 -29   59.79    2.78
   0  -1 -29   56.82    2.96
   0  -1 -29   52.99    2.97
   0   1  29   53.75    2.72
   0   1  29   61.48    2.85
   0  -1 -30   41.58    2.29
   0  -1 -30   44.63    2.35
   0   1  30   41.61    2.26
   0  -1 -30   43.33    2.61
   0  -1 -30   40.59    2.62
   0   1  30   38.21    2.27
   0   1  30   40.09    2.27
   0  -1 -31    5.23    0.99
   0  -1 -31    3.80    0.81
   0   1  31    4.39    0.95
   0   1  31    5.01    1.08
   0  -1 -31    3.12    0.97
   0  -1 -31    4.28    1.13
   0   1  31    3.53    0.91
   0   1  31    4.07    0.94
   0  -1 -32    1.19    0.72
   0  -1 -32    2.05    0.75
   0   1  32    2.30    0.84
   0   1  32    1.54    0.67
   0  -1 -32    1.75    0.89
   0  -1 -32    3.89    1.18
   0   1  32    1.22    0.79
   0   1  32    3.37    0.92
   0  -1 -33    0.37    0.62
   0  -1 -33    0.11    0.62
   0   1  33    1.38    0.67
   0   1  33    0.05    0.68
   0  -1 -33    0.02    0.87
   0  -1 -33    0.86    1.00
   0   1  33    1.46    0.81
   0   1  33   -0.60    1.10
   0  -1 -34  113.39    4.48
   0  -1 -34  112.20    4.53
   0   1  34   97.91    4.34
   0   1  34  104.25    4.18
   0  -1 -34  118.14    5.07
   0  -1 -34  105.84    4.91
   0   1  34  110.26    4.55
   0   1  34  106.46    4.32
   0  -1 -35   90.29    3.97
   0   1  35   83.86    3.64
   0   1  35   83.35    3.93
   0  -1 -35   77.44    3.99
   0  -1 -35   75.00    4.08
   0  -1 -36    8.44    1.22
   0   1  36    8.61    1.18
   0   1  36   10.01    1.38
   0  -1 -36   10.24    1.54
   0  -1 -36    8.42    1.67
   0   1  36    6.48    1.24
   0   1  36    9.82    1.32
   0  -1 -37    5.04    1.03
   0  -1 -37    2.99    0.91
   0   1  37    3.69    1.03
   0   1  37    4.78    0.94
   0  -1 -37    5.80    1.37
   0  -1 -37    4.64    1.41
   0   1  37    3.85    1.11
   0   1  37    2.53    1.00
   0  -1 -38    3.66    0.92
   0  -1 -38    4.50    0.95
   0   1  38    4.08    1.06
   0   1  38    3.54    0.92
   0  -1 -38    5.91    1.34
   0  -1 -38    3.70    1.46
   0   1  38    4.04    1.08
   0   1  38    2.62    0.97
   0  -1 -39    1.83    0.87
   0  -1 -39    0.81    0.78
   0   1  39    1.22    0.89
   0  -1 -39    0.99    1.11
   0  -1 -39    3.07    1.43
   0   1  39    1.00    0.89
   0   1  40    8.26    1.37
   0  -1 -40    9.82    1.92
   0  -1 -40    8.46    1.72
   0   1  40    9.62    1.46
   0  -1 -41    0.13    0.68
   0  -1 -41   -0.02    0.68
   0   1  41    0.32    0.73
   0   1  41    0.05    0.70
   0   1  41    0.32    0.83
   0  -1 -42    1.83    0.79
   0  -1 -42    0.65    0.72
   0   1  42    0.13    0.89
   0   1  42    3.12    0.89
   0  -1 -43    0.64    0.73
   0  -1 -43    0.99    0.75
   0   1  43    0.68    0.95
   0   1  43    0.76    0.73
   0   1  43    1.11    0.95
   0  -1 -44    2.18    0.86
   0  -1 -44    0.87    0.81
   0   1  44    1.24    0.87
   0   1  44    1.32    0.79
   0   1  44    1.72    1.00
   0  -1 -45   12.17    1.48
   0  -1 -45   10.46    1.45
   0  -1 -45   12.91    2.08
   0   1  45    8.92    1.57
   0  -1 -46   -0.87    0.75
   0  -1 -46    0.10    0.70
   0   1  46    0.24    0.72
   0   1  46    0.67    0.87
   0  -1 -46    0.14    1.38
   0  -1 -46    0.29    1.03
   0  -1 -47    1.13    0.87
   0  -1 -47    1.24    0.84
   0   1  47    1.51    0.95
   0   1  47    1.32    0.83
   0  -1 -48    2.24    0.94
   0  -1 -48    3.16    1.03
   0   1  48    2.13    1.08
   0   1  48    2.73    0.99
   0   1  49    0.99    0.95
   0   1  49    0.64    0.94
   0  -2  49    0.46    0.86
   0  -2  49   -0.29    0.83
   0   2 -49   -0.08    0.78
   0   2 -49    1.62    0.95
   0  -2  48   14.73    1.68
   0  -2  48   13.84    1.86
   0   2 -48   12.83    1.54
   0   2 -48   13.61    1.70
   0   2 -48   10.03    2.23
   0   2 -48   11.22    2.24
   0  -2  47   19.22    2.13
   0  -2  47   21.49    2.00
   0   2 -47   20.57    1.86
   0   2 -47   19.01    1.99
   0   2 -47   23.48    2.72
   0   2 -47   16.67    2.50
   0  -2  46    4.78    1.10
   0  -2  46    4.26    1.19
   0   2 -46    7.18    1.14
   0   2 -46    4.51    1.13
   0  -2  46    1.43    1.24
   0  -2  46    4.67    1.32
   0   2 -46    5.29    1.70
   0   2 -46    5.23    1.76
   0  -2  45   11.81    1.75
   0  -2  45   14.54    1.62
   0   2 -45   10.47    1.40
   0   2 -45    9.81    1.49
   0  -2  45   15.67    2.00
   0  -2  45   13.54    1.95
   0   2 -45   11.25    2.11
   0   2 -45    8.90    2.03
   0  -2  44   10.59    1.45
   0  -2  44    7.57    1.46
   0   2 -44   11.28    1.37
   0   2 -44   11.73    1.54
   0  -2  44   14.05    1.94
   0  -2  44    9.25    1.76
   0   2 -44   10.78    2.08
   0   2 -44   12.84    2.19
   0  -2  43    1.41    0.99
   0  -2  43    1.76    0.84
   0   2 -43    2.10    0.81
   0   2 -43    1.18    0.84
   0  -2  43    4.35    1.26
   0  -2  43    2.35    1.19
   0   2 -43    2.23    1.41
   0   2 -43    2.05    1.40
   0  -2  42   71.97    4.08
   0  -2  42   66.93    3.94
   0   2 -42   64.48    4.45
   0   2 -42   65.32    4.35
   0  -2  41   20.52    2.13
   0  -2  41   18.04    2.07
   0   2 -41   20.44    2.50
   0   2 -41   19.36    2.42
   0  -2  40   -0.25    0.81
   0  -2  40   -0.43    0.81
   0   2 -40   -0.25    0.62
   0   2 -40   -0.17    0.76
   0  -2  40   -0.19    0.99
   0  -2  40   -0.32    0.89
   0   2 -40    0.79    1.18
   0   2 -40    1.45    1.26
   0  -2  39   12.54    1.49
   0  -2  39   12.56    1.62
   0   2 -39   11.22    1.34
   0   2 -39   12.24    1.49
   0  -2  39   11.84    1.67
   0  -2  39   13.70    1.78
   0   2 -39   13.22    1.97
   0   2 -39   15.85    2.19
   0  -2  38   28.45    2.26
   0  -2  38   27.50    2.02
   0   2 -38   25.65    1.91
   0   2 -38   25.73    2.08
   0  -2  38   26.91    2.34
   0  -2  38   26.81    2.27
   0   2 -38   27.78    2.62
   0   2 -38   25.86    2.65
   0  -2  37   35.51    2.29
   0  -2  37   38.00    2.65
   0   2 -37   40.56    2.38
   0   2 -37   38.38    2.48
   0  -2  37   31.63    2.45
   0  -2  37   36.14    2.69
   0   2 -37   29.80    2.81
   0   2 -37   27.35    2.65
   0  -2  36    5.25    1.13
   0  -2  36    5.99    1.03
   0   2 -36    4.05    0.94
   0   2 -36    7.49    1.18
   0  -2  36    4.43    1.18
   0  -2  36    7.06    1.26
   0   2 -36    3.37    1.30
   0   2 -36    6.02    1.51
   0  -2  35    5.07    1.00
   0  -2  35    4.02    1.03
   0   2 -35    5.21    0.95
   0   2 -35    5.15    1.02
   0  -2  35    4.85    1.19
   0  -2  35    5.10    1.19
   0   2 -35    3.94    1.32
   0   2 -35    4.97    1.37
   0  -2  34    9.55    1.34
   0  -2  34   10.11    1.24
   0   2 -34   10.30    1.22
   0   2 -34    8.15    1.21
   0  -2  34    7.95    1.32
   0   2 -34    8.14    1.65
   0  -2  33   21.58    1.81
   0  -2  33   20.82    1.70
   0   2 -33   17.63    1.73
   0  -2  32    0.91    0.73
   0  -2  32    1.32    0.67
   0   2 -32    1.29    0.67
   0   2 -32    0.16    0.65
   0  -2  32    0.94    1.13
   0  -2  31   82.74    3.50
   0  -2  31   85.14    3.74
   0   2 -31   79.33    3.37
   0   2 -31   86.64    3.66
   0  -2  31   76.93    3.85
   0  -2  30    0.64    0.68
   0  -2  30    0.94    0.67
   0   2 -30    0.76    0.57
   0   2 -30    0.22    0.60
   0  -2  30    0.59    0.81
   0  -2  30   -0.59    0.84
   0   2 -30    0.29    0.94
   0   2 -30    0.87    0.99
   0  -2  29    8.58    1.06
   0  -2  29    8.30    1.14
   0   2 -29    7.47    0.99
   0   2 -29    6.55    0.95
   0  -2  29    5.90    1.08
   0  -2  29    8.79    1.30
   0   2 -29    8.58    1.41
   0   2 -29    5.90    1.24
   0   2 -28    9.23    1.10
   0   2 -28    8.95    1.05
   0  -2  28    8.65    1.19
   0  -2  28    7.25    1.18
   0   2 -28    8.28    1.37
   0   2 -28    6.66    1.32
   0  -2  27  244.77    8.06
   0  -2  27  236.66    7.66
   0   2 -27  243.34    7.79
   0   2 -27  249.70    8.04
   0  -2  27  246.84    8.14
   0  -2  27  239.52    8.03
   0   2 -27  244.77    8.38
   0   2 -27  226.49    7.90
   0  -2  26  207.42    6.96
   0  -2  26  192.48    6.39
   0   2 -26  204.40    6.74
   0   2 -26  202.33    6.63
   0  -2  26  205.35    6.95
   0  -2  26  196.93    6.85
   0   2 -26  219.50    7.66
   0   2 -26  203.76    7.20
   0  -2  25   12.38    1.30
   0  -2  25   14.15    1.27
   0   2 -25   14.32    1.22
   0   2 -25   15.18    1.29
   0  -2  25   15.88    1.48
   0  -2  25   14.43    1.48
   0   2 -25   14.27    1.61
   0   2 -25   16.36    1.78
   0  -2  24   67.47    3.04
   0  -2  24   66.82    3.12
   0   2 -24   62.72    3.16
   0   2 -24   59.41    3.02
   0  -2  23   77.42    3.18
   0   2 -23   78.69    3.16
   0  -2  23   78.77    3.35
   0  -2  23   74.02    3.31
   0  -2  22    1.56    0.59
   0  -2  22    0.95    0.54
   0   2 -22    2.07    0.62
   0   2 -22    1.41    0.56
   0  -2  22    0.70    0.72
   0  -2  22    1.56    0.83
   0   2 -22    1.38    0.83
   0   2 -22    1.56    0.87
   0  -2  21   76.53    2.96
   0  -2  21   74.37    2.99
   0   2 -21   75.53    2.97
   0   2 -21   79.85    3.05
   0  -2  21   76.43    3.23
   0   2 -21   73.56    3.26
   0   2 -21   72.56    3.27
   0  -2  20  113.02    4.04
   0  -2  20  115.23    3.99
   0   2 -20  111.00    3.88
   0   2 -20  117.39    4.10
   0  -2  20  110.19    4.12
   0  -2  20  113.79    4.28
   0   2 -20  106.28    4.18
   0   2 -20  116.79    4.43
   0  -2  19   10.32    0.94
   0  -2  19    9.79    0.99
   0   2 -19    9.89    0.94
   0   2 -19    9.98    0.95
   0  -2  19    8.92    1.05
   0  -2  19   11.33    1.24
   0   2 -19    7.77    1.08
   0   2 -19   11.78    1.32
   0  -2  18 1015.48   28.63
   0  -2  18 1041.54   29.40
   0   2 -18 1018.02   28.70
   0   2 -18 1005.46   28.34
   0  -2  18 1058.87   29.56
   0  -2  18 1013.73   28.43
   0   2 -18 1008.64   28.40
   0   2 -18  996.09   27.96
   0  -2  17  226.49    6.96
   0  -2  17  249.54    7.68
   0   2 -17  246.84    7.55
   0   2 -17  233.48    7.15
   0  -2  17  247.63    7.71
   0  -2  17  238.25    7.55
   0   2 -17  236.19    7.47
   0   2 -17  237.94    7.61
   0  -2  16   17.28    1.10
   0  -2  16   18.04    1.16
   0   2 -16   18.72    1.14
   0   2 -16   19.96    1.18
   0  -2  16   19.23    1.37
   0  -2  16   15.24    1.29
   0   2 -16   17.71    1.40
   0   2 -16   18.01    1.38
   0  -2  15  391.63   11.41
   0  -2  15  368.90   10.82
   0   2 -15  386.39   11.25
   0   2 -15  372.40   10.89
   0  -2  15  377.49   11.13
   0  -2  15  362.55   10.81
   0   2 -15  380.66   11.27
   0   2 -15  379.23   11.32
   0  -2  14   20.46    1.16
   0  -2  14   20.03    1.13
   0   2 -14   20.85    1.14
   0   2 -14   19.53    1.11
   0  -2  14   18.60    1.32
   0  -2  14   19.31    1.40
   0   2 -14   20.57    1.43
   0   2 -14   18.93    1.34
   0  -2  13   17.93    1.05
   0  -2  13   17.87    1.03
   0   2 -13   18.04    1.03
   0   2 -13   17.61    1.00
   0  -2  13   18.95    1.29
   0  -2  13   18.06    1.32
   0   2 -13   18.10    1.37
   0   2 -13   17.58    1.24
   0  -2  12 1382.15   38.40
   0  -2  12 1400.91   38.92
   0   2 -12 1395.98   38.80
   0   2 -12 1409.97   39.13
   0  -2  12 1412.67   38.80
   0  -2  12 1451.77   39.94
   0   2 -12 1419.35   39.00
   0   2 -12 1423.80   39.24
   0  -2  11  717.46   20.17
   0  -2  11  723.50   20.34
   0   2 -11  724.61   20.36
   0   2 -11  732.88   20.57
   0  -2  11  723.34   20.22
   0  -2  11  715.08   20.11
   0   2 -11  724.93   20.41
   0   2 -11  716.35   20.09
   0  -2  10    9.03    0.70
   0  -2  10    8.42    0.67
   0   2 -10    9.28    0.68
   0   2 -10    8.73    0.70
   0  -2  10    6.98    0.91
   0  -2  10    7.98    0.84
   0   2 -10    6.18    0.83
   0   2 -10    8.15    0.94
   0  -2   9 3482.40   95.75
   0  -2   9 3577.77   98.32
   0   2  -9 3757.37  103.26
   0   2  -9 3493.53   96.02
   0  -2   9 3406.11   92.19
   0  -2   9 3474.46   94.14
   0   2  -9 3511.01   95.05
   0   2  -9 3612.74   97.84
   0  -2   8   25.46    1.11
   0  -2   8   27.04    1.14
   0   2  -8   26.03    1.13
   0   2  -8   27.50    1.14
   0  -2   8   27.23    1.48
   0  -2   8   27.50    1.40
   0   2  -8   26.83    1.38
   0   2  -8   30.68    1.57
   0  -2   7   23.84    1.02
   0  -2   7   21.11    0.97
   0   2  -7   21.63    0.94
   0   2  -7   21.47    0.97
   0  -2   7   21.46    1.18
   0  -2   7   21.09    1.26
   0   2  -7   20.11    1.24
   0   2  -7   21.46    1.19
   0  -2   6   17.47    0.79
   0  -2   6   16.05    0.78
   0   2  -6   16.34    0.76
   0   2  -6   16.78    0.79
   0  -2   6   17.26    1.11
   0  -2   6   17.75    1.03
   0   2  -6   18.36    1.06
   0   2  -6   15.69    1.08
   0  -2   5    0.11    0.25
   0  -2   5    0.56    0.30
   0   2  -5    0.25    0.25
   0   2  -5    0.03    0.29
   0  -2   5    0.86    0.45
   0  -2   5    0.45    0.51
   0   2  -5    0.43    0.46
   0   2  -5   -0.03    0.52
   0  -2   4    3.99    0.33
   0  -2   4    3.74    0.37
   0   2  -4    3.56    0.32
   0   2  -4    3.34    0.35
   0  -2   4    3.89    0.60
   0  -2   4    3.89    0.51
   0   2  -4    3.39    0.52
   0   2  -4    3.74    0.60
   0   2  -3  374.62   10.49
   0   2  -3  377.96   10.55
   0  -2   3  381.46   10.70
   0  -2   3  384.32   10.87
   0   2  -3  391.95   11.08
   0   2  -3  384.96   10.78
   0  -2   2   29.26    0.99
   0  -2   2   27.59    0.99
   0   2  -2   28.13    1.00
   0   2  -2   29.10    0.99
   0  -2   2   28.93    1.27
   0  -2   2   27.35    1.13
   0   2  -2   29.53    1.19
   0   2  -2   29.26    1.29
   0  -2   1    9.55    0.49
   0  -2   1    9.52    0.45
   0   2  -1    9.93    0.46
   0   2  -1   10.16    0.51
   0  -2   1    8.26    0.57
   0  -2   1   10.17    0.72
   0   2  -1    9.74    0.60
   0   2  -1    9.44    0.70
   0  -2   0 1829.41   50.26
   0  -2   0 1905.71   52.42
   0   2   0 1886.63   51.88
   0   2   0 1877.10   51.58
   0  -2   0 1870.74   50.69
   0  -2   0 1831.00   49.54
   0   2   0 1848.49   49.97
   0   2   0 1885.04   51.07
   0  -2  -1   31.98    1.10
   0  -2  -1   31.07    1.13
   0   2   1   31.45    1.08
   0   2   1   31.28    1.13
   0  -2  -1   32.25    1.19
   0  -2  -1   30.29    1.26
   0   2   1   33.85    1.24
   0   2   1   31.84    1.30
   0  -2  -2    3.75    0.33
   0  -2  -2    4.72    0.40
   0   2   2    4.20    0.33
   0   2   2    3.91    0.38
   0  -2  -2    3.50    0.51
   0  -2  -2    3.89    0.40
   0   2   2    4.23    0.40
   0   2   2    4.32    0.54
   0  -2  -3   53.12    1.73
   0  -2  -3   58.94    1.95
   0   2   3   57.74    1.86
   0   2   3   60.52    1.99
   0  -2  -3   59.03    1.89
   0  -2  -3   60.64    2.07
   0   2   3   60.24    1.91
   0   2   3   61.16    2.08
   0  -2  -4   39.89    1.46
   0  -2  -4   38.00    1.35
   0   2   4   39.45    1.46
   0   2   4   40.70    1.43
   0  -2  -4   41.69    1.57
   0  -2  -4   37.00    1.37
   0   2   4   39.21    1.37
   0   2   4   41.32    1.56
   0  -2  -5   14.10    0.73
   0  -2  -5   12.81    0.76
   0   2   5   13.14    0.70
   0   2   5   13.67    0.78
   0  -2  -5   11.44    0.81
   0  -2  -5   12.14    0.67
   0   2   5   12.99    0.83
   0   2   5   12.52    0.67
   0  -2  -6 1193.17   33.11
   0  -2  -6 1157.41   32.06
   0   2   6 1196.19   33.19
   0   2   6 1177.76   32.63
   0  -2  -6 1157.25   31.42
   0  -2  -6 1195.40   32.57
   0   2   6 1159.95   31.60
   0   2   6 1180.14   32.03
   0  -2  -7   19.04    0.94
   0  -2  -7   19.60    1.03
   0   2   7   20.81    1.00
   0   2   7   19.76    1.05
   0  -2  -7   19.93    1.06
   0  -2  -7   21.87    0.97
   0  -2  -8   29.40    1.34
   0  -2  -8   28.07    1.22
   0   2   8   28.69    1.26
   0   2   8   26.30    1.27
   0  -2  -8   30.52    1.22
   0  -2  -8   27.39    1.29
   0   2   8   29.63    1.30
   0   2   8   28.91    1.18
   0  -2  -9   12.27    0.79
   0  -2  -9   12.60    0.87
   0   2   9   11.73    0.79
   0   2   9   11.78    0.86
   0  -2  -9   11.11    0.87
   0  -2  -9   10.73    0.72
   0   2   9   10.79    0.81
   0   2   9   11.11    0.72
   0  -2 -10   19.18    1.03
   0  -2 -10   21.77    1.19
   0   2  10   18.50    1.11
   0   2  10   21.25    1.10
   0  -2 -10   22.70    1.08
   0  -2 -10   21.27    1.19
   0   2  10   21.09    1.10
   0   2  10   23.24    1.08
   0  -2 -11    4.26    0.56
   0  -2 -11    3.72    0.62
   0   2  11    3.43    0.62
   0   2  11    4.02    0.57
   0  -2 -11    2.89    0.68
   0  -2 -11    4.26    0.57
   0   2  11    4.04    0.64
   0   2  11    3.72    0.54
   0  -2 -12   43.39    1.86
   0  -2 -12   43.15    1.76
   0   2  12   45.08    1.94
   0   2  12   45.14    1.84
   0  -2 -12   42.41    1.68
   0  -2 -12   43.36    1.88
   0   2  12   44.90    1.81
   0   2  12   45.25    1.75
   0  -2 -13   38.50    1.76
   0  -2 -13   36.64    1.62
   0   2  13   38.53    1.80
   0   2  13   38.59    1.67
   0  -2 -13   39.72    1.81
   0  -2 -13   34.33    1.49
   0   2  13   37.49    1.62
   0   2  13   35.78    1.53
   0  -2 -14    1.29    0.46
   0  -2 -14    1.32    0.56
   0   2  14    1.06    0.56
   0   2  14    1.64    0.48
   0  -2 -14    1.57    0.52
   0  -2 -14    1.13    0.68
   0   2  14    1.80    0.59
   0   2  14    2.45    0.52
   0  -2 -15    4.63    0.73
   0  -2 -15    4.94    0.65
   0   2  15    4.24    0.73
   0   2  15    4.45    0.64
   0  -2 -15    5.50    0.84
   0  -2 -15    4.80    0.67
   0   2  15    5.18    0.72
   0   2  15    5.50    0.68
   0  -2 -16   -0.51    0.48
   0  -2 -16   -0.60    0.40
   0   2  16    1.49    0.49
   0   2  16    0.46    0.54
   0  -2 -16    0.08    0.49
   0  -2 -16    0.05    0.65
   0   2  16    0.11    0.52
   0   2  16   -0.17    0.48
   0  -2 -17   38.85    1.89
   0  -2 -17   36.68    1.75
   0   2  17   35.73    1.84
   0   2  17   37.80    1.78
   0  -2 -17   37.70    1.92
   0  -2 -17   33.76    1.62
   0   2  17   34.19    1.65
   0   2  17   35.60    1.65
   0  -2 -18  113.13    4.04
   0  -2 -18  110.85    3.89
   0   2  18  112.42    3.93
   0   2  18  119.57    4.26
   0  -2 -18  110.27    3.78
   0  -2 -18  113.01    4.05
   0  -2 -19   22.01    1.37
   0  -2 -19   22.84    1.48
   0   2  19   24.97    1.45
   0   2  19   23.71    1.54
   0  -2 -19   21.62    1.35
   0  -2 -19   24.25    1.62
   0   2  19   19.50    1.26
   0   2  19   22.62    1.34
   0  -2 -20   12.62    1.14
   0  -2 -20   12.94    1.06
   0   2  20   15.64    1.16
   0   2  20   14.59    1.26
   0  -2 -20   12.32    1.26
   0  -2 -20   13.80    1.13
   0   2  20   14.15    1.11
   0   2  20   13.51    1.08
   0  -2 -21    6.64    0.86
   0   2  21    6.31    0.92
   0  -2 -21    6.41    0.87
   0  -2 -21    6.36    1.02
   0   2  21    5.56    0.83
   0   2  21    6.79    0.84
   0  -2 -22   11.62    1.22
   0  -2 -22   13.14    1.35
   0  -2 -23   10.71    1.11
   0  -2 -23    9.01    1.00
   0  -2 -23   10.24    1.08
   0  -2 -23   11.92    1.35
   0   2  23   10.27    1.03
   0   2  23    9.71    1.03
   0  -2 -24    7.87    1.00
   0  -2 -24    9.52    1.02
   0   2  24    7.80    1.03
   0   2  24    6.91    0.87
   0  -2 -24    7.34    0.99
   0  -2 -24    8.79    1.19
   0   2  24    9.58    1.02
   0   2  24    7.33    0.97
   0  -2 -25   30.71    1.86
   0  -2 -25   26.83    1.72
   0   2  25   30.95    1.76
   0   2  25   30.15    1.92
   0  -2 -25   29.05    1.81
   0  -2 -25   24.22    1.88
   0   2  25   31.33    1.81
   0   2  25   27.61    1.72
   0  -2 -26   13.24    1.21
   0  -2 -26   14.35    1.32
   0   2  26   14.18    1.24
   0   2  26   14.65    1.40
   0  -2 -26   15.59    1.35
   0  -2 -26   12.92    1.43
   0   2  26   12.92    1.22
   0   2  26   15.12    1.30
   0  -2 -27   -0.08    0.60
   0  -2 -27   -0.14    0.54
   0   2  27    0.03    0.62
   0   2  27    0.35    0.51
   0  -2 -27    0.87    0.68
   0  -2 -27   -0.05    0.86
   0   2  27    0.41    0.60
   0   2  27    0.60    0.68
   0  -2 -28    6.20    0.95
   0  -2 -28    8.87    1.10
   0   2  28    7.07    1.08
   0   2  28    9.12    1.03
   0  -2 -28    7.76    1.06
   0  -2 -28   10.95    1.40
   0   2  28    7.90    1.06
   0   2  28    9.43    1.13
   0  -2 -29   31.39    2.02
   0  -2 -29   31.53    1.94
   0   2  29   29.50    1.80
   0   2  29   28.34    2.00
   0  -2 -29   25.75    1.88
   0  -2 -29   25.05    2.02
   0   2  29   31.38    1.92
   0   2  29   28.72    1.83
   0  -2 -30   21.87    1.67
   0  -2 -30   19.72    1.62
   0   2  30   18.56    1.48
   0   2  30   22.28    1.83
   0  -2 -30   19.96    1.73
   0  -2 -30   25.29    2.11
   0   2  30   21.28    1.61
   0   2  30   21.25    1.64
   0  -2 -31  168.80    5.98
   0  -2 -31  172.61    6.09
   0   2  31  169.27    6.04
   0  -2 -31  176.74    6.36
   0  -2 -31  168.00    6.44
   0   2  31  169.75    5.91
   0   2  31  170.70    5.91
   0   2  32  106.22    4.21
   0   2  32  116.38    4.74
   0  -2 -32  105.90    4.45
   0  -2 -32  113.83    4.97
   0   2  32  105.60    4.16
   0   2  32  102.14    4.08
   0  -2 -33   48.14    2.56
   0  -2 -33   41.50    2.40
   0   2  33   41.44    2.54
   0   2  33   46.41    2.46
   0  -2 -33   41.91    2.62
   0  -2 -33   46.36    3.02
   0   2  33   40.40    2.38
   0   2  33   42.17    2.40
   0  -2 -34   78.95    3.51
   0  -2 -34   71.89    3.35
   0   2  34   69.78    3.23
   0   2  34   74.54    3.67
   0  -2 -34   71.48    3.59
   0  -2 -34   70.05    3.93
   0   2  34   71.05    3.32
   0   2  34   74.05    3.35
   0  -2 -35  103.06    4.29
   0  -2 -35  107.67    4.42
   0   2  35   97.08    4.04
   0   2  35  101.34    4.48
   0  -2 -35  100.31    4.56
   0  -2 -35  101.96    4.97
   0  -2 -36   67.50    3.51
   0   2  36   70.12    3.27
   0   2  36   68.92    3.59
   0  -2 -36   76.48    3.86
   0  -2 -36   75.75    4.13
   0   2  36   71.81    3.37
   0   2  36   68.60    3.42
   0  -2 -37   32.15    2.19
   0  -2 -37   33.41    2.34
   0   2  37   33.17    2.48
   0   2  37   31.63    2.10
   0  -2 -37   32.82    2.53
   0  -2 -37   31.63    2.70
   0   2  37   35.00    2.35
   0   2  37   30.88    2.18
   0  -2 -38   38.43    2.38
   0  -2 -38   35.84    2.45
   0   2  38   40.16    2.69
   0   2  38   33.49    2.24
   0  -2 -38   38.00    2.80
   0  -2 -38   39.39    3.10
   0   2  38   38.23    2.45
   0   2  38   37.86    2.45
   0  -2 -39    2.73    1.14
   0  -2 -39    2.78    1.41
   0   2  39    2.53    0.92
   0   2  39    0.99    0.84
   0  -2 -40    7.98    1.30
   0  -2 -40   10.84    1.37
   0   2  40    8.73    1.26
   0   2  40    9.46    1.75
   0   2  40   10.17    1.41
   0   2  40   12.14    1.54
   0  -2 -41   19.45    1.81
   0  -2 -41   16.55    1.64
   0   2  41   17.44    1.91
   0   2  41   17.88    1.64
   0  -2 -41   12.76    1.83
   0  -2 -41   16.63    2.18
   0   2  41   21.22    1.94
   0   2  41   18.12    1.88
   0  -2 -42   -0.33    0.72
   0  -2 -42    0.57    0.75
   0   2  42    0.37    0.84
   0   2  42    1.22    0.70
   0  -2 -42   -0.05    0.92
   0  -2 -42   -0.10    1.27
   0   2  42    1.13    0.99
   0   2  42    1.57    2.62
   0  -2 -43    1.40    0.89
   0  -2 -43    1.67    0.79
   0   2  43   -0.22    0.65
   0   2  43    2.18    0.95
   0  -2 -43   -0.19    1.00
   0  -2 -43   -1.16    1.27
   0   2  43    0.79    0.89
   0   2  43    1.19    6.74
   0  -2 -44    1.10    0.86
   0  -2 -44    0.45    0.79
   0   2  44    1.56    0.83
   0   2  44    1.78    0.84
   0  -2 -44    0.52    1.02
   0  -2 -44    2.77    1.38
   0   2  44    0.62    0.94
   0  -2 -45    6.18    1.22
   0  -2 -45    6.07    1.13
   0   2  45    6.96    1.18
   0   2  45    5.55    1.27
   0  -2 -45    6.31    1.64
   0  -2 -45    5.12    1.35
   0  -2 -46    0.89    0.78
   0  -2 -46    2.43    0.87
   0   2  46    2.59    0.95
   0   2  46    0.92    0.78
   0  -2 -46    1.78    1.21
   0  -2 -46    2.43    1.16
   0  -2 -47    9.98    1.51
   0  -2 -47   11.98    1.48
   0   2  47   11.62    1.45
   0   2  47   12.54    1.78
   0  -2 -48    1.78    0.91
   0  -2 -48    1.41    0.94
   0   2  48    3.50    1.00
   0   2  48    1.67    1.00
   0  -3  49    2.78    1.03
   0  -3  49    2.37    1.03
   0   3 -49    1.38    0.95
   0   3 -49    3.02    1.02
   0  -3  48    2.42    0.91
   0  -3  48    2.37    1.11
   0   3 -48    3.07    1.06
   0   3 -48    5.29    1.08
   0   3 -48    3.16    1.51
   0   3 -48    4.61    1.67
   0  -3  47    1.99    0.99
   0  -3  47    2.61    1.03
   0   3 -47    3.32    1.10
   0   3 -47    3.75    1.00
   0   3 -47    0.91    1.29
   0   3 -47    0.92    1.34
   0  -3  46   -0.05    0.78
   0  -3  46    0.40    0.78
   0   3 -46    0.51    0.70
   0   3 -46   -0.03    0.70
   0  -3  46   -0.13    1.11
   0  -3  46    0.48    1.00
   0   3 -46    0.54    1.46
   0   3 -46    0.40    1.40
   0  -3  45    7.50    1.40
   0  -3  45    8.38    1.32
   0   3 -45    7.76    1.34
   0   3 -45    8.50    1.27
   0   3 -45    8.09    1.97
   0   3 -45    9.19    1.97
   0  -3  44   11.40    1.46
   0  -3  44    9.62    1.51
   0   3 -44    7.66    1.24
   0   3 -44    9.30    1.45
   0  -3  44   12.54    1.88
   0  -3  44    7.25    1.62
   0   3 -44   11.51    2.11
   0   3 -44   16.21    2.19
   0  -3  43    1.02    0.78
   0  -3  43    1.02    0.86
   0   3 -43   -0.11    0.68
   0   3 -43   -0.22    0.76
   0  -3  43    1.41    1.05
   0  -3  43   -0.27    0.89
   0   3 -43   -0.48    1.27
   0   3 -43    1.86    1.34
   0  -3  42    0.29    0.75
   0  -3  42    3.34    1.00
   0   3 -42    2.26    0.84
   0   3 -42    0.81    0.81
   0  -3  42    1.48    1.06
   0  -3  42    0.81    1.11
   0   3 -42    0.49    1.34
   0   3 -42   -1.35    1.26
   0  -3  41   26.05    2.46
   0  -3  41   20.55    2.23
   0   3 -41   18.83    2.46
   0   3 -41   22.00    2.61
   0  -3  40   16.94    1.91
   0  -3  40   18.82    1.81
   0   3 -40   20.60    1.92
   0   3 -40   20.55    1.76
   0  -3  40   19.28    2.21
   0  -3  40   15.58    1.95
   0   3 -40   19.98    2.46
   0   3 -40   15.16    2.29
   0  -3  39   56.69    3.24
   0  -3  39   52.31    2.91
   0   3 -39   54.50    3.02
   0   3 -39   54.44    2.86
   0  -3  39   54.01    3.53
   0  -3  39   49.84    3.23
   0   3 -39   54.33    3.88
   0   3 -39   54.23    3.78
   0  -3  38   14.65    1.72
   0  -3  38   15.97    1.59
   0   3 -38   13.99    1.43
   0   3 -38   15.16    1.61
   0  -3  38   18.41    2.02
   0  -3  38   17.44    1.91
   0   3 -38   13.13    2.07
   0   3 -38   18.17    2.19
   0  -3  37    2.51    0.81
   0  -3  37    3.00    0.91
   0   3 -37    2.15    0.79
   0   3 -37    1.26    0.78
   0  -3  37    0.35    1.03
   0  -3  37    3.34    1.08
   0   3 -37    4.39    1.40
   0   3 -37    3.00    1.30
   0  -3  36   11.27    1.48
   0  -3  36    8.22    1.19
   0   3 -36    7.84    1.18
   0   3 -36   10.44    1.26
   0  -3  36   10.01    1.57
   0  -3  36    7.07    1.34
   0   3 -36   10.06    1.78
   0   3 -36   11.98    1.83
   0  -3  35    0.92    0.84
   0  -3  35    1.00    0.76
   0   3 -35    1.54    0.72
   0   3 -35    2.13    0.75
   0  -3  35    0.22    0.89
   0  -3  35    0.59    0.87
   0   3 -35   -0.84    1.06
   0   3 -35    0.62    1.16
   0   3 -34   46.94    2.59
   0   3 -34   46.82    2.53
   0  -3  34   42.31    2.92
   0  -3  34   45.04    2.88
   0   3 -34   46.54    3.26
   0   3 -34   45.22    3.26
   0  -3  33    1.37    0.73
   0  -3  33    1.35    0.79
   0   3 -33    1.27    0.73
   0   3 -33    1.41    0.67
   0  -3  33    0.19    0.91
   0  -3  33    1.94    0.97
   0   3 -33    0.29    1.03
   0   3 -33    2.34    1.19
   0  -3  32   78.83    3.43
   0  -3  32   82.59    3.74
   0   3 -32   80.07    3.54
   0  -3  32   65.17    3.66
   0  -3  32   72.89    3.66
   0   3 -32   74.75    4.15
   0   3 -32   76.31    4.01
   0  -3  31   14.72    1.37
   0  -3  31   13.76    1.46
   0   3 -31    9.58    1.21
   0   3 -31    8.57    1.10
   0  -3  31   13.40    1.53
   0  -3  30    0.79    0.64
   0  -3  30   -0.51    0.65
   0   3 -30    0.00    0.54
   0   3 -30    0.08    0.60
   0  -3  29   56.81    2.70
   0  -3  29   50.15    2.65
   0   3 -29   56.84    2.70
   0   3 -29   52.37    2.50
   0  -3  29   51.27    3.10
   0  -3  28   10.92    1.18
   0  -3  28    8.69    1.14
   0   3 -28   10.06    1.06
   0   3 -28    9.25    1.08
   0  -3  28    8.47    1.49
   0  -3  28    9.03    1.40
   0   3 -28   11.38    1.59
   0   3 -28   10.62    1.53
   0   3 -27  208.69    6.90
   0   3 -27  196.29    6.48
   0  -3  27  188.35    6.79
   0  -3  27  203.76    7.04
   0   3 -27  191.68    7.03
   0   3 -27  188.66    7.06
   0  -3  26   20.17    1.54
   0  -3  26   21.74    1.51
   0   3 -26   19.03    1.41
   0   3 -26   20.85    1.51
   0  -3  26   21.44    1.84
   0  -3  26   19.17    1.65
   0  -3  25    2.00    0.64
   0  -3  25    2.42    0.73
   0   3 -25    2.89    0.68
   0   3 -25    2.37    0.67
   0  -3  25    1.81    0.78
   0  -3  25    2.19    0.86
   0   3 -25    2.08    1.02
   0   3 -25    4.28    1.08
   0  -3  24  147.75    5.55
   0  -3  24  149.18    5.42
   0  -3  23  109.43    4.04
   0   3 -23  109.22    4.04
   0  -3  23  113.98    4.55
   0  -3  23  118.16    4.50
   0   3 -23  116.19    4.61
   0   3 -23  108.84    4.58
   0  -3  22   36.08    1.91
   0  -3  22   37.81    1.89
   0   3 -22   35.84    1.88
   0   3 -22   37.11    1.84
   0   3 -22   39.83    2.48
   0   3 -22   36.62    2.26
   0  -3  21    8.76    0.92
   0  -3  21    5.86    0.81
   0   3 -21    5.94    0.81
   0   3 -21    5.80    0.78
   0  -3  21    6.64    1.05
   0  -3  21    6.26    1.11
   0   3 -21    8.69    1.19
   0   3 -21    6.14    1.13
   0  -3  20   58.59    2.43
   0  -3  20   61.70    2.59
   0   3 -20   52.72    2.30
   0   3 -20   56.73    2.35
   0  -3  20   61.00    2.80
   0  -3  20   58.20    2.81
   0   3 -20   52.48    2.67
   0   3 -20   50.48    2.69
   0  -3  19    2.03    0.54
   0  -3  19    2.24    0.60
   0   3 -19    2.16    0.59
   0   3 -19    2.05    0.56
   0  -3  19    2.19    0.73
   0  -3  19    0.30    0.73
   0   3 -19    4.83    1.02
   0   3 -19    2.21    0.84
   0  -3  18   23.70    1.35
   0  -3  18   21.43    1.35
   0   3 -18   22.79    1.35
   0   3 -18   21.81    1.29
   0  -3  18   21.35    1.65
   0  -3  18   25.35    1.67
   0   3 -18   21.84    1.62
   0   3 -18   23.40    1.78
   0  -3  17    5.69    0.72
   0  -3  17    5.74    0.73
   0   3 -17    6.45    0.76
   0   3 -17    6.60    0.73
   0  -3  17    7.68    1.00
   0  -3  17    5.72    1.00
   0   3 -17    5.63    0.97
   0   3 -17    5.90    1.06
   0  -3  16   38.97    1.75
   0  -3  16   42.09    1.86
   0   3 -16   40.07    1.80
   0   3 -16   40.36    1.76
   0  -3  16   44.28    2.27
   0  -3  16   38.38    2.00
   0   3 -16   39.78    2.23
   0   3 -16   38.81    2.08
   0  -3  15  434.07   12.60
   0  -3  15  439.63   12.76
   0   3 -15  438.04   12.72
   0   3 -15  428.98   12.41
   0  -3  15  414.36   12.22
   0  -3  15  436.45   12.95
   0   3 -15  419.61   12.45
   0   3 -15  413.09   12.40
   0  -3  14    2.69    0.54
   0  -3  14    3.16    0.54
   0   3 -14    2.99    0.54
   0   3 -14    2.57    0.51
   0  -3  14    2.70    0.76
   0  -3  14    3.88    0.86
   0   3 -14    3.53    0.81
   0   3 -14    1.88    0.81
   0  -3  13   11.14    0.84
   0  -3  13   12.29    0.86
   0   3 -13   12.56    0.89
   0   3 -13   10.89    0.81
   0  -3  13   11.90    1.11
   0  -3  13   11.84    1.21
   0   3 -13   12.60    1.24
   0   3 -13   10.94    1.11
   0  -3  12 1047.90   29.28
   0  -3  12  992.11   27.72
   0   3 -12  964.77   26.99
   0   3 -12 1020.24   28.48
   0  -3  12  988.62   27.69
   0  -3  12 1043.77   29.01
   0   3 -12  973.99   27.16
   0   3 -12  991.16   27.80
   0  -3  11  152.20    4.72
   0  -3  11  165.62    5.05
   0   3 -11  160.69    4.96
   0   3 -11  166.09    5.05
   0  -3  11  164.03    5.45
   0  -3  11  156.45    5.12
   0   3 -11  167.37    5.44
   0   3 -11  164.19    5.53
   0  -3  10  254.15    7.49
   0  -3  10  257.64    7.55
   0   3 -10  255.90    7.53
   0   3 -10  262.09    7.65
   0  -3  10  242.70    7.39
   0  -3  10  241.75    7.50
   0   3 -10  238.09    7.30
   0   3 -10  248.90    7.77
   0  -3   9  922.34   25.73
   0  -3   9  912.96   25.45
   0   3  -9  920.91   25.70
   0   3  -9  924.56   25.75
   0  -3   9  943.63   26.18
   0  -3   9  932.51   26.03
   0   3  -9  940.30   26.11
   0   3  -9  953.49   26.65
   0  -3   8  201.54    5.98
   0  -3   8  203.29    5.98
   0   3  -8  201.70    5.98
   0   3  -8  210.76    6.17
   0  -3   8  193.91    5.99
   0  -3   8  204.40    6.42
   0   3  -8  206.46    6.53
   0   3  -8  204.24    6.29
   0  -3   7  222.99    6.53
   0  -3   7  220.93    6.42
   0   3  -7  223.31    6.53
   0   3  -7  213.78    6.23
   0  -3   7  218.39    6.76
   0  -3   7  225.38    6.80
   0   3  -7  227.29    7.06
   0   3  -7  217.75    6.61
   0  -3   6  136.23    4.13
   0  -3   6  139.04    4.15
   0   3  -6  144.08    4.34
   0   3  -6  137.98    4.12
   0  -3   6  138.49    4.58
   0  -3   6  129.49    4.20
   0   3  -6  139.96    4.66
   0   3  -6  147.66    4.69
   0  -3   5  257.80    7.44
   0  -3   5  260.35    7.45
   0   3  -5  261.94    7.55
   0   3  -5  265.11    7.58
   0  -3   5  268.13    7.88
   0  -3   5  258.12    7.77
   0   3  -5  254.15    7.68
   0   3  -5  251.13    7.42
   0  -3   4    6.98    0.56
   0  -3   4    6.85    0.49
   0   3  -4    7.39    0.57
   0   3  -4    6.42    0.48
   0  -3   4    6.44    0.87
   0  -3   4    6.39    0.73
   0   3  -4    6.88    0.78
   0   3  -4    7.36    0.91
   0  -3   3 1627.56   44.89
   0  -3   3 1603.72   44.17
   0   3  -3 1550.63   42.77
   0   3  -3 1664.12   45.82
   0  -3   3 1602.13   43.79
   0  -3   3 1542.05   42.04
   0   3  -3 1660.94   45.43
   0   3  -3 1603.72   43.68
   0  -3   2    5.82    0.49
   0  -3   2    6.60    0.46
   0   3  -2    5.86    0.51
   0   3  -2    6.66    0.46
   0  -3   2    5.86    0.67
   0  -3   2    5.40    0.79
   0   3  -2    6.41    0.70
   0   3  -2    7.28    0.84
   0  -3   1    1.75    0.37
   0  -3   1    1.46    0.30
   0   3  -1    1.40    0.37
   0   3  -1    0.78    0.27
   0  -3   1    1.70    0.62
   0  -3   1    1.08    0.46
   0   3  -1    1.03    0.60
   0   3  -1    1.40    0.48
   0  -3   0  997.04   27.66
   0  -3   0  991.00   27.42
   0   3   0 1023.90   28.40
   0   3   0  978.92   27.08
   0  -3   0  968.43   26.53
   0  -3   0  988.14   27.23
   0   3   0  946.65   25.94
   0   3   0 1008.01   27.77
   0  -3  -1    1.64    0.38
   0  -3  -1    1.76    0.32
   0   3   1    1.05    0.38
   0   3   1    1.78    0.32
   0  -3  -1    2.38    0.64
   0  -3  -1    1.91    0.48
   0   3   1    2.05    0.49
   0   3   1    1.35    0.60
   0  -3  -2    7.52    0.60
   0  -3  -2    8.41    0.56
   0   3   2    9.58    0.67
   0   3   2    8.31    0.54
   0  -3  -2    9.46    0.89
   0  -3  -2    9.71    0.72
   0   3   2    9.52    0.70
   0   3   2    8.60    0.86
   0  -3  -3  874.97   24.40
   0  -3  -3  868.93   24.14
   0   3   3  860.99   24.00
   0   3   3  875.13   24.32
   0  -3  -3  902.79   24.91
   0  -3  -3  885.94   24.25
   0   3   3  872.91   24.11
   0   3   3  888.01   24.30
   0  -3  -4    3.66    0.54
   0  -3  -4    3.54    0.45
   0   3   4    3.27    0.52
   0   3   4    4.56    0.49
   0  -3  -4    3.99    0.72
   0  -3  -4    4.28    0.54
   0   3   4    4.77    0.57
   0   3   4    4.45    0.73
   0  -3  -5    2.46    0.52
   0  -3  -5    1.86    0.41
   0   3   5    1.68    0.51
   0   3   5    1.45    0.41
   0  -3  -5    0.68    0.62
   0  -3  -5    1.21    0.45
   0   3   5    2.29    0.68
   0   3   5    2.08    0.48
   0  -3  -6    1.30    0.49
   0  -3  -6    1.45    0.41
   0   3   6    0.73    0.49
   0   3   6    1.46    0.41
   0  -3  -6    0.52    0.43
   0  -3  -6    0.14    0.62
   0   3   6    0.89    0.41
   0   3   6    1.05    0.64
   0  -3  -7   48.41    1.91
   0  -3  -7   50.75    1.88
   0   3   7   51.81    1.92
   0   3   7   49.99    1.97
   0  -3  -7   46.41    1.72
   0  -3  -7   44.92    1.88
   0   3   7   48.45    1.75
   0   3   7   46.12    1.91
   0  -3  -8   19.50    1.11
   0  -3  -8   20.85    1.08
   0   3   8   21.63    1.10
   0   3   8   18.88    1.11
   0  -3  -8   20.19    1.03
   0  -3  -8   20.85    1.24
   0   3   8   23.27    1.29
   0   3   8   22.86    1.06
   0  -3  -9 1032.48   28.93
   0  -3  -9 1033.12   28.85
   0   3   9 1039.16   29.02
   0   3   9 1011.66   28.39
   0  -3  -9 1017.54   27.83
   0  -3  -9  987.34   27.19
   0   3   9 1019.93   28.04
   0   3   9 1004.83   27.48
   0  -3 -10    6.71    0.76
   0  -3 -10    8.09    0.72
   0   3  10    8.54    0.73
   0   3  10    9.97    0.89
   0  -3 -10    8.47    0.73
   0  -3 -10    7.53    0.87
   0   3  10    9.50    0.87
   0   3  10    8.57    0.70
   0  -3 -11  103.49    3.46
   0  -3 -11  102.95    3.56
   0   3  11  105.60    3.53
   0   3  11  107.08    3.69
   0  -3 -11  104.34    3.34
   0  -3 -11  101.18    3.48
   0   3  11   98.46    3.31
   0   3  11  102.14    3.26
   0  -3 -12    1.73    0.48
   0  -3 -12    1.08    0.56
   0   3  12    1.16    0.45
   0   3  12    1.45    0.57
   0  -3 -12    1.62    0.49
   0  -3 -12    2.15    0.70
   0   3  12    0.70    0.62
   0   3  12    1.26    0.48
   0  -3 -13    2.65    0.54
   0  -3 -13    3.35    0.65
   0   3  13    2.48    0.64
   0   3  13    3.12    0.56
   0  -3 -13    3.23    0.57
   0  -3 -13    3.05    0.75
   0   3  13    2.77    0.65
   0   3  13    3.45    0.57
   0  -3 -14    6.50    0.83
   0  -3 -14    6.71    0.75
   0   3  14    7.98    0.89
   0   3  14    6.82    0.73
   0  -3 -14    6.06    0.70
   0  -3 -14    8.06    0.95
   0   3  14    8.65    0.84
   0   3  14    8.57    0.76
   0  -3 -15   75.85    2.85
   0  -3 -15   80.82    3.10
   0   3  15   79.74    2.94
   0   3  15   77.26    3.02
   0  -3 -15   78.64    2.78
   0  -3 -15   81.04    3.07
   0   3  15   76.15    2.77
   0   3  15   79.30    2.77
   0  -3 -16    9.55    0.89
   0  -3 -16    7.37    0.89
   0   3  16    8.39    0.97
   0   3  16    8.33    0.83
   0  -3 -16    7.42    0.79
   0  -3 -16    7.07    0.97
   0   3  16    8.87    0.83
   0   3  16    9.09    0.91
   0  -3 -17    0.48    0.49
   0  -3 -17    0.14    0.51
   0   3  17   -0.05    0.45
   0   3  17    0.24    0.56
   0  -3 -17   -0.19    0.49
   0  -3 -17   -0.32    0.68
   0   3  17   -0.08    0.64
   0  -3 -18    4.29    0.70
   0  -3 -18    3.99    0.75
   0   3  18    3.89    0.79
   0   3  18    4.12    0.67
   0  -3 -18    4.56    0.92
   0  -3 -18    3.12    0.65
   0   3  18    4.28    0.68
   0   3  18    3.04    0.72
   0  -3 -19    9.09    0.95
   0  -3 -19    8.73    1.00
   0   3  19   10.36    1.08
   0   3  19    9.57    0.94
   0  -3 -19   10.28    0.99
   0  -3 -19   11.59    1.22
   0   3  19   10.78    1.00
   0   3  19   11.01    0.95
   0  -3 -20   19.82    1.34
   0   3  20   20.54    1.51
   0  -3 -20   23.25    1.41
   0  -3 -20   23.62    1.65
   0   3  20   23.83    1.37
   0   3  20   20.55    1.32
   0  -3 -21  104.69    3.72
   0  -3 -21   92.82    3.67
   0   3  21   98.51    3.50
   0   3  21   97.80    3.51
   0  -3 -22    2.34    0.68
   0  -3 -22    2.57    0.68
   0   3  22    2.62    0.81
   0   3  22    2.02    0.59
   0  -3 -22    1.86    0.86
   0  -3 -22    1.99    0.67
   0   3  22    2.64    0.67
   0   3  22    1.67    0.60
   0  -3 -23   26.57    1.68
   0  -3 -23   29.29    1.80
   0   3  23   30.96    1.92
   0   3  23   30.76    1.73
   0  -3 -23   28.99    1.67
   0  -3 -23   29.39    1.94
   0   3  23   30.96    1.67
   0   3  23   29.32    1.65
   0  -3 -24    2.62    0.70
   0  -3 -24    2.99    0.76
   0   3  24    2.77    0.70
   0   3  24    2.38    0.76
   0  -3 -24    3.21    0.75
   0  -3 -24    2.23    0.91
   0   3  24    3.69    0.72
   0   3  24    2.29    0.68
   0  -3 -25   25.16    1.68
   0  -3 -25   23.27    1.67
   0   3  25   24.24    1.78
   0   3  25   28.32    1.70
   0  -3 -25   28.42    1.76
   0  -3 -25   26.72    1.94
   0   3  25   25.89    1.59
   0   3  25   25.92    1.57
   0  -3 -26    7.61    0.99
   0  -3 -26    7.92    1.06
   0   3  26    8.57    1.13
   0   3  26    8.15    0.97
   0  -3 -26    6.72    1.18
   0  -3 -26    7.69    1.03
   0   3  26    7.14    0.97
   0   3  26    8.84    0.99
   0  -3 -27   11.92    1.21
   0  -3 -27    8.74    1.10
   0   3  27   14.05    1.40
   0   3  27   10.41    1.10
   0  -3 -27   10.49    1.18
   0  -3 -27   12.73    1.45
   0   3  27   12.11    1.16
   0   3  27   12.41    1.22
   0  -3 -28    0.21    0.56
   0  -3 -28    0.68    0.62
   0   3  28    0.13    0.59
   0   3  28    1.22    0.67
   0  -3 -28    0.25    0.65
   0  -3 -28    0.16    0.89
   0   3  28    0.25    0.60
   0   3  28   -0.27    0.64
   0  -3 -29    5.44    0.91
   0  -3 -29    7.85    1.08
   0   3  29    5.34    1.02
   0   3  29    8.17    1.02
   0  -3 -29    7.10    1.05
   0  -3 -29    4.51    1.13
   0   3  29    6.98    0.99
   0   3  29    7.99    0.99
   0  -3 -30   66.06    3.02
   0  -3 -30   56.01    2.85
   0   3  30   58.60    3.04
   0   3  30   55.72    2.64
   0  -3 -30   54.07    2.77
   0  -3 -30   60.08    3.23
   0   3  30   57.47    2.67
   0   3  30   55.07    2.61
   0  -3 -31   73.42    3.29
   0  -3 -31   69.55    3.26
   0   3  31   73.97    3.56
   0   3  31   73.51    3.23
   0  -3 -31   75.05    3.45
   0  -3 -31   74.21    3.77
   0   3  31   71.54    3.13
   0   3  31   68.93    3.08
   0  -3 -32  139.26    5.20
   0  -3 -32  136.78    5.17
   0  -3 -32  135.70    5.58
   0  -3 -32  144.89    5.45
   0   3  32  136.53    4.97
   0   3  32  136.71    4.99
   0  -3 -33    1.62    0.75
   0  -3 -33    1.51    0.72
   0   3  33    0.41    0.65
   0   3  33    0.84    0.79
   0  -3 -33    0.37    1.05
   0  -3 -33    1.08    0.83
   0   3  33    0.79    0.70
   0   3  33    0.32    0.72
   0  -3 -34   86.15    3.78
   0  -3 -34   95.76    4.02
   0   3  34  101.39    4.43
   0   3  34   92.55    3.86
   0  -3 -34   89.40    4.39
   0  -3 -34   97.53    5.05
   0   3  34   93.28    3.91
   0   3  34   91.77    3.85
   0  -3 -35  103.88    4.31
   0  -3 -35   92.58    3.97
   0   3  35   94.97    4.31
   0   3  35   97.38    4.04
   0  -3 -35   99.48    4.31
   0  -3 -35   85.16    4.32
   0   3  35   92.92    3.91
   0   3  35   96.14    3.99
   0  -3 -36   14.00    1.53
   0  -3 -36   14.54    1.54
   0   3  36   18.33    1.86
   0   3  36   16.63    1.53
   0  -3 -36   14.54    1.64
   0  -3 -36   16.55    2.02
   0   3  36   13.45    1.43
   0   3  36   18.52    1.64
   0  -3 -37   27.39    2.07
   0   3  37   18.93    1.89
   0   3  37   23.33    1.84
   0  -3 -37   20.87    2.26
   0  -3 -37   20.57    1.94
   0   3  37   22.84    1.80
   0   3  37   26.57    2.00
   0  -3 -38   31.74    2.59
   0   3  38   31.74    2.43
   0  -3 -38   35.73    2.54
   0  -3 -38   31.72    2.72
   0   3  38   32.20    2.16
   0   3  38   31.31    2.18
   0  -3 -39  225.54    7.84
   0   3  39  233.96    7.98
   0  -3 -39  233.64    8.41
   0  -3 -39  222.04    8.46
   0   3  39  212.98    7.36
   0   3  39  217.59    7.52
   0  -3 -40    9.71    1.35
   0  -3 -40    9.63    1.32
   0   3  40    9.65    1.51
   0   3  40   13.81    1.48
   0  -3 -40    8.98    1.67
   0  -3 -40    9.38    1.59
   0   3  40   10.71    1.40
   0   3  40   11.98    1.46
   0  -3 -41    5.34    1.13
   0  -3 -41    6.74    1.14
   0   3  41    7.71    1.14
   0   3  41    4.69    1.16
   0  -3 -41    2.92    1.38
   0  -3 -41    5.72    1.26
   0   3  41    5.53    1.14
   0   3  41    6.47    1.14
   0  -3 -42    2.75    0.94
   0  -3 -42    6.34    1.16
   0   3  42    4.91    1.00
   0   3  42    2.53    1.05
   0  -3 -42    4.72    1.30
   0  -3 -42    3.69    1.43
   0   3  42    2.15    0.97
   0   3  42    3.48    1.08
   0  -3 -43    6.01    1.10
   0   3  43    5.53    1.32
   0   3  43    5.45    1.06
   0  -3 -43    4.61    1.27
   0  -3 -43    5.59    1.54
   0   3  43    4.97    1.21
   0   3  43    6.64    1.26
   0   3  44   11.98    1.72
   0   3  44   12.08    1.46
   0  -3 -44   11.28    1.88
   0  -3 -44   12.19    1.75
   0  -3 -45    1.84    0.78
   0  -3 -45    0.48    0.75
   0   3  45    0.21    0.81
   0   3  45    0.60    0.79
   0  -3 -45    0.51    1.29
   0  -3 -45    1.19    0.94
   0  -3 -46   10.62    1.45
   0  -3 -46   11.24    1.49
   0   3  46    9.12    1.35
   0   3  46    8.09    1.51
   0  -3 -47    7.69    1.40
   0  -3 -47    8.06    1.26
   0   3  47    6.99    1.38
   0   3  47    9.63    1.34
   0  -3 -48    4.43    1.18
   0  -3 -48    4.10    1.13
   0   3  48    5.52    1.34
   0   3  48    4.97    1.10
   0  -4  49   -0.60    0.84
   0  -4  49   -0.37    0.84
   0   4 -49   -0.22    0.84
   0   4 -49    0.30    0.70
   0  -4  48   -0.51    0.72
   0  -4  48    0.14    0.76
   0   4 -48    0.91    0.72
   0   4 -48    0.38    0.83
   0   4 -48    2.07    1.32
   0   4 -48   -0.76    1.22
   0  -4  47   -0.06    1.24
   0  -4  47    1.59    0.84
   0   4 -47    0.84    0.75
   0   4 -47   -0.91    0.72
   0  -4  47    0.68    1.08
   0  -4  47   -0.64    0.92
   0   4 -47   -0.30    1.14
   0   4 -47    1.37    1.34
   0  -4  46    0.38    0.79
   0  -4  46    0.49    0.86
   0   4 -46    0.79    0.70
   0   4 -46    1.14    0.87
   0  -4  46    0.02    1.05
   0  -4  46    1.00    0.99
   0   4 -46   -0.73    1.38
   0   4 -46    2.34    1.40
   0  -4  45   11.14    1.67
   0  -4  45   14.53    1.67
   0   4 -45   10.95    1.43
   0   4 -45   11.48    1.57
   0  -4  45   16.07    2.11
   0  -4  45   10.86    1.84
   0   4 -45   11.44    2.19
   0   4 -45    9.52    2.05
   0  -4  44   23.90    2.05
   0  -4  44   18.82    2.02
   0   4 -44   22.95    1.92
   0   4 -44   24.95    2.23
   0  -4  44   20.50    2.40
   0  -4  44   23.32    2.46
   0   4 -44   19.31    2.73
   0   4 -44   18.26    2.51
   0  -4  43    0.14    0.79
   0  -4  43    2.07    0.92
   0   4 -43    0.83    0.84
   0   4 -43    0.19    0.62
   0  -4  43    0.78    1.10
   0  -4  43    1.68    1.10
   0   4 -43   -0.24    1.22
   0   4 -43    3.83    1.61
   0  -4  42   35.75    3.21
   0  -4  42   41.09    2.59
   0   4 -42   39.86    2.70
   0   4 -42   42.58    2.53
   0  -4  42   44.82    3.21
   0  -4  42   36.08    3.07
   0   4 -42   30.66    3.15
   0   4 -42   38.32    3.50
   0  -4  41   -0.95    0.89
   0  -4  41    1.67    1.16
   0   4 -41    0.32    1.27
   0   4 -41   -1.13    1.27
   0  -4  40    1.99    0.97
   0  -4  40    1.88    0.89
   0   4 -40    4.67    0.95
   0   4 -40    1.83    0.87
   0  -4  40    5.59    1.34
   0  -4  40    4.97    1.45
   0   4 -40    1.53    1.43
   0   4 -40    5.72    1.65
   0  -4  39    0.40    0.83
   0  -4  39    2.08    0.83
   0   4 -39    0.91    0.73
   0   4 -39    0.38    0.75
   0  -4  39    0.76    0.94
   0  -4  39   -0.25    1.14
   0   4 -39    1.89    1.30
   0   4 -39    1.95    1.29
   0  -4  38   49.22    2.75
   0  -4  38   48.51    2.97
   0  -4  38   49.53    3.43
   0  -4  38   52.55    3.39
   0   4 -38   50.91    3.64
   0   4 -38   50.78    3.70
   0  -4  37   42.56    2.78
   0  -4  37   37.05    2.35
   0   4 -37   41.09    2.43
   0   4 -37   38.81    2.53
   0  -4  37   38.18    2.80
   0  -4  37   35.06    2.80
   0   4 -37   40.96    3.21
   0   4 -37   37.26    3.26
   0  -4  36   13.88    1.61
   0  -4  36   14.70    1.49
   0   4 -36   14.23    1.53
   0   4 -36   14.46    1.43
   0  -4  36   15.45    1.92
   0  -4  36   14.56    1.75
   0   4 -36   17.82    2.27
   0   4 -36   11.21    1.81
   0  -4  35   33.01    2.35
   0  -4  35   36.25    2.27
   0  -4  35   34.79    2.56
   0  -4  35   36.46    2.73
   0   4 -35   29.28    2.73
   0   4 -35   33.11    2.70
   0  -4  34    0.97    0.75
   0  -4  34    0.17    0.68
   0   4 -34    1.24    0.68
   0   4 -34    0.99    0.70
   0  -4  34   -1.37    0.95
   0  -4  34   -0.43    0.83
   0   4 -34   -1.61    0.95
   0   4 -34    0.99    1.13
   0  -4  33  116.00    4.78
   0  -4  33  118.59    4.67
   0   4 -33  120.89    4.78
   0   4 -33  121.59    4.61
   0   4 -33  120.70    5.45
   0   4 -33  124.04    5.72
   0  -4  32    7.26    1.08
   0  -4  32    7.55    1.19
   0   4 -32    7.17    1.35
   0   4 -32    9.17    1.14
   0  -4  32   10.30    1.46
   0  -4  32   11.38    1.56
   0   4 -32   13.88    1.91
   0   4 -32   10.94    1.67
   0  -4  31   69.65    3.16
   0  -4  31   68.52    3.24
   0   4 -31   66.12    3.08
   0  -4  31   64.80    3.45
   0  -4  31   66.37    3.59
   0   4 -31   64.83    3.93
   0   4 -31   68.49    3.77
   0  -4  30    2.24    0.79
   0  -4  30    1.45    0.72
   0   4 -30   -0.29    0.59
   0   4 -30    1.38    0.67
   0  -4  30    2.59    0.97
   0  -4  30    1.29    0.94
   0   4 -30    1.97    1.05
   0   4 -30    2.19    1.11
   0  -4  29   10.49    1.18
   0  -4  29   10.76    1.19
   0   4 -29   10.97    1.18
   0   4 -29   10.49    1.11
   0  -4  29   11.79    1.49
   0   4 -29   13.38    1.72
   0   4 -29    8.60    1.51
   0  -4  28    5.85    0.94
   0  -4  28    4.59    0.86
   0   4 -28    5.32    0.86
   0   4 -28    4.91    0.86
   0  -4  28    4.75    1.18
   0  -4  27  111.12    4.28
   0  -4  27  112.02    4.28
   0   4 -27  111.62    4.23
   0   4 -27  112.10    4.12
   0   4 -26   71.01    3.04
   0   4 -26   65.83    2.81
   0  -4  26   66.53    3.42
   0   4 -26   68.20    3.56
   0  -4  25   -0.37    0.52
   0  -4  25    0.81    0.57
   0   4 -25    0.59    0.54
   0   4 -25   -0.43    0.56
   0  -4  25    0.70    0.87
   0  -4  25    0.67    0.78
   0   4 -25    1.86    0.99
   0   4 -25    0.46    0.86
   0  -4  24  220.61    7.33
   0  -4  24  218.70    7.42
   0  -4  24  230.78    7.98
   0   4 -24  231.58    7.93
   0   4 -24  230.78    8.17
   0  -4  23  237.62    7.69
   0  -4  23  231.42    8.07
   0   4 -23  241.59    8.39
   0   4 -23  257.17    8.57
   0  -4  22  254.62    8.01
   0  -4  22  258.44    8.14
   0   4 -22  266.54    8.23
   0   4 -22  263.68    8.25
   0  -4  22  264.64    8.77
   0  -4  22  273.86    8.79
   0   4 -22  259.71    8.60
   0   4 -22  266.07    9.00
   0  -4  21  700.93   20.22
   0  -4  21  713.01   20.52
   0   4 -21  685.51   19.77
   0   4 -21  670.26   19.25
   0  -4  21  710.31   20.74
   0  -4  21  688.06   19.90
   0   4 -21  678.68   20.07
   0   4 -21  693.46   20.23
   0  -4  20   38.67    1.91
   0  -4  20   41.13    1.97
   0   4 -20   43.99    1.97
   0   4 -20   42.15    1.99
   0  -4  20   39.35    2.18
   0  -4  20   40.85    2.42
   0   4 -20   39.32    2.35
   0   4 -20   40.23    2.53
   0  -4  19    9.33    0.92
   0  -4  19    7.04    0.81
   0   4 -19    9.76    0.91
   0   4 -19    9.36    0.91
   0  -4  19    7.85    1.08
   0  -4  19    8.79    1.21
   0   4 -19   11.30    1.29
   0   4 -19    7.53    1.21
   0  -4  18   36.29    1.80
   0  -4  18   34.95    1.72
   0   4 -18   36.60    1.72
   0   4 -18   33.66    1.70
   0  -4  18   35.87    2.21
   0  -4  18   36.75    2.07
   0   4 -18   35.03    2.24
   0   4 -18   36.38    2.15
   0  -4  17    2.24    0.59
   0  -4  17    2.34    0.57
   0   4 -17    2.72    0.57
   0   4 -17    1.84    0.56
   0  -4  17    2.27    0.83
   0  -4  17    3.18    0.81
   0   4 -17    2.70    0.92
   0   4 -17    2.26    0.87
   0  -4  16   45.55    1.97
   0  -4  16   45.36    1.95
   0   4 -16   44.85    1.97
   0   4 -16   41.69    1.81
   0  -4  16   46.32    2.46
   0  -4  16   46.67    2.34
   0   4 -16   43.88    2.46
   0   4 -16   46.43    2.38
   0  -4  15  302.47    9.01
   0  -4  15  304.05    9.08
   0   4 -15  300.08    8.98
   0   4 -15  316.93    9.36
   0  -4  15  308.66    9.68
   0  -4  15  290.39    8.98
   0   4 -15  304.85    9.68
   0   4 -15  305.17    9.46
   0  -4  14    0.86    0.45
   0  -4  14    0.29    0.43
   0   4 -14    1.53    0.48
   0   4 -14    0.76    0.43
   0  -4  14    0.81    0.67
   0  -4  14    0.49    0.75
   0   4 -14    0.73    0.68
   0   4 -14    3.08    0.92
   0  -4  13   47.67    1.91
   0  -4  13   48.00    1.94
   0   4 -13   46.97    1.86
   0   4 -13   49.27    1.99
   0  -4  13   48.52    2.29
   0  -4  13   49.43    2.46
   0   4 -13   53.21    2.45
   0   4 -13   51.26    2.62
   0  -4  12 1281.54   35.67
   0  -4  12 1263.58   35.22
   0   4 -12 1308.56   36.48
   0   4 -12 1250.71   34.79
   0  -4  12 1205.89   33.49
   0  -4  12 1277.09   35.59
   0   4 -12 1244.03   34.81
   0   4 -12 1308.56   36.29
   0  -4  11   14.50    0.89
   0  -4  11   14.48    0.92
   0   4 -11   13.97    0.91
   0   4 -11   13.05    0.83
   0  -4  11   13.56    1.34
   0  -4  11   15.15    1.22
   0   4 -11   14.11    1.22
   0   4 -11   13.38    1.37
   0  -4  10  133.62    4.24
   0  -4  10  143.71    4.45
   0   4 -10  153.00    4.75
   0   4 -10  142.86    4.42
   0  -4  10  143.38    5.01
   0  -4  10  138.34    4.72
   0   4 -10  143.81    5.13
   0   4 -10  146.80    4.94
   0   4  -9  773.09   21.65
   0   4  -9  797.09   22.36
   0  -4   9  776.59   21.87
   0  -4   9  792.00   22.43
   0   4  -9  769.12   21.65
   0   4  -9  766.10   21.84
   0  -4   8  119.43    3.80
   0  -4   8  129.65    4.01
   0   4  -8  122.02    3.85
   0   4  -8  126.88    3.93
   0  -4   8  131.14    4.63
   0  -4   8  123.66    4.24
   0   4  -8  124.37    4.50
   0   4  -8  120.57    4.16
   0  -4   7  175.79    5.23
   0  -4   7  170.70    5.18
   0   4  -7  175.31    5.23
   0   4  -7  177.06    5.34
   0  -4   7  174.84    5.77
   0  -4   7  170.70    5.47
   0   4  -7  178.49    5.93
   0   4  -7  174.84    5.61
   0  -4   6    1.51    0.45
   0  -4   6    1.29    0.37
   0   4  -6    1.70    0.37
   0   4  -6    1.26    0.43
   0  -4   6    2.26    0.67
   0  -4   6    0.86    0.76
   0   4  -6    1.34    0.67
   0   4  -6    1.92    0.83
   0  -4   5   34.98    1.35
   0  -4   5   33.04    1.40
   0   4  -5   34.16    1.40
   0   4  -5   32.11    1.27
   0  -4   5   33.04    1.68
   0  -4   5   36.70    1.94
   0   4  -5   36.05    1.97
   0   4  -5   35.30    1.73
   0  -4   4  178.01    5.34
   0  -4   4  188.03    5.53
   0   4  -4  185.17    5.47
   0   4  -4  177.70    5.32
   0  -4   4  176.42    5.72
   0  -4   4  185.48    5.80
   0   4  -4  182.94    5.98
   0   4  -4  174.68    5.48
   0  -4   3  998.31   27.70
   0  -4   3  955.87   26.64
   0   4  -3 1008.01   28.05
   0   4  -3  973.52   27.04
   0  -4   3  995.93   27.54
   0  -4   3 1024.22   28.47
   0   4  -3 1001.81   27.67
   0   4  -3  982.58   27.42
   0  -4   2  126.52    3.85
   0  -4   2  133.24    4.13
   0   4  -2  125.63    3.89
   0   4  -2  124.10    3.80
   0  -4   2  129.55    4.23
   0  -4   2  128.73    4.40
   0   4  -2  122.89    4.28
   0   4  -2  129.06    4.21
   0  -4   1   18.64    0.89
   0  -4   1   19.39    1.02
   0   4  -1   17.99    0.97
   0   4  -1   16.58    0.84
   0  -4   1   18.74    1.19
   0  -4   1   18.99    1.37
   0   4  -1   15.85    1.10
   0   4  -1   19.50    1.40
   0  -4   0    6.96    0.57
   0  -4   0    7.45    0.68
   0   4   0    6.12    0.62
   0   4   0    6.41    0.56
   0  -4   0    6.76    0.79
   0  -4   0    7.12    0.99
   0   4   0    6.15    0.95
   0   4   0    6.37    0.76
   0  -4  -1    6.74    0.57
   0  -4  -1    5.72    0.64
   0   4   1    6.39    0.65
   0   4   1    5.64    0.54
   0  -4  -1    5.29    0.91
   0  -4  -1    5.63    0.73
   0   4   1    6.36    0.75
   0   4   1    5.10    0.92
   0  -4  -2   45.27    1.67
   0  -4  -2   50.65    1.92
   0   4   2   50.16    1.92
   0   4   2   48.10    1.75
   0  -4  -2   49.19    2.19
   0  -4  -2   47.29    1.89
   0   4   2   47.35    2.16
   0   4   2   44.79    1.83
   0  -4  -3  303.42    8.76
   0  -4  -3  305.96    8.95
   0   4   3  292.61    8.58
   0   4   3  297.22    8.60
   0  -4  -3  295.95    8.81
   0  -4  -3  291.98    8.46
   0   4   3  296.43    8.58
   0   4   3  293.88    8.79
   0  -4  -4   36.06    1.45
   0  -4  -4   35.05    1.54
   0   4   4   36.56    1.59
   0   4   4   36.41    1.48
   0  -4  -4   35.65    1.54
   0  -4  -4   37.48    1.84
   0  -4  -5  117.43    3.72
   0  -4  -5  113.42    3.74
   0   4   5  110.08    3.64
   0   4   5  112.63    3.61
   0  -4  -5  107.00    3.46
   0  -4  -5  110.04    3.80
   0   4   5  113.36    3.62
   0   4   5  107.95    3.77
   0  -4  -6  485.57   13.83
   0  -4  -6  490.02   14.08
   0   4   6  497.96   14.29
   0   4   6  507.82   14.45
   0  -4  -6  499.08   14.24
   0  -4  -6  484.77   13.61
   0   4   6  502.89   14.08
   0   4   6  507.82   14.51
   0  -4  -7   65.72    2.35
   0  -4  -7   67.57    2.53
   0   4   7   67.92    2.43
   0   4   7   68.82    2.57
   0  -4  -7   62.32    2.24
   0  -4  -7   61.81    2.48
   0   4   7   66.06    2.34
   0   4   7   67.41    2.65
   0  -4  -8   39.74    1.67
   0  -4  -8   45.95    1.95
   0   4   8   46.76    1.99
   0  -4  -8   47.89    1.89
   0  -4  -8   44.49    2.03
   0   4   8   44.38    1.75
   0   4   8   43.38    2.00
   0  -4  -9  376.37   10.95
   0  -4  -9  377.96   11.11
   0   4   9  377.17   10.97
   0   4   9  373.99   11.01
   0  -4  -9  370.33   10.79
   0  -4  -9  361.59   10.32
   0   4   9  358.57   10.46
   0   4   9  357.14   10.17
   0  -4 -10   55.12    2.15
   0  -4 -10   56.79    2.32
   0   4  10   57.54    2.23
   0   4  10   58.87    2.38
   0  -4 -10   62.34    2.30
   0  -4 -10   56.50    2.38
   0   4  10   54.18    2.27
   0   4  10   55.76    2.07
   0  -4 -11   17.13    1.06
   0  -4 -11   17.36    1.18
   0   4  11   16.56    1.03
   0   4  11   15.02    1.10
   0  -4 -11   14.27    1.16
   0  -4 -11   16.56    1.03
   0   4  11   16.74    0.99
   0   4  11   14.53    1.14
   0  -4 -12 1150.26   32.23
   0  -4 -12 1169.65   32.90
   0   4  12 1148.99   32.20
   0   4  12 1099.72   31.01
   0  -4 -12 1149.46   31.79
   0  -4 -12 1176.64   32.27
   0   4  12 1162.34   31.84
   0   4  12 1156.46   31.93
   0  -4 -13  274.81    8.30
   0  -4 -13  272.74    8.38
   0   4  13  273.06    8.23
   0   4  13  264.64    8.19
   0  -4 -13  281.64    8.50
   0  -4 -13  285.78    8.34
   0   4  13  272.58    8.15
   0   4  13  274.17    8.03
   0  -4 -14    5.99    0.75
   0  -4 -14    6.82    0.87
   0   4  14    6.25    0.75
   0   4  14    5.90    0.84
   0  -4 -14    6.93    0.99
   0  -4 -14    6.50    0.75
   0   4  14    8.17    0.78
   0   4  14    6.48    0.86
   0  -4 -15   83.76    3.23
   0  -4 -15   84.24    3.12
   0   4  15   75.62    2.86
   0   4  15   76.67    3.05
   0  -4 -15   82.24    2.91
   0  -4 -15   80.84    3.16
   0   4  15   81.46    2.88
   0   4  15   86.38    3.16
   0  -4 -16    7.87    0.84
   0  -4 -16    6.68    0.87
   0   4  16    6.31    0.89
   0   4  16    7.95    0.83
   0  -4 -16    7.23    0.78
   0  -4 -16    8.54    1.08
   0   4  16    6.82    0.91
   0   4  16    6.52    0.78
   0  -4 -17   14.38    1.21
   0  -4 -17   16.24    1.22
   0   4  17   15.58    1.13
   0   4  17   14.65    1.24
   0  -4 -17   16.10    1.37
   0  -4 -17   16.18    1.10
   0   4  17   16.31    1.22
   0   4  17   15.05    1.05
   0  -4 -18  665.49   19.33
   0  -4 -18  661.35   19.10
   0   4  18  686.31   19.95
   0   4  18  650.39   18.77
   0  -4 -18  683.61   19.52
   0  -4 -18  671.05   18.83
   0   4  18  672.96   18.87
   0   4  18  659.92   18.63
   0   4  19    3.26    0.84
   0  -4 -19    2.35    0.67
   0  -4 -19    4.10    0.94
   0   4  19    3.70    0.78
   0   4  19    3.37    0.60
   0  -4 -20  284.82    8.52
   0  -4 -20  286.09    8.92
   0   4  20  270.36    8.09
   0   4  20  277.51    8.38
   0  -4 -21   25.61    1.67
   0  -4 -21   26.08    1.59
   0   4  21   25.22    1.56
   0   4  21   21.54    1.62
   0  -4 -21   19.31    1.38
   0  -4 -21   20.87    1.88
   0   4  21   24.48    1.51
   0   4  21   23.06    1.37
   0  -4 -22    1.89    0.64
   0  -4 -22    1.56    0.68
   0   4  22    1.13    0.51
   0   4  22    0.41    0.64
   0  -4 -22    1.64    0.67
   0  -4 -22    1.05    0.83
   0   4  22    0.84    0.51
   0   4  22    1.37    0.65
   0  -4 -23   19.76    1.43
   0  -4 -23   18.04    1.48
   0   4  23   20.65    1.43
   0   4  23   18.04    1.53
   0  -4 -23   20.69    1.41
   0  -4 -23   20.76    1.67
   0   4  23   20.76    1.34
   0   4  23   21.89    1.45
   0  -4 -24    0.84    0.65
   0  -4 -24    1.22    0.56
   0   4  24    0.22    0.65
   0   4  24    1.14    0.56
   0  -4 -24    1.00    0.65
   0  -4 -24    1.11    0.81
   0   4  24    1.10    0.59
   0   4  24    0.03    0.57
   0  -4 -25    1.16    0.72
   0  -4 -25    2.18    0.65
   0   4  25    1.54    0.65
   0   4  25    2.42    0.78
   0  -4 -25    2.21    0.94
   0  -4 -25    1.21    0.64
   0   4  25    1.05    0.62
   0   4  25    1.41    0.60
   0  -4 -26    1.18    0.70
   0  -4 -26    1.51    0.60
   0   4  26    0.95    0.57
   0   4  26    2.08    0.79
   0  -4 -26    2.18    0.70
   0  -4 -26    0.84    0.89
   0   4  26    2.40    0.70
   0   4  26    1.72    0.62
   0  -4 -27   56.81    2.67
   0  -4 -27   60.38    2.88
   0   4  27   62.94    2.83
   0   4  27   61.72    3.04
   0  -4 -27   55.66    3.00
   0  -4 -27   57.81    2.62
   0   4  27   58.41    2.62
   0   4  27   59.25    2.57
   0  -4 -28   89.77    3.77
   0  -4 -28   82.33    3.53
   0   4  28   84.02    3.75
   0   4  28   82.09    3.42
   0  -4 -28   80.96    3.74
   0  -4 -28   81.98    3.39
   0   4  28   83.35    3.27
   0   4  28   86.80    3.45
   0  -4 -29   29.80    2.00
   0  -4 -29   30.99    1.97
   0   4  29   33.46    1.99
   0   4  29   30.14    2.16
   0  -4 -29   33.25    2.03
   0  -4 -29   30.91    2.29
   0   4  29   33.06    1.86
   0   4  29   29.37    1.84
   0  -4 -30    0.81    0.70
   0  -4 -30    1.78    0.67
   0   4  30    0.79    0.60
   0   4  30    1.22    0.73
   0  -4 -30    0.33    0.68
   0  -4 -30    0.81    1.05
   0   4  30    0.60    3.46
   0   4  30    1.16    0.64
   0  -4 -31   33.41    2.10
   0  -4 -31   29.37    2.05
   0   4  31   30.37    1.95
   0   4  31   33.62    2.27
   0  -4 -31   36.62    2.59
   0  -4 -31   29.39    2.00
   0   4  31   36.02    2.08
   0   4  31   32.76    1.95
   0  -4 -32    4.21    0.99
   0  -4 -32    5.58    0.95
   0   4  32    4.80    1.14
   0   4  32    5.59    0.97
   0  -4 -32    5.10    1.27
   0  -4 -32    5.45    1.02
   0   4  32    5.52    0.91
   0   4  32    5.45    0.95
   0  -4 -33   -0.11    0.72
   0  -4 -33    0.72    0.65
   0   4  33    1.48    0.89
   0  -4 -33    1.32    0.76
   0  -4 -33    0.13    1.02
   0   4  33   -0.13    0.70
   0   4  33    0.76    0.70
   0  -4 -34   29.71    2.08
   0  -4 -34   32.36    2.16
   0   4  34   28.67    2.23
   0   4  34   31.34    2.03
   0  -4 -34   32.55    2.26
   0  -4 -34   29.29    2.46
   0   4  34   30.45    1.95
   0   4  34   32.39    2.00
   0  -4 -35    6.33    1.10
   0  -4 -35    3.91    1.00
   0   4  35    6.20    1.00
   0   4  35    6.99    1.26
   0  -4 -35    7.53    1.21
   0  -4 -35    3.81    1.38
   0   4  35    6.72    1.02
   0   4  35    6.93    1.06
   0  -4 -36  111.74    4.59
   0  -4 -36  114.09    4.99
   0   4  36  104.52    4.26
   0   4  36   95.51    4.47
   0  -4 -36  103.61    4.48
   0  -4 -36  106.32    4.97
   0   4  36  104.34    4.20
   0   4  36  103.44    4.15
   0  -4 -37   10.84    1.48
   0   4  37   13.00    1.59
   0  -4 -37   14.62    1.59
   0  -4 -37   12.54    1.80
   0   4  37   12.84    1.37
   0   4  37   14.48    1.45
   0   4  38    6.23    1.11
   0  -4 -38    8.07    1.54
   0  -4 -38    5.61    1.18
   0   4  38    6.93    1.06
   0   4  38    6.44    1.05
   0  -4 -39   50.05    2.80
   0  -4 -39   46.44    2.78
   0   4  39   43.84    2.53
   0   4  39   48.03    3.07
   0  -4 -39   44.42    2.92
   0  -4 -39   49.70    3.34
   0   4  39   49.84    2.75
   0   4  39   46.67    2.61
   0  -4 -40    0.40    0.67
   0  -4 -40    0.67    0.73
   0   4  40    0.49    0.73
   0   4  40    0.72    0.83
   0  -4 -40    0.70   13.30
   0  -4 -40    0.33    0.87
   0   4  40    0.03    0.70
   0   4  40    0.02    0.70
   0  -4 -41    6.33    1.14
   0  -4 -41    3.93    1.06
   0   4  41    5.18    1.02
   0   4  41    7.31    1.40
   0  -4 -41    5.45    1.18
   0  -4 -41    7.68    1.61
   0   4  41    4.82    1.06
   0   4  41    6.06    1.14
   0  -4 -42   21.98    2.00
   0  -4 -42   21.38    1.86
   0   4  42   22.54    1.86
   0   4  42   19.25    2.10
   0  -4 -42   23.16    2.15
   0  -4 -42   24.35    2.43
   0   4  42   23.92    1.95
   0   4  42   22.17    1.88
   0  -4 -43    3.91    1.02
   0  -4 -43    4.13    1.08
   0   4  43    6.61    1.11
   0   4  43    4.28    1.22
   0  -4 -43    6.42    1.30
   0  -4 -43    5.39    1.48
   0   4  43    5.63    1.08
   0   4  43    4.90    1.06
   0  -4 -44   11.22    1.43
   0  -4 -44    9.04    1.41
   0   4  44   11.75    1.45
   0   4  44    8.50    1.49
   0  -4 -44    9.39    1.78
   0  -4 -44    8.58    1.49
   0  -4 -45    4.56    1.03
   0  -4 -45    3.00    0.97
   0   4  45    4.39    1.06
   0   4  45    3.88    1.11
   0  -4 -45    3.66    1.40
   0  -4 -45    2.81    1.16
   0  -4 -46    0.99    0.78
   0  -4 -46    2.24    0.92
   0   4  46    0.22    0.75
   0   4  46    0.68    0.87
   0  -4 -47   -0.35    0.67
   0  -4 -47    0.87    0.91
   0   4  47    1.03    0.91
   0   4  47    0.46    0.76
   0  -4 -48    2.16    1.00
   0  -4 -48    0.87    0.79
   0   4  48    1.83    0.87
   0   4  48    2.53    1.00
   0  -5  48    1.14    0.84
   0  -5  48   -0.70    0.52
   0   5 -48   -1.35    1.19
   0   5 -48    0.68    1.27
   0   5 -47    8.15    1.45
   0   5 -47    9.25    1.29
   0   5 -47   11.40    2.21
   0   5 -47   10.22    2.02
   0  -5  46   14.03    1.78
   0  -5  46   16.97    1.83
   0   5 -46   19.69    1.83
   0   5 -46   17.29    1.91
   0  -5  46   14.92    2.19
   0  -5  46   15.23    2.10
   0   5 -46   12.75    2.32
   0   5 -46   15.61    2.51
   0  -5  45   28.77    2.27
   0  -5  45   31.30    2.62
   0   5 -45   32.92    2.34
   0   5 -45   28.93    2.37
   0  -5  45   34.05    3.12
   0  -5  45   29.93    2.81
   0   5 -45   32.06    3.48
   0   5 -45   29.50    3.08
   0  -5  44    0.67    0.87
   0  -5  44    1.06    0.78
   0   5 -44    1.05    0.78
   0   5 -44    0.40    0.78
   0  -5  44    1.34    1.16
   0  -5  44    3.32    1.22
   0   5 -44   -0.52    1.43
   0   5 -44   -0.14    1.32
   0  -5  43    2.67    0.92
   0  -5  43    1.45    0.97
   0   5 -43    2.19    0.87
   0   5 -43    2.30    0.84
   0  -5  43    5.50    1.46
   0  -5  43    2.89    1.27
   0   5 -43    1.81    1.41
   0   5 -43    2.53    1.64
   0   5 -42   41.93    2.50
   0   5 -42   36.49    2.57
   0  -5  42   44.52    3.42
   0  -5  42   43.17    3.16
   0   5 -42   43.82    3.77
   0   5 -42   45.54    3.69
   0  -5  41   12.21    1.89
   0  -5  41   11.41    1.76
   0   5 -41    9.97    1.99
   0   5 -41   12.29    2.11
   0  -5  40    0.78    0.75
   0  -5  40    0.45    0.84
   0   5 -40    1.51    0.73
   0   5 -40    0.92    0.78
   0  -5  40    0.22    0.94
   0  -5  40    0.43    1.08
   0   5 -40    0.10    1.32
   0   5 -40    1.61    1.26
   0  -5  39   25.24    2.24
   0  -5  39   25.67    1.97
   0   5 -39   28.45    2.00
   0   5 -39   27.15    2.11
   0  -5  39   27.94    2.50
   0  -5  39   26.89    2.62
   0   5 -39   28.85    2.94
   0   5 -39   25.89    2.69
   0  -5  38    2.11    0.99
   0  -5  38    2.42    0.87
   0   5 -38    1.56    0.73
   0   5 -38    2.27    0.84
   0  -5  38    3.85    1.35
   0  -5  38    2.10    1.13
   0   5 -38    1.34    1.27
   0   5 -38    2.34    1.32
   0  -5  37    6.20    1.24
   0  -5  37    7.87    1.21
   0   5 -37    7.34    1.08
   0   5 -37    8.31    1.27
   0  -5  37    8.11    1.48
   0  -5  37    8.15    1.56
   0   5 -37    6.14    1.65
   0   5 -37    9.97    1.91
   0  -5  36    6.14    1.10
   0  -5  36    5.05    1.11
   0   5 -36    4.67    1.05
   0   5 -36    5.36    0.97
   0  -5  36    5.59    1.35
   0  -5  36    6.68    1.46
   0   5 -36   10.97    1.94
   0   5 -36    6.64    1.56
   0   5 -35   23.28    1.70
[truncated: 10,938,483 more chars]
