# Supplementary material for: Investigating the Conformations of a Family of [M2L3]4+ Helicates Using Single Crystal X-ray Diffraction
Source: Molecules. 2023 Feb 1;28(3):1404. doi: 10.3390/molecules28031404 (PMC9921459; doi:10.3390/molecules28031404)
Supplement: Supplementary file 1 [file molecules-28-01404-s001.zip › Final cifs/2224289.cif]

####################################################################### 
# 
# This file contains crystal structure data downloaded from the 
# Cambridge Structural Database (CSD) hosted by the Cambridge 
# Crystallographic Data Centre (CCDC).
# 
# Full information about CCDC data access policies and citation 
# guidelines are available at http://www.ccdc.cam.ac.uk/access/V1 
# 
# Audit and citation data items may have been added by the CCDC. 
# Please retain this information to preserve the provenance of 
# this file and to allow appropriate attribution of the data. 
# 
#######################################################################
data_cut95_a
_audit_creation_date               2022-12-05
_audit_creation_method
;
Olex2 1.5
(compiled 2022.04.07 svn.rca3783a0 for OlexSys, GUI svn.r6498)
;
_shelx_SHELXL_version_number       2018/3
loop_
  _audit_author_name
  _audit_author_address
 'Matthew Wallis'
;
Western Sydney University
Australia
;

_audit_contact_author_address      ?
_audit_contact_author_email        ?
_audit_contact_author_name         ''
_audit_contact_author_phone        ?
_audit_update_record
;
2022-12-05 deposited with the CCDC.	2022-12-05 downloaded from the CCDC.
;
_publ_contact_author_id_orcid      ?
_publ_section_references
;
Dolomanov, O.V., Bourhis, L.J., Gildea, R.J, Howard, J.A.K. & Puschmann, H.
 (2009), J. Appl. Cryst. 42, 339-341.

Sheldrick, G.M. (2015). Acta Cryst. C71, 3-8.
;
_chemical_name_common              ?
_chemical_name_systematic          ?
_chemical_formula_moiety          
 'C90 H65 N24 O3 Zn2, 4(B F4), 3(C2 H3 N), C4 H10 O, C2 N, 0.25(O), [+ solvents]'
_chemical_formula_sum              'C102 H84 B4 F16 N28 O4.25 Zn2'
_chemical_formula_weight           2247.95
_chemical_melting_point            ?
# end Validation Reply Form
_chemical_properties_physical      Efflorescent
loop_
  _atom_type_symbol
  _atom_type_description
  _atom_type_scat_dispersion_real
  _atom_type_scat_dispersion_imag
  _atom_type_scat_source
 C C 0.0033 0.0016 'International Tables Vol C Tables 4.2.6.8 and 6.1.1.4'
 H H 0.0000 0.0000 'International Tables Vol C Tables 4.2.6.8 and 6.1.1.4'
 B B 0.0013 0.0007 'International Tables Vol C Tables 4.2.6.8 and 6.1.1.4'
 F F 0.0171 0.0103 'International Tables Vol C Tables 4.2.6.8 and 6.1.1.4'
 N N 0.0061 0.0033 'International Tables Vol C Tables 4.2.6.8 and 6.1.1.4'
 O O 0.0106 0.0060 'International Tables Vol C Tables 4.2.6.8 and 6.1.1.4'
 Zn Zn 0.2839 1.4301 'International Tables Vol C Tables 4.2.6.8 and 6.1.1.4'

_shelx_space_group_comment
;
The symmetry employed for this shelxl refinement is uniquely defined
by the following loop, which should always be used as a source of
symmetry information in preference to the above space-group names.
They are only intended as comments.
;
_space_group_crystal_system        'triclinic'
_space_group_IT_number             2
_space_group_name_H-M_alt          'P -1'
_space_group_name_Hall             '-P 1'
loop_
  _space_group_symop_operation_xyz
 'x, y, z'
 '-x, -y, -z'

_cell_length_a                     16.120(3)
_cell_length_b                     17.850(4)
_cell_length_c                     20.560(4)
_cell_angle_alpha                  80.07(3)
_cell_angle_beta                   89.62(3)
_cell_angle_gamma                  72.86(3)
_cell_volume                       5562(2)
_cell_formula_units_Z              2
_cell_measurement_reflns_used      3015
_cell_measurement_temperature      100
_cell_measurement_theta_max        20.00
_cell_measurement_theta_min        2.49
_shelx_estimated_absorpt_T_max     0.990
_shelx_estimated_absorpt_T_min     0.903
_exptl_absorpt_coefficient_mu      0.521
_exptl_absorpt_correction_T_max    ?
_exptl_absorpt_correction_T_min    ?
_exptl_absorpt_correction_type     none
_exptl_absorpt_process_details     ?
_exptl_absorpt_special_details     ?
_exptl_crystal_colour              'clear white'
_exptl_crystal_colour_lustre       clear
_exptl_crystal_colour_modifier     ?
_exptl_crystal_colour_primary      white
_exptl_crystal_density_diffrn      1.342
_exptl_crystal_density_meas        ?
_exptl_crystal_density_method      ?
_exptl_crystal_description         plate
_exptl_crystal_F_000               2300
_exptl_crystal_preparation         ?
_exptl_crystal_recrystallization_method 
 'Vapour diffusion of diethyl ether into acetonitrile'
_exptl_crystal_size_max            0.2
_exptl_crystal_size_mid            0.2
_exptl_crystal_size_min            0.02
_exptl_transmission_factor_max     ?
_exptl_transmission_factor_min     ?
_diffrn_reflns_av_R_equivalents    0.0478
_diffrn_reflns_av_unetI/netI       0.0283
_diffrn_reflns_Laue_measured_fraction_full  0.993
_diffrn_reflns_Laue_measured_fraction_max  0.993
_diffrn_reflns_limit_h_max         16
_diffrn_reflns_limit_h_min         -16
_diffrn_reflns_limit_k_max         18
_diffrn_reflns_limit_k_min         -18
_diffrn_reflns_limit_l_max         21
_diffrn_reflns_limit_l_min         -21
_diffrn_reflns_number              88838
_diffrn_reflns_point_group_measured_fraction_full  0.993
_diffrn_reflns_point_group_measured_fraction_max  0.993
_diffrn_reflns_theta_full          21.967
_diffrn_reflns_theta_max           21.967
_diffrn_reflns_theta_min           1.007
_diffrn_ambient_temperature        100
_diffrn_detector_area_resol_mean   ?
_diffrn_measured_fraction_theta_full  0.993
_diffrn_measured_fraction_theta_max  0.993
_diffrn_measurement_device_type    'Australian Synchrotron MX1'
_diffrn_measurement_method         '\w scans'
_diffrn_radiation_type             MoK\a
_diffrn_radiation_wavelength       0.71073
_diffrn_source                     ?
_diffrn_standards_number           0
_reflns_Friedel_coverage           0.000
_reflns_Friedel_fraction_full      .
_reflns_Friedel_fraction_max       .
_reflns_number_gt                  9437
_reflns_number_total               13475
_reflns_special_details
;
 Reflections were merged by SHELXL according to the crystal
 class for the calculation of statistics and refinement.
 
 Structure factors included contributions from the .fab file.
 
 _reflns_Friedel_fraction is defined as the number of unique
 Friedel pairs measured divided by the number that would be
 possible theoretically, ignoring centric projections and
 systematic absences.
;
_reflns_threshold_expression       'I > 2\s(I)'
_computing_cell_refinement         ?
_computing_data_collection         ?
_computing_data_reduction          ?
_computing_molecular_graphics      'Olex2 1.5 (Dolomanov et al., 2009)'
_computing_publication_material    'Olex2 1.5 (Dolomanov et al., 2009)'
_computing_structure_refinement    'SHELXL 2018/3 (Sheldrick, 2015)'
_computing_structure_solution      'SHELXT 2018/2 (Sheldrick, 2018)'
_refine_diff_density_max           1.031
_refine_diff_density_min           -0.813
_refine_diff_density_rms           0.086
_refine_ls_extinction_coef         .
_refine_ls_extinction_method       none
_refine_ls_goodness_of_fit_ref     1.397
_refine_ls_hydrogen_treatment      constr
_refine_ls_matrix_type             full
_refine_ls_number_parameters       1632
_refine_ls_number_reflns           13475
_refine_ls_number_restraints       1093
_refine_ls_R_factor_all            0.1255
_refine_ls_R_factor_gt             0.0998
_refine_ls_restrained_S_all        1.359
_refine_ls_shift/su_max            0.003
_refine_ls_shift/su_mean           0.000
_refine_ls_structure_factor_coef   Fsqd
_refine_ls_weighting_details      
 'w=1/[\s^2^(Fo^2^)+(0.2000P)^2^] where P=(Fo^2^+2Fc^2^)/3'
_refine_ls_weighting_scheme        calc
_refine_ls_wR_factor_gt            0.3043
_refine_ls_wR_factor_ref           0.3389
_refine_special_details            SQUEEZE
_olex2_refinement_description
;
1. Shared sites
{F1B, F1A}
2. Others
 Fixed Sof: O1W(0.25)
 Fixed Uiso: H2A(0.105) H25A(0.109) H1A(0.119) H7B(0.108) H24B(0.105)
 H22B(0.108) H25B(0.106) H15C(0.098) H22C(0.116) H9A(0.114) H14C(0.116)
 H11B(0.112) H24A(0.111) H6A(0.107) H27B(0.111) H29A(0.118) H24C(0.12)
 H9B(0.114) H4A(0.115) H15B(0.125) H30A(0.119) H25C(0.112) H4B(0.123)
 H22A(0.116) H7A(0.11) H20A(0.114) H17B(0.123) H5A(0.133) H12B(0.127)
 H14B(0.129) H29B(0.127) H2B(0.129) H18B(0.119) H20B(0.133) H27A(0.125)
 H26B(0.121) H30B(0.146) H9C(0.127) H18A(0.119) H1B(0.128) H26A(0.147)
 H29C(0.138) H5B(0.138) H6C(0.12) H21B(0.149) H7C(0.146) H17A(0.12) H21A(0.111)
 H27C(0.148) H20C(0.141) H15A(0.152) H14A(0.147) H26C(0.164) H30C(0.162)
 H18C(0.11) H2C(0.151) H11A(0.149) H12A(0.157) H4C(0.181) H11C(0.12) H1C(0.182)
 H12C(0.137) H5C(0.213) H17C(0.105) H2SA(0.223) H2SB(0.223) H2SC(0.223)
 H21C(0.11) H1EA(0.262) H1EB(0.262) H1EC(0.262) H2EA(0.234) H2EB(0.234)
 H3EA(0.243) H3EB(0.243) H4EA(0.358) H4EB(0.358) H4EC(0.358) N1S3(0.15)
 C1S3(0.15) C2S3(0.15) H2SD(0.225) H2SE(0.225) H2SF(0.225) N1T3(0.15)
 C1T3(0.15) C2T3(0.15) H2TA(0.225) H2TB(0.225) H2TC(0.225) H17D(0.105)
 H15D(0.129) H14D(0.115) H12D(0.157) H11D(0.149) H20D(0.114) H18D(0.123)
 H21D(0.105) H20F(0.142) H18F(0.113) H17F(0.112) H21F(0.132) H15F(0.103)
 H14F(0.107) H11F(0.161) H12F(0.198) H2SG(0.201) H2SH(0.201) H2SI(0.201)
 H2TD(0.278) H2TE(0.278) H2TF(0.278)
 Fixed X: H2A(1.051052) H25A(0.144842) H1A(1.160193) H7B(1.02417)
 H24B(0.044443) H22B(0.232045) H25B(-0.017493) H15C(0.759775) H22C(0.421367)
 H9A(0.620859) H14C(0.71621) H11B(0.761615) H24A(0.109756) H6A(0.945936) H27B(-
 0.095431) H29A(0.121798) H24C(0.351371) H9B(0.893439) H4A(0.8755)
 H15B(0.738856) H30A(0.097719) H25C(0.112633) H4B(1.112751) H22A(0.156327)
 H7A(0.767237) H20A(0.145941) H17B(0.514051) H5A(0.988074) H12B(0.683699)
 H14B(0.66293) H29B(-0.15254) H2B(1.028554) H18B(0.369399) H20B(0.378824)
 H27A(0.074544) H26B(-0.242243) H30B(-0.300493) H9C(0.58407) H18A(0.30074)
 H1B(1.128907) H26A(0.044523) H29C(0.062899) H5B(1.218864) H6C(0.770797)
 H21B(0.523923) H7C(0.577185) H17A(0.341734) H21A(0.186811) H27C(0.312487)
 H20C(0.316971) H15A(0.522367) H14A(0.378881) H26C(0.261203) H30C(0.021802)
 H18C(0.500606) H2C(0.791782) H11A(0.561392) H12A(0.41596) H4C(0.528069)
 H11C(0.510299) H1C(0.7701) H12C(0.466029) H5C(0.517702) H17C(0.589494)
 H2SA(0.268493) H2SB(0.217964) H2SC(0.256253) H21C(0.407494) H1EA(1.01847)
 H1EB(0.973661) H1EC(0.917832) H2EA(0.968953) H2EB(0.878568) H3EA(0.973734)
 H3EB(0.966202) H4EA(0.812393) H4EB(0.837105) H4EC(0.825924) O1W(0.5)
 H2SD(0.57175) H2SE(0.653508) H2SF(0.561617) H2TA(0.636729) H2TB(0.734032)
 H2TC(0.714415) H17D(0.350158) H15D(0.51137) H14D(0.368951) H12D(0.424945)
 H11D(0.566708) H20D(0.145568) H18D(0.305804) H21D(0.189574) H20F(0.333468)
 H18F(0.511785) H17F(0.616103) H21F(0.436888) H15F(0.75541) H14F(0.723743)
 H11F(0.532356) H12F(0.505132) H2SG(0.038326) H2SH(0.137828) H2SI(0.106271)
 H2TD(0.197567) H2TE(0.200386) H2TF(0.111642)
 Fixed Y: H2A(0.907023) H25A(0.559842) H1A(0.968298) H7B(0.558731)
 H24B(1.006891) H22B(0.931377) H25B(0.802736) H15C(0.591625) H22C(0.593395)
 H9A(1.007114) H14C(0.505509) H11B(0.635697) H24A(0.517706) H6A(0.854568)
 H27B(1.07351) H29A(0.446824) H24C(0.627297) H9B(0.643165) H4A(1.123308)
 H15B(0.868321) H30A(0.328291) H25C(0.754296) H4B(0.473384) H22A(0.651553)
 H7A(1.06646) H20A(0.86576) H17B(0.796168) H5A(1.181207) H12B(0.668641)
 H14B(0.900866) H29B(0.866524) H2B(0.632152) H18B(0.793782) H20B(0.826136)
 H27A(0.41111) H26B(1.140109) H30B(0.94011) H9C(0.706717) H18A(0.666203)
 H1B(0.547676) H26A(0.294359) H29C(0.745022) H5B(0.39911) H6C(0.886947)
 H21B(0.825422) H7C(0.796033) H17A(0.746879) H21A(0.946194) H27C(0.675661)
 H20C(0.544993) H15A(0.918542) H14A(0.921172) H26C(0.693356) H30C(0.765153)
 H18C(0.640978) H2C(0.891982) H11A(0.858026) H12A(0.872093) H4C(0.926524)
 H11C(0.717143) H1C(0.965082) H12C(0.636233) H5C(1.001472) H17C(0.585174)
 H2SA(0.693399) H2SB(0.632409) H2SC(0.626909) H21C(0.488061) H1EA(0.785911)
 H1EB(0.767579) H1EC(0.790436) H2EA(0.884266) H2EB(0.899624) H3EA(1.021016)
 H3EB(1.039948) H4EA(1.021423) H4EB(1.090271) H4EC(1.096176) O1W(0.5)
 H2SD(1.203491) H2SE(1.172064) H2SF(1.161388) H2TA(1.199613) H2TB(1.160455)
 H2TC(1.168767) H17D(0.784976) H15D(0.93025) H14D(0.938272) H12D(0.922531)
 H11D(0.91656) H20D(0.872973) H18D(0.692458) H21D(0.96693) H20F(0.568438)
 H18F(0.626504) H17F(0.573137) H21F(0.525869) H15F(0.576655) H14F(0.490997)
 H11F(0.749215) H12F(0.667117) H2SG(1.372194) H2SH(1.369523) H2SI(1.29595)
 H2TD(1.342491) H2TE(1.252028) H2TF(1.322301)
 Fixed Z: H2A(0.086058) H25A(0.53617) H1A(0.077858) H7B(0.163066)
 H24B(0.431875) H22B(0.434305) H25B(0.446403) H15C(0.171193) H22C(0.554579)
 H9A(0.097739) H14C(0.253819) H11B(0.296387) H24A(0.354926) H6A(0.085227)
 H27B(0.404322) H29A(0.581266) H24C(0.677779) H9B(0.243382) H4A(0.077883)
 H15B(0.233232) H30A(0.624839) H25C(0.602224) H4B(0.105911) H22A(0.285376)
 H7A(0.084747) H20A(0.30521) H17B(0.326972) H5A(0.069304) H12B(0.388883)
 H14B(0.32675) H29B(0.452551) H2B(-0.062356) H18B(0.337014) H20B(0.524867)
 H27A(0.398886) H26B(0.394808) H30B(0.438105) H9C(0.025897) H18A(0.246275) H1B(-
 0.11807) H26A(0.450516) H29C(0.705463) H5B(0.047118) H6C(-0.072644)
 H21B(0.516192) H7C(-0.106611) H17A(0.156341) H21A(0.214282) H27C(0.774291)
 H20C(0.393092) H15A(0.016056) H14A(0.026119) H26C(0.877706) H30C(0.809876)
 H18C(0.442027) H2C(-0.191127) H11A(0.211707) H12A(0.222297) H4C(-0.185857)
 H11C(0.121577) H1C(-0.29903) H12C(0.207079) H5C(-0.297585) H17C(0.362134)
 H2SA(0.035854) H2SB(0.022077) H2SC(0.094947) H21C(0.313149) H1EA(0.30955)
 H1EB(0.247334) H1EC(0.309553) H2EA(0.209275) H2EB(0.243813) H3EA(0.213838)
 H3EB(0.2872) H4EA(0.24515) H4EB(0.195511) H4EC(0.272032) O1W(0) H2SD(0.224409)
 H2SE(0.276168) H2SF(0.298061) H2TA(0.205792) H2TB(0.185846) H2TC(0.261102)
 H17D(0.169613) H15D(0.022925) H14D(0.045506) H12D(0.236626) H11D(0.215014)
 H20D(0.322491) H18D(0.245449) H21D(0.246608) H20F(0.379001) H18F(0.482501)
 H17F(0.409629) H21F(0.300504) H15F(0.140808) H14F(0.232358) H11F(0.162344)
 H12F(0.25748) H2SG(0.23608) H2SH(0.244548) H2SI(0.279392) H2TD(0.241039)
 H2TE(0.267639) H2TF(0.267504)
;
_atom_sites_solution_hydrogens     geom
_atom_sites_solution_primary       ?
_atom_sites_solution_secondary     ?
loop_
  _atom_site_label
  _atom_site_type_symbol
  _atom_site_fract_x
  _atom_site_fract_y
  _atom_site_fract_z
  _atom_site_U_iso_or_equiv
  _atom_site_adp_type
  _atom_site_occupancy
  _atom_site_site_symmetry_order
  _atom_site_calc_flag
  _atom_site_refinement_flags_posn
  _atom_site_refinement_flags_adp
  _atom_site_refinement_flags_occupancy
  _atom_site_disorder_assembly
  _atom_site_disorder_group
 Zn2 Zn 0.21088(5) 0.71710(5) 0.44989(4) 0.0903(4) Uani 1 1 d . . . . .
 Zn1 Zn 0.75844(5) 0.78801(6) 0.09204(5) 0.0942(4) Uani 1 1 d . . . . .
 N7B N -0.0196(3) 0.9202(4) 0.4369(3) 0.0842(16) Uani 1 1 d . . . . .
 N7A N 0.1187(3) 0.5124(4) 0.4569(3) 0.0870(17) Uani 1 1 d . . . . .
 N3B N 0.8747(4) 0.7005(4) 0.0816(3) 0.0903(17) Uani 1 1 d . . . . .
 N6A N 0.1580(4) 0.6242(4) 0.4489(3) 0.0870(16) Uani 1 1 d . . . . .
 O1B O 0.6195(3) 0.8075(4) 0.4205(3) 0.1153(19) Uani 1 1 d . . . . .
 N2B N 0.9936(4) 0.6073(4) 0.0635(3) 0.0914(17) Uani 1 1 d . . . . .
 N6B N 0.0999(4) 0.8193(4) 0.4440(3) 0.0894(17) Uani 1 1 d . . . . .
 N2A N 0.8830(4) 0.9752(4) 0.0826(3) 0.0879(16) Uani 1 1 d . . . . .
 N3A N 0.8158(4) 0.8825(4) 0.0894(3) 0.0920(17) Uani 1 1 d . . . . .
 N5A N 0.1960(4) 0.7148(4) 0.3413(3) 0.098(2) Uani 1 1 d D . . . .
 N6C N 0.2184(4) 0.7023(4) 0.5556(3) 0.0878(17) Uani 1 1 d . . . . .
 N5C N 0.3441(4) 0.6334(4) 0.4760(3) 0.0886(16) Uiso 1 1 d D . . . .
 N3C N 0.7197(4) 0.8153(4) -0.0104(3) 0.0954(18) Uani 1 1 d D . . . .
 N7C N 0.2209(4) 0.6951(4) 0.6635(3) 0.0951(17) Uani 1 1 d . . . . .
 N5B N 0.2689(4) 0.8173(4) 0.4353(3) 0.0917(17) Uani 1 1 d . . . . .
 N1A N 1.0868(5) 1.0793(5) 0.0749(3) 0.1010(19) Uani 1 1 d . . . . .
 N4C N 0.6678(4) 0.7178(4) 0.0888(3) 0.0947(18) Uani 1 1 d D . . . .
 N4B N 0.8008(4) 0.7332(4) 0.1970(3) 0.0894(16) Uani 1 1 d . . . . .
 N4A N 0.6452(4) 0.8933(5) 0.1052(4) 0.108(2) Uani 1 1 d D . . . .
 O1A O 0.2949(6) 0.9029(8) 0.1273(6) 0.114(5) Uani 0.74(2) 1 d D . P A 1
 C3B C 1.0600(5) 0.5600(5) 0.0287(4) 0.090(2) Uani 1 1 d . . . . .
 N1B N 1.1840(5) 0.4674(5) -0.0422(4) 0.115(2) Uani 1 1 d . . . . .
 N8A N 0.0712(4) 0.2986(4) 0.5408(4) 0.108(2) Uani 1 1 d . . . . .
 N8B N -0.2861(5) 1.0474(6) 0.4137(4) 0.120(2) Uani 1 1 d . . . . .
 N2C N 0.6719(5) 0.8587(4) -0.1127(4) 0.112(2) Uiso 1 1 d D . . . .
 C28B C -0.1105(5) 0.9635(5) 0.4307(4) 0.090(2) Uani 1 1 d . . . . .
 N8C N 0.1364(6) 0.7306(5) 0.8547(4) 0.125(2) Uani 1 1 d D . . . .
 C6B C 0.9236(5) 0.6726(5) 0.0353(4) 0.091(2) Uani 1 1 d . . . . .
 C3A C 0.9519(5) 1.0099(5) 0.0805(3) 0.086(2) Uani 1 1 d . . . . .
 C23B C 0.1227(4) 0.8887(4) 0.4390(3) 0.0829(19) Uani 1 1 d . . . . .
 C8B C 0.9111(5) 0.6534(5) 0.1411(4) 0.091(2) Uani 1 1 d . . . . .
 C2A C 1.0370(5) 0.9632(5) 0.0822(4) 0.0872(19) Uani 1 1 d . . . . .
 H2A H 1.051052 0.907023 0.086058 0.105 Uiso 1 1 calc R U . . .
 C25A C 0.1415(4) 0.5653(5) 0.4894(4) 0.091(2) Uani 1 1 d . . . . .
 H25A H 0.144842 0.559842 0.536170 0.109 Uiso 1 1 calc R U . . .
 C23A C 0.1465(4) 0.6072(5) 0.3863(4) 0.089(2) Uani 1 1 d . . . . .
 C1A C 1.1017(5) 1.0005(6) 0.0783(4) 0.099(2) Uani 1 1 d . . . . .
 H1A H 1.160193 0.968298 0.077858 0.119 Uiso 1 1 calc R U . . .
 C7B C 0.9856(5) 0.5972(5) 0.1305(4) 0.090(2) Uani 1 1 d . . . . .
 H7B H 1.024170 0.558731 0.163066 0.108 Uiso 1 1 calc R U . . .
 C24B C 0.0481(4) 0.9523(5) 0.4351(4) 0.0872(19) Uani 1 1 d . . . . .
 H24B H 0.044443 1.006891 0.431875 0.105 Uiso 1 1 calc R U . . .
 C13B C 0.6660(4) 0.7876(6) 0.3650(4) 0.101(2) Uani 1 1 d D . . . .
 C8A C 0.7552(5) 0.9561(5) 0.0906(4) 0.092(2) Uani 1 1 d . . . . .
 C28A C 0.1027(4) 0.4408(5) 0.4850(4) 0.0837(19) Uani 1 1 d . . . . .
 C10B C 0.7563(4) 0.7494(5) 0.2552(4) 0.094(2) Uani 1 1 d D . . . .
 C22B C 0.2141(5) 0.8850(5) 0.4359(4) 0.090(2) Uani 1 1 d . . . . .
 H22B H 0.232045 0.931377 0.434305 0.108 Uiso 1 1 calc R U . . .
 C25B C 0.0155(5) 0.8393(5) 0.4432(4) 0.088(2) Uani 1 1 d . . . . .
 H25B H -0.017493 0.802736 0.446403 0.106 Uiso 1 1 calc R U . . .
 C15C C 0.6995(13) 0.6001(17) 0.1777(16) 0.082(8) Uani 0.47(3) 1 d D . P B 1
 H15C H 0.759775 0.591625 0.171193 0.098 Uiso 0.47(3) 1 calc R U P B 1
 C22C C 0.3643(5) 0.6236(5) 0.5380(4) 0.097(2) Uani 1 1 d . . . . .
 H22C H 0.421367 0.593395 0.554579 0.116 Uiso 1 1 calc R U . . .
 C23C C 0.3007(5) 0.6582(5) 0.5821(4) 0.090(2) Uani 1 1 d . . . . .
 C9A C 0.6648(5) 0.9579(6) 0.0981(4) 0.095(2) Uani 1 1 d . . . . .
 H9A H 0.620859 1.007114 0.097739 0.114 Uiso 1 1 calc R U . . .
 C14C C 0.6739(16) 0.5482(17) 0.2271(17) 0.097(11) Uani 0.47(3) 1 d D . P B 1
 H14C H 0.716210 0.505509 0.253819 0.116 Uiso 0.47(3) 1 calc R U P B 1
 C11B C 0.7408(4) 0.6897(5) 0.3020(3) 0.094(2) Uani 1 1 d D . . . .
 H11B H 0.761615 0.635697 0.296387 0.112 Uiso 1 1 calc R U . . .
 C24A C 0.1222(4) 0.5407(5) 0.3907(4) 0.093(2) Uani 1 1 d . . . . .
 H24A H 0.109756 0.517706 0.354926 0.111 Uiso 1 1 calc R U . . .
 C6A C 0.8922(5) 0.8948(5) 0.0857(4) 0.089(2) Uani 1 1 d . . . . .
 H6A H 0.945936 0.854568 0.085227 0.107 Uiso 1 1 calc R U . . .
 C27B C -0.1367(5) 1.0448(5) 0.4123(4) 0.093(2) Uani 1 1 d . . . . .
 H27B H -0.095431 1.073510 0.404322 0.111 Uiso 1 1 calc R U . . .
 C29A C 0.1078(5) 0.4154(5) 0.5526(4) 0.098(2) Uani 1 1 d . . . . .
 H29A H 0.121798 0.446824 0.581266 0.118 Uiso 1 1 calc R U . . .
 C19B C 0.3598(4) 0.8143(4) 0.4309(3) 0.0881(19) Uani 1 1 d D . . . .
 C24C C 0.3028(5) 0.6538(5) 0.6479(4) 0.100(2) Uani 1 1 d . . . . .
 H24C H 0.351371 0.627297 0.677779 0.120 Uiso 1 1 calc R U . . .
 C9B C 0.8698(5) 0.6735(5) 0.2015(4) 0.095(2) Uani 1 1 d . . . . .
 H9B H 0.893439 0.643165 0.243382 0.114 Uiso 1 1 calc R U . . .
 C4A C 0.9339(5) 1.0909(5) 0.0773(4) 0.096(2) Uani 1 1 d . . . . .
 H4A H 0.875500 1.123308 0.077883 0.115 Uiso 1 1 calc R U . . .
 C28C C 0.1925(5) 0.7071(5) 0.7286(4) 0.101(2) Uani 1 1 d D . . . .
 C15B C 0.7275(5) 0.8275(5) 0.2649(4) 0.104(2) Uani 1 1 d D . . . .
 H15B H 0.738856 0.868321 0.233232 0.125 Uiso 1 1 calc R U . . .
 C30A C 0.0927(5) 0.3451(5) 0.5782(4) 0.099(2) Uani 1 1 d . . . . .
 H30A H 0.097719 0.328291 0.624839 0.119 Uiso 1 1 calc R U . . .
 C19C C 0.4000(14) 0.5982(17) 0.4270(14) 0.094(7) Uani 0.47(3) 1 d D . P B 1
 C16B C 0.5325(4) 0.8078(5) 0.4215(3) 0.096(2) Uani 1 1 d D . . . .
 C25C C 0.1721(5) 0.7235(5) 0.6057(4) 0.093(2) Uani 1 1 d . . . . .
 H25C H 0.112633 0.754296 0.602224 0.112 Uiso 1 1 calc R U . . .
 C4B C 1.1162(5) 0.4909(5) 0.0599(4) 0.102(2) Uani 1 1 d . . . . .
 H4B H 1.112751 0.473384 0.105911 0.123 Uiso 1 1 calc R U . . .
 C22A C 0.1656(5) 0.6586(6) 0.3292(4) 0.097(2) Uani 1 1 d . . . . .
 H22A H 0.156327 0.651553 0.285376 0.116 Uiso 1 1 calc R U . . .
 C7A C 0.7946(5) 1.0112(5) 0.0858(3) 0.092(2) Uani 1 1 d . . . . .
 H7A H 0.767237 1.066460 0.084747 0.110 Uiso 1 1 calc R U . . .
 C20A C 0.1858(10) 0.8423(7) 0.2749(6) 0.095(4) Uani 0.74(2) 1 d D . P A 1
 H20A H 0.145941 0.865760 0.305210 0.114 Uiso 0.74(2) 1 calc R U P A 1
 C17B C 0.4868(4) 0.8012(5) 0.3678(4) 0.102(2) Uani 1 1 d D . . . .
 H17B H 0.514051 0.796168 0.326972 0.123 Uiso 1 1 calc R U . . .
 C5A C 1.0013(7) 1.1251(6) 0.0733(4) 0.111(3) Uani 1 1 d . . . . .
 H5A H 0.988074 1.181207 0.069304 0.133 Uiso 1 1 calc R U . . .
 C12B C 0.6951(5) 0.7092(6) 0.3569(4) 0.106(2) Uani 1 1 d D . . . .
 H12B H 0.683699 0.668641 0.388883 0.127 Uiso 1 1 calc R U . . .
 C14B C 0.6822(5) 0.8472(6) 0.3202(4) 0.107(2) Uani 1 1 d D . . . .
 H14B H 0.662930 0.900866 0.326750 0.129 Uiso 1 1 calc R U . . .
 C10C C 0.6400(13) 0.6635(16) 0.1381(14) 0.086(7) Uani 0.47(3) 1 d D . P B 1
 C29B C -0.1698(5) 0.9229(6) 0.4403(5) 0.106(2) Uani 1 1 d . . . . .
 H29B H -0.152540 0.866524 0.452551 0.127 Uiso 1 1 calc R U . . .
 O1C O 0.5604(13) 0.5029(8) 0.2815(9) 0.095(5) Uani 0.47(3) 1 d D . P B 1
 C19A C 0.2207(12) 0.7598(8) 0.2830(7) 0.092(4) Uani 0.74(2) 1 d D . P A 1
 C8C C 0.6548(5) 0.7816(5) -0.0223(4) 0.099(2) Uiso 1 1 d D . . . .
 C2B C 1.0659(6) 0.5832(6) -0.0392(4) 0.107(2) Uani 1 1 d . . . . .
 H2B H 1.028554 0.632152 -0.062356 0.129 Uiso 1 1 calc R U . . .
 C18B C 0.4001(4) 0.8019(5) 0.3731(4) 0.099(2) Uani 1 1 d D . . . .
 H18B H 0.369399 0.793782 0.337014 0.119 Uiso 1 1 calc R U . . .
 C20B C 0.4062(4) 0.8206(6) 0.4842(4) 0.111(3) Uani 1 1 d D . . . .
 H20B H 0.378824 0.826136 0.524867 0.133 Uiso 1 1 calc R U . . .
 C10A C 0.5555(6) 0.8907(9) 0.1129(6) 0.083(4) Uani 0.74(2) 1 d D . P A 1
 C27A C 0.0795(6) 0.3958(5) 0.4456(4) 0.104(2) Uani 1 1 d . . . . .
 H27A H 0.074544 0.411110 0.398886 0.125 Uiso 1 1 calc R U . . .
 C26B C -0.2244(5) 1.0836(6) 0.4058(4) 0.101(2) Uani 1 1 d . . . . .
 H26B H -0.242243 1.140109 0.394808 0.121 Uiso 1 1 calc R U . . .
 C30B C -0.2582(5) 0.9678(7) 0.4313(5) 0.121(3) Uani 1 1 d . . . . .
 H30B H -0.300493 0.940110 0.438105 0.146 Uiso 1 1 calc R U . . .
 C9C C 0.6286(6) 0.7301(5) 0.0323(4) 0.106(2) Uiso 1 1 d D . . . .
 H9C H 0.584070 0.706717 0.025897 0.127 Uiso 1 1 calc R U . . .
 C18A C 0.2785(14) 0.7226(10) 0.2400(8) 0.099(4) Uani 0.74(2) 1 d D . P A 1
 H18A H 0.300740 0.666203 0.246275 0.119 Uiso 0.74(2) 1 calc R U P A 1
 C1B C 1.1274(6) 0.5333(6) -0.0715(5) 0.107(2) Uani 1 1 d . . . . .
 H1B H 1.128907 0.547676 -0.118070 0.128 Uiso 1 1 calc R U . . .
 C26A C 0.0630(7) 0.3250(6) 0.4776(5) 0.123(3) Uani 1 1 d . . . . .
 H26A H 0.044523 0.294359 0.450516 0.147 Uiso 1 1 calc R U . . .
 C29C C 0.1057(5) 0.7342(6) 0.7401(4) 0.115(3) Uani 1 1 d D . . . .
 H29C H 0.062899 0.745022 0.705463 0.138 Uiso 1 1 calc R U . . .
 C5B C 1.1782(6) 0.4464(6) 0.0244(5) 0.115(3) Uani 1 1 d . . . . .
 H5B H 1.218864 0.399110 0.047118 0.138 Uiso 1 1 calc R U . . .
 C6C C 0.7289(5) 0.8588(5) -0.0661(4) 0.100(2) Uiso 1 1 d D . . . .
 H6C H 0.770797 0.886947 -0.072644 0.120 Uiso 1 1 calc R U . . .
 C16A C 0.2706(8) 0.8519(9) 0.1800(6) 0.091(4) Uani 0.74(2) 1 d D . P A 1
 C21B C 0.4928(5) 0.8189(7) 0.4795(4) 0.124(3) Uani 1 1 d D . . . .
 H21B H 0.523923 0.825422 0.516192 0.149 Uiso 1 1 calc R U . . .
 C7C C 0.6225(6) 0.8083(6) -0.0855(5) 0.122(3) Uiso 1 1 d D . . . .
 H7C H 0.577185 0.796033 -0.106611 0.146 Uiso 1 1 calc R U . . .
 C17A C 0.3029(10) 0.7704(9) 0.1872(7) 0.100(5) Uani 0.74(2) 1 d D . P A 1
 H17A H 0.341734 0.746879 0.156341 0.120 Uiso 0.74(2) 1 calc R U P A 1
 C21A C 0.2104(9) 0.8898(8) 0.2218(7) 0.093(4) Uani 0.74(2) 1 d D . P A 1
 H21A H 0.186811 0.946194 0.214282 0.111 Uiso 0.74(2) 1 calc R U P A 1
 C27C C 0.2518(6) 0.6929(6) 0.7804(4) 0.123(3) Uani 1 1 d D . . . .
 H27C H 0.312487 0.675661 0.774291 0.148 Uiso 1 1 calc R U . . .
 C13A C 0.3833(6) 0.8940(9) 0.1255(6) 0.088(4) Uani 0.74(2) 1 d D . P A 1
 C20C C 0.3724(17) 0.553(3) 0.3874(17) 0.117(10) Uani 0.47(3) 1 d D . P B 1
 H20C H 0.316971 0.544993 0.393092 0.141 Uiso 0.47(3) 1 calc R U P B 1
 C15A C 0.5011(7) 0.9077(12) 0.0587(7) 0.127(7) Uani 0.74(2) 1 d D . P A 1
 H15A H 0.522367 0.918542 0.016056 0.152 Uiso 0.74(2) 1 calc R U P A 1
 C14A C 0.4158(8) 0.9093(14) 0.0647(7) 0.123(7) Uani 0.74(2) 1 d D . P A 1
 H14A H 0.378881 0.921172 0.026119 0.147 Uiso 0.74(2) 1 calc R U P A 1
 C26C C 0.2199(7) 0.7047(7) 0.8419(5) 0.137(3) Uani 1 1 d D . . . .
 H26C H 0.261203 0.693356 0.877706 0.164 Uiso 1 1 calc R U . . .
 C30C C 0.0821(7) 0.7453(7) 0.8030(5) 0.135(3) Uani 1 1 d D . . . .
 H30C H 0.021802 0.765153 0.809876 0.162 Uiso 1 1 calc R U . . .
 C18C C 0.4811(13) 0.6098(13) 0.4161(11) 0.091(6) Uani 0.47(3) 1 d D . P B 1
 H18C H 0.500606 0.640978 0.442027 0.110 Uiso 0.47(3) 1 calc R U P B 1
 C3C C 0.6607(7) 0.9028(6) -0.1792(5) 0.120(3) Uiso 1 1 d . . . . .
 C13C C 0.5861(15) 0.5598(14) 0.2367(12) 0.104(10) Uani 0.47(3) 1 d D . P B 1
 C2C C 0.7353(7) 0.9132(6) -0.2120(5) 0.126(3) Uiso 1 1 d . . . . .
 H2C H 0.791782 0.891982 -0.191127 0.151 Uiso 1 1 calc R U . . .
 N1C N 0.6467(8) 0.9847(7) -0.3064(6) 0.162(3) Uiso 1 1 d . . . . .
 C11A C 0.5235(7) 0.8737(12) 0.1734(6) 0.124(6) Uani 0.74(2) 1 d D . P A 1
 H11A H 0.561392 0.858026 0.211707 0.149 Uiso 0.74(2) 1 calc R U P A 1
 C12A C 0.4380(7) 0.8790(12) 0.1794(6) 0.131(6) Uani 0.74(2) 1 d D . P A 1
 H12A H 0.415960 0.872093 0.222297 0.157 Uiso 0.74(2) 1 calc R U P A 1
 C4C C 0.5779(8) 0.9335(8) -0.2080(6) 0.151(4) Uiso 1 1 d . . . . .
 H4C H 0.528069 0.926524 -0.185857 0.181 Uiso 1 1 calc R U . . .
 C11C C 0.5526(12) 0.6749(13) 0.1488(12) 0.100(7) Uani 0.47(3) 1 d D . P B 1
 H11C H 0.510299 0.717143 0.121577 0.120 Uiso 0.47(3) 1 calc R U P B 1
 C1C C 0.7213(9) 0.9563(7) -0.2763(7) 0.151(4) Uiso 1 1 d . . . . .
 H1C H 0.770100 0.965082 -0.299030 0.182 Uiso 1 1 calc R U . . .
 C12C C 0.5261(13) 0.6253(12) 0.1987(13) 0.114(9) Uani 0.47(3) 1 d D . P B 1
 H12C H 0.466029 0.636233 0.207079 0.137 Uiso 0.47(3) 1 calc R U P B 1
 C5C C 0.5729(11) 0.9773(9) -0.2750(8) 0.177(5) Uiso 1 1 d . . . . .
 H5C H 0.517702 1.001472 -0.297585 0.213 Uiso 1 1 calc R U . . .
 C17C C 0.5341(15) 0.5771(12) 0.3684(12) 0.088(7) Uani 0.47(3) 1 d D . P B 1
 H17C H 0.589494 0.585174 0.362134 0.105 Uiso 0.47(3) 1 calc R U P B 1
 F14 F 0.1530(3) 1.0701(3) 0.4004(3) 0.1256(17) Uani 1 1 d D . . . .
 F13 F 0.0192(3) 1.1492(3) 0.4043(3) 0.1307(18) Uani 1 1 d D . . . .
 F15 F 0.1314(5) 1.2012(4) 0.3818(5) 0.190(3) Uani 1 1 d D . . . .
 F16 F 0.0856(5) 1.1505(7) 0.3077(3) 0.215(4) Uani 1 1 d D . . . .
 B4 B 0.0962(6) 1.1413(6) 0.3738(5) 0.123(3) Uani 1 1 d D . . . .
 N1S1 N 0.0838(6) 0.7572(5) 0.0815(5) 0.131(3) Uani 1 1 d . . . . .
 C1S1 C 0.1471(7) 0.7186(6) 0.0692(5) 0.111(3) Uani 1 1 d . . . . .
 C2S1 C 0.2293(7) 0.6632(7) 0.0543(6) 0.149(4) Uani 1 1 d . . . . .
 H2SA H 0.268493 0.693399 0.035854 0.223 Uiso 1 1 calc R U . . .
 H2SB H 0.217964 0.632409 0.022077 0.223 Uiso 1 1 calc R U . . .
 H2SC H 0.256253 0.626909 0.094947 0.223 Uiso 1 1 calc R U . . .
 B2 B 0.9129(8) 0.4577(7) 0.3083(7) 0.125(4) Uani 1 1 d . . . . .
 F5 F 0.9580(3) 0.5117(3) 0.3129(2) 0.1160(15) Uani 1 1 d . . . . .
 F7 F 0.8864(3) 0.4652(3) 0.2416(2) 0.1245(17) Uani 1 1 d . . . . .
 F6 F 0.8363(4) 0.4763(4) 0.3442(3) 0.1375(18) Uani 1 1 d . . . . .
 F8 F 0.9580(6) 0.3813(4) 0.3342(4) 0.188(3) Uani 1 1 d . . . . .
 B1A B 0.3925(10) 0.7825(10) -0.0676(10) 0.137(6) Uani 0.65(4) 1 d D . P C 1
 F1A F 0.3035(9) 0.8036(12) -0.0595(8) 0.120(5) Uani 0.65(4) 1 d D . P C 1
 F2A F 0.4185(14) 0.8509(8) -0.0820(13) 0.148(7) Uani 0.65(4) 1 d D . P C 1
 F4A F 0.4353(16) 0.7375(11) -0.0095(15) 0.208(12) Uani 0.65(4) 1 d D . P C 1
 F3A F 0.4124(14) 0.7392(9) -0.1183(13) 0.189(8) Uani 0.65(4) 1 d D . P C 1
 C16C C 0.5053(14) 0.5328(12) 0.3302(9) 0.084(6) Uani 0.47(3) 1 d D . P B 1
 C21C C 0.4260(13) 0.5196(15) 0.3393(10) 0.092(6) Uani 0.47(3) 1 d D . P B 1
 H21C H 0.407494 0.488061 0.313149 0.110 Uiso 0.47(3) 1 calc R U P B 1
 O1ET O 0.9603(7) 0.9334(6) 0.2807(5) 0.186(3) Uiso 1 1 d D . . . .
 C1ET C 0.9648(9) 0.8001(8) 0.2821(7) 0.175(5) Uiso 1 1 d D . . . .
 H1EA H 1.018470 0.785911 0.309550 0.262 Uiso 1 1 calc R U . . .
 H1EB H 0.973661 0.767579 0.247334 0.262 Uiso 1 1 calc R U . . .
 H1EC H 0.917832 0.790436 0.309553 0.262 Uiso 1 1 calc R U . . .
 C2ET C 0.9423(11) 0.8816(9) 0.2528(8) 0.195(6) Uiso 1 1 d D . . . .
 H2EA H 0.968953 0.884266 0.209275 0.234 Uiso 1 1 calc R U . . .
 H2EB H 0.878568 0.899624 0.243813 0.234 Uiso 1 1 calc R U . . .
 C3ET C 0.9427(10) 1.0149(9) 0.2552(9) 0.203(6) Uiso 1 1 d D . . . .
 H3EA H 0.973734 1.021016 0.213838 0.243 Uiso 1 1 calc R U . . .
 H3EB H 0.966202 1.039948 0.287200 0.243 Uiso 1 1 calc R U . . .
 C4ET C 0.8458(11) 1.0598(11) 0.2407(10) 0.239(8) Uiso 1 1 d D . . . .
 H4EA H 0.812393 1.021423 0.245150 0.358 Uiso 1 1 calc R U . . .
 H4EB H 0.837105 1.090271 0.195511 0.358 Uiso 1 1 calc R U . . .
 H4EC H 0.825924 1.096176 0.272032 0.358 Uiso 1 1 calc R U . . .
 N1S4 N 0.6858(11) 0.6197(14) 0.5256(10) 0.135(7) Uani 0.544(16) 1 d DG . P D
 1
 C1S4 C 0.6922(8) 0.6656(14) 0.5576(9) 0.157(10) Uani 0.544(16) 1 d DG . P D
 1
 C2S4 C 0.7002(17) 0.7231(19) 0.5975(15) 0.207(13) Uani 0.544(16) 1 d DG . P D
 1
 N1T4 N 0.6798(12) 0.5718(12) 0.5068(10) 0.117(7) Uani 0.456(16) 1 d DG . P D
 2
 C1T4 C 0.6520(10) 0.5959(9) 0.5539(9) 0.124(8) Uani 0.456(16) 1 d DG . P D 2
 C2T4 C 0.617(2) 0.6260(16) 0.6129(12) 0.179(13) Uani 0.456(16) 1 d DG . P D
 2
 O1W O 0.500000 0.500000 0.000000 0.119(5) Uiso 0.5 2 d S . P . .
 N1S3 N 0.6429(12) 1.0231(10) 0.2236(9) 0.150 Uiso 0.569(11) 1 d DG U P E 1
 C1S3 C 0.6243(8) 1.0847(9) 0.2404(6) 0.150 Uiso 0.569(11) 1 d DG U P E 1
 C2S3 C 0.6009(13) 1.1617(10) 0.2615(10) 0.150 Uiso 0.569(11) 1 d DG U P E 1
 H2SD H 0.571750 1.203491 0.224409 0.225 Uiso 0.569(11) 1 calc R U P E 1
 H2SE H 0.653508 1.172064 0.276168 0.225 Uiso 0.569(11) 1 calc R U P E 1
 H2SF H 0.561617 1.161388 0.298061 0.225 Uiso 0.569(11) 1 calc R U P E 1
 N1T3 N 0.6672(15) 1.0183(13) 0.2421(12) 0.150 Uiso 0.431(11) 1 d DG U P E 2
 C1T3 C 0.6783(11) 1.0806(12) 0.2324(8) 0.150 Uiso 0.431(11) 1 d DG U P E 2
 C2T3 C 0.6920(17) 1.1587(14) 0.2203(14) 0.150 Uiso 0.431(11) 1 d DG U P E 2
 H2TA H 0.636729 1.199613 0.205792 0.225 Uiso 0.431(11) 1 calc R U P E 2
 H2TB H 0.734032 1.160455 0.185846 0.225 Uiso 0.431(11) 1 calc R U P E 2
 H2TC H 0.714415 1.168767 0.261102 0.225 Uiso 0.431(11) 1 calc R U P E 2
 O1D O 0.2948(12) 0.941(2) 0.1511(17) 0.138(18) Uani 0.26(2) 1 d D . P A 2
 C10D C 0.5521(11) 0.923(2) 0.1165(14) 0.073(8) Uani 0.26(2) 1 d D . P A 2
 C16D C 0.2732(14) 0.8843(19) 0.2003(13) 0.071(8) Uani 0.26(2) 1 d D . P A 2
 C17D C 0.308(2) 0.8029(19) 0.2007(16) 0.088(10) Uani 0.26(2) 1 d D . P A 2
 H17D H 0.350158 0.784976 0.169613 0.105 Uiso 0.26(2) 1 calc R U P A 2
 C13D C 0.3834(13) 0.929(2) 0.1440(15) 0.080(8) Uani 0.26(2) 1 d D . P A 2
 C15D C 0.4936(15) 0.929(3) 0.0672(15) 0.108(14) Uani 0.26(2) 1 d D . P A 2
 H15D H 0.511370 0.930250 0.022925 0.129 Uiso 0.26(2) 1 calc R U P A 2
 C14D C 0.4096(16) 0.933(3) 0.0806(15) 0.095(12) Uani 0.26(2) 1 d D . P A 2
 H14D H 0.368951 0.938272 0.045506 0.115 Uiso 0.26(2) 1 calc R U P A 2
 C12D C 0.4428(15) 0.924(3) 0.1924(15) 0.131(6) Uani 0.26(2) 1 d D . P A 2
 H12D H 0.424945 0.922531 0.236626 0.157 Uiso 0.26(2) 1 calc R U P A 2
 C11D C 0.5266(15) 0.920(3) 0.1801(14) 0.124(6) Uani 0.26(2) 1 d D . P A 2
 H11D H 0.566708 0.916560 0.215014 0.149 Uiso 0.26(2) 1 calc R U P A 2
 C20D C 0.188(3) 0.8551(17) 0.292(2) 0.095(4) Uani 0.26(2) 1 d D . P A 2
 H20D H 0.145568 0.872973 0.322491 0.114 Uiso 0.26(2) 1 calc R U P A 2
 C19D C 0.223(4) 0.7734(17) 0.293(2) 0.092(4) Uani 0.26(2) 1 d D . P A 2
 C18D C 0.283(3) 0.748(2) 0.246(2) 0.102(14) Uani 0.26(2) 1 d D . P A 2
 H18D H 0.305804 0.692458 0.245449 0.123 Uiso 0.26(2) 1 calc R U P A 2
 C21D C 0.2130(19) 0.9116(18) 0.2462(15) 0.087(9) Uani 0.26(2) 1 d D . P A 2
 H21D H 0.189574 0.966930 0.246608 0.105 Uiso 0.26(2) 1 calc R U P A 2
 C19F C 0.4139(11) 0.6000(16) 0.4373(10) 0.100(8) Uani 0.53(3) 1 d D . P B 2
 C20F C 0.3910(15) 0.5711(19) 0.3840(11) 0.119(8) Uani 0.53(3) 1 d D . P B 2
 H20F H 0.333468 0.568438 0.379001 0.142 Uiso 0.53(3) 1 calc R U P B 2
 C18F C 0.4969(9) 0.6046(10) 0.4469(14) 0.094(5) Uani 0.53(3) 1 d D . P B 2
 H18F H 0.511785 0.626504 0.482501 0.113 Uiso 0.53(3) 1 calc R U P B 2
 C17F C 0.5571(11) 0.5758(10) 0.4023(13) 0.094(6) Uani 0.53(3) 1 d D . P B 2
 H17F H 0.616103 0.573137 0.409629 0.112 Uiso 0.53(3) 1 calc R U P B 2
 C16F C 0.5341(14) 0.5510(14) 0.3480(12) 0.094(7) Uani 0.53(3) 1 d D . P B 2
 C21F C 0.4516(15) 0.5457(17) 0.3374(9) 0.110(7) Uani 0.53(3) 1 d D . P B 2
 H21F H 0.436888 0.525869 0.300504 0.132 Uiso 0.53(3) 1 calc R U P B 2
 C15F C 0.7044(14) 0.5939(14) 0.1644(15) 0.086(7) Uani 0.53(3) 1 d D . P B 2
 H15F H 0.755410 0.576655 0.140808 0.103 Uiso 0.53(3) 1 calc R U P B 2
 C14F C 0.6861(14) 0.5435(14) 0.2185(14) 0.089(8) Uani 0.53(3) 1 d D . P B 2
 H14F H 0.723743 0.490997 0.232358 0.107 Uiso 0.53(3) 1 calc R U P B 2
 C10F C 0.6469(13) 0.6695(14) 0.1455(13) 0.102(10) Uani 0.53(3) 1 d D . P B 2
 O1F O 0.5984(13) 0.5199(12) 0.3063(10) 0.127(8) Uani 0.53(3) 1 d D . P B 2
 C13F C 0.6113(15) 0.5721(14) 0.2515(11) 0.110(9) Uani 0.53(3) 1 d D . P B 2
 C11F C 0.5715(13) 0.6977(15) 0.1776(13) 0.134(11) Uani 0.53(3) 1 d D . P B 2
 H11F H 0.532356 0.749215 0.162344 0.161 Uiso 0.53(3) 1 calc R U P B 2
 C12F C 0.5547(17) 0.6487(16) 0.2327(15) 0.165(15) Uani 0.53(3) 1 d D . P B 2
 H12F H 0.505132 0.667117 0.257480 0.198 Uiso 0.53(3) 1 calc R U P B 2
 F1B F 0.3068(15) 0.795(3) -0.0634(19) 0.152(13) Uani 0.35(4) 1 d D . P C 2
 B1B B 0.3889(14) 0.7886(15) -0.0395(16) 0.134(10) Uani 0.35(4) 1 d D . P C 2
 F2B F 0.406(3) 0.8609(16) -0.0561(19) 0.137(10) Uani 0.35(4) 1 d D . P C 2
 F4B F 0.394(2) 0.765(2) 0.0281(15) 0.166(11) Uani 0.35(4) 1 d D . P C 2
 F3B F 0.4500(16) 0.7325(15) -0.068(3) 0.179(13) Uani 0.35(4) 1 d D . P C 2
 B3A B 0.2362(5) 0.4885(7) 0.2314(5) 0.139(3) Uani 0.46(2) 1 d DG . P F 1
 F11A F 0.2745(9) 0.4576(13) 0.2951(6) 0.176(8) Uani 0.46(2) 1 d DG . P F 1
 F10A F 0.2701(12) 0.5492(9) 0.2014(12) 0.227(12) Uani 0.46(2) 1 d DG . P F 1
 F12A F 0.2542(9) 0.4277(10) 0.1937(8) 0.134(6) Uani 0.46(2) 1 d DG . P F 1
 F9A F 0.1460(5) 0.5195(11) 0.2352(6) 0.123(6) Uani 0.46(2) 1 d DG . P F 1
 B3B B 0.2247(8) 0.5037(8) 0.2312(6) 0.139(3) Uani 0.54(2) 1 d DG . P F 2
 F9B F 0.1454(7) 0.5645(13) 0.2244(9) 0.194(8) Uani 0.54(2) 1 d DG . P F 2
 F10B F 0.2931(7) 0.5362(10) 0.2370(13) 0.240(11) Uani 0.54(2) 1 d DG . P F 2
 F11B F 0.2253(18) 0.4473(8) 0.2880(7) 0.195(8) Uani 0.54(2) 1 d DG . P F 2
 F12B F 0.2351(14) 0.4668(15) 0.1755(7) 0.202(9) Uani 0.54(2) 1 d DG . P F 2
 N1S2 N 0.134(3) 1.272(3) 0.1348(14) 0.118(6) Uani 0.53(6) 1 d DG . P G 1
 C1S2 C 0.1184(19) 1.3014(16) 0.1817(10) 0.16(2) Uani 0.53(6) 1 d DG . P G 1
 C2S2 C 0.099(3) 1.3377(19) 0.2402(13) 0.134(10) Uani 0.53(6) 1 d DG . P G 1
 H2SG H 0.038326 1.372194 0.236080 0.201 Uiso 0.53(6) 1 calc R U P G 1
 H2SH H 0.137828 1.369523 0.244548 0.201 Uiso 0.53(6) 1 calc R U P G 1
 H2SI H 0.106271 1.295950 0.279392 0.201 Uiso 0.53(6) 1 calc R U P G 1
 N1T2 N 0.123(3) 1.290(3) 0.1246(13) 0.118(6) Uani 0.47(6) 1 d DG . P G 2
 C1T2 C 0.142(3) 1.2961(17) 0.1776(9) 0.095(10) Uani 0.47(6) 1 d DG . P G 2
 C2T2 C 0.165(5) 1.304(4) 0.2438(9) 0.19(3) Uani 0.47(6) 1 d DG . P G 2
 H2TD H 0.197567 1.342491 0.241039 0.278 Uiso 0.47(6) 1 calc R U P G 2
 H2TE H 0.200386 1.252028 0.267639 0.278 Uiso 0.47(6) 1 calc R U P G 2
 H2TF H 0.111642 1.322301 0.267504 0.278 Uiso 0.47(6) 1 calc R U P G 2

loop_
  _atom_site_aniso_label
  _atom_site_aniso_U_11
  _atom_site_aniso_U_22
  _atom_site_aniso_U_33
  _atom_site_aniso_U_23
  _atom_site_aniso_U_13
  _atom_site_aniso_U_12
 Zn2 0.0698(5) 0.0953(6) 0.0915(6) 0.0089(5) 0.0054(4) -0.0173(4)
 Zn1 0.0693(5) 0.1117(7) 0.0938(6) -0.0026(5) 0.0045(4) -0.0242(5)
 N7B 0.058(3) 0.103(5) 0.084(4) -0.005(3) 0.005(3) -0.019(3)
 N7A 0.068(3) 0.106(5) 0.078(4) -0.003(4) 0.002(3) -0.019(3)
 N3B 0.074(3) 0.107(4) 0.084(4) -0.009(4) 0.006(3) -0.023(3)
 N6A 0.073(3) 0.099(4) 0.077(4) 0.006(3) 0.003(3) -0.020(3)
 O1B 0.067(3) 0.178(6) 0.096(4) -0.036(4) 0.005(3) -0.021(3)
 N2B 0.072(3) 0.104(4) 0.091(4) -0.001(3) 0.001(3) -0.025(3)
 N6B 0.071(4) 0.105(4) 0.084(4) 0.001(3) 0.005(3) -0.022(3)
 N2A 0.075(4) 0.097(4) 0.084(4) -0.003(3) 0.004(3) -0.021(3)
 N3A 0.068(4) 0.108(5) 0.092(4) -0.012(3) 0.005(3) -0.018(3)
 N5A 0.063(3) 0.122(5) 0.083(4) 0.025(4) 0.009(3) -0.014(3)
 N6C 0.069(3) 0.088(4) 0.098(4) 0.007(3) 0.001(3) -0.024(3)
 N3C 0.076(3) 0.098(4) 0.099(4) 0.020(3) 0.001(3) -0.025(3)
 N7C 0.092(4) 0.101(4) 0.087(4) -0.007(3) 0.003(3) -0.027(3)
 N5B 0.067(3) 0.101(4) 0.092(4) 0.005(3) 0.002(3) -0.015(3)
 N1A 0.116(5) 0.116(6) 0.077(4) 0.002(4) 0.002(3) -0.055(4)
 N4C 0.070(3) 0.124(5) 0.077(4) 0.013(3) -0.001(3) -0.026(3)
 N4B 0.067(3) 0.108(4) 0.087(4) -0.010(3) -0.001(3) -0.021(3)
 N4A 0.063(4) 0.135(6) 0.114(5) 0.003(4) 0.005(3) -0.027(4)
 O1A 0.079(6) 0.138(9) 0.100(7) 0.044(7) 0.005(4) -0.030(5)
 C3B 0.072(4) 0.097(5) 0.102(6) -0.019(4) 0.016(4) -0.028(4)
 N1B 0.101(5) 0.123(6) 0.116(6) -0.017(5) 0.025(4) -0.029(4)
 N8A 0.093(4) 0.106(5) 0.110(6) 0.006(4) -0.025(4) -0.020(4)
 N8B 0.079(4) 0.143(7) 0.135(6) -0.047(5) 0.000(4) -0.018(5)
 C28B 0.076(5) 0.103(6) 0.084(5) -0.010(4) -0.003(4) -0.018(4)
 N8C 0.136(6) 0.149(7) 0.099(5) -0.019(5) 0.015(4) -0.058(5)
 C6B 0.073(4) 0.100(5) 0.096(5) -0.003(4) 0.004(4) -0.028(4)
 C3A 0.079(5) 0.104(6) 0.066(4) 0.008(4) 0.003(3) -0.027(4)
 C23B 0.074(4) 0.087(5) 0.082(4) 0.001(4) 0.001(3) -0.026(4)
 C8B 0.075(4) 0.101(5) 0.087(5) -0.005(4) -0.003(4) -0.019(4)
 C2A 0.088(5) 0.094(5) 0.079(4) 0.001(4) 0.004(3) -0.035(4)
 C25A 0.074(4) 0.101(5) 0.081(5) -0.008(5) -0.004(4) -0.004(4)
 C23A 0.063(4) 0.104(6) 0.089(5) 0.003(4) 0.006(3) -0.021(4)
 C1A 0.097(5) 0.111(6) 0.078(5) 0.013(4) -0.002(4) -0.032(5)
 C7B 0.082(5) 0.107(5) 0.077(5) -0.001(4) -0.002(3) -0.031(4)
 C24B 0.072(4) 0.097(5) 0.086(5) -0.003(4) 0.005(3) -0.023(4)
 C13B 0.055(4) 0.158(6) 0.087(5) -0.027(5) 0.003(3) -0.025(4)
 C8A 0.086(5) 0.098(5) 0.084(5) -0.003(4) 0.005(4) -0.023(5)
 C28A 0.063(4) 0.091(5) 0.088(5) 0.002(4) -0.005(3) -0.018(3)
 C10B 0.063(4) 0.123(5) 0.084(5) -0.007(4) -0.008(3) -0.015(4)
 C22B 0.072(4) 0.097(5) 0.093(5) 0.003(4) 0.004(4) -0.024(4)
 C25B 0.071(5) 0.094(5) 0.087(5) 0.006(4) 0.003(3) -0.018(4)
 C15C 0.055(9) 0.119(18) 0.074(15) -0.028(12) 0.002(8) -0.023(9)
 C22C 0.076(4) 0.104(5) 0.104(6) 0.006(5) -0.008(4) -0.028(4)
 C23C 0.083(5) 0.092(5) 0.090(5) 0.008(4) -0.003(4) -0.029(4)
 C9A 0.062(4) 0.126(7) 0.088(5) -0.003(5) 0.007(3) -0.022(4)
 C14C 0.063(10) 0.12(2) 0.10(2) -0.014(13) 0.015(12) -0.008(10)
 C11B 0.076(4) 0.118(5) 0.083(4) -0.015(4) 0.003(3) -0.025(4)
 C24A 0.069(4) 0.118(6) 0.082(5) 0.002(4) -0.001(3) -0.026(4)
 C6A 0.071(4) 0.103(6) 0.086(5) -0.001(4) 0.009(3) -0.023(4)
 C27B 0.072(4) 0.106(6) 0.092(5) -0.009(4) 0.001(4) -0.020(4)
 C29A 0.083(5) 0.112(6) 0.098(6) -0.010(5) 0.002(4) -0.033(4)
 C19B 0.065(4) 0.099(5) 0.087(4) 0.004(4) 0.003(3) -0.016(3)
 C24C 0.081(5) 0.103(6) 0.107(6) 0.004(5) -0.010(4) -0.028(4)
 C9B 0.077(5) 0.119(6) 0.085(5) -0.003(4) -0.006(4) -0.032(5)
 C4A 0.089(5) 0.104(6) 0.087(5) 0.005(4) 0.018(4) -0.032(4)
 C28C 0.110(5) 0.100(5) 0.098(5) -0.007(4) 0.003(4) -0.044(4)
 C15B 0.084(5) 0.118(5) 0.091(5) -0.005(4) 0.000(4) -0.009(4)
 C30A 0.088(5) 0.114(6) 0.091(5) 0.001(5) -0.001(4) -0.033(5)
 C19C 0.073(10) 0.083(16) 0.095(16) 0.026(11) -0.010(9) -0.002(10)
 C16B 0.059(4) 0.129(6) 0.095(5) -0.013(4) 0.007(3) -0.026(4)
 C25C 0.078(4) 0.097(5) 0.098(6) -0.003(4) -0.004(4) -0.024(4)
 C4B 0.090(5) 0.109(6) 0.100(5) -0.002(5) 0.018(4) -0.026(5)
 C22A 0.067(4) 0.127(7) 0.093(5) 0.001(5) -0.001(4) -0.033(4)
 C7A 0.078(5) 0.107(6) 0.076(4) 0.002(4) -0.005(3) -0.016(4)
 C20A 0.067(4) 0.126(6) 0.080(8) 0.012(5) -0.001(6) -0.028(5)
 C17B 0.072(4) 0.141(7) 0.089(5) -0.001(5) 0.002(3) -0.036(4)
 C5A 0.122(7) 0.113(6) 0.094(6) -0.011(5) 0.016(5) -0.034(6)
 C12B 0.085(5) 0.155(6) 0.082(5) -0.023(5) 0.008(4) -0.041(5)
 C14B 0.075(4) 0.132(6) 0.099(5) -0.019(4) 0.001(4) -0.009(4)
 C10C 0.071(9) 0.106(17) 0.082(15) -0.019(11) -0.004(8) -0.024(10)
 C29B 0.079(5) 0.111(6) 0.126(7) -0.024(5) 0.024(4) -0.025(5)
 O1C 0.071(9) 0.092(8) 0.106(10) 0.017(7) 0.016(8) -0.018(7)
 C19A 0.062(4) 0.126(6) 0.077(7) 0.005(5) -0.007(5) -0.026(5)
 C2B 0.110(6) 0.110(6) 0.099(6) -0.008(5) 0.011(5) -0.036(5)
 C18B 0.073(4) 0.132(6) 0.092(5) -0.005(4) 0.004(3) -0.040(4)
 C20B 0.069(4) 0.159(8) 0.098(5) -0.030(5) 0.011(4) -0.020(5)
 C10A 0.073(6) 0.061(10) 0.110(6) -0.008(6) 0.014(4) -0.016(5)
 C27A 0.115(6) 0.100(6) 0.092(5) -0.005(5) -0.013(4) -0.030(5)
 C26B 0.079(5) 0.113(6) 0.101(6) -0.011(5) -0.002(4) -0.017(5)
 C30B 0.067(5) 0.149(9) 0.153(9) -0.041(7) 0.013(5) -0.033(5)
 C18A 0.075(8) 0.123(9) 0.091(8) 0.008(7) 0.008(6) -0.032(8)
 C1B 0.102(6) 0.109(6) 0.098(6) -0.009(5) 0.017(5) -0.021(5)
 C26A 0.130(7) 0.119(7) 0.121(8) -0.025(6) -0.022(6) -0.036(6)
 C29C 0.096(5) 0.156(8) 0.099(5) -0.019(5) 0.009(4) -0.049(5)
 C5B 0.102(6) 0.107(6) 0.122(8) -0.009(6) 0.017(5) -0.018(5)
 C16A 0.079(7) 0.125(9) 0.066(7) 0.008(7) -0.008(5) -0.039(7)
 C21B 0.070(4) 0.194(10) 0.101(5) -0.043(6) -0.001(4) -0.017(5)
 C17A 0.079(7) 0.122(8) 0.088(8) 0.008(7) 0.006(6) -0.027(7)
 C21A 0.076(7) 0.115(8) 0.082(9) 0.004(6) -0.003(6) -0.033(6)
 C27C 0.111(6) 0.156(8) 0.106(5) -0.023(6) -0.003(4) -0.046(6)
 C13A 0.057(5) 0.099(11) 0.097(7) 0.017(7) 0.006(4) -0.025(5)
 C20C 0.050(10) 0.18(3) 0.116(17) -0.029(17) 0.014(9) -0.019(12)
 C15A 0.069(6) 0.164(15) 0.106(8) 0.061(10) 0.005(6) -0.020(8)
 C14A 0.070(6) 0.178(19) 0.089(7) 0.020(10) 0.000(5) -0.015(8)
 C26C 0.135(6) 0.185(10) 0.101(6) -0.018(6) 0.004(5) -0.067(7)
 C30C 0.122(7) 0.181(10) 0.107(6) -0.028(6) 0.013(5) -0.053(7)
 C18C 0.090(12) 0.100(13) 0.069(12) 0.016(10) -0.005(9) -0.022(9)
 C13C 0.058(10) 0.110(14) 0.118(17) 0.011(11) 0.009(10) -0.005(9)
 C11A 0.088(5) 0.194(18) 0.102(6) -0.038(9) 0.010(4) -0.054(8)
 C12A 0.088(5) 0.222(19) 0.097(6) -0.044(9) 0.022(5) -0.059(8)
 C11C 0.077(9) 0.106(13) 0.097(15) 0.006(10) 0.016(9) -0.009(9)
 C12C 0.083(10) 0.111(14) 0.115(17) 0.026(11) 0.014(10) -0.004(9)
 C17C 0.075(12) 0.103(16) 0.083(15) 0.004(11) -0.005(9) -0.034(10)
 F14 0.109(3) 0.108(3) 0.144(4) 0.015(3) 0.022(3) -0.029(3)
 F13 0.110(3) 0.122(4) 0.135(4) 0.012(3) 0.024(3) -0.016(3)
 F15 0.197(7) 0.117(4) 0.258(9) -0.031(5) 0.078(6) -0.055(4)
 F16 0.136(5) 0.347(12) 0.111(4) -0.008(5) 0.005(4) -0.013(6)
 B4 0.103(6) 0.132(7) 0.114(6) -0.010(6) 0.007(5) -0.011(5)
 N1S1 0.092(5) 0.121(6) 0.175(8) -0.016(5) 0.010(5) -0.028(5)
 C1S1 0.096(6) 0.110(6) 0.118(7) 0.000(5) 0.007(5) -0.031(5)
 C2S1 0.117(8) 0.158(9) 0.182(11) -0.052(8) 0.048(7) -0.048(7)
 B2 0.110(8) 0.099(7) 0.139(10) -0.022(7) -0.039(8) 0.011(6)
 F5 0.099(3) 0.133(4) 0.111(3) 0.000(3) -0.007(2) -0.039(3)
 F7 0.094(3) 0.163(5) 0.097(3) -0.021(3) -0.017(2) -0.010(3)
 F6 0.143(5) 0.172(5) 0.115(4) -0.027(4) 0.010(3) -0.072(4)
 F8 0.229(7) 0.127(5) 0.176(6) -0.016(4) -0.105(6) -0.009(5)
 B1A 0.115(10) 0.110(12) 0.162(14) 0.012(8) -0.053(10) -0.014(10)
 F1A 0.123(9) 0.103(9) 0.116(9) 0.000(7) -0.014(7) -0.018(6)
 F2A 0.115(9) 0.118(7) 0.191(17) 0.002(8) -0.011(10) -0.020(6)
 F4A 0.21(2) 0.144(12) 0.23(2) 0.062(14) -0.129(18) -0.048(13)
 F3A 0.162(13) 0.156(10) 0.247(18) -0.065(11) 0.032(13) -0.030(9)
 C16C 0.050(10) 0.112(13) 0.087(11) -0.005(8) 0.005(8) -0.028(10)
 C21C 0.059(9) 0.111(14) 0.103(12) 0.000(10) 0.011(8) -0.033(8)
 N1S4 0.077(10) 0.16(2) 0.139(17) 0.020(12) -0.001(11) -0.022(13)
 C1S4 0.093(13) 0.17(3) 0.18(3) -0.003(14) -0.011(15) -0.026(14)
 C2S4 0.16(2) 0.27(4) 0.19(3) -0.04(2) -0.041(18) -0.06(2)
 N1T4 0.063(9) 0.143(18) 0.119(12) 0.043(11) -0.013(8) -0.027(11)
 C1T4 0.090(15) 0.132(18) 0.130(14) 0.034(12) -0.008(11) -0.031(12)
 C2T4 0.21(3) 0.14(2) 0.17(2) -0.034(18) -0.01(2) -0.03(2)
 O1D 0.047(12) 0.21(4) 0.10(2) 0.05(2) 0.003(11) 0.004(16)
 C10D 0.065(12) 0.04(2) 0.106(10) -0.019(13) 0.016(8) -0.006(12)
 C16D 0.028(11) 0.120(17) 0.062(14) 0.011(13) -0.018(9) -0.034(11)
 C17D 0.053(16) 0.120(19) 0.08(2) 0.007(16) 0.007(14) -0.030(16)
 C13D 0.060(12) 0.07(2) 0.092(13) 0.014(14) 0.011(8) -0.013(12)
 C15D 0.069(15) 0.14(4) 0.091(13) 0.01(2) 0.010(11) -0.021(18)
 C14D 0.061(13) 0.12(3) 0.090(13) -0.014(18) 0.005(11) -0.004(15)
 C12D 0.088(5) 0.222(19) 0.097(6) -0.044(9) 0.022(5) -0.059(8)
 C11D 0.088(5) 0.194(18) 0.102(6) -0.038(9) 0.010(4) -0.054(8)
 C20D 0.067(4) 0.126(6) 0.080(8) 0.012(5) -0.001(6) -0.028(5)
 C19D 0.062(4) 0.126(6) 0.077(7) 0.005(5) -0.007(5) -0.026(5)
 C18D 0.049(18) 0.116(17) 0.11(2) 0.037(16) 0.010(16) -0.001(16)
 C21D 0.065(15) 0.130(15) 0.063(17) 0.001(13) -0.007(12) -0.033(13)
 C19F 0.061(8) 0.13(2) 0.080(12) 0.029(11) 0.020(9) -0.009(10)
 C20F 0.061(11) 0.17(2) 0.078(11) 0.023(11) 0.001(8) 0.004(11)
 C18F 0.072(8) 0.081(10) 0.106(14) 0.032(10) 0.008(8) -0.014(7)
 C17F 0.057(8) 0.081(9) 0.122(14) 0.021(9) 0.004(8) -0.011(7)
 C16F 0.068(10) 0.081(13) 0.116(14) 0.017(10) 0.014(9) -0.015(9)
 C21F 0.065(12) 0.153(19) 0.098(10) 0.004(10) 0.015(9) -0.026(11)
 C15F 0.118(14) 0.082(11) 0.061(11) -0.019(9) 0.025(8) -0.030(9)
 C14F 0.103(13) 0.088(13) 0.065(11) -0.004(9) 0.018(11) -0.017(9)
 C10F 0.092(13) 0.114(15) 0.075(14) 0.024(13) 0.005(10) -0.018(11)
 O1F 0.080(10) 0.126(11) 0.124(12) 0.043(9) 0.029(9) 0.011(8)
 C13F 0.077(13) 0.132(14) 0.098(13) 0.018(11) 0.017(11) -0.021(10)
 C11F 0.083(11) 0.152(18) 0.122(17) 0.050(14) 0.019(11) -0.009(11)
 C12F 0.109(16) 0.17(2) 0.13(2) 0.067(17) 0.046(14) 0.022(14)
 F1B 0.089(14) 0.15(3) 0.22(3) -0.05(2) -0.014(15) -0.033(14)
 B1B 0.087(17) 0.126(17) 0.19(2) -0.01(2) -0.007(16) -0.043(14)
 F2B 0.108(14) 0.137(14) 0.17(2) -0.020(13) 0.031(14) -0.050(12)
 F4B 0.152(19) 0.17(2) 0.190(19) 0.000(16) -0.016(16) -0.092(17)
 F3B 0.114(15) 0.154(17) 0.25(3) -0.04(2) -0.01(2) -0.009(13)
 B3A 0.112(6) 0.173(11) 0.140(7) -0.025(6) -0.019(7) -0.054(7)
 F11A 0.090(9) 0.30(2) 0.144(9) -0.082(10) -0.010(7) -0.040(11)
 F10A 0.096(11) 0.142(11) 0.42(3) 0.010(16) 0.006(16) -0.035(10)
 F12A 0.114(9) 0.163(13) 0.136(11) -0.017(9) 0.013(8) -0.066(9)
 F9A 0.108(6) 0.182(15) 0.092(8) -0.027(8) -0.001(6) -0.063(7)
 B3B 0.112(6) 0.173(11) 0.140(7) -0.025(6) -0.019(7) -0.054(7)
 F9B 0.132(8) 0.203(17) 0.235(19) -0.022(12) -0.087(10) -0.038(8)
 F10B 0.116(9) 0.132(11) 0.45(3) 0.001(13) -0.144(14) -0.022(7)
 F11B 0.25(2) 0.172(12) 0.137(9) -0.005(8) -0.047(12) -0.035(12)
 F12B 0.24(2) 0.26(2) 0.128(10) -0.040(13) -0.006(11) -0.094(16)
 N1S2 0.101(11) 0.099(16) 0.114(12) 0.030(10) 0.017(8) 0.004(12)
 C1S2 0.110(18) 0.14(2) 0.22(5) 0.00(2) 0.08(2) -0.040(15)
 C2S2 0.14(2) 0.16(2) 0.131(18) -0.042(15) 0.049(15) -0.072(18)
 N1T2 0.101(11) 0.099(16) 0.114(12) 0.030(10) 0.017(8) 0.004(12)
 C1T2 0.16(3) 0.108(17) 0.026(11) -0.001(9) 0.003(10) -0.053(14)
 C2T2 0.26(6) 0.28(6) 0.096(17) -0.04(2) 0.02(2) -0.19(6)

_geom_special_details
;
 All esds (except the esd in the dihedral angle between two l.s. planes)
 are estimated using the full covariance matrix.  The cell esds are taken
 into account individually in the estimation of esds in distances, angles
 and torsion angles; correlations between esds in cell parameters are only
 used when they are defined by crystal symmetry.  An approximate (isotropic)
 treatment of cell esds is used for estimating esds involving l.s. planes.
;
loop_
  _geom_bond_atom_site_label_1
  _geom_bond_atom_site_label_2
  _geom_bond_distance
  _geom_bond_site_symmetry_2
  _geom_bond_publ_flag
 Zn2 N6A 2.078(7) . ?
 Zn2 N6B 2.133(6) . ?
 Zn2 N5A 2.255(7) . ?
 Zn2 N6C 2.144(7) . ?
 Zn2 N5C 2.232(6) . ?
 Zn2 N5B 2.227(7) . ?
 Zn1 N3B 2.094(6) . ?
 Zn1 N3A 2.143(7) . ?
 Zn1 N3C 2.133(6) . ?
 Zn1 N4C 2.196(7) . ?
 Zn1 N4B 2.232(6) . ?
 Zn1 N4A 2.255(7) . ?
 N7B C28B 1.436(9) . ?
 N7B C24B 1.371(9) . ?
 N7B C25B 1.369(10) . ?
 N7A C25A 1.377(10) . ?
 N7A C28A 1.404(10) . ?
 N7A C24A 1.375(9) . ?
 N3B C6B 1.303(10) . ?
 N3B C8B 1.383(9) . ?
 N6A C25A 1.316(10) . ?
 N6A C23A 1.398(10) . ?
 O1B C13B 1.401(9) . ?
 O1B C16B 1.401(8) . ?
 N2B C3B 1.427(10) . ?
 N2B C6B 1.403(9) . ?
 N2B C7B 1.369(9) . ?
 N6B C23B 1.380(9) . ?
 N6B C25B 1.301(9) . ?
 N2A C3A 1.420(10) . ?
 N2A C6A 1.388(10) . ?
 N2A C7A 1.386(9) . ?
 N3A C8A 1.390(10) . ?
 N3A C6A 1.312(9) . ?
 N5A C22A 1.298(11) . ?
 N5A C19A 1.446(11) . ?
 N5A C19D 1.474(17) . ?
 N6C C23C 1.385(9) . ?
 N6C C25C 1.312(10) . ?
 N5C C22C 1.285(10) . ?
 N5C C19C 1.448(15) . ?
 N5C C19F 1.419(14) . ?
 N3C C8C 1.393(9) . ?
 N3C C6C 1.301(9) . ?
 N7C C24C 1.376(10) . ?
 N7C C28C 1.442(10) . ?
 N7C C25C 1.363(10) . ?
 N5B C22B 1.272(10) . ?
 N5B C19B 1.453(9) . ?
 N1A C1A 1.345(11) . ?
 N1A C5A 1.376(11) . ?
 N4C C10C 1.441(15) . ?
 N4C C9C 1.281(9) . ?
 N4C C10F 1.426(13) . ?
 N4B C10B 1.421(10) . ?
 N4B C9B 1.284(10) . ?
 N4A C9A 1.268(11) . ?
 N4A C10A 1.467(12) . ?
 N4A C10D 1.467(17) . ?
 O1A C16A 1.421(13) . ?
 O1A C13A 1.387(11) . ?
 C3B C4B 1.352(11) . ?
 C3B C2B 1.397(12) . ?
 N1B C1B 1.307(11) . ?
 N1B C5B 1.366(12) . ?
 N8A C30A 1.340(11) . ?
 N8A C26A 1.296(12) . ?
 N8B C26B 1.331(11) . ?
 N8B C30B 1.342(13) . ?
 N2C C6C 1.333(10) . ?
 N2C C7C 1.412(10) . ?
 N2C C3C 1.440(12) . ?
 C28B C27B 1.370(11) . ?
 C28B C29B 1.355(11) . ?
 N8C C26C 1.329(11) . ?
 N8C C30C 1.321(11) . ?
 C3A C2A 1.375(10) . ?
 C3A C4A 1.379(11) . ?
 C23B C24B 1.380(10) . ?
 C23B C22B 1.456(10) . ?
 C8B C7B 1.362(11) . ?
 C8B C9B 1.455(11) . ?
 C2A H2A 0.9500 . ?
 C2A C1A 1.388(11) . ?
 C25A H25A 0.9500 . ?
 C23A C24A 1.345(11) . ?
 C23A C22A 1.450(11) . ?
 C1A H1A 0.9500 . ?
 C7B H7B 0.9500 . ?
 C24B H24B 0.9500 . ?
 C13B C12B 1.378(10) . ?
 C13B C14B 1.368(10) . ?
 C8A C9A 1.456(11) . ?
 C8A C7A 1.310(11) . ?
 C28A C29A 1.381(11) . ?
 C28A C27A 1.358(11) . ?
 C10B C11B 1.386(9) . ?
 C10B C15B 1.383(10) . ?
 C22B H22B 0.9500 . ?
 C25B H25B 0.9500 . ?
 C15C H15C 0.9500 . ?
 C15C C14C 1.398(13) . ?
 C15C C10C 1.385(13) . ?
 C22C H22C 0.9500 . ?
 C22C C23C 1.437(11) . ?
 C23C C24C 1.341(11) . ?
 C9A H9A 0.9500 . ?
 C14C H14C 0.9500 . ?
 C14C C13C 1.387(14) . ?
 C11B H11B 0.9500 . ?
 C11B C12B 1.382(9) . ?
 C24A H24A 0.9500 . ?
 C6A H6A 0.9500 . ?
 C27B H27B 0.9500 . ?
 C27B C26B 1.375(11) . ?
 C29A H29A 0.9500 . ?
 C29A C30A 1.364(12) . ?
 C19B C18B 1.370(9) . ?
 C19B C20B 1.369(9) . ?
 C24C H24C 0.9500 . ?
 C9B H9B 0.9500 . ?
 C4A H4A 0.9500 . ?
 C4A C5A 1.390(12) . ?
 C28C C29C 1.373(10) . ?
 C28C C27C 1.373(10) . ?
 C15B H15B 0.9500 . ?
 C15B C14B 1.385(9) . ?
 C30A H30A 0.9500 . ?
 C19C C20C 1.397(14) . ?
 C19C C18C 1.392(13) . ?
 C16B C17B 1.373(9) . ?
 C16B C21B 1.367(9) . ?
 C25C H25C 0.9500 . ?
 C4B H4B 0.9500 . ?
 C4B C5B 1.374(12) . ?
 C22A H22A 0.9500 . ?
 C7A H7A 0.9500 . ?
 C20A H20A 0.9500 . ?
 C20A C19A 1.393(11) . ?
 C20A C21A 1.395(11) . ?
 C17B H17B 0.9500 . ?
 C17B C18B 1.397(8) . ?
 C5A H5A 0.9500 . ?
 C12B H12B 0.9500 . ?
 C14B H14B 0.9500 . ?
 C10C C11C 1.384(14) . ?
 C29B H29B 0.9500 . ?
 C29B C30B 1.409(12) . ?
 O1C C13C 1.404(16) . ?
 O1C C16C 1.404(17) . ?
 C19A C18A 1.385(11) . ?
 C8C C9C 1.467(10) . ?
 C8C C7C 1.354(11) . ?
 C2B H2B 0.9500 . ?
 C2B C1B 1.376(12) . ?
 C18B H18B 0.9500 . ?
 C20B H20B 0.9500 . ?
 C20B C21B 1.391(9) . ?
 C10A C15A 1.356(11) . ?
 C10A C11A 1.363(11) . ?
 C27A H27A 0.9500 . ?
 C27A C26A 1.418(13) . ?
 C26B H26B 0.9500 . ?
 C30B H30B 0.9500 . ?
 C9C H9C 0.9500 . ?
 C18A H18A 0.9500 . ?
 C18A C17A 1.390(11) . ?
 C1B H1B 0.9500 . ?
 C26A H26A 0.9500 . ?
 C29C H29C 0.9500 . ?
 C29C C30C 1.376(11) . ?
 C5B H5B 0.9500 . ?
 C6C H6C 0.9500 . ?
 C16A C17A 1.375(12) . ?
 C16A C21A 1.392(11) . ?
 C21B H21B 0.9500 . ?
 C7C H7C 0.9500 . ?
 C17A H17A 0.9500 . ?
 C21A H21A 0.9500 . ?
 C27C H27C 0.9500 . ?
 C27C C26C 1.387(11) . ?
 C13A C14A 1.366(11) . ?
 C13A C12A 1.361(11) . ?
 C20C H20C 0.9500 . ?
 C20C C21C 1.404(13) . ?
 C15A H15A 0.9500 . ?
 C15A C14A 1.372(11) . ?
 C14A H14A 0.9500 . ?
 C26C H26C 0.9500 . ?
 C30C H30C 0.9500 . ?
 C18C H18C 0.9500 . ?
 C18C C17C 1.388(14) . ?
 C3C C2C 1.418(13) . ?
 C3C C4C 1.379(15) . ?
 C13C C12C 1.395(13) . ?
 C2C H2C 0.9500 . ?
 C2C C1C 1.395(15) . ?
 N1C C1C 1.276(15) . ?
 N1C C5C 1.381(16) . ?
 C11A H11A 0.9500 . ?
 C11A C12A 1.360(11) . ?
 C12A H12A 0.9500 . ?
 C4C H4C 0.9500 . ?
 C4C C5C 1.451(18) . ?
 C11C H11C 0.9500 . ?
 C11C C12C 1.386(13) . ?
 C1C H1C 0.9500 . ?
 C12C H12C 0.9500 . ?
 C5C H5C 0.9500 . ?
 C17C H17C 0.9500 . ?
 C17C C16C 1.376(14) . ?
 F14 B4 1.354(9) . ?
 F13 B4 1.368(9) . ?
 F15 B4 1.383(11) . ?
 F16 B4 1.345(10) . ?
 N1S1 C1S1 1.107(11) . ?
 C1S1 C2S1 1.467(14) . ?
 C2S1 H2SA 0.9800 . ?
 C2S1 H2SB 0.9800 . ?
 C2S1 H2SC 0.9800 . ?
 B2 F5 1.382(14) . ?
 B2 F7 1.411(13) . ?
 B2 F6 1.416(14) . ?
 B2 F8 1.358(12) . ?
 B1A F1A 1.387(13) . ?
 B1A F2A 1.389(13) . ?
 B1A F4A 1.379(12) . ?
 B1A F3A 1.383(13) . ?
 C16C C21C 1.371(13) . ?
 C21C H21C 0.9500 . ?
 O1ET C2ET 1.271(13) . ?
 O1ET C3ET 1.402(13) . ?
 C1ET H1EA 0.9800 . ?
 C1ET H1EB 0.9800 . ?
 C1ET H1EC 0.9800 . ?
 C1ET C2ET 1.413(14) . ?
 C2ET H2EA 0.9900 . ?
 C2ET H2EB 0.9900 . ?
 C3ET H3EA 0.9900 . ?
 C3ET H3EB 0.9900 . ?
 C3ET C4ET 1.536(15) . ?
 C4ET H4EA 0.9800 . ?
 C4ET H4EB 0.9800 . ?
 C4ET H4EC 0.9800 . ?
 N1S4 C1S4 1.1623 . ?
 C1S4 C2S4 1.4534 . ?
 N1T4 C1T4 1.1618 . ?
 C1T4 C2T4 1.4546 . ?
 N1S3 C1S3 1.1625 . ?
 C1S3 C2S3 1.4553 . ?
 C2S3 H2SD 0.9800 . ?
 C2S3 H2SE 0.9800 . ?
 C2S3 H2SF 0.9800 . ?
 N1T3 C1T3 1.1605 . ?
 C1T3 C2T3 1.4553 . ?
 C2T3 H2TA 0.9800 . ?
 C2T3 H2TB 0.9800 . ?
 C2T3 H2TC 0.9800 . ?
 O1D C16D 1.421(18) . ?
 O1D C13D 1.390(17) . ?
 C10D C15D 1.357(14) . ?
 C10D C11D 1.366(14) . ?
 C16D C17D 1.393(14) . ?
 C16D C21D 1.392(14) . ?
 C17D H17D 0.9500 . ?
 C17D C18D 1.392(14) . ?
 C13D C14D 1.363(14) . ?
 C13D C12D 1.360(14) . ?
 C15D H15D 0.9500 . ?
 C15D C14D 1.365(14) . ?
 C14D H14D 0.9500 . ?
 C12D H12D 0.9500 . ?
 C12D C11D 1.360(14) . ?
 C11D H11D 0.9500 . ?
 C20D H20D 0.9500 . ?
 C20D C19D 1.395(14) . ?
 C20D C21D 1.403(14) . ?
 C19D C18D 1.393(14) . ?
 C18D H18D 0.9500 . ?
 C21D H21D 0.9500 . ?
 C19F C20F 1.384(13) . ?
 C19F C18F 1.382(13) . ?
 C20F H20F 0.9500 . ?
 C20F C21F 1.397(13) . ?
 C18F H18F 0.9500 . ?
 C18F C17F 1.381(13) . ?
 C17F H17F 0.9500 . ?
 C17F C16F 1.361(13) . ?
 C16F C21F 1.381(13) . ?
 C16F O1F 1.390(16) . ?
 C21F H21F 0.9500 . ?
 C15F H15F 0.9500 . ?
 C15F C14F 1.393(13) . ?
 C15F C10F 1.385(13) . ?
 C14F H14F 0.9500 . ?
 C14F C13F 1.385(14) . ?
 C10F C11F 1.383(13) . ?
 O1F C13F 1.389(15) . ?
 C13F C12F 1.392(13) . ?
 C11F H11F 0.9500 . ?
 C11F C12F 1.384(13) . ?
 C12F H12F 0.9500 . ?
 F1B B1B 1.384(14) . ?
 B1B F2B 1.386(14) . ?
 B1B F4B 1.376(14) . ?
 B1B F3B 1.391(14) . ?
 B3A F11A 1.4017 . ?
 B3A F10A 1.4025 . ?
 B3A F12A 1.4021 . ?
 B3A F9A 1.4017 . ?
 B3B F9B 1.4018 . ?
 B3B F10B 1.4020 . ?
 B3B F11B 1.4017 . ?
 B3B F12B 1.4030 . ?
 N1S2 C1S2 1.1625 . ?
 C1S2 C2S2 1.4533 . ?
 C2S2 H2SG 0.9800 . ?
 C2S2 H2SH 0.9800 . ?
 C2S2 H2SI 0.9800 . ?
 N1T2 C1T2 1.1625 . ?
 C1T2 C2T2 1.4535 . ?
 C2T2 H2TD 0.9800 . ?
 C2T2 H2TE 0.9800 . ?
 C2T2 H2TF 0.9800 . ?

loop_
  _geom_angle_atom_site_label_1
  _geom_angle_atom_site_label_2
  _geom_angle_atom_site_label_3
  _geom_angle
  _geom_angle_site_symmetry_1
  _geom_angle_site_symmetry_3
  _geom_angle_publ_flag
 N6A Zn2 N6B 103.8(2) . . ?
 N6A Zn2 N5A 76.4(3) . . ?
 N6A Zn2 N6C 94.4(2) . . ?
 N6A Zn2 N5C 92.4(2) . . ?
 N6A Zn2 N5B 171.7(2) . . ?
 N6B Zn2 N5A 91.9(2) . . ?
 N6B Zn2 N6C 91.1(2) . . ?
 N6B Zn2 N5C 160.9(3) . . ?
 N6B Zn2 N5B 77.1(2) . . ?
 N6C Zn2 N5A 170.8(3) . . ?
 N6C Zn2 N5C 77.3(2) . . ?
 N6C Zn2 N5B 93.8(2) . . ?
 N5C Zn2 N5A 101.9(2) . . ?
 N5B Zn2 N5A 95.3(3) . . ?
 N5B Zn2 N5C 88.4(2) . . ?
 N3B Zn1 N3A 95.6(2) . . ?
 N3B Zn1 N3C 95.1(2) . . ?
 N3B Zn1 N4C 99.0(2) . . ?
 N3B Zn1 N4B 78.0(2) . . ?
 N3B Zn1 N4A 171.9(3) . . ?
 N3A Zn1 N4C 164.7(2) . . ?
 N3A Zn1 N4B 95.0(2) . . ?
 N3A Zn1 N4A 76.4(3) . . ?
 N3C Zn1 N3A 95.6(2) . . ?
 N3C Zn1 N4C 78.5(2) . . ?
 N3C Zn1 N4B 167.9(3) . . ?
 N3C Zn1 N4A 87.1(3) . . ?
 N4C Zn1 N4B 92.6(2) . . ?
 N4C Zn1 N4A 89.1(3) . . ?
 N4B Zn1 N4A 101.1(3) . . ?
 C24B N7B C28B 126.4(7) . . ?
 C25B N7B C28B 126.2(6) . . ?
 C25B N7B C24B 107.4(6) . . ?
 C25A N7A C28A 127.5(7) . . ?
 C24A N7A C25A 105.6(7) . . ?
 C24A N7A C28A 126.6(8) . . ?
 C6B N3B Zn1 139.8(5) . . ?
 C6B N3B C8B 107.1(6) . . ?
 C8B N3B Zn1 113.0(5) . . ?
 C25A N6A Zn2 140.4(6) . . ?
 C25A N6A C23A 103.5(7) . . ?
 C23A N6A Zn2 115.1(5) . . ?
 C16B O1B C13B 118.0(6) . . ?
 C6B N2B C3B 126.4(7) . . ?
 C7B N2B C3B 126.5(6) . . ?
 C7B N2B C6B 107.0(6) . . ?
 C23B N6B Zn2 112.0(4) . . ?
 C25B N6B Zn2 141.0(6) . . ?
 C25B N6B C23B 107.0(6) . . ?
 C6A N2A C3A 125.7(6) . . ?
 C7A N2A C3A 128.8(7) . . ?
 C7A N2A C6A 105.4(6) . . ?
 C8A N3A Zn1 113.3(5) . . ?
 C6A N3A Zn1 140.2(6) . . ?
 C6A N3A C8A 106.5(7) . . ?
 C22A N5A Zn2 113.9(5) . . ?
 C22A N5A C19A 113.9(10) . . ?
 C22A N5A C19D 128(2) . . ?
 C19A N5A Zn2 132.0(9) . . ?
 C19D N5A Zn2 118(2) . . ?
 C23C N6C Zn2 112.2(5) . . ?
 C25C N6C Zn2 141.7(5) . . ?
 C25C N6C C23C 106.1(7) . . ?
 C22C N5C Zn2 111.8(5) . . ?
 C22C N5C C19C 125.8(14) . . ?
 C22C N5C C19F 114.6(11) . . ?
 C19C N5C Zn2 122.3(14) . . ?
 C19F N5C Zn2 132.7(11) . . ?
 C8C N3C Zn1 110.7(5) . . ?
 C6C N3C Zn1 142.4(6) . . ?
 C6C N3C C8C 106.4(7) . . ?
 C24C N7C C28C 126.5(7) . . ?
 C25C N7C C24C 107.0(7) . . ?
 C25C N7C C28C 126.6(7) . . ?
 C22B N5B Zn2 113.7(5) . . ?
 C22B N5B C19B 117.2(7) . . ?
 C19B N5B Zn2 128.9(5) . . ?
 C1A N1A C5A 116.9(7) . . ?
 C10C N4C Zn1 133.3(15) . . ?
 C9C N4C Zn1 113.6(5) . . ?
 C9C N4C C10C 113.1(16) . . ?
 C9C N4C C10F 122.4(16) . . ?
 C10F N4C Zn1 123.7(15) . . ?
 C10B N4B Zn1 128.5(4) . . ?
 C9B N4B Zn1 111.9(5) . . ?
 C9B N4B C10B 119.0(6) . . ?
 C9A N4A Zn1 113.0(5) . . ?
 C9A N4A C10A 122.3(9) . . ?
 C9A N4A C10D 100.3(15) . . ?
 C10A N4A Zn1 124.3(8) . . ?
 C10D N4A Zn1 146.7(15) . . ?
 C13A O1A C16A 115.0(9) . . ?
 C4B C3B N2B 121.1(7) . . ?
 C4B C3B C2B 118.8(8) . . ?
 C2B C3B N2B 120.0(7) . . ?
 C1B N1B C5B 116.7(8) . . ?
 C26A N8A C30A 116.1(8) . . ?
 C26B N8B C30B 115.9(7) . . ?
 C6C N2C C7C 108.3(8) . . ?
 C6C N2C C3C 126.5(8) . . ?
 C7C N2C C3C 125.2(8) . . ?
 C27B C28B N7B 120.1(7) . . ?
 C29B C28B N7B 119.3(7) . . ?
 C29B C28B C27B 120.5(7) . . ?
 C30C N8C C26C 114.7(9) . . ?
 N3B C6B N2B 109.8(7) . . ?
 C2A C3A N2A 120.6(7) . . ?
 C2A C3A C4A 119.4(7) . . ?
 C4A C3A N2A 120.0(7) . . ?
 N6B C23B C22B 119.2(7) . . ?
 C24B C23B N6B 109.0(6) . . ?
 C24B C23B C22B 131.7(7) . . ?
 N3B C8B C9B 118.1(7) . . ?
 C7B C8B N3B 109.8(7) . . ?
 C7B C8B C9B 131.9(7) . . ?
 C3A C2A H2A 120.9 . . ?
 C3A C2A C1A 118.2(8) . . ?
 C1A C2A H2A 120.9 . . ?
 N7A C25A H25A 123.5 . . ?
 N6A C25A N7A 112.9(7) . . ?
 N6A C25A H25A 123.5 . . ?
 N6A C23A C22A 118.0(8) . . ?
 C24A C23A N6A 111.2(7) . . ?
 C24A C23A C22A 130.7(8) . . ?
 N1A C1A C2A 124.2(8) . . ?
 N1A C1A H1A 117.9 . . ?
 C2A C1A H1A 117.9 . . ?
 N2B C7B H7B 126.9 . . ?
 C8B C7B N2B 106.2(6) . . ?
 C8B C7B H7B 126.9 . . ?
 N7B C24B C23B 105.7(7) . . ?
 N7B C24B H24B 127.1 . . ?
 C23B C24B H24B 127.1 . . ?
 C12B C13B O1B 119.9(8) . . ?
 C14B C13B O1B 118.6(8) . . ?
 C14B C13B C12B 121.5(8) . . ?
 N3A C8A C9A 117.4(8) . . ?
 C7A C8A N3A 109.8(7) . . ?
 C7A C8A C9A 132.8(8) . . ?
 C29A C28A N7A 121.4(8) . . ?
 C27A C28A N7A 120.1(7) . . ?
 C27A C28A C29A 118.5(8) . . ?
 C11B C10B N4B 122.1(7) . . ?
 C15B C10B N4B 118.4(7) . . ?
 C15B C10B C11B 119.5(8) . . ?
 N5B C22B C23B 117.5(7) . . ?
 N5B C22B H22B 121.3 . . ?
 C23B C22B H22B 121.3 . . ?
 N7B C25B H25B 124.5 . . ?
 N6B C25B N7B 110.9(7) . . ?
 N6B C25B H25B 124.5 . . ?
 C14C C15C H15C 118.9 . . ?
 C10C C15C H15C 118.9 . . ?
 C10C C15C C14C 122.1(14) . . ?
 N5C C22C H22C 119.9 . . ?
 N5C C22C C23C 120.1(7) . . ?
 C23C C22C H22C 119.9 . . ?
 N6C C23C C22C 118.0(7) . . ?
 C24C C23C N6C 109.7(7) . . ?
 C24C C23C C22C 132.2(7) . . ?
 N4A C9A C8A 119.3(8) . . ?
 N4A C9A H9A 120.3 . . ?
 C8A C9A H9A 120.3 . . ?
 C15C C14C H14C 120.3 . . ?
 C13C C14C C15C 119.4(15) . . ?
 C13C C14C H14C 120.3 . . ?
 C10B C11B H11B 120.2 . . ?
 C12B C11B C10B 119.6(8) . . ?
 C12B C11B H11B 120.2 . . ?
 N7A C24A H24A 126.7 . . ?
 C23A C24A N7A 106.7(8) . . ?
 C23A C24A H24A 126.7 . . ?
 N2A C6A H6A 124.9 . . ?
 N3A C6A N2A 110.1(7) . . ?
 N3A C6A H6A 124.9 . . ?
 C28B C27B H27B 121.0 . . ?
 C28B C27B C26B 118.1(8) . . ?
 C26B C27B H27B 121.0 . . ?
 C28A C29A H29A 120.1 . . ?
 C30A C29A C28A 119.9(8) . . ?
 C30A C29A H29A 120.1 . . ?
 C18B C19B N5B 119.1(6) . . ?
 C18B C19B C20B 119.8(7) . . ?
 C20B C19B N5B 121.0(6) . . ?
 N7C C24C H24C 126.7 . . ?
 C23C C24C N7C 106.5(7) . . ?
 C23C C24C H24C 126.7 . . ?
 N4B C9B C8B 118.7(7) . . ?
 N4B C9B H9B 120.7 . . ?
 C8B C9B H9B 120.7 . . ?
 C3A C4A H4A 120.0 . . ?
 C3A C4A C5A 119.9(8) . . ?
 C5A C4A H4A 120.0 . . ?
 C29C C28C N7C 120.8(7) . . ?
 C29C C28C C27C 118.4(8) . . ?
 C27C C28C N7C 120.8(8) . . ?
 C10B C15B H15B 119.5 . . ?
 C10B C15B C14B 121.0(8) . . ?
 C14B C15B H15B 119.5 . . ?
 N8A C30A C29A 123.2(8) . . ?
 N8A C30A H30A 118.4 . . ?
 C29A C30A H30A 118.4 . . ?
 C20C C19C N5C 120.3(15) . . ?
 C18C C19C N5C 121.9(15) . . ?
 C18C C19C C20C 117.8(15) . . ?
 C17B C16B O1B 123.6(6) . . ?
 C21B C16B O1B 115.8(6) . . ?
 C21B C16B C17B 120.6(7) . . ?
 N6C C25C N7C 110.7(7) . . ?
 N6C C25C H25C 124.7 . . ?
 N7C C25C H25C 124.7 . . ?
 C3B C4B H4B 120.4 . . ?
 C3B C4B C5B 119.3(8) . . ?
 C5B C4B H4B 120.4 . . ?
 N5A C22A C23A 116.3(8) . . ?
 N5A C22A H22A 121.8 . . ?
 C23A C22A H22A 121.8 . . ?
 N2A C7A H7A 125.9 . . ?
 C8A C7A N2A 108.2(7) . . ?
 C8A C7A H7A 125.9 . . ?
 C19A C20A H20A 120.5 . . ?
 C19A C20A C21A 119.0(10) . . ?
 C21A C20A H20A 120.5 . . ?
 C16B C17B H17B 120.1 . . ?
 C16B C17B C18B 119.9(7) . . ?
 C18B C17B H17B 120.1 . . ?
 N1A C5A C4A 121.4(9) . . ?
 N1A C5A H5A 119.3 . . ?
 C4A C5A H5A 119.3 . . ?
 C13B C12B C11B 119.8(8) . . ?
 C13B C12B H12B 120.1 . . ?
 C11B C12B H12B 120.1 . . ?
 C13B C14B C15B 118.6(9) . . ?
 C13B C14B H14B 120.7 . . ?
 C15B C14B H14B 120.7 . . ?
 C15C C10C N4C 121.3(14) . . ?
 C11C C10C N4C 120.8(14) . . ?
 C11C C10C C15C 117.9(13) . . ?
 C28B C29B H29B 121.4 . . ?
 C28B C29B C30B 117.2(9) . . ?
 C30B C29B H29B 121.4 . . ?
 C16C O1C C13C 115.6(15) . . ?
 C20A C19A N5A 115.7(9) . . ?
 C18A C19A N5A 121.5(10) . . ?
 C18A C19A C20A 122.7(9) . . ?
 N3C C8C C9C 119.1(7) . . ?
 C7C C8C N3C 110.0(7) . . ?
 C7C C8C C9C 130.7(8) . . ?
 C3B C2B H2B 121.0 . . ?
 C1B C2B C3B 118.1(8) . . ?
 C1B C2B H2B 121.0 . . ?
 C19B C18B C17B 119.5(7) . . ?
 C19B C18B H18B 120.2 . . ?
 C17B C18B H18B 120.2 . . ?
 C19B C20B H20B 119.5 . . ?
 C19B C20B C21B 120.9(7) . . ?
 C21B C20B H20B 119.5 . . ?
 C15A C10A N4A 119.8(9) . . ?
 C15A C10A C11A 118.1(10) . . ?
 C11A C10A N4A 122.0(10) . . ?
 C28A C27A H27A 121.6 . . ?
 C28A C27A C26A 116.9(8) . . ?
 C26A C27A H27A 121.6 . . ?
 N8B C26B C27B 124.5(9) . . ?
 N8B C26B H26B 117.8 . . ?
 C27B C26B H26B 117.8 . . ?
 N8B C30B C29B 123.8(9) . . ?
 N8B C30B H30B 118.1 . . ?
 C29B C30B H30B 118.1 . . ?
 N4C C9C C8C 117.6(8) . . ?
 N4C C9C H9C 121.2 . . ?
 C8C C9C H9C 121.2 . . ?
 C19A C18A H18A 121.0 . . ?
 C19A C18A C17A 118.0(11) . . ?
 C17A C18A H18A 121.0 . . ?
 N1B C1B C2B 124.2(9) . . ?
 N1B C1B H1B 117.9 . . ?
 C2B C1B H1B 117.9 . . ?
 N8A C26A C27A 125.4(9) . . ?
 N8A C26A H26A 117.3 . . ?
 C27A C26A H26A 117.3 . . ?
 C28C C29C H29C 120.7 . . ?
 C28C C29C C30C 118.5(9) . . ?
 C30C C29C H29C 120.7 . . ?
 N1B C5B C4B 122.7(8) . . ?
 N1B C5B H5B 118.6 . . ?
 C4B C5B H5B 118.6 . . ?
 N3C C6C N2C 111.2(8) . . ?
 N3C C6C H6C 124.4 . . ?
 N2C C6C H6C 124.4 . . ?
 C17A C16A O1A 121.3(10) . . ?
 C17A C16A C21A 122.9(9) . . ?
 C21A C16A O1A 115.8(11) . . ?
 C16B C21B C20B 119.1(8) . . ?
 C16B C21B H21B 120.5 . . ?
 C20B C21B H21B 120.5 . . ?
 N2C C7C H7C 128.0 . . ?
 C8C C7C N2C 103.9(8) . . ?
 C8C C7C H7C 128.0 . . ?
 C18A C17A H17A 120.2 . . ?
 C16A C17A C18A 119.6(11) . . ?
 C16A C17A H17A 120.2 . . ?
 C20A C21A H21A 121.1 . . ?
 C16A C21A C20A 117.8(10) . . ?
 C16A C21A H21A 121.1 . . ?
 C28C C27C H27C 121.1 . . ?
 C28C C27C C26C 117.7(9) . . ?
 C26C C27C H27C 121.1 . . ?
 C14A C13A O1A 117.1(9) . . ?
 C12A C13A O1A 125.0(10) . . ?
 C12A C13A C14A 117.5(9) . . ?
 C19C C20C H20C 119.8 . . ?
 C19C C20C C21C 120.5(16) . . ?
 C21C C20C H20C 119.8 . . ?
 C10A C15A H15A 119.5 . . ?
 C10A C15A C14A 121.0(10) . . ?
 C14A C15A H15A 119.5 . . ?
 C13A C14A C15A 120.8(10) . . ?
 C13A C14A H14A 119.6 . . ?
 C15A C14A H14A 119.6 . . ?
 N8C C26C C27C 125.3(10) . . ?
 N8C C26C H26C 117.3 . . ?
 C27C C26C H26C 117.3 . . ?
 N8C C30C C29C 125.3(10) . . ?
 N8C C30C H30C 117.3 . . ?
 C29C C30C H30C 117.3 . . ?
 C19C C18C H18C 119.0 . . ?
 C17C C18C C19C 121.9(17) . . ?
 C17C C18C H18C 119.0 . . ?
 C2C C3C N2C 118.5(9) . . ?
 C4C C3C N2C 118.5(10) . . ?
 C4C C3C C2C 123.0(10) . . ?
 C14C C13C O1C 119.1(14) . . ?
 C14C C13C C12C 118.7(14) . . ?
 C12C C13C O1C 122.1(15) . . ?
 C3C C2C H2C 121.7 . . ?
 C1C C2C C3C 116.5(11) . . ?
 C1C C2C H2C 121.7 . . ?
 C1C N1C C5C 120.9(13) . . ?
 C10A C11A H11A 119.6 . . ?
 C12A C11A C10A 120.7(10) . . ?
 C12A C11A H11A 119.6 . . ?
 C13A C12A C11A 121.5(10) . . ?
 C13A C12A H12A 119.3 . . ?
 C11A C12A H12A 119.3 . . ?
 C3C C4C H4C 122.7 . . ?
 C3C C4C C5C 114.6(12) . . ?
 C5C C4C H4C 122.7 . . ?
 C10C C11C H11C 119.6 . . ?
 C10C C11C C12C 120.8(14) . . ?
 C12C C11C H11C 119.6 . . ?
 C2C C1C H1C 118.2 . . ?
 N1C C1C C2C 123.7(13) . . ?
 N1C C1C H1C 118.2 . . ?
 C13C C12C H12C 119.5 . . ?
 C11C C12C C13C 121.0(15) . . ?
 C11C C12C H12C 119.5 . . ?
 N1C C5C C4C 121.2(14) . . ?
 N1C C5C H5C 119.4 . . ?
 C4C C5C H5C 119.4 . . ?
 C18C C17C H17C 120.5 . . ?
 C16C C17C C18C 119.0(18) . . ?
 C16C C17C H17C 120.5 . . ?
 F14 B4 F13 108.7(7) . . ?
 F14 B4 F15 108.9(8) . . ?
 F13 B4 F15 111.6(8) . . ?
 F16 B4 F14 112.4(8) . . ?
 F16 B4 F13 111.9(8) . . ?
 F16 B4 F15 103.2(9) . . ?
 N1S1 C1S1 C2S1 176.6(11) . . ?
 C1S1 C2S1 H2SA 109.5 . . ?
 C1S1 C2S1 H2SB 109.5 . . ?
 C1S1 C2S1 H2SC 109.5 . . ?
 H2SA C2S1 H2SB 109.5 . . ?
 H2SA C2S1 H2SC 109.5 . . ?
 H2SB C2S1 H2SC 109.5 . . ?
 F5 B2 F7 109.0(11) . . ?
 F5 B2 F6 109.6(9) . . ?
 F7 B2 F6 107.0(8) . . ?
 F8 B2 F5 113.6(9) . . ?
 F8 B2 F7 111.3(9) . . ?
 F8 B2 F6 106.1(12) . . ?
 F1A B1A F2A 109.4(12) . . ?
 F4A B1A F1A 109.3(13) . . ?
 F4A B1A F2A 108.3(13) . . ?
 F4A B1A F3A 110.0(14) . . ?
 F3A B1A F1A 109.6(13) . . ?
 F3A B1A F2A 110.2(14) . . ?
 C17C C16C O1C 116.7(15) . . ?
 C21C C16C O1C 122.2(15) . . ?
 C21C C16C C17C 121.1(16) . . ?
 C20C C21C H21C 120.1 . . ?
 C16C C21C C20C 119.7(16) . . ?
 C16C C21C H21C 120.1 . . ?
 C2ET O1ET C3ET 126.8(13) . . ?
 H1EA C1ET H1EB 109.5 . . ?
 H1EA C1ET H1EC 109.5 . . ?
 H1EB C1ET H1EC 109.5 . . ?
 C2ET C1ET H1EA 109.5 . . ?
 C2ET C1ET H1EB 109.5 . . ?
 C2ET C1ET H1EC 109.5 . . ?
 O1ET C2ET C1ET 122.5(15) . . ?
 O1ET C2ET H2EA 106.7 . . ?
 O1ET C2ET H2EB 106.7 . . ?
 C1ET C2ET H2EA 106.7 . . ?
 C1ET C2ET H2EB 106.7 . . ?
 H2EA C2ET H2EB 106.6 . . ?
 O1ET C3ET H3EA 108.7 . . ?
 O1ET C3ET H3EB 108.7 . . ?
 O1ET C3ET C4ET 114.3(14) . . ?
 H3EA C3ET H3EB 107.6 . . ?
 C4ET C3ET H3EA 108.7 . . ?
 C4ET C3ET H3EB 108.7 . . ?
 C3ET C4ET H4EA 109.5 . . ?
 C3ET C4ET H4EB 109.5 . . ?
 C3ET C4ET H4EC 109.5 . . ?
 H4EA C4ET H4EB 109.5 . . ?
 H4EA C4ET H4EC 109.5 . . ?
 H4EB C4ET H4EC 109.5 . . ?
 N1S4 C1S4 C2S4 179.9(2) . . ?
 N1T4 C1T4 C2T4 179.9(2) . . ?
 N1S3 C1S3 C2S3 179.92(12) . . ?
 C1S3 C2S3 H2SD 109.5 . . ?
 C1S3 C2S3 H2SE 109.5 . . ?
 C1S3 C2S3 H2SF 109.5 . . ?
 H2SD C2S3 H2SE 109.5 . . ?
 H2SD C2S3 H2SF 109.5 . . ?
 H2SE C2S3 H2SF 109.5 . . ?
 N1T3 C1T3 C2T3 179.8(3) . . ?
 C1T3 C2T3 H2TA 109.5 . . ?
 C1T3 C2T3 H2TB 109.5 . . ?
 C1T3 C2T3 H2TC 109.5 . . ?
 H2TA C2T3 H2TB 109.5 . . ?
 H2TA C2T3 H2TC 109.5 . . ?
 H2TB C2T3 H2TC 109.5 . . ?
 C13D O1D C16D 114.8(18) . . ?
 C15D C10D N4A 119.0(18) . . ?
 C15D C10D C11D 119.7(17) . . ?
 C11D C10D N4A 118.4(18) . . ?
 C17D C16D O1D 121(2) . . ?
 C21D C16D O1D 119(2) . . ?
 C21D C16D C17D 120.5(17) . . ?
 C16D C17D H17D 119.8 . . ?
 C18D C17D C16D 120.5(19) . . ?
 C18D C17D H17D 119.8 . . ?
 C14D C13D O1D 115.5(19) . . ?
 C12D C13D O1D 126(2) . . ?
 C12D C13D C14D 117.8(17) . . ?
 C10D C15D H15D 119.7 . . ?
 C10D C15D C14D 121(2) . . ?
 C14D C15D H15D 119.7 . . ?
 C13D C14D C15D 121(2) . . ?
 C13D C14D H14D 119.7 . . ?
 C15D C14D H14D 119.7 . . ?
 C13D C12D H12D 118.7 . . ?
 C13D C12D C11D 123(2) . . ?
 C11D C12D H12D 118.7 . . ?
 C10D C11D H11D 120.6 . . ?
 C12D C11D C10D 119(2) . . ?
 C12D C11D H11D 120.6 . . ?
 C19D C20D H20D 119.0 . . ?
 C19D C20D C21D 122(2) . . ?
 C21D C20D H20D 119.0 . . ?
 C20D C19D N5A 121.3(19) . . ?
 C18D C19D N5A 120(2) . . ?
 C18D C19D C20D 118.6(17) . . ?
 C17D C18D C19D 120.2(19) . . ?
 C17D C18D H18D 119.9 . . ?
 C19D C18D H18D 119.9 . . ?
 C16D C21D C20D 118(2) . . ?
 C16D C21D H21D 120.9 . . ?
 C20D C21D H21D 120.9 . . ?
 C20F C19F N5C 115.3(13) . . ?
 C18F C19F N5C 122.5(14) . . ?
 C18F C19F C20F 121.8(14) . . ?
 C19F C20F H20F 119.6 . . ?
 C19F C20F C21F 120.8(16) . . ?
 C21F C20F H20F 119.6 . . ?
 C19F C18F H18F 121.6 . . ?
 C17F C18F C19F 116.7(15) . . ?
 C17F C18F H18F 121.6 . . ?
 C18F C17F H17F 119.2 . . ?
 C16F C17F C18F 121.6(15) . . ?
 C16F C17F H17F 119.2 . . ?
 C17F C16F C21F 122.4(15) . . ?
 C17F C16F O1F 118.7(17) . . ?
 C21F C16F O1F 118.4(17) . . ?
 C20F C21F H21F 121.8 . . ?
 C16F C21F C20F 116.4(16) . . ?
 C16F C21F H21F 121.8 . . ?
 C14F C15F H15F 120.6 . . ?
 C10F C15F H15F 120.6 . . ?
 C10F C15F C14F 118.8(15) . . ?
 C15F C14F H14F 121.0 . . ?
 C13F C14F C15F 118.1(14) . . ?
 C13F C14F H14F 121.0 . . ?
 C15F C10F N4C 116.4(13) . . ?
 C11F C10F N4C 120.3(13) . . ?
 C11F C10F C15F 123.2(13) . . ?
 C13F O1F C16F 117.0(14) . . ?
 C14F C13F O1F 115.2(13) . . ?
 C14F C13F C12F 122.6(13) . . ?
 C12F C13F O1F 122.2(14) . . ?
 C10F C11F H11F 121.0 . . ?
 C10F C11F C12F 118.0(14) . . ?
 C12F C11F H11F 121.0 . . ?
 C13F C12F H12F 120.4 . . ?
 C11F C12F C13F 119.2(14) . . ?
 C11F C12F H12F 120.4 . . ?
 F1B B1B F2B 110.7(19) . . ?
 F1B B1B F3B 108.9(18) . . ?
 F2B B1B F3B 108.1(17) . . ?
 F4B B1B F1B 109.3(18) . . ?
 F4B B1B F2B 110.1(18) . . ?
 F4B B1B F3B 109.7(18) . . ?
 F11A B3A F10A 109.5 . . ?
 F11A B3A F12A 109.4 . . ?
 F11A B3A F9A 109.5 . . ?
 F12A B3A F10A 109.4 . . ?
 F9A B3A F10A 109.5 . . ?
 F9A B3A F12A 109.5 . . ?
 F9B B3B F10B 109.5 . . ?
 F9B B3B F12B 109.5 . . ?
 F10B B3B F12B 109.5 . . ?
 F11B B3B F9B 109.5 . . ?
 F11B B3B F10B 109.5 . . ?
 F11B B3B F12B 109.4 . . ?
 N1S2 C1S2 C2S2 179.9(3) . . ?
 C1S2 C2S2 H2SG 109.5 . . ?
 C1S2 C2S2 H2SH 109.5 . . ?
 C1S2 C2S2 H2SI 109.5 . . ?
 H2SG C2S2 H2SH 109.5 . . ?
 H2SG C2S2 H2SI 109.5 . . ?
 H2SH C2S2 H2SI 109.5 . . ?
 N1T2 C1T2 C2T2 180.0(3) . . ?
 C1T2 C2T2 H2TD 109.5 . . ?
 C1T2 C2T2 H2TE 109.5 . . ?
 C1T2 C2T2 H2TF 109.5 . . ?
 H2TD C2T2 H2TE 109.5 . . ?
 H2TD C2T2 H2TF 109.5 . . ?
 H2TE C2T2 H2TF 109.5 . . ?

loop_
  _geom_torsion_atom_site_label_1
  _geom_torsion_atom_site_label_2
  _geom_torsion_atom_site_label_3
  _geom_torsion_atom_site_label_4
  _geom_torsion
  _geom_torsion_site_symmetry_1
  _geom_torsion_site_symmetry_2
  _geom_torsion_site_symmetry_3
  _geom_torsion_site_symmetry_4
  _geom_torsion_publ_flag
 Zn2 N6A C25A N7A -168.6(5) . . . . ?
 Zn2 N6A C23A C24A 172.5(5) . . . . ?
 Zn2 N6A C23A C22A -4.7(8) . . . . ?
 Zn2 N6B C23B C24B 179.7(5) . . . . ?
 Zn2 N6B C23B C22B 2.2(8) . . . . ?
 Zn2 N6B C25B N7B -178.7(5) . . . . ?
 Zn2 N5A C22A C23A -0.1(8) . . . . ?
 Zn2 N5A C19A C20A -57.8(15) . . . . ?
 Zn2 N5A C19A C18A 119.4(11) . . . . ?
 Zn2 N5A C19D C20D -58(4) . . . . ?
 Zn2 N5A C19D C18D 126(3) . . . . ?
 Zn2 N6C C23C C22C -5.6(8) . . . . ?
 Zn2 N6C C23C C24C 177.3(5) . . . . ?
 Zn2 N6C C25C N7C -176.4(6) . . . . ?
 Zn2 N5C C22C C23C 6.1(9) . . . . ?
 Zn2 N5C C19C C20C -57(3) . . . . ?
 Zn2 N5C C19C C18C 120(2) . . . . ?
 Zn2 N5C C19F C20F -45.0(19) . . . . ?
 Zn2 N5C C19F C18F 127.4(15) . . . . ?
 Zn2 N5B C22B C23B -6.0(9) . . . . ?
 Zn2 N5B C19B C18B 77.6(8) . . . . ?
 Zn2 N5B C19B C20B -99.9(9) . . . . ?
 Zn1 N3B C6B N2B -176.6(6) . . . . ?
 Zn1 N3B C8B C7B 179.1(5) . . . . ?
 Zn1 N3B C8B C9B -4.6(9) . . . . ?
 Zn1 N3A C8A C9A 4.3(8) . . . . ?
 Zn1 N3A C8A C7A -177.1(5) . . . . ?
 Zn1 N3A C6A N2A 176.8(5) . . . . ?
 Zn1 N3C C8C C9C -4.6(9) . . . . ?
 Zn1 N3C C8C C7C 171.6(6) . . . . ?
 Zn1 N3C C6C N2C -168.3(6) . . . . ?
 Zn1 N4C C10C C15C -52(3) . . . . ?
 Zn1 N4C C10C C11C 125(2) . . . . ?
 Zn1 N4C C9C C8C 5.6(10) . . . . ?
 Zn1 N4C C10F C15F -83(2) . . . . ?
 Zn1 N4C C10F C11F 99(3) . . . . ?
 Zn1 N4B C10B C11B 126.6(6) . . . . ?
 Zn1 N4B C10B C15B -53.2(9) . . . . ?
 Zn1 N4B C9B C8B 2.9(9) . . . . ?
 Zn1 N4A C9A C8A -7.0(10) . . . . ?
 Zn1 N4A C10A C15A -90.7(12) . . . . ?
 Zn1 N4A C10A C11A 91.1(13) . . . . ?
 Zn1 N4A C10D C15D -71(3) . . . . ?
 Zn1 N4A C10D C11D 90(3) . . . . ?
 N7B C28B C27B C26B 178.8(7) . . . . ?
 N7B C28B C29B C30B -177.8(8) . . . . ?
 N7A C28A C29A C30A -179.3(7) . . . . ?
 N7A C28A C27A C26A -179.1(7) . . . . ?
 N3B C8B C7B N2B -2.5(9) . . . . ?
 N3B C8B C9B N4B 1.0(11) . . . . ?
 N6A C23A C24A N7A -1.0(8) . . . . ?
 N6A C23A C22A N5A 3.1(10) . . . . ?
 O1B C13B C12B C11B 179.9(6) . . . . ?
 O1B C13B C14B C15B -179.3(6) . . . . ?
 O1B C16B C17B C18B 179.9(8) . . . . ?
 O1B C16B C21B C20B 179.5(9) . . . . ?
 N2B C3B C4B C5B 178.9(8) . . . . ?
 N2B C3B C2B C1B -176.0(8) . . . . ?
 N6B C23B C24B N7B -0.9(8) . . . . ?
 N6B C23B C22B N5B 2.8(11) . . . . ?
 N2A C3A C2A C1A 178.3(6) . . . . ?
 N2A C3A C4A C5A -178.1(7) . . . . ?
 N3A C8A C9A N4A 2.1(11) . . . . ?
 N3A C8A C7A N2A -1.2(9) . . . . ?
 N5A C19A C18A C17A -176.2(19) . . . . ?
 N5A C19D C18D C17D 179(5) . . . . ?
 N6C C23C C24C N7C 0.4(9) . . . . ?
 N5C C22C C23C N6C -0.5(11) . . . . ?
 N5C C22C C23C C24C 175.8(8) . . . . ?
 N5C C19C C20C C21C 179(3) . . . . ?
 N5C C19C C18C C17C -179(2) . . . . ?
 N5C C19F C20F C21F 172(3) . . . . ?
 N5C C19F C18F C17F -175(2) . . . . ?
 N3C C8C C9C N4C -0.7(12) . . . . ?
 N3C C8C C7C N2C 1.4(10) . . . . ?
 N7C C28C C29C C30C -179.4(8) . . . . ?
 N7C C28C C27C C26C -179.2(8) . . . . ?
 N5B C19B C18B C17B 178.1(7) . . . . ?
 N5B C19B C20B C21B -179.0(8) . . . . ?
 N4C C10C C11C C12C -176(3) . . . . ?
 N4C C10F C11F C12F -179(3) . . . . ?
 N4B C10B C11B C12B -178.3(6) . . . . ?
 N4B C10B C15B C14B 178.8(7) . . . . ?
 N4A C10A C15A C14A -177.0(15) . . . . ?
 N4A C10A C11A C12A 173.8(14) . . . . ?
 N4A C10D C15D C14D 161(3) . . . . ?
 N4A C10D C11D C12D -160(3) . . . . ?
 O1A C16A C17A C18A 179.1(14) . . . . ?
 O1A C16A C21A C20A -178.8(12) . . . . ?
 O1A C13A C14A C15A 175.2(15) . . . . ?
 O1A C13A C12A C11A -177.7(15) . . . . ?
 C3B N2B C6B N3B 178.5(7) . . . . ?
 C3B N2B C7B C8B -177.4(7) . . . . ?
 C3B C4B C5B N1B -2.5(15) . . . . ?
 C3B C2B C1B N1B -3.8(14) . . . . ?
 N2C C3C C2C C1C -180.0(10) . . . . ?
 N2C C3C C4C C5C 179.7(10) . . . . ?
 C28B N7B C24B C23B -176.4(7) . . . . ?
 C28B N7B C25B N6B 176.5(6) . . . . ?
 C28B C27B C26B N8B -2.6(13) . . . . ?
 C28B C29B C30B N8B 0.3(15) . . . . ?
 C6B N3B C8B C7B 2.0(9) . . . . ?
 C6B N3B C8B C9B 178.2(7) . . . . ?
 C6B N2B C3B C4B -169.2(8) . . . . ?
 C6B N2B C3B C2B 8.5(12) . . . . ?
 C6B N2B C7B C8B 2.1(8) . . . . ?
 C3A N2A C6A N3A 177.8(6) . . . . ?
 C3A N2A C7A C8A -176.5(7) . . . . ?
 C3A C2A C1A N1A 2.2(11) . . . . ?
 C3A C4A C5A N1A -2.5(12) . . . . ?
 C23B N6B C25B N7B 0.7(8) . . . . ?
 C8B N3B C6B N2B -0.6(9) . . . . ?
 C2A C3A C4A C5A 2.5(11) . . . . ?
 C25A N7A C28A C29A 0.6(10) . . . . ?
 C25A N7A C28A C27A 179.0(7) . . . . ?
 C25A N7A C24A C23A 0.3(7) . . . . ?
 C25A N6A C23A C24A 1.2(8) . . . . ?
 C25A N6A C23A C22A -176.0(6) . . . . ?
 C23A N6A C25A N7A -1.0(7) . . . . ?
 C1A N1A C5A C4A 2.3(11) . . . . ?
 C7B N2B C3B C4B 10.1(12) . . . . ?
 C7B N2B C3B C2B -172.1(7) . . . . ?
 C7B N2B C6B N3B -0.9(9) . . . . ?
 C7B C8B C9B N4B 176.3(8) . . . . ?
 C24B N7B C28B C27B 9.7(11) . . . . ?
 C24B N7B C28B C29B -173.3(7) . . . . ?
 C24B N7B C25B N6B -1.2(8) . . . . ?
 C24B C23B C22B N5B -174.1(8) . . . . ?
 C13B O1B C16B C17B -9.9(11) . . . . ?
 C13B O1B C16B C21B 173.0(8) . . . . ?
 C8A N3A C6A N2A -1.6(8) . . . . ?
 C28A N7A C25A N6A 175.5(6) . . . . ?
 C28A N7A C24A C23A -174.8(6) . . . . ?
 C28A C29A C30A N8A -1.2(12) . . . . ?
 C28A C27A C26A N8A -2.5(15) . . . . ?
 C10B N4B C9B C8B 175.1(7) . . . . ?
 C10B C11B C12B C13B -0.7(10) . . . . ?
 C10B C15B C14B C13B -0.4(12) . . . . ?
 C22B N5B C19B C18B -108.1(9) . . . . ?
 C22B N5B C19B C20B 74.4(10) . . . . ?
 C22B C23B C24B N7B 176.2(8) . . . . ?
 C25B N7B C28B C27B -167.6(7) . . . . ?
 C25B N7B C28B C29B 9.5(11) . . . . ?
 C25B N7B C24B C23B 1.2(8) . . . . ?
 C25B N6B C23B C24B 0.1(8) . . . . ?
 C25B N6B C23B C22B -177.4(7) . . . . ?
 C15C C14C C13C O1C 173(3) . . . . ?
 C15C C14C C13C C12C -3(4) . . . . ?
 C15C C10C C11C C12C 1(4) . . . . ?
 C22C N5C C19C C20C 125(2) . . . . ?
 C22C N5C C19C C18C -57(3) . . . . ?
 C22C N5C C19F C20F 146.8(13) . . . . ?
 C22C N5C C19F C18F -41(2) . . . . ?
 C22C C23C C24C N7C -176.1(8) . . . . ?
 C23C N6C C25C N7C 0.2(9) . . . . ?
 C9A N4A C10A C15A 81.3(14) . . . . ?
 C9A N4A C10A C11A -97.0(13) . . . . ?
 C9A N4A C10D C15D 105(2) . . . . ?
 C9A N4A C10D C11D -94(2) . . . . ?
 C9A C8A C7A N2A 177.2(8) . . . . ?
 C14C C15C C10C N4C 178(3) . . . . ?
 C14C C15C C10C C11C 0(2) . . . . ?
 C14C C13C C12C C11C 5(4) . . . . ?
 C11B C10B C15B C14B -1.0(11) . . . . ?
 C24A N7A C25A N6A 0.5(8) . . . . ?
 C24A N7A C28A C29A 174.6(6) . . . . ?
 C24A N7A C28A C27A -7.0(10) . . . . ?
 C24A C23A C22A N5A -173.4(7) . . . . ?
 C6A N2A C3A C2A -0.8(10) . . . . ?
 C6A N2A C3A C4A 179.8(7) . . . . ?
 C6A N2A C7A C8A 0.2(8) . . . . ?
 C6A N3A C8A C9A -176.9(7) . . . . ?
 C6A N3A C8A C7A 1.8(9) . . . . ?
 C27B C28B C29B C30B -0.7(13) . . . . ?
 C29A C28A C27A C26A -0.6(12) . . . . ?
 C19B N5B C22B C23B 178.8(6) . . . . ?
 C19B C20B C21B C16B -2.5(15) . . . . ?
 C24C N7C C28C C29C -165.9(8) . . . . ?
 C24C N7C C28C C27C 15.2(12) . . . . ?
 C24C N7C C25C N6C 0.1(9) . . . . ?
 C9B N4B C10B C11B -44.1(10) . . . . ?
 C9B N4B C10B C15B 136.1(8) . . . . ?
 C9B C8B C7B N2B -178.1(8) . . . . ?
 C4A C3A C2A C1A -2.3(11) . . . . ?
 C28C N7C C24C C23C -179.4(7) . . . . ?
 C28C N7C C25C N6C 179.1(7) . . . . ?
 C28C C29C C30C N8C -1.3(16) . . . . ?
 C28C C27C C26C N8C -1.8(17) . . . . ?
 C15B C10B C11B C12B 1.6(10) . . . . ?
 C30A N8A C26A C27A 3.5(14) . . . . ?
 C19C N5C C22C C23C -176.2(14) . . . . ?
 C19C C20C C21C C16C -1(4) . . . . ?
 C19C C18C C17C C16C 0.8(19) . . . . ?
 C16B O1B C13B C12B -75.9(9) . . . . ?
 C16B O1B C13B C14B 104.7(8) . . . . ?
 C16B C17B C18B C19B 4.2(12) . . . . ?
 C25C N6C C23C C22C 176.7(7) . . . . ?
 C25C N6C C23C C24C -0.4(9) . . . . ?
 C25C N7C C24C C23C -0.3(9) . . . . ?
 C25C N7C C28C C29C 15.2(12) . . . . ?
 C25C N7C C28C C27C -163.7(8) . . . . ?
 C4B C3B C2B C1B 1.8(13) . . . . ?
 C22A N5A C19A C20A 128.2(10) . . . . ?
 C22A N5A C19A C18A -54.6(14) . . . . ?
 C22A N5A C19D C20D 125(3) . . . . ?
 C22A N5A C19D C18D -52(5) . . . . ?
 C22A C23A C24A N7A 175.8(7) . . . . ?
 C7A N2A C3A C2A 175.2(7) . . . . ?
 C7A N2A C3A C4A -4.1(11) . . . . ?
 C7A N2A C6A N3A 1.0(8) . . . . ?
 C7A C8A C9A N4A -176.1(8) . . . . ?
 C20A C19A C18A C17A 0.8(15) . . . . ?
 C17B C16B C21B C20B 2.3(13) . . . . ?
 C5A N1A C1A C2A -2.2(11) . . . . ?
 C12B C13B C14B C15B 1.3(11) . . . . ?
 C14B C13B C12B C11B -0.8(11) . . . . ?
 C10C N4C C9C C8C -177.3(14) . . . . ?
 C10C C15C C14C C13C 1(2) . . . . ?
 C10C C11C C12C C13C -4(4) . . . . ?
 C29B C28B C27B C26B 1.8(12) . . . . ?
 O1C C13C C12C C11C -172(2) . . . . ?
 O1C C16C C21C C20C -178(3) . . . . ?
 C19A N5A C22A C23A 175.0(9) . . . . ?
 C19A C20A C21A C16A -1.4(17) . . . . ?
 C19A C18A C17A C16A 1.0(19) . . . . ?
 C8C N3C C6C N2C 2.8(9) . . . . ?
 C2B C3B C4B C5B 1.1(13) . . . . ?
 C18B C19B C20B C21B 3.6(13) . . . . ?
 C20B C19B C18B C17B -4.4(12) . . . . ?
 C10A N4A C9A C8A -179.8(8) . . . . ?
 C10A C15A C14A C13A 0(2) . . . . ?
 C10A C11A C12A C13A 6(2) . . . . ?
 C27A C28A C29A C30A 2.3(11) . . . . ?
 C26B N8B C30B C29B -1.0(15) . . . . ?
 C30B N8B C26B C27B 2.1(13) . . . . ?
 C9C N4C C10C C15C 131(2) . . . . ?
 C9C N4C C10C C11C -51(4) . . . . ?
 C9C N4C C10F C15F 104(2) . . . . ?
 C9C N4C C10F C11F -74(3) . . . . ?
 C9C C8C C7C N2C 177.0(8) . . . . ?
 C1B N1B C5B C4B 0.7(14) . . . . ?
 C26A N8A C30A C29A -1.6(12) . . . . ?
 C29C C28C C27C C26C 1.9(13) . . . . ?
 C5B N1B C1B C2B 2.6(14) . . . . ?
 C6C N3C C8C C9C -178.8(7) . . . . ?
 C6C N3C C8C C7C -2.6(9) . . . . ?
 C6C N2C C7C C8C 0.3(10) . . . . ?
 C6C N2C C3C C2C 35.8(14) . . . . ?
 C6C N2C C3C C4C -143.7(10) . . . . ?
 C16A O1A C13A C14A 149.6(14) . . . . ?
 C16A O1A C13A C12A -37(2) . . . . ?
 C21B C16B C17B C18B -3.1(12) . . . . ?
 C7C N2C C6C N3C -2.0(9) . . . . ?
 C7C N2C C3C C2C -145.2(9) . . . . ?
 C7C N2C C3C C4C 35.4(14) . . . . ?
 C7C C8C C9C N4C -176.1(9) . . . . ?
 C17A C16A C21A C20A 3.3(19) . . . . ?
 C21A C20A C19A N5A 176.6(16) . . . . ?
 C21A C20A C19A C18A -0.6(13) . . . . ?
 C21A C16A C17A C18A -3(2) . . . . ?
 C27C C28C C29C C30C -0.5(12) . . . . ?
 C13A O1A C16A C17A -59.1(18) . . . . ?
 C13A O1A C16A C21A 123.0(13) . . . . ?
 C20C C19C C18C C17C -1(3) . . . . ?
 C15A C10A C11A C12A -4.5(19) . . . . ?
 C14A C13A C12A C11A -5(2) . . . . ?
 C26C N8C C30C C29C 1.5(16) . . . . ?
 C30C N8C C26C C27C 0.1(16) . . . . ?
 C18C C19C C20C C21C 1(4) . . . . ?
 C18C C17C C16C O1C 178.3(17) . . . . ?
 C18C C17C C16C C21C -1.0(19) . . . . ?
 C3C N2C C6C N3C 177.2(8) . . . . ?
 C3C N2C C7C C8C -178.9(8) . . . . ?
 C3C C2C C1C N1C -1.2(19) . . . . ?
 C3C C4C C5C N1C 2(2) . . . . ?
 C13C O1C C16C C17C -55(2) . . . . ?
 C13C O1C C16C C21C 124(2) . . . . ?
 C2C C3C C4C C5C 0.3(18) . . . . ?
 C11A C10A C15A C14A 1.4(17) . . . . ?
 C12A C13A C14A C15A 1(2) . . . . ?
 C4C C3C C2C C1C -0.6(17) . . . . ?
 C1C N1C C5C C4C -3(2) . . . . ?
 C5C N1C C1C C2C 3(2) . . . . ?
 C17C C16C C21C C20C 1(3) . . . . ?
 C16C O1C C13C C14C 127(3) . . . . ?
 C16C O1C C13C C12C -57(4) . . . . ?
 C2ET O1ET C3ET C4ET 61(2) . . . . ?
 C3ET O1ET C2ET C1ET 178.4(15) . . . . ?
 O1D C16D C17D C18D -176(3) . . . . ?
 O1D C16D C21D C20D 176(3) . . . . ?
 O1D C13D C14D C15D 174(3) . . . . ?
 O1D C13D C12D C11D -172(3) . . . . ?
 C10D N4A C9A C8A 175.3(13) . . . . ?
 C10D C15D C14D C13D -2(3) . . . . ?
 C16D O1D C13D C14D 133(3) . . . . ?
 C16D O1D C13D C12D -57(5) . . . . ?
 C16D C17D C18D C19D -2(3) . . . . ?
 C17D C16D C21D C20D -1(3) . . . . ?
 C13D O1D C16D C17D -52(4) . . . . ?
 C13D O1D C16D C21D 131(3) . . . . ?
 C13D C12D C11D C10D 0(4) . . . . ?
 C15D C10D C11D C12D 1(3) . . . . ?
 C14D C13D C12D C11D -2(4) . . . . ?
 C12D C13D C14D C15D 3(3) . . . . ?
 C11D C10D C15D C14D 0(2) . . . . ?
 C20D C19D C18D C17D 3(4) . . . . ?
 C19D N5A C22A C23A 178(2) . . . . ?
 C19D C20D C21D C16D 2(3) . . . . ?
 C21D C16D C17D C18D 1(2) . . . . ?
 C21D C20D C19D N5A -180(5) . . . . ?
 C21D C20D C19D C18D -3(3) . . . . ?
 C19F N5C C22C C23C 176.7(13) . . . . ?
 C19F C20F C21F C16F 0(3) . . . . ?
 C19F C18F C17F C16F 6(2) . . . . ?
 C20F C19F C18F C17F -2.6(17) . . . . ?
 C18F C19F C20F C21F 0(2) . . . . ?
 C18F C17F C16F C21F -7(3) . . . . ?
 C18F C17F C16F O1F -177.7(16) . . . . ?
 C17F C16F C21F C20F 3(3) . . . . ?
 C17F C16F O1F C13F -95(3) . . . . ?
 C16F O1F C13F C14F 168(3) . . . . ?
 C16F O1F C13F C12F -10(4) . . . . ?
 C21F C16F O1F C13F 93(3) . . . . ?
 C15F C14F C13F O1F -178(2) . . . . ?
 C15F C14F C13F C12F 0(4) . . . . ?
 C15F C10F C11F C12F 2(4) . . . . ?
 C14F C15F C10F N4C -179(3) . . . . ?
 C14F C15F C10F C11F 0(2) . . . . ?
 C14F C13F C12F C11F 2(4) . . . . ?
 C10F N4C C9C C8C 179.3(13) . . . . ?
 C10F C15F C14F C13F -0.8(19) . . . . ?
 C10F C11F C12F C13F -3(4) . . . . ?
 O1F C16F C21F C20F 174(2) . . . . ?
 O1F C13F C12F C11F 180(3) . . . . ?

_smtbx_masks_special_details
;
A solvent mask was calculated and 132 electrons were 
found in a volume of 493 A^3 in 1 void per unit cell. 
This is attributed to the presence of an unknown
combination of solvent molecules per Asymmetric Unit 
which for which low residual electron density
prevented modelling.
;
loop_
  _smtbx_masks_void_nr
  _smtbx_masks_void_average_x
  _smtbx_masks_void_average_y
  _smtbx_masks_void_average_z
  _smtbx_masks_void_volume
  _smtbx_masks_void_count_electrons
  _smtbx_masks_void_content
 1 0.500 0.667 -0.167 492.7 131.8 '2 Unknown'

_smtbx_masks_void_probe_radius     1.2
_smtbx_masks_void_truncation_radius  1.2
_shelx_res_file
;
TITL cut95_a.res in P-1
    cut95_a.res
    created by SHELXL-2018/3 at 17:05:22 on 28-Nov-2022
REM Old TITL cut95 in P-1
REM SHELXT solution in P-1: R1 0.298, Rweak 0.019, Alpha 0.101
REM <I/s> 0.000 for 0 systematic absences, Orientation as input
REM Formula found by SHELXT: C225 B6 N42 O18 F16 Zn4
CELL 0.71073 16.12 17.85 20.56 80.068 89.619 72.859
ZERR 2 0.0032 0.0036 0.0041 0.03 0.03 0.03
LATT 1
SFAC C H B F N O Zn
UNIT 204 168 8 32 56 8.5 4
SADI C16C C21C C16C C17C C17C C18C C18C C19C C20C C19C C21C C20C
RIGU C19C C20C C18C C17C C16C C21C
FLAT C16C C17C C18C C19C C20C C21C
FLAT C15C C14C C10C C13C C11C C12C
RIGU C15C C14C C10C C13C C11C C12C
SADI C11C C10C C12C C11C C12C C13C C13C C14C C14C C15C C10C C15C
DFIX 1.42 O1ET C2ET O1ET C3ET
DANG 2.39 C1ET O1ET
DANG 2.39 O1ET C4ET
DFIX 1.52 C2ET C1ET C4ET C3ET
DANG 2.38 C2ET C3ET
SADI N1S4 C1S4 N1T4 C1T4
SADI C1S4 C2S4 C1T4 C2T4
SADI 0.04 N1S4 C2S4 N1T4 C2T4
SADI N1S3 C1S3 N1T3 C1T3
SADI 0.04 N1S3 C2S3 N1T3 C2T3
SADI C1S3 C2S3 C1T3 C2T3
FLAT N8C C28C C29C C27C C26C C30C
SADI N8C C26C N8C C30C
RIGU N8C C28C C29C C27C C26C C30C
SADI C30C C29C C27C C26C C29C C28C C28C C27C
SADI C11B C10B C15B C10B C15B C14B C14B C13B C13B C12B C12B C11B
RIGU C13B C10B C11B C15B C12B C14B
SADI C18B C17B C19B C18B C20B C19B C21B C20B C21B C16B C17B C16B
FLAT C19B C16B C17B C18B C20B C21B
RIGU C19B C16B C17B C18B C20B C21B
FLAT C13B C10B C11B C15B C12B C14B
SADI C11A C10A C12A C11A C13A C12A C14A C13A C15A C14A C15A C10A
RIGU C10A C13A C15A C14A C11A C12A
FLAT C20A C19A C18A C16A C17A C21A
SADI C18A C17A C17A C16A C21A C16A C21A C20A C20A C19A C19A C18A
RIGU C20A C19A C18A C16A C17A C21A
FLAT C10A C13A C15A C14A C11A C12A
SADI C10A C11A C10D C11D
SADI C10A C15A C10D C15D
SADI C18A C17A C18D C17D
SADI C19A C18A C19D C18D
SADI C16A C21A C16D C21D
SADI O1A C13A O1D C13D
SADI C16A C17A C16D C17D
SADI N5A C19A N5A C19D
SADI 0.04 C16A C13A C16D C13D
SADI 0.04 C17A C21A C17D C21D
SADI 0.04 C13A C15A C13D C15D
SADI C20A C19A C20D C19D
FLAT C16D C17D C20D C19D C18D C21D
SADI C20A C21A C20D C21D
SADI 0.04 C10A C14A C10D C14D
SADI N4A C10A N4A C10D
SADI 0.04 C19A C21A C19D C21D
SADI O1A C16A O1D C16D
RIGU C10D C13D C15D C14D C12D C11D
SADI C13A C14A C13D C14D
SADI 0.04 C19A C17A C19D C17D
SADI C13A C12A C13D C12D
SADI 0.04 C10A C12A C10D C12D
SADI 0.04 C18A C16A C18D C16D
SADI C15A C14A C15D C14D
SADI C11A C12A C11D C12D
SADI 0.04 N5A C20A N5A C20D
SADI 0.04 C13A C11A C13D C11D
SADI 0.04 N5A C18A N5A C18D
SADI 0.04 N4A C15A N4A C15D
SADI 0.04 N4A C11A N4A C11D
SADI 0.04 O1A C17A O1D C17D
SADI 0.04 C15A C11A C15D C11D
SADI 0.04 O1A C21A O1D C21D
SADI 0.04 O1A C14A O1D C14D
SADI 0.04 C14A C12A C14D C12D
SADI 0.04 O1A C12A O1D C12D
SADI C11D C10D C15D C10D C15D C14D C14D C13D C13D C12D C12D C11D
SADI C17D C16D C18D C17D C19D C18D C20D C19D C21D C20D C21D C16D
FLAT C10D C13D C15D C14D C12D C11D
SADI 0.04 C20A C18A C20D C18D
SADI 0.04 C20A C16A C20D C16D
RIGU C16D C17D C20D C19D C18D C21D
EADP C11A C11D
EADP C12D C12A
SADI C20C C21C C20F C21F
SADI 0.04 C14C C10C C14F C10F
SADI 0.04 C20C C18C C20F C18F
SADI 0.04 C10C C12C C10F C12F
SADI C14C C13C C14F C13F
SADI 0.04 O1C C17C O1F C17F
SADI 0.04 C14C C12C C14F C12F
SADI O1C C16C O1F C16F
SADI C19C C20C C19F C20F
SADI 0.04 C19C C21C C19F C21F
SADI C19C C18C C19F C18F
SADI 0.04 C13C C11C C13F C11F
SADI 0.04 C14C O1C C14F O1F
SADI 0.04 C19C C17C C19F C17F
SADI C11F C10F C15F C10F C15F C14F C14F C13F C13F C12F C12F C11F
SADI 0.04 O1C C12C O1F C12F
SADI 0.04 O1C C21C O1F C21F
SADI C10C C11C C10F C11F
RIGU C19F C20F C18F C17F C16F C21F
SADI 0.04 C17C C21C C17F C21F
SADI 0.04 C20C C16C C20F C16F
FLAT C15F C14F C10F C13F C11F C12F
SADI O1C C13C O1F C13F
SADI 0.04 C18C C16C C18F C16F
SADI C18C C17C C18F C17F
SADI 0.04 C13C C16C C13F C16F
SADI C13C C12C C13F C12F
SADI C11C C12C C11F C12F
SADI C17C C16C C17F C16F
SADI C21F C16F C17F C16F C18F C17F C19F C18F C20F C19F C21F C20F
SADI C16C C21C C16F C21F
FLAT C19F C20F C18F C17F C16F C21F
SADI N5C C19C N5C C19F
SADI 0.04 N5C C20C N5C C20F
SADI N4C C10C N4C C10F
SADI 0.04 N5C C18C N5C C18F
SADI C15C C14C C15F C14F
SADI 0.04 N4C C15C N4C C15F
RIGU C15F C14F C10F C13F C11F C12F
SADI 0.04 N4C C11C N4C C11F
SADI C15C C10C C15F C10F
SADI 0.04 C15C C13C C15F C13F
SADI 0.04 C15C C11C C15F C11F
DFIX 1.27 N4C C9C
DFIX 1.37 N2C C6C
DFIX 1.44 C9C C8C
DFIX 1.38 N3C C8C
DFIX 1.37 N2C C7C
DFIX 1.36 C8C C7C
FLAT N2C C6C N3C C8C C7C
DFIX 1.32 N3C C6C
EADP C19D C19A
SADI 0.04 F1A F2A F1A F4A F1A F3A F2A F4A F2A F3A F4A F3A
SADI B1A F1A B1A F2A B1A F4A B1A F3A
RIGU B1A F1A F2A F4A F3A
SADI 0.04 F2A F3A F2B F3B
SADI 0.04 F1A F2A F1B F2B
SADI 0.04 F4A F3A F4B F3B
SADI B1A F2A B1B F2B
SADI 0.04 F1A F3A F1B F3B
SADI B1A F1A B1B F1B
SADI B1A F4A B1B F4B
SADI 0.04 F1A F4A F1B F4B
SADI B1A F3A B1B F3B
SADI 0.04 F2A F4A F2B F4B
SADI B1B F1B B1B F2B B1B F4B B1B F3B
SADI 0.04 F1B F2B F1B F4B F1B F3B F2B F4B F2B F3B F4B F3B
RIGU F1B B1B F2B F4B F3B
RIGU F12A B3A F11A F10A F9A
SADI B3A F10A B3B F10B
SADI 0.04 F10A F12A F10B F11B
SADI 0.04 F10A F9A F10B F12B
SADI 0.04 F11A F12A F9B F11B
SADI B3A F9A B3B F12B
SADI 0.04 F11A F9A F9B F12B
SADI 0.04 F12A F9A F11B F12B
SADI 0.04 F11A F10A F9B F10B
SADI B3A F11A B3B F9B
SADI B3A F12A B3B F11B
RIGU F12B B3B F9B F10B F11B
SADI 0.04 F14 F13 F14 F15 F14 F16 F13 F16 F15 F16
RIGU B4 F14 F13 F15 F16
SADI B4 F14 B4 F13 B4 F15 B4 F16
SADI N1S2 C1S2 N1T2 C1T2
SADI 0.04 N1S2 C2S2 N1T2 C2T2
SADI C1S2 C2S2 C1T2 C2T2
RIGU N1T4 C1T4 C2T4
RIGU N1S4 C1S4 C2S4
EADP B3A B3B
EADP N1S2 N1T2
EADP C20D C20A

L.S. 30
PLAN  60
SIZE 0.2 0.2 0.02
TEMP -173.15
CONF
LIST 6
MORE -1
BOND $H
fmap 2
ABIN
ACTA
REM <olex2.extras>
REM <HklSrc "%.\\cut95_a.hkl">
REM </olex2.extras>

WGHT    0.200000
FVAR       0.27439   0.54389   0.56876   0.73506   0.46535   0.65151   0.46433
FVAR       0.53159
ZN2   7    0.210881    0.717099    0.449886    11.00000    0.06975    0.09529 =
         0.09150    0.00886    0.00536   -0.01734
ZN1   7    0.758442    0.788013    0.092036    11.00000    0.06932    0.11173 =
         0.09376   -0.00260    0.00451   -0.02418
N7B   5   -0.019578    0.920193    0.436921    11.00000    0.05753    0.10338 =
         0.08438   -0.00509    0.00550   -0.01948
N7A   5    0.118742    0.512406    0.456901    11.00000    0.06815    0.10569 =
         0.07760   -0.00253    0.00239   -0.01908
N3B   5    0.874655    0.700454    0.081556    11.00000    0.07408    0.10739 =
         0.08358   -0.00856    0.00594   -0.02318
N6A   5    0.158022    0.624229    0.448860    11.00000    0.07322    0.09930 =
         0.07672    0.00621    0.00264   -0.02001
O1B   6    0.619451    0.807537    0.420468    11.00000    0.06685    0.17774 =
         0.09568   -0.03625    0.00458   -0.02137
N2B   5    0.993573    0.607311    0.063466    11.00000    0.07224    0.10443 =
         0.09056   -0.00062    0.00138   -0.02513
N6B   5    0.099913    0.819340    0.444042    11.00000    0.07054    0.10467 =
         0.08354    0.00144    0.00484   -0.02223
N2A   5    0.882973    0.975185    0.082634    11.00000    0.07497    0.09670 =
         0.08389   -0.00305    0.00401   -0.02057
N3A   5    0.815799    0.882519    0.089407    11.00000    0.06815    0.10821 =
         0.09219   -0.01200    0.00541   -0.01825
N5A   5    0.196008    0.714772    0.341340    11.00000    0.06271    0.12199 =
         0.08315    0.02515    0.00901   -0.01427
N6C   5    0.218438    0.702341    0.555599    11.00000    0.06916    0.08765 =
         0.09827    0.00728    0.00098   -0.02411
N5C   5    0.344116    0.633404    0.476049    11.00000    0.08861
N3C   5    0.719709    0.815332   -0.010425    11.00000    0.07564    0.09780 =
         0.09858    0.01971    0.00091   -0.02519
N7C   5    0.220862    0.695064    0.663544    11.00000    0.09228    0.10070 =
         0.08717   -0.00658    0.00329   -0.02676
N5B   5    0.268927    0.817293    0.435303    11.00000    0.06682    0.10106 =
         0.09212    0.00527    0.00231   -0.01477
N1A   5    1.086754    1.079301    0.074927    11.00000    0.11589    0.11610 =
         0.07743    0.00237    0.00221   -0.05547
N4C   5    0.667811    0.717766    0.088824    11.00000    0.07018    0.12402 =
         0.07691    0.01291   -0.00145   -0.02640
N4B   5    0.800846    0.733170    0.197028    11.00000    0.06716    0.10806 =
         0.08675   -0.01009   -0.00145   -0.02054
N4A   5    0.645180    0.893302    0.105244    11.00000    0.06344    0.13455 =
         0.11380    0.00300    0.00505   -0.02740
PART 1
O1A   6    0.294928    0.902869    0.127340    41.00000    0.07890    0.13804 =
         0.10045    0.04362    0.00476   -0.03031
PART 0
C3B   1    1.060017    0.559963    0.028724    11.00000    0.07197    0.09731 =
         0.10169   -0.01871    0.01579   -0.02832
N1B   5    1.183951    0.467401   -0.042197    11.00000    0.10124    0.12322 =
         0.11623   -0.01685    0.02534   -0.02872
N8A   5    0.071163    0.298590    0.540779    11.00000    0.09299    0.10574 =
         0.10964    0.00648   -0.02467   -0.02043
N8B   5   -0.286070    1.047415    0.413725    11.00000    0.07938    0.14341 =
         0.13546   -0.04672   -0.00034   -0.01773
N2C   5    0.671884    0.858660   -0.112661    11.00000    0.11223
C28B  1   -0.110492    0.963513    0.430712    11.00000    0.07638    0.10256 =
         0.08440   -0.01028   -0.00277   -0.01779
N8C   5    0.136436    0.730579    0.854689    11.00000    0.13640    0.14875 =
         0.09875   -0.01862    0.01500   -0.05801
C6B   1    0.923612    0.672614    0.035279    11.00000    0.07282    0.09991 =
         0.09598   -0.00347    0.00406   -0.02815
C3A   1    0.951923    1.009862    0.080497    11.00000    0.07889    0.10385 =
         0.06632    0.00792    0.00347   -0.02731
C23B  1    0.122686    0.888741    0.438994    11.00000    0.07419    0.08698 =
         0.08241    0.00143    0.00055   -0.02564
C8B   1    0.911113    0.653360    0.141071    11.00000    0.07525    0.10137 =
         0.08703   -0.00475   -0.00321   -0.01919
C2A   1    1.036977    0.963211    0.082237    11.00000    0.08770    0.09407 =
         0.07887    0.00064    0.00408   -0.03464
AFIX  43
H2A   2    1.051052    0.907023    0.086058    11.00000   -1.20000
AFIX   0
C25A  1    0.141469    0.565311    0.489395    11.00000    0.07397    0.10052 =
         0.08073   -0.00789   -0.00444   -0.00433
AFIX  43
H25A  2    0.144842    0.559842    0.536170    11.00000   -1.20000
AFIX   0
C23A  1    0.146545    0.607171    0.386281    11.00000    0.06262    0.10408 =
         0.08861    0.00343    0.00563   -0.02083
C1A   1    1.101660    1.000490    0.078256    11.00000    0.09742    0.11083 =
         0.07790    0.01300   -0.00226   -0.03202
AFIX  43
H1A   2    1.160193    0.968298    0.077858    11.00000   -1.20000
AFIX   0
C7B   1    0.985563    0.597195    0.130483    11.00000    0.08214    0.10703 =
         0.07668   -0.00103   -0.00157   -0.03064
AFIX  43
H7B   2    1.024170    0.558731    0.163066    11.00000   -1.20000
AFIX   0
C24B  1    0.048122    0.952258    0.435119    11.00000    0.07207    0.09691 =
         0.08633   -0.00329    0.00496   -0.02303
AFIX  43
H24B  2    0.044443    1.006891    0.431875    11.00000   -1.20000
AFIX   0
C13B  1    0.666010    0.787594    0.364978    11.00000    0.05477    0.15826 =
         0.08716   -0.02731    0.00264   -0.02490
C8A   1    0.755212    0.956057    0.090607    11.00000    0.08590    0.09766 =
         0.08366   -0.00327    0.00542   -0.02281
C28A  1    0.102679    0.440829    0.484998    11.00000    0.06263    0.09101 =
         0.08760    0.00223   -0.00497   -0.01801
C10B  1    0.756274    0.749412    0.255234    11.00000    0.06325    0.12323 =
         0.08445   -0.00664   -0.00761   -0.01542
C22B  1    0.214081    0.884991    0.435866    11.00000    0.07197    0.09723 =
         0.09329    0.00251    0.00385   -0.02368
AFIX  43
H22B  2    0.232045    0.931377    0.434305    11.00000   -1.20000
AFIX   0
C25B  1    0.015459    0.839336    0.443157    11.00000    0.07078    0.09392 =
         0.08686    0.00612    0.00346   -0.01811
AFIX  43
H25B  2   -0.017493    0.802736    0.446403    11.00000   -1.20000
AFIX   0
PART 1
C15C  1    0.699540    0.600113    0.177746    51.00000    0.05523    0.11873 =
         0.07403   -0.02773    0.00186   -0.02267
AFIX  43
H15C  2    0.759775    0.591625    0.171193    51.00000   -1.20000
AFIX   0
PART 0
C22C  1    0.364282    0.623600    0.537954    11.00000    0.07563    0.10374 =
         0.10377    0.00585   -0.00812   -0.02841
AFIX  43
H22C  2    0.421367    0.593395    0.554579    11.00000   -1.20000
AFIX   0
C23C  1    0.300652    0.658236    0.582068    11.00000    0.08309    0.09152 =
         0.08984    0.00813   -0.00273   -0.02901
C9A   1    0.664757    0.957949    0.098141    11.00000    0.06165    0.12588 =
         0.08809   -0.00330    0.00678   -0.02250
AFIX  43
H9A   2    0.620859    1.007114    0.097739    11.00000   -1.20000
AFIX   0
PART 1
C14C  1    0.673900    0.548242    0.227103    51.00000    0.06295    0.11609 =
         0.09632   -0.01394    0.01485   -0.00787
AFIX  43
H14C  2    0.716210    0.505509    0.253819    51.00000   -1.20000
AFIX   0
PART 0
C11B  1    0.740842    0.689704    0.302013    11.00000    0.07632    0.11807 =
         0.08301   -0.01528    0.00319   -0.02505
AFIX  43
H11B  2    0.761615    0.635697    0.296387    11.00000   -1.20000
AFIX   0
C24A  1    0.122181    0.540684    0.390662    11.00000    0.06922    0.11833 =
         0.08211    0.00237   -0.00069   -0.02577
AFIX  43
H24A  2    0.109756    0.517706    0.354926    11.00000   -1.20000
AFIX   0
C6A   1    0.892175    0.894807    0.085717    11.00000    0.07089    0.10322 =
         0.08649   -0.00111    0.00887   -0.02322
AFIX  43
H6A   2    0.945936    0.854568    0.085227    11.00000   -1.20000
AFIX   0
C27B  1   -0.136692    1.044798    0.412317    11.00000    0.07186    0.10609 =
         0.09217   -0.00852    0.00129   -0.02019
AFIX  43
H27B  2   -0.095431    1.073510    0.404322    11.00000   -1.20000
AFIX   0
C29A  1    0.107797    0.415406    0.552624    11.00000    0.08344    0.11169 =
         0.09839   -0.00975    0.00236   -0.03327
AFIX  43
H29A  2    0.121798    0.446824    0.581266    11.00000   -1.20000
AFIX   0
C19B  1    0.359822    0.814291    0.430886    11.00000    0.06488    0.09946 =
         0.08676    0.00396    0.00294   -0.01617
C24C  1    0.302807    0.653771    0.647865    11.00000    0.08108    0.10310 =
         0.10702    0.00372   -0.00989   -0.02762
AFIX  43
H24C  2    0.351371    0.627297    0.677779    11.00000   -1.20000
AFIX   0
C9B   1    0.869823    0.673528    0.201481    11.00000    0.07712    0.11898 =
         0.08516   -0.00293   -0.00595   -0.03157
AFIX  43
H9B   2    0.893439    0.643165    0.243382    11.00000   -1.20000
AFIX   0
C4A   1    0.933905    1.090884    0.077317    11.00000    0.08919    0.10448 =
         0.08713    0.00518    0.01757   -0.03227
AFIX  43
H4A   2    0.875500    1.123308    0.077883    11.00000   -1.20000
AFIX   0
C28C  1    0.192533    0.707060    0.728642    11.00000    0.10999    0.10045 =
         0.09798   -0.00707    0.00292   -0.04416
C15B  1    0.727466    0.827513    0.264928    11.00000    0.08446    0.11838 =
         0.09076   -0.00497    0.00014   -0.00858
AFIX  43
H15B  2    0.738856    0.868321    0.233232    11.00000   -1.20000
AFIX   0
C30A  1    0.092710    0.345093    0.578227    11.00000    0.08781    0.11442 =
         0.09117    0.00094   -0.00119   -0.03340
AFIX  43
H30A  2    0.097719    0.328291    0.624839    11.00000   -1.20000
AFIX   0
PART 1
C19C  1    0.400032    0.598177    0.427018    51.00000    0.07278    0.08300 =
         0.09535    0.02627   -0.00998   -0.00201
PART 0
C16B  1    0.532463    0.807846    0.421531    11.00000    0.05903    0.12877 =
         0.09490   -0.01267    0.00731   -0.02583
C25C  1    0.172066    0.723454    0.605730    11.00000    0.07780    0.09716 =
         0.09767   -0.00291   -0.00358   -0.02439
AFIX  43
H25C  2    0.112633    0.754296    0.602224    11.00000   -1.20000
AFIX   0
C4B   1    1.116167    0.490936    0.059923    11.00000    0.08965    0.10860 =
         0.10013   -0.00178    0.01811   -0.02636
AFIX  43
H4B   2    1.112751    0.473384    0.105911    11.00000   -1.20000
AFIX   0
C22A  1    0.165593    0.658589    0.329218    11.00000    0.06667    0.12669 =
         0.09278    0.00072   -0.00092   -0.03252
AFIX  43
H22A  2    0.156327    0.651553    0.285376    11.00000   -1.20000
AFIX   0
C7A   1    0.794569    1.011248    0.085831    11.00000    0.07796    0.10706 =
         0.07563    0.00160   -0.00495   -0.01598
AFIX  43
H7A   2    0.767237    1.066460    0.084747    11.00000   -1.20000
AFIX   0
PART 1
C20A  1    0.185843    0.842259    0.274947    41.00000    0.06743    0.12578 =
         0.08034    0.01173   -0.00090   -0.02764
AFIX  43
H20A  2    0.145941    0.865760    0.305210    41.00000   -1.20000
AFIX   0
PART 0
C17B  1    0.486780    0.801208    0.367762    11.00000    0.07161    0.14116 =
         0.08945   -0.00088    0.00208   -0.03551
AFIX  43
H17B  2    0.514051    0.796168    0.326972    11.00000   -1.20000
AFIX   0
C5A   1    1.001282    1.125065    0.073282    11.00000    0.12181    0.11271 =
         0.09398   -0.01100    0.01588   -0.03365
AFIX  43
H5A   2    0.988074    1.181207    0.069304    11.00000   -1.20000
AFIX   0
C12B  1    0.695078    0.709170    0.356874    11.00000    0.08478    0.15509 =
         0.08234   -0.02321    0.00774   -0.04065
AFIX  43
H12B  2    0.683699    0.668641    0.388883    11.00000   -1.20000
AFIX   0
C14B  1    0.682248    0.847168    0.320151    11.00000    0.07507    0.13188 =
         0.09939   -0.01890    0.00091   -0.00861
AFIX  43
H14B  2    0.662930    0.900866    0.326750    11.00000   -1.20000
AFIX   0
PART 1
C10C  1    0.639971    0.663495    0.138077    51.00000    0.07053    0.10621 =
         0.08187   -0.01949   -0.00370   -0.02351
PART 0
C29B  1   -0.169809    0.922915    0.440291    11.00000    0.07904    0.11065 =
         0.12632   -0.02430    0.02365   -0.02519
AFIX  43
H29B  2   -0.152540    0.866524    0.452551    11.00000   -1.20000
AFIX   0
PART 1
O1C   6    0.560406    0.502885    0.281482    51.00000    0.07069    0.09250 =
         0.10579    0.01722    0.01585   -0.01776
C19A  1    0.220713    0.759771    0.283031    41.00000    0.06230    0.12565 =
         0.07750    0.00500   -0.00743   -0.02590
PART 0
C8C   1    0.654818    0.781646   -0.022346    11.00000    0.09950
C2B   1    1.065925    0.583249   -0.039164    11.00000    0.11009    0.11008 =
         0.09942   -0.00803    0.01097   -0.03620
AFIX  43
H2B   2    1.028554    0.632152   -0.062356    11.00000   -1.20000
AFIX   0
C18B  1    0.400142    0.801878    0.373146    11.00000    0.07309    0.13218 =
         0.09209   -0.00499    0.00370   -0.04010
AFIX  43
H18B  2    0.369399    0.793782    0.337014    11.00000   -1.20000
AFIX   0
C20B  1    0.406187    0.820575    0.484169    11.00000    0.06914    0.15943 =
         0.09797   -0.02991    0.01099   -0.01976
AFIX  43
H20B  2    0.378824    0.826136    0.524867    11.00000   -1.20000
AFIX   0
PART 1
C10A  1    0.555466    0.890746    0.112882    41.00000    0.07319    0.06145 =
         0.10990   -0.00829    0.01412   -0.01593
PART 0
C27A  1    0.079498    0.395837    0.445640    11.00000    0.11459    0.10050 =
         0.09190   -0.00546   -0.01288   -0.02953
AFIX  43
H27A  2    0.074544    0.411110    0.398886    11.00000   -1.20000
AFIX   0
C26B  1   -0.224416    1.083597    0.405767    11.00000    0.07909    0.11314 =
         0.10065   -0.01084   -0.00187   -0.01707
AFIX  43
H26B  2   -0.242243    1.140109    0.394808    11.00000   -1.20000
AFIX   0
C30B  1   -0.258196    0.967809    0.431312    11.00000    0.06716    0.14919 =
         0.15318   -0.04082    0.01256   -0.03270
AFIX  43
H30B  2   -0.300493    0.940110    0.438105    11.00000   -1.20000
AFIX   0
C9C   1    0.628570    0.730100    0.032265    11.00000    0.10593
AFIX  43
H9C   2    0.584070    0.706717    0.025897    11.00000   -1.20000
AFIX   0
PART 1
C18A  1    0.278492    0.722629    0.239956    41.00000    0.07475    0.12271 =
         0.09096    0.00840    0.00808   -0.03248
AFIX  43
H18A  2    0.300740    0.666203    0.246275    41.00000   -1.20000
AFIX   0
PART 0
C1B   1    1.127434    0.533312   -0.071478    11.00000    0.10220    0.10910 =
         0.09849   -0.00900    0.01746   -0.02086
AFIX  43
H1B   2    1.128907    0.547676   -0.118070    11.00000   -1.20000
AFIX   0
C26A  1    0.063040    0.325005    0.477620    11.00000    0.13038    0.11869 =
         0.12061   -0.02465   -0.02151   -0.03611
AFIX  43
H26A  2    0.044523    0.294359    0.450516    11.00000   -1.20000
AFIX   0
C29C  1    0.105719    0.734172    0.740144    11.00000    0.09599    0.15552 =
         0.09903   -0.01894    0.00912   -0.04852
AFIX  43
H29C  2    0.062899    0.745022    0.705463    11.00000   -1.20000
AFIX   0
C5B   1    1.178231    0.446436    0.024409    11.00000    0.10205    0.10689 =
         0.12232   -0.00942    0.01712   -0.01759
AFIX  43
H5B   2    1.218864    0.399110    0.047118    11.00000   -1.20000
AFIX   0
C6C   1    0.728900    0.858788   -0.066071    11.00000    0.10000
AFIX  43
H6C   2    0.770797    0.886947   -0.072644    11.00000   -1.20000
AFIX   0
PART 1
C16A  1    0.270579    0.851944    0.180015    41.00000    0.07950    0.12461 =
         0.06645    0.00756   -0.00837   -0.03939
PART 0
C21B  1    0.492786    0.818931    0.479544    11.00000    0.06961    0.19440 =
         0.10072   -0.04324   -0.00072   -0.01749
AFIX  43
H21B  2    0.523923    0.825422    0.516192    11.00000   -1.20000
AFIX   0
C7C   1    0.622524    0.808320   -0.085484    11.00000    0.12179
AFIX  43
H7C   2    0.577185    0.796033   -0.106611    11.00000   -1.20000
AFIX   0
PART 1
C17A  1    0.302928    0.770398    0.187221    41.00000    0.07854    0.12245 =
         0.08777    0.00840    0.00600   -0.02705
AFIX  43
H17A  2    0.341734    0.746879    0.156341    41.00000   -1.20000
AFIX   0
C21A  1    0.210384    0.889825    0.221767    41.00000    0.07571    0.11477 =
         0.08243    0.00426   -0.00319   -0.03281
AFIX  43
H21A  2    0.186811    0.946194    0.214282    41.00000   -1.20000
AFIX   0
PART 0
C27C  1    0.251771    0.692923    0.780387    11.00000    0.11088    0.15626 =
         0.10589   -0.02254   -0.00295   -0.04607
AFIX  43
H27C  2    0.312487    0.675661    0.774291    11.00000   -1.20000
AFIX   0
PART 1
C13A  1    0.383260    0.893975    0.125451    41.00000    0.05698    0.09897 =
         0.09728    0.01722    0.00569   -0.02510
C20C  1    0.372424    0.553088    0.387420    51.00000    0.04986    0.17692 =
         0.11612   -0.02863    0.01449   -0.01904
AFIX  43
H20C  2    0.316971    0.544993    0.393092    51.00000   -1.20000
AFIX   0
C15A  1    0.501074    0.907653    0.058748    41.00000    0.06870    0.16427 =
         0.10621    0.06104    0.00547   -0.02038
AFIX  43
H15A  2    0.522367    0.918542    0.016056    41.00000   -1.20000
AFIX   0
C14A  1    0.415800    0.909268    0.064711    41.00000    0.07015    0.17841 =
         0.08917    0.01950   -0.00007   -0.01504
AFIX  43
H14A  2    0.378881    0.921172    0.026119    41.00000   -1.20000
AFIX   0
PART 0
C26C  1    0.219934    0.704709    0.841855    11.00000    0.13451    0.18540 =
         0.10054   -0.01809    0.00364   -0.06681
AFIX  43
H26C  2    0.261203    0.693356    0.877706    11.00000   -1.20000
AFIX   0
C30C  1    0.082103    0.745285    0.803050    11.00000    0.12198    0.18074 =
         0.10701   -0.02812    0.01295   -0.05269
AFIX  43
H30C  2    0.021802    0.765153    0.809876    11.00000   -1.20000
AFIX   0
PART 1
C18C  1    0.481060    0.609773    0.416073    51.00000    0.08976    0.10017 =
         0.06915    0.01598   -0.00514   -0.02242
AFIX  43
H18C  2    0.500606    0.640978    0.442027    51.00000   -1.20000
AFIX   0
PART 0
C3C   1    0.660720    0.902762   -0.179224    11.00000    0.12017
PART 1
C13C  1    0.586111    0.559763    0.236690    51.00000    0.05786    0.10970 =
         0.11839    0.01114    0.00942   -0.00523
PART 0
C2C   1    0.735277    0.913227   -0.211960    11.00000    0.12610
AFIX  43
H2C   2    0.791782    0.891982   -0.191127    11.00000   -1.20000
AFIX   0
N1C   5    0.646738    0.984666   -0.306447    11.00000    0.16204
PART 1
C11A  1    0.523513    0.873741    0.173353    41.00000    0.08780    0.19449 =
         0.10216   -0.03834    0.00959   -0.05394
AFIX  43
H11A  2    0.561392    0.858026    0.211707    41.00000   -1.20000
AFIX   0
C12A  1    0.437989    0.879012    0.179424    41.00000    0.08806    0.22209 =
         0.09669   -0.04422    0.02203   -0.05869
AFIX  43
H12A  2    0.415960    0.872093    0.222297    41.00000   -1.20000
AFIX   0
PART 0
C4C   1    0.577866    0.933501   -0.208048    11.00000    0.15060
AFIX  43
H4C   2    0.528069    0.926524   -0.185857    11.00000   -1.20000
AFIX   0
PART 1
C11C  1    0.552580    0.674883    0.148760    51.00000    0.07653    0.10603 =
         0.09654    0.00622    0.01604   -0.00890
AFIX  43
H11C  2    0.510299    0.717143    0.121577    51.00000   -1.20000
AFIX   0
PART 0
C1C   1    0.721338    0.956326   -0.276329    11.00000    0.15149
AFIX  43
H1C   2    0.770100    0.965082   -0.299030    11.00000   -1.20000
AFIX   0
PART 1
C12C  1    0.526052    0.625346    0.198656    51.00000    0.08289    0.11089 =
         0.11518    0.02618    0.01360   -0.00351
AFIX  43
H12C  2    0.466029    0.636233    0.207079    51.00000   -1.20000
AFIX   0
PART 0
C5C   1    0.572854    0.977349   -0.274987    11.00000    0.17743
AFIX  43
H5C   2    0.517702    1.001472   -0.297585    11.00000   -1.20000
AFIX   0
PART 1
C17C  1    0.534111    0.577074    0.368353    51.00000    0.07478    0.10340 =
         0.08296    0.00397   -0.00463   -0.03438
AFIX  43
H17C  2    0.589494    0.585174    0.362134    51.00000   -1.20000
AFIX   0

PART 0
F14   4    0.152970    1.070108    0.400382    11.00000    0.10889    0.10794 =
         0.14361    0.01472    0.02170   -0.02884
F13   4    0.019192    1.149198    0.404315    11.00000    0.11018    0.12150 =
         0.13497    0.01198    0.02387   -0.01583
F15   4    0.131413    1.201210    0.381798    11.00000    0.19677    0.11698 =
         0.25831   -0.03053    0.07841   -0.05498
F16   4    0.085556    1.150467    0.307736    11.00000    0.13647    0.34697 =
         0.11090   -0.00818    0.00528   -0.01290
B4    3    0.096206    1.141296    0.373787    11.00000    0.10311    0.13236 =
         0.11426   -0.00997    0.00723   -0.01065

N1S1  5    0.083787    0.757228    0.081529    11.00000    0.09225    0.12056 =
         0.17476   -0.01591    0.01007   -0.02839
C1S1  1    0.147109    0.718554    0.069155    11.00000    0.09618    0.10981 =
         0.11792    0.00030    0.00707   -0.03084
C2S1  1    0.229270    0.663229    0.054274    11.00000    0.11705    0.15822 =
         0.18231   -0.05233    0.04761   -0.04781
AFIX 137
H2SA  2    0.268493    0.693399    0.035854    11.00000   -1.50000
H2SB  2    0.217964    0.632409    0.022077    11.00000   -1.50000
H2SC  2    0.256253    0.626909    0.094947    11.00000   -1.50000
AFIX   0

B2    3    0.912866    0.457743    0.308347    11.00000    0.10958    0.09885 =
         0.13911   -0.02179   -0.03894    0.01109
F5    4    0.957958    0.511732    0.312911    11.00000    0.09899    0.13319 =
         0.11102   -0.00005   -0.00663   -0.03939
F7    4    0.886419    0.465230    0.241639    11.00000    0.09392    0.16320 =
         0.09726   -0.02092   -0.01699   -0.01012
F6    4    0.836341    0.476289    0.344196    11.00000    0.14272    0.17214 =
         0.11475   -0.02660    0.00978   -0.07248
F8    4    0.958043    0.381281    0.334248    11.00000    0.22877    0.12728 =
         0.17616   -0.01629   -0.10528   -0.00866
PART 1
B1A   3    0.392473    0.782494   -0.067641    61.00000    0.11457    0.10952 =
         0.16206    0.01221   -0.05289   -0.01420
F1A   4    0.303550    0.803627   -0.059518    61.00000    0.12344    0.10266 =
         0.11552    0.00022   -0.01378   -0.01759
F2A   4    0.418527    0.850864   -0.082030    61.00000    0.11532    0.11816 =
         0.19079    0.00200   -0.01064   -0.01974
F4A   4    0.435267    0.737483   -0.009528    61.00000    0.20867    0.14449 =
         0.23490    0.06179   -0.12854   -0.04825
F3A   4    0.412394    0.739161   -0.118260    61.00000    0.16210    0.15603 =
         0.24706   -0.06544    0.03161   -0.03016

C16C  1    0.505283    0.532763    0.330201    51.00000    0.04981    0.11179 =
         0.08734   -0.00462    0.00476   -0.02789
C21C  1    0.426041    0.519649    0.339302    51.00000    0.05902    0.11140 =
         0.10341    0.00023    0.01102   -0.03295
AFIX  43
H21C  2    0.407494    0.488061    0.313149    51.00000   -1.20000
AFIX   0

PART 0
O1ET  6    0.960334    0.933428    0.280722    11.00000    0.18586
C1ET  1    0.964788    0.800135    0.282052    11.00000    0.17498
AFIX 137
H1EA  2    1.018470    0.785911    0.309550    11.00000   -1.50000
H1EB  2    0.973661    0.767579    0.247334    11.00000   -1.50000
H1EC  2    0.917832    0.790436    0.309553    11.00000   -1.50000
AFIX   0
C2ET  1    0.942293    0.881587    0.252803    11.00000    0.19497
AFIX  23
H2EA  2    0.968953    0.884266    0.209275    11.00000   -1.20000
H2EB  2    0.878568    0.899624    0.243813    11.00000   -1.20000
AFIX   0
C3ET  1    0.942718    1.014903    0.255215    11.00000    0.20269
AFIX  23
H3EA  2    0.973734    1.021016    0.213838    11.00000   -1.20000
H3EB  2    0.966202    1.039948    0.287200    11.00000   -1.20000
AFIX   0
C4ET  1    0.845761    1.059752    0.240660    11.00000    0.23858
AFIX 137
H4EA  2    0.812393    1.021423    0.245150    11.00000   -1.50000
H4EB  2    0.837105    1.090271    0.195511    11.00000   -1.50000
H4EC  2    0.825924    1.096176    0.272032    11.00000   -1.50000
AFIX   6

PART 1
N1S4  5    0.685836    0.619729    0.525605    21.00000    0.07741    0.16207 =
         0.13946    0.02027   -0.00096   -0.02228
C1S4  1    0.692240    0.665642    0.557573    21.00000    0.09334    0.17405 =
         0.18482   -0.00276   -0.01088   -0.02567
C2S4  1    0.700152    0.723094    0.597543    21.00000    0.15527    0.27427 =
         0.18900   -0.04241   -0.04090   -0.05933
AFIX   6

PART 2
N1T4  5    0.679847    0.571779    0.506782   -21.00000    0.06336    0.14314 =
         0.11898    0.04339   -0.01253   -0.02726
C1T4  1    0.651961    0.595934    0.553881   -21.00000    0.08966    0.13157 =
         0.12952    0.03417   -0.00847   -0.03079
C2T4  1    0.617133    0.626035    0.612927   -21.00000    0.20703    0.14366 =
         0.17216   -0.03408   -0.00998   -0.02737
AFIX   0

PART 0
O1W   6    0.500000    0.500000    0.000000    10.25000    0.11947

PART 1
AFIX   6
N1S3  5    0.642896    1.023142    0.223581    31.00000   10.15000
C1S3  1    0.624297    1.084658    0.240430    31.00000   10.15000
C2S3  1    0.600881    1.161689    0.261486    31.00000   10.15000
AFIX 137
H2SD  2    0.571750    1.203491    0.224409    31.00000   -1.50000
H2SE  2    0.653508    1.172064    0.276168    31.00000   -1.50000
H2SF  2    0.561617    1.161388    0.298061    31.00000   -1.50000
AFIX   6

PART 2
N1T3  5    0.667219    1.018316    0.242096   -31.00000   10.15000
C1T3  1    0.678342    1.080558    0.232429   -31.00000   10.15000
C2T3  1    0.691994    1.158731    0.220302   -31.00000   10.15000
AFIX 137
H2TA  2    0.636729    1.199613    0.205792   -31.00000   -1.50000
H2TB  2    0.734032    1.160455    0.185846   -31.00000   -1.50000
H2TC  2    0.714415    1.168767    0.261102   -31.00000   -1.50000
AFIX   0

O1D   6    0.294776    0.940994    0.151083   -41.00000    0.04728    0.20778 =
         0.10111    0.05401    0.00315    0.00418
C10D  1    0.552114    0.922574    0.116454   -41.00000    0.06473    0.04423 =
         0.10595   -0.01947    0.01642   -0.00645
C16D  1    0.273188    0.884256    0.200265   -41.00000    0.02829    0.12022 =
         0.06159    0.01075   -0.01788   -0.03355
C17D  1    0.308381    0.802922    0.200704   -41.00000    0.05331    0.11978 =
         0.08320    0.00723    0.00744   -0.03007
AFIX  43
H17D  2    0.350158    0.784976    0.169613   -41.00000   -1.20000
AFIX   0
C13D  1    0.383390    0.928596    0.143977   -41.00000    0.05960    0.07311 =
         0.09163    0.01409    0.01095   -0.01350
C15D  1    0.493648    0.928698    0.067172   -41.00000    0.06906    0.14472 =
         0.09099    0.01001    0.01048   -0.02091
AFIX  43
H15D  2    0.511370    0.930250    0.022925   -41.00000   -1.20000
AFIX   0
C14D  1    0.409574    0.932649    0.080615   -41.00000    0.06086    0.11918 =
         0.08984   -0.01397    0.00472   -0.00436
AFIX  43
H14D  2    0.368951    0.938272    0.045506   -41.00000   -1.20000
AFIX   0
C12D  1    0.442751    0.923684    0.192418   -41.00000    0.08806    0.22209 =
         0.09669   -0.04422    0.02203   -0.05869
AFIX  43
H12D  2    0.424945    0.922531    0.236626   -41.00000   -1.20000
AFIX   0
C11D  1    0.526607    0.920356    0.180059   -41.00000    0.08780    0.19449 =
         0.10216   -0.03834    0.00959   -0.05394
AFIX  43
H11D  2    0.566708    0.916560    0.215014   -41.00000   -1.20000
AFIX   0
C20D  1    0.187967    0.855074    0.291799   -41.00000    0.06743    0.12578 =
         0.08034    0.01173   -0.00090   -0.02764
AFIX  43
H20D  2    0.145568    0.872973    0.322491   -41.00000   -1.20000
AFIX   0
C19D  1    0.223493    0.773381    0.293414   -41.00000    0.06230    0.12565 =
         0.07750    0.00500   -0.00743   -0.02590
C18D  1    0.282785    0.747747    0.246364   -41.00000    0.04922    0.11553 =
         0.10548    0.03665    0.00955   -0.00126
AFIX  43
H18D  2    0.305804    0.692458    0.245449   -41.00000   -1.20000
AFIX   0
C21D  1    0.213027    0.911564    0.246174   -41.00000    0.06472    0.12993 =
         0.06289    0.00078   -0.00708   -0.03315
AFIX  43
H21D  2    0.189574    0.966930    0.246608   -41.00000   -1.20000
AFIX   0
C19F  1    0.413868    0.599992    0.437271   -51.00000    0.06123    0.12869 =
         0.07979    0.02906    0.02037   -0.00904
C20F  1    0.391035    0.571072    0.383982   -51.00000    0.06148    0.17397 =
         0.07778    0.02331    0.00071    0.00362
AFIX  43
H20F  2    0.333468    0.568438    0.379001   -51.00000   -1.20000
AFIX   0
C18F  1    0.496897    0.604589    0.446910   -51.00000    0.07187    0.08135 =
         0.10588    0.03161    0.00840   -0.01381
AFIX  43
H18F  2    0.511785    0.626504    0.482501   -51.00000   -1.20000
AFIX   0
C17F  1    0.557116    0.575762    0.402263   -51.00000    0.05733    0.08123 =
         0.12153    0.02133    0.00403   -0.01138
AFIX  43
H17F  2    0.616103    0.573137    0.409629   -51.00000   -1.20000
AFIX   0
C16F  1    0.534052    0.551015    0.347964   -51.00000    0.06752    0.08149 =
         0.11557    0.01726    0.01360   -0.01487
C21F  1    0.451608    0.545704    0.337424   -51.00000    0.06529    0.15339 =
         0.09761    0.00378    0.01488   -0.02554
AFIX  43
H21F  2    0.436888    0.525869    0.300504   -51.00000   -1.20000
AFIX   0
C15F  1    0.704382    0.593867    0.164357   -51.00000    0.11800    0.08201 =
         0.06085   -0.01899    0.02494   -0.02995
AFIX  43
H15F  2    0.755410    0.576655    0.140808   -51.00000   -1.20000
AFIX   0
C14F  1    0.686058    0.543470    0.218478   -51.00000    0.10343    0.08830 =
         0.06512   -0.00389    0.01804   -0.01743
AFIX  43
H14F  2    0.723743    0.490997    0.232358   -51.00000   -1.20000
AFIX   0
C10F  1    0.646914    0.669467    0.145505   -51.00000    0.09240    0.11434 =
         0.07495    0.02379    0.00525   -0.01810
O1F   6    0.598448    0.519927    0.306308   -51.00000    0.08032    0.12563 =
         0.12393    0.04350    0.02945    0.01115
C13F  1    0.611293    0.572105    0.251457   -51.00000    0.07749    0.13249 =
         0.09790    0.01787    0.01676   -0.02115
C11F  1    0.571473    0.697725    0.177630   -51.00000    0.08308    0.15197 =
         0.12242    0.05026    0.01947   -0.00943
AFIX  43
H11F  2    0.532356    0.749215    0.162344   -51.00000   -1.20000
AFIX   0
C12F  1    0.554687    0.648708    0.232733   -51.00000    0.10920    0.17445 =
         0.13246    0.06691    0.04611    0.02209
AFIX  43
H12F  2    0.505132    0.667117    0.257480   -51.00000   -1.20000
AFIX   0

F1B   4    0.306765    0.794536   -0.063397   -61.00000    0.08885    0.15408 =
         0.21905   -0.05110   -0.01430   -0.03320
B1B   3    0.388915    0.788642   -0.039489   -61.00000    0.08707    0.12602 =
         0.18892   -0.01023   -0.00747   -0.04315
F2B   4    0.406356    0.860911   -0.056093   -61.00000    0.10787    0.13719 =
         0.17084   -0.02032    0.03124   -0.04967
F4B   4    0.394459    0.765151    0.028075   -61.00000    0.15175    0.17247 =
         0.19024   -0.00022   -0.01582   -0.09191
F3B   4    0.450024    0.732489   -0.068069   -61.00000    0.11388    0.15396 =
         0.25112   -0.04190   -0.01275   -0.00926
PART 1
AFIX   6
B3A   3    0.236174    0.488495    0.231370    71.00000    0.11203    0.17292 =
         0.13957   -0.02516   -0.01856   -0.05416
F11A  4    0.274479    0.457578    0.295130    71.00000    0.08977    0.29840 =
         0.14438   -0.08166   -0.00954   -0.04018
F10A  4    0.270077    0.549182    0.201353    71.00000    0.09589    0.14219 =
         0.42062    0.00961    0.00550   -0.03490
F12A  4    0.254245    0.427655    0.193669    71.00000    0.11356    0.16326 =
         0.13645   -0.01696    0.01275   -0.06632
F9A   4    0.146006    0.519543    0.235199    71.00000    0.10790    0.18206 =
         0.09188   -0.02659   -0.00052   -0.06324
AFIX   6

PART 2
B3B   3    0.224712    0.503709    0.231242   -71.00000    0.11203    0.17292 =
         0.13957   -0.02516   -0.01856   -0.05416
F9B   4    0.145387    0.564536    0.224428   -71.00000    0.13191    0.20296 =
         0.23512   -0.02157   -0.08675   -0.03849
F10B  4    0.293060    0.536169    0.237023   -71.00000    0.11559    0.13200 =
         0.44593    0.00075   -0.14370   -0.02168
F11B  4    0.225335    0.447258    0.287973   -71.00000    0.25093    0.17190 =
         0.13687   -0.00479   -0.04730   -0.03525
F12B  4    0.235094    0.466793    0.175505   -71.00000    0.23753    0.25775 =
         0.12759   -0.04038   -0.00571   -0.09403
AFIX   6

PART 1
N1S2  5    0.134201    1.272346    0.134846    81.00000    0.10129    0.09923 =
         0.11436    0.02987    0.01724    0.00373
C1S2  1    0.118388    1.301354    0.181685    81.00000    0.11009    0.13608 =
         0.22384    0.00089    0.08172   -0.03999
C2S2  1    0.098591    1.337715    0.240190    81.00000    0.13747    0.15747 =
         0.13079   -0.04229    0.04949   -0.07197
AFIX 137
H2SG  2    0.038326    1.372194    0.236080    81.00000   -1.50000
H2SH  2    0.137828    1.369523    0.244548    81.00000   -1.50000
H2SI  2    0.106271    1.295950    0.279392    81.00000   -1.50000
AFIX   6

PART 2
N1T2  5    0.123363    1.290010    0.124598   -81.00000    0.10129    0.09923 =
         0.11436    0.02987    0.01724    0.00373
C1T2  1    0.141736    1.296140    0.177594   -81.00000    0.15709    0.10764 =
         0.02575   -0.00113    0.00300   -0.05310
C2T2  1    0.164703    1.303870    0.243840   -81.00000    0.25799    0.27913 =
         0.09599   -0.04015    0.01742   -0.19464
AFIX 137
H2TD  2    0.197567    1.342491    0.241039   -81.00000   -1.50000
H2TE  2    0.200386    1.252028    0.267639   -81.00000   -1.50000
H2TF  2    0.111642    1.322301    0.267504   -81.00000   -1.50000
AFIX   0
HKLF 4


REM  cut95_a.res in P-1
REM wR2 = 0.3389, GooF = S = 1.397, Restrained GooF = 1.359 for all data
REM R1 = 0.0998 for 9437 Fo > 4sig(Fo) and 0.1255 for all 13475 data
REM 1632 parameters refined using 1093 restraints

END

WGHT      0.2000      0.0000

REM Highest difference peak  1.031,  deepest hole -0.813,  1-sigma level  0.086
Q1    1   0.5383  0.5244  0.0382  11.00000  0.05    1.03
Q2    1   0.8540  0.9716  0.2518  11.00000  0.05    1.00
Q3    1   0.5789  0.4836  0.0198  11.00000  0.05    0.84
Q4    1   0.6785  0.7925  0.6371  11.00000  0.05    0.75
Q5    1   0.5893  0.9338 -0.3203  11.00000  0.05    0.74
Q6    1   0.5576  0.8744 -0.2199  11.00000  0.05    0.68
Q7    1   0.6642  0.8239 -0.1311  11.00000  0.05    0.66
Q8    1   0.6395  0.8584 -0.1980  11.00000  0.05    0.65
Q9    1   0.5411  0.9110 -0.2875  11.00000  0.05    0.59
Q10   1   0.0688  1.0773  0.3223  11.00000  0.05    0.55
Q11   1   0.7007  0.8802 -0.2340  11.00000  0.05    0.54
Q12   1   0.6640  0.9182 -0.3117  11.00000  0.05    0.51
Q13   1   0.9870  1.0616  0.2570  11.00000  0.05    0.46
Q14   1   1.0163  0.4011  0.2993  11.00000  0.05    0.45
Q15   1   0.2223  0.5601  0.1647  11.00000  0.05    0.43
Q16   1   0.6258  0.7634 -0.0978  11.00000  0.05    0.43
Q17   1   0.5540  1.1628  0.3503  11.00000  0.05    0.41
Q18   1   0.7173  0.8009  0.5847  11.00000  0.05    0.39
Q19   1   0.7284  1.0901  0.2434  11.00000  0.05    0.39
Q20   1   0.3464  0.6640  0.4962  11.00000  0.05    0.38
Q21   1   0.5323  1.2218  0.3093  11.00000  0.05    0.38
Q22   1   0.1992  0.5923  0.1865  11.00000  0.05    0.37
Q23   1   0.6710  0.7382 -0.0375  11.00000  0.05    0.37
Q24   1   0.9381  0.3792  0.3338  11.00000  0.05    0.36
Q25   1   0.6433  0.8223 -0.0075  11.00000  0.05    0.35
Q26   1   0.3392  0.6124  0.4525  11.00000  0.05    0.32
Q27   1   0.9593  0.9177  0.2479  11.00000  0.05    0.31
Q28   1   0.6188  1.1853  0.2116  11.00000  0.05    0.31
Q29   1   0.6051  0.8486 -0.0700  11.00000  0.05    0.29
Q30   1   0.2000  0.7587  0.4909  11.00000  0.05    0.29
Q31   1   0.9100  0.6938 -0.0118  11.00000  0.05    0.28
Q32   1   0.2773  0.5389  0.2639  11.00000  0.05    0.28
Q33   1   0.7848  0.7411  0.0349  11.00000  0.05    0.28
Q34   1   0.6430  0.6921  0.0180  11.00000  0.05    0.28
Q35   1   0.1855  0.7721  0.5016  11.00000  0.05    0.27
Q36   1   0.6141  0.7673  0.0471  11.00000  0.05    0.26
Q37   1   0.9447  0.8413  0.2880  11.00000  0.05    0.26
Q38   1   0.7403  0.8378  0.1300  11.00000  0.05    0.24
Q39   1   0.3177  0.8346  0.0302  11.00000  0.05    0.24
Q40   1   0.5719  0.6518  0.6738  11.00000  0.05    0.24
Q41   1   1.0017  0.7816  0.2293  11.00000  0.05    0.24
Q42   1   0.9477  0.6595  0.0358  11.00000  0.05    0.24
Q43   1   0.2393  0.7220  0.5448  11.00000  0.05    0.23
Q44   1   1.1382  0.4964  0.1016  11.00000  0.05    0.23
Q45   1   0.1936  1.3021  0.2345  11.00000  0.05    0.23
Q46   1   0.8622  0.9382  0.1590  11.00000  0.05    0.23
Q47   1   0.6035  0.6486  0.6124  11.00000  0.05    0.23
Q48   1   0.6622  0.8917 -0.0985  11.00000  0.05    0.23
Q49   1   0.3192  0.6596  0.6640  11.00000  0.05    0.22
Q50   1   0.6733  0.8723  0.1212  11.00000  0.05    0.22
Q51   1   0.5462  0.6748  0.6461  11.00000  0.05    0.22
Q52   1   0.4215  0.8924  0.0501  11.00000  0.05    0.21
Q53   1   0.8260  0.5235  0.3268  11.00000  0.05    0.21
Q54   1   0.2784  0.4258  0.2340  11.00000  0.05    0.21
Q55   1   0.2095  0.6966  0.3566  11.00000  0.05    0.21
Q56   1   0.2240  0.6811  0.3681  11.00000  0.05    0.21
Q57   1   0.7293  0.8343 -0.0899  11.00000  0.05    0.20
Q58   1   0.1587  0.5397  0.2445  11.00000  0.05    0.20
Q59   1   0.1204  0.7696  0.2341  11.00000  0.05    0.20
Q60   1   0.7364  0.7791  0.0001  11.00000  0.05    0.20
;
_shelx_res_checksum                19968
_shelx_hkl_file
;
   0   0  -1  111.37    3.93
   0   0  -1  109.02    3.83
   0   0   1  110.20    3.93
   0   0   1  103.13    3.63
   0   0  -1  103.33    3.93
   0   0  -1  109.31    4.22
   0   0   1  106.86    4.02
   0   0  -2 1002.84   34.83
   0   0  -2 1014.62   35.23
   0   0   2  979.59   34.05
   0   0   2  976.25   33.85
   0   0  -2  950.54   35.52
   0   0  -2  974.88   36.50
   0   0   2  982.24   36.70
   0   0   2  985.18   36.90
   0   0  -3  105.39    4.22
   0   0  -3  107.35    4.02
   0   0   3  106.47    4.22
   0   0   3  104.21    3.83
   0   0  -3  103.23    4.42
   0   0  -3  105.39    4.12
   0   0   3   99.99    4.32
   0   0   3  103.13    4.12
   0   0  -4  101.56    4.51
   0   0  -4  102.54    4.02
   0   0   4  101.36    4.51
   0   0   4  107.06    4.12
   0   0  -4  106.27    4.42
   0   0  -4  101.85    4.91
   0   0   4  114.32    4.71
   0   0   4   99.99    4.91
   0   0  -5  321.36   11.48
   0   0  -5  330.98   12.17
   0   0   5  318.91   11.38
   0   0   5  313.22   11.58
   0   0  -5  322.34   12.36
   0   0  -5  313.32   12.46
   0   0   5  318.52   12.17
   0   0   5  313.32   12.46
   0   0  -6 7479.13  279.36
   0   0  -6 7247.56  270.53
   0   0   6 7380.03  275.54
   0   0   6 7304.47  272.49
   0   0  -7  120.50    4.71
   0   0  -7  113.83    5.10
   0   0   7  126.29    4.91
   0   0   7  112.55    5.00
   0   0  -7  127.07    5.20
   0   0  -7  126.68    5.99
   0   0   7  121.68    5.79
   0   0   7  125.40    5.20
   0   0  -8 2250.02   78.11
   0   0  -8 2412.91   84.09
   0   0   8 2277.50   79.38
   0   0   8 2385.43   82.82
   0   0  -8 2455.10   92.14
   0   0  -8 2316.75   86.64
   0   0   8 2408.98   90.08
   0   0   8 2490.43   93.51
   0   0  -9  669.90   25.91
   0   0  -9  639.88   24.24
   0   0   9  659.99   25.61
   0   0   9  632.52   23.94
   0   0 -10   81.35    4.61
   0   0 -10   71.04    3.43
   0   0  10   71.14    4.32
   0   0  10   70.55    3.43
   0   0 -10   78.30    3.73
   0   0 -10   68.20    4.81
   0   0  10   79.68    5.20
   0   0  10   70.65    3.53
   0   0 -11  452.95   16.29
   0   0 -11  479.93   17.76
   0   0  11  479.05   17.17
   0   0  11  445.88   16.68
   0   0 -11  482.78   19.23
   0   0 -11  488.27   18.74
   0   0  11  475.71   19.13
   0   0  11  472.67   18.15
   0   0 -12  114.61    4.91
   0   0 -12  118.05    5.79
   0   0  12  126.78    6.28
   0   0  12  124.03    5.20
   0   0 -12  127.86    6.77
   0   0 -12  123.34    5.40
   0   0  12  130.21    5.59
   0   0  12  118.34    6.48
   0   0 -13   95.18    5.20
   0   0 -13   86.94    4.12
   0   0  13   92.53    4.22
   0   0  13   92.83    5.30
   0   0 -13   88.80    5.59
   0   0  13   82.03    4.02
   0   0 -14   16.49    3.04
   0   0 -14   14.82    2.16
   0   0  14   10.99    3.34
   0   0  14   14.82    1.86
   0   0 -14   11.58    1.86
   0   0  14   14.03    3.83
   0   0 -15   16.19    2.36
   0   0 -15   14.82    3.24
   0   0  15   14.23    1.96
   0   0  15   16.39    3.63
   0   0 -15   17.56    3.93
   0   0 -15   12.36    2.06
   0   0  15   14.72    3.63
   0   0  15   17.86    1.96
   0   0 -16    0.79    3.24
   0   0 -16   -0.88    2.45
   0   0  16   -1.47    1.77
   0   0  16    3.24    3.63
   0   0 -16    0.79    1.96
   0   0 -16   -5.20    3.63
   0   0  16    5.10    3.73
   0   0  16    0.79    1.57
   0   0  17   62.51    3.53
   0   0  17   64.76    5.10
   0   0 -17   57.60    3.43
   0   0 -17   69.18    5.30
   0   0  17   61.52    3.24
   0   0  17   59.76    4.91
   0   0 -18    2.65    3.34
   0   0 -18    0.49    3.53
   0   0  18   10.30    3.63
   0   0  18    9.32    2.06
   0   0 -18   10.01    3.73
   0   0 -18    5.40    1.86
   0   0  18    8.83    1.67
   0   0  18   10.11    3.63
   0   0 -19   34.34    5.10
   0   0 -19   43.96    4.71
   0   0  19   41.41    4.12
   0   0  19   38.17    3.14
   0   0 -19   45.14    3.04
   0   0 -19   40.72    4.42
   0   0  19   38.56    2.45
   0   0  19   38.96    4.51
   0   0 -20   -3.14    3.63
   0   0 -20   -8.05    3.83
   0   0  20    0.98    2.65
   0   0  20    1.37    3.43
   0   0 -20    3.43    1.86
   0   0 -20   -1.86    2.65
   0   0  20    1.86    1.28
   0   0  20    0.49    2.65
   0   0 -21    3.34    3.43
   0   0 -21   -1.77    2.65
   0   0  21   -0.98    3.34
   0   0  21   -1.77    3.14
   0   0 -21    0.79    1.57
   0   0 -21   -4.22    1.86
   0   0  21    1.47    1.28
   0   0  21   -2.45    1.96
   0  -1  21    2.75    2.85
   0  -1  21   -4.32    2.94
   0   1 -21    2.45    2.55
   0   1 -21   -2.45    3.24
   0  -1  21    0.88    1.96
   0  -1  21   -1.86    1.18
   0   1 -21   -0.98    1.96
   0   1 -21    0.88    1.57
   0  -1  20    0.20    3.34
   0  -1  20   -1.77    2.65
   0   1 -20    0.00    3.53
   0   1 -20   -0.88    3.63
   0  -1  20    2.26    2.16
   0  -1  20    1.67    1.18
   0   1 -20    2.55    1.57
   0   1 -20    0.20    2.26
   0  -1  19   10.50    3.43
   0  -1  19   14.23    2.45
   0   1 -19    5.40    4.02
   0  -1  19    9.52    3.53
   0  -1  19   13.74    1.47
   0   1 -19   13.93    2.94
   0   1 -19   14.13    2.16
   0  -1  18    2.45    3.34
   0  -1  18    0.88    2.06
   0   1 -18   -5.20    3.63
   0   1 -18    0.00    3.34
   0  -1  18    4.81    3.43
   0  -1  18    4.32    1.28
   0   1 -18   -0.88    1.86
   0   1 -18    3.83    2.94
   0  -1  17    2.94    3.63
   0  -1  17    9.03    1.96
   0   1 -17    4.51    3.34
   0   1 -17    3.04    2.94
   0  -1  17    5.89    3.43
   0  -1  17    4.42    1.47
   0   1 -17    4.32    3.14
   0   1 -17    5.59    1.86
   0  -1  16   -1.18    4.12
   0  -1  16    0.79    1.77
   0   1 -16    1.47    3.14
   0  -1  16    0.10    1.37
   0  -1  16   -1.08    3.63
   0   1 -16   -3.93    3.04
   0   1 -16    0.20    1.86
   0  -1  15   -0.49    3.34
   0  -1  15   -2.75    1.67
   0   1 -15    1.08    2.16
   0   1 -15    0.10    2.85
   0  -1  15   -1.18    3.63
   0   1 -15   -3.04    1.77
   0  -1  14   18.84    3.04
   0  -1  14   16.98    1.96
   0   1 -14   12.46    2.94
   0   1 -14   17.86    2.06
   0  -1  14   14.62    1.77
   0   1 -14   19.04    3.53
   0  -1  13   15.41    3.04
   0  -1  13   15.60    1.86
   0   1 -13   18.84    2.85
   0   1 -13   19.63    2.06
   0  -1  13   15.31    3.73
   0  -1  13   16.39    1.77
   0   1 -13   14.13    3.34
   0   1 -13   17.37    1.96
   0  -1  12   13.15    2.85
   0  -1  12   13.93    1.77
   0   1 -12   15.50    2.65
   0   1 -12   13.93    1.86
   0  -1  12   17.56    1.67
   0  -1  12   16.68    3.63
   0   1 -12   16.09    3.14
   0   1 -12   19.23    2.06
   0  -1  11  392.50   14.72
   0  -1  11  412.42   14.92
   0   1 -11  417.82   15.60
   0   1 -11  411.74   14.92
   0  -1  11  429.10   16.39
   0  -1  11  424.49   17.07
   0   1 -11  414.58   15.99
   0   1 -11  426.55   16.88
   0  -1  10  669.90   24.14
   0  -1  10  678.93   24.04
   0   1 -10  689.43   24.83
   0   1 -10  656.85   23.26
   0  -1  10  703.17   27.28
   0  -1  10  681.97   25.81
   0   1 -10  690.12   26.10
   0   1 -10  680.50   26.20
   0  -1   9   38.56    2.16
   0  -1   9   38.27    3.83
   0   1  -9   42.88    2.45
   0   1  -9   39.54    3.34
   0  -1   8   60.54    3.73
   0  -1   8   57.80    2.85
   0   1  -8   57.40    3.43
   0   1  -8   57.50    2.85
   0  -1   8   49.55    3.73
   0  -1   8   59.66    2.75
   0   1  -8   56.23    3.53
   0   1  -8   53.38    2.65
   0  -1   7   13.35    2.36
   0  -1   7   14.33    1.57
   0   1  -7   13.05    2.16
   0   1  -7   14.03    1.57
   0  -1   7   10.40    2.65
   0  -1   7   10.79    1.28
   0   1  -7   10.01    1.37
   0   1  -7    8.54    2.26
   0  -1   6  950.15   33.46
   0  -1   6  951.92   33.26
   0   1  -6  988.12   34.74
   0   1  -6  952.51   33.26
   0  -1   6  944.85   35.42
   0  -1   6  980.96   37.09
   0   1  -6 1089.19   40.82
   0   1  -6  960.94   36.21
   0  -1   5 2191.15   76.24
   0  -1   5 2201.94   76.34
   0   1  -5 2241.19   77.91
   0   1  -5 2236.28   77.52
   0  -1   5 2203.90   82.52
   0  -1   5 2200.96   82.23
   0   1  -5 2200.96   82.43
   0   1  -5 2223.53   83.11
   0  -1   4  253.75    9.42
   0  -1   4  242.57    8.73
   0   1  -4  249.34    9.22
   0   1  -4  248.36    8.93
   0  -1   4  252.38   10.01
   0  -1   4  251.89    9.62
   0   1  -4  246.00    9.62
   0   1  -4  261.31   10.01
   0  -1   3 2720.04   94.10
   0  -1   3 2821.11   97.83
   0   1  -3 2786.77   96.56
   0   1  -3 2700.42   93.51
   0  -1   3 2633.69   98.32
   0  -1   3 2658.22   99.30
   0   1  -3 2722.00  101.66
   0   1  -3 2739.67  102.25
   0  -1   2   58.48    2.45
   0   1  -2   61.13    2.36
   0   1  -2   60.25    2.55
   0  -1   2   56.81    2.36
   0  -1   2   57.50    2.26
   0   1  -2   57.70    2.26
   0   1  -2   57.50    2.26
   0  -1   1   48.77    1.96
   0  -1   1   49.06    1.86
   0   1  -1   49.36    1.86
   0   1  -1   51.71    2.06
   0  -1   1   43.08    1.67
   0  -1   1   45.53    1.77
   0   1  -1   44.55    1.77
   0   1  -1   45.33    1.77
   0  -1   0    2.65    0.49
   0  -1   0    2.45    0.39
   0   1   0    1.96    0.39
   0   1   0    1.96    0.39
   0  -1   0    2.26    0.29
   0  -1   0    2.36    0.49
   0   1   0    2.16    0.49
   0   1   0    2.16    0.29
   0  -1  -1 1882.05   65.06
   0  -1  -1 1810.42   62.60
   0   1   1 1864.39   64.57
   0   1   1 1855.56   64.17
   0  -1  -1 1944.85   72.71
   0  -1  -1 1913.45   71.44
   0   1   1 1981.16   73.99
   0   1   1 1978.21   73.89
   0  -1  -2  118.05    4.42
   0  -1  -2  122.76    4.42
   0   1   2  123.15    4.61
   0   1   2  118.83    4.32
   0  -1  -2  119.52    4.61
   0  -1  -2  122.17    5.00
   0   1   2  118.73    4.81
   0   1   2  119.71    4.61
   0  -1  -3  849.67   29.54
   0  -1  -3  897.26   31.30
   0   1   3  905.70   31.60
   0   1   3  928.17   32.28
   0  -1  -3  898.73   33.85
   0  -1  -3  868.31   32.58
   0   1   3  846.14   31.69
   0   1   3  886.17   33.36
   0  -1  -4 2545.38   88.31
   0  -1  -4 2427.63   84.09
   0   1   4 2472.77   85.76
   0   1   4 2559.12   88.61
   0  -1  -4 2475.71   92.53
   0  -1  -4 2512.02   94.10
   0   1   4 2480.62   92.63
   0   1   4 2520.85   94.40
   0  -1  -5  273.28    9.91
   0  -1  -5  261.60    9.91
   0  -1  -5  280.93   10.89
   0  -1  -5  268.18   10.99
   0   1   5  261.50   10.21
   0   1   5  268.18   10.99
   0  -1  -6 8259.23  285.84
   0  -1  -6 8105.18  280.34
   0   1   6 8169.94  282.70
   0   1   6 8057.09  278.68
   0  -1  -7  240.02    8.83
   0  -1  -7  247.18    9.42
   0   1   7  247.28    9.52
   0   1   7  241.09    8.83
   0  -1  -7  251.79    9.81
   0  -1  -7  243.74   10.21
   0   1   7  265.82   10.40
   0   1   7  248.06   10.30
   0  -1  -8 1167.69   41.11
   0  -1  -8 1107.84   38.66
   0   1   8 1137.28   40.04
   0   1   8 1116.67   39.05
   0  -1  -8 1136.29   43.18
   0  -1  -8 1111.76   41.80
   0   1   8 1181.43   44.84
   0   1   8 1132.37   42.59
   0  -1  -9   33.17    3.53
   0  -1  -9   42.78    2.55
   0  -1  -9   42.10    4.32
   0   1   9   36.90    2.55
   0   1   9   41.90    4.02
   0  -1 -10  274.75   10.79
   0  -1 -10  267.69    9.91
   0   1  10  282.21   11.19
   0   1  10  255.91    9.52
   0  -1 -10  256.50   11.28
   0  -1 -10  275.73   10.89
   0   1  10  281.72   11.87
   0   1  10  272.00   10.70
   0  -1 -11   39.64    2.75
   0  -1 -11   35.42    3.34
   0   1  11   34.15    2.36
   0   1  11   34.15    3.83
   0  -1 -11   32.38    2.45
   0  -1 -11   34.54    4.42
   0   1  11   34.54    2.55
   0   1  11   35.82    3.93
   0  -1 -12 1213.81   43.08
   0  -1 -12 1201.06   42.10
   0   1  12 1208.91   42.88
   0   1  12 1178.49   41.31
   0  -1 -12 1336.47   51.03
   0   1  12 1180.45   44.55
   0  -1 -13   21.39    3.04
   0  -1 -13   19.23    2.26
   0   1  13   24.14    3.53
   0   1  13   19.33    2.06
   0  -1 -13   22.18    2.16
   0   1  13   15.31    3.63
   0  -1 -14  458.54   17.37
   0  -1 -14  444.12   16.19
   0   1  14  429.30   16.29
   0   1  14  433.42   15.80
   0  -1 -14  425.67   17.66
   0  -1 -14  440.09   17.07
   0   1  14  422.53   17.27
   0   1  14  435.38   16.88
   0  -1 -15   15.01    3.24
   0  -1 -15   15.31    2.36
   0   1  15   11.48    3.53
   0   1  15    9.71    1.86
   0  -1 -15   18.15    4.22
   0  -1 -15   15.01    2.06
   0   1  15   12.17    1.96
   0   1  15   12.07    3.53
   0  -1 -16    8.44    3.43
   0  -1 -16    7.65    2.55
   0   1  16    4.61    3.73
   0   1  16    5.10    1.86
   0  -1 -16    5.69    1.96
   0  -1 -16    4.22    4.12
   0   1  16    5.20    3.73
   0   1  16    2.85    1.86
   0  -1 -17   15.41    3.04
   0   1  17   10.99    2.16
   0   1  17    5.50    3.83
   0  -1 -17    9.52    3.93
   0  -1 -17    7.75    2.16
   0   1  17   11.58    1.96
   0   1  17   15.99    3.83
   0   1  18   52.69    4.71
   0   1  18   57.80    3.43
   0  -1 -18   51.71    5.00
   0  -1 -18   49.46    3.14
   0   1  18   58.78    3.24
   0   1  18   49.16    4.61
   0  -1 -19   -2.06    4.02
   0  -1 -19    3.14    3.63
   0   1  19    0.20    3.34
   0   1  19    3.43    2.16
   0  -1 -19   -0.49    3.73
   0  -1 -19    2.26    1.86
   0   1  19    0.59    1.57
   0   1  19    3.93    3.63
   0  -1 -21    0.20    3.43
   0  -1 -21    4.51    2.75
   0   1  21    0.59    3.24
   0   1  21   -0.49    3.34
   0  -1 -21    0.79    1.67
   0  -1 -21    1.96    2.45
   0   1  21   -0.98    1.47
   0   1  21    1.28    2.16
   0  -2  20    1.28    3.04
   0  -2  20   -0.59    3.04
   0   2 -20   -2.75    3.43
   0   2 -20   -1.08    2.65
   0  -2  20    0.59    1.96
   0  -2  20    0.00    0.88
   0   2 -20   -0.10    1.37
   0   2 -20    0.39    1.96
   0  -2  19   -0.10    3.24
   0  -2  19    4.32    2.26
   0   2 -19   -0.98    3.63
   0   2 -19   -0.79    3.34
   0  -2  19    1.18    0.98
   0  -2  19    2.75    2.85
   0   2 -19    0.49    1.77
   0   2 -19    2.85    1.96
   0  -2  18    8.34    2.26
   0  -2  18   12.17    3.53
   0   2 -18    6.77    3.83
   0   2 -18   -1.96    3.53
   0  -2  18   14.03    3.63
   0  -2  18    9.62    1.28
   0   2 -18    9.62    2.36
   0   2 -18    6.18    2.06
   0  -2  17   10.50    1.96
   0  -2  17    9.52    3.34
   0   2 -17   10.89    2.85
   0   2 -17    9.71    3.43
   0  -2  17    7.75    3.53
   0  -2  17   13.25    1.47
   0   2 -17    9.81    1.96
   0   2 -17   14.23    2.55
   0   2 -16   28.75    2.45
   0  -2  15    3.14    2.85
   0  -2  15    3.43    1.67
   0   2 -15    3.14    2.06
   0   2 -15   -0.49    2.85
   0   2 -15   -2.85    2.45
   0  -2  14   -2.16    2.75
   0  -2  14    0.00    1.57
   0   2 -14   -1.37    2.65
   0   2 -14   -1.86    1.77
   0  -2  14   -0.69    1.28
   0  -2  14   -3.43    3.63
   0   2 -14   -1.77    2.45
   0   2 -14    1.28    1.77
   0  -2  13    2.36    1.47
   0  -2  13    3.63    2.65
   0   2 -13    3.53    2.55
   0   2 -13    0.20    1.67
   0  -2  13    2.06    1.28
   0  -2  13    3.04    3.73
   0   2 -13    0.49    1.77
   0   2 -13   -0.29    2.36
   0  -2  12  106.37    5.40
   0  -2  12   99.70    4.42
   0   2 -12  101.76    4.51
   0   2 -12   99.30    5.10
   0  -2  12  100.09    5.79
   0  -2  12  107.15    4.51
   0   2 -12  101.36    5.00
   0   2 -12   93.51    4.32
   0  -2  11  173.00    6.77
   0  -2  11  167.11    7.26
   0   2 -11  167.21    7.26
   0   2 -11  171.43    6.67
   0  -2  11  166.91    7.85
   0  -2  11  185.26    7.36
   0   2 -11  175.74    7.16
   0   2 -11  176.92    7.56
   0  -2  10   24.04    2.85
   0  -2  10   24.04    2.06
   0   2 -10   27.38    2.16
   0   2 -10   24.92    2.85
   0  -2  10   25.32    1.67
   0  -2  10   26.98    3.43
   0   2 -10   22.86    1.96
   0   2 -10   24.73    2.45
   0  -2   9   47.10    2.65
   0  -2   9   50.14    3.53
   0   2  -9   53.77    3.53
   0   2  -9   45.73    2.55
   0  -2   9   49.36    3.93
   0  -2   9   52.01    2.45
   0   2  -9   53.77    2.75
   0   2  -9   53.77    3.14
   0  -2   8   60.84    2.94
   0   2  -8   59.95    3.53
   0  -2   8   58.19    4.02
   0  -2   8   58.38    2.55
   0   2  -8   60.35    2.94
   0   2  -8   55.34    3.04
   0  -2   7   56.52    3.34
   0  -2   7   57.60    2.75
   0   2  -7   64.57    2.94
   0   2  -7   59.37    3.34
   0   2  -7   59.56    2.94
   0   2  -7   58.58    2.75
   0  -2   6  354.14   12.95
   0  -2   6  339.32   12.17
   0   2  -6  348.35   12.46
   0   2  -6  349.43   12.76
   0  -2   6  351.88   13.25
   0  -2   6  368.76   14.33
   0   2  -6  376.51   14.23
   0   2  -6  341.77   13.05
   0  -2   5   52.89    2.94
   0  -2   5   53.18    2.45
   0   2  -5   53.18    2.45
   0   2  -5   49.46    2.85
   0  -2   5   45.82    2.75
   0  -2   5   46.61    1.96
   0   2  -5   47.59    2.16
   0   2  -5   46.81    2.26
   0  -2   4  643.90   22.57
   0  -2   4  627.81   22.27
   0   2  -4  610.34   21.39
   0   2  -4  643.31   22.77
   0  -2   4  624.18   23.55
   0  -2   4  626.24   23.45
   0  -2   3  287.21   10.30
   0  -2   3  275.34   10.11
   0  -2   3  267.69   10.21
   0  -2   3  283.29   10.70
   0  -2   2  393.97   13.84
   0  -2   2  413.31   14.62
   0   2  -2  386.91   13.74
   0   2  -2  408.79   14.33
   0  -2   2  402.61   15.11
   0  -2   2  449.12   16.88
   0   2  -2  411.93   15.41
   0   2  -2  410.36   15.41
   0  -2   1    1.86    0.98
   0  -2   1    2.55    0.98
   0   2  -1    0.29    1.08
   0   2  -1    3.04    0.88
   0  -2   1    2.94    0.49
   0  -2   1    1.86    0.79
   0   2  -1    2.45    0.49
   0   2  -1    1.57    0.69
   0  -2   0  155.43    5.59
   0  -2   0  159.26    5.79
   0   2   0  160.44    5.79
   0   2   0  154.74    5.59
   0  -2   0  158.96    6.08
   0  -2   0  155.43    5.99
   0   2   0  164.56    6.38
   0   2   0  151.41    5.79
   0  -2  -1   28.65    1.67
   0  -2  -1   27.08    1.47
   0   2   1   27.87    1.47
   0   2   1   27.97    1.57
   0  -2  -1   29.05    1.37
   0  -2  -1   27.67    1.77
   0   2   1   31.20    1.77
   0   2   1   29.44    1.47
   0  -2  -2  148.17    5.59
   0  -2  -2  156.02    5.69
   0   2   2  154.55    5.59
   0   2   2  158.08    5.99
   0  -2  -2  150.23    5.89
   0  -2  -2  152.78    6.18
   0   2   2  152.78    6.18
   0   2   2  153.96    5.99
   0  -2  -3    7.65    2.45
   0  -2  -3   11.38    1.77
   0   2   3   14.03    1.67
   0   2   3   13.35    2.55
   0  -2  -3   13.44    1.47
   0  -2  -3   10.01    2.45
   0   2   3   11.97    1.57
   0   2   3   11.38    2.36
   0  -2  -4   86.64    4.61
   0  -2  -4   89.29    3.93
   0   2   4   85.47    3.73
   0   2   4   85.17    4.61
   0  -2  -4   92.14    5.20
   0  -2  -4   94.20    4.12
   0   2   4   92.63    4.12
   0   2   4   87.53    4.71
   0  -2  -5    3.93    1.86
   0  -2  -5    3.04    3.04
   0   2   5    3.93    2.94
   0   2   5    6.08    1.86
   0  -2  -5    3.83    3.34
   0  -2  -5    0.20    1.67
   0   2   5    4.81    1.77
   0   2   5    0.88    2.85
   0  -2  -6 2207.83   76.64
   0  -2  -6 2385.43   83.01
   0   2   6 2328.52   80.76
   0   2   6 2251.00   78.30
   0  -2  -6 2262.78   84.68
   0  -2  -6 2361.88   88.71
   0   2   6 2276.51   85.27
   0   2   6 2299.08   86.35
   0  -2  -7   36.01    3.24
   0  -2  -7   34.83    2.26
   0   2   7   28.55    3.14
   0   2   7   31.99    2.16
   0  -2  -7   29.73    3.43
   0  -2  -7   32.48    2.16
   0   2   7   29.54    3.14
   0   2   7   30.71    2.16
   0  -2  -8  222.35    8.83
   0  -2  -8  227.65    8.54
   0   2   8  223.14    8.93
   0   2   8  220.10    8.14
   0  -2  -8  219.90    8.73
   0  -2  -8  215.68    9.42
   0   2   8  211.26    9.13
   0   2   8  216.17    8.64
   0  -2  -9   34.54    2.36
   0  -2  -9   27.57    3.93
   0   2   9   33.36    3.73
   0   2   9   33.66    2.45
   0  -2 -10   65.65    4.42
   0  -2 -10   73.69    3.73
   0   2  10   74.18    4.91
   0   2  10   64.17    3.34
   0  -2 -10   67.02    3.43
   0  -2 -10   68.20    5.30
   0   2  10   71.63    3.73
   0   2  10   68.59    4.81
   0  -2 -11  619.47   22.08
   0  -2 -11  677.85   24.63
   0   2  11  637.62   22.67
   0   2  11  615.15   22.47
   0   2  11  610.44   23.35
   0  -2 -12  628.69   23.06
   0  -2 -12  581.79   20.80
   0   2  12  576.98   21.20
   0   2  12  589.73   21.10
   0  -2 -12  598.66   22.86
   0   2  12  598.17   23.65
   0  -2 -13   29.93    3.53
   0  -2 -13   28.55    2.55
   0   2  13   26.10    3.83
   0   2  13   27.67    2.26
   0  -2 -13   29.14    4.51
   0  -2 -13   27.77    2.26
   0  -2 -14    7.85    2.16
   0  -2 -14   12.17    3.04
   0   2  14   10.50    1.86
   0   2  14    7.65    3.43
   0  -2 -14    5.89    1.77
   0  -2 -14   12.95    4.32
   0   2  14    8.24    3.34
   0   2  14    8.05    2.06
   0  -2 -15   -0.10    2.16
   0  -2 -15    0.59    3.04
   0   2  15    1.47    1.77
   0   2  15    1.18    3.53
   0  -2 -15   -1.08    1.77
   0  -2 -15   -1.96    4.32
   0   2  15    2.94    2.06
   0   2  15    0.10    3.43
   0  -2 -16    9.91    2.65
   0  -2 -16    8.05    3.43
   0   2  16   11.28    3.93
   0   2  16   13.74    2.06
   0  -2 -16   11.78    2.06
   0  -2 -16   20.51    4.61
   0   2  16   13.74    2.26
   0   2  16   14.82    3.83
   0  -2 -17   20.90    3.14
   0   2  17   18.45    3.93
   0  -2 -17   17.27    2.36
   0  -2 -17   12.07    4.22
   0   2  17   19.23    3.93
   0   2  17   20.31    2.36
   0  -2 -18    0.29    3.73
   0  -2 -18   11.87    3.34
   0   2  18   10.79    2.06
   0   2  18   14.33    4.02
   0  -2 -18   12.85    2.16
   0  -2 -18    7.85    4.12
   0   2  18    6.67    3.53
   0   2  18   10.11    1.96
   0  -2 -19    0.49    3.53
   0  -2 -19   -3.83    3.93
   0   2  19   -3.83    1.86
   0   2  19   -3.83    3.24
   0  -2 -19   -1.28    1.86
   0  -2 -19    5.40    3.63
   0   2  19   -2.75    3.43
   0   2  19    2.06    1.67
   0  -2 -20   11.58    4.22
   0  -2 -20    6.57    4.51
   0   2  20   15.21    3.34
   0   2  20   19.63    2.06
   0  -2 -21   -5.50    3.34
   0  -2 -21   -1.77    2.85
   0   2  21    2.75    3.34
   0   2  21   -1.08    3.34
   0  -2 -21   -0.69    1.57
   0  -2 -21    0.39    2.55
   0   2  21    1.08    2.16
   0   2  21   -0.69    1.57
   0  -3  20   -2.06    2.85
   0  -3  20   -1.08    2.36
   0   3 -20    0.20    3.04
   0   3 -20   -7.95    3.34
   0  -3  20   -0.10    1.86
   0  -3  20    1.86    0.98
   0   3 -20    2.06    1.77
   0   3 -20    0.59    1.37
   0  -3  19   33.46    3.73
   0   3 -19   24.04    4.02
   0   3 -19   33.17    4.22
   0   3 -19   32.68    2.55
   0   3 -19   35.62    2.55
   0  -3  18    2.65    1.96
   0  -3  18    2.06    2.94
   0   3 -18    0.20    3.43
   0  -3  18   -2.45    3.14
   0  -3  18   -0.10    0.98
   0   3 -18    1.47    1.86
   0   3 -18   -0.88    1.67
   0  -3  17   11.58    3.24
   0  -3  17   10.99    2.06
   0   3 -17    7.36    3.24
   0   3 -17   10.99    3.04
   0   3 -17    9.52    1.86
   0  -3  16    4.12    3.14
   0  -3  16    1.86    1.86
   0   3 -16    3.34    2.55
   0   3 -16   -1.47    3.14
   0  -3  16    0.39    1.08
   0   3 -16    4.51    1.86
   0  -3  15   51.61    3.14
   0  -3  15   55.44    4.22
   0   3 -15   46.81    4.12
   0   3 -15   44.06    3.24
   0  -3  15   47.79    2.45
   0  -3  15   47.69    4.91
   0   3 -15   48.87    3.14
   0   3 -15   48.38    2.94
   0  -3  14   23.26    3.14
   0  -3  14   19.53    2.06
   0   3 -14   19.23    2.36
   0   3 -14   16.29    3.04
   0  -3  14   20.12    4.02
   0  -3  14   19.92    1.47
   0   3 -14   18.35    2.06
   0   3 -14   17.86    2.16
   0  -3  13   30.12    3.24
   0  -3  13   31.79    2.26
   0   3 -13   31.89    3.14
   0   3 -13   30.03    2.45
   0  -3  13   29.73    1.77
   0  -3  13   33.66    4.02
   0   3 -13   29.34    2.26
   0   3 -13   27.97    2.26
   0  -3  12    2.36    1.47
   0  -3  12    2.55    2.55
   0   3 -12    3.63    2.26
   0   3 -12    2.94    1.67
   0  -3  12    3.43    0.98
   0  -3  12    5.30    3.24
   0   3 -12    0.79    1.47
   0   3 -12    4.71    1.67
   0  -3  11    2.26    1.47
   0  -3  11    1.67    2.36
   0   3 -11    2.45    2.16
   0   3 -11    1.86    1.47
   0  -3  11    2.45    0.98
   0  -3  11    3.34    3.04
   0   3 -11    2.06    1.37
   0   3 -11    3.53    1.47
   0  -3  10  586.79   21.29
   0  -3  10  622.12   22.18
   0   3 -10  615.35   22.27
   0   3 -10  613.58   21.78
   0  -3  10  612.21   23.06
   0  -3  10  631.83   24.43
   0   3 -10  600.14   22.77
   0   3 -10  607.99   23.06
   0  -3   9   10.21    2.45
   0   3  -9    7.65    1.57
   0   3  -9    7.95    2.36
   0  -3   9    9.13    0.98
   0  -3   9    9.13    3.04
   0   3  -9   10.30    1.47
   0   3  -9    9.42    1.57
   0   3  -8  396.43   14.42
   0  -3   8  388.58   14.72
   0  -3   8  398.68   15.70
   0   3  -8  407.81   15.50
   0   3  -8  404.28   15.41
   0  -3   7  230.89    9.03
   0  -3   7  236.09    8.73
   0   3  -7  236.38    9.13
   0   3  -7  238.05    8.73
   0  -3   7  242.76    9.22
   0  -3   7  232.95    9.42
   0  -3   6   35.72    2.26
   0  -3   6   32.09    2.55
   0   3  -6   33.95    2.75
   0   3  -6   39.25    2.16
   0  -3   6   35.03    1.57
   0  -3   6   34.64    2.45
   0   3  -6   33.26    1.67
   0   3  -6   33.17    1.67
   0  -3   5  393.29   14.03
   0  -3   5  403.69   14.62
   0   3  -5  401.82   14.52
   0   3  -5  381.71   13.64
   0  -3   5  386.12   14.52
   0  -3   5  391.32   14.92
   0  -3   4  209.50    7.75
   0  -3   4  203.51    7.85
   0   3  -4  200.57    7.65
   0   3  -4  188.60    7.07
   0  -3   4  202.92    7.75
   0  -3   4  200.47    7.75
   0   3  -4  198.41    7.56
   0   3  -4  198.70    7.56
   0  -3   3 1473.85   51.32
   0  -3   3 1397.31   48.57
   0   3  -3 1453.24   50.53
   0   3  -3 1409.08   49.06
   0  -3   3 1516.04   56.72
   0  -3   3 1403.20   52.50
   0   3  -3 1447.35   54.07
   0   3  -3 1413.99   52.89
   0  -3   2  318.52   11.38
   0  -3   2  305.86   11.09
   0   3  -2  306.45   10.99
   0   3  -2  313.71   11.38
   0  -3   2  329.41   12.46
   0  -3   2  323.23   12.27
   0   3  -2  313.90   11.87
   0   3  -2  331.96   12.56
   0  -3   1  307.92   10.99
   0  -3   1  310.08   11.19
   0   3  -1  312.24   11.28
   0   3  -1  301.93   10.79
   0  -3   1  296.24   11.19
   0  -3   1  299.87   11.48
   0   3  -1  302.72   11.58
   0   3  -1  297.91   11.28
   0  -3   0  398.29   14.13
   0  -3   0  382.10   13.54
   0   3   0  374.05   13.25
   0   3   0  373.56   13.25
   0  -3   0  383.38   14.42
   0  -3   0  365.13   13.93
   0   3   0  388.68   14.82
   0   3   0  367.28   13.93
   0  -3  -1  173.29    6.57
   0  -3  -1  165.83    6.18
   0   3   1  175.06    6.57
   0   3   1  170.44    6.38
   0  -3  -1  166.32    6.48
   0  -3  -1  172.01    7.07
   0   3   1  165.54    6.67
   0   3   1  177.02    6.87
   0  -3  -2  491.51   17.56
   0  -3  -2  492.20   17.37
   0   3   2  473.46   16.68
   0   3   2  498.77   17.66
   0  -3  -2  474.44   17.96
   0  -3  -2  484.05   18.64
   0   3   2  484.15   18.55
   0   3   2  459.62   17.37
   0  -3  -3  660.58   23.26
   0  -3  -3  625.55   22.18
   0   3   3  636.64   22.37
   0   3   3  668.14   23.65
   0  -3  -3  667.74   25.22
   0  -3  -3  665.00   25.41
   0   3   3  662.25   25.32
   0   3   3  656.26   24.83
   0  -3  -4  356.88   13.35
   0  -3  -4  341.38   12.36
   0   3   4  360.22   12.95
   0   3   4  364.44   13.44
   0  -3  -4  328.72   12.66
   0  -3  -4  327.25   13.15
   0   3   4  333.43   13.25
   0   3   4  328.03   12.66
   0  -3  -5  154.94    6.67
   0  -3  -5  157.69    6.18
   0   3   5  150.92    5.89
   0   3   5  151.51    6.57
   0  -3  -5  155.82    6.38
   0  -3  -5  156.90    7.26
   0   3   5  158.28    7.07
   0   3   5  160.83    6.57
   0  -3  -6   67.90    3.24
   0  -3  -6   63.29    4.02
   0   3   6   66.63    3.14
   0   3   6   63.78    3.93
   0  -3  -6   70.26    3.34
   0  -3  -6   59.46    4.42
   0   3   6   59.07    3.93
   0   3   6   65.65    3.24
   0  -3  -7   77.91    4.42
   0  -3  -7   80.27    3.63
   0   3   7   77.81    3.53
   0   3   7   75.85    4.32
   0  -3  -7   74.87    3.53
   0  -3  -7   74.08    4.71
   0   3   7   71.44    4.32
   0   3   7   75.75    3.63
   0  -3  -8   97.63    4.32
   0  -3  -8   90.86    5.00
   0   3   8   99.40    4.32
   0   3   8   93.51    5.00
   0  -3  -8   94.10    4.22
   0  -3  -8   90.08    5.50
   0   3   8   92.83    5.20
   0   3   8   92.34    4.22
   0  -3  -9  339.91   14.23
   0  -3  -9  343.93   13.35
   0   3   9  352.27   14.42
   0   3   9  340.10   13.25
   0  -3 -10   19.33    3.43
   0  -3 -10   19.33    2.36
   0   3  10   11.28    3.73
   0   3  10   13.44    1.96
   0  -3 -10   12.56    4.12
   0  -3 -11   -2.75    3.04
   0  -3 -11    0.98    2.06
   0   3  11   -2.26    3.34
   0   3  11    1.28    1.77
   0  -3 -11    2.45    1.77
   0   3  11    3.83    3.24
   0   3  11   -0.69    1.96
   0  -3 -12   13.54    2.16
   0  -3 -12   16.88    3.24
   0   3  12   11.97    3.34
   0   3  12   12.17    1.86
   0   3  12   10.79    2.06
   0   3  12   12.66    3.43
   0  -3 -13    5.20    2.06
   0  -3 -13    6.57    3.24
   0   3  13    0.59    3.34
   0   3  13    5.30    1.77
   0  -3 -13    5.99    1.77
   0  -3 -13   -1.86    4.12
   0   3  13    1.96    3.24
   0   3  13    3.83    1.96
   0  -3 -14    1.08    3.34
   0  -3 -14    1.18    2.06
   0   3  14    2.94    1.77
   0   3  14    1.28    3.34
   0  -3 -14    2.55    1.67
   0  -3 -14   -0.39    4.22
   0   3  14   -2.85    3.43
   0  -3 -15    0.49    2.16
   0  -3 -15   -1.86    3.43
   0   3  15    5.89    3.53
   0   3  15    3.24    1.86
   0  -3 -15    1.67    4.32
   0  -3 -15    4.12    1.86
   0   3  15    9.52    2.26
   0   3  15    2.55    3.43
   0  -3 -16    8.34    2.45
   0  -3 -16    3.04    3.53
   0   3  16    9.32    2.06
   0   3  16    9.22    3.73
   0  -3 -16    8.64    2.06
   0  -3 -16    3.73    4.32
   0   3  16    4.51    3.83
   0   3  16    7.95    2.16
   0  -3 -17    3.73    2.85
   0   3  17    0.39    3.73
   0   3  17    2.36    2.06
   0  -3 -17    4.71    4.32
   0  -3 -17    1.28    1.96
   0   3  17    6.28    3.63
   0   3  17    4.12    2.16
   0  -3 -18    1.67    3.73
   0  -3 -18    4.42    3.14
   0   3  18    9.52    4.12
   0   3  18   10.99    2.16
   0  -3 -18    6.18    1.96
   0  -3 -18    5.69    4.32
   0   3  18    7.26    3.43
   0   3  18   10.60    2.16
   0  -3 -19    3.04    4.12
   0  -3 -19    2.85    3.73
   0   3  19    2.65    3.63
   0   3  19    8.64    2.16
   0  -3 -19    3.04    1.96
   0  -3 -19    5.59    3.53
   0   3  19    6.18    1.86
   0   3  19   -0.79    3.43
   0  -3 -20   -2.85    3.83
   0  -3 -20    0.39    4.02
   0   3  20    1.18    2.36
   0   3  20    5.50    3.43
   0  -3 -20   -2.36    1.86
   0  -3 -20   -0.10    3.34
   0   3  20   -1.18    2.94
   0   3  20    1.18    1.67
   0  -3 -21    0.20    3.14
   0   3  21    3.34    3.43
   0   3  21   -2.45    3.04
   0  -4  19    2.36    2.85
   0  -4  19   -0.79    2.85
   0   4 -19   -0.59    3.14
   0   4 -19   -2.16    3.14
   0  -4  19   -1.86    1.67
   0  -4  19   -0.20    0.79
   0   4 -19    1.28    1.47
   0  -4  18   18.35    2.94
   0  -4  18   25.51    3.53
   0   4 -18   11.78    3.53
   0   4 -18   15.50    3.93
   0  -4  17    9.32    2.26
   0  -4  17   17.96    3.53
   0   4 -17   10.70    3.24
   0  -4  16   35.91    4.02
   0  -4  16   37.09    2.85
   0   4 -16   23.26    4.02
   0   4 -16   26.69    3.24
   0   4 -16   37.68    2.65
   0  -4  15    2.55    3.53
   0  -4  15    1.67    0.98
   0   4 -15    0.98    1.96
   0  -4  14   18.55    2.26
   0  -4  14   17.56    3.14
   0   4 -14   14.13    3.34
   0   4 -14   10.50    2.26
   0  -4  14   15.60    1.28
   0  -4  14    7.75    3.73
   0   4 -14   14.62    1.96
   0  -4  13  110.29    4.91
   0  -4  13  108.72    5.50
   0   4 -13  112.35    4.91
   0  -4  12   11.97    1.96
   0  -4  12   11.87    2.65
   0   4 -12   13.25    1.86
   0   4 -12   15.70    2.94
   0  -4  12   15.11    1.18
   0  -4  12   14.42    3.34
   0   4 -12   10.60    1.18
   0   4 -12   13.54    1.67
   0  -4  11  139.83    5.79
   0  -4  11  139.14    6.28
   0  -4  10   -2.26    2.26
   0  -4  10   -1.86    1.67
   0   4 -10    0.29    2.36
   0   4 -10   -0.88    1.47
   0  -4  10    1.47    0.88
   0  -4  10    2.65    2.94
   0   4 -10   -0.79    1.47
   0   4 -10    1.96    0.98
   0  -4   9    8.05    1.86
   0  -4   9    8.64    2.36
   0   4  -9    6.08    1.57
   0   4  -9    6.87    2.45
   0  -4   9    4.91    0.88
   0  -4   9    9.42    2.94
   0   4  -9    6.08    1.08
   0   4  -9    7.85    1.47
   0  -4   8   42.49    2.65
   0  -4   8   37.78    2.94
   0   4  -8   42.29    3.14
   0   4  -8   40.53    2.36
   0  -4   8   39.94    1.86
   0  -4   8   35.91    3.04
   0   4  -8   46.71    2.16
   0   4  -8   42.98    2.06
   0  -4   7  542.44   20.41
   0  -4   7  558.92   21.29
   0   4  -7  565.89   21.29
   0   4  -7  537.73   20.21
   0  -4   6    4.91    1.96
   0  -4   6    6.38    1.67
   0   4  -6    3.24    1.28
   0   4  -6    3.73    2.36
   0  -4   6    1.77    1.47
   0  -4   6    4.42    0.88
   0   4  -6    2.85    0.69
   0   4  -6    2.75    0.79
   0  -4   5  322.24   11.68
   0  -4   5  334.90   12.46
   0   4  -5  291.33   10.70
   0   4  -5  334.71   12.27
   0  -4   5  334.80   12.76
   0  -4   5  317.14   12.07
   0   4  -5  323.23   12.17
   0   4  -5  318.32   12.07
   0  -4   4  185.75    7.26
   0  -4   4  190.85    7.16
   0   4  -4  182.81    7.07
   0   4  -4  195.96    7.26
   0  -4   4  198.02    7.65
   0  -4   4  208.71    7.95
   0   4  -4  204.79    7.75
   0   4  -4  203.81    7.75
   0  -4   3   55.74    2.65
   0  -4   3   54.56    3.04
   0   4  -3   54.07    2.65
   0   4  -3   55.74    2.85
   0  -4   3   56.03    2.55
   0  -4   3   54.26    2.26
   0   4  -3   55.83    2.36
   0   4  -3   55.15    2.36
   0  -4   2 1709.35   59.46
   0  -4   2 1722.10   59.86
   0   4  -2 1752.52   60.94
   0   4  -2 1658.32   57.60
   0  -4   2 1668.14   62.41
   0  -4   2 1696.59   63.39
   0   4  -2 1704.44   63.68
   0   4  -2 1688.74   63.19
   0  -4   1 2175.44   75.56
   0  -4   1 2047.88   71.04
   0   4  -1 2127.36   73.89
   0   4  -1 2115.59   73.40
   0  -4   1 2060.64   77.13
   0  -4   1 2036.11   76.05
   0   4  -1 2068.49   77.32
   0   4  -1 2041.99   76.44
   0  -4   0  190.56    7.26
   0  -4   0  197.13    7.56
   0   4   0  194.78    7.36
   0   4   0  183.40    6.97
   0  -4   0  201.75    7.85
   0  -4   0  183.30    7.56
   0   4   0  197.62    7.65
   0   4   0  198.31    7.95
   0  -4  -1   -1.08    2.16
   0  -4  -1   -6.48    2.75
   0   4   1   -2.26    2.45
   0   4   1    1.37    2.26
   0  -4  -1    3.34    1.47
   0  -4  -1   -1.18    2.55
   0   4   1    1.67    1.57
   0   4   1    2.16    2.26
   0  -4  -2  578.55   20.51
   0  -4  -2  559.81   19.92
   0   4   2  571.97   20.31
   0   4   2  536.26   18.94
   0  -4  -2  552.74   21.29
   0  -4  -2  539.69   20.41
   0   4   2  539.00   20.70
   0   4   2  539.49   20.41
   0  -4  -3 1967.42   68.49
   0  -4  -3 1772.15   61.52
   0   4   3 1810.42   62.90
   0   4   3 1927.19   66.92
   0  -4  -3 1873.22   70.36
   0  -4  -3 1855.56   69.47
   0   4   3 1844.76   69.28
   0   4   3 1858.50   69.57
   0  -4  -4 1514.08   52.89
   0  -4  -4 1558.23   54.17
   0   4   4 1611.22   56.13
   0   4   4 1569.03   54.56
   0  -4  -4 1606.32   60.54
   0  -4  -4 1580.80   59.27
   0   4   4 1610.24   60.64
   0   4   4 1570.01   58.88
   0  -4  -5   58.88    4.02
   0  -4  -5   65.25    3.24
   0   4   5   60.25    3.14
   0   4   5   55.34    3.63
   0  -4  -5   60.05    4.12
   0  -4  -5   63.19    3.04
   0   4   5   64.47    4.02
   0   4   5   65.55    3.24
   0  -4  -6  190.66    7.26
   0  -4  -6  199.10    8.14
   0   4   6  194.19    7.36
   0   4   6  188.99    7.65
   0  -4  -6  189.77    7.56
   0  -4  -6  194.58    8.64
   0   4   6  194.39    8.44
   0   4   6  195.07    7.85
   0  -4  -7  279.56   10.30
   0  -4  -7  279.27   10.89
   0   4   7  277.30   10.70
   0   4   7  284.66   10.40
   0  -4  -7  272.59   10.70
   0  -4  -7  278.48   11.78
   0   4   7  284.96   11.78
   0   4   7  279.66   10.99
   0  -4  -8   19.43    3.83
   0   4   8   17.07    2.26
   0  -4  -8   18.06    3.83
   0  -4  -8   22.18    2.06
   0   4   8   21.29    3.43
   0   4   8   20.80    2.16
   0  -4  -9   43.47    4.51
   0  -4  -9   45.24    3.04
   0   4   9   54.85    4.51
   0   4   9   49.55    3.04
   0  -4 -10   -0.98    2.16
   0  -4 -10    1.47    3.73
   0   4  10    1.08    2.06
   0   4  10    3.43    3.63
   0  -4 -10   -5.79    4.02
   0  -4 -10    4.42    1.77
   0   4  10    0.20    2.06
   0   4  10    0.59    3.43
   0  -4 -11  102.35    4.71
   0  -4 -11   99.50    5.79
   0   4  11   95.08    4.42
   0   4  11   97.34    5.59
   0  -4 -11   90.86    6.18
   0  -4 -11   98.22    4.61
   0   4  11   94.40    4.61
   0   4  11   90.28    5.69
   0  -4 -12   40.04    4.02
   0  -4 -12   47.69    3.14
   0   4  12   47.10    4.32
   0   4  12   45.53    2.85
   0  -4 -12   45.53    2.85
   0  -4 -12   47.00    5.00
   0   4  12   42.00    4.32
   0   4  12   42.88    2.94
   0  -4 -13   14.52    3.43
   0  -4 -13   17.86    2.36
   0   4  13   11.78    1.96
   0   4  13    6.38    3.53
   0  -4 -13    9.13    4.51
   0   4  13   12.56    2.16
   0   4  13   14.23    3.63
   0  -4 -14    6.77    2.16
   0  -4 -14    7.85    3.43
   0   4  14    7.26    1.86
   0   4  14   15.41    3.63
   0  -4 -14   11.38    4.61
   0  -4 -14    6.38    1.86
   0   4  14    5.59    2.16
   0   4  14    5.50    3.43
   0   4  15   38.86    2.85
   0   4  15   31.20    4.12
   0  -4 -15   33.66    2.55
   0  -4 -15   33.46    5.00
   0   4  15   31.20    2.85
   0   4  15   35.42    4.32
   0  -4 -16    1.67    3.83
   0  -4 -16   -3.63    2.55
   0   4  16    1.37    2.06
   0   4  16   -2.45    3.73
   0  -4 -16    3.63    4.42
   0  -4 -16    2.16    1.86
   0   4  16    0.00    2.16
   0   4  16    2.55    3.83
   0  -4 -17    0.79    4.12
   0  -4 -17    3.53    2.94
   0   4  17    4.81    2.16
   0   4  17    3.73    4.02
   0  -4 -17    0.79    1.96
   0  -4 -17   -1.47    4.42
   0   4  17    1.08    2.16
   0   4  17    3.04    3.43
   0  -4 -18    0.00    3.24
   0  -4 -18    0.29    3.83
   0   4  18   -1.47    1.96
   0   4  18   -1.96    4.32
   0  -4 -18    1.86    1.86
   0  -4 -18    0.00    4.42
   0   4  18   -0.49    2.06
   0   4  18   -2.55    3.14
   0  -4 -19    1.57    4.02
   0  -4 -19   15.11    4.12
   0   4  19    8.14    3.83
   0   4  19   10.89    2.36
   0  -4 -19   13.35    3.93
   0  -4 -19   11.28    2.16
   0   4  19   15.01    2.26
   0   4  19   17.56    3.63
   0  -4 -20    4.91    4.02
   0  -4 -20    1.77    4.22
   0   4  20    3.24    2.55
   0   4  20    2.75    3.53
   0  -4 -21   -3.24    3.34
   0   4  21    0.88    3.63
   0   4  21    2.94    3.04
   0  -4 -21   -2.55    1.67
   0  -4 -21    1.77    2.16
   0   4  21    1.77    2.26
   0   4  21    6.28    1.86
   0  -5  19   10.40    3.04
   0  -5  19    1.28    2.85
   0   5 -19    5.00    3.24
   0   5 -19    0.59    2.94
   0  -5  18    9.13    3.04
   0  -5  18    8.73    3.24
   0   5 -18    8.44    3.53
   0   5 -18   10.89    3.43
   0   5 -18   11.68    1.37
   0   5 -18   10.40    1.86
   0  -5  17    2.16    2.36
   0  -5  17    3.34    3.14
   0   5 -17   -3.24    3.53
   0  -5  17    3.04    0.79
   0  -5  17    0.20    2.55
   0   5 -17   -0.59    1.67
   0   5 -17    2.06    1.18
   0  -5  16    3.04    2.06
   0  -5  16    1.47    3.34
   0   5 -16    1.37    2.75
   0   5 -16    2.85    3.34
   0  -5  16    0.39    2.75
   0  -5  16    5.99    0.88
   0   5 -16    5.99    1.28
   0   5 -16    5.59    1.86
   0  -5  15   12.95    2.26
   0  -5  15   16.58    3.43
   0   5 -15    7.65    3.43
   0   5 -15   10.89    2.65
   0  -5  15   13.84    1.18
   0  -5  15   13.54    3.63
   0   5 -15   10.11    1.96
   0   5 -15   11.48    1.37
   0  -5  14   17.66    2.36
   0  -5  14   10.79    3.04
   0   5 -14   14.52    2.65
   0   5 -14   13.74    3.43
   0  -5  14   20.41    3.83
   0  -5  14   18.15    1.28
   0   5 -14   16.68    1.96
   0   5 -14   18.25    1.47
   0  -5  13    8.73    2.06
   0  -5  13   10.40    2.65
   0   5 -13    8.44    3.04
   0   5 -13    8.93    1.96
   0  -5  13    7.65    0.98
   0  -5  13    3.04    3.34
   0   5 -13    8.44    1.18
   0   5 -13    8.14    1.67
   0  -5  12    9.32    1.96
   0  -5  12    7.95    2.55
   0   5 -12    9.81    1.86
   0   5 -12    4.61    2.75
   0  -5  12    8.24    0.98
   0  -5  12    6.18    3.24
   0   5 -12    8.64    1.18
   0   5 -12    7.75    1.86
   0  -5  11   44.45    3.43
   0  -5  11   46.12    2.85
   0   5 -11   47.98    2.75
   0   5 -11   47.79    3.63
   0  -5  11   45.82    2.16
   0  -5  11   42.49    3.73
   0  -5  10  196.05    7.65
   0  -5  10  199.19    8.24
   0   5 -10  193.21    7.95
   0   5 -10  202.14    7.75
   0  -5  10  202.83    8.73
   0  -5  10  192.03    7.46
   0   5 -10  194.19    7.56
   0   5 -10  194.48    7.65
   0  -5   9   37.78    3.04
   0  -5   9   39.35    2.55
   0   5  -9   30.81    2.16
   0   5  -9   38.37    3.14
   0  -5   9   39.94    1.96
   0  -5   9   39.64    2.94
   0   5  -9   37.19    1.77
   0   5  -9   38.47    1.96
   0  -5   8  694.83   24.63
   0  -5   8  704.44   25.32
   0   5  -8  675.10   23.94
   0   5  -8  720.05   25.81
   0  -5   8  721.91   27.18
   0  -5   8  712.78   27.08
   0   5  -8  678.34   25.51
   0   5  -8  687.27   25.91
   0  -5   7    2.45    2.06
   0  -5   7    0.59    1.77
   0   5  -7   -1.28    2.45
   0   5  -7   -0.39    1.47
   0  -5   7   -0.59    1.57
   0  -5   7    0.59    0.98
   0   5  -7    0.69    0.79
   0   5  -7   -0.10    0.69
   0  -5   6  136.20    5.40
   0  -5   6  136.89    5.50
   0   5  -6  141.79    5.50
   0   5  -6  139.63    5.40
   0  -5   5   36.90    2.36
   0  -5   5   38.86    3.04
   0   5  -5   38.47    2.36
   0   5  -5   34.15    2.55
   0  -5   5   39.15    2.06
   0  -5   5   39.45    1.96
   0   5  -5   39.45    1.86
   0   5  -5   38.96    1.77
   0  -5   4  223.43    8.54
   0  -5   4  207.63    7.75
   0   5  -4  220.68    8.34
   0   5  -4  207.83    7.75
   0  -5   4  201.45    7.85
   0  -5   4  215.78    8.24
   0   5  -4  203.51    7.75
   0   5  -4  196.64    7.56
   0  -5   3  118.05    4.91
   0  -5   3  128.15    5.10
   0   5  -3  123.25    4.91
   0   5  -3  126.48    5.20
   0  -5   3  124.72    4.91
   0  -5   3  120.69    5.00
   0   5  -3  125.80    5.00
   0   5  -3  125.11    4.91
   0  -5   2  637.52   22.47
   0  -5   2  639.48   22.67
   0   5  -2  630.75   22.18
   0   5  -2  653.52   23.06
   0  -5   2  665.88   25.22
   0  -5   2  648.41   24.34
   0   5  -2  655.97   24.73
   0   5  -2  650.97   24.53
   0  -5   1  249.53    9.22
   0  -5   1  237.95    8.73
   0   5  -1  241.29    8.83
   0   5  -1  237.66    8.83
   0  -5   1  225.10    8.93
   0  -5   1  228.63    8.73
   0   5  -1  235.70    9.03
   0   5  -1  224.71    8.83
   0  -5   0  714.75   25.12
   0  -5   0  766.26   26.98
   0   5   0  732.70   25.71
   0   5   0  703.86   24.73
   0  -5   0  713.77   27.08
   0  -5   0  738.59   27.77
   0   5   0  717.20   26.98
   0   5   0  718.77   27.18
   0  -5  -1  139.73    5.50
   0  -5  -1  147.68    5.99
   0   5   1  149.94    5.89
   0   5   1  142.48    5.59
   0  -5  -1  145.32    5.79
   0  -5  -1  143.07    6.28
   0   5   1  146.40    5.89
   0   5   1  146.50    6.28
   0  -5  -2  558.53   19.72
   0  -5  -2  563.14   20.02
   0   5   2  562.26   19.92
   0   5   2  583.06   20.61
   0  -5  -2  538.71   20.41
   0  -5  -2  556.47   21.39
   0   5   2  549.60   21.10
   0   5   2  532.04   20.21
   0  -5  -3  677.36   23.84
   0  -5  -3  698.46   24.83
   0   5   3  659.21   23.26
   0   5   3  663.43   23.35
   0  -5  -3  674.22   25.91
   0  -5  -3  660.78   25.02
   0   5   3  671.96   25.41
   0   5   3  679.62   26.00
   0  -5  -4   14.03    2.06
   0  -5  -4   11.48    2.94
   0   5   4   13.84    2.06
   0   5   4   19.43    2.65
   0  -5  -4   19.13    2.94
   0  -5  -4   17.66    1.67
   0   5   4   18.25    2.65
   0   5   4   21.69    1.86
   0  -5  -5   23.94    3.24
   0  -5  -5   27.97    2.36
   0   5   5   26.30    2.36
   0   5   5   28.65    3.24
   0  -5  -5   31.69    3.24
   0  -5  -5   32.77    2.16
   0   5   5   29.73    3.04
   0   5   5   29.05    2.16
   0  -5  -6    0.20    3.24
   0  -5  -6    1.08    2.06
   0   5   6    4.02    3.14
   0   5   6    1.37    1.96
   0  -5  -6    2.65    1.47
   0  -5  -6    1.96    2.94
   0   5   6    2.55    1.67
   0   5   6    1.77    2.65
   0  -5  -7   59.37    4.51
   0   5   7   59.37    3.24
   0  -5  -7   55.44    4.51
   0  -5  -7   50.83    2.94
   0  -5  -8  106.37    4.91
   0   5   8  105.49    5.89
   0   5   9  123.44    5.40
   0   5   9  110.98    5.99
   0  -5  -9  121.38    5.30
   0  -5  -9  120.40    6.97
   0   5   9  116.77    5.30
   0   5   9  128.25    6.67
   0  -5 -10   87.82    5.79
   0  -5 -10   73.89    4.02
   0   5  10   79.87    5.20
   0   5  10   78.01    4.02
   0  -5 -10   74.38    5.69
   0  -5 -10   81.93    4.02
   0   5  10   83.11    4.22
   0   5  10   84.88    5.40
   0  -5 -11    3.24    3.83
   0  -5 -11    2.36    2.36
   0   5  11    5.10    3.53
   0   5  11    5.10    2.16
   0  -5 -11    2.75    1.77
   0  -5 -11    7.26    4.12
   0   5  11    2.94    2.06
   0   5  11    4.22    3.34
   0  -5 -12  113.24    5.20
   0  -5 -12  131.59    6.87
   0   5  12  109.41    5.99
   0   5  12  121.38    5.30
   0  -5 -12  113.24    5.10
   0  -5 -12  115.00    7.07
   0   5  12  114.12    6.38
   0   5  12  104.80    5.00
   0  -5 -13   16.29    4.12
   0  -5 -13    9.62    2.36
   0   5  13    5.69    3.53
   0   5  13   10.01    2.26
   0  -5 -13   10.11    1.86
   0  -5 -13    4.32    4.32
   0   5  13    6.38    3.43
   0   5  13    8.93    2.06
   0   5  14  107.45    4.91
   0   5  14  102.15    5.79
   0  -5 -14  114.02    5.20
   0  -5 -14  102.64    6.97
   0   5  14  106.56    5.10
   0   5  14  107.84    6.28
   0  -5 -15   20.21    4.22
   0  -5 -15   28.85    2.94
   0   5  15   34.44    2.75
   0   5  15   35.03    4.12
   0  -5 -15   23.35    2.36
   0  -5 -15   31.50    5.10
   0   5  15   27.97    4.02
   0   5  15   31.69    2.85
   0  -5 -16   -1.37    4.02
   0   5  16   -2.45    2.16
   0  -5 -16   -3.83    4.71
   0  -5 -16    4.12    1.86
   0   5  16    1.37    2.16
   0   5  16    0.79    3.53
   0  -5 -17   11.58    4.42
   0  -5 -17   24.14    3.43
   0   5  17   22.08    2.55
   0   5  17   29.83    4.51
   0  -5 -17   19.92    4.81
   0  -5 -17   18.94    2.26
   0   5  17   21.59    2.65
   0   5  17   18.84    3.73
   0  -5 -18   11.68    3.73
   0  -5 -18    6.57    4.22
   0   5  18   11.28    4.32
   0   5  18   16.88    2.55
   0  -5 -18   14.03    4.71
   0  -5 -18   12.85    2.06
   0   5  18   12.85    2.26
   0   5  18    9.13    3.34
   0  -5 -19    7.56    4.22
   0  -5 -19   -2.26    4.22
   0   5  19    1.28    3.73
   0   5  19    7.46    2.55
   0  -5 -20    1.18    4.32
   0  -5 -20    2.06    3.93
   0   5  20    3.24    2.85
   0   5  20    1.08    3.73
   0  -5 -20    5.20    1.86
   0  -5 -20    3.14    3.63
   0   5  20    3.24    1.96
   0   5  20    5.20    2.85
   0  -5 -21   -3.34    3.14
   0  -5 -21    3.83    3.43
   0   5  21    5.99    3.14
   0   5  21    7.16    3.83
   0  -5 -21    1.28    2.16
   0  -5 -21    6.87    1.67
   0   5  21    5.20    2.26
   0   5  21    8.83    1.96
   0  -6  18    3.34    2.85
   0  -6  18    5.40    2.94
   0   6 -18    4.32    3.04
   0   6 -18    4.42    3.24
   0  -6  18    3.63    0.79
   0  -6  18    1.57    1.57
   0  -6  17    8.83    2.75
   0  -6  17   10.99    3.34
   0   6 -17    8.54    3.53
   0   6 -17    2.26    3.34
   0  -6  17    7.26    0.88
   0  -6  17    4.32    2.26
   0   6 -17    5.99    1.57
   0   6 -17    4.81    0.98
   0  -6  16    5.79    2.26
   0  -6  16    3.63    3.24
   0  -6  16    3.53    2.45
   0  -6  16    4.02    0.79
   0   6 -16    3.34    1.67
   0   6 -16    4.61    0.88
   0  -6  15   22.86    2.55
   0  -6  15   26.10    3.63
   0   6 -15   23.55    1.47
   0   6 -15   21.39    2.06
   0  -6  14   -0.98    2.94
   0   6 -14   -0.20    2.26
   0  -6  14    2.85    3.24
   0  -6  14    2.85    0.98
   0   6 -14    3.04    0.88
   0   6 -14    0.39    1.57
   0  -6  13    1.67    2.06
   0  -6  13    3.43    2.55
   0   6 -13   -0.39    2.06
   0   6 -13    0.49    3.14
   0  -6  13    4.81    3.34
   0  -6  13    0.88    0.98
   0   6 -13   -0.20    1.67
   0   6 -13    0.39    0.79
   0  -6  12    5.59    2.55
   0  -6  12    6.48    2.06
   0   6 -12    6.97    2.94
   0   6 -12    6.67    1.96
   0  -6  12    9.71    1.08
   0  -6  12    5.20    3.04
   0   6 -12    6.97    1.77
   0   6 -12    5.99    0.88
   0  -6  11   -0.49    1.86
   0  -6  11    0.49    2.36
   0   6 -11   -0.69    1.67
   0   6 -11   -0.20    2.65
   0  -6  11   -1.96    2.94
   0  -6  11    1.77    0.98
   0   6 -11   -0.29    1.57
   0   6 -11    0.49    0.79
   0  -6  10   44.55    3.34
   0  -6  10   42.39    2.75
   0   6 -10   48.38    3.63
   0   6 -10   46.81    2.75
   0  -6  10   43.86    3.24
   0  -6  10   43.47    2.16
   0   6 -10   44.06    1.96
   0   6 -10   43.96    2.26
   0  -6   9   92.53    4.22
   0  -6   9  103.62    5.00
   0   6  -9  101.17    4.91
   0   6  -9   96.06    4.22
   0  -6   9   97.14    4.71
   0  -6   9   94.20    3.93
   0   6  -9  101.85    4.22
   0   6  -9  100.48    4.02
   0  -6   8   46.22    2.75
   0  -6   8   43.37    3.14
   0   6  -8   43.37    2.55
   0   6  -8   47.20    3.24
   0  -6   8   43.76    2.65
   0  -6   8   46.02    2.26
   0   6  -8   47.20    2.16
   0   6  -8   49.16    2.16
   0  -6   7  220.49    8.34
   0  -6   7  222.25    8.73
   0   6  -7  243.06    9.42
   0   6  -7  228.53    8.54
   0  -6   7  206.75    8.14
   0  -6   7  225.69    8.83
   0   6  -7  213.13    8.14
   0   6  -7  233.64    8.93
   0  -6   6   77.81    4.22
   0  -6   6   78.11    3.63
   0   6  -6   77.91    4.02
   0   6  -6   81.35    3.73
   0  -6   6   81.05    3.63
   0   6  -6   86.84    3.53
   0   6  -6   89.88    3.63
   0   6  -5   32.38    2.36
   0   6  -5   27.77    2.94
   0  -6   5   31.89    1.86
   0  -6   5   30.03    1.96
   0   6  -5   27.77    1.47
   0   6  -5   30.22    1.57
   0  -6   4    4.32    0.88
   0  -6   4    3.14    1.67
   0   6  -4    2.94    0.98
   0   6  -4    1.86    0.98
   0  -6   3   31.20    2.36
   0  -6   3   30.81    2.45
   0   6  -3   29.24    2.06
   0   6  -3   33.17    2.55
   0  -6   3   33.17    2.45
   0  -6   3   27.38    1.47
   0   6  -3   26.89    1.67
   0   6  -3   28.26    1.67
   0  -6   2  423.02   15.21
   0  -6   2  438.03   15.80
   0   6  -2  442.74   15.90
   0   6  -2  429.01   15.31
   0  -6   2  430.28   16.29
   0  -6   2  428.51   16.49
   0   6  -2  420.96   15.99
   0   6  -2  430.58   16.39
   0  -6   1  140.12    5.59
   0  -6   1  134.43    5.50
   0   6  -1  138.06    5.59
   0   6  -1  144.54    5.69
   0   6  -1  137.57    5.69
   0   6  -1  134.63    5.40
   0  -6   0   15.21    2.06
   0  -6   0   17.47    2.16
   0   6   0   16.68    1.96
   0   6   0   16.39    1.96
   0  -6   0   18.45    2.36
   0  -6   0   15.99    1.28
   0   6   0   17.66    1.47
   0   6   0   17.86    1.86
   0  -6  -1  162.01    6.48
   0  -6  -1  152.09    6.67
   0   6   1  154.06    6.18
   0   6   1  165.54    6.97
   0  -6  -2  103.92    4.81
   0  -6  -2  100.78    4.32
   0  -6  -2  106.47    4.51
   0  -6  -2  103.62    5.20
   0   6   2  103.42    4.91
   0   6   2  107.06    4.51
   0  -6  -3  937.79   32.87
   0  -6  -3  954.86   33.66
   0   6   3  932.49   32.77
   0   6   3  914.73   32.09
   0  -6  -3  933.76   35.13
   0  -6  -3  977.13   37.19
   0   6   3  944.26   35.82
   0   6   3  915.41   34.54
   0  -6  -4   73.01    3.73
   0  -6  -4   77.52    4.61
   0   6   4   78.79    4.12
   0   6   4   78.21    3.83
   0  -6  -4   79.19    3.63
   0  -6  -4   72.91    4.42
   0   6   4   81.74    3.73
   0   6   4   80.66    4.42
   0  -6  -5  256.99    9.62
   0  -6  -5  252.67   10.01
   0   6   5  258.86    9.91
   0   6   5  269.94   10.11
   0  -6  -5  275.34   10.79
   0  -6  -5  279.95   11.68
   0   6   5  272.00   10.70
   0   6   5  268.67   11.09
   0  -6  -7  260.52    9.91
   0   6   7  257.68   10.50
   0  -6  -7  256.50   10.21
   0  -6  -8   -0.79    2.75
   0  -6  -8    2.75    4.02
   0   6   8    1.47    3.83
   0   6   8   -1.28    2.45
   0  -6  -8    1.77    3.83
   0  -6  -8   -1.37    1.77
   0   6   8   -0.39    3.14
   0   6   8    3.24    1.96
   0  -6  -9   75.56    5.50
   0  -6  -9   63.68    3.73
   0   6   9   65.06    4.71
   0   6   9   66.53    3.73
   0  -6  -9   73.10    3.73
   0  -6  -9   71.63    5.69
   0   6   9   68.98    4.91
   0   6   9   70.26    3.83
   0  -6 -10  101.95    6.18
   0  -6 -10   96.36    4.71
   0   6  10  101.85    4.81
   0   6  10   86.64    5.20
   0  -6 -10   94.40    4.42
   0  -6 -10   96.75    6.38
   0   6  10   96.26    4.61
   0   6  10  101.46    5.89
   0  -6 -11   47.79    3.34
   0  -6 -11   46.12    4.81
   0   6  11   44.45    3.04
   0   6  11   48.28    4.32
   0  -6 -11   50.34    5.20
   0  -6 -11   44.25    2.85
   0   6  11   50.73    4.32
   0   6  11   48.77    3.14
   0  -6 -12   31.11    2.94
   0  -6 -12   40.23    4.71
   0   6  12   31.30    4.02
   0   6  12   31.30    2.75
   0  -6 -12   24.43    4.61
   0  -6 -12   34.25    2.55
   0   6  12   34.83    4.02
   0   6  12   35.23    2.85
   0  -6 -13   18.25    2.65
   0  -6 -13   20.51    4.42
   0   6  13   21.98    2.55
   0   6  13   20.51    3.83
   0  -6 -13   24.92    4.91
   0  -6 -13   21.39    2.16
   0   6  13   23.35    3.73
   0   6  13   21.00    2.45
   0  -6 -14    8.54    4.32
   0  -6 -14    2.94    2.55
   0   6  14    0.49    3.63
   0   6  14    7.36    2.26
   0  -6 -14   -0.88    4.32
   0  -6 -14    7.16    1.86
   0   6  14    3.14    3.34
   0   6  14    5.00    2.06
   0   6  15   32.58    3.04
   0   6  15   39.64    4.51
   0  -6 -15   33.26    5.20
   0  -6 -15   36.60    2.75
   0   6  15   38.27    4.22
   0   6  15   31.20    2.85
   0  -6 -16   24.24    5.20
   0  -6 -16   24.53    2.45
   0   6  16   23.75    2.75
   0  -6 -17   34.05    2.65
   0  -6 -17   27.67    5.20
   0   6  17   35.72    4.12
   0   6  17   29.93    2.94
   0  -6 -18   17.17    4.32
   0  -6 -18    2.85    4.22
   0   6  18   16.88    4.42
   0   6  18   20.70    2.94
   0  -6 -19   -1.37    4.12
   0  -6 -19    3.14    4.71
   0   6  19    6.97    2.65
   0   6  19    2.55    4.02
   0  -6 -19   10.30    3.93
   0  -6 -19    9.62    1.96
   0   6  19    4.42    3.14
   0   6  19    6.18    2.06
   0  -6 -20    7.16    4.61
   0  -6 -20    1.67    4.22
   0   6  20    4.12    3.24
   0   6  20    0.10    4.12
   0  -6 -20    8.73    3.24
   0  -6 -20    7.36    1.77
   0   6  20    5.59    2.75
   0   6  20    9.32    2.06
   0  -6 -21   -3.63    3.53
   0  -6 -21   -0.10    3.34
   0   6  21   -1.57    4.12
   0   6  21    0.69    3.14
   0  -6 -21    0.00    2.06
   0  -6 -21    1.67    1.57
   0   6  21   -0.59    2.26
   0   6  21    0.88    1.86
   0  -7  18   11.38    3.14
   0   7 -18   -8.54    3.14
   0   7 -18    1.96    3.14
   0  -7  17    0.10    3.14
   0  -7  17    0.10    2.94
   0   7 -17   -4.22    3.04
   0   7 -17    1.47    3.34
   0  -7  17    0.49    0.69
   0  -7  17    1.28    1.57
   0  -7  16    2.75    3.04
   0  -7  16    4.22    2.55
   0   7 -16    3.73    2.94
   0   7 -16   -0.79    3.63
   0  -7  16    3.43    0.88
   0  -7  16    2.94    2.16
   0   7 -16    2.85    1.57
   0   7 -16    1.96    0.79
   0  -7  15   -4.22    3.24
   0  -7  15    0.10    2.06
   0   7 -15    1.18    2.65
   0  -7  15   -0.88    2.06
   0  -7  15    1.67    0.88
   0   7 -15    2.65    1.57
   0   7 -15    1.57    0.79
   0  -7  14   13.74    2.26
   0  -7  14   14.92    3.24
   0   7 -14   12.66    2.55
   0   7 -14   15.60    3.63
   0   7 -14   16.19    1.18
   0   7 -14   12.46    1.77
   0  -7  13   -1.96    2.94
   0  -7  13    2.26    1.08
   0   7 -13   -0.49    0.79
   0   7 -13   -0.10    1.67
   0  -7  12    8.24    2.85
   0  -7  12   13.93    2.06
   0   7 -12   11.38    2.06
   0   7 -12   12.95    3.14
   0  -7  12   11.48    3.14
   0  -7  12    7.46    1.18
   0  -7  11   23.75    2.94
   0  -7  11   17.47    2.16
   0   7 -11   21.10    2.06
   0   7 -11   22.96    3.04
   0  -7  11   19.92    1.57
   0  -7  11   25.91    3.04
   0   7 -11   21.39    1.28
   0   7 -11   19.04    1.77
   0  -7  10   59.46    3.73
   0  -7  10   61.03    3.24
   0   7 -10   64.08    3.24
   0   7 -10   71.73    4.22
   0  -7  10   64.96    3.83
   0  -7  10   62.70    2.94
   0   7 -10   67.22    2.85
   0   7 -10   68.79    3.04
   0  -7   9    3.73    2.16
   0  -7   9    4.42    1.67
   0   7  -9    5.40    1.47
   0   7  -9    2.85    2.26
   0  -7   9    5.10    1.28
   0  -7   9    4.71    1.96
   0   7  -9    4.71    0.88
   0   7  -9    3.04    0.98
   0  -7   8    1.77    1.96
   0  -7   8    0.29    1.57
   0   7  -8    1.86    1.37
   0   7  -8    1.08    2.16
   0  -7   8    3.43    1.28
   0  -7   8    2.26    1.37
   0   7  -8    3.73    0.88
   0   7  -8    2.85    0.79
   0  -7   7    5.20    2.45
   0  -7   7    1.18    1.67
   0   7  -7   -0.10    2.06
   0   7  -7    1.57    1.67
   0  -7   7    1.77    1.37
   0  -7   7    4.51    1.37
   0   7  -7    3.04    0.88
   0   7  -7    2.45    0.88
   0  -7   6   17.07    2.75
   0  -7   6   14.23    1.96
   0   7  -6   13.84    2.16
   0   7  -6   17.17    2.06
   0  -7   6   17.07    1.67
   0  -7   6   15.90    1.37
   0   7  -6   15.11    1.18
   0   7  -6   17.27    1.28
   0  -7   5   10.99    2.55
   0  -7   5   10.11    1.96
   0   7  -5    9.71    2.16
   0   7  -5   14.03    1.86
   0  -7   5   10.40    1.86
   0  -7   5   13.54    1.28
   0   7  -5    9.52    1.18
   0   7  -5   12.27    1.18
   0  -7   4   94.40    4.61
   0  -7   4   90.28    4.12
   0   7  -4   90.77    4.32
   0   7  -4   92.43    4.12
   0  -7   4   89.49    3.73
   0  -7   4   90.96    4.42
   0   7  -4   91.75    3.83
   0   7  -4   95.38    4.02
   0  -7   3  168.29    6.87
   0  -7   3  160.73    6.48
   0   7  -3  167.60    6.57
   0   7  -3  166.42    6.77
   0  -7   3  173.88    6.77
   0  -7   3  176.23    7.46
   0   7  -3  173.58    6.87
   0   7  -3  166.13    6.57
   0  -7   2   82.82    4.32
   0  -7   2   90.37    3.73
   0   7  -2   86.55    3.73
   0   7  -2   92.53    4.12
   0   7  -1    4.61    2.26
   0  -7   1    7.95    1.18
   0  -7   1    7.36    2.45
   0   7  -1    6.67    1.67
   0   7  -1    5.89    1.37
   0  -7   0   54.66    3.24
   0   7   0   44.45    2.85
   0  -7   0   54.36    2.55
   0  -7   0   54.07    3.53
   0   7   0   55.24    2.75
   0   7   0   48.77    2.85
   0  -7  -1   24.53    2.85
   0  -7  -1   22.86    2.55
   0   7   1   27.77    2.65
   0   7   1   21.20    2.55
   0  -7  -1   22.57    1.67
   0  -7  -1   27.57    3.04
   0   7   1   25.51    2.55
   0   7   1   24.43    1.86
   0  -7  -2   27.18    2.55
   0  -7  -2   30.22    3.24
   0   7   2   32.77    2.94
   0  -7  -2   32.77    3.34
   0  -7  -2   35.33    2.16
   0   7   2   32.09    2.94
   0   7   2   29.93    2.06
   0  -7  -3   34.25    3.43
   0   7   3   33.85    2.85
   0  -7  -3   34.44    2.16
   0  -7  -3   37.48    3.63
   0   7   3   35.13    3.14
   0   7   3   34.93    2.36
   0  -7  -4   21.49    3.53
   0   7   4   21.78    2.06
   0  -7  -5    4.91    2.75
   0   7   5    7.16    3.34
   0   7   5    5.79    2.94
   0  -7  -6   47.10    4.71
   0  -7  -6   45.04    3.43
   0   7   6   46.02    3.34
   0   7   6   41.90    3.73
   0  -7  -6   40.04    2.55
   0  -7  -6   47.00    4.42
   0   7   6   41.11    3.63
   0   7   6   43.27    2.75
   0  -7  -7   84.00    4.42
   0  -7  -7   82.62    5.69
   0   7   7   81.54    4.32
   0   7   7   83.41    5.10
   0  -7  -7   82.43    3.93
   0  -7  -7   89.20    5.69
   0   7   7   83.01    4.91
   0   7   7   85.76    4.22
   0  -7  -8    0.69    2.75
   0  -7  -8    3.14    4.02
   0   7   8    0.79    2.45
   0   7   8   -0.59    3.73
   0  -7  -8    6.67    3.93
   0  -7  -8   -1.18    1.67
   0   7   8    0.20    1.96
   0   7   8    1.18    3.04
   0  -7  -9    5.79    2.75
   0  -7  -9    2.85    4.12
   0   7   9    5.40    2.36
   0   7   9   -0.10    3.83
   0  -7  -9    7.07    4.02
   0  -7  -9    4.91    1.77
   0  -7 -10   16.19    2.75
   0  -7 -10   12.27    4.02
   0   7  10   13.93    2.45
   0   7  10   13.93    3.93
   0  -7 -10    9.32    4.22
   0  -7 -10   15.31    1.96
   0   7  10   15.31    3.34
   0   7  10   13.64    2.16
   0  -7 -11   26.79    2.94
   0  -7 -11   23.84    4.42
   0   7  11   26.98    2.75
   0   7  11   24.73    3.93
   0  -7 -11   30.81    4.51
   0  -7 -11   25.22    2.26
   0   7  11   28.36    3.63
   0   7  11   27.38    2.55
   0  -7 -12   38.56    3.24
   0  -7 -12   33.66    4.91
   0   7  12   37.19    3.04
   0   7  12   42.39    4.32
   0  -7 -12   38.56    5.20
   0  -7 -12   38.76    2.65
   0   7  12   40.13    4.12
   0   7  12   42.78    3.04
   0  -7 -13   -3.53    2.45
   0  -7 -13   -0.69    4.32
   0   7  13   -1.18    2.26
   0   7  13   -1.86    3.43
   0  -7 -13   -0.98    4.42
   0  -7 -13    0.98    1.67
   0   7  13   -0.49    3.04
   0   7  13   -0.49    2.06
   0  -7 -14    6.77    2.75
   0  -7 -14    5.50    4.61
   0   7  14    9.62    3.73
   0   7  14    6.67    2.45
   0  -7 -14    5.59    4.51
   0  -7 -14    5.50    1.77
   0   7  14    6.77    3.14
   0   7  14    5.89    2.16
   0  -7 -15    4.22    4.81
   0   7  15   11.58    2.75
   0  -7 -15   10.70    5.50
   0  -7 -15    5.59    1.96
   0   7  15   12.56    3.43
   0   7  15   10.21    2.36
   0  -7 -16    8.14    5.00
   0  -7 -16   17.47    3.63
   0   7  16   20.02    2.94
   0   7  16   18.55    4.32
   0  -7 -16   17.66    4.91
   0  -7 -16   13.54    2.16
   0   7  16   11.68    3.43
   0   7  16   12.07    2.45
   0  -7 -17    3.93    3.63
   0  -7 -17   -2.06    4.02
   0   7  17    4.42    2.45
   0   7  17   -1.47    4.32
   0  -7 -17    0.10    1.77
   0  -7 -18   -3.73    4.51
   0  -7 -18   -1.18    4.02
   0   7  18    0.98    2.55
   0   7  18    1.18    4.32
   0  -7 -18    3.04    3.93
   0  -7 -18    1.86    1.77
   0   7  18    1.86    3.24
   0   7  18    2.55    2.16
   0   7  19   10.89    2.85
   0   7  19   14.42    4.42
   0  -7 -19   13.25    3.83
   0  -7 -19   15.50    1.96
   0   7  19    9.81    3.24
   0   7  19   12.95    2.26
   0  -7 -20    4.02    4.32
   0  -7 -20   -7.16    4.02
   0   7  20   -4.42    3.24
   0   7  20    2.94    4.32
   0  -7 -20   -2.16    2.36
   0  -7 -20   -0.98    1.57
   0   7  20   -0.29    2.36
   0   7  20    0.98    1.86
   0  -7 -21   -0.69    3.73
   0  -7 -21   -1.18    3.43
   0   7  21    5.40    4.22
   0   7  21    7.16    3.34
   0  -7 -21    5.59    2.16
   0  -7 -21   11.78    1.77
   0   7  21   10.89    2.16
   0   7  21    9.81    2.45
   0  -8  17    0.49    2.55
   0  -8  17    1.67    2.65
   0   8 -17    1.18    2.85
   0   8 -17    0.59    2.94
   0  -8  16   -2.16    3.14
   0  -8  16    6.28    2.75
   0   8 -16   -2.16    3.14
   0   8 -16    0.39    2.94
   0  -8  16   -0.39    1.67
   0  -8  16   -0.79    0.88
   0  -8  15   15.70    3.63
   0  -8  15   16.68    2.65
   0   8 -15   27.38    3.83
   0   8 -15   19.53    1.77
   0   8 -15   18.15    1.18
   0  -8  14   17.86    2.36
   0  -8  14   16.29    3.63
   0   8 -14   15.11    3.43
   0   8 -14   13.44    2.85
   0   8 -14   16.88    1.18
   0   8 -14   18.15    1.86
   0  -8  13   10.50    3.14
   0  -8  13   19.63    2.26
   0   8 -13   15.21    2.55
   0   8 -13   23.75    3.43
   0  -8  13   19.82    1.67
   0  -8  13   14.33    3.04
   0   8 -12   24.53    2.94
   0  -8  12   24.83    1.86
   0  -8  12   25.41    3.24
   0  -8  11   71.63    4.42
   0  -8  11   67.02    3.63
   0   8 -11   82.13    4.12
   0   8 -11   73.50    4.42
   0  -8  11   69.67    4.12
   0  -8  11   73.20    3.43
   0   8 -11   75.85    3.24
   0   8 -11   77.81    3.43
   0  -8  10   15.60    2.65
   0  -8  10    8.05    1.96
   0   8 -10    9.22    2.65
   0   8 -10    6.48    1.77
   0  -8  10    9.13    1.47
   0  -8  10   11.28    2.36
   0   8 -10    7.75    1.18
   0   8 -10   10.30    1.08
   0  -8   9   -2.65    2.16
   0  -8   9   -2.55    1.67
   0   8  -9    1.96    1.47
   0   8  -9    2.75    2.26
   0  -8   9    0.39    1.37
   0  -8   9    1.67    1.67
   0   8  -9    0.69    0.88
   0   8  -9   -0.29    0.88
   0  -8   8    4.12    2.26
   0  -8   8    3.83    1.67
   0   8  -8    3.53    2.06
   0   8  -8    4.91    1.47
   0  -8   8    2.45    1.47
   0  -8   8    3.73    1.57
   0   8  -8    1.96    0.88
   0   8  -8    2.85    0.88
   0  -8   7  167.89    7.16
   0  -8   7  173.68    6.97
   0   8  -7  162.40    6.77
   0   8  -7  172.60    6.87
   0  -8   7  154.94    6.18
   0  -8   7  165.64    6.97
   0   8  -7  180.55    7.07
   0   8  -7  185.95    7.26
   0  -8   6    3.14    2.45
   0  -8   6    1.28    1.86
   0   8  -6   -2.55    1.77
   0   8  -6    1.28    2.06
   0  -8   6   -0.29    1.18
   0  -8   6    1.37    1.86
   0   8  -6    0.79    1.08
   0   8  -6   -0.39    0.98
   0  -8   5  429.69   15.90
   0  -8   5  422.92   15.31
   0   8  -5  423.90   15.50
   0   8  -5  414.48   15.01
   0  -8   5  460.90   17.47
   0  -8   5  450.59   17.47
   0   8  -5  426.55   16.29
   0   8  -5  439.60   16.68
   0  -8   4  122.76    5.50
   0  -8   4  118.83    5.10
   0   8  -4  124.42    5.40
   0   8  -4  123.15    5.20
   0  -8   4  126.78    5.10
   0  -8   4  116.97    5.40
   0   8  -4  126.58    5.20
   0   8  -4  118.44    4.91
   0  -8   3    3.73    2.06
   0  -8   3    6.08    2.06
   0   8  -3    5.00    1.86
   0   8  -3    5.30    2.16
   0  -8   3    4.42    2.16
   0  -8   3    5.20    0.98
   0   8  -3    7.16    1.37
   0   8  -3    3.24    1.28
   0  -8   2   20.61    2.45
   0  -8   2   23.75    2.45
   0   8  -2   19.43    2.55
   0   8  -2   26.79    2.36
   0  -8   2   28.75    1.67
   0  -8   2   25.81    2.75
   0   8  -2   25.32    1.86
   0   8  -2   27.67    2.06
   0  -8   1  567.17   20.41
   0  -8   1  562.16   20.12
   0   8  -1  556.67   19.92
   0   8  -1  539.49   19.33
   0  -8   1  549.11   21.29
   0  -8   1  569.13   21.59
   0   8  -1  540.18   20.51
   0   8  -1  561.47   21.49
   0  -8   0  251.20    9.71
   0  -8   0  217.64    8.54
   0   8   0  214.21    8.34
   0   8   0  237.17    9.03
   0  -8   0  229.32    9.71
   0  -8   0  216.47    8.44
   0   8   0  218.04    8.83
   0   8   0  229.12    9.03
   0  -8  -1   16.19    2.65
   0  -8  -1   18.06    3.14
   0   8   1   16.39    2.45
   0   8   1   12.27    2.85
   0  -8  -1   16.39    3.14
   0  -8  -1   16.49    1.57
   0   8   1   15.80    2.36
   0   8   1   17.07    1.86
   0  -8  -2  433.42   15.80
   0  -8  -2  418.60   15.41
   0   8   2  431.95   15.80
   0   8   2  435.09   15.80
   0  -8  -2  426.85   17.07
   0   8   2  414.38   15.99
   0  -8  -3    0.69    2.26
   0  -8  -3   -1.28    3.43
   0   8   3    2.45    2.45
   0   8   3   -1.67    2.55
   0  -8  -4  129.53    5.79
   0  -8  -4  124.23    6.38
   0   8   4  129.92    5.79
   0   8   4  124.62    5.79
   0  -8  -4  119.62    6.48
   0  -8  -4  125.80    5.40
   0   8   4  125.11    6.08
   0   8   4  133.35    5.69
   0  -8  -5    3.04    2.65
   0  -8  -5    3.43    4.12
   0   8   5    3.04    2.94
   0   8   5    3.93    2.85
   0  -8  -5    3.43    3.53
   0  -8  -5    4.12    1.57
   0   8   5    6.08    2.75
   0   8   5    5.30    1.86
   0  -8  -6    5.20    2.85
   0  -8  -6    4.71    3.93
   0   8   6    7.16    3.24
   0   8   6    7.65    2.65
   0  -8  -6   -1.37    3.53
   0  -8  -6    7.07    1.67
   0   8   6    4.71    1.77
   0   8   6    4.91    2.85
   0  -8  -7   47.20    3.53
   0  -8  -7   44.65    4.81
   0   8   7   44.84    4.02
   0   8   7   44.25    3.43
   0  -8  -7   44.94    2.75
   0  -8  -7   44.65    4.61
   0   8   7   47.00    3.93
   0   8   7   47.00    2.94
   0  -8  -8   37.19    3.24
   0  -8  -8   35.62    4.91
   0   8   8   41.90    3.34
   0   8   8   38.66    4.02
   0  -8  -8   50.04    4.81
   0  -8  -8   43.18    2.75
   0   8   8   42.78    2.85
   0   8   8   41.90    3.83
   0  -8  -9    3.43    2.65
   0  -8  -9   -0.39    4.02
   0   8   9    0.29    3.63
   0   8   9    1.08    2.45
   0  -8  -9    2.06    1.67
   0  -8  -9    3.14    3.93
   0   8   9    3.73    1.86
   0   8   9   -0.88    2.85
   0  -8 -10   32.19    3.24
   0  -8 -10   31.89    4.61
   0   8  10   34.34    4.42
   0   8  10   35.23    3.04
   0  -8 -10   30.32    4.61
   0  -8 -10   32.68    2.45
   0   8  10   32.09    3.53
   0   8  10   37.39    2.75
   0  -8 -11   20.41    3.04
   0  -8 -11   23.55    4.51
   0   8  11   24.24    2.75
   0   8  11   23.16    4.22
   0  -8 -11   22.47    2.16
   0  -8 -11   21.39    4.71
   0   8  11   21.29    3.34
   0   8  11   20.41    2.36
   0  -8 -12    2.85    2.75
   0  -8 -12   -3.73    4.12
   0   8  12    0.59    2.36
   0   8  12   -1.28    3.83
   0  -8 -12    1.08    4.22
   0  -8 -12   -0.29    1.67
   0   8  12    2.45    2.06
   0   8  12   -0.20    2.94
   0  -8 -13    0.20    2.65
   0  -8 -13   -1.18    4.61
   0   8  13    0.29    2.45
   0   8  13   -3.34    3.43
   0  -8 -13   -3.14    1.67
   0  -8 -13    3.53    4.42
   0   8  13    1.57    2.06
   0   8  13    1.47    2.94
   0  -8 -14   -0.79    2.94
   0  -8 -14   -3.34    4.81
   0   8  14   -2.26    3.93
   0   8  14    1.96    2.65
   0  -8 -14    0.88    4.61
   0  -8 -14    3.43    1.77
   0   8  14   -5.20    3.14
   0   8  14    0.49    2.16
   0  -8 -15    1.86    3.34
   0   8  15    6.28    4.32
   0  -8 -15    2.06    2.06
   0  -8 -15    5.79    4.91
   0   8  15    3.24    2.16
   0   8  15   -5.30    3.24
   0  -8 -16    8.73    4.71
   0  -8 -16    7.07    3.63
   0   8  16    7.36    2.85
   0   8  16   10.40    4.42
   0   8  16    8.83    3.24
   0  -8 -17    9.71    4.22
   0  -8 -17    8.14    4.51
   0   8  17    5.99    4.51
   0   8  17   13.74    3.04
   0  -8 -17    7.07    1.77
   0  -8 -17   10.70    3.73
   0   8  17    3.83    3.14
   0   8  17    8.54    2.06
   0   8  18   15.50    4.61
   0   8  18   10.99    2.94
   0   8  18   18.35    3.34
   0   8  18   10.99    2.26
   0  -8 -19    3.53    4.32
   0  -8 -19    5.10    4.02
   0   8  19    0.20    2.94
   0   8  19   -5.10    4.22
   0  -8 -19    1.77    3.63
   0  -8 -19   -1.57    1.57
   0   8  19   -2.06    2.94
   0   8  19    0.00    1.96
   0  -8 -20   -0.69    3.73
   0  -8 -20   -4.02    3.93
   0   8  20   -4.71    4.22
   0   8  20   -2.75    3.34
   0  -8 -20   -2.36    2.06
   0  -8 -20    1.47    1.57
   0   8  20    1.37    2.36
   0   8  20    1.18    1.86
   0  -9  16    4.61    2.65
   0  -9  16    4.42    2.65
   0   9 -16    8.64    2.94
   0   9 -16    1.28    3.34
   0  -9  15    8.05    3.53
   0  -9  15   11.38    2.75
   0   9 -15    3.83    2.94
   0   9 -15    7.75    3.34
   0  -9  15   10.30    1.18
   0  -9  15    7.26    1.77
   0   9 -15    5.40    1.37
   0   9 -15    5.00    0.88
   0  -9  14    8.54    3.34
   0  -9  14    3.93    2.16
   0   9 -14    4.42    3.34
   0  -9  14    1.96    1.96
   0  -9  14    5.20    1.18
   0   9 -14    6.08    0.88
   0   9 -14    1.96    1.77
   0  -9  13   22.67    2.45
   0  -9  13   21.49    3.73
   0   9 -13   18.45    2.94
   0   9 -13   15.90    3.24
   0  -9  13   23.94    1.77
   0  -9  13   20.12    2.85
   0  -9  12   47.98    4.02
   0  -9  12   45.92    2.94
   0   9 -12   54.75    3.53
   0   9 -12   46.41    3.63
   0  -9  12   40.92    2.55
   0  -9  12   41.90    3.43
   0   9 -12   46.71    2.36
   0   9 -12   44.55    2.45
   0  -9  11   33.85    3.53
   0   9 -11   43.27    3.14
   0  -9  11   34.83    2.55
   0  -9  11   42.78    3.24
   0   9 -11   40.82    2.26
   0   9 -11   40.13    2.26
   0  -9  10   62.21    4.12
   0  -9  10   60.05    3.43
   0   9 -10   60.25    3.83
   0   9 -10   66.23    3.63
   0  -9  10   62.70    3.53
   0  -9  10   60.45    3.43
   0   9 -10   57.70    2.65
   0   9 -10   60.45    2.85
   0  -9   9   18.15    2.75
   0  -9   9   20.90    2.36
   0   9  -9   18.35    2.06
   0   9  -9   19.13    2.65
   0  -9   9   22.86    2.55
   0  -9   9   20.41    1.86
   0   9  -9   21.69    1.67
   0   9  -9   20.90    1.37
   0  -9   8   49.06    3.04
   0  -9   8   48.87    3.73
   0   9  -8   53.87    3.14
   0   9  -8   51.52    3.43
   0   9  -8   48.47    2.26
   0   9  -8   45.92    2.45
   0  -9   7  442.15   16.09
   0  -9   7  441.76   16.49
   0   9  -7  433.52   15.90
   0   9  -7  444.12   16.09
   0  -9   7  435.38   16.58
   0  -9   7  463.25   18.06
   0   9  -7  456.09   17.37
   0   9  -7  455.30   17.27
   0  -9   6   20.12    2.85
   0  -9   6   19.04    2.16
   0   9  -6   19.92    2.16
   0   9  -6   18.25    2.36
   0  -9   6   19.43    2.55
   0  -9   6   22.18    1.57
   0   9  -6   16.58    1.57
   0   9  -6   18.35    1.37
   0  -9   5   16.58    2.75
   0  -9   5   14.92    2.16
   0   9  -5   14.72    1.96
   0   9  -5   12.66    2.16
   0  -9   5   15.41    1.28
   0  -9   5   18.64    2.45
   0   9  -5   13.84    1.47
   0   9  -5   18.64    1.47
   0  -9   4   17.47    2.55
   0  -9   4   18.35    2.26
   0   9  -4   15.11    2.06
   0   9  -4   20.02    2.36
   0  -9   4   18.64    1.37
   0  -9   4   19.13    2.55
   0   9  -4   18.64    1.67
   0   9  -4   20.12    1.57
   0  -9   3  251.20    9.81
   0  -9   3  247.67    9.42
   0   9  -3  264.74   10.11
   0   9  -3  252.48    9.62
   0  -9   3  253.95   10.50
   0  -9   3  261.41   10.11
   0   9  -3  246.49    9.71
   0   9  -3  248.85    9.71
   0  -9   2   78.60    3.93
   0  -9   2   73.79    4.02
   0   9  -2   74.77    3.83
   0   9  -2   73.89    3.93
   0  -9   2   80.07    3.43
   0  -9   2   70.55    4.22
   0   9  -2   75.07    3.53
   0   9  -2   78.79    3.83
   0  -9   1  752.82   26.69
   0  -9   1  797.37   28.46
   0   9  -1  731.62   26.00
   0   9  -1  814.15   28.85
   0  -9   1  788.34   29.73
   0  -9   1  794.52   30.52
   0   9  -1  780.29   29.73
   0   9  -1  792.76   30.03
   0  -9   0   82.62    4.42
   0  -9   0   74.58    4.12
   0   9   0   72.91    3.93
   0   9   0   73.10    3.83
   0  -9  -1  421.16   15.50
   0  -9  -1  411.64   15.21
   0   9   1  418.70   15.31
   0   9   1  411.34   15.11
   0   9   1  418.51   16.39
   0  -9  -2   12.17    2.55
   0  -9  -2   12.76    3.14
   0   9   2   10.70    2.55
   0   9   2    9.22    2.65
   0  -9  -2    9.81    1.47
   0  -9  -2    5.69    3.34
   0   9   2   13.64    2.55
   0   9   2   10.30    1.77
   0  -9  -3   82.03    4.22
   0  -9  -3   75.95    4.91
   0   9   3   87.33    4.71
   0   9   3   77.42    4.22
   0  -9  -3   76.05    3.63
   0  -9  -3   75.75    5.10
   0   9   3   77.81    4.51
   0   9   3   81.93    3.93
   0  -9  -4   11.38    3.73
   0  -9  -4    7.26    2.26
   0   9   4   10.01    2.85
   0   9   4    7.95    2.55
   0  -9  -4    8.54    3.43
   0  -9  -4   11.48    1.67
   0   9   4   12.07    2.75
   0   9   4    9.81    1.86
   0  -9  -5   47.10    4.81
   0  -9  -5   32.58    3.24
   0   9   5   42.10    3.53
   0   9   5   40.53    3.43
   0  -9  -5   32.58    2.36
   0  -9  -5   38.56    4.12
   0   9   5   35.72    2.55
   0   9   5   36.60    3.53
   0  -9  -6   78.30    5.69
   0  -9  -6   68.59    4.12
   0   9   6   67.22    4.12
   0   9   6   67.71    4.32
   0  -9  -6   70.06    5.00
   0  -9  -6   66.73    3.43
   0   9   6   68.30    4.51
   0   9   6   70.55    3.63
   0  -9  -7  114.61    5.50
   0  -9  -7  109.61    6.38
   0   9   7  103.52    5.10
   0   9   7  103.62    5.50
   0  -9  -7  112.06    6.48
   0  -9  -7  113.14    5.10
   0   9   7  112.45    5.10
   0   9   7  115.59    6.08
   0  -9  -8  142.87    7.56
   0  -9  -8  152.88    6.77
   0   9   8  146.89    6.48
   0   9   8  154.74    7.16
   0  -9  -8  154.55    6.57
   0  -9  -8  153.66    8.05
   0   9   8  148.95    6.48
   0   9   8  140.61    6.97
   0  -9  -9   12.66    4.51
   0  -9  -9   14.33    2.85
   0   9   9   20.70    3.53
   0   9   9   15.21    2.85
   0  -9  -9   16.98    1.96
   0  -9  -9   20.51    4.22
   0   9   9   17.27    3.14
   0   9   9   18.15    2.16
   0  -9 -10  137.67    7.56
   0  -9 -10  144.24    6.38
   0   9  10  138.46    6.87
   0   9  10  143.36    6.38
   0  -9 -10  138.46    8.14
   0  -9 -10  142.28    6.08
   0   9  10  138.65    6.18
   0   9  10  150.43    7.36
   0  -9 -11    1.86    4.32
   0  -9 -11   -2.16    2.85
   0   9  11    0.49    2.45
   0   9  11   -1.86    3.83
   0  -9 -11    0.20    1.67
   0  -9 -11    0.88    4.22
   0   9  11    1.08    1.96
   0   9  11    1.18    2.94
   0  -9 -12    0.69    2.85
   0  -9 -12    0.20    4.42
   0   9  12   -1.67    3.93
   0   9  12    0.69    2.45
   0  -9 -12    0.59    1.67
   0  -9 -12   -9.91    4.22
   0   9  12    1.77    2.94
   0   9  12   -1.08    1.96
   0  -9 -13    1.67    4.71
   0  -9 -13    6.18    3.24
   0   9  13    7.07    4.42
   0   9  13    2.16    2.65
   0  -9 -13    4.02    4.71
   0  -9 -13    1.57    1.77
   0   9  13    6.77    2.26
   0   9  13   -2.65    3.04
   0  -9 -14   -2.26    5.00
   0  -9 -15   16.98    5.10
   0  -9 -15   24.92    4.12
   0   9  15   20.31    5.10
   0   9  15   13.54    3.04
   0  -9 -15   19.82    2.26
   0  -9 -15   13.44    5.10
   0   9  15   19.43    2.55
   0   9  15   21.88    3.53
   0  -9 -16   -5.10    4.61
   0  -9 -16    0.10    3.73
   0   9  16    0.00    2.94
   0   9  16   -0.59    4.42
   0  -9 -16    1.47    1.77
   0  -9 -16   -1.28    3.73
   0   9  16    1.08    3.04
   0   9  16   -0.59    1.96
   0  -9 -17    7.95    5.00
   0  -9 -17    0.59    4.32
   0   9  17    2.26    3.14
   0   9  17    3.83    4.51
   0  -9 -17    5.79    3.14
   0  -9 -17   -0.39    1.77
   0   9  17    4.91    1.96
   0   9  17   -1.96    3.04
   0  -9 -18   10.79    4.32
   0  -9 -18    0.00    4.32
   0   9  18    3.93    3.24
   0   9  18    9.62    4.81
   0  -9 -18    9.91    1.77
   0  -9 -18    7.16    3.24
   0   9  18   10.89    2.06
   0   9  18    7.85    3.24
   0  -9 -19    0.20    4.42
   0  -9 -19    1.96    4.32
   0   9  19   -1.77    3.34
   0   9  19    2.94    4.12
   0  -9 -19    2.75    1.57
   0  -9 -19    2.94    2.55
   0   9  19    1.28    2.75
   0   9  19   -0.39    1.86
   0  -9 -20   -3.14    3.93
   0  -9 -20   -1.96    3.43
   0   9  20    0.49    3.34
   0   9  20    1.18    4.22
   0  -9 -20    1.47    1.96
   0  -9 -20    1.47    1.57
   0   9  20    1.67    1.96
   0   9  20    1.57    2.36
   0  10 -15    0.49    3.43
   0  10 -15    8.83    2.94
   0 -10  15    5.00    1.28
   0 -10  15    3.83    1.28
   0 -10  14    2.26    3.34
   0 -10  14    2.45    2.55
   0  10 -14   -1.86    3.04
   0  10 -14    3.93    2.75
   0 -10  14    1.57    1.86
   0 -10  14    0.88    1.28
   0  10 -14    1.18    0.88
   0  10 -14    1.67    1.47
   0 -10  13    0.59    3.04
   0 -10  13    1.86    2.06
   0  10 -13    0.69    2.75
   0 -10  13    4.61    2.26
   0 -10  13    3.63    1.67
   0  10 -13    2.06    0.98
   0  10 -13    1.67    1.57
   0 -10  12    5.00    2.06
   0 -10  12    0.10    2.94
   0  10 -12   -3.34    2.26
   0  10 -12    2.06    2.75
   0 -10  12   -1.08    1.77
   0 -10  12   -2.75    2.26
   0  10 -12   -1.18    1.08
   0  10 -12   -0.88    1.28
   0 -10  11   23.94    3.34
   0 -10  11   26.20    2.55
   0  10 -11   23.65    2.75
   0  10 -11   25.41    2.94
   0 -10  11   28.46    2.75
   0 -10  11   21.88    2.55
   0  10 -11   25.91    1.67
   0  10 -11   23.35    1.77
   0 -10  10    4.81    2.65
   0 -10  10    1.57    2.06
   0  10 -10    3.93    2.06
   0  10 -10    1.18    2.45
   0 -10  10    3.24    2.36
   0 -10  10    2.45    1.77
   0  10 -10    1.67    1.37
   0  10 -10    5.10    1.08
   0 -10   9   65.94    4.12
   0  10  -9   73.50    4.32
   0 -10   9   81.44    3.83
   0 -10   9   88.31    4.91
   0  10  -9   87.43    3.93
   0  10  -9   86.94    3.63
   0 -10   8  102.44    5.50
   0 -10   8   94.20    4.51
   0  10  -8   91.16    4.71
   0  10  -8   96.46    4.61
   0  10  -8   85.76    3.63
   0  10  -8   78.89    3.73
   0 -10   7   87.53    4.91
   0 -10   7   92.92    4.42
   0  10  -7   88.31    4.51
   0  10  -7   94.00    4.42
   0 -10   7   94.89    4.12
   0 -10   7   85.47    4.61
   0  10  -7   81.64    3.73
   0  10  -7   91.75    3.93
   0 -10   6  141.79    6.48
   0 -10   6  139.34    5.89
   0  10  -6  145.52    6.28
   0  10  -6  136.89    5.79
   0 -10   5   10.40    2.75
   0 -10   5   10.30    2.06
   0  10  -5   12.76    2.26
   0  10  -5   12.17    1.96
   0 -10   5   10.99    1.18
   0 -10   5    5.99    2.55
   0  10  -5   10.99    1.37
   0  10  -5   10.70    1.57
   0 -10   4  226.57    9.13
   0 -10   4  231.58    8.93
   0  10  -4  234.81    9.22
   0  10  -4  225.79    8.73
   0 -10   4  239.13    9.32
   0 -10   4  225.59    9.62
   0  10  -4  241.19    9.52
   0  10  -4  242.76    9.62
   0 -10   3   10.60    2.45
   0 -10   3    9.22    2.16
   0  10  -3    9.62    2.36
   0  10  -3    9.52    2.06
   0 -10   3   11.68    2.85
   0  10  -3    9.52    1.67
   0 -10   2    4.91    2.26
   0 -10   2    7.46    2.16
   0  10  -2    5.20    2.16
   0  10  -2    4.12    2.06
   0 -10   1    6.97    2.45
   0 -10   1    6.18    2.26
   0  10  -1   10.01    2.26
   0  10  -1   10.40    2.16
   0 -10   1    4.42    3.14
   0 -10   1    7.95    1.28
   0  10  -1    8.44    1.86
   0  10   0  172.50    7.07
   0  10   0  185.46    7.46
   0 -10   0  183.49    8.34
   0 -10   0  176.72    7.07
   0 -10  -1   23.26    2.85
   0 -10  -1   22.47    3.04
   0  10   1   23.06    2.85
   0  10   1   20.41    2.55
   0 -10  -1   29.44    3.53
   0 -10  -1   23.26    1.67
   0  10   1   16.39    2.36
   0 -10  -2  604.75   21.88
   0 -10  -2  527.13   19.23
   0  10   2  547.54   19.82
   0  10   2  568.74   20.61
   0 -10  -2  537.34   20.51
   0 -10  -2  555.49   21.98
   0  10   2  540.67   21.00
   0  10   2  544.20   20.90
   0 -10  -3    4.51    2.45
   0 -10  -3    1.57    3.53
   0  10   3    4.71    2.94
   0  10   3    2.94    2.45
   0 -10  -3    5.40    1.47
   0 -10  -3    7.26    3.34
   0  10   3    1.08    2.55
   0  10   3    2.75    1.67
   0 -10  -4    5.40    2.45
   0 -10  -4    5.99    3.73
   0  10   4    2.45    2.75
   0  10   4    0.39    2.45
   0 -10  -4    3.04    1.57
   0 -10  -4    7.26    3.34
   0  10   4    1.18    2.65
   0  10   4    4.42    1.67
   0 -10  -5  279.85   10.79
   0 -10  -5  294.08   12.07
   0  10   5  299.09   11.48
   0  10   5  267.00   10.50
   0 -10  -5  296.83   11.68
   0 -10  -5  286.43   12.36
   0  10   5  289.27   11.48
   0  10   5  292.51   12.36
   0 -10  -6    3.34    2.75
   0 -10  -6   -8.05    4.51
   0  10   6    1.57    2.85
   0  10   6    1.08    2.94
   0 -10  -6    0.59    1.57
   0 -10  -6    4.71    3.34
   0  10   6    4.42    2.85
   0  10   6    2.75    1.67
   0 -10  -7  220.00    8.93
   0 -10  -7  205.77    9.32
   0  10   7  192.72    7.95
   0  10   7  208.91    8.64
   0 -10  -7  194.29    9.32
   0 -10  -7  215.09    8.73
   0  10   7  211.56    8.64
   0  10   7  205.97    9.32
   0 -10  -8   35.52    3.43
   0 -10  -8   29.44    4.81
   0  10   8   39.25    3.43
   0  10   8   34.34    3.83
   0 -10  -8   36.80    2.55
   0 -10  -8   41.02    4.61
   0  10   8   27.97    3.53
   0  10   8   37.48    2.65
   0 -10  -9    2.26    2.94
   0 -10  -9    6.08    4.71
   0  10   9    1.67    2.65
   0  10   9   -1.86    3.43
   0 -10  -9    4.61    3.93
   0 -10  -9   -0.20    1.57
   0  10   9    1.96    2.85
   0  10   9   -2.36    1.77
   0 -10 -10   21.39    3.04
   0 -10 -10   22.67    4.81
   0  10  10   26.10    3.14
   0  10  10   19.33    3.53
   0 -10 -10   22.08    2.16
   0 -10 -10   24.53    4.61
   0  10  10   17.86    3.34
   0  10  10   25.32    2.36
   0 -10 -11   84.29    4.81
   0 -10 -11   78.30    6.28
   0  10  11   86.84    4.81
   0  10  11   76.34    5.20
   0 -10 -11   85.86    4.22
   0 -10 -11   84.88    6.48
   0  10  11   80.86    4.22
   0  10  11   76.64    5.10
   0 -10 -12    9.52    3.14
   0 -10 -12    0.20    4.71
   0  10  12    3.53    2.75
   0  10  12    3.04    4.12
   0 -10 -12    0.20    1.77
   0 -10 -12   -2.94    4.51
   0  10  12    1.28    2.06
   0  10  12    3.83    3.14
   0 -10 -14    3.04    3.73
   0 -10 -14    9.13    4.81
   0  10  14   -1.86    4.71
   0  10  14   -1.47    2.94
   0 -10 -14    8.14    4.61
   0 -10 -14   -0.88    1.77
   0  10  14   -1.67    3.04
   0  10  14    0.10    2.06
   0 -10 -15   -0.20    4.91
   0 -10 -15    4.02    4.02
   0  10  15    5.30    5.00
   0  10  15   -2.26    3.14
   0  10  15    2.85    3.14
   0  10  15    2.75    2.06
   0 -10 -16   10.11    5.50
   0 -10 -16    0.59    4.22
   0  10  16    2.06    3.14
   0  10  16    2.65    5.10
   0 -10 -16   -4.42    3.24
   0 -10 -16   -0.59    1.77
   0  10  16   -0.20    1.86
   0  10  16   -5.79    3.04
   0 -10 -17    3.34    4.71
   0 -10 -17    5.59    4.42
   0  10  17    1.57    5.30
   0  10  17    1.47    3.14
   0 -10 -17   -0.29    1.67
   0 -10 -17    2.55    2.94
   0  10  17   -0.79    1.77
   0  10  17   -0.10    2.85
   0 -10 -18   -2.36    4.71
   0 -10 -18   -1.67    4.51
   0  10  18    3.83    3.53
   0  10  18   -4.81    4.81
   0 -10 -18    0.98    2.85
   0 -10 -18    1.37    1.57
   0  10  18    1.67    1.67
   0  10  18   -1.77    2.65
   0 -10 -19   -2.65    4.61
   0 -10 -19   -5.89    4.22
   0  10  19    2.16    4.71
   0  10  19    0.00    3.83
   0 -10 -19    6.28    1.57
   0 -10 -19    3.53    1.96
   0  10  19   -2.85    2.55
   0 -11  14    0.79    2.45
   0 -11  14    4.22    2.65
   0  11 -14   -0.29    3.43
   0  11 -14    5.10    2.85
   0 -11  14    0.49    1.18
   0 -11  14    1.28    1.28
   0 -11  13   -2.36    3.24
   0 -11  13   -2.45    2.75
   0  11 -13    3.43    2.85
   0  11 -13    3.14    2.94
   0 -11  13    0.69    1.77
   0 -11  13   -0.29    1.47
   0 -11  12   10.30    3.24
   0 -11  12   10.60    2.45
   0  11 -12    3.14    2.75
   0 -11  12   14.42    2.26
   0 -11  12    7.85    1.96
   0  11 -12   12.66    1.37
   0  11 -12    8.93    1.28
   0 -11  11    1.57    2.06
   0 -11  11    0.79    2.94
   0  11 -11   -2.85    2.85
   0  11 -11    1.86    2.36
   0 -11  11    0.88    2.06
   0 -11  11    1.37    1.96
   0  11 -11    2.65    1.28
   0  11 -11    2.26    1.08
   0 -11  10    5.20    2.94
   0 -11  10    9.52    2.16
   0  11 -10   10.70    2.45
   0  11 -10   11.28    2.65
   0 -11  10    8.44    1.67
   0 -11  10   14.23    2.65
   0  11 -10   11.28    1.57
   0  11 -10   11.97    1.18
   0  11  -9   92.53    4.81
   0 -11   9   98.91    4.42
   0 -11   9   91.94    5.10
   0 -11   8   43.67    4.12
   0  11  -8   45.63    3.34
   0 -11   8   40.33    2.16
   0 -11   8   42.19    3.63
   0  11  -8   42.39    2.55
   0  11  -8   44.55    2.26
   0 -11   7   11.58    2.26
   0 -11   7    8.93    3.34
   0  11  -7    9.22    2.55
   0 -11   7   12.17    3.04
   0 -11   7   13.35    1.37
   0  11  -7   13.35    1.37
   0  11  -7   10.79    1.77
   0 -11   6    9.22    2.26
   0 -11   6    6.18    2.94
   0  11  -6    6.18    2.16
   0  11  -6    8.73    2.45
   0  11  -6    9.32    1.77
   0 -11   5    2.16    2.26
   0 -11   5    4.42    2.65
   0  11  -5    9.62    2.55
   0  11  -5    3.63    1.96
   0 -11   4   29.93    3.04
   0 -11   4   26.49    2.75
   0  11  -4   31.79    2.65
   0  11  -4   33.95    3.04
   0 -11   4   26.10    1.67
   0  11  -4   30.62    2.16
   0 -11   3  245.22    9.81
   0 -11   3  249.34    9.62
   0  11  -3  251.40    9.81
   0  11  -3  239.13    9.32
   0 -11   3  259.84   10.11
   0 -11   3  248.16   10.60
   0  11  -3  257.58   10.21
   0  11  -3  258.86   10.30
   0 -11   2   10.99    2.45
   0 -11   2   13.35    2.36
   0  11  -2   12.36    2.26
   0  11  -2   13.84    2.45
   0 -11   2   14.23    3.04
   0 -11   2    9.03    1.18
   0  11  -2    9.52    1.67
   0  11  -2   12.27    1.77
   0 -11   1   67.02    3.93
   0 -11   1   74.97    4.32
   0  11  -1   80.07    4.22
   0  11  -1   69.77    3.93
   0 -11   1   76.05    3.43
   0 -11   1   78.01    5.00
   0  11  -1   78.60    4.02
   0  11  -1   78.11    3.83
   0 -11   0   62.11    4.02
   0 -11   0   64.57    3.93
   0  11   0   64.08    3.93
   0  11   0   63.19    3.73
   0 -11   0   51.52    4.81
   0  11   0   61.23    3.24
   0  11   0   66.14    3.63
   0 -11  -1    2.55    2.36
   0 -11  -1    4.32    2.94
   0  11   1    3.63    2.65
   0  11   1    4.61    2.26
   0 -11  -1    8.73    3.24
   0 -11  -1    1.47    1.08
   0  11   1    2.45    1.86
   0  11   1    5.79    1.67
   0 -11  -2   12.46    3.24
   0 -11  -2   10.70    2.65
   0  11   2    5.30    2.36
   0  11   2   10.01    2.85
   0 -11  -2   10.11    1.37
   0 -11  -2   11.97    3.43
   0 -11  -3   98.91    5.59
   0 -11  -3   97.24    5.00
   0  11   3  106.66    5.40
   0  11   3   95.67    4.91
   0 -11  -3   98.32    4.42
   0 -11  -3   95.28    5.79
   0  11   3   94.30    5.00
   0  11   3  107.06    4.91
   0 -11  -4    5.89    3.73
   0 -11  -4   10.99    2.65
   0  11   4   10.40    2.94
   0  11   4   11.38    2.75
   0 -11  -4   12.56    3.53
   0 -11  -4   10.79    1.67
   0  11   4    7.65    1.77
   0  11   4    7.36    2.75
   0 -11  -5   37.88    4.91
   0 -11  -5   28.26    2.94
   0  11   5   33.66    3.43
   0  11   5   30.81    3.24
   0 -11  -5   36.50    2.45
   0 -11  -5   37.19    4.32
   0  11   5   35.72    2.45
   0  11   5   38.76    3.63
   0 -11  -6   12.36    2.85
   0 -11  -6   19.13    4.81
   0  11   6   14.23    3.04
   0  11   6   10.89    3.14
   0 -11  -6    6.77    3.53
   0 -11  -6   11.48    1.67
   0  11   6   12.56    3.14
   0  11   6   11.78    1.96
   0 -11  -7    8.44    4.42
   0 -11  -7   11.48    2.94
   0  11   7    5.50    3.24
   0  11   7   12.27    2.85
   0 -11  -7    7.75    1.67
   0 -11  -7   11.87    3.63
   0  11   7    7.65    3.04
   0  11   7   10.79    1.86
   0 -11  -8   31.60    4.81
   0 -11  -8   39.05    3.63
   0  11   8   36.01    3.43
   0  11   8   45.92    4.12
   0 -11  -8   33.56    4.42
   0 -11  -8   37.19    2.55
   0  11   8   36.31    2.65
   0  11   8   35.52    3.83
   0 -11  -9    3.34    4.71
   0 -11  -9   11.78    3.24
   0  11   9    5.50    2.94
   0  11   9   11.78    3.63
   0 -11  -9   -0.69    3.93
   0 -11  -9    7.85    1.67
   0  11   9    8.14    3.14
   0  11   9    4.61    1.86
   0 -11 -10   24.83    3.63
   0 -11 -10   18.55    5.30
   0  11  10   24.24    3.34
   0  11  10   21.69    4.12
   0 -11 -10   27.77    4.71
   0 -11 -10   26.59    2.26
   0  11  10   17.47    3.53
   0  11  10   23.35    2.45
   0 -11 -11   -1.08    4.71
   0  11  11    1.86    3.04
   0 -11 -11    0.59    4.81
   0  11  11   -2.75    2.16
   0 -11 -12   -1.18    3.24
   0  11  12    0.59    3.83
   0 -11 -12    2.85    1.77
   0 -11 -12    6.38    5.30
   0  11  12    1.57    3.24
   0  11  12   -0.59    2.16
   0 -11 -13    2.06    3.53
   0 -11 -13  -10.79    4.91
   0  11  13   -1.67    2.85
   0  11  13   -3.73    4.12
   0 -11 -13   -7.26    4.42
   0 -11 -13    2.94    1.77
   0  11  13    7.36    3.24
   0  11  13    2.55    2.06
   0 -11 -14    5.20    5.10
   0 -11 -14   20.12    4.22
   0  11  14   18.84    4.91
   0  11  14   19.04    3.34
   0 -11 -14   10.01    1.86
   0 -11 -14    6.67    3.83
   0  11  14   16.09    2.36
   0  11  14    9.22    3.24
   0 -11 -15    4.12    4.71
   0 -11 -15    6.38    5.10
   0  11  15    1.67    3.34
   0  11  15    8.83    5.00
   0 -11 -15    0.39    1.67
   0 -11 -15    4.02    3.24
   0  11  15    4.32    1.96
   0  11  15   -0.59    3.04
   0 -11 -16    1.08    5.00
   0 -11 -16   -0.49    4.61
   0  11  16    1.18    5.20
   0  11  16   -1.08    3.34
   0 -11 -16    0.88    1.67
   0 -11 -16    1.28    2.94
   0  11  16   -0.39    2.85
   0  11  16    2.65    1.77
   0 -11 -17   -5.99    4.51
   0 -11 -17    6.18    4.71
   0  11  17    1.28    3.53
   0  11  17    4.32    5.10
   0 -11 -17    0.49    3.04
   0 -11 -17    2.36    1.57
   0  11  17    2.16    1.67
   0  11  17   -0.98    2.65
   0 -11 -18    4.61    4.91
   0 -11 -18    2.65    4.81
   0  11  18   -0.79    3.73
   0  11  18   -0.10    4.51
   0 -11 -18   -0.20    1.57
   0  11  18    0.98    1.77
   0  11  18   -2.65    2.45
   0 -11 -19   -4.71    4.22
   0  11  19   -5.79    3.83
   0 -12  13   -2.65    2.26
   0 -12  13   -0.59    2.65
   0  12 -13    0.20    3.14
   0  12 -13    2.36    2.75
   0 -12  12   -2.36    2.75
   0 -12  12    2.45    2.94
   0  12 -12   -0.69    2.75
   0  12 -12   -0.39    2.94
   0 -12  12   -0.69    1.47
   0 -12  12   -1.96    1.67
   0  12 -11    7.65    2.94
   0 -12  11   13.15    2.36
   0 -12  11   17.17    1.86
   0 -12  10    2.94    2.16
   0 -12  10    1.86    2.75
   0  12 -10    1.18    2.45
   0  12 -10   -0.20    3.04
   0 -12  10    4.22    1.37
   0 -12  10    3.24    2.45
   0  12 -10    2.65    1.47
   0  12 -10    4.32    1.08
   0 -12   9   44.75    4.32
   0 -12   9   37.39    2.85
   0  12  -9   39.54    3.53
   0  12  -9   49.85    3.53
   0 -12   9   40.23    2.45
   0 -12   9   46.81    3.83
   0  12  -9   39.25    2.45
   0 -12   8   37.58    2.85
   0 -12   8   43.18    4.12
   0  12  -8   44.06    3.43
   0  12  -8   34.34    3.14
   0 -12   7   19.53    2.45
   0 -12   7   15.70    3.43
   0  12  -7   16.29    2.65
   0  12  -7   15.80    2.65
   0  12  -7   17.07    1.47
   0 -12   6   12.27    3.34
   0  12  -6   16.39    2.55
   0 -12   6   16.78    3.34
   0 -12   6   18.94    1.57
   0  12  -6   18.35    1.57
   0  12  -6   16.49    2.06
   0  12  -5   -2.26    2.75
   0 -12   5    2.06    1.08
   0 -12   5   -2.26    3.04
   0  12  -5   -1.37    1.28
   0  12  -5    0.20    1.67
   0 -12   4   65.16    3.93
   0 -12   4   66.82    4.22
   0  12  -4   73.69    4.32
   0  12  -4   71.73    4.02
   0 -12   4   66.23    4.61
   0 -12   4   66.43    3.04
   0  12  -4   65.06    3.34
   0  12  -4   69.96    3.63
   0 -12   3   20.21    2.94
   0 -12   3   22.37    2.75
   0  12  -3   20.80    2.55
   0  12  -3   22.77    2.94
   0 -12   3   18.06    3.34
   0 -12   3   19.92    1.57
   0  12  -3   19.72    1.96
   0  12  -3   20.61    2.06
   0 -12   2    2.94    2.45
   0 -12   2    1.18    2.36
   0  12  -2    0.88    2.16
   0  12  -2    4.51    2.55
   0 -12   2   -0.20    3.04
   0 -12   2    0.10    1.08
   0  12  -2    4.32    1.67
   0  12  -2    3.04    1.57
   0 -12   1    1.57    2.85
   0 -12   1    0.10    2.45
   0  12  -1    0.00    2.26
   0  12  -1    0.88    2.65
   0 -12   1    0.29    1.08
   0 -12   1    2.26    3.04
   0  12  -1   -1.37    1.67
   0  12  -1    0.20    1.67
   0 -12   0  104.80    5.30
   0 -12   0   97.83    5.20
   0  12   0  107.55    5.20
   0  12   0   92.04    5.00
   0 -12   0  106.17    4.61
   0 -12   0  102.35    5.99
   0  12   0  103.13    4.71
   0  12   0  100.28    4.91
   0 -12  -1   15.41    3.34
   0 -12  -1   13.25    2.65
   0  12   1   15.70    2.65
   0  12   1   14.13    3.04
   0 -12  -1   12.56    1.47
   0  12   1   15.99    1.96
   0  12   1   14.42    2.16
   0 -12  -2   65.16    4.22
   0 -12  -2   74.08    4.81
   0 -12  -2   72.91    3.43
   0 -12  -2   78.40    5.20
   0  12   2   72.91    3.73
   0  12   2   68.88    3.93
   0 -12  -3   29.14    3.24
   0 -12  -3   28.85    4.22
   0  12   3   34.15    3.83
   0  12   3   36.90    3.34
   0 -12  -3   28.16    1.96
   0 -12  -3   30.71    3.83
   0  12   3   30.22    2.45
   0 -12  -4    0.20    2.65
   0 -12  -4    3.43    3.73
   0  12   4    2.16    2.75
   0  12   4    3.53    3.04
   0 -12  -4    2.94    1.37
   0 -12  -4    3.04    3.34
   0  12   4    3.14    2.45
   0  12   4    2.36    1.67
   0 -12  -5   52.30    5.20
   0 -12  -5   40.13    3.43
   0  12   5   42.68    3.73
   0  12   5   46.02    3.93
   0 -12  -5   44.55    4.42
   0 -12  -5   51.32    2.85
   0  12   5   57.01    4.12
   0  12   5   51.71    3.04
   0 -12  -6   14.82    4.81
   0 -12  -6   14.13    2.85
   0  12   6   11.87    3.24
   0  12   6   15.90    3.24
   0 -12  -6   21.88    3.83
   0 -12  -6   15.80    1.86
   0  12   6   15.70    1.96
   0  12   6   14.82    3.24
   0 -12  -7   13.64    3.14
   0 -12  -7    4.32    4.91
   0  12   7   11.19    3.14
   0  12   7   10.40    3.43
   0 -12  -7    9.52    1.77
   0 -12  -7   12.85    3.73
   0  12   7   11.78    1.96
   0  12   7   11.97    3.14
   0 -12  -8    2.75    4.71
   0 -12  -8    2.45    3.14
   0  12   8    2.06    3.53
   0  12   8    4.71    3.14
   0 -12  -8    1.67    3.83
   0 -12  -8    0.49    1.57
   0  12   8    0.20    1.77
   0  12   8    2.94    3.04
   0 -12  -9    0.59    5.00
   0  12   9    7.95    3.34
   0 -12 -10    0.59    3.63
   0  12  10    4.51    4.02
   0  12  10    7.46    3.83
   0 -12 -11   37.97    5.89
   0 -12 -11   50.63    4.32
   0  12  11   43.27    4.51
   0  12  11   47.20    4.22
   0 -12 -11   42.78    2.85
   0 -12 -11   47.00    5.40
   0  12  11   48.38    3.14
   0  12  11   45.04    4.42
   0 -12 -12    0.98    5.00
   0 -12 -12    5.89    3.73
   0  12  12    1.47    3.14
   0  12  12    9.62    4.32
   0 -12 -12    0.10    1.67
   0 -12 -12   -0.98    4.12
   0  12  12    0.49    3.14
   0  12  12    0.88    1.86
   0 -12 -13    6.77    5.30
   0 -12 -13    3.63    4.32
   0  12  13    7.16    4.71
   0  12  13    3.63    3.24
   0 -12 -13    2.36    3.43
   0 -12 -13    5.59    1.77
   0  12  13    7.26    2.06
   0  12  13   12.76    3.24
   0 -12 -14    0.79    4.61
   0 -12 -14   -1.37    4.61
   0  12  14   -0.20    4.81
   0  12  14    2.75    3.43
   0 -12 -14    0.39    1.67
   0 -12 -14   -0.59    3.04
   0  12  14    0.00    1.86
   0  12  14    1.08    2.94
   0 -12 -15    0.39    4.42
   0 -12 -15    4.22    5.10
   0  12  15   -0.79    4.91
   0  12  15    3.83    3.53
   0 -12 -15    4.91    2.85
   0 -12 -15    5.89    1.77
   0  12  15    6.57    1.86
   0  12  15    7.85    3.04
   0 -12 -16    5.30    4.81
   0 -12 -16   -1.18    4.51
   0  12  16   -2.45    3.73
   0  12  16    1.37    4.91
   0 -12 -16    3.63    2.85
   0 -12 -16    1.96    1.57
   0  12  16    2.75    1.77
   0  12  16    1.47    2.75
   0  12  17    0.98    3.93
   0  12  17    1.08    4.42
   0 -12 -17   -3.43    1.67
   0 -12 -17    2.94    1.96
   0  12  17    5.50    2.65
   0  12  17    1.86    1.67
   0 -12 -18    4.32    4.81
   0 -12 -18   -0.79    4.22
   0  12  18    2.85    3.73
   0  12  18   -1.96    4.51
   0 -12 -18    1.18    1.47
   0 -12 -18    0.39    1.67
   0  12  18    0.69    1.67
   0  12  18   -0.98    2.45
   0 -13  11   -3.73    2.36
   0 -13  11   -5.20    2.65
   0  13 -11    1.28    3.34
   0  13 -11    1.37    2.75
   0 -13  11   -2.45    1.67
   0 -13  11    0.69    1.37
   0 -13  10   -0.49    2.85
   0 -13  10    5.79    2.65
   0  13 -10   -3.83    2.75
   0  13 -10   -0.49    1.37
   0 -13   9   11.28    2.36
   0 -13   9    5.00    3.43
   0  13  -9    7.56    3.14
   0  13  -9    1.28    2.85
   0  13  -9    5.59    1.08
   0 -13   8   45.24    4.32
   0 -13   8   49.85    3.34
   0  13  -8   52.10    4.22
   0  13  -8   50.83    3.93
   0 -13   8   54.75    4.32
   0 -13   8   46.22    2.36
   0  13  -8   50.73    2.55
   0  13  -8   52.89    3.04
   0 -13   7    5.89    3.14
   0 -13   7    2.65    2.16
   0  13  -7    1.67    2.85
   0  13  -7    6.08    2.55
   0 -13   7   -1.47    3.04
   0 -13   7    4.02    1.18
   0  13  -7    2.45    1.18
   0  13  -7    1.57    1.67
   0 -13   6   -2.06    3.14
   0 -13   6   -1.47    2.16
   0  13  -6   -0.88    2.65
   0  13  -6    1.57    2.36
   0  13  -6   -1.77    1.18
   0  13  -6    1.28    1.67
   0 -13   5    4.91    3.04
   0 -13   5    1.47    2.26
   0  13  -5    2.45    2.65
   0  13  -5    0.79    2.36
   0 -13   5    6.18    3.14
   0 -13   5    1.86    1.08
   0  13  -5    0.10    1.37
   0  13  -5    3.04    1.77
   0 -13   4   -0.10    2.75
   0 -13   4   -0.29    2.36
   0  13  -4   -1.28    2.26
   0  13  -4    1.77    2.65
   0 -13   4    0.10    0.98
   0 -13   4    5.50    3.24
   0  13  -4   -0.39    1.77
   0  13  -4   -0.88    1.37
   0 -13   3    7.95    2.94
   0  13  -3   15.60    2.65
   0 -13   3   13.54    1.37
   0 -13   3    9.32    3.43
   0  13  -3   14.23    2.06
   0  13  -3   12.66    1.77
   0 -13   2    7.07    3.43
   0 -13   2    6.97    1.18
   0  13  -2    6.38    1.77
   0  13  -2    7.56    1.86
   0 -13   1    0.59    3.24
   0  13  -1    0.79    3.14
   0 -13   1   -0.98    1.08
   0 -13   1   -0.79    3.43
   0  13  -1    1.08    1.77
   0  13  -1    1.77    1.77
   0 -13   0    3.83    3.34
   0 -13   0    4.42    2.75
   0  13   0    2.45    3.24
   0  13   0    2.65    2.75
   0 -13   0    5.89    1.28
   0 -13   0    8.05    3.53
   0  13   0    8.14    2.16
   0  13   0    4.71    1.77
   0 -13  -1    1.77    2.65
   0 -13  -1    2.85    3.43
   0  13   1    1.77    2.55
   0  13   1    0.49    3.24
   0 -13  -1    6.38    3.63
   0 -13  -1    1.86    1.18
   0  13   1    3.63    1.77
   0  13   1    3.63    2.06
   0 -13  -2   18.06    3.04
   0 -13  -2   20.31    3.93
   0  13   2   15.41    2.94
   0  13   2   18.06    3.53
   0 -13  -2   22.86    1.77
   0 -13  -2   24.24    4.02
   0  13   2   20.80    2.16
   0  13   2   18.94    2.45
   0 -13  -3   -0.20    2.85
   0 -13  -3   -1.18    4.12
   0  13   3   -2.06    3.73
   0  13   3   -0.29    2.65
   0 -13  -3    0.59    1.18
   0 -13  -3    4.51    3.53
   0  13   3    0.59    1.77
   0  13   3   -0.10    2.06
   0 -13  -4    0.49    3.04
   0 -13  -4    5.59    4.22
   0  13   4   -1.86    2.85
   0  13   4    0.79    3.43
   0 -13  -4    1.08    1.28
   0 -13  -4   -3.04    3.43
   0  13   4    4.02    1.77
   0  13   4   -2.65    2.36
   0  13   5   11.58    3.53
   0 -13  -5    9.62    3.83
   0 -13  -5    9.81    1.67
   0  13   5    7.56    2.75
   0  13   5   10.79    1.86
   0  13   6    7.85    3.93
   0 -13  -6    7.56    4.02
   0 -13  -6   12.66    1.77
   0  13   6    9.03    3.14
   0  13   6    6.28    1.86
   0 -13  -7    4.71    1.67
   0 -13  -7   11.87    4.22
   0  13   7    7.07    1.96
   0  13   7    0.49    3.34
   0 -13  -8   31.20    3.83
   0 -13  -8   19.53    5.40
   0  13   8   32.09    4.12
   0  13   8   23.35    4.02
   0 -13  -9   -4.02    3.34
   0 -13  -9    2.45    5.10
   0  13   9   -3.83    3.53
   0  13   9    0.98    3.34
   0 -13  -9    0.69    4.02
   0 -13  -9    2.36    1.67
   0  13   9    5.40    3.24
   0  13   9    0.20    1.77
   0 -13 -10    9.13    3.53
   0 -13 -10    6.28    5.20
   0  13  10    3.93    3.43
   0  13  10    9.32    3.93
   0 -13 -10    8.73    4.12
   0 -13 -10    5.40    1.77
   0  13  10    6.97    1.96
   0  13  10    3.43    3.14
   0 -13 -11    0.69    3.83
   0 -13 -11   -4.61    5.30
   0  13  11    1.77    3.43
   0  13  11   -4.42    4.22
   0 -13 -11    2.26    1.57
   0 -13 -11   -3.53    3.43
   0  13  11    1.47    1.86
   0  13  11   -2.06    3.04
   0 -13 -12    4.32    4.32
   0 -13 -12    4.51    5.10
   0  13  12    2.65    4.71
   0  13  12    0.10    3.63
   0 -13 -12    3.63    1.67
   0 -13 -12    7.16    3.14
   0  13  12    1.37    1.86
   0  13  12    2.75    3.24
   0 -13 -13    5.69    4.81
   0 -13 -13    3.14    5.10
   0  13  13    5.69    3.73
   0  13  13   -2.94    5.30
   0 -13 -13    8.64    2.94
   0 -13 -13    0.59    1.57
   0  13  13    0.20    2.94
   0  13  13    0.69    1.77
   0 -13 -14   28.65    5.89
   0 -13 -14   14.62    4.91
   0  13  14   23.45    5.50
   0  13  14   18.35    4.42
   0 -13 -14   18.35    1.96
   0 -13 -14   13.15    2.94
   0  13  14   14.13    3.14
   0  13  14   17.86    2.16
   0 -13 -15   -2.65    5.10
   0 -13 -15    0.39    4.32
   0  13  15   -2.85    3.83
   0  13  15   -0.88    5.10
   0 -13 -15   -2.85    2.65
   0 -13 -15    0.10    1.47
   0  13  15   -0.10    1.67
   0  13  15    0.20    2.75
   0 -13 -16    5.50    4.51
   0 -13 -16   -0.39    4.42
   0  13  16   -0.79    4.51
   0  13  16   -0.98    3.93
   0 -13 -16    1.08    1.67
   0 -13 -16    0.39    1.86
   0  13  16    1.86    1.67
   0  13  16    1.96    2.65
   0 -13 -17   -3.24    4.61
   0 -13 -17    5.59    4.42
   0  13  17   -2.94    3.63
   0  13  17   -3.24    4.51
   0 -13 -17    0.69    1.57
   0 -13 -17    1.18    1.57
   0  13  17   -0.79    1.67
   0  13  17   -0.39    2.45
   0 -14  10    1.18    2.45
   0 -14  10   -1.47    2.85
   0  14 -10   -1.18    3.14
   0  14 -10   -2.16    2.94
   0 -14  10    1.18    1.47
   0 -14  10   -0.20    1.57
   0 -14   9    5.20    3.34
   0 -14   9    4.22    2.94
   0  14  -9   -2.36    2.75
   0 -14   9    0.88    1.37
   0 -14   9    3.24    1.86
   0  14  -9    0.98    1.37
   0  14  -9    0.59    0.88
   0 -14   8    4.42    2.75
   0 -14   8   -3.24    3.24
   0  14  -8    5.30    3.04
   0  14  -8   -1.57    2.94
   0 -14   8    0.20    0.98
   0 -14   8   -0.88    2.45
   0  14  -8    0.59    1.47
   0  14  -8    0.88    0.98
   0 -14   7    2.65    2.45
   0 -14   7    0.69    3.14
   0  14  -7    1.18    3.34
   0  14  -7   -0.39    2.75
   0 -14   7    2.55    1.08
   0 -14   7   -0.98    2.75
   0  14  -7   -1.18    1.57
   0  14  -7   -1.67    1.08
   0 -14   6    8.24    3.24
   0 -14   6   11.28    2.55
   0  14  -6   16.39    3.43
   0  14  -6   10.70    2.85
   0 -14   6   14.92    3.43
   0 -14   6   13.54    1.37
   0  14  -6   10.70    1.37
   0  14  -6   13.25    1.96
   0 -14   5    5.20    3.04
   0 -14   5   -1.47    2.36
   0  14  -5   -3.63    2.45
   0  14  -5    1.57    3.04
   0 -14   5    1.08    0.98
   0 -14   5   -7.36    3.24
   0  14  -5    0.59    1.77
   0  14  -5    0.39    1.37
   0 -14   4    0.00    2.55
   0 -14   4    0.29    2.94
   0  14  -4    1.08    2.94
   0  14  -4    5.00    2.55
   0 -14   4    3.14    3.14
   0 -14   4    4.61    1.08
   0  14  -4    4.12    1.47
   0  14  -4    5.40    1.77
   0 -14   3   -0.59    2.45
   0 -14   3    0.88    2.94
   0  14  -3    2.85    2.85
   0  14  -3   -0.29    2.45
   0 -14   3    1.37    0.98
   0 -14   3    2.55    3.14
   0  14  -3    0.69    1.57
   0  14  -3    1.47    1.67
   0 -14   2    2.45    2.75
   0 -14   2   -0.59    3.04
   0  14  -2    5.50    2.55
   0  14  -2    2.16    3.14
   0 -14   2    8.05    3.34
   0 -14   2    2.06    1.08
   0  14  -2    1.96    1.67
   0  14  -2    4.22    1.77
   0 -14   1   -0.88    2.65
   0 -14   1    4.81    3.14
   0  14  -1    5.59    3.24
   0  14  -1   -2.16    2.55
   0 -14   1    3.24    3.24
   0 -14   1    3.43    1.08
   0  14  -1    2.45    1.77
   0  14  -1    0.20    1.77
   0 -14   0   15.01    3.04
   0 -14   0   15.80    3.34
   0  14   0   15.41    2.94
   0  14   0    9.42    3.34
   0 -14   0   16.49    3.53
   0 -14   0    9.62    1.28
   0  14   0   16.49    2.26
   0  14   0   10.01    1.96
   0 -14  -1   18.25    3.14
   0 -14  -1   19.72    3.53
   0  14   1    9.42    2.94
   0  14   1   10.30    3.43
   0 -14  -1   17.17    3.63
   0 -14  -1   14.92    1.47
   0  14   1   16.58    2.36
   0  14   1   17.96    2.06
   0 -14  -2    9.13    3.63
   0 -14  -2    2.85    2.85
   0  14   2    6.28    2.75
   0  14   2    3.53    3.53
   0 -14  -2    8.73    3.43
   0 -14  -2    8.05    1.37
   0  14   2   11.09    1.86
   0  14   2    7.65    2.16
   0 -14  -3   -1.57    2.85
   0 -14  -3    4.71    3.93
   0  14   3    0.39    3.43
   0  14   3   -0.98    2.75
   0 -14  -3    0.79    1.18
   0 -14  -3   -5.50    3.24
   0  14   3    0.79    2.06
   0  14   3   -2.65    1.67
   0 -14  -4   -3.34    4.12
   0 -14  -4    0.69    3.04
   0  14   4   -0.59    2.85
   0  14   4    3.04    3.43
   0 -14  -4   -0.10    3.34
   0 -14  -4   -0.79    1.28
   0  14   4    0.20    1.77
   0  14   4    0.20    2.16
   0 -14  -5    4.91    3.24
   0 -14  -5    3.43    4.61
   0  14   5    1.77    2.94
   0  14   5    7.56    3.63
   0 -14  -5    2.26    1.37
   0 -14  -5   -0.59    3.43
   0  14   5    3.04    1.77
   0 -14  -6   -9.81    4.91
   0 -14  -6   -6.08    3.04
   0  14   6    1.77    3.14
   0  14   6   -1.67    3.73
   0 -14  -7    6.87    3.24
   0 -14  -7    7.65    5.50
   0  14   7   11.38    4.02
   0  14   7    4.42    3.34
   0 -14  -7   11.38    3.73
   0 -14  -7    7.95    1.67
   0  14   7    4.42    3.04
   0  14   7    8.14    1.86
   0 -14  -8   -0.10    5.00
   0 -14  -8   -5.10    3.24
   0  14   8   -2.36    3.53
   0  14   8   -1.28    3.43
   0 -14  -8    0.79    3.53
   0 -14  -8    3.34    1.57
   0  14   8    0.10    1.77
   0  14   8    0.98    3.04
   0 -14  -9   -0.10    3.63
   0 -14  -9    5.30    5.10
   0  14   9    1.18    4.12
   0  14   9   -0.10    3.63
   0 -14  -9    5.89    3.24
   0 -14  -9   -0.88    1.47
   0  14   9    6.57    1.86
   0  14   9    1.37    2.94
   0 -14 -10   -1.67    4.12
   0 -14 -10   -5.40    5.20
   0  14  10    4.12    4.02
   0  14  10   -1.57    4.32
   0 -14 -10    4.51    3.14
   0 -14 -10    2.16    1.47
   0  14  10    0.20    3.04
   0  14  10    3.04    1.77
   0 -14 -11   11.97    4.51
   0 -14 -11   12.07    5.59
   0  14  11   16.49    5.20
   0  14  11   13.84    4.32
   0 -14 -11    8.14    1.67
   0 -14 -11    5.00    3.04
   0  14  11    9.62    1.96
   0  14  11    5.30    3.04
   0 -14 -12    3.93    4.81
   0 -14 -12    6.77    5.10
   0  14  12    2.16    4.22
   0  14  12   11.68    4.91
   0 -14 -12    2.94    2.75
   0 -14 -12    2.16    1.47
   0  14  12    2.26    1.67
   0  14  12    0.59    2.85
   0 -14 -13    7.95    4.71
   0 -14 -13    9.22    5.20
   0  14  13   -0.20    4.32
   0  14  13    1.77    4.81
   0 -14 -13    1.86    1.47
   0 -14 -13    3.43    2.75
   0  14  13    1.77    1.77
   0  14  13    0.29    2.75
   0 -14 -14    3.93    4.91
   0 -14 -14    1.08    4.12
   0  14  14    3.43    4.22
   0  14  14    5.20    5.10
   0 -14 -14    2.16    2.45
   0 -14 -14    1.86    1.47
   0  14  14   -0.59    1.67
   0  14  14   -1.18    2.75
   0 -14 -15   -3.73    4.61
   0 -14 -15   -4.42    3.83
   0  14  15    2.85    3.73
   0  14  15    1.96    5.00
   0 -14 -15   -1.47    1.47
   0 -14 -15    1.96    1.77
   0  14  15    2.36    2.55
   0  14  15   -0.59    1.57
   0 -14 -16   -6.57    3.93
   0  14  16    4.12    3.53
   0 -15   8    2.06    2.94
   0 -15   8    1.86    3.04
   0  15  -8    0.88    2.65
   0 -15   8    4.42    1.18
   0 -15   8    2.55    1.77
   0  15  -8    3.93    1.08
   0  15  -8    0.39    1.47
   0  15  -7    4.51    2.85
   0  15  -7    5.40    3.24
   0 -15   7    4.22    1.96
   0 -15   7    6.97    1.18
   0  15  -7    8.34    1.57
   0  15  -7    4.61    1.08
   0 -15   6    4.02    3.34
   0 -15   6    7.26    3.14
   0  15  -6    3.43    3.04
   0  15  -6    1.77    3.14
   0 -15   6    3.83    1.08
   0 -15   6    4.02    2.45
   0  15  -6    3.93    1.67
   0  15  -6    3.53    1.18
   0 -15   5    3.63    3.14
   0 -15   5    5.69    2.85
   0  15  -5    4.42    3.43
   0  15  -5   -2.94    2.85
   0 -15   5    5.89    2.85
   0 -15   5    2.36    0.98
   0  15  -5    2.75    1.28
   0  15  -5    4.22    1.77
   0 -15   4    4.61    2.85
   0 -15   4    7.75    3.04
   0  15  -4    2.45    2.85
   0  15  -4    9.32    3.73
   0 -15   4    3.73    0.98
   0 -15   4    3.83    3.24
   0  15  -4    2.06    1.37
   0  15  -4    3.14    1.77
   0 -15   3    2.55    3.14
   0 -15   3   -0.98    2.94
   0  15  -3   -3.34    3.93
   0  15  -3    1.86    2.85
   0 -15   3   -3.24    3.34
   0 -15   3    0.69    0.98
   0  15  -3   -0.88    1.77
   0  15  -3   -0.88    1.47
   0 -15   2   -2.55    3.34
   0 -15   2    2.75    3.04
   0  15  -2    1.96    3.83
   0  15  -2    2.55    2.94
   0 -15   2   -3.34    3.34
   0 -15   2   -1.37    0.98
   0  15  -2   -1.18    1.47
   0  15  -2    3.73    1.86
   0 -15   1    0.88    3.63
   0 -15   1    0.69    3.04
   0  15  -1   -2.94    3.93
   0  15  -1    1.57    2.94
   0 -15   1    2.45    1.08
   0 -15   1    1.57    3.14
   0  15  -1    3.93    1.77
   0  15  -1    3.93    1.77
   0 -15   0    5.99    3.83
   0 -15   0    3.43    3.14
   0  15   0   -1.77    3.83
   0  15   0    6.77    3.04
   0 -15   0    3.43    1.08
   0 -15   0    0.59    3.14
   0  15   0    2.36    1.57
   0  15   0    3.73    1.86
   0 -15  -1   -1.18    3.04
   0 -15  -1    4.71    3.83
   0  15   1   -1.47    3.93
   0  15   1   -4.12    2.94
   0 -15  -1   -0.88    3.04
   0 -15  -1    1.77    1.08
   0  15   1    0.59    2.06
   0  15   1    2.55    1.57
   0 -15  -2    1.86    2.94
   0 -15  -2    2.45    4.02
   0  15   2   -1.37    4.02
   0  15   2    0.59    2.85
   0 -15  -2    1.77    1.18
   0 -15  -2    7.26    3.14
   0  15   2   -0.29    1.57
   0  15   2   -0.20    2.06
   0 -15  -3    1.86    4.02
   0 -15  -3    2.45    3.04
   0  15   3    1.86    2.94
   0  15   3    1.47    3.93
   0 -15  -3   -0.59    3.43
   0  15   3    2.16    1.67
   0 -15  -4   10.60    4.42
   0 -15  -4    0.39    3.24
   0  15   4    2.65    4.12
   0  15   4   -0.10    2.94
   0  15   4    3.53    2.26
   0 -15  -5    7.75    3.53
   0 -15  -5    7.75    4.71
   0  15   5    2.65    4.22
   0  15   5    5.59    3.24
   0 -15  -5    3.73    3.53
   0  15   5    5.30    1.67
   0  15   5    2.94    2.26
   0 -15  -6   15.99    3.93
   0 -15  -6    1.28    5.10
   0  15   6   11.68    3.53
   0  15   6   23.45    4.91
   0 -15  -6   16.78    3.43
   0 -15  -6   14.23    1.67
   0  15   6   20.61    2.85
   0  15   6   15.60    1.86
   0 -15  -7    1.18    5.20
   0 -15  -7    1.18    3.73
   0  15   7    0.79    3.53
   0  15   7    0.20    5.10
   0 -15  -7    0.69    1.37
   0 -15  -7   -1.86    3.04
   0  15   7    1.77    2.65
   0 -15  -8    7.46    3.93
   0 -15  -8    2.85    4.91
   0  15   8   -1.96    4.91
   0  15   8    0.59    3.83
   0 -15  -8    4.22    1.47
   0 -15  -8    6.48    3.04
   0  15   8    2.16    1.67
   0  15   8    2.75    2.85
   0 -15  -9   -6.97    3.73
   0 -15  -9   -6.38    5.00
   0  15   9   -1.57    4.71
   0  15   9   -1.96    4.02
   0 -15  -9    2.36    2.85
   0 -15  -9    0.79    1.37
   0  15   9   -0.29    2.85
   0  15   9    0.88    1.67
   0 -15 -10   -9.32    5.10
   0 -15 -10    3.73    4.51
   0  15  10    1.37    4.32
   0  15  10    1.18    4.51
   0 -15 -10   -0.69    1.37
   0 -15 -10    0.69    2.65
   0  15  10   -0.10    1.57
   0  15  10   -0.59    2.75
   0 -15 -11    9.91    5.00
   0 -15 -11    5.30    5.10
   0  15  11   -0.29    4.32
   0  15  11    3.73    4.81
   0 -15 -11    0.49    2.75
   0 -15 -11   -0.49    1.37
   0  15  11    1.28    2.75
   0  15  11    3.34    1.77
   0 -15 -12   -1.57    4.51
   0 -15 -12    5.50    4.81
   0  15  12    1.86    4.61
   0  15  12    4.22    4.91
   0 -15 -12   -0.49    1.47
   0 -15 -12   -2.55    2.55
   0  15  12   -3.04    2.94
   0  15  12   -0.98    1.57
   0 -15 -13    1.77    4.61
   0 -15 -13   -1.86    3.93
   0  15  13   -3.43    4.22
   0  15  13   -3.93    4.91
   0 -15 -13    2.06    1.77
   0 -15 -13    0.59    1.47
   0  15  13    2.75    2.65
   0  15  13    0.49    1.57
   0 -15 -14    0.10    4.32
   0 -15 -14    0.00    3.73
   0  15  14   -0.98    3.53
   0  15  14   -1.28    4.71
   0 -15 -14    1.18    1.67
   0 -15 -14   -0.10    1.47
   0  15  14    0.79    1.57
   0  15  14    1.67    2.65
   0 -16   6   -1.47    2.94
   0 -16   6    5.59    3.14
   0  16  -6    0.10    3.34
   0  16  -6    1.47    2.65
   0 -16   6    0.49    1.57
   0 -16   6    1.37    1.18
   0  16  -6   -0.69    1.18
   0  16  -6    0.10    1.57
   0 -16   5    0.20    3.14
   0 -16   5    3.83    3.24
   0  16  -5    1.47    3.53
   0  16  -5    0.59    2.65
   0 -16   5    4.81    1.77
   0 -16   5    4.51    1.08
   0  16  -5    3.14    1.28
   0  16  -5    5.50    1.67
   0 -16   4    5.69    4.12
   0 -16   4    1.67    3.34
   0  16  -4    1.47    3.24
   0  16  -4    3.14    4.12
   0 -16   4    4.81    1.96
   0 -16   4    3.04    0.98
   0  16  -4    5.40    1.47
   0  16  -4    7.07    1.77
   0 -16   3    7.26    3.83
   0 -16   3    6.97    3.24
   0  16  -3    3.53    3.63
   0  16  -3    0.98    4.12
   0 -16   3    5.50    2.45
   0 -16   3    6.87    1.18
   0  16  -3   10.89    1.77
   0  16  -3    8.05    1.57
   0 -16   2   -1.47    3.14
   0 -16   2    2.45    3.63
   0  16  -2    3.63    4.32
   0  16  -2    4.71    3.43
   0 -16   2    2.06    0.98
   0 -16   2    1.77    2.65
   0  16  -2    2.16    1.67
   0  16  -2    2.36    1.57
   0 -16   1    3.34    3.53
   0 -16   1    4.42    3.34
   0  16  -1    1.28    4.61
   0  16  -1    3.53    3.14
   0 -16   1   -3.24    2.65
   0 -16   1    1.67    0.98
   0  16  -1    1.96    1.67
   0  16  -1    1.67    1.67
   0 -16   0    5.59    3.73
   0 -16   0    7.46    3.53
   0  16   0   10.40    4.91
   0  16   0   -1.96    3.24
   0 -16   0    6.38    3.04
   0 -16   0    9.62    1.18
   0  16   0    9.32    1.77
   0 -16  -1    0.98    3.63
   0 -16  -1    1.86    3.73
   0  16   1    3.04    3.24
   0  16   1    3.93    4.81
   0 -16  -2    3.63    4.12
   0 -16  -2   -0.69    3.63
   0  16   2   -0.29    3.24
   0  16   2    2.06    5.20
   0 -16  -2   -1.28    3.14
   0 -16  -2    0.39    0.98
   0  16   2    0.49    1.67
   0  16   2    0.10    1.86
   0 -16  -3   -0.59    4.02
   0 -16  -3    0.00    3.63
   0  16   3   -3.43    3.24
   0  16   3   -2.55    4.71
   0 -16  -3    0.29    0.98
   0 -16  -3   -1.67    3.04
   0  16   3   -0.10    1.96
   0  16   3    3.83    1.47
   0 -16  -4    0.88    4.42
   0 -16  -4    8.73    3.63
   0  16   4    4.02    3.34
   0  16   4    2.85    4.91
   0 -16  -4    2.55    1.18
   0 -16  -4    6.08    3.14
   0  16   4    5.79    1.57
   0  16   4    0.49    1.96
   0 -16  -5   -0.10    3.93
   0 -16  -5    4.91    4.81
   0  16   5   -0.69    4.81
   0  16   5    7.75    3.53
   0 -16  -5   -1.37    2.94
   0 -16  -5   -0.49    1.08
   0  16   5   -1.77    1.96
   0  16   5   -1.18    1.47
   0 -16  -6   15.31    4.42
   0 -16  -6    2.45    5.20
   0  16   6   13.44    4.81
   0  16   6   13.93    4.02
   0  16   6   11.09    2.26
   0  16   6   12.17    1.77
   0 -16  -7    6.67    5.40
   0 -16  -7    2.36    4.22
   0  16   7   -0.79    3.83
   0  16   7   -0.79    4.51
   0 -16  -7    4.02    2.65
   0 -16  -7    0.10    1.18
   0  16   7   -0.98    1.47
   0  16   7   -1.37    2.06
   0 -16  -8    0.88    4.32
   0 -16  -8   -2.36    4.91
   0  16   8    8.44    4.22
   0  16   8    3.83    4.22
   0 -16  -8    6.18    1.37
   0 -16  -8    7.65    2.55
   0  16   8    6.38    1.67
   0 -16  -9    1.08    4.12
   0 -16  -9    4.91    4.51
   0  16   9    0.59    4.02
   0  16   9   -7.65    4.42
   0 -16  -9    1.96    1.28
   0 -16  -9    1.86    2.55
   0  16   9   -0.10    1.67
   0  16   9   -0.88    2.45
   0 -16 -10    0.00    4.02
   0 -16 -10    8.93    4.51
   0  16  10    8.14    4.22
   0  16  10    2.16    4.61
   0 -16 -10    2.65    1.37
   0 -16 -10    1.18    2.16
   0  16  10    1.28    1.67
   0  16  10    0.79    2.55
   0 -16 -11   -0.10    4.02
   0 -16 -11    2.45    4.42
   0  16  11    5.10    4.12
   0  16  11   -2.16    4.32
   0 -16 -11   -0.10    1.37
   0 -16 -11   -0.88    1.67
   0  16  11    1.18    2.75
   0  16  11   -0.98    1.57
   0 -16 -12   -0.10    4.22
   0 -16 -12   -3.83    4.32
   0  16  12   -5.69    3.63
   0  16  12   -1.57    4.71
   0 -16 -12    3.73    1.67
   0 -16 -12    0.59    1.37
   0  16  12    0.20    1.47
   0  16  12   -0.98    2.75
   0 -17   3   -2.85    3.04
   0 -17   3    2.45    3.73
   0  17  -3   -3.73    3.93
   0 -17   3    2.65    0.98
   0 -17   3    3.73    1.57
   0  17  -3    4.32    1.67
   0  17  -3    1.67    1.47
   0 -17   2    2.36    3.93
   0 -17   2    3.14    3.24
   0  17  -2    6.57    3.34
   0  17  -2    0.79    4.22
   0 -17   1    1.18    3.14
   0 -17   1    0.10    3.93
   0  17  -1   -0.10    4.32
   0  17  -1   -4.91    3.34
   0 -17   1    0.49    1.86
   0 -17   1    0.29    0.98
   0  17  -1   -1.67    1.47
   0 -17   0   -2.65    4.02
   0 -17   0   -2.75    3.14
   0  17   0   -1.57    4.71
   0  17   0   -3.24    3.63
   0 -17   0    1.18    1.77
   0 -17   0    0.10    0.98
   0  17   0    0.59    1.47
   0  17   0    2.65    1.67
   0 -17  -1   11.48    4.32
   0 -17  -1    9.91    3.73
   0  17   1   10.79    4.32
   0  17   1   -0.88    5.20
   0  17   1    8.73    1.96
   0  17   1   10.79    1.77
   0 -17  -2   -4.91    4.32
   0 -17  -2    0.69    3.63
   0  17   2    3.04    4.12
   0  17   2    7.46    5.59
   0 -17  -2    1.18    1.77
   0 -17  -2    4.71    1.08
   0  17   2    4.91    1.57
   0  17   2    1.77    1.96
   0 -17  -3    3.53    4.12
   0 -17  -3    3.73    3.83
   0  17   3   -2.75    4.12
   0  17   3    4.81    4.91
   0 -17  -3   10.40    1.28
   0 -17  -3    6.48    2.06
   0  17   3   12.07    2.26
   0  17   3   10.79    1.67
   0 -17  -4    1.86    3.63
   0 -17  -4    4.81    4.12
   0  17   4   -0.59    4.61
   0  17   4    1.77    3.73
   0 -17  -4    0.69    1.86
   0 -17  -4    0.49    1.08
   0  17   4   -1.08    2.06
   0  17   4    0.29    1.47
   0 -17  -5   -1.77    3.63
   0 -17  -5    0.00    4.22
   0  17   5    2.26    3.73
   0  17   5    2.65    4.32
   0 -17  -5   -1.37    1.08
   0 -17  -5   -0.20    1.77
   0  17   5    0.39    2.06
   0  17   5   -0.10    1.37
   0 -17  -6   -1.18    3.63
   0 -17  -6   -5.59    4.32
   0  17   6    2.55    4.12
   0  17   6    1.08    3.83
   0 -17  -6   -1.57    1.67
   0 -17  -6    0.20    1.18
   0  17   6    0.29    1.47
   0  17   6   -0.98    2.16
   0 -17  -7    0.39    4.61
   0 -17  -7    5.99    4.12
   0  17   7    1.08    4.02
   0  17   7    1.57    3.93
   0 -17  -7    3.34    1.28
   0 -17  -7   -0.10    1.77
   0  17   7    5.20    2.16
   0  17   7    2.36    1.47
   0 -17  -8    2.16    4.12
   0 -17  -8    2.55    4.22
   0  17   8    0.29    3.93
   0  17   8   -2.55    3.63
   0 -17  -8    0.10    1.77
   0 -17  -8    1.57    1.47
   0  17   8   -1.47    2.06
   0  17   8   -0.49    1.37
   0 -17  -9    7.65    4.42
   0 -17  -9    1.86    4.42
   0  17   9   -1.96    4.12
   0  17   9   -5.50    3.53
   0 -17  -9    2.85    1.37
   0 -17  -9   -0.20    1.67
   0  17   9    2.06    1.47
   0  17   9    0.10    2.16
   0 -17 -10   -1.57    1.57
   0 -17 -10    1.08    1.37
   0  17  10    0.49    2.26
   0  17  10   -0.39    1.57
  -1  17   9   -2.26    2.36
  -1  17   9    0.88    1.37
   1 -17  -9    0.69    1.47
   1 -17  -9    0.59    1.28
  -1  17   8    0.98    3.83
   1 -17  -8    0.69    4.71
  -1  17   8    2.26    1.28
  -1  17   8    2.06    2.16
   1 -17  -8   -0.98    1.57
   1 -17  -8    1.57    1.37
  -1  17   7    5.10    3.93
  -1  17   7   -3.63    3.93
   1 -17  -7   -2.16    4.51
   1 -17  -7    3.04    4.22
  -1  17   7    1.18    1.28
  -1  17   7    1.57    2.06
   1 -17  -7   -1.08    1.67
   1 -17  -7    1.86    1.28
  -1  17   6   -4.12    3.63
  -1  17   6    7.46    3.93
   1 -17  -6    2.06    3.93
   1 -17  -6    5.59    4.51
  -1  17   6    5.50    2.16
  -1  17   6    1.37    1.37
   1 -17  -6    3.63    1.28
   1 -17  -6    2.45    1.57
  -1  17   5   -0.20    3.83
  -1  17   5   -2.16    3.63
   1 -17  -5   -0.69    4.42
   1 -17  -5   -2.94    3.73
  -1  17   5    3.63    1.37
  -1  17   5    2.75    2.06
   1 -17  -5    4.51    1.18
   1 -17  -5    1.96    1.57
  -1  17   4    3.53    3.53
  -1  17   4   -1.86    3.73
   1 -17  -4    0.69    3.73
   1 -17  -4   -0.20    4.22
  -1  17   4    3.63    2.06
  -1  17   4    0.59    1.37
   1 -17  -4   -0.29    1.57
   1 -17  -4    0.59    1.08
  -1  17   3    1.86    3.73
  -1  17   3   -0.79    3.43
   1 -17  -3    4.02    4.02
   1 -17  -3    3.53    3.63
  -1  17   3    0.49    1.37
  -1  17   3    1.37    1.77
   1 -17  -3    2.36    1.08
   1 -17  -3   -0.20    1.57
  -1  17   2   -1.28    3.24
  -1  17   2   -4.12    4.12
   1 -17  -2   -4.51    3.63
   1 -17  -2   -5.79    4.22
  -1  17   2    1.08    1.57
  -1  17   2   -1.18    1.37
   1 -17  -2    0.20    1.57
   1 -17  -2    0.59    0.98
  -1  17   1    1.47    4.02
  -1  17   1    1.47    3.24
   1 -17  -1   -0.59    3.93
   1 -17  -1    1.18    3.43
  -1  17   1    3.83    1.47
  -1  17   1    3.24    1.67
   1 -17  -1    3.53    0.98
   1 -17  -1    2.55    1.57
  -1  17   0   -3.63    3.14
  -1  17   0    5.10    4.12
   1 -17   0   -1.37    3.24
   1 -17   0   -0.88    3.73
  -1  17   0   -0.10    1.57
  -1  17   0    0.10    1.37
   1 -17   0    1.57    0.98
   1 -17   0    1.18    1.57
  -1  17  -1   -6.38    4.12
   1 -17   1    7.16    3.83
  -1  17  -1    5.30    1.67
  -1  17  -1    5.20    1.57
   1 -17   1    3.14    0.98
   1 -17   1    2.65    1.57
  -1  16  11   -2.55    3.83
  -1  16  11   -5.79    4.12
   1 -16 -11    9.32    4.42
   1 -16 -11   -0.59    4.12
  -1  16  11   -0.29    2.36
  -1  16  11    3.04    1.47
   1 -16 -11    0.69    1.67
   1 -16 -11    3.04    1.37
  -1  16  10   -3.34    4.02
  -1  16  10   -5.40    4.22
   1 -16 -10    1.28    4.22
   1 -16 -10    0.69    4.12
  -1  16  10   -1.28    2.26
  -1  16  10    1.47    1.47
   1 -16 -10   -1.86    1.28
   1 -16 -10    0.98    1.57
  -1  16   9    5.30    4.32
  -1  16   9   -1.37    4.12
   1 -16  -9   -2.26    4.02
   1 -16  -9    0.39    4.12
  -1  16   9    0.98    2.16
  -1  16   9    2.55    1.47
   1 -16  -9    0.88    1.86
   1 -16  -9   -0.69    1.28
  -1  16   8    4.12    4.02
  -1  16   8   -1.18    4.22
   1 -16  -8   -3.83    4.32
   1 -16  -8    2.36    3.93
  -1  16   8    2.16    2.26
   1 -16  -8   -2.36    2.16
   1 -16  -8   -1.47    1.18
  -1  16   7    7.07    4.12
  -1  16   7    2.45    4.22
   1 -16  -7   -1.08    4.12
   1 -16  -7   -3.04    4.91
  -1  16   7    1.77    1.37
  -1  16   7    2.55    1.96
   1 -16  -7    1.08    1.18
   1 -16  -7    1.67    2.36
  -1  16   6    2.26    4.32
  -1  16   6    2.06    3.83
   1 -16  -6    8.34    5.20
   1 -16  -6    6.18    4.32
  -1  16   6    5.10    1.37
  -1  16   6    5.79    2.06
   1 -16  -6    5.50    1.47
  -1  16   5    2.55    4.51
  -1  16   5   -1.08    3.43
   1 -16  -5   -1.08    4.91
   1 -16  -5    0.69    3.83
  -1  16   5    0.39    1.37
  -1  16   5   -0.98    1.96
   1 -16  -5    0.98    2.45
   1 -16  -5   -1.57    1.08
  -1  16   4    2.26    3.43
  -1  16   4    5.69    4.61
   1 -16  -4    4.42    4.71
   1 -16  -4    1.77    4.02
  -1  16   4    8.34    2.06
  -1  16   4    6.67    1.47
   1 -16  -4    7.16    1.28
   1 -16  -4    4.91    2.65
  -1  16   3   -2.55    4.61
  -1  16   3    6.87    3.43
   1 -16  -3   -3.93    3.83
   1 -16  -3    5.89    4.22
  -1  16   3   -1.28    1.37
  -1  16   3    1.86    1.96
   1 -16  -3   -1.28    2.55
   1 -16  -3   -0.69    1.08
  -1  16   2    4.12    3.53
  -1  16   2    6.28    5.20
   1 -16  -2   12.76    4.12
   1 -16  -2    0.49    4.42
  -1  16   2   10.70    2.06
  -1  16   2   13.25    1.77
   1 -16  -2    8.83    2.75
   1 -16  -2    9.52    1.28
  -1  16   1   -0.88    4.71
  -1  16   1   -3.34    3.34
   1 -16  -1    2.94    4.02
   1 -16  -1    0.49    3.83
  -1  16   1   -0.29    1.77
  -1  16   1    1.08    1.57
   1 -16  -1    1.77    0.98
   1 -16  -1   -0.88    2.55
  -1  16   0   -3.63    4.42
  -1  16   0   -2.75    3.34
   1 -16   0    4.02    3.63
   1 -16   0    2.85    3.83
  -1  16   0    0.98    1.67
  -1  16   0   -1.47    1.57
   1 -16   0    4.61    2.65
   1 -16   0   -0.20    0.98
  -1  16  -1    3.43    4.32
  -1  16  -1   -1.37    3.63
   1 -16   1   -2.85    3.73
   1 -16   1    3.34    3.43
  -1  16  -1    2.65    1.67
  -1  16  -2    5.00    3.73
  -1  16  -2   -0.79    4.42
   1 -16   2    0.00    3.43
   1 -16   2    7.16    3.83
  -1  16  -2    2.45    1.47
   1 -16   2    2.26    2.26
  -1  16  -3   -0.39    4.32
  -1  16  -3   -2.94    3.43
   1 -16   3    2.65    3.14
   1 -16   3   -1.86    3.53
  -1  16  -3    1.86    1.47
  -1  16  -3    1.57    1.37
   1 -16   3   -1.37    1.86
   1 -16   3   -0.59    0.98
  -1  16  -4    8.73    3.93
  -1  16  -4    2.65    3.24
   1 -16   4    2.45    3.04
   1 -16   4   -2.85    3.14
  -1  16  -4    4.61    1.57
  -1  16  -4    3.43    1.37
   1 -16   4    2.06    0.98
   1 -16   4    2.26    1.86
  -1  16  -5    1.37    3.73
   1 -16   5   -0.69    3.04
   1 -16   5    0.20    1.67
   1 -16   5    0.88    1.08
  -1  15  14   -2.36    3.73
   1 -15 -14   -0.59    4.61
  -1  15  13    1.77    4.51
  -1  15  13    0.39    3.73
   1 -15 -13   -1.86    4.22
   1 -15 -13   -0.49    4.22
  -1  15  13    0.49    1.47
  -1  15  13    4.02    2.36
   1 -15 -13    0.59    1.47
   1 -15 -13   -2.16    1.67
  -1  15  12   10.40    5.00
  -1  15  12   -0.29    4.32
   1 -15 -12   -0.69    4.42
   1 -15 -12   -1.57    4.71
  -1  15  12    1.77    1.47
  -1  15  12   -0.59    2.55
   1 -15 -12    1.96    1.96
   1 -15 -12    0.59    1.47
  -1  15  11    0.00    4.32
  -1  15  11    5.10    4.81
   1 -15 -11    0.79    4.81
   1 -15 -11   -0.10    4.32
  -1  15  11    2.94    1.57
  -1  15  11   -0.69    2.55
   1 -15 -11    0.10    2.65
   1 -15 -11    0.69    1.37
  -1  15  10    3.14    4.22
  -1  15  10    1.47    4.42
   1 -15 -10    0.20    5.50
   1 -15 -10    5.59    4.42
  -1  15  10    6.87    1.67
  -1  15  10    6.38    2.45
   1 -15 -10    3.34    2.65
   1 -15 -10    7.07    1.47
  -1  15   9   -3.14    4.02
  -1  15   9   -0.79    4.02
   1 -15  -9    3.63    4.22
   1 -15  -9    1.67    5.69
  -1  15   9    0.29    1.47
  -1  15   9    0.00    2.26
   1 -15  -9    1.96    2.75
   1 -15  -9   -0.49    1.28
  -1  15   8    4.91    4.42
  -1  15   8   -0.20    3.73
   1 -15  -8   -6.08    4.02
   1 -15  -8    7.46    5.50
  -1  15   8   -0.88    1.47
  -1  15   8   -1.47    2.16
   1 -15  -8    0.88    2.85
   1 -15  -8   -0.59    1.28
  -1  15   7   -0.79    3.43
  -1  15   7    5.40    5.00
   1 -15  -7   -3.73    5.50
   1 -15  -7   -1.37    3.83
  -1  15   7    1.67    1.57
  -1  15   7    2.06    2.16
   1 -15  -7    0.79    3.04
   1 -15  -7    2.26    1.28
  -1  15   6    3.04    3.34
  -1  15   6    9.71    5.20
   1 -15  -6   -1.08    5.30
   1 -15  -6    5.50    3.93
  -1  15   6    5.30    1.47
  -1  15   6    7.95    2.16
   1 -15  -6   12.76    3.24
   1 -15  -6    6.18    1.37
  -1  15   5   -4.02    4.91
  -1  15   5    2.36    3.14
   1 -15  -5    1.67    5.10
   1 -15  -5   -2.65    3.63
  -1  15   5    0.98    1.37
  -1  15   5    0.20    1.96
   1 -15  -5    0.88    2.94
   1 -15  -5    0.29    1.37
  -1  15   4    1.67    3.04
  -1  15   4    7.75    4.71
   1 -15  -4    2.45    3.63
   1 -15  -4    7.16    4.81
  -1  15   4   10.01    1.67
  -1  15   4   10.30    2.26
   1 -15  -4   15.11    3.34
   1 -15  -4   11.38    1.47
  -1  15   3    0.49    2.94
  -1  15   3   -0.88    4.91
   1 -15  -3    4.91    4.81
   1 -15  -3    4.22    3.43
  -1  15   3   -2.36    1.57
  -1  15   3   -1.67    2.06
   1 -15  -3   -2.36    3.14
   1 -15  -3    1.18    1.18
  -1  15   2   11.09    4.71
  -1  15   2   11.97    3.34
   1 -15  -2   14.72    3.83
   1 -15  -2   15.41    4.71
  -1  15   1   -1.77    4.32
  -1  15   1    2.45    3.04
   1 -15  -1    5.00    3.53
   1 -15  -1    9.03    4.22
  -1  15   1    3.83    1.67
   1 -15  -1    2.16    1.08
   1 -15  -1   -2.26    3.14
  -1  15   0   -1.28    3.14
  -1  15   0    5.69    4.12
   1 -15   0   -0.29    3.93
   1 -15   0    2.85    3.34
  -1  15   0   -0.49    1.57
  -1  15   0    0.88    1.67
   1 -15   0    2.45    0.98
   1 -15   0   -0.10    3.04
  -1  15  -1    1.57    3.04
  -1  15  -1   -0.88    4.22
   1 -15   1    2.55    3.73
   1 -15   1    3.24    3.34
  -1  15  -1    0.29    1.67
  -1  15  -1    3.63    1.67
   1 -15   1    2.75    1.08
   1 -15   1    3.14    3.04
  -1  15  -2    1.67    3.04
  -1  15  -2    1.77    4.12
   1 -15   2    0.10    3.43
   1 -15   2    2.55    3.34
  -1  15  -2    3.73    1.67
  -1  15  -2    3.24    1.57
   1 -15   2    0.39    0.98
   1 -15   2    0.39    3.04
  -1  15  -3    0.49    2.85
  -1  15  -3    0.59    3.93
   1 -15   3   -0.20    3.34
   1 -15   3   -3.83    3.14
  -1  15  -3   -0.29    1.47
  -1  15  -3    0.49    1.57
   1 -15   3    0.59    0.98
   1 -15   3    1.18    2.94
  -1  15  -4    1.77    3.53
  -1  15  -4   -1.37    3.04
   1 -15   4    5.40    3.24
   1 -15   4    4.12    2.94
  -1  15  -4    2.26    1.57
  -1  15  -4    2.36    1.37
   1 -15   4    1.37    0.98
   1 -15   4    2.16    2.75
  -1  15  -5    1.67    3.34
  -1  15  -5    3.24    3.43
   1 -15   5    0.20    3.43
   1 -15   5   -2.45    3.14
  -1  15  -5   -1.96    1.57
  -1  15  -5    0.20    1.28
   1 -15   5    0.79    1.08
   1 -15   5    0.88    2.55
  -1  15  -6   -1.77    3.24
  -1  15  -6   -1.86    3.53
   1 -15   6    0.29    3.14
   1 -15   6    4.32    3.34
  -1  15  -6    1.08    1.47
  -1  15  -6    0.29    1.18
   1 -15   6    2.45    1.18
   1 -15   6    1.77    1.96
  -1  15  -7    1.37    3.63
  -1  15  -7    1.67    3.04
   1 -15   7    3.83    3.24
   1 -15   7    1.77    2.94
  -1  15  -7    1.57    1.08
  -1  15  -7    1.28    1.47
   1 -15   7    0.59    1.18
   1 -15   7   -0.39    1.86
  -1  14  15    4.02    4.51
  -1  14  15    6.77    3.53
   1 -14 -15    1.86    4.51
   1 -14 -15    2.26    4.61
  -1  14  15    1.86    1.57
  -1  14  15    1.37    2.45
   1 -14 -15   -0.88    1.47
   1 -14 -15    2.45    1.67
  -1  14  14   -3.83    4.12
  -1  14  14   -4.32    4.81
   1 -14 -14   -4.02    4.81
   1 -14 -14   -6.28    4.71
  -1  14  14   -0.49    2.45
  -1  14  14   -1.18    1.47
   1 -14 -14    1.86    1.47
   1 -14 -14   -0.49    1.77
  -1  14  13    1.37    4.22
  -1  14  13   -3.93    4.71
   1 -14 -13    2.94    4.81
   1 -14 -13   -3.24    4.71
  -1  14  13    1.67    1.57
  -1  14  13    3.73    2.65
   1 -14 -13    0.98    1.37
   1 -14 -13    1.96    2.65
  -1  14  12    1.47    4.22
  -1  14  12   -4.51    4.51
   1 -14 -12    5.30    5.00
   1 -14 -12   -0.29    5.40
  -1  14  12   -0.10    1.57
  -1  14  12    1.86    2.55
   1 -14 -12   -0.20    1.37
   1 -14 -12   -6.38    2.65
  -1  14  11    5.30    4.22
  -1  14  11   11.38    4.71
   1 -14 -11   -0.79    4.61
   1 -14 -11    3.73    5.69
  -1  14  11    1.57    1.57
  -1  14  11    1.57    2.65
   1 -14 -11    3.34    1.47
   1 -14 -11   -4.42    2.94
  -1  14  10    7.56    4.51
  -1  14  10   -1.28    4.42
   1 -14 -10    1.28    5.50
   1 -14 -10   -0.98    4.32
  -1  14  10    3.14    1.57
  -1  14  10    3.24    2.65
   1 -14 -10   -0.59    1.37
   1 -14 -10    1.96    3.04
  -1  14   9    2.06    3.73
  -1  14   9    1.37    4.22
   1 -14  -9    2.85    5.40
   1 -14  -9    3.53    3.83
  -1  14   9    5.99    2.65
  -1  14   9    6.48    1.67
   1 -14  -9    3.83    1.47
   1 -14  -9    6.28    3.14
  -1  14   8    2.55    3.73
  -1  14   8    1.47    3.43
   1 -14  -8   -2.65    3.34
   1 -14  -8   -2.94    5.10
  -1  14   8    1.18    1.57
  -1  14   8   -3.93    2.45
   1 -14  -8    1.67    1.37
   1 -14  -8    2.06    3.14
  -1  14   7   10.99    3.43
  -1  14   7   15.99    4.02
   1 -14  -7    7.07    3.53
   1 -14  -7   22.86    5.59
  -1  14   7   14.52    1.96
  -1  14   7   11.97    2.65
   1 -14  -7   10.50    1.57
   1 -14  -7   12.66    3.34
  -1  14   6   -0.20    3.24
  -1  14   6    1.08    3.83
   1 -14  -6   -2.06    3.24
   1 -14  -6    0.20    5.20
  -1  14   6   -0.69    2.26
  -1  14   6    0.79    1.67
   1 -14  -6   -3.14    3.14
   1 -14  -6    0.79    1.37
  -1  14   5    7.46    3.73
  -1  14   5    4.51    3.04
   1 -14  -5    3.14    4.91
   1 -14  -5    4.02    3.34
  -1  14   5    6.08    2.36
   1 -14  -5    5.69    1.67
  -1  14   4    0.88    2.85
  -1  14   4    1.77    3.73
   1 -14  -4    7.65    4.32
   1 -14  -4   -3.93    3.04
  -1  14   4    4.12    1.86
   1 -14  -4    3.14    3.34
  -1  14   3    2.45    2.75
  -1  14   3    5.40    3.83
   1 -14  -3   -6.67    4.22
   1 -14  -3    0.88    3.04
  -1  14   3   -1.96    2.06
  -1  14   3    1.18    1.67
   1 -14  -3    0.29    1.18
   1 -14  -3   -4.81    3.24
  -1  14   2    2.36    2.65
  -1  14   2    4.51    3.53
   1 -14  -2    4.42    3.73
   1 -14  -2   -0.49    2.85
  -1  14   2   -0.59    1.67
  -1  14   2    0.49    2.06
   1 -14  -2    1.77    1.18
   1 -14  -2   -0.98    3.14
  -1  14   1    5.50    3.53
  -1  14   1    3.53    2.65
   1 -14  -1    5.79    2.94
   1 -14  -1    4.42    3.63
  -1  14   1    9.42    1.86
  -1  14   1    3.53    1.96
   1 -14  -1    9.81    1.28
   1 -14  -1    9.42    3.24
  -1  14   0   -2.36    3.43
  -1  14   0    1.67    2.65
   1 -14   0    2.55    2.94
   1 -14   0   -2.85    3.43
  -1  14   0   -1.37    1.67
  -1  14   0    1.28    1.77
   1 -14   0   -1.08    1.08
   1 -14   0    2.26    3.04
  -1  14  -1    5.69    2.65
  -1  14  -1    4.81    3.43
   1 -14   1    6.77    3.34
   1 -14   1    2.26    2.85
  -1  14  -1   10.89    1.86
  -1  14  -1    6.48    1.77
   1 -14   1    8.54    1.28
   1 -14   1    8.83    3.04
  -1  14  -2    7.56    3.24
  -1  14  -2    6.67    2.75
   1 -14   2    9.03    3.14
   1 -14   2   10.11    3.14
  -1  14  -2    8.54    1.77
  -1  14  -2    8.14    1.67
   1 -14   2    8.64    1.28
   1 -14   2   12.17    3.14
  -1  14  -3   -2.75    2.65
  -1  14  -3    4.32    3.04
   1 -14   3   -5.30    2.65
   1 -14   3   -1.67    3.14
  -1  14  -3    0.49    1.67
  -1  14  -3    4.81    1.47
   1 -14   3    0.79    1.08
   1 -14   3   -3.63    2.85
  -1  14  -4    5.10    2.75
  -1  14  -4    8.14    3.14
   1 -14   4    6.87    3.24
   1 -14   4    4.12    2.55
  -1  14  -4    1.67    1.37
  -1  14  -4    4.22    1.67
   1 -14   4    4.91    1.08
   1 -14   4    3.34    3.04
  -1  14  -5    0.59    3.14
  -1  14  -5   -1.77    2.65
   1 -14   5   -3.43    2.45
   1 -14   5   -2.36    3.24
  -1  14  -5   -3.43    1.67
  -1  14  -5   -0.79    1.18
   1 -14   5   -0.10    1.08
   1 -14   5   -0.20    3.04
  -1  14  -6   -0.39    2.85
  -1  14  -6    0.39    3.24
   1 -14   6    3.24    3.34
   1 -14   6    1.47    2.55
  -1  14  -6   -0.39    1.57
  -1  14  -6    2.36    1.18
   1 -14   6    0.88    1.18
   1 -14   6    5.00    2.75
  -1  14  -7   -0.49    3.04
  -1  14  -7    3.34    3.24
   1 -14   7    1.08    2.75
   1 -14   7    8.93    3.43
  -1  14  -7   -0.79    1.47
  -1  14  -7    1.18    1.08
   1 -14   7    0.79    1.08
   1 -14   7   -0.98    2.65
  -1  14  -8   -1.67    3.24
  -1  14  -8   -7.46    3.14
   1 -14   8   -2.55    3.53
   1 -14   8    2.55    3.04
  -1  14  -8    3.04    1.08
  -1  14  -8    0.20    1.37
   1 -14   8    2.45    1.08
   1 -14   8   -0.39    2.06
  -1  14  -9   -3.24    3.24
  -1  14  -9   -0.98    2.85
   1 -14   9    2.65    3.14
   1 -14   9   -0.79    2.85
  -1  14  -9    0.69    0.98
  -1  14  -9    0.10    1.28
   1 -14   9    1.86    1.96
   1 -14   9   -0.39    1.47
  -1  13  17    2.94    3.63
   1 -13 -17    0.20    4.32
  -1  13  16   -2.26    4.71
  -1  13  16    3.24    3.63
   1 -13 -16    0.69    4.51
   1 -13 -16   -0.59    4.81
  -1  13  16    0.59    1.67
  -1  13  16   -0.59    2.55
   1 -13 -16    2.65    1.67
   1 -13 -16    2.26    1.77
  -1  13  15   -5.50    5.00
  -1  13  15    3.34    4.02
   1 -13 -15    2.85    4.71
   1 -13 -15    5.00    5.30
  -1  13  15   -1.57    1.67
  -1  13  15    0.59    2.75
   1 -13 -15    4.02    1.57
   1 -13 -15    2.16    2.45
  -1  13  14    0.59    3.93
  -1  13  14   11.38    4.91
   1 -13 -14   11.48    5.40
   1 -13 -14    6.48    4.61
  -1  13  14    1.86    2.65
  -1  13  14    2.65    1.67
   1 -13 -14    1.28    1.47
   1 -13 -14    4.91    2.65
  -1  13  13    5.00    3.73
  -1  13  13    3.04    4.91
   1 -13 -13   -0.79    5.00
   1 -13 -13    5.79    5.10
  -1  13  13    0.29    2.75
  -1  13  13    3.83    1.57
   1 -13 -13    3.93    2.85
   1 -13 -13    0.29    1.47
  -1  13  12    4.32    4.81
  -1  13  12   -2.85    3.83
   1 -13 -12   -6.28    5.40
   1 -13 -12    6.38    4.61
  -1  13  12    2.94    1.77
  -1  13  12    5.10    2.85
   1 -13 -12    1.57    1.47
   1 -13 -12    0.49    2.94
  -1  13  11    3.04    3.53
  -1  13  11    6.77    4.22
   1 -13 -11    5.00    5.50
   1 -13 -11    6.67    4.12
  -1  13  11    1.86    3.04
  -1  13  11    4.32    1.77
   1 -13 -11    4.02    3.14
   1 -13 -11    2.45    1.57
  -1  13  10   23.84    4.22
  -1  13  10   11.19    3.73
   1 -13 -10   17.37    5.59
   1 -13 -10   30.62    4.22
  -1  13  10   14.23    3.24
  -1  13  10   19.72    2.06
   1 -13 -10   19.33    1.96
   1 -13 -10   20.12    3.73
  -1  13   9    0.20    3.63
  -1  13   9    8.05    3.53
   1 -13  -9    7.36    5.20
   1 -13  -9    7.56    3.53
  -1  13   9    9.42    1.86
  -1  13   9    5.50    2.94
   1 -13  -9    2.65    3.63
   1 -13  -9    6.48    1.67
  -1  13   8   -1.86    3.43
  -1  13   8    3.93    3.14
   1 -13  -8    0.69    3.04
   1 -13  -8    6.08    5.10
  -1  13   8    0.39    2.75
  -1  13   8   -0.10    1.67
   1 -13  -8    1.08    1.57
   1 -13  -8    9.52    3.63
  -1  13   7    0.49    3.04
  -1  13   7   -0.59    3.73
   1 -13  -7   -7.85    5.30
   1 -13  -7    2.55    3.04
  -1  13   6   11.48    3.34
   1 -13  -6   10.50    3.43
   1 -13  -6   21.59    4.02
   1 -13  -6   13.64    1.77
  -1  13   5    4.71    1.77
  -1  13   5    1.67    2.16
   1 -13  -5    3.34    1.37
   1 -13  -5   12.76    3.73
  -1  13   4    7.65    1.86
   1 -13  -4   10.79    3.63
   1 -13  -4    8.44    1.37
  -1  13   3   -0.49    1.67
  -1  13   3    0.69    1.96
   1 -13  -3   -0.20    1.18
   1 -13  -3    1.57    3.24
  -1  13   2    8.83    1.86
  -1  13   2    6.28    2.06
   1 -13  -2    5.20    1.37
  -1  13   1   18.84    2.36
  -1  13   1   18.84    2.06
   1 -13  -1   23.16    3.63
   1 -13  -1   19.04    1.67
  -1  13   0    3.53    2.65
   1 -13   0    3.63    3.04
  -1  13   0    3.63    1.86
  -1  13   0    5.59    1.77
   1 -13   0    4.42    1.18
   1 -13   0    6.77    3.34
  -1  13  -1   20.12    3.93
   1 -13   1   22.86    3.24
   1 -13   1   28.55    3.63
  -1  13  -1   36.50    2.65
  -1  13  -1   34.93    2.55
   1 -13   1   35.33    2.06
   1 -13   1   41.80    4.02
  -1  13  -2    2.45    2.75
  -1  13  -2   -1.86    2.36
   1 -13   2   -0.69    2.75
   1 -13   2   -5.30    2.45
  -1  13  -2    0.20    1.57
  -1  13  -2   -1.18    1.67
   1 -13   2   -1.28    1.08
   1 -13   2   -2.65    2.94
   1 -13   3    0.98    2.85
   1 -13   3   -1.96    2.36
  -1  13  -3   -0.79    1.57
  -1  13  -3   -0.39    1.47
   1 -13   3   -3.24    2.85
   1 -13   3   -0.69    1.08
  -1  13  -4    3.04    2.65
  -1  13  -4    0.20    2.36
   1 -13   4    4.91    3.04
   1 -13   4    8.93    2.45
  -1  13  -4    4.51    1.57
  -1  13  -4    3.43    1.67
   1 -13   4    3.73    2.85
   1 -13   4    5.50    1.08
  -1  13  -5   30.81    3.04
  -1  13  -5   34.25    3.34
  -1  13  -5   40.72    2.65
  -1  13  -5   37.09    2.36
   1 -13   5   36.99    2.16
   1 -13   5   34.34    3.63
  -1  13  -6    4.42    2.55
  -1  13  -6    5.00    2.85
   1 -13   6    2.55    2.26
   1 -13   6    0.29    3.24
  -1  13  -6    1.86    1.28
  -1  13  -6    2.85    1.67
   1 -13   6    3.34    2.94
   1 -13   6    7.36    1.37
  -1  13  -7   37.19    3.53
  -1  13  -7   41.90    3.83
   1 -13   7   37.78    4.12
   1 -13   7   41.70    3.04
  -1  13  -7   40.43    2.26
  -1  13  -7   43.76    2.65
   1 -13   7   44.06    3.73
   1 -13   7   44.94    2.45
  -1  13  -8   15.80    3.34
  -1  13  -8   13.25    3.14
   1 -13   8   13.84    2.55
   1 -13   8    9.62    3.43
  -1  13  -8   13.84    1.47
  -1  13  -8   15.50    1.77
   1 -13   8   14.13    1.37
   1 -13   8   17.27    2.94
  -1  13  -9    5.30    3.04
  -1  13  -9    1.57    2.75
   1 -13   9   -0.98    2.55
   1 -13   9    0.79    3.43
  -1  13  -9    1.08    0.98
  -1  13  -9    0.79    1.37
   1 -13   9   -0.10    2.45
   1 -13   9   -0.69    1.37
  -1  13 -10   -2.06    3.04
  -1  13 -10    1.57    2.94
   1 -13  10   -0.98    2.85
   1 -13  10    0.79    2.94
  -1  13 -10    1.08    0.88
  -1  13 -10    2.45    1.28
   1 -13  10    1.08    1.37
   1 -13  10    0.39    2.16
  -1  13 -11    2.36    2.94
  -1  13 -11   -1.67    3.24
   1 -13  11    3.24    2.65
   1 -13  11    0.69    2.45
   1 -13  11    0.00    1.96
   1 -13  11    1.37    1.57
  -1  12  18    1.18    3.93
   1 -12 -18    0.79    4.22
  -1  12  18    4.42    1.67
  -1  12  18    2.65    2.45
   1 -12 -18    1.37    1.57
   1 -12 -18    2.55    1.47
  -1  12  17   -0.10    4.42
  -1  12  17    0.69    4.02
   1 -12 -17    3.04    4.71
   1 -12 -17   -2.16    4.61
  -1  12  17   -0.20    2.45
  -1  12  17   -0.79    1.57
   1 -12 -17    2.36    1.67
   1 -12 -17   -0.29    1.77
  -1  12  16    0.59    4.02
  -1  12  16    3.04    4.51
   1 -12 -16    6.48    4.71
   1 -12 -16   -4.22    4.51
  -1  12  16    2.06    1.67
  -1  12  16    7.46    2.75
   1 -12 -16    3.63    2.75
   1 -12 -16    4.91    1.67
  -1  12  15   12.07    3.93
  -1  12  15   15.99    4.81
   1 -12 -15   20.51    5.20
   1 -12 -15   14.13    4.61
  -1  12  15   11.09    2.94
  -1  12  15   12.76    2.06
   1 -12 -15   10.30    3.04
   1 -12 -15   14.03    1.96
  -1  12  14    4.32    3.43
  -1  12  14    5.99    5.10
   1 -12 -14   15.70    5.30
   1 -12 -14    4.91    4.91
  -1  12  14    5.40    2.94
  -1  12  14    4.61    1.77
   1 -12 -14    6.48    1.67
   1 -12 -14    0.88    2.75
  -1  12  13    2.16    3.34
  -1  12  13    3.04    4.71
   1 -12 -13    0.00    4.51
   1 -12 -13   -3.73    5.00
  -1  12  13    0.98    1.77
  -1  12  13   -0.98    2.85
   1 -12 -13   -0.39    3.14
   1 -12 -13    1.57    1.57
  -1  12  12   -1.57    4.12
  -1  12  12   -2.55    3.24
   1 -12 -12   -0.59    5.10
   1 -12 -12   -1.96    3.93
  -1  12  12   -2.45    1.67
  -1  12  12   -0.20    3.04
   1 -12 -12    1.47    1.57
   1 -12 -12   -6.48    3.43
  -1  12  11    7.75    3.34
  -1  12  11    0.29    3.63
   1 -12 -11   10.11    5.40
   1 -12 -11   11.87    3.63
  -1  12  11    8.34    1.86
  -1  12  11   11.28    3.34
   1 -12 -11    8.05    1.77
   1 -12 -11   11.78    3.93
  -1  12  10    5.79    3.34
  -1  12  10    0.98    3.43
   1 -12 -10    5.10    5.30
   1 -12 -10    0.00    3.34
  -1  12  10    2.36    1.86
  -1  12  10    5.40    3.14
   1 -12 -10    0.98    1.67
   1 -12 -10    2.45    3.93
  -1  12   8    4.22    3.34
   1 -12  -8   -5.99    4.91
  -1  12   8    0.39    2.85
  -1  12   8    2.45    1.77
   1 -12  -8    3.34    1.57
   1 -12  -8   -0.88    3.73
  -1  12   7   21.88    3.83
  -1  12   7   17.17    3.34
   1 -12  -7   10.79    3.04
   1 -12  -7   19.63    5.50
  -1  12   7   16.49    2.06
  -1  12   7   14.92    2.94
   1 -12  -7   14.13    1.77
   1 -12  -7   13.05    3.63
  -1  12   6   13.84    3.43
  -1  12   6    9.22    3.14
   1 -12  -6    9.52    2.94
   1 -12  -6   16.58    5.10
  -1  12   6    9.71    1.86
  -1  12   6   16.98    2.65
   1 -12  -6    9.03    1.57
   1 -12  -6    8.14    3.34
  -1  12   5    3.83    2.85
  -1  12   5    5.00    3.24
   1 -12  -5    7.56    2.94
   1 -12  -5    4.51    4.42
  -1  12   5    4.71    1.67
  -1  12   5    5.10    2.26
   1 -12  -5    5.89    1.47
   1 -12  -5   11.28    3.43
  -1  12   4   50.44    3.83
  -1  12   4   49.46    4.12
   1 -12  -4   49.46    4.81
   1 -12  -4   52.69    4.02
  -1  12   4   43.67    3.14
  -1  12   4   47.69    2.85
   1 -12  -4   47.20    4.22
   1 -12  -4   44.35    2.55
  -1  12   3    5.79    2.75
  -1  12   3    8.64    3.43
   1 -12  -3    7.85    2.94
   1 -12  -3   15.50    4.12
   1 -12  -3   10.60    1.37
   1 -12  -3   10.99    3.24
  -1  12   2    4.12    3.04
  -1  12   2    0.10    2.45
   1 -12  -2   -2.75    2.55
   1 -12  -2    3.53    3.53
  -1  12   2   -0.20    1.57
  -1  12   2    3.34    1.96
   1 -12  -2   -0.39    1.08
   1 -12  -2    3.53    3.04
  -1  12   1   20.02    2.75
  -1  12   1   22.47    3.43
   1 -12  -1   20.02    3.04
   1 -12  -1   20.12    3.53
  -1  12   1   22.08    2.06
  -1  12   1   23.35    2.45
   1 -12  -1   17.27    3.53
  -1  12   0   26.49    2.85
  -1  12   0   24.63    3.34
   1 -12   0   24.53    3.04
   1 -12   0   19.92    3.43
  -1  12   0   20.90    2.26
  -1  12   0   18.74    1.96
   1 -12   0   24.04    3.43
   1 -12   0   20.80    1.67
  -1  12  -1    5.40    2.36
  -1  12  -1    0.98    2.85
   1 -12   1    2.16    2.45
   1 -12   1    7.65    3.14
  -1  12  -1    3.53    1.67
  -1  12  -1    9.03    1.67
   1 -12   1    5.50    1.18
   1 -12   1    7.65    2.94
  -1  12  -2   51.52    3.73
  -1  12  -2   45.82    3.34
  -1  12  -2   54.66    3.04
  -1  12  -2   48.77    2.94
   1 -12   2   55.24    2.75
   1 -12   2   53.87    4.12
  -1  12  -3    1.67    2.55
   1 -12   3   -5.30    2.45
  -1  12  -3    3.04    1.67
  -1  12  -3    1.77    1.47
   1 -12   3   -0.59    1.08
   1 -12   3    0.10    2.85
  -1  12  -4   16.58    1.77
  -1  12  -4   16.09    1.96
   1 -12   4   16.39    1.47
   1 -12   4   13.93    3.24
  -1  12  -5    3.53    2.65
  -1  12  -5    0.69    2.36
   1 -12   5    2.75    2.26
   1 -12   5    3.04    3.14
  -1  12  -5   -0.98    1.28
  -1  12  -5    2.06    1.57
   1 -12   5    0.49    1.18
   1 -12   5    7.07    2.85
  -1  12  -6    2.94    2.36
  -1  12  -6    2.36    2.65
   1 -12   6   -1.18    3.14
   1 -12   6   -0.98    2.26
  -1  12  -6    0.59    1.18
  -1  12  -6    1.77    1.57
   1 -12   6    1.96    1.28
   1 -12   6    3.73    2.65
  -1  12  -7   -1.77    2.36
  -1  12  -7   -0.88    2.36
   1 -12   7    0.88    3.24
   1 -12   7   -0.59    2.06
  -1  12  -7   -0.49    1.18
  -1  12  -7   -0.20    1.47
   1 -12   7    2.85    1.28
   1 -12   7   -1.37    2.65
  -1  12  -8   12.56    2.75
  -1  12  -8   13.25    2.75
   1 -12   8    7.85    2.16
   1 -12   8    5.30    3.43
  -1  12  -8   10.30    1.67
  -1  12  -8   10.99    1.37
   1 -12   8   11.87    1.37
   1 -12   8    8.73    2.75
  -1  12  -9    7.36    2.65
  -1  12  -9    8.24    2.94
   1 -12   9    8.64    2.16
   1 -12   9   13.93    3.53
  -1  12  -9   10.99    1.28
  -1  12  -9    8.64    1.57
   1 -12   9    8.54    2.55
   1 -12   9    9.52    1.67
   1 -12  10   13.05    2.36
   1 -12  10    5.40    2.94
  -1  12 -10    8.14    1.47
  -1  12 -10    8.83    1.18
   1 -12  10    8.44    1.47
   1 -12  10   11.78    2.36
  -1  12 -11    2.94    2.85
  -1  12 -11   -0.88    2.85
   1 -12  11   -2.36    2.75
   1 -12  11   -1.96    3.14
  -1  12 -11   -1.08    0.98
   1 -12  11   -0.20    1.86
   1 -12  11    2.26    1.47
  -1  12 -12   -0.69    3.24
  -1  12 -12   -1.28    2.85
   1 -12  12    3.24    2.65
   1 -12  12   -0.79    2.65
  -1  11  18   -2.65    4.02
  -1  11  18    1.67    4.61
   1 -11 -18    3.43    4.22
   1 -11 -18    4.02    4.42
  -1  11  18    1.96    2.55
  -1  11  18    3.04    1.77
   1 -11 -18   -2.36    1.77
  -1  11  17    0.10    3.83
  -1  11  17    5.10    4.51
   1 -11 -17    1.57    4.71
   1 -11 -17   -1.28    4.51
  -1  11  17    2.65    1.77
  -1  11  17    0.49    2.55
   1 -11 -17    2.06    1.57
   1 -11 -17   -2.45    2.85
  -1  11  16    3.14    3.53
  -1  11  16   -6.38    4.61
   1 -11 -16    0.10    4.71
   1 -11 -16   -1.08    4.61
  -1  11  16   -0.39    1.67
  -1  11  16    1.96    2.75
   1 -11 -16    1.67    1.57
   1 -11 -16   -1.86    2.85
  -1  11  15    5.69    3.24
  -1  11  15   10.60    4.81
   1 -11 -15    8.54    5.10
   1 -11 -15    5.20    4.42
  -1  11  15    8.44    3.04
  -1  11  15    6.48    1.96
   1 -11 -15    6.48    1.77
   1 -11 -15    4.22    3.04
  -1  11  14   23.06    4.71
  -1  11  14   15.90    3.24
  -1  11  14   13.74    3.24
  -1  11  14    6.97    2.06
  -1  11  13    3.24    4.02
  -1  11  13    0.20    2.94
   1 -11 -13   -1.67    3.73
   1 -11 -13   -1.67    5.00
  -1  11  13    5.00    3.04
  -1  11  13    2.55    1.96
   1 -11 -13    4.12    1.67
   1 -11 -13    1.67    4.22
  -1  11  12    9.13    3.93
  -1  11  12   13.54    3.34
   1 -11 -12   16.78    5.20
   1 -11 -12   14.92    3.93
  -1  11  12   11.48    2.16
  -1  11  12   15.60    3.43
   1 -11 -12   16.49    2.06
   1 -11 -12   11.87    4.42
  -1  11  10   20.70    3.34
  -1  11  10   20.12    3.83
   1 -11 -10   20.21    5.30
   1 -11 -10   28.16    3.83
   1 -11 -10   14.03    2.06
   1 -11 -10   14.23    4.22
  -1  11   9   15.50    3.24
  -1  11   9   22.47    3.63
   1 -11  -9   21.69    3.43
   1 -11  -9   21.39    5.00
  -1  11   9   24.34    3.53
  -1  11   9   20.41    2.16
   1 -11  -9   20.90    2.06
   1 -11  -9   21.10    3.93
  -1  11   8    6.08    2.94
  -1  11   8    2.16    3.24
   1 -11  -8    1.96    2.94
   1 -11  -8    4.02    4.51
  -1  11   8    8.93    2.85
  -1  11   8    4.61    1.77
   1 -11  -8    4.22    1.57
   1 -11  -8    7.46    3.43
  -1  11   7    0.10    3.04
  -1  11   7   -6.87    3.14
   1 -11  -7   -1.86    4.61
   1 -11  -7    0.10    2.75
  -1  11   7    1.18    1.57
  -1  11   7    2.45    2.75
   1 -11  -7    2.36    1.47
   1 -11  -7   -2.85    3.14
  -1  11   6   39.74    3.63
  -1  11   6   32.28    3.34
   1 -11  -6   38.17    3.34
   1 -11  -6   47.49    5.30
  -1  11   6   44.16    2.85
  -1  11   6   40.13    3.53
   1 -11  -6   42.98    2.65
   1 -11  -6   41.80    4.22
  -1  11   5   -1.08    2.65
  -1  11   5    2.36    2.94
   1 -11  -5   -0.88    2.55
   1 -11  -5   -4.61    4.22
  -1  11   5    1.47    2.16
  -1  11   5   -1.18    1.57
   1 -11  -5   -1.67    1.28
   1 -11  -5    4.32    3.24
  -1  11   4   94.89    5.00
  -1  11   4   92.83    5.00
   1 -11  -4   90.57    4.91
   1 -11  -4   87.14    5.59
  -1  11   4   81.84    4.51
  -1  11   4   91.75    4.32
   1 -11  -4   93.02    4.22
   1 -11  -4   97.54    5.79
  -1  11   3   95.67    4.91
  -1  11   3   81.05    4.71
   1 -11  -3   89.59    5.40
   1 -11  -3   97.44    5.20
  -1  11   3   89.10    4.22
  -1  11   3   82.03    4.42
   1 -11  -3   87.43    3.93
   1 -11  -3   91.85    5.50
  -1  11   2    6.18    2.85
  -1  11   2    0.10    2.36
   1 -11  -2    3.53    3.34
   1 -11  -2    4.42    2.55
  -1  11   2    4.22    1.77
  -1  11   2    4.42    1.96
   1 -11  -2    3.43    1.18
   1 -11  -2    2.36    2.94
  -1  11   1  130.70    5.89
  -1  11   1  125.80    5.89
   1 -11  -1  121.58    5.99
   1 -11  -1  132.96    6.18
  -1  11   1  126.29    5.79
  -1  11   1  131.68    5.69
   1 -11  -1  132.57    5.50
   1 -11  -1  122.85    6.38
  -1  11   0   10.99    2.75
  -1  11   0   15.21    2.45
   1 -11   0   17.17    3.04
   1 -11   0   10.50    2.65
  -1  11   0   10.11    1.96
  -1  11   0   12.95    1.77
   1 -11   0    8.64    1.28
   1 -11   0   16.58    3.04
  -1  11  -1   70.94    3.93
  -1  11  -1   65.65    3.83
   1 -11   1   72.32    4.02
   1 -11   1   73.69    4.32
  -1  11  -1   63.78    3.43
  -1  11  -1   72.12    3.53
   1 -11   1   67.41    3.14
   1 -11   1   65.55    4.42
  -1  11  -2   -0.20    2.06
  -1  11  -2    1.08    2.36
   1 -11   2   -2.26    2.26
   1 -11   2   -0.10    2.36
  -1  11  -2    1.77    1.57
  -1  11  -2    0.00    1.47
   1 -11   2   -1.18    1.08
   1 -11   2   -2.36    2.65
  -1  11  -3   23.94    2.85
  -1  11  -3   21.78    2.45
   1 -11   3   23.45    2.85
   1 -11   3   25.81    2.75
  -1  11  -3   23.94    1.96
  -1  11  -3   21.59    1.96
   1 -11   3   26.20    1.77
   1 -11   3   21.29    2.94
  -1  11  -4    4.32    2.06
  -1  11  -4    1.18    2.55
   1 -11   4    2.06    2.36
   1 -11   4    4.42    2.45
  -1  11  -4    3.53    1.47
  -1  11  -4    3.14    1.37
   1 -11   4    2.65    1.08
   1 -11   4    0.10    2.55
   1 -11   5  112.55    5.79
   1 -11   5  118.05    5.40
  -1  11  -5  118.44    5.10
  -1  11  -5  115.49    5.10
   1 -11   5  109.31    5.69
   1 -11   5  121.97    5.10
  -1  11  -6   17.56    2.75
   1 -11   6   15.70    2.55
  -1  11  -6   13.44    1.47
  -1  11  -6   14.72    1.86
   1 -11   6   15.60    1.57
   1 -11   6   12.36    2.94
  -1  11  -7   13.84    2.45
  -1  11  -7    9.13    1.77
  -1  11  -7   10.70    1.37
   1 -11   7   13.84    2.94
   1 -11   7   11.38    1.47
  -1  11  -8   26.40    2.85
  -1  11  -8   34.05    3.04
   1 -11   8   32.09    2.65
   1 -11   8   31.11    3.83
  -1  11  -8   28.16    1.77
   1 -11   8   25.22    1.77
   1 -11   8   20.90    3.14
  -1  11  -9   11.87    2.55
   1 -11   9    9.13    2.16
   1 -11   9    8.64    3.43
  -1  11  -9    7.07    1.18
  -1  11 -11    8.44    2.75
  -1  11 -11   12.95    3.24
   1 -11  11   10.70    2.26
   1 -11  11    9.13    3.04
  -1  11 -12   19.23    3.34
  -1  11 -12   22.08    3.43
  -1  11 -12   23.45    1.86
   1 -11  12   23.84    2.45
   1 -11  12   24.73    2.26
  -1  11 -13    0.98    3.04
  -1  11 -13    0.79    2.94
  -1  11 -13   -1.77    1.37
   1 -11  13    0.59    1.77
   1 -11  13    0.20    1.67
  -1  11 -14    3.93    3.14
  -1  11 -14    3.34    3.04
   1 -11  14   10.70    2.85
   1 -11  14    4.22    2.55
   1 -11  14    5.10    1.47
   1 -11  14    7.26    1.77
  -1  10  19    2.26    4.81
  -1  10  19    3.73    4.12
   1 -10 -19    0.98    4.02
   1 -10 -19   -4.22    3.73
  -1  10  19    5.00    1.86
  -1  10  19    5.00    2.45
   1 -10 -19    3.53    1.77
   1 -10 -19    6.18    1.57
  -1  10  18    4.32    4.51
  -1  10  18   -7.26    3.73
   1 -10 -18    0.98    4.51
   1 -10 -18   -2.36    4.42
  -1  10  18    1.96    1.77
  -1  10  18   -1.18    2.45
   1 -10 -18    0.69    2.45
   1 -10 -18    3.53    1.47
  -1  10  17    0.39    4.81
  -1  10  17   -1.77    3.24
   1 -10 -17    5.40    4.51
   1 -10 -17    0.29    4.61
  -1  10  17    1.28    1.77
  -1  10  17   -1.18    2.45
   1 -10 -17    0.10    1.57
  -1  10  16   -3.43    4.71
  -1  10  16    2.85    3.24
   1 -10 -16   -5.30    4.32
   1 -10 -16   -5.99    5.30
  -1  10  16   -1.37    1.77
  -1  10  16    0.69    2.75
   1 -10 -16    0.10    1.67
   1 -10 -16   -1.57    3.04
  -1  10  15   -0.88    4.71
  -1  10  15   -1.08    3.04
   1 -10 -15    4.42    4.12
   1 -10 -15    8.73    4.91
  -1  10  15    0.59    1.96
  -1  10  15   -0.59    2.94
   1 -10 -15    0.20    3.34
   1 -10 -15   -0.59    1.67
  -1  10  14   16.19    4.61
  -1  10  14   20.12    3.14
   1 -10 -14   15.31    5.00
   1 -10 -14   22.47    4.02
  -1  10  14   19.92    2.36
  -1  10  14   11.87    3.24
   1 -10 -14   15.50    4.61
   1 -10 -14   17.17    2.06
  -1  10  13   26.40    4.51
   1 -10 -13   24.63    4.02
   1 -10 -13   29.44    2.45
  -1  10  12    3.34    4.12
  -1  10  12    1.67    2.85
   1 -10 -12    4.91    4.81
   1 -10 -12    4.22    3.83
  -1  10  12    1.86    2.06
   1 -10 -12   -0.69    4.51
  -1  10  11   29.54    3.34
  -1  10  11   34.05    4.22
   1 -10 -11   34.25    3.73
   1 -10 -11   31.20    5.20
  -1  10  11   29.63    2.55
  -1  10  11   27.18    3.73
   1 -10 -11   33.17    2.45
   1 -10 -11   30.81    4.61
  -1  10  10    6.67    2.75
  -1  10  10   -0.39    3.53
   1 -10 -10    5.99    3.14
   1 -10 -10    5.89    4.81
  -1  10  10   -1.67    1.67
  -1  10  10    3.63    2.94
   1 -10 -10    2.85    1.57
   1 -10 -10    0.49    3.63
  -1  10   9   83.90    4.71
  -1  10   9   88.51    5.20
   1 -10  -9   86.74    4.91
   1 -10  -9   81.93    6.08
  -1  10   9   82.82    4.12
  -1  10   9   93.42    5.50
   1 -10  -9   87.53    4.22
   1 -10  -9   86.55    5.69
  -1  10   8   -0.29    2.75
  -1  10   8    1.18    3.04
   1 -10  -8    4.61    2.85
   1 -10  -8    7.65    4.51
  -1  10   8   -1.18    1.67
  -1  10   8    7.26    2.85
   1 -10  -8    1.18    3.34
   1 -10  -8    5.79    1.57
  -1  10   7    2.94    2.65
  -1  10   7    6.18    2.94
   1 -10  -7    6.97    2.85
   1 -10  -7    9.03    4.32
  -1  10   7    6.57    1.77
  -1  10   7   13.54    2.94
   1 -10  -7    8.93    1.67
   1 -10  -7   11.09    3.43
  -1  10   6   26.49    3.24
  -1  10   6   23.16    3.24
   1 -10  -6   22.77    3.04
   1 -10  -6   22.57    4.71
  -1  10   6   25.81    3.24
  -1  10   6   20.12    2.16
   1 -10  -6   25.91    3.73
   1 -10  -6   22.96    1.96
  -1  10   5   91.06    4.81
  -1  10   5   83.41    4.51
   1 -10  -5   82.13    4.42
   1 -10  -5   97.44    6.18
  -1  10   5   92.73    4.42
  -1  10   5   96.06    5.20
   1 -10  -5   98.91    4.51
   1 -10  -5   96.06    5.69
  -1  10   4   61.82    4.02
  -1  10   4   59.95    3.83
   1 -10  -4   59.76    3.83
   1 -10  -4   65.74    4.81
  -1  10   4   56.03    3.63
  -1  10   4   59.56    3.24
   1 -10  -4   61.82    3.14
   1 -10  -4   61.82    4.61
  -1  10   3   26.10    3.14
  -1  10   3   29.54    2.94
   1 -10  -3   31.20    3.14
   1 -10  -3   31.01    3.83
  -1  10   3   31.11    2.36
  -1  10   3   25.02    2.55
   1 -10  -3   30.03    3.73
   1 -10  -3   25.51    1.86
  -1  10   2    1.37    2.55
  -1  10   2    3.34    2.26
   1 -10  -2    2.26    2.45
   1 -10  -2    3.63    3.04
  -1  10   2    3.93    1.86
  -1  10   2    3.73    1.57
   1 -10  -2    0.79    1.08
   1 -10  -2    0.98    2.94
  -1  10   1    0.20    2.55
  -1  10   1    1.08    2.16
   1 -10  -1    0.20    2.36
   1 -10  -1    1.96    2.85
  -1  10   1   -0.98    1.47
  -1  10   1    0.98    1.86
   1 -10  -1    0.79    1.08
   1 -10  -1    1.18    2.85
  -1  10   0  207.34    8.34
  -1  10   0  232.17    9.03
   1 -10   0  226.38    9.03
   1 -10   0  221.08    8.93
  -1  10   0  231.77    9.22
  -1  10   0  245.02    9.91
   1 -10   0  223.73    8.83
   1 -10   0  224.61    9.71
  -1  10  -1   10.50    2.36
  -1  10  -1   17.17    2.36
   1 -10   1   17.07    2.55
   1 -10   1   12.46    2.36
  -1  10  -1   13.15    1.77
  -1  10  -1   14.92    1.67
   1 -10   1   12.95    1.28
   1 -10   1   17.17    2.94
  -1  10  -2  115.89    5.30
  -1  10  -2  113.04    5.10
   1 -10   2  109.70    5.30
   1 -10   2  114.61    5.20
  -1  10  -2  119.81    5.20
  -1  10  -2  117.65    5.00
   1 -10   2  116.08    5.79
   1 -10   2  128.35    5.30
  -1  10  -3   36.31    2.94
  -1  10  -3   34.25    2.65
   1 -10   3   34.54    3.04
   1 -10   3   39.45    2.94
  -1  10  -3   37.58    2.36
  -1  10  -3   32.48    2.16
   1 -10   3   42.98    3.43
   1 -10   3   35.62    1.96
  -1  10  -4   26.79    2.75
  -1  10  -4   25.91    2.36
   1 -10   4   23.45    2.75
   1 -10   4   26.10    2.65
  -1  10  -4   19.82    1.77
   1 -10   4   19.33    1.47
   1 -10   4   22.27    3.04
  -1  10  -5  112.45    5.20
  -1  10  -5   98.22    4.51
   1 -10   5  107.45    5.40
   1 -10   5  107.64    4.91
  -1  10  -5  111.57    4.81
  -1  10  -6   58.29    3.63
  -1  10  -6   50.83    3.14
   1 -10   6   56.52    3.93
   1 -10   6   59.66    3.43
  -1  10  -7   15.80    2.26
  -1  10  -7   18.45    2.65
   1 -10   7   18.94    2.45
   1 -10   7   19.53    3.14
  -1  10  -8   14.62    2.85
  -1  10  -8   15.99    1.77
   1 -10   8   14.23    2.94
  -1  10  -9   35.62    3.24
  -1  10  -9   27.77    2.55
   1 -10   9   38.96    2.85
   1 -10   9   38.66    3.53
  -1  10  -9   39.64    2.36
   1 -10   9   37.68    2.45
   1 -10   9   34.54    3.14
  -1  10 -10  175.74    7.46
  -1  10 -10  178.20    7.56
   1 -10  10  169.36    7.75
   1 -10  10  191.05    7.65
   1 -10  10  162.59    6.87
   1 -10  10  179.67    7.85
  -1  10 -11  104.50    5.30
  -1  10 -11  103.52    5.40
   1 -10  11  101.95    4.81
   1 -10  11   97.93    5.69
  -1  10 -11  107.45    4.51
  -1  10 -11  112.45    4.81
   1 -10  11   96.26    4.81
   1 -10  11  101.85    5.00
  -1  10 -12   -1.28    2.45
  -1  10 -12    3.04    2.85
   1 -10  12   -0.29    2.06
   1 -10  12    0.79    2.94
  -1  10 -12    0.20    1.08
  -1  10 -12    1.47    1.28
   1 -10  12    1.18    1.57
   1 -10  12   -0.69    2.26
   1 -10  13   45.43    3.24
   1 -10  13   54.17    4.51
  -1  10 -13   37.19    2.06
  -1  10 -13   40.62    2.55
   1 -10  13   39.84    2.45
   1 -10  13   41.21    3.04
  -1  10 -14   -0.29    3.14
  -1  10 -14   -0.88    2.85
   1 -10  14    2.16    2.65
   1 -10  14    0.98    3.43
  -1  10 -14    1.47    1.96
  -1  10 -14    0.59    0.98
   1 -10  14    0.59    1.37
   1 -10  14   -0.10    1.57
  -1  10 -15   -1.96    3.04
  -1  10 -15    2.55    2.85
   1 -10  15   -1.28    2.45
   1 -10  15    0.20    2.45
   1 -10  15   -1.08    1.28
   1 -10  15   -0.49    1.28
  -1   9  20    0.88    3.24
  -1   9  20   -6.18    4.02
   1  -9 -20   -0.88    3.63
  -1   9  20   -0.20    2.26
  -1   9  20   -1.47    1.77
   1  -9 -20    0.49    1.67
   1  -9 -20   -0.59    1.37
  -1   9  19   -5.89    4.22
  -1   9  19    4.61    3.83
   1  -9 -19    1.86    4.32
   1  -9 -19    3.34    3.93
   1  -9 -19    3.53    2.06
   1  -9 -19    8.93    1.77
  -1   9  18    6.38    4.81
  -1   9  18    0.10    3.14
   1  -9 -18   -0.49    4.42
   1  -9 -18    2.36    4.42
  -1   9  18    4.51    2.75
   1  -9 -18    2.75    1.47
   1  -9 -18    2.16    2.85
  -1   9  17    0.29    3.14
  -1   9  17    0.00    4.81
   1  -9 -17   -2.65    5.10
   1  -9 -17    2.94    4.42
  -1   9  17   -1.08    1.77
  -1   9  17   -0.59    2.75
   1  -9 -17   -4.51    2.85
   1  -9 -17    0.00    1.47
  -1   9  16    6.48    5.00
  -1   9  16    2.85    3.14
   1  -9 -16   11.87    4.51
   1  -9 -16    1.86    4.61
  -1   9  16    7.85    2.94
  -1   9  16   10.60    2.16
   1  -9 -16   10.70    3.63
   1  -9 -16    7.26    1.77
   1  -9 -15    2.55    3.93
   1  -9 -15    3.04    4.91
  -1   9  15    1.96    2.06
  -1   9  15   -2.26    3.04
   1  -9 -15   -2.85    4.61
   1  -9 -15   -1.57    1.67
  -1   9  14   12.46    5.40
   1  -9 -14   15.70    4.12
  -1   9  13    1.37    2.55
  -1   9  13   -3.53    4.22
   1  -9 -13    4.51    3.34
   1  -9 -13   -7.16    4.51
  -1   9  13   -1.37    2.06
  -1   9  13    2.65    3.14
   1  -9 -13    3.43    4.61
   1  -9 -13    0.49    1.67
  -1   9  12    3.73    3.93
  -1   9  12    6.48    2.65
   1  -9 -12    3.93    2.94
   1  -9 -12    5.10    4.61
  -1   9  12    5.50    1.96
  -1   9  12    6.77    3.04
   1  -9 -12    3.04    4.22
   1  -9 -12    2.36    1.67
  -1   9  11   -2.06    2.45
  -1   9  11   -1.67    3.53
   1  -9 -11    1.57    2.75
   1  -9 -11    1.37    4.32
  -1   9  11   -2.16    1.77
  -1   9  11   -4.02    2.85
   1  -9 -11    2.65    3.93
   1  -9 -11    1.86    1.57
  -1   9  10    2.45    3.24
  -1   9  10    3.24    2.55
   1  -9 -10    1.57    2.75
   1  -9 -10    8.44    4.51
  -1   9  10    2.65    1.77
  -1   9  10   -1.37    2.85
   1  -9 -10    5.79    3.73
   1  -9 -10    0.00    1.57
  -1   9   9    6.87    3.43
  -1   9   9    4.61    2.65
   1  -9  -9    6.67    2.94
   1  -9  -9   10.79    4.61
  -1   9   9    7.95    3.04
  -1   9   9    4.71    1.77
   1  -9  -9    5.20    3.63
   1  -9  -9    6.57    1.57
  -1   9   8  147.38    6.77
  -1   9   8  144.83    6.38
   1  -9  -8  149.64    6.67
   1  -9  -8  143.26    7.56
  -1   9   8  151.60    6.48
  -1   9   8  155.73    7.56
   1  -9  -8  157.39    6.57
   1  -9  -8  146.89    7.65
  -1   9   7    5.50    2.65
  -1   9   7    7.07    3.04
   1  -9  -7    6.08    4.22
   1  -9  -7    8.34    2.85
  -1   9   7    9.62    1.77
  -1   9   7    1.77    2.75
   1  -9  -7    7.85    3.34
   1  -9  -7   10.30    1.67
  -1   9   6   36.50    3.43
  -1   9   6   47.49    3.73
   1  -9  -6   40.82    4.91
   1  -9  -6   48.67    3.53
  -1   9   6   38.86    2.65
  -1   9   6   42.98    3.73
   1  -9  -6   47.30    4.32
   1  -9  -6   38.86    2.45
  -1   9   5   75.85    4.32
  -1   9   5   73.30    4.42
   1  -9  -5   70.65    4.02
   1  -9  -5   82.23    5.59
  -1   9   5   73.40    3.73
  -1   9   5   81.44    4.71
   1  -9  -5   73.30    5.00
   1  -9  -5   70.45    3.43
  -1   9   4  125.99    5.69
  -1   9   4  135.02    5.99
   1  -9  -4  130.61    6.48
   1  -9  -4  127.17    5.69
   1  -9  -4  136.98    6.97
   1  -9  -4  138.55    5.79
  -1   9   3   27.18    3.04
  -1   9   3   33.36    2.94
   1  -9  -3   30.71    3.73
   1  -9  -3   26.69    2.94
  -1   9   3   28.06    2.65
  -1   9   3   28.06    2.16
   1  -9  -3   29.63    3.63
   1  -9  -3   28.16    1.96
  -1   9   2    5.40    2.55
  -1   9   2    4.51    2.36
   1  -9  -2    6.67    3.04
   1  -9  -2    7.36    2.65
  -1   9   2    6.57    1.67
  -1   9   2    6.28    1.96
   1  -9  -2    6.97    2.85
   1  -9  -2    3.93    1.18
  -1   9   1   22.18    2.75
  -1   9   1   29.05    2.65
   1  -9  -1   28.36    2.94
   1  -9  -1   26.89    3.14
  -1   9   1   30.52    2.16
  -1   9   1   29.14    2.45
   1  -9  -1   25.91    1.77
   1  -9  -1   25.91    3.14
   1  -9   0   90.86    4.61
   1  -9   0   83.60    4.22
  -1   9   0   86.74    3.93
  -1   9   0   89.59    4.32
   1  -9   0   82.43    4.71
   1  -9   0   89.69    3.93
  -1   9  -1   30.42    2.65
  -1   9  -1   22.86    2.55
   1  -9   1   25.91    2.65
   1  -9   1   19.43    2.65
  -1   9  -1   19.72    1.96
   1  -9   1   20.70    1.57
   1  -9   2   37.58    3.04
   1  -9   2   46.12    3.04
  -1   9  -3   37.68    2.75
  -1   9  -3   38.66    3.04
   1  -9   3   39.35    2.85
   1  -9   3   42.19    3.14
  -1   9  -3   34.44    2.16
  -1   9  -4   25.41    2.36
  -1   9  -4   24.92    2.55
   1  -9   4   28.36    2.75
   1  -9   4   29.93    2.45
  -1   9  -4   26.30    1.86
   1  -9   4   26.20    2.75
   1  -9   4   25.71    1.67
  -1   9  -5   29.54    2.75
  -1   9  -5   28.06    2.36
   1  -9   5   34.44    3.14
   1  -9   5   31.99    2.55
  -1   9  -5   27.08    1.77
  -1   9  -5   28.36    1.86
   1  -9   5   32.19    2.85
   1  -9   5   30.62    1.86
  -1   9  -6   71.93    3.93
  -1   9  -6   67.51    3.53
   1  -9   6   68.20    4.12
   1  -9   6   67.22    3.53
  -1   9  -6   63.39    3.04
  -1   9  -6   66.14    3.04
   1  -9   6   70.65    3.34
   1  -9   6   62.11    3.73
  -1   9  -7    2.65    2.16
  -1   9  -7    1.37    1.86
   1  -9   7    3.53    2.65
   1  -9   7   -2.16    1.96
  -1   9  -7   -0.20    1.08
  -1   9  -7    0.29    1.18
   1  -9   7   -1.47    1.28
   1  -9   7   -3.73    1.96
  -1   9  -8   97.34    4.91
  -1   9  -8  100.78    4.61
   1  -9   8  104.90    5.40
   1  -9   8  100.68    4.71
  -1   9  -8   96.46    4.12
  -1   9  -8   99.20    4.12
   1  -9   8   88.41    4.32
   1  -9   8   98.62    4.51
  -1   9  -9    2.26    1.77
  -1   9  -9    2.36    2.45
   1  -9   9    0.20    1.96
   1  -9   9    2.75    2.36
  -1   9  -9    0.88    0.98
  -1   9  -9    0.88    1.08
   1  -9   9    1.18    1.67
   1  -9   9    1.18    1.47
  -1   9 -10   -0.59    2.06
  -1   9 -10    0.49    1.08
  -1   9 -10   -0.10    1.08
   1  -9  10   -1.18    1.77
   1  -9  10    1.08    1.67
  -1   9 -11   24.34    2.94
  -1   9 -11   24.53    2.55
   1  -9  11   20.51    2.26
   1  -9  11   28.85    3.34
  -1   9 -11   25.81    1.67
  -1   9 -11   26.49    1.86
   1  -9  11   25.32    2.26
   1  -9  11   29.54    2.94
  -1   9 -12    2.26    2.65
  -1   9 -12    3.73    2.16
   1  -9  12    5.30    1.86
   1  -9  12    7.46    2.94
  -1   9 -12    2.75    1.37
  -1   9 -12    3.73    1.08
   1  -9  12    3.63    2.65
   1  -9  12    4.51    1.57
  -1   9 -13    8.44    3.14
  -1   9 -13    7.75    2.65
   1  -9  13    7.16    2.06
   1  -9  13    5.89    3.14
  -1   9 -13    6.48    1.08
  -1   9 -13    7.07    1.57
   1  -9  13    6.48    1.37
   1  -9  13    4.32    2.36
   1  -9  14   22.67    2.75
   1  -9  14   26.30    1.77
  -1   9 -15   -1.86    3.14
  -1   9 -15   -2.16    2.94
   1  -9  15   -0.20    2.75
   1  -9  15    4.32    3.53
  -1   9 -15    1.37    2.06
  -1   9 -15    1.08    0.98
   1  -9  15    2.75    1.18
   1  -9  15   -0.10    1.57
  -1   9 -16    0.69    3.14
   1  -9  16   -1.18    2.55
   1  -9  16    4.42    2.55
   1  -9  16    0.88    1.28
   1  -9  16    4.91    1.28
  -1   8  20    5.20    4.12
  -1   8  20    4.22    3.34
   1  -8 -20   -4.51    3.63
  -1   8  20    1.86    2.36
  -1   8  20   -2.55    1.77
   1  -8 -20    3.53    2.06
   1  -8 -20   -1.86    1.57
  -1   8  19    6.87    3.93
  -1   8  19   -0.39    3.04
   1  -8 -19    3.43    4.02
   1  -8 -19   -8.14    3.83
  -1   8  19    5.89    1.86
  -1   8  19    3.93    2.65
   1  -8 -19    6.18    3.04
   1  -8 -19    5.89    1.67
  -1   8  18    5.30    4.42
  -1   8  18    4.32    2.94
   1  -8 -18   -1.47    4.42
   1  -8 -18    7.16    4.32
  -1   8  18   -3.63    2.65
  -1   8  18    0.29    1.86
   1  -8 -18    1.18    3.04
   1  -8 -18   -0.98    1.47
  -1   8  17    6.28    4.42
  -1   8  17    1.86    3.14
   1  -8 -17    7.85    4.51
   1  -8 -17    6.57    4.61
  -1   8  17    5.30    1.96
  -1   8  17    5.69    3.24
   1  -8 -17    5.20    1.67
   1  -8 -17    2.06    3.24
  -1   8  16    6.38    3.04
  -1   8  16   15.31    4.51
   1  -8 -16    8.83    4.71
   1  -8 -16    9.03    3.73
  -1   8  16    3.83    3.04
  -1   8  16    6.48    2.16
   1  -8 -16    8.24    1.86
   1  -8 -16    6.08    4.22
  -1   8  15   13.64    4.42
   1  -8 -15   15.60    3.63
  -1   8  15    5.89    2.55
   1  -8 -15    7.16    5.10
   1  -8 -14   24.34    5.40
   1  -8 -14   32.28    3.83
  -1   8  14   31.11    3.83
  -1   8  14   33.85    2.94
   1  -8 -14   33.76    2.55
   1  -8 -14   34.05    5.40
  -1   8  13   27.57    4.51
  -1   8  13   23.06    2.94
   1  -8 -13   29.05    4.91
   1  -8 -13   37.58    3.63
  -1   8  13   37.88    3.73
  -1   8  13   35.82    2.85
   1  -8 -13   31.79    2.45
   1  -8 -13   32.68    5.00
  -1   8  12   10.21    2.45
  -1   8  12    7.07    3.83
   1  -8 -12    6.77    2.94
   1  -8 -12    9.52    4.22
  -1   8  12    4.81    2.94
  -1   8  12    9.03    2.06
   1  -8 -12    8.34    1.77
   1  -8 -12    7.46    4.32
  -1   8  11  141.69    7.16
  -1   8  11  145.42    6.38
   1  -8 -11  142.38    7.75
   1  -8 -11  137.28    6.18
  -1   8  11  134.43    5.99
  -1   8  11  129.62    6.67
   1  -8 -11  141.60    6.08
   1  -8 -11  140.81    7.95
  -1   8  10   12.66    2.55
  -1   8  10   13.05    3.73
   1  -8 -10   13.05    2.85
   1  -8 -10   15.01    4.32
  -1   8  10    8.24    2.94
  -1   8  10   13.74    1.96
   1  -8 -10    8.34    1.67
   1  -8 -10   10.40    3.73
  -1   8   9   60.05    3.83
  -1   8   9   56.62    4.42
   1  -8  -9   60.35    3.83
   1  -8  -9   50.14    5.10
  -1   8   9   57.89    4.32
  -1   8   9   53.38    3.14
   1  -8  -9   60.35    3.24
   1  -8  -9   51.81    4.71
  -1   8   8   96.75    4.81
  -1   8   8   97.54    5.40
   1  -8  -8   99.89    5.00
   1  -8  -8   90.96    5.99
  -1   8   8   95.87    4.51
  -1   8   8   94.40    5.40
   1  -8  -8   96.85    4.42
   1  -8  -8   98.52    5.89
  -1   8   7  132.76    5.99
  -1   8   7  131.29    6.18
   1  -8  -7  127.76    6.77
   1  -8  -7  135.41    6.08
  -1   8   7  138.85    6.77
  -1   8   7  133.45    5.79
   1  -8  -7  135.32    5.79
   1  -8  -7  125.90    6.77
  -1   8   6    7.56    2.85
  -1   8   6    8.64    3.04
   1  -8  -6    8.44    2.75
   1  -8  -6    4.22    4.42
  -1   8   6    7.85    1.77
  -1   8   6    9.91    2.85
   1  -8  -6    6.57    3.53
   1  -8  -6    7.07    1.67
  -1   8   5   59.37    3.93
  -1   8   5   60.94    4.02
   1  -8  -5   58.19    4.91
   1  -8  -5   50.04    3.53
  -1   8   5   56.72    4.02
  -1   8   5   55.34    3.14
   1  -8  -5   55.64    4.51
   1  -8  -5   57.89    3.04
  -1   8   4    8.83    2.85
  -1   8   4    8.34    2.55
   1  -8  -4   11.97    2.45
   1  -8  -4   12.66    3.73
  -1   8   4   15.21    2.75
  -1   8   4   11.78    1.86
   1  -8  -4   13.25    3.34
   1  -8  -4    6.77    1.57
  -1   8   3  291.92   10.99
  -1   8   3  311.75   11.78
   1  -8  -3  297.03   11.48
   1  -8  -3  292.41   11.09
  -1   8   3  313.61   12.27
  -1   8   3  297.81   11.97
   1  -8  -3  315.38   13.05
   1  -8  -3  285.74   11.09
  -1   8   2   54.56    3.53
  -1   8   2   55.34    3.43
   1  -8  -2   50.34    3.43
   1  -8  -2   54.66    3.93
  -1   8   2   52.01    3.24
   1  -8  -2   50.34    2.55
   1  -8  -1   87.33    4.61
   1  -8  -1   82.82    4.32
  -1   8   0   98.52    4.61
  -1   8   0   96.65    4.51
   1  -8   0  106.76    5.00
   1  -8   0   94.40    4.51
  -1   8   0   98.03    4.32
   1  -8   0   91.85    4.91
  -1   8  -1   15.11    2.26
  -1   8  -1   14.72    2.45
   1  -8   1   13.44    2.36
   1  -8   1   13.64    2.45
  -1   8  -1   16.88    1.86
  -1   8  -1   17.86    1.67
   1  -8   1   17.96    1.47
   1  -8   1   21.78    2.75
  -1   8  -2  460.31   16.78
  -1   8  -2  428.22   15.50
   1  -8   2  449.91   16.49
   1  -8   2  437.05   15.90
  -1   8  -2  431.36   16.49
  -1   8  -2  438.43   16.88
   1  -8   2  465.51   18.15
   1  -8   2  447.55   17.07
  -1   8  -3    3.83    2.06
  -1   8  -3    0.20    1.77
   1  -8   3   -0.29    2.16
   1  -8   3   -0.69    1.86
  -1   8  -3    3.14    1.28
  -1   8  -3    0.59    1.18
   1  -8   3    0.10    2.06
   1  -8   3   -0.29    1.08
  -1   8  -4  172.80    6.87
  -1   8  -4  177.80    7.16
   1  -8   4  174.47    7.26
   1  -8   4  170.74    6.87
  -1   8  -4  170.44    6.77
  -1   8  -4  180.45    7.16
   1  -8   4  181.92    7.16
   1  -8   4  160.34    6.97
  -1   8  -5   62.51    3.34
  -1   8  -5   69.18    3.73
   1  -8   5   65.35    3.93
   1  -8   5   63.00    3.34
  -1   8  -5   65.35    3.04
  -1   8  -5   62.11    2.85
   1  -8   5   75.26    3.43
   1  -8   5   62.90    3.34
  -1   8  -6   50.44    2.94
  -1   8  -6   50.83    3.24
   1  -8   6   48.96    3.53
   1  -8   6   48.77    2.94
  -1   8  -6   46.02    2.26
  -1   8  -6   44.84    2.26
  -1   8  -7   67.90    3.53
  -1   8  -7   66.92    3.83
   1  -8   7   69.47    4.12
   1  -8   7   74.58    3.73
  -1   8  -7   72.32    3.14
  -1   8  -7   67.61    3.04
   1  -8   7   63.88    3.34
   1  -8   7   62.31    2.94
  -1   8  -8  182.12    7.36
  -1   8  -8  192.72    7.85
   1  -8   8  198.70    8.24
   1  -8   8  196.94    7.75
  -1   8  -8  204.30    7.95
  -1   8  -8  198.41    7.75
   1  -8   8  210.58    8.44
   1  -8   8  195.86    7.95
  -1   8  -9   31.11    2.94
  -1   8  -9   31.50    2.36
   1  -8   9   34.25    2.55
   1  -8   9   32.77    2.94
  -1   8  -9   32.58    1.77
  -1   8  -9   33.95    1.86
   1  -8   9   33.76    2.26
   1  -8   9   29.44    2.16
  -1   8 -10    5.69    1.77
  -1   8 -10    9.91    2.55
   1  -8  10    6.38    1.86
   1  -8  10    3.63    2.45
  -1   8 -10    3.83    1.08
  -1   8 -10    3.24    1.08
   1  -8  10    7.95    1.67
   1  -8  10    4.02    2.06
  -1   8 -11    7.26    1.37
  -1   8 -11    7.95    1.08
  -1   8 -12   28.55    2.75
  -1   8 -12   27.18    3.34
   1  -8  12   22.86    2.36
   1  -8  12   26.10    3.34
  -1   8 -12   23.65    1.57
  -1   8 -12   24.83    1.96
   1  -8  12   23.06    3.14
   1  -8  12   26.98    2.16
  -1   8 -13    6.38    2.36
  -1   8 -13   11.87    3.04
   1  -8  13   12.46    3.24
   1  -8  13   13.15    2.06
  -1   8 -13   13.64    1.28
  -1   8 -13   12.07    1.96
   1  -8  13   14.13    3.24
   1  -8  13   15.11    1.67
  -1   8 -14    3.63    2.65
  -1   8 -14    2.85    3.14
   1  -8  14    5.30    3.24
   1  -8  14    6.18    2.06
   1  -8  14    4.91    1.28
   1  -8  14    3.43    2.65
  -1   8 -15    5.10    2.94
  -1   8 -15    7.85    3.43
   1  -8  15   15.11    2.45
   1  -8  15    8.54    3.34
   1  -8  15   13.93    1.28
   1  -8  15   10.40    2.45
  -1   8 -16    2.06    3.04
  -1   8 -16    7.16    3.14
   1  -8  16    2.36    3.34
   1  -8  16    4.91    2.85
  -1   8 -16    2.65    1.86
  -1   8 -16    5.10    0.98
   1  -8  16    4.51    1.08
   1  -8  16    0.98    1.47
  -1   8 -17   -0.20    2.94
   1  -8  17    2.26    2.45
   1  -8  17    5.00    2.65
   1  -8  17    6.67    1.08
  -1   7  20    4.02    3.34
  -1   7  20    1.18    4.12
   1  -7 -20   -3.04    3.14
  -1   7  20    2.36    1.96
  -1   7  20   -1.18    2.36
   1  -7 -20    1.47    1.57
   1  -7 -20    2.45    2.16
  -1   7  19    4.12    4.22
  -1   7  19    6.87    2.85
   1  -7 -19    3.73    4.02
   1  -7 -19    4.81    4.32
  -1   7  19    3.93    2.65
  -1   7  19    1.96    1.96
   1  -7 -19    4.42    1.57
   1  -7 -19    0.98    3.34
  -1   7  18   -0.49    2.65
  -1   7  18    4.91    4.32
   1  -7 -18   -2.45    3.93
   1  -7 -18    5.10    4.61
  -1   7  18    5.00    1.96
  -1   7  18    3.83    2.94
   1  -7 -18    3.14    3.24
   1  -7 -18    2.65    1.67
  -1   7  17    9.22    4.51
  -1   7  17   11.19    2.85
   1  -7 -17   -5.89    4.42
   1  -7 -17    7.46    3.83
  -1   7  17    6.87    3.34
  -1   7  16    3.53    2.65
  -1   7  16   -1.18    4.22
   1  -7 -16    0.20    4.71
   1  -7 -16   -4.12    3.43
  -1   7  16   -0.79    3.14
  -1   7  16    3.83    2.16
   1  -7 -16   -0.79    4.71
   1  -7 -16    0.39    1.77
  -1   7  15    0.20    4.51
  -1   7  15   -1.08    2.65
   1  -7 -15    0.59    4.71
  -1   7  15    0.29    2.16
  -1   7  15   -2.85    3.14
   1  -7 -15   -2.94    5.20
  -1   7  14   29.44    4.32
  -1   7  14   26.00    3.04
   1  -7 -14   37.39    3.43
   1  -7 -14   27.08    5.10
  -1   7  14   29.05    2.75
  -1   7  14   28.85    3.53
   1  -7 -14   28.06    5.10
   1  -7 -14   27.08    2.36
  -1   7  13    2.45    2.36
  -1   7  13    1.77    3.53
   1  -7 -13   -5.00    4.42
   1  -7 -13    5.59    2.55
  -1   7  13    0.88    2.06
  -1   7  13    3.53    2.94
   1  -7 -13    1.08    1.67
   1  -7 -13   -2.06    4.22
  -1   7  12   14.82    3.73
  -1   7  12   13.93    2.55
   1  -7 -12   14.62    4.32
   1  -7 -12   10.89    2.55
  -1   7  12   14.13    3.24
  -1   7  12   12.27    2.16
   1  -7 -12   13.05    1.86
   1  -7 -12   10.40    4.51
  -1   7  11    1.67    4.02
  -1   7  11    4.71    2.26
   1  -7 -11    1.67    3.93
   1  -7 -11    6.77    2.65
  -1   7  11    5.89    1.86
  -1   7  11    8.14    2.94
   1  -7 -11    6.48    1.67
   1  -7 -11    3.04    3.93
  -1   7  10   24.24    2.65
  -1   7  10   23.94    4.22
   1  -7 -10   23.84    3.04
   1  -7 -10   22.67    4.22
  -1   7  10   24.14    3.24
  -1   7  10   23.35    2.26
   1  -7 -10   21.88    4.12
   1  -7 -10   21.39    2.06
  -1   7   9  128.94    5.69
  -1   7   9  134.53    6.67
   1  -7  -9  126.68    5.79
   1  -7  -9  135.81    7.16
  -1   7   9  134.43    5.89
  -1   7   9  131.10    6.57
   1  -7  -9  121.87    6.77
   1  -7  -9  132.86    5.69
  -1   7   8   -1.47    3.34
  -1   7   8    1.86    2.55
   1  -7  -8   -3.24    4.32
   1  -7  -8    4.81    2.65
  -1   7   8   -0.39    2.65
  -1   7   8    2.45    1.86
   1  -7  -8   -0.49    3.34
   1  -7  -8    1.57    1.57
  -1   7   7  133.25    6.18
  -1   7   7  144.15    6.28
   1  -7  -7  135.81    5.89
   1  -7  -7  137.38    7.16
  -1   7   7  142.18    6.87
  -1   7   7  154.35    6.57
   1  -7  -7  147.29    7.46
   1  -7  -7  148.07    6.18
  -1   7   6   26.00    3.04
  -1   7   6   34.54    3.63
   1  -7  -6   30.52    4.32
   1  -7  -6   28.06    3.14
  -1   7   6   34.64    2.45
  -1   7   6   33.46    3.43
   1  -7  -6   32.97    2.26
   1  -7  -6   40.04    4.12
  -1   7   5   22.96    3.34
  -1   7   5   23.06    2.94
   1  -7  -5   30.32    4.51
   1  -7  -5   27.48    3.14
  -1   7   5   28.46    2.26
  -1   7   5   30.81    3.14
   1  -7  -5   26.49    2.06
   1  -7  -5   35.03    3.83
  -1   7   4   42.49    3.53
   1  -7  -4   36.70    3.14
  -1   7   4   29.83    3.24
  -1   7   3  202.63    8.24
   1  -7  -3  180.06    8.34
  -1   7   2  173.49    7.26
  -1   7   2  172.60    6.97
   1  -7  -2  183.49    8.05
   1  -7  -2  172.01    6.87
  -1   7   1   20.31    1.86
  -1   7   1   20.61    2.16
   1  -7  -1   20.61    1.57
   1  -7  -1   25.41    2.94
  -1   7   0  207.54    8.05
   1  -7   0  207.24    8.34
  -1   7   0  235.99    9.42
  -1   7   0  220.00    8.64
   1  -7   0  231.77    9.62
   1  -7   0  226.18    8.83
  -1   7  -1   11.58    2.55
  -1   7  -1   11.97    2.16
   1  -7   1    9.91    2.36
   1  -7   1    9.91    2.45
  -1   7  -1    9.03    1.37
  -1   7  -1   11.28    1.67
   1  -7   1    6.48    1.18
   1  -7   1    6.28    2.36
  -1   7  -2   26.10    2.85
  -1   7  -2   26.10    2.36
   1  -7   2   27.97    2.65
   1  -7   2   26.89    2.65
  -1   7  -2   28.85    1.86
  -1   7  -2   23.75    1.86
   1  -7   2   24.04    1.57
   1  -7   2   26.00    2.65
  -1   7  -3  367.19   13.35
  -1   7  -3  384.75   14.13
   1  -7   3  376.70   13.74
   1  -7   3  382.49   14.13
  -1   7  -3  371.11   14.23
  -1   7  -3  369.93   14.13
   1  -7   3  378.86   14.82
   1  -7   3  361.79   13.84
  -1   7  -4   16.58    2.36
  -1   7  -4   14.13    1.96
   1  -7   4   10.79    2.55
   1  -7   4   17.07    2.06
  -1   7  -4   13.84    1.37
  -1   7  -4   12.27    1.18
   1  -7   4   13.05    1.28
   1  -7   4   17.07    1.86
  -1   7  -5  152.98    6.18
  -1   7  -5  147.68    6.18
   1  -7   5  162.01    6.48
   1  -7   5  152.68    6.57
  -1   7  -5  153.47    6.08
  -1   7  -5  153.96    6.08
  -1   7  -6  162.69    6.48
  -1   7  -6  155.53    6.48
   1  -7   6  164.36    6.97
   1  -7   6  165.15    6.57
  -1   7  -6  164.26    6.48
  -1   7  -6  165.05    6.48
   1  -7   6  168.68    6.77
   1  -7   6  159.85    6.57
  -1   7  -7   12.27    1.96
  -1   7  -7   10.21    2.16
   1  -7   7   13.25    2.65
   1  -7   7    6.57    1.77
  -1   7  -7   12.46    1.08
  -1   7  -7   13.54    1.18
   1  -7   7   13.44    1.67
   1  -7   7   14.13    1.67
  -1   7  -8   45.14    3.14
  -1   7  -8   39.25    2.45
   1  -7   8   38.76    3.04
   1  -7   8   38.47    2.55
  -1   7  -8   36.01    1.86
  -1   7  -8   38.07    1.96
   1  -7   8   41.21    2.36
   1  -7   8   35.62    2.26
  -1   7  -9   15.11    2.55
  -1   7  -9   15.21    1.77
   1  -7   9   18.84    2.55
   1  -7   9   17.66    2.06
  -1   7  -9   17.86    1.18
  -1   7  -9   17.56    1.37
   1  -7   9   15.21    1.57
   1  -7   9   15.60    1.96
  -1   7 -10    0.29    1.47
  -1   7 -10    0.29    2.36
   1  -7  10    0.98    2.26
   1  -7  10    0.69    1.67
  -1   7 -10    1.28    0.88
  -1   7 -10   -0.59    1.08
   1  -7  10    1.77    1.18
   1  -7  10   -1.28    2.26
  -1   7 -11   21.59    3.04
  -1   7 -11   21.00    2.16
   1  -7  11   17.17    2.16
   1  -7  11   12.27    2.65
  -1   7 -11   16.29    1.28
  -1   7 -11   17.27    1.57
   1  -7  11   15.80    1.47
   1  -7  11   16.29    2.85
  -1   7 -12  158.87    6.28
  -1   7 -12  157.88    6.48
  -1   7 -13   21.20    2.55
  -1   7 -13   19.04    3.24
   1  -7  13   19.72    3.24
   1  -7  13   21.49    2.26
   1  -7  13   23.55    1.67
   1  -7  13   29.93    3.83
  -1   7 -14    1.47    2.26
  -1   7 -14    0.00    3.14
   1  -7  14    1.96    1.86
   1  -7  14    4.12    3.04
  -1   7 -14    3.04    0.98
  -1   7 -14    3.14    2.06
   1  -7  14    1.96    1.08
   1  -7  14    1.28    3.24
  -1   7 -15    6.87    3.93
  -1   7 -15   11.48    2.85
   1  -7  15   10.50    2.26
   1  -7  15    5.59    3.24
  -1   7 -15   10.70    1.18
  -1   7 -15   10.11    2.16
   1  -7  15   10.60    1.18
   1  -7  15    6.48    2.45
  -1   7 -16   -1.86    2.94
  -1   7 -16    3.93    3.73
   1  -7  16    0.79    2.45
   1  -7  16   -0.98    3.04
  -1   7 -16    0.98    0.98
  -1   7 -16    1.67    1.86
   1  -7  16   -0.69    0.88
   1  -7  16    1.86    2.06
  -1   7 -17    0.29    3.04
  -1   7 -17   -0.69    3.43
   1  -7  17    3.34    2.94
   1  -7  17    0.39    2.85
   1  -7  17    0.39    1.47
   1  -7  17    0.69    0.88
  -1   6  21    1.67    3.14
  -1   6  21    0.10    3.93
   1  -6 -21    2.06    3.53
   1  -6 -21   -1.47    1.67
  -1   6  21   -0.20    1.86
  -1   6  21   -2.65    2.16
   1  -6 -21   -1.57    1.37
   1  -6 -21    0.49    1.96
  -1   6  20    9.81    4.02
  -1   6  20    7.65    3.34
   1  -6 -20    1.96    2.55
  -1   6  20    2.94    1.96
  -1   6  20    5.10    2.45
   1  -6 -20    4.12    1.67
   1  -6 -20   -1.57    2.65
  -1   6  19   -5.59    4.12
  -1   6  19   -1.96    2.55
   1  -6 -19   -0.69    4.51
   1  -6 -19    3.73    3.63
  -1   6  19    1.08    1.96
  -1   6  19   -4.02    2.75
   1  -6 -19   -2.65    3.63
   1  -6 -19    0.98    1.67
  -1   6  18    8.64    2.65
  -1   6  18    5.00    4.51
   1  -6 -18   -4.32    3.93
   1  -6 -18    9.32    4.42
   1  -6 -18    6.18    1.96
  -1   6  17   19.33    4.61
  -1   6  17   14.92    2.65
   1  -6 -17    9.42    4.22
   1  -6 -17   14.23    3.83
  -1   6  17   12.46    3.34
  -1   6  17   17.17    2.45
   1  -6 -17   19.33    4.42
   1  -6 -17   16.39    2.06
  -1   6  16    0.00    3.24
   1  -6 -16   10.21    1.86
   1  -6 -16    8.73    4.81
  -1   6  15   14.92    2.65
  -1   6  15    9.03    4.12
   1  -6 -15   12.56    2.94
   1  -6 -15   11.97    4.61
  -1   6  15   11.87    3.24
  -1   6  15   11.48    2.36
   1  -6 -15   18.55    5.00
   1  -6 -15    9.52    1.86
  -1   6  14    3.34    3.63
  -1   6  14    5.89    2.36
   1  -6 -14    1.77    2.55
   1  -6 -14    1.77    4.22
  -1   6  14    4.71    3.14
  -1   6  14    5.50    2.16
   1  -6 -14    4.81    1.77
  -1   6  13   61.82    4.71
  -1   6  13   70.06    3.93
   1  -6 -13   70.85    4.02
   1  -6 -13   61.13    5.40
  -1   6  13   63.98    3.73
  -1   6  13   59.66    4.51
   1  -6 -13   64.08    5.89
   1  -6 -13   65.06    3.43
  -1   6  12   10.60    2.36
  -1   6  12    7.26    3.63
   1  -6 -12    7.65    4.12
   1  -6 -12   10.99    2.55
  -1   6  12    9.32    3.04
  -1   6  12    8.05    2.16
   1  -6 -12    9.52    1.77
   1  -6 -12    5.59    4.22
  -1   6  11   50.14    4.42
  -1   6  11   48.67    3.24
   1  -6 -11   55.34    4.91
   1  -6 -11   50.63    3.43
  -1   6  11   51.91    3.24
  -1   6  11   52.30    4.12
   1  -6 -11   57.40    5.30
   1  -6 -11   49.85    2.85
  -1   6  10   74.48    3.93
  -1   6  10   72.51    4.81
   1  -6 -10   78.50    5.40
   1  -6 -10   72.22    4.02
  -1   6  10   72.42    4.61
  -1   6  10   73.99    3.83
   1  -6 -10   78.99    5.69
   1  -6 -10   67.22    3.43
  -1   6   9  232.26    9.03
  -1   6   9  237.66    9.91
   1  -6  -9  230.20    9.03
   1  -6  -9  253.36   10.70
  -1   6   9  230.60   10.01
  -1   6   9  233.05    9.42
   1  -6  -9  223.24   10.21
   1  -6  -9  241.78    9.62
  -1   6   8    7.16    2.55
  -1   6   8    4.81    3.83
   1  -6  -8    8.05    4.22
   1  -6  -8    7.95    2.75
  -1   6   8    4.51    1.96
  -1   6   8    3.53    2.85
   1  -6  -8    4.02    1.67
   1  -6  -8    2.55    3.43
  -1   6   7   19.82    3.93
  -1   6   7   11.68    2.65
   1  -6  -7   17.07    4.32
   1  -6  -7   12.17    2.65
  -1   6   7   13.35    2.06
  -1   6   7   15.11    2.85
   1  -6  -7    7.95    3.43
   1  -6  -7   10.79    1.67
  -1   6   6  152.78    7.16
   1  -6  -6  155.92    6.57
  -1   6   5    0.49    2.36
   1  -6  -5   -1.86    3.73
  -1   6   5   -1.18    1.67
   1  -6  -5   -1.96    2.94
  -1   6   4    0.49    2.16
  -1   6   4   -3.34    2.55
   1  -6  -4   -0.29    2.26
   1  -6  -4   -1.18    3.34
  -1   6   4    3.93    2.26
  -1   6   4    2.65    1.47
   1  -6  -4    2.65    2.65
   1  -6  -4   -0.10    1.28
  -1   6   3   18.35    2.85
  -1   6   3   16.49    2.36
   1  -6  -3   16.19    2.36
   1  -6  -3   11.87    2.94
  -1   6   3   18.94    1.77
  -1   6   3   16.98    2.45
   1  -6  -3   17.37    1.57
   1  -6  -3   13.74    2.65
  -1   6   2  180.65    7.07
  -1   6   2  179.67    6.97
   1  -6  -2  177.31    7.07
   1  -6  -2  175.35    6.87
  -1   6   2  172.80    7.16
  -1   6   2  182.12    7.26
   1  -6  -2  181.92    7.75
   1  -6  -2  176.43    6.97
  -1   6   1    7.85    2.06
  -1   6   1    6.57    2.16
   1  -6  -1    9.42    2.16
   1  -6  -1    9.32    2.45
  -1   6   1    9.22    1.77
  -1   6   1    9.91    1.47
   1  -6  -1   10.01    1.18
   1  -6  -1    6.67    2.26
  -1   6   0  366.79   13.25
  -1   6   0  368.36   13.35
   1  -6   0  367.09   13.35
   1  -6   0  378.96   13.84
  -1   6   0  370.42   14.13
  -1   6   0  374.84   14.52
   1  -6   0  368.76   14.42
   1  -6   0  373.47   14.23
  -1   6  -1   47.79    2.94
  -1   6  -1   48.57    2.75
   1  -6   1   44.25    2.85
   1  -6   1   48.67    2.94
  -1   6  -1   52.50    2.55
  -1   6  -1   49.36    2.65
   1  -6   1   54.07    2.45
   1  -6   1   52.50    3.14
  -1   6  -2  139.24    5.79
  -1   6  -2  139.04    5.59
  -1   6  -2  135.51    5.50
   1  -6   2  136.30    5.79
   1  -6   2  135.12    5.40
  -1   6  -3   14.92    1.47
  -1   6  -3   14.92    1.28
   1  -6   3   16.58    1.86
   1  -6   3   15.50    1.18
  -1   6  -4  196.55    7.56
  -1   6  -4  182.02    7.26
   1  -6   4  201.55    7.75
   1  -6   4  198.02    7.95
  -1   6  -4  192.91    7.56
  -1   6  -4  201.65    7.85
   1  -6   4  207.54    8.24
   1  -6   4  203.61    7.95
  -1   6  -5    2.36    1.77
  -1   6  -5    0.88    2.06
   1  -6   5    1.86    1.67
   1  -6   5    3.53    2.45
  -1   6  -5    2.45    0.88
  -1   6  -5    1.96    0.98
   1  -6   5    1.28    1.57
   1  -6   5    4.02    1.28
  -1   6  -6   50.63    3.24
  -1   6  -6   50.34    2.85
   1  -6   6   47.98    2.75
   1  -6   6   53.67    3.63
  -1   6  -6   50.44    2.26
  -1   6  -6   51.32    2.36
   1  -6   6   40.23    2.16
  -1   6  -7   44.94    2.55
  -1   6  -7   47.00    3.14
   1  -6   7   44.35    3.04
   1  -6   7   45.33    2.65
  -1   6  -7   49.16    2.26
  -1   6  -7   47.69    2.26
   1  -6   7   46.61    2.36
   1  -6   7   48.38    2.65
  -1   6  -8   11.38    1.57
  -1   6  -8    9.13    2.26
   1  -6   8    9.71    2.26
   1  -6   8   11.19    1.77
  -1   6  -8   11.38    1.08
  -1   6  -8   11.28    0.98
   1  -6   8   12.27    1.77
   1  -6   8    9.32    1.18
  -1   6  -9  164.46    6.48
  -1   6  -9  172.50    7.26
   1  -6   9  162.79    6.97
   1  -6   9  165.15    6.57
  -1   6  -9  168.29    6.57
  -1   6  -9  174.07    6.87
   1  -6   9  169.17    6.77
   1  -6   9  170.44    7.26
  -1   6 -10    0.49    2.55
  -1   6 -10    0.69    1.47
   1  -6  10    1.08    1.77
   1  -6  10    1.86    2.16
  -1   6 -10    0.98    0.88
  -1   6 -10    1.28    1.18
   1  -6  10   -0.59    2.45
   1  -6  10    1.28    1.08
  -1   6 -11   90.67    5.00
  -1   6 -11   87.92    4.12
   1  -6  11   85.66    4.71
   1  -6  11   85.86    4.12
  -1   6 -11   90.37    4.02
  -1   6 -11   82.52    3.53
   1  -6  11   88.21    3.83
   1  -6  11   85.57    4.81
  -1   6 -12    2.65    3.14
  -1   6 -12    3.83    1.86
   1  -6  12    3.04    1.96
   1  -6  12    4.51    2.55
  -1   6 -12    5.50    0.98
  -1   6 -12    5.00    1.77
   1  -6  12    4.91    3.34
   1  -6  12    3.14    1.08
  -1   6 -13    2.94    0.98
  -1   6 -13    0.00    2.16
   1  -6  13   -0.59    1.08
   1  -6  13    0.59    3.53
  -1   6 -14    7.95    2.36
  -1   6 -14    6.97    3.34
   1  -6  14    9.03    2.16
   1  -6  14   10.40    3.04
  -1   6 -14    2.36    2.26
  -1   6 -14    6.57    1.08
   1  -6  14    8.24    3.63
   1  -6  14    9.22    1.18
  -1   6 -15    4.61    3.43
  -1   6 -15   -3.73    2.45
   1  -6  15    0.20    1.96
   1  -6  15   -4.51    2.94
  -1   6 -15    2.65    1.96
  -1   6 -15    0.79    0.98
   1  -6  15   -1.67    2.85
   1  -6  15    1.28    0.98
  -1   6 -16   -0.20    2.94
  -1   6 -16    5.00    3.63
   1  -6  16    3.73    2.94
   1  -6  16    5.30    2.26
  -1   6 -16    0.69    1.77
  -1   6 -16    0.79    0.98
   1  -6  16    0.69    0.88
   1  -6  16    1.18    2.16
  -1   6 -17    3.93    3.53
  -1   6 -17    2.94    3.34
   1  -6  17    9.13    3.43
   1  -6  17   14.42    2.94
  -1   6 -17   12.36    1.28
  -1   6 -18   -2.06    3.14
   1  -6  18    0.88    2.85
   1  -6  18    0.29    2.85
  -1   5  21    3.04    3.04
  -1   5  21    1.77    3.73
   1  -5 -21    6.77    3.63
   1  -5 -21    1.37    1.47
  -1   5  21    2.65    1.77
  -1   5  21   -0.79    2.16
   1  -5 -21    3.43    1.67
   1  -5 -21   -0.49    2.06
  -1   5  20   -0.59    3.63
  -1   5  20    0.88    2.94
   1  -5 -20    3.53    4.42
   1  -5 -20   -3.83    2.65
  -1   5  20   -0.88    1.86
  -1   5  20   -0.29    2.55
   1  -5 -20   -0.69    3.43
   1  -5 -20    0.29    1.57
  -1   5  19    2.16    2.65
  -1   5  19    0.69    3.83
   1  -5 -19   -0.29    4.51
  -1   5  18    2.45    4.12
  -1   5  18   -0.39    2.36
   1  -5 -18    4.22    4.02
   1  -5 -18   -2.85    3.83
  -1   5  18   -1.37    2.06
  -1   5  18   -1.57    2.85
   1  -5 -18    0.10    1.67
   1  -5 -18   -2.06    4.22
  -1   5  17    7.85    2.36
  -1   5  17    3.83    4.22
   1  -5 -17   -1.57    4.02
   1  -5 -17    1.67    3.43
  -1   5  17    7.65    3.14
  -1   5  17    1.96    2.06
   1  -5 -17    3.53    1.77
   1  -5 -17    4.12    4.51
  -1   5  16   11.38    2.36
  -1   5  16   13.05    4.32
   1  -5 -16    6.28    4.02
  -1   5  16    9.52    3.34
  -1   5  16   10.50    2.26
   1  -5 -16   11.09    4.61
   1  -5 -16    8.93    1.96
  -1   5  15    5.99    3.73
  -1   5  15    0.69    2.06
   1  -5 -15   -0.79    2.65
   1  -5 -15    1.18    3.63
  -1   5  15   -1.57    2.16
   1  -5 -15    4.61    4.61
   1  -5 -15   -1.57    1.67
  -1   5  14    0.00    2.16
  -1   5  14    5.69    3.63
   1  -5 -14    1.47    2.45
   1  -5 -14    4.02    4.02
  -1   5  14   -2.45    1.96
  -1   5  14    2.94    3.14
   1  -5 -14    3.34    1.67
   1  -5 -14    3.73    4.51
  -1   5  13   60.05    4.91
  -1   5  13   62.80    3.63
   1  -5 -13   49.46    4.81
   1  -5 -13   52.99    3.43
  -1   5  13   62.02    3.63
  -1   5  13   60.64    4.61
   1  -5 -13   56.72    3.14
   1  -5 -13   57.50    5.79
  -1   5  12   11.38    2.26
  -1   5  12   13.25    3.73
   1  -5 -12   12.36    2.55
   1  -5 -12   15.01    3.93
  -1   5  12   15.41    2.26
  -1   5  12   11.78    3.24
   1  -5 -12   11.87    1.86
   1  -5 -12   13.25    4.22
  -1   5  11  204.00    8.73
  -1   5  11  220.29    8.54
   1  -5 -11  221.47    8.64
   1  -5 -11  234.42   10.01
  -1   5  11  225.00    9.22
  -1   5  11  214.99    9.62
   1  -5 -11  225.89    9.13
   1  -5 -11  230.40   10.79
  -1   5  10  104.21    5.69
  -1   5  10  113.53    5.10
   1  -5 -10  111.47    6.48
   1  -5 -10  114.02    5.20
  -1   5  10  118.63    6.08
  -1   5  10  119.22    5.40
   1  -5 -10  122.36    7.07
   1  -5 -10  117.55    5.20
  -1   5   9   16.29    3.63
  -1   5   9   13.35    2.45
   1  -5  -9   16.29    4.22
   1  -5  -9   10.30    2.45
  -1   5   9   15.99    2.16
  -1   5   9   14.13    3.14
   1  -5  -9   15.11    1.86
   1  -5  -9   15.31    3.93
  -1   5   8   40.13    4.32
   1  -5  -8   30.81    2.85
  -1   5   8   29.14    3.34
   1  -5  -8   33.36    2.26
  -1   5   7   33.76    2.75
   1  -5  -7   39.64    4.12
   1  -5  -7   31.69    4.22
  -1   5   6   20.21    3.43
  -1   5   6   21.49    2.36
   1  -5  -6   22.96    3.63
   1  -5  -6   20.02    2.36
  -1   5   6   21.20    1.96
  -1   5   6   17.76    2.65
   1  -5  -6   19.33    1.77
   1  -5  -6   21.98    3.24
  -1   5   5  274.75   10.21
  -1   5   5  263.17   10.01
   1  -5  -5  265.33   10.30
   1  -5  -5  267.59    9.91
  -1   5   5  278.38   10.89
  -1   5   5  268.28   10.89
   1  -5  -5  270.83   10.50
   1  -5  -5  280.15   11.48
  -1   5   4    5.00    2.45
  -1   5   4    3.93    1.96
   1  -5  -4   -1.28    2.94
   1  -5  -4    5.20    2.06
  -1   5   4    4.61    1.37
  -1   5   4    5.69    2.16
   1  -5  -4    7.36    2.55
   1  -5  -4    4.42    1.28
  -1   5   3    4.81    2.26
  -1   5   3    2.65    1.86
   1  -5  -3    6.97    2.55
   1  -5  -3    5.50    2.06
  -1   5   3    6.28    2.16
  -1   5   3    2.94    1.37
   1  -5  -3   10.70    2.36
   1  -5  -3    5.79    1.28
  -1   5   2  459.23   16.39
  -1   5   2  500.73   17.76
   1  -5  -2  477.58   17.07
   1  -5  -2  473.75   16.88
  -1   5   2  460.50   17.47
  -1   5   2  478.36   18.35
   1  -5  -2  487.39   18.45
   1  -5  -2  463.64   17.96
  -1   5   1  359.92   12.95
  -1   5   1  356.20   12.85
   1  -5  -1  365.42   13.25
   1  -5  -1  372.68   13.44
  -1   5   1  350.41   13.54
  -1   5   1  371.31   14.13
   1  -5  -1  362.77   13.84
   1  -5  -1  370.03   14.42
  -1   5   0  561.57   19.92
  -1   5   0  575.41   20.31
   1  -5   0  569.42   20.12
   1  -5   0  597.49   21.20
  -1   5   0  577.37   21.78
  -1   5   0  589.83   22.37
   1  -5   0  566.68   21.39
   1  -5   0  597.78   22.77
  -1   5  -1 1159.84   40.53
  -1   5  -1 1118.63   39.05
   1  -5   1 1155.92   40.43
   1  -5   1 1114.71   38.96
  -1   5  -1 1125.50   42.29
  -1   5  -1 1109.80   41.61
   1  -5   1 1132.37   42.49
   1  -5   1 1091.16   41.11
  -1   5  -2  326.56   11.78
  -1   5  -2  349.43   12.76
   1  -5   2  335.98   12.17
   1  -5   2  341.67   12.46
  -1   5  -2  337.26   12.85
  -1   5  -2  339.51   12.95
   1  -5   2  332.84   12.85
   1  -5   2  345.01   13.15
  -1   5  -3  184.28    6.97
  -1   5  -3  192.72    7.46
   1  -5   3  192.91    7.36
   1  -5   3  185.36    7.26
  -1   5  -3  186.05    7.16
  -1   5  -3  189.28    7.36
   1  -5   3  179.67    6.97
   1  -5   3  194.48    7.75
  -1   5  -4    4.02    1.86
  -1   5  -4    4.61    1.57
   1  -5   4    5.20    2.36
   1  -5   4    3.73    1.67
  -1   5  -4    4.71    0.98
  -1   5  -4    5.69    0.98
   1  -5   4    5.20    1.37
   1  -5   4    4.42    1.18
  -1   5  -5   13.35    1.28
  -1   5  -5   13.35    1.18
   1  -5   5   15.01    1.47
   1  -5   5   15.80    1.47
  -1   5  -6   66.82    3.73
   1  -5   6   63.59    3.93
   1  -5   6   66.23    3.34
  -1   5  -6   65.84    2.75
  -1   5  -6   67.02    2.85
   1  -5   6   61.92    2.85
   1  -5   6   67.51    3.24
  -1   5  -7  140.91    5.59
  -1   5  -7  143.17    6.18
   1  -5   7  145.52    6.28
   1  -5   7  135.81    5.50
  -1   5  -7  134.92    5.30
  -1   5  -7  129.43    5.10
  -1   5  -8  144.24    5.69
  -1   5  -8  149.64    6.48
   1  -5   8  145.32    5.89
   1  -5   8  143.36    6.28
  -1   5  -8  142.77    5.59
  -1   5  -8  143.56    5.69
   1  -5   8  150.23    5.99
   1  -5   8  142.28    6.18
  -1   5  -9    4.81    2.45
  -1   5  -9    0.79    1.37
   1  -5   9    1.86    1.77
   1  -5   9    0.98    2.16
  -1   5  -9    3.24    1.08
  -1   5  -9    4.32    0.88
   1  -5   9    3.63    0.88
   1  -5   9    4.71    2.26
  -1   5 -10   56.13    3.73
  -1   5 -10   50.73    2.85
   1  -5  10   56.42    3.14
   1  -5  10   51.03    3.53
  -1   5 -10   62.31    2.75
  -1   5 -10   58.38    2.75
   1  -5  10   53.28    3.63
   1  -5  10   54.56    2.45
  -1   5 -11   37.29    3.34
  -1   5 -11   31.40    2.36
   1  -5  11   34.54    3.04
   1  -5  11   38.47    2.65
   1  -5  11   33.26    3.63
   1  -5  11   31.79    1.77
  -1   5 -12    8.14    2.85
  -1   5 -12    5.59    1.77
   1  -5  12    6.97    1.96
   1  -5  12   10.11    2.55
  -1   5 -12    5.89    1.96
  -1   5 -12    6.87    1.28
   1  -5  12    5.79    1.08
   1  -5  12    8.64    3.53
   1  -5  13   49.16    3.14
   1  -5  13   52.79    3.83
   1  -5  13   47.30    4.42
   1  -5  13   51.03    2.45
  -1   5 -14    4.51    2.36
  -1   5 -14    1.18    1.18
  -1   5 -14    0.79    2.55
   1  -5  14    1.86    3.83
   1  -5  14    2.36    0.98
  -1   5 -15   19.53    2.75
  -1   5 -15   19.13    3.63
   1  -5  15   17.07    2.36
   1  -5  15   20.41    3.43
  -1   5 -15   22.47    1.77
  -1   5 -15   20.41    2.36
   1  -5  15   16.88    3.53
   1  -5  15   21.98    1.47
  -1   5 -16   -1.47    3.53
  -1   5 -16   -0.49    2.85
   1  -5  16   -1.86    1.96
   1  -5  16   -1.47    3.24
  -1   5 -16    0.69    1.28
  -1   5 -17    6.97    3.73
  -1   5 -17    2.26    3.14
   1  -5  17    6.48    2.94
   1  -5  17   11.97    2.45
  -1   5 -17    4.71    1.86
  -1   5 -18   -4.02    3.43
  -1   5 -18   -0.98    3.34
   1  -5  18    0.98    3.34
   1  -5  18    8.73    3.04
  -1   5 -18    5.00    1.28
  -1   5 -18    4.91    1.96
   1  -5  18    1.77    1.86
   1  -5  18    5.10    0.88
   1  -5  19    1.28    2.75
   1  -5  19    4.91    2.85
   1  -5  19    2.45    0.88
   1  -5  19    1.37    1.47
  -1   4  21    1.47    2.85
  -1   4  21    0.49    3.63
   1  -4 -21   -4.12    3.34
   1  -4 -21   -3.93    2.75
  -1   4  21   -0.98    2.36
  -1   4  21   -2.06    1.86
   1  -4 -21   -0.59    2.06
   1  -4 -21   -0.88    1.57
  -1   4  20   -1.08    2.65
  -1   4  20   -2.65    3.63
   1  -4 -20    1.57    4.32
   1  -4 -20   -0.79    3.63
  -1   4  19    1.77    2.36
  -1   4  19   -0.98    3.83
   1  -4 -19   -4.12    3.93
  -1   4  19    0.98    1.86
  -1   4  19   -0.88    2.94
   1  -4 -19    1.67    1.67
   1  -4 -19    4.22    3.83
  -1   4  18    1.86    4.32
  -1   4  18    3.83    2.16
   1  -4 -18   -3.63    3.93
   1  -4 -18    2.16    3.43
  -1   4  18    1.37    2.06
  -1   4  18   -1.47    3.04
   1  -4 -18    0.49    4.32
   1  -4 -18    1.47    1.67
  -1   4  17    2.94    4.12
   1  -4 -17   -0.10    3.14
  -1   4  17   -0.79    3.14
  -1   4  17    1.28    2.26
   1  -4 -17    1.57    1.77
   1  -4 -17    2.45    4.42
  -1   4  16    4.71    2.16
  -1   4  16    1.86    3.83
   1  -4 -16    5.00    3.83
   1  -4 -16    7.26    2.85
  -1   4  16   10.89    3.43
  -1   4  16    8.05    2.16
   1  -4 -16    6.48    1.86
   1  -4 -16    5.89    4.71
  -1   4  15    2.45    1.96
  -1   4  15   -7.16    3.53
   1  -4 -15    1.57    2.36
   1  -4 -15    1.08    3.43
  -1   4  15    0.39    1.96
  -1   4  15    0.10    3.24
   1  -4 -15    3.24    1.77
   1  -4 -15   -3.73    4.22
  -1   4  14   -2.75    3.53
  -1   4  14    1.08    1.86
   1  -4 -14   -2.26    3.24
   1  -4 -14    1.37    2.26
  -1   4  14    1.18    2.06
  -1   4  14   -0.88    3.24
   1  -4 -14   -0.39    1.67
   1  -4 -14   -0.88    4.22
  -1   4  13   29.63    2.45
  -1   4  13   27.38    4.02
   1  -4 -13   28.65    3.73
   1  -4 -13   36.40    2.94
  -1   4  13   33.66    3.83
  -1   4  13   33.56    2.75
   1  -4 -13   29.44    4.71
   1  -4 -13   32.48    2.36
  -1   4  12    1.18    1.96
  -1   4  12    2.06    3.43
   1  -4 -12   -1.96    3.43
   1  -4 -12   -1.47    2.16
  -1   4  12    1.57    1.96
  -1   4  12    4.42    3.14
   1  -4 -12    0.98    3.93
   1  -4 -12    0.79    1.67
  -1   4  11   12.66    2.16
  -1   4  11    8.64    3.53
   1  -4 -11    9.13    3.63
   1  -4 -11    9.52    2.26
  -1   4  11   10.79    2.06
  -1   4  11   15.01    3.14
   1  -4 -11   12.17    1.77
   1  -4 -11   15.80    4.02
  -1   4  10   91.16    4.32
  -1   4  10   84.68    5.30
  -1   4  10   95.38    5.50
  -1   4  10   88.71    4.42
   1  -4 -10   91.16    4.22
   1  -4 -10   91.26    6.08
  -1   4   9   56.72    4.71
  -1   4   9   52.60    3.34
   1  -4  -9   49.26    3.24
   1  -4  -9   52.89    4.91
  -1   4   8    6.48    2.06
   1  -4  -8    4.32    3.53
  -1   4   8    0.98    2.94
  -1   4   8    4.61    1.86
   1  -4  -8    5.89    3.43
   1  -4  -8    2.85    1.67
  -1   4   7    1.77    1.86
  -1   4   7    0.39    3.04
   1  -4  -7    1.67    1.96
   1  -4  -7    4.02    3.24
  -1   4   7    1.67    1.57
  -1   4   7    3.43    2.55
   1  -4  -7    4.02    1.47
   1  -4  -7    1.08    2.85
  -1   4   6   19.04    2.06
  -1   4   6   16.19    2.94
   1  -4  -6   23.75    3.24
   1  -4  -6   22.08    2.16
  -1   4   6   22.18    2.65
  -1   4   6   20.61    1.86
   1  -4  -6   25.02    2.94
   1  -4  -6   19.63    1.67
  -1   4   5    0.20    2.85
  -1   4   5   -1.37    1.86
   1  -4  -5    2.16    2.94
   1  -4  -5    1.57    1.86
  -1   4   5    0.39    1.47
  -1   4   5    0.98    2.16
   1  -4  -5    3.24    1.28
   1  -4  -5    3.73    2.65
  -1   4   4  189.09    7.36
  -1   4   4  190.36    7.16
   1  -4  -4  188.11    7.07
   1  -4  -4  186.14    7.46
  -1   4   4  203.81    8.05
  -1   4   4  200.37    8.24
   1  -4  -4  193.50    7.65
   1  -4  -4  199.78    8.44
  -1   4   3 1658.32   57.70
  -1   4   3 1688.74   58.68
   1  -4  -3 1698.55   59.07
   1  -4  -3 1730.94   60.25
  -1   4   3 1748.60   65.65
  -1   4   3 1721.12   64.47
   1  -4  -3 1666.17   62.60
   1  -4  -3 1719.16   64.37
  -1   4   2 3978.01  137.77
  -1   4   2 3953.48  136.98
   1  -4  -2 3894.61  134.92
   1  -4  -2 3881.85  134.43
  -1   4   2 3951.52  147.68
  -1   4   2 3788.63  141.50
   1  -4  -2 3947.59  147.38
   1  -4  -2 3748.40  140.12
  -1   4   1   15.21    2.16
  -1   4   1   17.07    2.26
   1  -4  -1   17.76    2.16
   1  -4  -1   13.25    2.45
  -1   4   1   16.78    1.86
  -1   4   1   17.47    1.57
   1  -4  -1   17.27    2.36
   1  -4  -1   15.50    1.37
  -1   4   0   44.75    2.75
  -1   4   0   44.75    2.55
   1  -4   0   44.55    2.75
   1  -4   0   42.49    2.65
  -1   4   0   43.27    2.45
  -1   4   0   42.68    2.16
   1  -4   0   40.92    2.65
   1  -4   0   44.06    2.16
  -1   4  -1   28.16    2.06
  -1   4  -1   35.13    2.45
   1  -4   1   26.69    2.06
   1  -4   1   31.40    2.45
  -1   4  -1   29.63    1.67
  -1   4  -1   25.91    1.77
   1  -4   1   27.48    1.57
   1  -4   1   29.63    2.06
  -1   4  -2  912.57   31.89
  -1   4  -2  932.19   32.68
   1  -4   2  955.74   33.46
   1  -4   2  947.11   33.26
  -1   4  -2  952.80   35.72
  -1   4  -2  937.30   35.13
   1  -4   2  910.12   34.15
   1  -4   2  961.93   36.21
  -1   4  -3  373.86   13.54
  -1   4  -3  382.59   13.64
   1  -4   3  399.08   14.42
   1  -4   3  380.04   13.64
  -1   4  -3  393.09   14.82
  -1   4  -3  379.55   14.42
   1  -4   3  387.01   14.72
   1  -4   3  399.27   15.11
  -1   4  -4  200.37    7.65
  -1   4  -4  199.78    7.46
   1  -4   4  202.73    7.85
   1  -4   4  191.54    7.16
  -1   4  -4  213.23    8.14
  -1   4  -4  210.09    8.05
   1  -4   4  214.80    8.34
   1  -4   4  205.28    7.95
  -1   4  -5   -0.88    1.86
  -1   4  -5    0.79    1.47
   1  -4   5    0.69    1.47
   1  -4   5    5.69    2.26
  -1   4  -5   -0.29    0.79
  -1   4  -5    0.29    0.79
   1  -4   5   -0.69    1.28
   1  -4   5   -0.10    0.98
  -1   4  -6    1.67    0.88
  -1   4  -6    1.67    0.88
   1  -4   6    2.75    0.98
   1  -4   6    0.69    1.37
  -1   4  -7  493.57   17.56
  -1   4  -7  520.95   18.94
   1  -4   7  516.14   18.74
   1  -4   7  501.23   17.96
  -1   4  -7  535.28   20.21
  -1   4  -7  503.48   19.04
   1  -4   7  507.70   19.43
   1  -4   7  498.58   18.84
  -1   4  -8    6.97    1.47
  -1   4  -8    9.71    2.55
   1  -4   8    9.62    1.86
   1  -4   8    5.79    2.26
  -1   4  -8   10.40    1.28
  -1   4  -8    8.73    1.18
   1  -4   8    4.42    2.36
  -1   4  -9  203.81    8.34
  -1   4  -9  205.18    7.85
   1  -4   9  208.22    8.54
   1  -4   9  193.60    7.56
  -1   4  -9  197.43    7.75
  -1   4  -9  207.44    8.14
  -1   4 -10    4.61    1.57
  -1   4 -10    3.83    2.55
   1  -4  10    5.00    2.26
   1  -4  10    4.81    1.77
  -1   4 -10    5.00    1.37
  -1   4 -10    3.93    1.18
   1  -4  10    4.71    0.98
   1  -4  10    6.08    2.75
  -1   4 -11    7.16    1.67
  -1   4 -11    6.48    2.55
   1  -4  11    5.79    1.77
   1  -4  11    9.13    2.45
  -1   4 -11    5.69    1.77
  -1   4 -11    6.57    1.28
   1  -4  11    7.26    1.08
   1  -4  11    5.00    3.43
  -1   4 -12   30.81    2.36
  -1   4 -12   28.06    3.24
   1  -4  12   28.65    2.36
   1  -4  12   32.09    3.14
  -1   4 -12   27.48    2.36
  -1   4 -12   29.05    1.86
   1  -4  12   32.38    1.86
   1  -4  12   32.77    4.02
  -1   4 -13   13.44    1.96
  -1   4 -13    9.03    3.04
   1  -4  13   12.85    2.06
   1  -4  13   12.56    2.65
  -1   4 -13    9.32    2.06
  -1   4 -13    8.24    1.37
   1  -4  13   13.35    3.73
   1  -4  13   15.11    1.37
  -1   4 -14    4.42    3.34
  -1   4 -14    3.83    1.96
   1  -4  14    3.53    2.75
   1  -4  14    1.47    1.96
  -1   4 -14    3.63    1.96
  -1   4 -14    1.96    1.28
   1  -4  14    2.85    1.08
   1  -4  14    1.67    3.73
  -1   4 -15    0.10    3.53
  -1   4 -15    5.89    2.45
   1  -4  15    8.54    2.16
   1  -4  15    9.42    3.34
  -1   4 -15   11.87    1.47
  -1   4 -16   23.35    3.93
  -1   4 -16   13.84    2.85
   1  -4  16   17.76    3.53
   1  -4  16   15.11    2.26
  -1   4 -16   12.85    2.26
  -1   4 -17    4.71    3.14
  -1   4 -17    5.99    3.83
   1  -4  17    9.71    2.26
   1  -4  17   12.56    3.34
  -1   4 -17    8.14    1.37
  -1   4 -17    8.34    2.06
   1  -4  17   10.01    1.18
   1  -4  17   10.30    2.65
  -1   4 -18    4.32    3.83
  -1   4 -18    5.59    3.34
   1  -4  18    8.05    2.55
   1  -4  18    4.91    3.04
  -1   4 -18    8.24    1.96
  -1   4 -18    8.64    1.37
   1  -4  18    5.50    0.98
   1  -4  18    6.08    2.55
  -1   4 -19    2.85    3.14
  -1   4 -19   -0.59    3.24
   1  -4  19    4.71    2.85
   1  -4  19   -1.67    2.75
  -1   4 -19    0.59    1.18
  -1   4 -19   -0.29    1.57
   1  -4  19    2.75    1.67
   1  -4  19    1.08    0.88
  -1   3  21    1.67    3.04
   1  -3 -21    1.18    2.85
   1  -3 -21    5.10    3.24
   1  -3 -21   -0.59    2.06
  -1   3  20    3.73    2.65
  -1   3  20    5.00    3.53
   1  -3 -20    4.51    4.22
   1  -3 -20   -3.43    3.73
  -1   3  20   -3.34    2.85
  -1   3  20    4.12    1.96
   1  -3 -20    4.51    1.77
   1  -3 -20   -0.49    3.63
  -1   3  19    0.10    3.83
  -1   3  19    3.83    2.26
   1  -3 -19   -5.89    3.93
   1  -3 -19   -0.59    3.73
  -1   3  19    0.20    2.94
  -1   3  19    2.94    1.86
   1  -3 -19    2.55    1.77
   1  -3 -19    5.50    3.73
  -1   3  18   -1.47    1.96
  -1   3  18    0.49    4.22
   1  -3 -18    1.37    3.24
   1  -3 -18   -0.20    3.73
  -1   3  18   -1.77    1.96
  -1   3  18    0.10    3.14
   1  -3 -18    1.08    1.67
   1  -3 -18   -0.29    4.32
  -1   3  17   13.74    3.43
  -1   3  17    8.83    2.26
   1  -3 -17    6.87    4.32
   1  -3 -17    6.77    1.86
  -1   3  16    7.65    3.83
  -1   3  16   12.66    2.16
   1  -3 -16    8.64    3.63
   1  -3 -16    7.65    2.65
  -1   3  16   12.27    3.43
  -1   3  16   10.79    2.26
   1  -3 -16    9.91    1.96
   1  -3 -16    7.07    4.61
  -1   3  15    2.26    1.86
  -1   3  15    0.10    3.43
   1  -3 -15    5.99    2.26
   1  -3 -15    5.30    3.34
  -1   3  15   -3.24    3.24
  -1   3  15   -0.59    2.06
   1  -3 -15    0.29    1.67
   1  -3 -15   -0.39    4.51
  -1   3  14   36.21    2.65
  -1   3  14   39.15    4.12
   1  -3 -14   38.66    2.94
   1  -3 -14   34.83    3.93
  -1   3  14   33.95    3.93
  -1   3  14   31.89    2.65
   1  -3 -14   41.02    5.10
   1  -3 -14   36.31    2.55
  -1   3  13   21.29    2.16
  -1   3  13   25.32    3.83
   1  -3 -13   21.39    2.45
   1  -3 -13   25.61    3.53
  -1   3  13   25.12    3.53
  -1   3  13   26.40    2.45
   1  -3 -13   21.29    2.06
   1  -3 -13   22.37    4.32
  -1   3  12   -2.65    1.67
  -1   3  12    0.00    3.34
   1  -3 -12   -1.67    1.96
   1  -3 -12   -1.86    2.85
  -1   3  12    5.89    3.14
  -1   3  12    2.65    1.86
   1  -3 -12   -1.28    1.67
   1  -3 -12   -2.45    3.93
  -1   3  11   29.54    2.36
  -1   3  11   32.28    3.93
   1  -3 -11   34.44    2.65
   1  -3 -11   32.09    3.53
  -1   3  11   34.34    3.73
  -1   3  11   24.04    2.45
   1  -3 -11   30.22    2.26
  -1   3  10  136.49    5.69
  -1   3  10  141.01    6.77
   1  -3 -10  134.14    5.59
   1  -3 -10  147.19    7.07
   1  -3 -10  119.32    7.07
  -1   3   9   73.50    3.73
  -1   3   9   72.71    4.71
   1  -3  -9   76.24    5.40
   1  -3  -9   70.26    3.53
  -1   3   8  395.84   14.23
  -1   3   8  388.58   14.52
  -1   3   8  401.33   15.90
  -1   3   8  383.77   14.82
   1  -3  -8  390.64   15.80
   1  -3  -8  383.08   14.72
  -1   3   7   14.33    1.86
  -1   3   7   13.54    3.04
   1  -3  -7   14.33    1.96
   1  -3  -7   14.33    3.04
  -1   3   7   14.23    2.65
  -1   3   7   13.44    1.77
   1  -3  -7   14.72    2.94
   1  -3  -7   15.31    1.67
  -1   3   6   60.54    2.94
  -1   3   6   59.17    3.83
   1  -3  -6   63.00    3.14
   1  -3  -6   62.11    3.93
  -1   3   6   60.54    3.04
  -1   3   6   60.45    3.63
   1  -3  -6   62.80    3.04
   1  -3  -6   57.89    3.83
  -1   3   5   10.21    1.86
  -1   3   5   14.72    2.85
  -1   3   5   16.78    1.77
  -1   3   5   18.45    2.55
   1  -3  -5   15.21    1.57
   1  -3  -5   23.55    2.94
  -1   3   4    2.75    2.06
  -1   3   4   -0.88    3.14
   1  -3  -4    5.30    2.16
   1  -3  -4    2.85    3.14
  -1   3   4    4.22    2.26
  -1   3   4    3.73    1.57
   1  -3  -4    4.51    2.65
   1  -3  -4    5.79    1.47
  -1   3   3  688.84   24.24
  -1   3   3  628.99   22.27
   1  -3  -3  651.95   22.96
   1  -3  -3  684.62   24.34
  -1   3   3  643.80   24.53
  -1   3   3  633.79   23.94
   1  -3  -3  634.68   24.24
   1  -3  -3  627.91   23.75
  -1   3   2  177.21    6.87
  -1   3   2  182.42    7.16
   1  -3  -2  170.25    6.57
   1  -3  -2  178.69    7.16
  -1   3   2  188.30    7.36
  -1   3   2  188.01    7.65
   1  -3  -2  178.20    7.46
   1  -3  -2  191.15    7.46
   1  -3  -1  359.63   12.85
   1  -3  -1  387.79   13.93
  -1   3   1  347.27   13.35
  -1   3   1  355.02   13.54
   1  -3  -1  346.68   13.15
   1  -3  -1  362.38   14.03
  -1   3   0 1478.75   51.42
  -1   3   0 1473.85   51.22
   1  -3   0 1539.59   53.48
   1  -3   0 1466.98   51.03
  -1   3   0 1531.74   57.40
  -1   3   0 1472.87   55.15
   1  -3   0 1509.17   56.42
   1  -3   0 1417.92   53.18
  -1   3  -1  819.84   28.75
  -1   3  -1  786.97   27.57
   1  -3   1  811.50   28.46
   1  -3   1  797.86   27.87
  -1   3  -1  764.30   28.75
  -1   3  -1  783.34   29.44
   1  -3   1  782.85   29.34
   1  -3   1  805.32   30.32
  -1   3  -2  385.93   13.84
  -1   3  -2  364.14   12.95
   1  -3   2  363.26   13.15
   1  -3   2  379.16   13.54
  -1   3  -2  380.04   14.33
  -1   3  -2  389.46   14.72
   1  -3   2  380.63   14.42
   1  -3   2  374.15   14.23
  -1   3  -3   29.14    2.26
  -1   3  -3   29.05    2.06
   1  -3   3   30.32    2.55
   1  -3   3   28.06    1.96
  -1   3  -3   28.75    1.57
  -1   3  -3   27.38    1.47
   1  -3   3   32.19    1.77
   1  -3   3   27.38    1.57
  -1   3  -4    1.08    1.96
  -1   3  -4    2.36    1.47
   1  -3   4    3.04    2.06
   1  -3   4    3.43    1.47
  -1   3  -4   -0.29    0.79
  -1   3  -4    0.20    0.88
   1  -3   4   -0.49    1.18
   1  -3   4   -0.59    0.88
  -1   3  -5  202.14    7.46
  -1   3  -5  205.08    7.95
   1  -3   5  200.86    7.75
   1  -3   5  205.18    7.65
   1  -3   5  207.54    7.95
   1  -3   5  192.52    7.56
  -1   3  -6  202.73    7.56
  -1   3  -6  207.05    8.14
   1  -3   6  217.35    8.44
   1  -3   6  204.49    7.65
  -1   3  -6  209.01    8.14
  -1   3  -6  205.08    7.95
   1  -3   6  207.34    7.95
   1  -3   6  205.67    8.24
  -1   3  -7   13.54    1.37
  -1   3  -7   12.46    1.37
   1  -3   7   17.66    2.55
   1  -3   7   16.49    1.18
  -1   3  -8  177.80    6.87
  -1   3  -8  176.82    7.46
   1  -3   8  182.12    7.56
   1  -3   8  177.80    6.97
  -1   3  -8  187.03    7.36
  -1   3  -9   12.95    1.77
  -1   3  -9   11.97    2.65
   1  -3   9   13.05    1.86
   1  -3   9   11.78    2.45
   1  -3   9   12.85    1.37
   1  -3   9   11.78    3.04
  -1   3 -10   27.87    2.94
  -1   3 -10   25.22    2.06
   1  -3  10   27.77    2.16
   1  -3  10   28.26    2.85
  -1   3 -10   30.12    2.16
  -1   3 -10   25.51    2.06
   1  -3  10   26.49    3.63
   1  -3  10   24.04    1.57
  -1   3 -11   75.75    3.63
  -1   3 -11   64.17    4.02
   1  -3  11   67.61    4.12
  -1   3 -11   72.32    3.53
  -1   3 -11   70.06    3.43
   1  -3  11   70.94    3.14
   1  -3  11   70.55    4.91
  -1   3 -12   13.74    2.55
  -1   3 -12    9.71    1.77
   1  -3  12   11.68    2.55
   1  -3  12   12.95    1.86
  -1   3 -12    9.52    1.96
  -1   3 -12   11.09    1.86
   1  -3  12   13.93    1.37
   1  -3  12    9.81    3.73
  -1   3 -13    0.29    1.67
  -1   3 -13    1.57    2.45
   1  -3  13    0.29    2.65
   1  -3  13    0.98    1.57
  -1   3 -13   -1.86    1.77
  -1   3 -13   -0.79    1.77
   1  -3  13    0.79    3.53
   1  -3  13    3.93    1.18
  -1   3 -14    6.18    1.96
  -1   3 -14    5.30    2.94
   1  -3  14    4.81    2.75
   1  -3  14    1.57    1.57
  -1   3 -14    3.83    1.86
   1  -3  14    1.28    3.83
   1  -3  14    2.85    1.18
  -1   3 -16    1.57    2.45
  -1   3 -16    0.39    3.04
   1  -3  16   -0.29    3.24
  -1   3 -16   -2.06    1.86
  -1   3 -16    2.65    1.96
   1  -3  16    1.86    3.63
   1  -3  16    2.85    1.18
  -1   3 -17   -2.16    3.43
  -1   3 -17    1.47    2.85
   1  -3  17    0.29    3.04
  -1   3 -17    3.43    2.16
  -1   3 -17    2.94    1.96
   1  -3  17   -0.88    3.04
   1  -3  17    0.29    0.98
  -1   3 -18   28.95    3.93
  -1   3 -18   22.37    4.61
   1  -3  18   33.36    3.04
   1  -3  18   40.53    3.73
  -1   3 -18   37.78    2.94
  -1   3 -18   40.62    2.94
  -1   3 -19    3.04    3.53
  -1   3 -19    1.86    3.24
   1  -3  19    0.88    2.65
   1  -3  19   -0.10    3.14
  -1   3 -19    0.29    1.67
  -1   3 -19   -1.57    1.77
   1  -3  19    0.59    2.06
   1  -3  19   -1.67    0.88
  -1   3 -20   -4.02    3.14
   1  -3  20    3.04    2.65
   1  -3  20   -0.69    2.55
  -1   3 -20    0.10    1.57
  -1   3 -20    1.18    1.77
   1  -3  20    1.08    1.57
   1  -3  20   -0.29    0.98
  -1   2  21   -3.14    3.34
   1  -2 -21    2.26    2.75
   1  -2 -21    2.26    3.24
  -1   2  21    0.49    2.26
  -1   2  21   -0.49    1.67
   1  -2 -21   -0.20    2.36
   1  -2 -21    0.59    1.47
  -1   2  20    0.39    3.53
  -1   2  20    3.43    2.75
   1  -2 -20    1.96    4.02
   1  -2 -20    1.96    3.73
  -1   2  20    3.53    2.94
  -1   2  20    6.38    1.77
   1  -2 -20    2.06    1.67
   1  -2 -20    3.04    3.43
  -1   2  19    6.48    3.73
  -1   2  19    0.00    2.06
   1  -2 -19    0.20    3.63
   1  -2 -19   -2.06    3.73
  -1   2  19   -1.18    1.77
  -1   2  19    6.97    3.14
   1  -2 -19    0.98    1.67
   1  -2 -19    1.96    3.43
   1  -2 -18   39.64    4.51
  -1   2  18   59.66    3.53
  -1   2  18   61.23    4.71
   1  -2 -18   63.49    3.53
   1  -2 -18   62.70    5.59
   1  -2 -17   22.67    2.36
   1  -2 -17   17.37    4.51
  -1   2  16    4.02    1.86
  -1   2  16    5.20    3.63
   1  -2 -16    3.83    2.55
   1  -2 -16    2.85    3.14
  -1   2  16    1.77    2.06
  -1   2  16    2.65    3.43
   1  -2 -16    2.85    1.86
   1  -2 -16    1.08    4.42
  -1   2  15   15.90    3.63
  -1   2  15   15.31    2.06
   1  -2 -15   17.96    2.55
   1  -2 -15   11.68    3.14
  -1   2  15   15.90    2.26
  -1   2  15   11.09    3.43
   1  -2 -15   13.35    1.96
   1  -2 -15   16.29    4.51
  -1   2  14    0.49    1.67
  -1   2  14    3.53    3.24
   1  -2 -14   -0.20    3.04
   1  -2 -14    1.47    2.06
  -1   2  14    6.67    3.24
  -1   2  14    0.98    2.06
   1  -2 -14   -3.14    4.32
   1  -2 -14    0.88    1.67
  -1   2  13   46.81    4.12
  -1   2  13   47.10    2.85
   1  -2 -13   55.93    4.32
   1  -2 -13   46.41    3.04
  -1   2  13   42.78    2.94
  -1   2  13   45.14    4.22
   1  -2 -13   47.20    5.00
   1  -2 -13   48.08    2.85
  -1   2  12  343.93   12.66
  -1   2  12  337.16   13.05
   1  -2 -12  366.40   14.03
   1  -2 -12  355.80   13.05
   1  -2 -12  348.25   13.64
  -1   2  11   66.14    4.61
  -1   2  11   63.88    3.34
   1  -2 -11   66.33    4.32
   1  -2 -11   67.51    3.53
  -1   2  11   59.56    3.34
  -1   2  11   52.69    4.91
   1  -2 -11   57.31    5.10
  -1   2  10   10.60    3.63
  -1   2  10   12.66    1.86
   1  -2 -10   13.25    3.14
   1  -2 -10   18.74    2.26
  -1   2  10   12.76    1.96
  -1   2  10   17.56    3.43
   1  -2 -10   15.11    4.02
   1  -2 -10   11.09    1.77
  -1   2   9   49.36    2.75
   1  -2  -9   46.02    3.63
  -1   2   9   53.67    4.12
  -1   2   9   53.48    3.04
   1  -2  -9   56.72    4.71
   1  -2  -9   56.52    3.04
  -1   2   8    8.93    1.77
  -1   2   8    6.97    2.85
   1  -2  -8    6.08    2.85
   1  -2  -8    3.73    1.67
  -1   2   8    4.12    2.65
  -1   2   8    6.77    1.67
   1  -2  -8    4.42    1.47
   1  -2  -8    4.61    3.24
  -1   2   7  728.09   25.61
  -1   2   7  731.92   26.00
   1  -2  -7  699.24   24.63
   1  -2  -7  748.70   26.69
  -1   2   7  688.84   26.00
  -1   2   7  721.42   27.57
   1  -2  -7  711.02   26.89
   1  -2  -7  718.67   27.57
  -1   2   6  490.82   17.66
  -1   2   6  487.68   17.27
   1  -2  -6  476.40   16.88
   1  -2  -6  506.52   18.25
  -1   2   6  472.28   17.96
  -1   2   6  490.33   18.94
   1  -2  -6  473.16   18.45
   1  -2  -6  469.53   17.86
  -1   2   5  510.25   18.35
  -1   2   5  497.79   17.56
   1  -2  -5  511.04   18.35
   1  -2  -5  502.60   17.76
  -1   2   5  499.36   18.94
  -1   2   5  498.58   19.23
   1  -2  -5  507.60   19.63
   1  -2  -5  500.05   18.94
  -1   2   4   42.88    3.83
  -1   2   4   42.68    2.65
   1  -2  -4   40.82    3.73
   1  -2  -4   47.10    2.94
  -1   2   4   46.51    3.24
  -1   2   4   47.69    2.65
   1  -2  -4   45.33    2.45
   1  -2  -4   41.90    3.43
  -1   2   3   -0.20    3.04
  -1   2   3    3.34    2.06
   1  -2  -3   -1.18    2.94
   1  -2  -3    1.77    2.06
  -1   2   3    0.59    2.06
  -1   2   3   -0.98    1.37
   1  -2  -3    2.06    1.37
   1  -2  -3    2.26    2.26
  -1   2   2 1928.17   66.82
  -1   2   2 2086.15   72.32
   1  -2  -2 2013.54   69.87
   1  -2  -2 2037.09   70.55
  -1   2   2 1919.34   71.73
  -1   2   2 2068.49   77.42
   1  -2  -2 1984.10   74.28
   1  -2  -2 2039.05   76.15
  -1   2   1  329.02   11.58
  -1   2   1  318.12   11.28
   1  -2  -1  307.62   10.89
   1  -2  -1  330.59   11.68
  -1   2   1  317.04   12.07
  -1   2   1  322.64   12.17
   1  -2  -1  321.26   12.17
   1  -2  -1  320.77   12.27
  -1   2   0 1737.80   60.25
  -1   2   0 1830.04   63.39
   1  -2   0 1834.95   63.59
   1  -2   0 1741.73   60.35
  -1   2   0 1748.60   65.35
  -1   2   0 1780.98   66.53
   1  -2   0 1773.13   66.23
   1  -2   0 1783.92   66.73
  -1   2  -1  247.96    8.83
  -1   2  -1  260.92    9.42
   1  -2   1  251.30    9.03
   1  -2   1  260.33    9.32
  -1   2  -1  258.86    9.81
  -1   2  -1  263.57   10.01
   1  -2   1  255.72    9.71
   1  -2   1  250.32    9.52
  -1   2  -2  401.43   14.23
  -1   2  -2  365.42   13.05
   1  -2   2  409.67   14.62
   1  -2   2  373.27   13.25
  -1   2  -2  385.04   14.52
  -1   2  -2  382.10   14.42
   1  -2   2  382.69   14.42
   1  -2   2  412.81   15.60
  -1   2  -3 4283.18  148.27
  -1   2  -3 4695.31  162.59
   1  -2   3 4445.09  153.96
   1  -2   3 4576.58  158.37
  -1   2  -3 4945.53  184.67
  -1   2  -3 4582.47  170.93
   1  -2   3 4472.57  166.91
   1  -2   3 5118.23  190.95
  -1   2  -4  449.71   16.09
  -1   2  -4  428.51   15.21
   1  -2   4  448.73   15.90
   1  -2   4  450.89   16.19
  -1   2  -4  435.97   16.49
  -1   2  -4  441.76   16.68
  -1   2  -5  206.95    7.95
  -1   2  -5  215.48    7.85
   1  -2   5  211.36    8.05
   1  -2   5  203.81    7.56
   1  -2   5  211.07    8.44
   1  -2   5  206.46    7.95
  -1   2  -6  238.15    9.03
  -1   2  -6  241.09    8.83
   1  -2   6  231.58    8.54
   1  -2   6  244.14    9.32
  -1   2  -6  240.51    9.32
  -1   2  -6  226.96    8.73
   1  -2   6  234.72    9.42
   1  -2   6  225.39    8.64
  -1   2  -7  149.25    6.18
  -1   2  -7  157.59    6.08
   1  -2   7  160.83    6.67
   1  -2   7  153.86    5.89
  -1   2  -7  145.03    5.79
  -1   2  -7  149.25    6.08
   1  -2   7  138.06    6.18
   1  -2   7  150.13    5.89
  -1   2  -8   11.68    1.77
  -1   2  -8    8.54    1.67
   1  -2   8   11.19    1.18
   1  -2   8    6.67    3.34
  -1   2  -9  217.74    8.83
  -1   2  -9  206.55    7.85
   1  -2   9  215.58    8.73
   1  -2   9  214.70    8.14
  -1   2  -9  195.56    7.85
  -1   2  -9  216.27    8.54
   1  -2   9  204.98    7.95
   1  -2   9  202.73    8.93
  -1   2 -10   88.21    4.71
  -1   2 -10   86.94    3.93
   1  -2  10   81.54    4.42
   1  -2  10   84.39    3.83
  -1   2 -10   74.58    3.53
  -1   2 -10   76.34    3.73
   1  -2  10   73.99    3.34
   1  -2  10   72.32    4.91
  -1   2 -11   20.31    2.75
  -1   2 -11   20.12    1.96
   1  -2  11   19.63    1.86
   1  -2  11   21.78    2.94
  -1   2 -11   17.47    2.06
  -1   2 -11   17.17    1.96
   1  -2  11   20.41    1.57
   1  -2  11   20.12    3.63
  -1   2 -12   52.50    3.73
  -1   2 -12   53.87    2.94
   1  -2  12   54.75    3.83
   1  -2  12   52.89    2.94
  -1   2 -12   50.44    2.94
  -1   2 -12   48.67    3.04
   1  -2  12   51.42    2.55
   1  -2  12   51.42    4.42
  -1   2 -13    1.67    2.55
  -1   2 -13    3.93    1.77
   1  -2  13    2.16    2.55
   1  -2  13    1.77    1.57
  -1   2 -13    3.24    1.96
  -1   2 -13    0.49    1.86
   1  -2  13    2.75    3.63
   1  -2  13    2.16    1.28
  -1   2 -14   10.79    1.96
  -1   2 -14   10.01    2.94
   1  -2  14    9.62    2.94
   1  -2  14    8.93    1.77
  -1   2 -15   96.75    4.71
  -1   2 -15  100.97    5.89
   1  -2  15   91.85    4.42
   1  -2  15  102.35    5.59
  -1   2 -15   91.55    4.61
   1  -2  15   93.71    6.48
   1  -2  15  100.87    4.42
  -1   2 -16    5.89    2.36
  -1   2 -16   -1.08    3.24
   1  -2  16    2.36    1.77
   1  -2  16    4.22    3.24
  -1   2 -16    6.67    2.16
  -1   2 -16    0.10    2.06
   1  -2  16    5.10    1.28
   1  -2  16    5.69    4.02
  -1   2 -17    5.00    2.65
  -1   2 -17    5.59    3.34
   1  -2  17    4.81    1.86
   1  -2  17    7.65    3.24
  -1   2 -17    4.32    2.06
  -1   2 -17    0.39    2.06
   1  -2  17    4.51    1.18
   1  -2  17    1.96    3.14
  -1   2 -18   11.58    3.34
  -1   2 -18    5.40    3.83
   1  -2  18   11.19    2.16
   1  -2  18    7.85    2.94
  -1   2 -18    7.56    2.06
  -1   2 -18    6.67    2.16
   1  -2  18   10.70    1.28
   1  -2  18    6.48    3.34
  -1   2 -19    1.47    3.63
  -1   2 -19    2.75    3.53
   1  -2  19    5.79    3.34
   1  -2  19    1.86    2.36
  -1   2 -19    3.04    1.86
  -1   2 -19    2.94    1.86
   1  -2  19    5.30    1.08
   1  -2  19    1.57    2.65
  -1   2 -20   -0.10    2.75
  -1   2 -20    3.53    3.43
   1  -2  20   -1.37    3.24
   1  -2  20    0.88    3.04
  -1   2 -20    0.29    1.96
  -1   2 -20    1.18    1.57
   1  -2  20    0.98    0.98
   1  -2  20    1.57    1.77
   1  -1 -21   -8.24    3.34
   1  -1 -21   -1.57    2.65
  -1   1  21    1.18    2.26
  -1   1  21    3.43    1.57
   1  -1 -21    0.88    1.57
   1  -1 -21   -4.91    2.45
  -1   1  20   -0.29    2.65
  -1   1  20   -1.67    3.53
   1  -1 -20    1.57    4.12
   1  -1 -20    2.16    3.73
  -1   1  20    1.47    2.75
  -1   1  20   -1.47    1.47
   1  -1 -20    0.79    1.57
   1  -1 -20   -0.49    3.53
  -1   1  19    8.83    2.26
  -1   1  19    1.86    3.43
   1  -1 -19    6.77    3.83
   1  -1 -19   15.21    4.02
  -1   1  19    4.42    1.67
  -1   1  19    6.38    3.24
   1  -1 -19    1.08    3.53
   1  -1 -19    6.28    1.77
  -1   1  18   49.65    3.24
  -1   1  18   47.98    4.91
   1  -1 -18   38.47    4.51
  -1   1  18   38.27    2.75
  -1   1  18   42.19    4.12
   1  -1 -18   40.13    2.85
   1  -1 -18   31.40    4.71
  -1   1  17   32.87    2.65
  -1   1  17   28.85    4.02
   1  -1 -17   31.01    2.65
   1  -1 -17   27.57    4.51
  -1   1  16    8.34    3.73
  -1   1  16    4.02    1.77
   1  -1 -16    3.24    3.14
   1  -1 -16    8.64    2.75
  -1   1  16    6.97    2.16
  -1   1  16    4.91    3.53
   1  -1 -16    4.22    4.42
   1  -1 -16    2.65    1.96
  -1   1  15   43.08    4.22
  -1   1  15   38.27    2.65
   1  -1 -15   43.57    3.24
   1  -1 -15   36.50    3.83
  -1   1  15   41.61    2.94
  -1   1  15   38.47    4.61
   1  -1 -15   35.03    2.55
   1  -1 -15   39.84    4.91
  -1   1  14   22.08    2.06
  -1   1  14   26.20    3.83
   1  -1 -14   25.32    3.43
   1  -1 -14   24.63    2.55
  -1   1  14   18.64    2.26
  -1   1  14   19.63    3.63
   1  -1 -14   18.15    1.96
   1  -1 -14   18.45    4.51
  -1   1  13  114.51    6.08
  -1   1  13  110.59    4.81
   1  -1 -13  107.94    5.69
   1  -1 -13  120.60    5.30
  -1   1  12  558.63   20.02
  -1   1  12  564.91   20.80
   1  -1 -12  571.58   20.41
   1  -1 -12  586.59   21.49
  -1   1  12  547.84   21.78
   1  -1 -12  558.73   21.39
   1  -1 -12  604.85   24.04
  -1   1  11   80.27    5.00
  -1   1  11   83.31    3.93
   1  -1 -11   85.37    4.12
   1  -1 -11   80.46    4.71
  -1   1  11   74.77    3.73
  -1   1  11   74.87    4.91
   1  -1 -11   73.59    3.63
   1  -1 -11   69.37    5.30
  -1   1  10 1780.98   62.02
  -1   1  10 1774.11   62.21
   1  -1 -10 1765.28   61.92
   1  -1 -10 1782.94   62.11
  -1   1   9   42.78    2.55
  -1   1   9   38.96    3.83
   1  -1  -9   34.34    2.55
   1  -1  -9   37.48    3.34
  -1   1   9   44.94    3.83
  -1   1   9   39.35    2.55
   1  -1  -9   45.92    4.22
   1  -1  -9   43.86    2.55
  -1   1   8  115.30    4.61
  -1   1   8  113.43    5.40
   1  -1  -8  113.24    5.20
   1  -1  -8  116.18    4.71
  -1   1   8  121.87    5.79
  -1   1   8  123.15    5.20
   1  -1  -8  116.67    5.99
   1  -1  -8  119.32    5.00
  -1   1   7  150.23    6.38
  -1   1   7  139.63    5.40
   1  -1  -7  145.81    5.59
   1  -1  -7  143.66    5.99
  -1   1   7  147.68    6.48
  -1   1   7  151.90    6.18
   1  -1  -7  153.96    6.18
   1  -1  -7  155.92    7.07
  -1   1   6 1483.66   51.61
  -1   1   6 1467.96   51.22
   1  -1  -6 1463.05   50.93
   1  -1  -6 1506.23   52.60
  -1   1   6 1505.25   56.62
  -1   1   6 1447.35   54.26
   1  -1  -6 1453.24   54.46
   1  -1  -6 1541.55   58.09
  -1   1   5   46.71    2.45
  -1   1   5   42.88    3.53
   1  -1  -5   49.16    3.53
   1  -1  -5   48.96    2.65
  -1   1   5   49.36    3.34
  -1   1   5   47.39    2.55
   1  -1  -5   45.04    3.43
   1  -1  -5   45.43    2.45
   1  -1  -4   71.53    4.12
   1  -1  -4   78.30    3.43
  -1   1   4   68.59    3.73
  -1   1   4   72.02    3.24
   1  -1  -4   74.28    3.34
   1  -1  -4   67.90    3.93
  -1   1   3    0.79    2.06
  -1   1   3   -0.59    1.18
   1  -1  -3   -3.73    2.06
   1  -1  -3    0.88    1.28
  -1   1   3    0.49    1.08
  -1   1   3   -0.20    1.57
   1  -1  -3    3.04    1.77
   1  -1  -3    0.00    0.98
  -1   1   2    4.02    1.28
  -1   1   2    3.53    0.88
  -1   1   2    4.61    1.08
  -1   1   2    6.67    0.79
   1  -1  -2    6.57    1.18
   1  -1  -2    6.48    0.79
  -1   1   1  680.60   23.65
  -1   1   1  699.44   24.34
   1  -1  -1  667.74   23.16
   1  -1  -1  681.48   23.65
  -1   1   1  652.54   24.43
  -1   1   1  677.95   25.41
   1  -1  -1  676.87   25.32
   1  -1  -1  651.06   24.43
  -1   1   0   84.58    3.14
  -1   1   0   82.13    3.04
   1  -1   0   84.19    3.14
   1  -1   0   80.76    2.94
  -1   1   0   82.23    3.24
  -1   1   0   81.64    3.14
   1  -1   0   81.74    3.24
   1  -1   0   82.72    3.24
  -1   1  -1 1460.11   50.63
  -1   1  -1 1575.90   54.56
   1  -1   1 1618.09   56.13
   1  -1   1 1514.08   52.50
  -1   1  -1 1547.44   57.80
  -1   1  -1 1534.68   57.31
   1  -1   1 1641.64   61.33
   1  -1   1 1487.58   55.54
  -1   1  -2  306.54   10.79
  -1   1  -2  320.28   11.38
   1  -1   2  296.83   10.60
   1  -1   2  317.53   11.19
  -1   1  -2  310.08   11.68
  -1   1  -2  288.29   10.89
   1  -1   2  326.76   12.36
   1  -1   2  312.53   11.78
  -1   1  -3  783.43   27.28
  -1   1  -3  779.90   27.38
   1  -1   3  788.83   27.67
   1  -1   3  784.02   27.38
  -1   1  -3  793.35   29.83
  -1   1  -3  789.62   29.63
   1  -1   3  756.55   28.46
   1  -1   3  768.42   28.75
  -1   1  -4 1725.05   60.05
  -1   1  -4 1708.37   59.37
   1  -1   4 1741.73   60.64
   1  -1   4 1704.44   59.17
  -1   1  -4 1587.67   59.46
  -1   1  -4 1723.09   64.47
   1  -1   4 1737.80   64.96
   1  -1   4 1770.19   66.33
  -1   1  -5  227.85    8.34
  -1   1  -5  234.13    8.83
   1  -1   5  228.34    8.34
   1  -1   5  235.70    8.93
  -1   1  -5  229.71    9.03
  -1   1  -5  227.75    8.73
   1  -1   5  226.67    8.73
   1  -1   5  218.53    8.83
  -1   1  -6  436.66   15.80
  -1   1  -6  433.62   15.41
   1  -1   6  435.78   15.80
   1  -1   6  429.40   15.21
  -1   1  -6  427.53   16.19
  -1   1  -6  445.88   17.07
   1  -1   6  428.81   16.19
   1  -1   6  434.79   16.88
  -1   1  -7  699.73   24.63
  -1   1  -7  709.55   25.32
   1  -1   7  699.05   24.63
   1  -1   7  703.17   25.12
  -1   1  -7  694.34   26.20
  -1   1  -7  696.59   26.49
   1  -1   7  658.03   24.83
   1  -1   7  702.48   26.89
  -1   1  -8   70.75    3.93
   1  -1   8   72.51    3.34
  -1   1  -8   85.57    3.83
  -1   1  -8   84.09    4.32
   1  -1   8   84.00    4.91
   1  -1   8   81.54    3.53
  -1   1  -9   25.71    2.85
  -1   1  -9   23.16    2.06
   1  -1   9   22.77    1.96
   1  -1   9   25.02    3.14
  -1   1  -9   19.13    2.06
  -1   1  -9   23.35    2.75
   1  -1   9   25.02    3.73
   1  -1   9   19.72    1.57
  -1   1 -10  482.09   17.27
  -1   1 -10  513.00   18.84
   1  -1  10  478.95   17.17
   1  -1  10  503.68   18.55
  -1   1 -10  491.22   18.74
  -1   1 -10  532.04   20.70
   1  -1  10  527.72   20.02
   1  -1  10  489.25   19.43
  -1   1 -11  292.12   10.79
  -1   1 -11  294.97   11.48
   1  -1  11  293.79   10.89
   1  -1  11  290.94   11.38
  -1   1 -11  318.61   12.46
  -1   1 -11  322.44   13.05
   1  -1  11  310.76   12.07
   1  -1  11  305.86   12.85
  -1   1 -12  191.74    8.14
  -1   1 -12  189.97    7.36
   1  -1  12  192.62    7.46
   1  -1  12  191.34    8.14
  -1   1 -12  192.42    7.85
  -1   1 -12  193.90    8.54
   1  -1  12  183.69    8.83
   1  -1  12  198.80    7.95
  -1   1 -13  278.19   10.40
  -1   1 -13  288.39   11.48
   1  -1  13  273.67   10.89
   1  -1  13  274.65   10.30
  -1   1 -13  297.42   12.36
   1  -1  13  282.60   11.19
  -1   1 -14    2.75    2.75
  -1   1 -14    3.43    1.77
   1  -1  14    7.85    2.85
   1  -1  14    3.73    1.67
  -1   1 -14    5.69    1.96
   1  -1  14    6.28    4.02
  -1   1 -15   16.19    2.26
  -1   1 -15   10.99    3.24
   1  -1  15   15.50    2.06
   1  -1  15   16.68    3.14
  -1   1 -15   17.96    3.14
  -1   1 -15   15.90    2.26
   1  -1  15   17.47    1.77
   1  -1  15   11.48    4.32
  -1   1 -16   68.59    4.51
  -1   1 -16   72.32    4.71
  -1   1 -16   71.63    4.02
   1  -1  16   70.65    5.89
   1  -1  16   74.77    3.63
  -1   1 -17    1.96    2.94
  -1   1 -17    6.18    3.34
   1  -1  17    6.87    3.73
   1  -1  17    6.97    1.86
  -1   1 -17   11.38    2.16
  -1   1 -17    5.40    2.85
   1  -1  17    4.51    1.37
   1  -1  17    9.03    3.63
  -1   1 -18   87.33    4.42
  -1   1 -18   90.57    5.20
  -1   1 -19   -0.79    3.53
  -1   1 -19   -0.69    3.73
   1  -1  19    6.08    3.14
   1  -1  19   -0.59    2.16
  -1   1 -19    0.29    2.36
  -1   1 -19    4.42    1.86
   1  -1  19   -3.63    2.85
   1  -1  19    1.57    1.08
  -1   1 -20    2.85    3.53
  -1   1 -20    4.71    3.53
   1  -1  20    5.10    3.04
   1  -1  20    2.06    3.53
  -1   1 -20    2.36    1.67
  -1   1 -20    3.53    2.26
   1  -1  20    1.37    1.08
   1  -1  20    2.16    1.86
  -1   0  21   -3.53    3.24
  -1   0  21    3.83    3.24
   1   0 -21    2.65    3.53
   1   0 -21   -1.86    2.55
  -1   0  21    2.26    2.06
  -1   0  21   -0.29    1.37
   1   0 -21   -0.20    1.37
   1   0 -21    3.14    2.06
  -1   0  20   -2.36    2.65
   1   0 -20   -2.75    3.43
   1   0 -20   -6.48    4.02
  -1   0  20    3.04    2.75
  -1   0  20    0.00    1.37
   1   0 -20    2.36    1.57
   1   0 -20    2.16    3.14
  -1   0  19    0.79    2.16
  -1   0  19    3.63    3.53
   1   0 -19    3.63    3.53
   1   0 -19    7.65    4.02
  -1   0  19    2.85    3.24
  -1   0  19    3.63    1.47
   1   0 -19   -0.69    3.53
   1   0 -19    4.02    1.77
  -1   0  18   21.20    2.45
  -1   0  18   22.37    4.02
   1   0 -18   31.01    4.12
   1   0 -18   34.54    4.22
  -1   0  18   24.83    2.06
  -1   0  18   21.00    3.73
   1   0 -18   23.84    4.22
   1   0 -18   21.98    2.26
  -1   0  17   25.91    2.16
  -1   0  17   21.00    3.83
   1   0 -17   18.45    4.12
   1   0 -17   25.22    2.45
  -1   0  16   21.29    2.26
  -1   0  16   19.13    3.93
   1   0 -16   18.06    3.63
   1   0 -16   22.08    3.04
  -1   0  16   20.70    2.06
  -1   0  16   18.45    3.93
   1   0 -16   19.04    2.26
   1   0 -16   16.09    4.12
  -1   0  15   61.33    3.34
  -1   0  15   64.37    4.81
   1   0 -15   56.23    4.32
   1   0 -15   67.51    3.93
  -1   0  15   55.64    3.14
  -1   0  15   60.84    4.71
   1   0 -15   46.71    5.10
   1   0 -15   53.28    3.14
  -1   0  14   -1.47    3.14
  -1   0  14    0.79    1.57
   1   0 -14   -1.18    2.06
   1   0 -14    3.04    2.75
  -1   0  13   22.18    3.53
  -1   0  13   20.51    1.96
   1   0 -13   19.33    2.26
   1   0 -13   18.84    3.04
  -1   0  13   20.70    2.16
  -1   0  13   22.08    3.53
   1   0 -13   25.51    4.32
   1   0 -13   17.17    1.96
  -1   0  12    4.32    3.04
  -1   0  12    4.12    1.57
   1   0 -12    5.40    1.86
   1   0 -12    1.77    2.55
  -1   0  12    4.81    3.14
  -1   0  12    1.67    1.77
   1   0 -12    6.38    1.57
   1   0 -12    2.36    3.73
  -1   0  11  251.69    9.42
  -1   0  11  250.12   10.11
   1   0 -11  255.03   10.11
   1   0 -11  257.29    9.62
   1   0 -11  242.08    9.52
   1   0 -11  240.31   10.50
  -1   0  10   94.20    5.30
  -1   0  10   84.29    3.83
  -1   0  10   81.84    3.93
  -1   0  10   87.43    5.00
   1   0 -10   87.82    5.40
   1   0 -10   94.00    4.22
  -1   0   9  286.33   11.19
  -1   0   9  287.12   10.50
   1   0  -9  291.53   11.19
   1   0  -9  273.57   10.11
  -1   0   9  292.02   11.97
  -1   0   9  270.73   10.60
  -1   0   8  111.77    5.30
  -1   0   8  113.14    4.51
   1   0  -8  109.80    5.00
   1   0  -8  116.08    4.71
  -1   0   8  113.83    5.40
  -1   0   8  111.86    4.71
   1   0  -8  115.49    4.81
   1   0  -8  105.39    5.40
  -1   0   7 1494.45   52.01
  -1   0   7 1506.23   52.69
   1   0  -7 1470.90   51.22
   1   0  -7 1503.28   52.60
  -1   0   7 1522.91   57.01
  -1   0   7 1584.73   59.56
   1   0  -7 1553.33   58.19
   1   0  -7 1591.60   59.95
  -1   0   6 1789.81   62.11
  -1   0   6 1805.51   62.90
   1   0  -6 1754.49   60.94
   1   0  -6 1817.29   63.29
  -1   0   6 1801.59   67.41
  -1   0   6 1879.11   70.45
   1   0  -6 1836.91   68.69
   1   0  -6 1862.42   69.96
  -1   0   5  116.57    5.20
  -1   0   5  118.24    4.61
   1   0  -5  116.87    5.10
   1   0  -5  119.03    4.61
  -1   0   5  125.21    5.10
  -1   0   5  119.03    5.30
   1   0  -5  111.47    5.30
   1   0  -5  121.97    4.91
  -1   0   4 1461.09   50.73
  -1   0   4 1520.95   52.99
   1   0  -4 1478.75   51.32
   1   0  -4 1522.91   52.99
  -1   0   4 1522.91   56.91
  -1   0   4 1570.01   58.78
   1   0  -4 1562.16   58.38
   1   0  -4 1526.83   57.21
  -1   0   3   38.47    1.77
  -1   0   3   38.17    2.26
   1   0  -3   39.74    1.77
   1   0  -3   37.58    2.06
  -1   0   3   42.29    2.16
  -1   0   3   39.15    1.77
  -1   0   2  427.14   14.92
  -1   0   2  417.13   14.62
   1   0  -2  408.99   14.23
   1   0  -2  415.66   14.52
  -1   0   2  390.15   14.62
  -1   0   2  427.93   16.09
   1   0  -2  427.93   15.99
   1   0  -2  419.49   15.80
  -1   0   1  722.70   25.02
  -1   0   1  698.26   24.24
   1   0  -1  701.50   24.34
   1   0  -1  742.12   25.71
  -1   0   1  718.87   26.89
  -1   0   1  722.20   26.98
   1   0  -1  738.20   27.57
   1   0  -1  748.70   27.97
   1   0   0  616.72   21.39
   1   0   0  596.01   20.61
  -1   0   0  641.25   23.94
  -1   0   0  611.91   22.86
   1   0   0  620.55   23.26
   1   0   0  598.76   22.37
  -1   0  -1   30.03    1.18
  -1   0  -1   31.69    1.37
   1   0   1   28.65    1.18
   1   0   1   29.83    1.28
  -1   0  -1   31.40    1.28
  -1   0  -1   29.44    1.37
   1   0   1   30.91    1.28
   1   0   1   29.73    1.37
  -1   0  -2 2414.87   83.60
  -1   0  -2 2416.83   83.70
   1   0   2 2425.67   83.90
   1   0   2 2407.02   83.41
  -1   0  -2 2399.17   89.59
  -1   0  -2 2330.48   87.04
   1   0   2 2373.66   88.71
   1   0   2 2346.18   87.53
  -1   0  -3  241.78    8.64
  -1   0  -3  238.45    8.73
   1   0   3  239.92    8.54
   1   0   3  237.27    8.64
  -1   0  -3  241.29    9.42
  -1   0  -3  242.86    9.22
   1   0   3  238.05    9.32
   1   0   3  236.38    9.03
  -1   0  -4 2714.15   94.10
  -1   0  -4 2706.30   94.00
   1   0   4 2696.49   93.42
   1   0   4 2707.29   94.00
  -1   0  -4 2637.62   98.71
  -1   0  -4 2686.68  100.28
   1   0   4 2661.17   99.60
   1   0   4 2667.05   99.60
  -1   0  -5  714.16   25.02
  -1   0  -5  709.45   25.12
   1   0   5  704.25   24.73
   1   0   5  709.25   25.12
  -1   0  -5  722.11   27.18
  -1   0  -5  704.05   26.79
   1   0   5  702.38   26.40
   1   0   5  704.05   26.89
  -1   0  -6  663.23   23.26
  -1   0  -6  672.75   23.94
   1   0   6  667.94   23.45
   1   0   6  672.95   23.94
  -1   0  -6  648.41   24.53
  -1   0  -6  659.01   25.12
   1   0   6  660.78   25.32
   1   0   6  667.16   25.12
  -1   0  -7  902.95   31.60
  -1   0  -7  948.78   33.56
   1   0   7  918.26   32.19
   1   0   7  924.15   32.68
  -1   0  -7  926.99   35.23
  -1   0  -7  909.53   34.25
   1   0   7  914.92   34.44
   1   0   7  908.15   34.54
  -1   0  -8  946.81   33.17
  -1   0  -8 1005.79   35.62
   1   0   8  978.02   34.64
   1   0   8  967.52   33.95
  -1   0  -8  952.80   36.21
  -1   0  -8  992.05   37.39
   1   0   8  957.71   36.01
   1   0   8  952.11   36.31
  -1   0  -9  232.85    8.73
   1   0   9  229.81    9.22
  -1   0  -9  239.92    9.52
  -1   0  -9  233.74    9.91
   1   0   9  229.91    9.03
   1   0   9  230.10   10.11
  -1   0 -10   89.39    4.81
  -1   0 -10   79.87    3.63
   1   0  10   81.93    3.73
   1   0  10   82.72    4.71
  -1   0 -10   76.34    3.73
  -1   0 -10   78.50    4.71
   1   0  10   85.27    5.30
   1   0  10   79.97    3.73
  -1   0 -11   96.16    4.22
  -1   0 -11  107.64    5.40
   1   0  11  107.15    4.61
   1   0  11   93.22    4.91
  -1   0 -11  100.38    4.61
  -1   0 -11  102.44    5.59
   1   0  11   98.91    5.89
   1   0  11  100.87    4.42
  -1   0 -12   21.29    2.06
  -1   0 -12   18.15    2.94
   1   0  12   22.57    3.04
   1   0  12   19.92    1.96
  -1   0 -12   16.78    2.36
  -1   0 -12   24.24    3.53
   1   0  12   16.58    3.93
   1   0  12   20.02    1.86
  -1   0 -13  643.61   23.55
  -1   0 -13  598.47   21.39
   1   0  13  595.92   21.88
   1   0  13  606.91   21.69
  -1   0 -13  578.94   22.37
  -1   0 -14    0.10    1.86
  -1   0 -14   -3.04    2.75
   1   0  14   -0.29    1.67
   1   0  14   -1.28    3.14
  -1   0 -14    0.39    3.34
  -1   0 -14   -2.26    1.86
   1   0  14   -6.67    3.93
   1   0  14   -0.39    1.57
  -1   0 -15  180.45    7.36
  -1   0 -15  180.45    8.44
   1   0  15  188.89    7.56
   1   0  15  191.84    8.54
  -1   0 -15  197.82    8.34
  -1   0 -15  194.68    9.22
   1   0  15  195.17    8.05
   1   0  15  176.72    9.13
  -1   0 -16    2.36    3.53
  -1   0 -16    1.57    3.34
  -1   0 -16   -0.79    2.16
   1   0  16    4.22    4.22
   1   0  16    2.36    1.57
  -1   0 -17   21.69    3.83
  -1   0 -17   22.67    3.24
   1   0  17   25.22    2.45
   1   0  17   26.30    4.22
  -1   0 -17   28.36    3.73
  -1   0 -17   29.63    2.65
   1   0  17   28.26    4.12
   1   0  17   27.28    2.16
  -1   0 -18   39.05    4.12
  -1   0 -18   27.77    4.42
   1   0  18   36.99    2.94
   1   0  18   35.62    4.12
  -1   0 -18   40.53    2.85
  -1   0 -18   35.62    4.02
  -1   0 -20   -1.47    3.73
  -1   0 -20   -5.99    3.83
   1   0  20    3.93    3.63
   1   0  20    2.45    2.75
  -1   0 -20    0.98    2.55
  -1   0 -20    4.61    1.86
   1   0  20    3.53    2.26
   1   0  20    2.75    1.28
  -1   0 -21    1.18    2.85
  -1   0 -21    4.42    3.53
   1   0  21    2.55    3.43
   1   0  21    5.10    3.34
  -1   0 -21    3.24    2.06
  -1   0 -21    5.79    1.96
  -1  -1  21   -0.29    3.14
  -1  -1  21   -2.06    2.94
   1   1 -21    0.69    2.45
   1   1 -21    7.85    3.63
  -1  -1  21    3.24    2.16
  -1  -1  21    1.08    1.28
   1   1 -21    0.39    1.77
   1   1 -21    2.06    1.37
  -1  -1  20    3.04    3.34
   1   1 -20    0.98    3.83
   1   1 -20    2.06    3.53
  -1  -1  20    5.79    2.45
  -1  -1  20    5.40    1.28
   1   1 -20    2.06    2.26
   1   1 -20    2.94    1.47
  -1  -1  19    2.36    3.43
  -1  -1  19    7.56    2.36
   1   1 -19    6.87    3.43
   1   1 -19    9.22    3.93
  -1  -1  19    5.79    3.14
  -1  -1  19    6.57    1.37
   1   1 -19    0.69    2.94
   1   1 -19    9.62    1.96
  -1  -1  18   25.51    3.93
  -1  -1  18   27.77    2.75
   1   1 -18   28.55    4.22
   1   1 -18   29.54    4.02
  -1  -1  18   21.29    3.73
  -1  -1  18   25.81    1.96
   1   1 -18   23.06    3.73
   1   1 -18   25.91    2.36
  -1  -1  17    5.20    3.73
  -1  -1  17    3.73    3.43
  -1  -1  17    6.97    1.57
   1   1 -17   12.76    3.63
   1   1 -17    5.20    1.96
  -1  -1  16    3.83    1.86
  -1  -1  16    2.85    3.63
   1   1 -16   -0.10    3.24
   1   1 -16    4.91    2.75
  -1  -1  16    5.50    1.67
  -1  -1  16    2.26    3.73
   1   1 -16    2.75    1.96
  -1  -1  15   32.48    2.45
  -1  -1  15   39.35    4.12
   1   1 -15   36.80    3.73
   1   1 -15   31.01    2.94
   1   1 -15   28.85    4.02
  -1  -1  14   -1.96    3.24
  -1  -1  14   -1.37    1.47
   1   1 -14    1.86    2.06
   1   1 -14    1.08    2.65
  -1  -1  14    2.36    3.14
  -1  -1  14   -1.28    1.57
   1   1 -14    1.86    1.57
   1   1 -14    1.18    3.34
  -1  -1  13    5.89    3.14
  -1  -1  13    2.55    1.57
   1   1 -13    2.36    2.65
   1   1 -13    2.36    1.86
  -1  -1  13    6.77    3.04
  -1  -1  13    6.18    1.57
   1   1 -13    2.06    3.24
   1   1 -13    5.00    1.57
  -1  -1  12   65.84    4.12
  -1  -1  12   59.07    3.14
   1   1 -12   66.73    4.22
   1   1 -12   64.57    3.24
  -1  -1  12   64.57    3.14
  -1  -1  12   61.92    4.22
   1   1 -12   62.02    4.42
   1   1 -12   60.45    3.04
  -1  -1  11   35.03    3.24
  -1  -1  11   39.54    2.45
   1   1 -11   37.09    2.36
   1   1 -11   38.37    3.24
  -1  -1  11   34.15    2.16
  -1  -1  11   32.77    3.34
   1   1 -11   31.40    2.06
   1   1 -11   30.71    3.53
  -1  -1  10  266.31    9.91
  -1  -1  10  258.86   10.21
   1   1 -10  251.69    9.32
   1   1 -10  274.85   10.70
  -1  -1  10  259.44   10.21
   1   1 -10  277.79   10.79
   1   1 -10  285.84   11.87
  -1  -1   9  123.25    5.00
   1   1  -9  111.47    5.30
  -1  -1   9  117.85    5.00
  -1  -1   9  109.80    5.50
   1   1  -9  124.62    6.18
   1   1  -9  117.06    4.91
  -1  -1   8   16.88    2.55
  -1  -1   8   17.96    1.67
   1   1  -8   18.06    1.67
   1   1  -8   20.21    2.45
  -1  -1   8   16.58    2.55
  -1  -1   8   15.60    1.67
   1   1  -8   13.84    1.57
  -1  -1   7  572.46   20.21
  -1  -1   7  567.17   20.31
   1   1  -7  569.91   20.41
   1   1  -7  562.46   19.82
  -1  -1   7  558.63   21.29
  -1  -1   7  563.14   21.20
   1   1  -7  550.58   20.80
   1   1  -7  570.80   21.88
  -1  -1   6   24.63    2.45
  -1  -1   6   18.84    1.57
   1   1  -6   13.93    2.06
   1   1  -6   19.63    1.57
  -1  -1   6   21.39    2.26
  -1  -1   6   25.22    1.67
   1   1  -6   26.10    2.65
   1   1  -6   23.94    1.57
  -1  -1   5  956.92   33.56
  -1  -1   5  946.03   32.97
   1   1  -5  966.64   33.85
   1   1  -5  970.17   33.85
  -1  -1   5  955.84   35.91
  -1  -1   5 1048.96   39.35
   1   1  -5  956.92   35.82
   1   1  -5  932.98   35.13
  -1  -1   4   60.05    2.65
  -1  -1   4   57.31    3.14
   1   1  -4   56.03    2.45
   1   1  -4   57.70    3.14
  -1  -1   4   58.97    3.04
  -1  -1   4   65.16    2.85
  -1  -1   3  449.12   15.70
  -1  -1   3  447.06   15.80
   1   1  -3  442.15   15.60
   1   1  -3  457.85   15.99
  -1  -1   3  443.53   16.68
  -1  -1   3  442.35   16.58
   1   1  -3  446.57   16.78
   1   1  -3  435.29   16.49
  -1  -1   2   52.01    1.96
  -1  -1   2   51.91    2.16
   1   1  -2   52.10    1.96
   1   1  -2   48.67    2.06
  -1  -1   1 2413.89   83.41
  -1  -1   1 2298.10   79.48
   1   1  -1 2424.68   83.90
   1   1  -1 2444.31   84.49
   1   1  -1 2416.83   90.18
   1   1  -1 2312.82   86.25
   1   1   0   20.80    0.88
   1   1   0   22.18    0.88
  -1  -1   0   20.51    0.88
  -1  -1   0   21.98    1.18
   1   1   0   19.92    1.08
   1   1   0   22.08    0.98
  -1  -1  -1 3354.91  116.08
  -1  -1  -1 3336.27  115.40
   1   1   1 3396.13  117.46
   1   1   1 3489.35  120.69
  -1  -1  -1 3409.86  127.27
  -1  -1  -1 3479.53  129.82
   1   1   1 3408.88  127.17
   1   1   1 3414.77  127.47
  -1  -1  -2  342.65   11.97
  -1  -1  -2  372.58   13.15
   1   1   2  352.76   12.46
   1   1   2  365.81   12.76
  -1  -1  -2  354.63   13.35
  -1  -1  -2  352.86   13.54
   1   1   2  355.12   13.64
   1   1   2  356.10   13.44
  -1  -1  -3  368.27   13.15
  -1  -1  -3  380.24   13.35
   1   1   3  385.54   13.74
   1   1   3  351.88   12.36
  -1  -1  -3  381.22   14.42
  -1  -1  -3  392.21   15.11
   1   1   3  388.09   14.72
   1   1   3  385.93   14.92
  -1  -1  -4  229.32    8.34
  -1  -1  -4  229.52    8.73
   1   1   4  224.71    8.14
   1   1   4  239.62    9.13
  -1  -1  -4  240.41   10.01
  -1  -1  -4  236.29    9.22
   1   1   4  247.47    9.62
   1   1   4  230.30    9.62
  -1  -1  -5 4494.15  155.82
  -1  -1  -5 4319.49  149.54
   1   1   5 4435.28  153.47
   1   1   5 4480.42  155.23
  -1  -1  -5 4523.59  169.07
  -1  -1  -5 4262.58  159.16
   1   1   5 4507.89  168.29
   1   1   5 4399.95  164.56
  -1  -1  -6 1312.92   45.73
  -1  -1  -6 1417.92   49.65
   1   1   6 1376.70   48.18
   1   1   6 1340.40   46.71
  -1  -1  -6 1337.45   50.14
  -1  -1  -6 1431.65   54.07
   1   1   6 1409.08   52.79
   1   1   6 1395.35   52.69
  -1  -1  -7   31.30    2.06
  -1  -1  -7   26.49    2.75
   1   1   7   27.97    2.94
   1   1   7   27.18    1.86
  -1  -1  -7   30.03    2.06
  -1  -1  -7   30.32    3.43
   1   1   7   28.26    2.06
   1   1   7   24.92    3.24
  -1  -1  -8 1242.27   43.76
  -1  -1  -8 1230.50   42.98
   1   1   8 1257.97   44.25
   1   1   8 1214.80   42.49
  -1  -1  -8 1243.25   46.71
  -1  -1  -8 1291.33   48.96
   1   1   8 1257.97   47.79
   1   1   8 1264.84   47.49
  -1  -1  -9   11.97    1.86
  -1  -1  -9    9.81    3.53
   1   1   9   14.33    3.63
   1   1   9   10.60    1.86
  -1  -1 -10  870.96   30.71
  -1  -1 -10  892.75   31.89
   1   1  10  857.03   30.22
   1   1  10  870.37   31.11
  -1  -1 -10  866.06   32.77
  -1  -1 -10  877.73   33.76
   1   1  10  924.93   35.62
   1   1  10  841.13   31.79
  -1  -1 -11    9.81    1.86
  -1  -1 -11    5.69    2.75
   1   1  11    4.51    3.14
   1   1  11   11.87    1.77
  -1  -1 -11    7.16    1.86
  -1  -1 -11   11.09    3.53
   1   1  11    8.73    1.77
   1   1  11   16.88    3.83
  -1  -1 -12   61.62    4.12
  -1  -1 -12   59.86    3.24
   1   1  12   55.83    3.04
   1   1  12   67.41    4.51
  -1  -1 -13   15.01    2.06
  -1  -1 -13   14.92    2.94
   1   1  13   21.00    3.43
   1   1  13   15.80    1.86
  -1  -1 -13   20.31    2.26
  -1  -1 -13   14.42    3.73
   1   1  13   15.41    4.02
   1   1  13   14.03    1.86
  -1  -1 -14  251.40    9.62
  -1  -1 -14  248.45   10.40
   1   1  14  245.12    9.32
   1   1  14  234.72    9.81
  -1  -1 -14  255.72   10.30
  -1  -1 -14  248.55   11.09
   1   1  14  255.32   10.21
   1   1  14  251.50   11.58
  -1  -1 -15   16.58    3.34
  -1  -1 -15   20.02    2.45
   1   1  15   15.70    3.53
   1   1  15   19.23    2.16
  -1  -1 -15   15.60    2.16
  -1  -1 -15   10.50    3.83
   1   1  15   16.88    4.12
   1   1  15   18.35    2.06
  -1  -1 -16   54.46    4.71
   1   1  16   47.30    3.04
  -1  -1 -16   52.50    4.91
  -1  -1 -16   45.33    3.14
   1   1  16   46.32    5.10
   1   1  16   49.46    3.04
  -1  -1 -17   29.83    3.34
  -1  -1 -17   25.91    4.02
   1   1  17   29.05    2.55
   1   1  17   28.36    4.22
  -1  -1 -17   21.78    4.02
  -1  -1 -17   24.63    2.45
   1   1  17   27.77    2.26
   1   1  17   27.28    4.12
  -1  -1 -18   21.78    4.22
  -1  -1 -18   27.97    3.73
   1   1  18   24.43    2.55
   1   1  18   22.57    3.93
  -1  -1 -18   26.40    4.22
  -1  -1 -18   22.96    2.36
   1   1  18   24.83    3.93
   1   1  18   21.88    2.06
  -1  -1 -19   28.06    4.61
  -1  -1 -19   35.52    4.32
   1   1  19   20.51    3.53
   1   1  19   22.37    2.65
  -1  -1 -19   19.92    4.02
  -1  -1 -19   24.24    2.36
   1   1  19   21.49    2.06
   1   1  19   22.77    4.12
  -1  -1 -20   -0.20    3.93
  -1  -1 -20    5.79    3.93
   1   1  20    7.95    3.63
   1   1  20    1.57    2.65
  -1  -1 -20    4.81    1.96
  -1  -1 -20    2.45    2.85
   1   1  20    2.65    1.47
   1   1  20    3.63    2.85
  -1  -1 -21    0.69    3.53
  -1  -1 -21   -5.89    2.75
   1   1  21   -1.18    3.43
   1   1  21   -7.36    3.34
  -1  -1 -21    1.77    2.06
  -1  -1 -21   -0.59    1.67
   1   1  21   -1.77    1.96
   1   1  21    1.67    1.37
  -1  -2  20    2.06    3.04
  -1  -2  20    1.18    2.94
   1   2 -20    0.88    2.85
   1   2 -20    1.37    3.63
  -1  -2  20   -1.18    2.06
  -1  -2  20    2.55    1.08
   1   2 -20   -2.26    1.96
   1   2 -20   -0.49    1.28
  -1  -2  19    3.43    2.45
   1   2 -19    0.39    3.63
   1   2 -19    6.77    3.34
  -1  -2  19    1.47    2.75
  -1  -2  19    4.32    1.08
   1   2 -19    1.77    1.67
   1   2 -19    4.42    2.26
  -1  -2  18   44.25    4.22
  -1  -2  18   45.73    2.45
   1   2 -18   53.77    4.02
   1   2 -18   51.61    3.14
  -1  -2  17   18.35    2.26
  -1  -2  17   11.28    3.93
   1   2 -17   18.45    3.43
   1   2 -17   26.59    3.73
   1   2 -17   18.55    2.16
  -1  -2  16   29.05    2.55
  -1  -2  16   26.79    4.02
  -1  -2  16   23.55    1.86
  -1  -2  16   17.56    4.02
   1   2 -16   24.04    3.34
  -1  -2  15   -0.79    2.85
  -1  -2  15    0.10    1.67
   1   2 -15   -0.29    2.85
   1   2 -15    3.43    2.16
  -1  -2  15    2.75    1.37
  -1  -2  15    1.47    3.34
   1   2 -15   -2.75    1.67
   1   2 -15    3.04    2.85
  -1  -2  14   -0.10    1.47
  -1  -2  14    0.00    2.75
   1   2 -14   -2.26    2.55
   1   2 -14    0.59    1.86
  -1  -2  14   -0.29    1.28
  -1  -2  14   -5.10    3.04
   1   2 -14    1.67    1.57
   1   2 -14   -2.55    2.75
  -1  -2  13    6.67    1.67
  -1  -2  13    7.85    2.85
   1   2 -13   13.05    1.86
   1   2 -13   10.21    2.65
  -1  -2  13    7.95    1.37
  -1  -2  13   10.01    2.94
   1   2 -13   10.50    2.85
   1   2 -13    8.14    1.57
  -1  -2  12   64.37    4.12
  -1  -2  12   64.47    3.24
   1   2 -12   62.80    4.02
   1   2 -12   64.17    3.24
   1   2 -12   66.82    4.12
   1   2 -12   59.76    2.94
  -1  -2  11    5.50    2.55
  -1  -2  11    2.16    1.47
   1   2 -11    0.98    2.26
   1   2 -11    1.18    1.47
  -1  -2  11    3.34    2.65
  -1  -2  11    2.55    1.28
   1   2 -11    3.53    1.37
   1   2 -11    0.69    2.55
  -1  -2  10  352.76   12.85
  -1  -2  10  346.97   13.15
   1   2 -10  339.22   12.36
   1   2 -10  341.08   12.95
  -1  -2  10  333.04   13.35
  -1  -2  10  349.43   13.35
   1   2 -10  329.90   12.66
   1   2 -10  343.34   13.54
  -1  -2   9  527.33   19.92
  -1  -2   9  510.06   19.82
   1   2  -9  518.01   19.63
   1   2  -9  537.43   20.61
  -1  -2   8  104.11    4.32
  -1  -2   8  118.54    5.40
   1   2  -8   96.65    4.71
   1   2  -8   96.75    4.02
  -1  -2   8  108.72    5.20
  -1  -2   8  119.81    4.81
  -1  -2   7   94.00    4.42
  -1  -2   7   96.56    3.93
   1   2  -7   96.56    3.93
   1   2  -7   85.76    4.12
  -1  -2   7  100.58    4.02
  -1  -2   7   93.02    4.42
  -1  -2   6  366.20   13.05
  -1  -2   6  367.19   13.35
   1   2  -6  360.81   12.85
   1   2  -6  360.02   13.15
  -1  -2   6  377.29   14.52
  -1  -2   6  369.74   13.93
   1   2  -6  374.55   14.13
   1   2  -6  372.58   14.23
  -1  -2   5  151.21    5.99
  -1  -2   5  146.99    5.50
   1   2  -5  150.13    5.89
   1   2  -5  151.11    5.59
  -1  -2   5  142.97    5.50
  -1  -2   5  146.50    5.89
   1   2  -5  150.23    5.79
   1   2  -5  142.09    5.59
  -1  -2   4  641.55   22.47
  -1  -2   4  659.89   23.26
   1   2  -4  663.72   23.16
   1   2  -4  660.39   23.26
  -1  -2   4  656.56   24.53
  -1  -2   4  686.29   25.81
   1   2  -4  685.41   25.71
   1   2  -4  662.94   24.83
  -1  -2   3   11.09    1.47
  -1  -2   3   12.95    1.86
   1   2  -3   13.44    1.18
   1   2  -3   11.87    2.06
   1   2  -3   11.87    0.69
  -1  -2   2 2041.99   70.85
  -1  -2   2 2089.09   72.32
   1   2  -2 2094.00   72.61
   1   2  -2 2069.47   71.63
   1   2  -2 2200.96   82.52
  -1  -2   1  707.78   24.63
  -1  -2   1  673.24   23.45
   1   2  -1  694.04   24.14
   1   2  -1  692.08   24.04
  -1  -2   1  744.97   27.97
  -1  -2   1  705.42   26.40
   1   2  -1  727.90   27.18
   1   2  -1  731.53   27.38
  -1  -2   0   19.13    1.18
  -1  -2   0   18.45    1.08
   1   2   0   20.41    1.18
   1   2   0   17.76    1.08
  -1  -2   0   18.55    1.57
  -1  -2   0   17.76    0.98
   1   2   0   18.84    1.08
   1   2   0   18.35    1.57
  -1  -2  -1    0.29    0.88
  -1  -2  -1   -1.08    1.18
   1   2   1   -0.39    1.18
   1   2   1    0.79    0.88
  -1  -2  -1    2.26    1.57
  -1  -2  -1    0.49    0.79
   1   2   1    0.59    0.79
   1   2   1   -0.29    1.57
  -1  -2  -2  319.69   11.38
  -1  -2  -2  324.01   11.38
   1   2   2  337.06   11.97
   1   2   2  325.38   11.48
  -1  -2  -2  336.37   13.05
  -1  -2  -2  330.39   12.56
   1   2   2  344.32   13.35
   1   2   2  327.94   12.46
  -1  -2  -3  470.71   16.58
  -1  -2  -3  461.78   16.49
   1   2   3  468.75   16.49
   1   2   3  482.97   17.17
  -1  -2  -3  473.95   17.96
  -1  -2  -3  481.89   18.64
   1   2   3  460.21   17.47
   1   2   3  498.48   19.23
  -1  -2  -4    7.46    1.86
  -1  -2  -4    8.05    3.24
   1   2   4    5.10    1.86
   1   2   4    9.52    3.14
  -1  -2  -4   10.99    1.96
  -1  -2  -4    6.97    3.73
   1   2   4   14.23    3.53
   1   2   4   11.48    2.06
  -1  -2  -5 1661.27   57.70
  -1  -2  -5 1726.03   60.15
   1   2   5 1736.82   60.25
   1   2   5 1684.82   58.78
  -1  -2  -5 1686.78   63.19
  -1  -2  -5 1681.87   63.39
   1   2   5 1690.70   63.39
   1   2   5 1746.64   65.84
  -1  -2  -6  421.65   15.01
  -1  -2  -6  423.80   15.41
   1   2   6  426.85   15.21
   1   2   6  422.43   15.41
  -1  -2  -6  415.56   15.90
  -1  -2  -6  406.63   16.19
   1   2   6  408.40   16.19
   1   2   6  411.83   15.80
  -1  -2  -7  128.54    5.10
  -1  -2  -7  123.74    5.50
   1   2   7  116.38    4.61
   1   2   7  122.66    5.59
  -1  -2  -7  121.68    5.20
  -1  -2  -7  113.92    5.89
   1   2   7  117.55    5.00
   1   2   7  115.10    5.89
  -1  -2  -8   78.11    3.63
  -1  -2  -8   78.70    4.32
   1   2   8   74.38    3.43
   1   2   8   73.30    4.42
  -1  -2  -8   83.01    5.10
  -1  -2  -8   84.68    3.93
   1   2   8   76.73    4.91
   1   2   8   82.52    3.93
  -1  -2  -9   16.68    3.93
  -1  -2  -9   23.06    2.16
   1   2   9   22.47    2.36
   1   2   9   21.69    3.93
  -1  -2 -10   98.42    4.42
  -1  -2 -10  110.98    5.69
   1   2  10   98.81    4.42
   1   2  10   94.89    5.40
  -1  -2 -10   94.99    4.51
  -1  -2 -10   90.47    5.89
   1   2  10   90.08    4.32
   1   2  10   94.20    5.99
  -1  -2 -11  666.27   23.65
  -1  -2 -11  723.38   26.20
   1   2  11  677.07   24.04
   1   2  11  678.34   24.63
  -1  -2 -12  170.64    6.77
  -1  -2 -12  172.11    7.65
   1   2  12  163.28    6.48
   1   2  12  169.66    7.65
  -1  -2 -12  182.61    9.03
  -1  -2 -12  178.00    7.46
   1   2  12  170.84    8.54
   1   2  12  166.52    6.97
  -1  -2 -13   26.79    2.45
  -1  -2 -13   30.42    3.53
   1   2  13   22.96    2.16
   1   2  13   30.22    3.83
  -1  -2 -13   29.24    2.36
  -1  -2 -13   26.98    4.22
   1   2  13   23.75    4.32
   1   2  13   24.53    2.36
  -1  -2 -14  155.23    6.48
  -1  -2 -14  149.35    7.26
   1   2  14  146.99    6.08
   1   2  14  138.26    6.87
  -1  -2 -14  136.49    7.65
  -1  -2 -14  149.64    6.48
   1   2  14  140.22    6.18
   1   2  14  146.01    7.85
  -1  -2 -15   89.10    4.42
  -1  -2 -15   78.60    5.20
   1   2  15   82.23    4.02
   1   2  15   79.87    5.20
   1   2  15   75.16    3.93
   1   2  15   74.58    5.50
  -1  -2 -16   10.21    2.94
  -1  -2 -16   15.99    3.73
   1   2  16   11.87    2.06
   1   2  16    8.34    3.93
  -1  -2 -16   10.70    2.16
  -1  -2 -16   14.52    4.12
   1   2  16   13.54    2.06
   1   2  16   12.56    4.12
  -1  -2 -17    4.51    2.85
  -1  -2 -17    1.57    3.53
   1   2  17    2.85    1.86
   1   2  17   -5.69    3.73
  -1  -2 -17   -1.28    1.96
  -1  -2 -17   -0.29    3.83
   1   2  17    0.29    1.77
   1   2  17   -4.91    3.43
  -1  -2 -18   -0.98    3.14
  -1  -2 -18    9.13    3.83
   1   2  18    2.85    1.96
   1   2  18    3.04    3.83
  -1  -2 -18    3.14    3.93
  -1  -2 -18    5.30    1.86
   1   2  18    4.71    1.77
   1   2  18    6.08    3.43
  -1  -2 -19    5.30    4.02
  -1  -2 -19   -1.08    3.73
   1   2  19    2.36    2.06
   1   2  19   -0.20    3.43
  -1  -2 -19    1.77    3.73
  -1  -2 -19    1.28    1.86
   1   2  19    1.18    1.57
   1   2  19    5.30    3.53
   1   2  20   18.15    2.94
   1   2  20   13.74    3.63
  -1  -2 -20   14.52    3.53
  -1  -2 -20   18.55    2.36
   1   2  20   17.37    1.96
   1   2  20   12.85    3.14
  -1  -2 -21   -0.88    3.73
  -1  -2 -21   -1.47    2.94
   1   2  21    2.75    3.43
   1   2  21    9.03    3.63
  -1  -2 -21    0.20    2.45
   1   2  21    0.20    1.57
   1   2  21   -1.18    2.06
  -1  -3  20    3.73    3.34
  -1  -3  20   -2.75    2.85
   1   3 -20   -1.37    2.55
   1   3 -20   -0.59    3.53
  -1  -3  20   -0.98    1.96
  -1  -3  20    2.36    0.88
  -1  -3  19    2.06    2.65
  -1  -3  19    5.79    3.43
   1   3 -19    8.24    3.93
   1   3 -19    6.67    3.24
  -1  -3  19   -1.28    2.36
  -1  -3  19    2.06    0.79
   1   3 -19    1.18    1.47
  -1  -3  18    6.77    2.26
  -1  -3  18    6.28    3.24
   1   3 -18    4.02    3.24
   1   3 -18    9.62    3.63
  -1  -3  17   15.11    2.16
  -1  -3  17   12.66    3.53
   1   3 -17   16.98    3.24
   1   3 -17   10.70    3.14
   1   3 -17   18.74    2.26
   1   3 -17   15.41    1.96
  -1  -3  16    3.73    3.34
  -1  -3  16    1.08    1.08
   1   3 -16   -1.18    1.86
   1   3 -16    2.75    1.77
  -1  -3  15    8.24    1.86
  -1  -3  15   14.33    3.14
   1   3 -15    1.28    3.04
   1   3 -15    7.07    2.26
  -1  -3  15   10.30    3.34
  -1  -3  15   10.30    1.28
   1   3 -15   10.11    2.06
   1   3 -15    7.56    1.77
  -1  -3  14    4.71    1.67
  -1  -3  14    2.85    2.75
   1   3 -14    5.30    1.96
   1   3 -14    5.59    2.65
  -1  -3  14    3.04    2.85
  -1  -3  14    1.86    1.08
   1   3 -14    4.12    1.57
   1   3 -14    2.16    1.86
  -1  -3  13    2.36    1.47
  -1  -3  13    1.47    2.65
   1   3 -13    0.00    1.67
   1   3 -13    3.43    2.45
  -1  -3  13    1.86    1.08
  -1  -3  13    4.51    2.85
   1   3 -13    2.45    1.47
   1   3 -13    1.47    1.77
  -1  -3  12   13.74    1.77
  -1  -3  12    9.52    2.75
   1   3 -12   11.19    2.55
   1   3 -12   12.85    1.77
   1   3 -12   10.99    1.77
   1   3 -12   13.54    1.57
  -1  -3  11   17.07    1.77
  -1  -3  11   13.64    2.65
   1   3 -11   18.74    2.55
   1   3 -11   16.29    1.86
  -1  -3  11   14.92    1.18
  -1  -3  11   11.78    2.85
   1   3 -11   14.42    1.57
   1   3 -11   16.39    1.86
  -1  -3  10   -0.39    1.47
  -1  -3  10   -1.47    2.26
   1   3 -10    1.28    2.06
   1   3 -10    1.57    1.47
  -1  -3  10    1.47    0.88
  -1  -3  10    0.79    2.65
   1   3 -10    1.77    1.47
   1   3 -10   -0.49    1.28
  -1  -3   9    7.07    1.57
  -1  -3   9   10.30    2.55
   1   3  -9   10.01    1.57
   1   3  -9    8.64    2.26
  -1  -3   9    5.50    2.65
  -1  -3   9    6.67    0.88
   1   3  -9    5.50    1.28
   1   3  -9    6.18    1.37
   1   3  -8   28.85    2.85
  -1  -3   8   27.18    1.37
  -1  -3   8   24.92    2.85
   1   3  -8   26.59    1.67
   1   3  -8   28.65    1.67
  -1  -3   7  287.41   10.50
  -1  -3   7  310.57   11.58
   1   3  -7  303.11   10.99
   1   3  -7  323.42   12.07
  -1  -3   7  313.51   12.17
  -1  -3   7  308.31   11.68
   1   3  -7  304.29   11.58
   1   3  -7  293.49   11.19
  -1  -3   6   81.84    3.53
  -1  -3   6   72.71    3.63
   1   3  -6   72.22    3.63
   1   3  -6   74.58    3.14
   1   3  -6   90.67    3.73
  -1  -3   5   38.37    2.55
  -1  -3   5   36.40    2.16
   1   3  -5   35.03    1.86
   1   3  -5   33.66    2.45
  -1  -3   4  837.21   29.44
  -1  -3   4  887.74   31.01
   1   3  -4  832.40   29.05
   1   3  -4  867.33   30.42
  -1  -3   4  875.08   32.77
  -1  -3   4  852.32   31.89
  -1  -3   3  253.75    9.42
  -1  -3   3  256.50    9.22
   1   3  -3  243.25    8.93
   1   3  -3  246.98    8.93
   1   3  -3  249.24    9.32
   1   3  -3  256.89    9.62
  -1  -3   2  772.15   26.98
  -1  -3   2  721.91   25.32
   1   3  -2  756.84   26.49
   1   3  -2  731.82   25.51
  -1  -3   2  737.81   27.57
  -1  -3   2  748.01   28.06
   1   3  -2  757.92   28.36
   1   3  -2  718.67   26.89
  -1  -3   1    3.24    1.47
  -1  -3   1    5.20    1.67
   1   3  -1    3.34    1.37
   1   3  -1    4.71    1.57
  -1  -3   1    5.50    1.86
  -1  -3   1    5.99    0.98
   1   3  -1    5.50    1.08
   1   3  -1    6.57    1.57
  -1  -3   0  162.30    6.08
  -1  -3   0  156.51    5.79
   1   3   0  154.06    5.69
   1   3   0  163.58    6.08
  -1  -3   0  169.46    6.57
  -1  -3   0  169.66    6.97
   1   3   0  169.66    6.57
   1   3   0  173.00    6.97
  -1  -3  -1 1621.04   56.23
  -1  -3  -1 1782.94   61.82
   1   3   1 1736.82   60.25
   1   3   1 1607.30   55.74
  -1  -3  -1 1757.43   65.94
  -1  -3  -1 1716.22   64.17
   1   3   1 1726.03   64.66
   1   3   1 1718.18   64.27
  -1  -3  -2    6.57    1.96
  -1  -3  -2    1.67    2.55
   1   3   2    5.20    1.86
   1   3   2    1.67    2.65
  -1  -3  -2    5.10    1.57
  -1  -3  -2    5.20    2.94
   1   3   2    4.12    2.65
   1   3   2    4.02    1.57
  -1  -3  -3    7.95    2.26
  -1  -3  -3   16.68    3.53
   1   3   3    9.52    2.26
   1   3   3   11.87    3.34
  -1  -3  -3    6.48    3.53
  -1  -3  -3   10.21    1.96
   1   3   3   10.60    3.34
   1   3   3    7.75    1.86
  -1  -3  -4 4868.01  168.48
  -1  -3  -4 4849.37  167.99
   1   3   4 4880.77  168.87
   1   3   4 5021.09  173.98
  -1  -3  -4 4908.24  183.30
  -1  -3  -4 4947.49  185.06
   1   3   4 4894.51  182.71
   1   3   4 4954.36  185.26
   1   3   5    8.34    1.86
   1   3   5   11.78    2.94
  -1  -3  -5   14.03    1.96
  -1  -3  -5   21.98    3.53
   1   3   5   12.17    1.86
   1   3   5   12.66    3.34
  -1  -3  -6   96.36    4.12
  -1  -3  -6   86.74    4.61
   1   3   6   89.49    3.83
   1   3   6   87.04    4.51
  -1  -3  -6   89.29    5.20
  -1  -3  -6   87.23    4.02
   1   3   6   89.59    5.10
   1   3   6   84.09    3.93
  -1  -3  -7  541.95   19.23
  -1  -3  -7  552.05   19.92
   1   3   7  536.94   19.04
   1   3   7  545.97   19.72
  -1  -3  -7  548.91   20.90
  -1  -3  -7  540.67   21.20
   1   3   7  575.11   22.47
   1   3   7  544.79   20.80
  -1  -3  -8 1264.84   44.16
  -1  -3  -8 1325.68   46.61
   1   3   8 1300.16   45.73
   1   3   8 1284.46   44.84
  -1  -3  -8 1250.12   47.00
  -1  -3  -8 1254.05   47.79
   1   3   8 1221.66   46.02
   1   3   8 1316.85   50.04
  -1  -3  -9   11.58    2.16
   1   3   9    7.36    3.43
  -1  -3  -9   11.09    3.93
  -1  -3  -9   16.58    2.06
   1   3   9   12.17    3.83
   1   3   9   12.36    2.26
  -1  -3 -10  171.33    7.56
  -1  -3 -10  171.23    6.87
   1   3  10  170.54    6.67
   1   3  10  173.19    7.75
  -1  -3 -11   29.54    2.55
  -1  -3 -11   32.09    3.53
   1   3  11   31.30    2.36
   1   3  11   36.11    4.02
  -1  -3 -11   33.17    4.61
  -1  -3 -11   29.05    2.45
   1   3  11   27.87    4.02
   1   3  11   31.69    2.55
  -1  -3 -12  348.05   12.85
  -1  -3 -12  387.11   14.92
   1   3  12  370.42   13.54
   1   3  12  355.61   13.84
  -1  -3 -12  345.70   13.54
  -1  -3 -12  334.51   14.42
   1   3  12  360.32   14.13
   1   3  12  356.98   15.01
  -1  -3 -13  142.38    5.99
  -1  -3 -13  147.38    7.16
   1   3  13  148.17    6.08
   1   3  13  152.19    7.26
  -1  -3 -13  142.87    6.18
  -1  -3 -13  128.05    7.46
   1   3  13  144.24    6.28
   1   3  13  133.16    7.26
  -1  -3 -14    6.48    2.16
  -1  -3 -14    4.02    3.34
   1   3  14    6.87    1.77
   1   3  14   11.38    3.43
  -1  -3 -14    4.71    1.86
  -1  -3 -14    6.57    4.32
   1   3  14    2.94    2.26
[truncated: 2,612,957 more chars]
